# Supplementary material for: Hox-dependent coordination of mouse cardiac progenitor cell patterning and differentiation
Source: eLife. 2020 Aug 17;9:e55124. doi: 10.7554/eLife.55124 (PMC7462617; doi:10.7554/eLife.55124)
Supplement: Supplementary file 1. [file elife-55124-supp1.xlsx]

## Sheet: GFPvsTdT
gene	baseMean	log2FoldChange	lfcSE	stat	pvalue	padj	GFP_1	GFP_2	GFP_3	GFP neg	TdT_1	TdT_2	TdT_3	TdT neg
Hba-x	62065	-7.4	0.13	-55.6	0	0	301	404	476	164736	58794	74570	60125	137114
Hbb-bh1	11332	-7.2	0.16	-43.8	0	0	54	65	92	39204	8670	11607	9459	21508
Hbb-y	33483	-7.9	0.18	-44.7	0	0	107	180	260	62995	37943	42779	40144	83459
Slc4a1	3045	-7.2	0.21	-33.7	2.62e-248	1.07e-244	25	16	32	7672	3651	3365	3641	5955
Prtg	14186	3.1	0.1	31	2.07e-210	6.76e-207	25834	25715	25268	25427	2913	3088	2854	2394
Bcl11a	2624	-4.6	0.15	-30.7	5.3e-207	1.44e-203	209	217	229	87	5448	4543	5419	4837
Actc1	2568	4.1	0.14	28.1	1.04e-173	2.42e-170	5555	5774	5356	2742	362	348	286	124
Car2	2806	-3.8	0.14	-27.7	8.97e-169	1.83e-165	217	255	240	5162	3296	3231	3561	6486
Slc1a2	3878	-3.6	0.13	-27	4.73e-161	8.56e-158	530	641	532	1349	7114	6533	7042	7284
Hba-a1	2593	-8.1	0.3	-27	5.95e-161	9.71e-158	8	8	19	1414	2605	4237	2768	9683
Cntn2	1881	-4.3	0.16	-26.6	2.21e-155	3.27e-152	192	163	224	435	3929	3698	3927	2477
Map2	5036	-3.2	0.12	-26.1	2.04e-150	2.77e-147	864	852	965	1643	8855	7786	8814	10511
Nhlh2	1406	-4.2	0.16	-26	4.68e-149	5.87e-146	130	134	142	344	2466	2502	2555	2972
Arg1	2120	3.9	0.16	24.9	7.1e-137	8.26e-134	4864	4552	4873	1076	277	381	309	631
Ywhaz	33604	2.6	0.11	24.1	4.91e-128	5.34e-125	57186	68074	57839	43605	9883	10737	10012	11497
Slc2a3	2201	3.4	0.14	24	1.09e-127	1.11e-124	4686	4194	4834	2120	461	442	433	435
Ank1	1331	-5.3	0.22	-23.8	1.16e-125	1.12e-122	42	35	62	1869	1678	2143	1656	3162
Pou2f2	1625	-4.8	0.2	-23.8	9.76e-125	8.84e-122	108	81	123	122	2596	3654	2735	3578
Cldn6	1633	4.1	0.19	21.7	4.2e-104	3.6e-101	4179	3294	4309	549	267	170	250	45
C130071C03Rik	1312	-3.6	0.17	-21.5	1.83e-102	1.49e-99	164	194	179	579	2043	2468	2086	2780
Tubb2b	2082	-3.3	0.15	-21.4	2.58e-101	2e-98	365	391	369	823	3766	4107	3209	3629
Miat	10303	-3.2	0.15	-21.1	1.23e-98	9.08e-96	2150	1583	2358	6395	17374	20215	17721	14627
Ttn	10230	2.6	0.12	21	2.93e-98	2.08e-95	20937	17057	20640	11188	3312	3466	2952	2291
Myt1	1344	-4.2	0.2	-20.9	2.32e-97	1.58e-94	124	144	165	454	2792	2081	2893	2096
Ncan	2100	-5	0.24	-20.8	9.29e-96	6.06e-93	154	69	175	352	4068	4529	4137	3313
Ina	1825	-3.5	0.17	-20.7	2.04e-95	1.28e-92	301	230	314	941	3118	3633	3091	2972
Ldha	17231	2	0.1	20.4	8.78e-93	5.3e-90	25150	26406	25035	35762	6441	6247	6456	6350
Gata4	989	3.6	0.18	19.9	2.9e-88	1.69e-85	2238	2170	2192	546	206	159	181	219
Gm10800	1640	5	0.25	19.9	5.18e-88	2.91e-85	3701	3670	3487	1379	86	191	83	524
Shh	584	5	0.25	19.7	8.41e-87	4.57e-84	1281	1548	1332	319	47	33	46	65
Dcc	2932	-3.1	0.16	-19.7	1.91e-86	1e-83	562	534	616	1244	5099	3921	5302	6180
Slc25a37	8261	-2.1	0.11	-19.6	2.47e-85	1.26e-82	1975	2071	2004	13406	8988	8191	8763	20688
Prdm1	1046	4	0.2	19.5	6.47e-85	3.19e-82	2329	2644	2299	563	173	112	167	83
Lin28a	3075	4	0.21	19.5	2.2e-84	1.05e-81	7171	5251	7164	3676	468	243	473	153
Thsd7a	1061	-3.4	0.17	-19.4	6.94e-84	3.23e-81	200	176	188	495	1944	2034	1832	1620
St18	1442	-3.1	0.16	-19.3	7.12e-83	3.23e-80	279	357	304	537	2499	2737	2559	2262
Jam2	2160	-3	0.16	-19.2	1.63e-82	7.17e-80	382	487	418	1590	3218	4149	3190	3843
Smyd1	702	5	0.26	19	1.23e-80	5.28e-78	1667	1403	1649	740	67	27	53	11
2610203C20Rik	5016	-3.3	0.17	-18.9	1.09e-79	4.56e-77	791	1245	750	863	9022	8742	9078	9639
Lhx1	976	-4.2	0.22	-18.8	8.2e-79	3.34e-76	108	77	105	66	1629	2177	1548	2096
Ckb	1735	-2.8	0.15	-18.7	1.02e-77	4.04e-75	460	405	466	1285	2894	3294	3122	1956
A330074H02Rik	603	-6.8	0.37	-18.5	1.95e-76	7.57e-74	7	6	20	44	1193	1012	1170	1373
Mir124-2hg	2450	-2.6	0.14	-18.5	4.98e-76	1.89e-73	614	584	645	2705	3681	3297	3852	4218
Srgap3	7589	-2.5	0.13	-18.3	3.51e-75	1.3e-72	2284	1821	2468	5843	11752	12370	11894	12276
Fabp7	2005	-3.8	0.21	-18.3	4.29e-75	1.55e-72	170	359	205	1042	3241	3548	3405	4068
Fth1	6334	-2	0.11	-18	1.94e-72	6.88e-70	1870	1973	2062	5713	7318	7507	8068	16163
Sptb	2590	-2.4	0.13	-17.8	3.21e-71	1.11e-68	595	565	548	3987	3236	2661	3023	6103
Paics	16899	1.8	0.1	17.8	1.67e-70	5.69e-68	25516	27613	24839	25609	7336	7618	7226	9435
Epha3	1429	-2.7	0.16	-17.5	1.51e-68	5.03e-66	366	406	352	239	2598	2353	2598	2519
Gria2	516	-4.1	0.24	-17.4	9.67e-68	3.15e-65	51	58	54	44	906	1052	931	1030
Glra1	1000	-3.5	0.2	-17.3	6.67e-67	2.13e-64	149	212	145	597	1777	2148	1774	1198
Zfhx4	16394	-1.7	0.1	-16.8	1.79e-63	5.61e-61	7619	7182	7787	8283	24167	26020	24165	25926
Tfap2b	2737	-2.8	0.17	-16.7	2.47e-62	7.6e-60	666	506	714	2019	3900	4791	4036	5264
Nckap5	1292	-3.2	0.19	-16.6	3.39e-62	1.02e-59	220	263	217	831	2290	1683	2251	2579
Rnasel	850	-3.4	0.21	-16.6	4.06e-62	1.2e-59	101	145	127	199	1223	1519	1191	2298
Mapk10	576	-5.3	0.32	-16.6	5.13e-62	1.49e-59	16	49	25	202	1162	1116	1080	957
Rab3c	508	-4.5	0.27	-16.6	1.09e-61	3.13e-59	34	50	33	116	882	756	927	1262
Akap6	1477	-4.1	0.25	-16.5	2.01e-61	5.64e-59	206	88	205	333	3132	2325	3090	2442
Add2	757	-3.7	0.22	-16.4	1.89e-60	5.22e-58	110	70	112	746	1254	1209	1259	1294
Trim71	6898	2.8	0.17	16.4	3.15e-60	8.57e-58	13882	11163	13982	9360	2120	1284	2129	1264
Map6	813	-3	0.18	-16.3	6.91e-60	1.85e-57	196	194	182	588	1534	1477	1542	788
Srrm4os	872	-3.4	0.21	-16.1	2.16e-58	5.68e-56	145	167	141	491	1768	1264	1722	1279
Ikzf1	907	-4.2	0.26	-16	6.54e-58	1.69e-55	32	60	32	1071	817	633	839	3768
Ripply3	332	5.4	0.34	16	9.53e-58	2.43e-55	698	934	779	33	21	13	20	157
Epb42	491	-5.9	0.37	-16	2.77e-57	6.94e-55	9	9	6	688	436	541	453	1787
Kel	528	-7.8	0.49	-16	2.85e-57	7.04e-55	3	4	3	698	734	763	747	1270
Tbx15	741	-3.6	0.23	-15.9	2.97e-57	7.22e-55	98	133	95	11	1208	1578	1173	1631
Gm33366	725	-4.9	0.31	-15.9	6.27e-57	1.5e-54	25	78	31	166	1152	1542	1188	1620
Eno1	7285	1.9	0.12	15.9	7.12e-57	1.68e-54	11250	11173	11064	12339	2879	3464	2949	3159
Zbtb20	3892	-1.9	0.12	-15.8	5.16e-56	1.2e-53	1624	1616	1664	1585	5632	6488	5913	6616
Pkhd1l1	1050	-4	0.25	-15.7	1.41e-55	3.23e-53	80	89	65	653	1431	789	1448	3849
Elavl3	1423	-2.5	0.16	-15.7	1.65e-55	3.75e-53	433	365	424	982	2244	2551	2279	2110
Mrc1	385	-5.2	0.33	-15.6	4.91e-55	1.1e-52	12	29	25	61	848	783	752	569
Scrt2	617	-4.6	0.29	-15.6	6.2e-55	1.37e-52	64	27	65	152	1187	1393	1132	917
Hemgn	1579	-10.3	0.66	-15.5	6.32e-54	1.37e-51	0	3	2	1206	1841	1845	1833	5900
Srrm4	3192	-2.1	0.14	-15.3	8.55e-53	1.83e-50	1170	955	1248	2902	4967	4934	4936	4423
Dner	264	-5.9	0.38	-15.2	1.66e-52	3.51e-50	8	13	10	51	591	580	593	269
Igf1	1879	-3.9	0.25	-15.2	2.07e-52	4.32e-50	162	425	184	751	3343	3948	3459	2756
Slc30a10	492	-6.5	0.42	-15.2	3.65e-52	7.54e-50	10	3	7	924	617	385	631	1356
Aldh1a2	1826	2.1	0.14	15.2	3.9e-52	7.95e-50	3724	3429	3835	537	866	837	828	554
Hmga1	1106	2.7	0.18	15	5.01e-51	1.01e-48	1845	1466	1868	2764	285	231	265	124
RP23-145I16.5	560	3.7	0.25	15	1.45e-50	2.88e-48	1311	1413	1313	102	126	69	109	38
Gm37613	538	-3.9	0.26	-14.9	1.66e-50	3.26e-48	46	57	59	118	671	1070	702	1581
Dnm3os	1228	-3.6	0.24	-14.9	5.63e-50	1.09e-47	125	282	146	241	2073	2278	2081	2600
Zfp536	924	-2.8	0.19	-14.8	2.17e-49	4.16e-47	193	195	225	855	1578	1263	1566	1515
Fkbp1a	6092	1.8	0.13	14.7	8.33e-49	1.58e-46	11187	9160	11509	6551	3001	2967	2942	1420
Tubb3	526	-3.2	0.22	-14.6	3.68e-48	6.9e-46	97	116	115	391	982	1076	1001	433
Lrrn1	3637	-1.8	0.12	-14.5	6.07e-48	1.12e-45	1420	1580	1460	2933	4888	5609	4949	6261
Gapdh	12955	2	0.14	14.5	1.76e-47	3.22e-45	18164	19515	19099	27395	4008	6097	4473	4890
Dsp	1943	2.4	0.17	14.4	2.99e-47	5.37e-45	4239	3353	4032	780	797	555	784	1006
Tuba1a	8626	-1.8	0.12	-14.4	3e-47	5.37e-45	4116	3822	3840	5387	12358	15373	12772	11341
Sned1	1268	-2.5	0.17	-14.4	8.82e-47	1.56e-44	389	338	380	149	1994	2400	1891	2604
Nfasc	1542	-2.7	0.19	-14.4	9.98e-47	1.75e-44	348	512	325	1024	2674	2725	2503	2224
Gypa	766	-8	0.56	-14.3	3.48e-46	6.03e-44	1	1	6	1325	674	544	685	2890
Nefm	3527	-2.6	0.19	-14.2	6.17e-46	1.06e-43	1280	696	1186	728	6492	6594	6350	4888
Mt1	379	-4.7	0.33	-14.2	9.28e-46	1.58e-43	13	24	14	103	396	537	407	1542
Kif1a	837	-2.6	0.18	-14.2	1.02e-45	1.71e-43	270	211	226	624	1486	1419	1399	1059
Col1a2	5025	-1.6	0.11	-14.1	2.2e-45	3.66e-43	2465	2541	2370	1632	7723	7054	7641	8773
Arf3	4261	1.8	0.13	14	1.03e-44	1.7e-42	7115	5838	6989	6074	2060	1829	1980	2202
Grik3	458	-3.6	0.26	-14	1.52e-44	2.48e-42	80	72	78	408	1080	725	1038	183
Prmt8	891	-3.2	0.23	-13.9	4.18e-44	6.75e-42	156	134	160	462	1160	1771	1141	2143
Myh6	1474	3.8	0.27	13.9	4.88e-44	7.8e-42	3927	2496	3746	628	331	109	290	261
Sall4	1353	2.8	0.2	13.9	9.61e-44	1.52e-41	2490	2213	2726	1992	289	467	298	347
Dsg2	675	2.7	0.2	13.9	1.26e-43	1.97e-41	1470	1363	1379	198	206	202	227	352
Acta2	579	3.5	0.26	13.7	5.91e-43	9.18e-41	1040	1123	1025	866	112	58	103	304
Nova2	1402	-2.4	0.18	-13.7	8.11e-43	1.25e-40	485	348	493	1301	2331	2425	2445	1386
Gata6	873	2.5	0.19	13.7	1.6e-42	2.43e-40	1782	1981	1721	270	322	277	337	290
Apc2	702	-3	0.22	-13.7	2e-42	3.01e-40	162	150	168	410	1396	1012	1435	883
Zc3hav1l	9453	1.4	0.1	13.6	3.25e-42	4.87e-40	15144	14867	15471	8626	6003	5595	5786	4135
Dcx	4617	-2.8	0.2	-13.6	4.59e-42	6.8e-40	888	1846	982	2365	8151	8430	8171	6104
Hspd1	16126	1.3	0.1	13.6	5.48e-42	8.05e-40	22479	23068	22858	21963	9263	9311	9058	11005
H2afz	11229	1.5	0.11	13.5	8.3e-42	1.21e-39	17196	15252	16952	16457	5689	6201	5531	6557
Igf2	44572	1.8	0.14	13.5	1.86e-41	2.69e-39	78184	80266	78429	26823	19278	27602	19382	26614
Phf21b	1309	-2.8	0.21	-13.4	4.88e-41	6.97e-39	341	230	378	843	2067	2647	2072	1895
Pkm	8699	1.3	0.1	13.4	8.56e-41	1.21e-38	11849	11767	11592	16180	4600	4626	4586	4390
Nr6a1	2736	2	0.15	13.3	1.36e-40	1.91e-38	4850	3650	4781	4602	1068	1157	1044	738
Ebf2	1612	-2.6	0.2	-13.3	1.54e-40	2.15e-38	373	613	374	1022	2586	3064	2631	2229
Stmn2	908	-3.3	0.25	-13.3	1.66e-40	2.29e-38	223	104	206	459	1700	1723	1773	1075
Rufy3	2855	-1.6	0.12	-13.2	1.42e-39	1.95e-37	1429	1317	1407	2056	4263	4209	4237	3920
Igfbp5	17421	1.5	0.11	13.2	1.5e-39	2.04e-37	32080	26255	31814	8127	10992	9723	10853	9525
Soga3	1127	-2.3	0.18	-13.1	2.56e-39	3.45e-37	377	342	370	678	1859	1535	1955	1904
Scg3	699	-2.8	0.21	-13.1	3.09e-39	4.13e-37	138	126	153	376	1023	821	1034	1921
Kif21a	3473	-1.6	0.12	-13.1	3.44e-39	4.56e-37	1545	1789	1592	2688	5232	4992	5049	4894
Gpx3	1001	2.5	0.19	13.1	5.58e-39	7.34e-37	1852	1658	1905	1330	289	379	272	319
Myrf	1754	2.2	0.17	13	6.57e-39	8.57e-37	3698	2991	3650	574	698	881	726	815
Adgrg1	957	-3.4	0.26	-13	1.09e-38	1.41e-36	112	243	116	965	1632	1607	1608	1370
Ryr2	806	3	0.23	12.9	3.29e-38	4.22e-36	1671	1900	1666	542	276	149	236	9
Emb	1965	1.7	0.13	12.8	1.14e-37	1.46e-35	3242	3249	3285	2124	1003	981	1018	820
Snx12	2235	1.8	0.14	12.8	1.79e-37	2.26e-35	3855	3402	3879	2938	1044	1145	1095	524
Notch1	2487	-1.7	0.13	-12.7	3.5e-37	4.38e-35	1112	1195	1027	3186	3787	3477	3569	2545
Gm6878	349	-3.7	0.29	-12.7	4.7e-37	5.85e-35	45	56	41	182	636	520	654	655
Fgd4	2852	-1.6	0.13	-12.7	6.29e-37	7.77e-35	1177	1296	1251	2231	3742	4166	3632	5319
Frem2	1751	1.8	0.14	12.7	8.59e-37	1.05e-34	3399	3093	3384	764	965	958	976	470
Scrt1	258	-6	0.48	-12.6	3.16e-36	3.85e-34	1	16	7	18	465	507	434	616
Celf3	892	-2.4	0.19	-12.6	3.31e-36	4e-34	315	223	305	698	1607	1404	1564	1016
Epha5	361	-3.8	0.3	-12.5	4.12e-36	4.94e-34	65	37	50	20	832	495	792	601
Pfn1	3005	1.6	0.13	12.5	6.59e-36	7.84e-34	4670	4041	4559	5271	1503	1461	1488	1050
Gm10801	268	4.6	0.37	12.5	1.36e-35	1.61e-33	676	515	588	180	21	38	17	109
H19	11961	1.5	0.12	12.4	2.57e-35	3.01e-33	22218	16831	21924	8110	7369	6474	6966	5796
Gm10748	359	-4.1	0.33	-12.4	4.37e-35	5.09e-33	19	41	28	44	375	735	424	1210
Lepr	308	-3.9	0.32	-12.3	5.72e-35	6.62e-33	29	57	36	129	542	705	561	406
Ppat	3177	1.5	0.12	12.3	6.2e-35	7.12e-33	4453	4643	4439	4845	1605	1651	1653	2125
Ppp1r8	1133	2.4	0.2	12.3	8.59e-35	9.8e-33	2169	1558	2239	1470	325	378	390	536
Cadps	871	-2.4	0.19	-12.3	8.79e-35	9.95e-33	293	347	287	440	1503	1819	1447	835
Myt1l	209	-6.8	0.56	-12.3	1.13e-34	1.27e-32	2	5	3	83	391	340	387	462
Ebf3	5419	-1.9	0.16	-12.3	1.26e-34	1.41e-32	2007	2676	1932	2180	7380	9962	7523	9688
Gm37534	978	-2.1	0.17	-12.3	1.67e-34	1.85e-32	369	354	361	703	1585	1420	1488	1545
Ablim1	946	2.2	0.18	12.2	2.25e-34	2.48e-32	1845	1882	1861	633	355	467	360	165
Sox9	2479	-1.8	0.15	-12.2	2.32e-34	2.54e-32	1153	936	1229	1273	3779	3985	3815	3661
Dock10	689	-2.4	0.2	-12.2	4.32e-34	4.69e-32	195	214	178	142	1088	1012	1028	1658
Vsnl1	481	3.6	0.3	12.2	4.66e-34	5.03e-32	971	1340	981	168	78	132	63	116
Zic4	804	-2.9	0.24	-12.2	4.92e-34	5.28e-32	147	264	165	514	1515	1317	1407	1101
Synpo	901	-2.1	0.18	-12.1	7.63e-34	8.13e-32	342	325	352	327	1585	1375	1487	1412
Wdr46	1478	1.7	0.14	12.1	9.39e-34	9.94e-32	2177	2220	2200	1739	637	663	663	1525
Ank2	5573	-1.6	0.13	-12.1	9.75e-34	1.03e-31	2976	2262	2948	3247	8366	8559	8114	8110
Fat4	9057	-1.5	0.12	-12	5.12e-33	5.36e-31	5381	4463	5380	3908	14814	12608	14986	10917
Celsr3	957	-2.9	0.25	-11.9	1.42e-32	1.48e-30	260	130	269	651	1660	1686	1606	1394
Dkc1	5841	1.3	0.11	11.9	1.69e-32	1.74e-30	7992	8408	7995	8035	3372	3385	3351	4189
Eif5a	6863	1.5	0.13	11.9	1.72e-32	1.76e-30	10877	8585	10961	10226	3573	3582	3527	3573
Gm14226	949	2.2	0.18	11.8	2.29e-32	2.34e-30	1996	1665	2010	17	419	381	453	652
Celsr2	4235	-1.6	0.13	-11.8	3.66e-32	3.71e-30	2164	1901	2240	4837	6787	5425	6526	4000
Setbp1	5390	-1.5	0.13	-11.8	6.28e-32	6.32e-30	2912	2350	2925	2649	7945	7172	7787	9381
Kcnq2	400	-4.4	0.37	-11.7	1.07e-31	1.07e-29	41	15	52	135	675	944	613	722
Robo3	1467	-7.6	0.65	-11.7	1.77e-31	1.76e-29	15	5	25	115	2646	3543	2662	2726
Snap91	352	-3	0.26	-11.6	2.52e-31	2.49e-29	97	77	81	71	772	609	718	390
Rab6b	709	-2.4	0.21	-11.6	4.11e-31	4.04e-29	246	223	228	599	1290	1032	1415	636
Ppp1r14b	442	3	0.26	11.6	4.38e-31	4.27e-29	783	666	871	824	93	116	86	95
Dcp2	7122	1.3	0.11	11.6	4.57e-31	4.44e-29	10142	11262	10058	7456	4236	4516	4264	5045
Hmgcs1	4374	-1.4	0.12	-11.6	5.24e-31	5.05e-29	2521	2217	2454	3590	6521	5751	6383	5553
Unc79	310	-3.4	0.29	-11.6	5.51e-31	5.28e-29	52	68	56	151	646	529	630	349
Onecut2	2358	-1.5	0.13	-11.6	6.49e-31	6.19e-29	1022	1164	1074	3377	3056	3082	3108	2983
Hapln1	2034	2	0.17	11.6	6.95e-31	6.59e-29	2778	3647	2811	3210	710	951	698	1465
Ttyh1	585	-3.1	0.27	-11.5	8.84e-31	8.33e-29	142	102	133	172	902	1519	936	775
Xk	837	-2.7	0.23	-11.5	9.19e-31	8.61e-29	102	190	123	999	878	909	821	2670
Bsg	2234	1.7	0.14	11.5	1.18e-30	1.1e-28	3218	3337	3398	3583	1095	907	1132	1201
Gpm6b	1321	-2.7	0.23	-11.5	2.28e-30	2.11e-28	257	483	241	896	2025	2190	1987	2486
Lzts1	266	-3.7	0.33	-11.4	2.36e-30	2.17e-28	44	29	52	87	549	549	554	264
Nefl	1072	-2.3	0.2	-11.4	2.55e-30	2.34e-28	383	327	382	545	1582	2210	1560	1586
Pklr	290	-6.7	0.58	-11.4	4.97e-30	4.53e-28	1	8	1	799	340	323	315	536
Lama5	716	2.6	0.23	11.3	8.3e-30	7.52e-28	1480	1350	1478	543	199	319	208	150
Ankrd1	180	5	0.44	11.3	9.16e-30	8.25e-28	451	357	410	162	11	7	19	26
Psat1	3746	1.5	0.14	11.3	9.28e-30	8.31e-28	5361	5837	5262	5897	1733	2204	1760	1918
Srrm3	199	-4.3	0.38	-11.3	1.22e-29	1.08e-27	23	16	29	38	479	378	447	181
Cacna1g	979	-1.9	0.17	-11.3	2.23e-29	1.98e-27	445	410	439	758	1548	1733	1602	896
Tbx20	804	2	0.18	11.2	3.73e-29	3.29e-27	1265	1260	1215	1212	314	285	314	566
Ebf1	2199	-2.3	0.21	-11.2	4.05e-29	3.55e-27	595	1031	566	1154	3644	3391	3733	3478
D030025E07Rik	250	3.6	0.32	11.2	4.65e-29	4.06e-27	531	673	608	15	37	68	44	21
Snca	187	-4.7	0.42	-11.1	7.29e-29	6.32e-27	7	11	18	189	248	375	291	359
Zic1	2050	-1.6	0.15	-11.1	8.31e-29	7.17e-27	1085	843	1019	1915	3053	2916	3081	2484
Snap25	465	-2.7	0.25	-11.1	9.74e-29	8.36e-27	105	122	106	321	716	865	639	846
Slc39a8	1586	-1.6	0.15	-11.1	1.1e-28	9.39e-27	479	473	516	2568	1429	1651	1530	4040
Dpysl4	1306	-1.9	0.17	-11.1	1.17e-28	9.97e-27	554	444	569	749	1868	2007	1857	2395
Rrm2	6027	1.2	0.11	11.1	1.27e-28	1.07e-26	7639	8382	7853	8984	3357	3599	3457	4941
Pak3	633	-2.6	0.23	-11.1	1.92e-28	1.62e-26	148	240	167	219	1103	1012	1152	1025
Ptprb	296	-3.6	0.33	-11	4.22e-28	3.53e-26	40	20	39	391	419	396	371	689
Bend3	2735	1.5	0.14	11	5.73e-28	4.76e-26	4103	4788	3937	3527	1502	1382	1553	1089
Pax3	2275	-1.5	0.14	-11	5.92e-28	4.9e-26	940	1127	1077	2728	3146	2878	3025	3279
Ntrk2	941	-2	0.18	-10.9	8.03e-28	6.61e-26	368	407	330	153	1379	1622	1422	1844
Rab11fip1	920	2.3	0.22	10.9	1.32e-27	1.08e-25	1557	1920	1550	751	385	248	358	595
Mab21l2	518	-2.4	0.22	-10.9	1.49e-27	1.21e-25	141	162	134	30	750	869	759	1299
Gm43361	1595	1.6	0.14	10.9	1.52e-27	1.23e-25	2525	2698	2584	1873	871	823	923	462
Pantr1	404	-2.7	0.25	-10.8	2.05e-27	1.65e-25	73	111	94	352	561	678	598	769
Npm1	79311	1.2	0.11	10.8	2.35e-27	1.89e-25	109043	106424	107927	92796	44746	53776	44970	74803
4930402H24Rik	1436	-1.7	0.16	-10.8	2.65e-27	2.11e-25	629	652	614	917	2227	1825	2254	2368
Stard9	970	-1.8	0.17	-10.8	3.7e-27	2.94e-25	486	413	434	652	1585	1638	1546	1006
Npnt	804	2.2	0.21	10.8	4.06e-27	3.21e-25	1652	1503	1768	316	402	272	377	143
Phyhipl	697	-2.1	0.2	-10.8	4.14e-27	3.26e-25	206	239	241	586	908	1176	957	1262
Kitl	772	2	0.18	10.7	6.44e-27	5.05e-25	1191	1352	1239	966	298	343	329	456
Lhx5	186	-5.1	0.47	-10.7	7.24e-27	5.65e-25	12	3	15	36	332	328	357	405
Gm11575	326	-3	0.28	-10.7	8.33e-27	6.47e-25	59	53	55	108	491	384	502	960
Sgk3	764	-2.8	0.26	-10.7	9.48e-27	7.32e-25	101	189	105	564	922	760	965	2508
Gm13394	611	2.6	0.25	10.7	1.15e-26	8.85e-25	585	766	519	2639	111	88	104	76
Gm12064	235	-3.8	0.36	-10.7	1.71e-26	1.31e-24	32	21	44	19	438	436	474	414
Capns1	2465	1.4	0.13	10.6	2.02e-26	1.54e-24	3519	3571	3512	3429	1313	1465	1318	1592
Gata5	186	4	0.38	10.6	3.06e-26	2.32e-24	444	427	432	87	19	37	27	15
Tenm2	569	-2.6	0.25	-10.6	3.14e-26	2.37e-24	137	218	167	167	971	1297	884	714
Lhx1os	172	-7.1	0.67	-10.6	4.95e-26	3.72e-24	1	1	4	6	223	403	254	486
Shroom3	1731	1.6	0.15	10.5	5.56e-26	4.16e-24	3108	2731	3149	1245	896	1086	961	669
Reln	1309	-2.5	0.23	-10.5	6.87e-26	5.12e-24	348	190	380	2026	1850	1368	1790	2519
Lcp1	650	-2.5	0.24	-10.5	7.24e-26	5.36e-24	199	128	227	257	1122	1007	1100	1158
Zc3hav1	481	-3.6	0.35	-10.5	8.2e-26	6.05e-24	46	27	48	845	365	783	400	1335
L1cam	537	-2.3	0.22	-10.5	8.5e-26	6.24e-24	200	174	218	414	985	912	1036	356
Ccdc141	1203	1.7	0.16	10.5	9.78e-26	7.15e-24	1886	2152	1874	1021	595	648	611	837
Asna1	1109	1.8	0.17	10.5	9.97e-26	7.25e-24	1492	1744	1472	2137	484	432	425	689
Bcl11b	259	-3.9	0.37	-10.5	1.45e-25	1.05e-23	23	50	24	18	521	396	508	532
Ell2	1137	-1.9	0.19	-10.4	1.69e-25	1.22e-23	244	325	230	2596	975	1065	1016	2649
6330415B21Rik	250	-4.1	0.4	-10.4	1.72e-25	1.23e-23	15	53	28	80	436	689	441	261
Tnnt2	895	2.9	0.28	10.4	2.05e-25	1.46e-23	1962	1789	1844	678	341	126	311	110
9330159F19Rik	577	-2.2	0.21	-10.4	2.27e-25	1.61e-23	184	212	207	316	1025	849	957	865
Lrrn4	231	3.5	0.34	10.4	2.64e-25	1.87e-23	598	439	544	71	46	35	55	59
Polr2m	4923	1.3	0.12	10.4	3.79e-25	2.67e-23	7908	6692	7969	5072	3023	3219	3033	2471
Ly75	901	2	0.19	10.4	3.93e-25	2.76e-23	1511	1909	1439	775	426	389	401	359
Vim	8582	-1.1	0.11	-10.3	4.86e-25	3.4e-23	4664	5161	4897	10126	10003	11262	10233	12312
Ubxn1	592	2.3	0.22	10.3	5.27e-25	3.67e-23	993	1178	1006	718	238	188	234	178
Flrt3	2969	1.4	0.13	10.3	5.5e-25	3.81e-23	4777	5260	4760	1930	1796	2118	1746	1368
Cdh5	434	-2.8	0.27	-10.3	5.52e-25	3.81e-23	96	76	78	783	501	694	511	738
Spc24	512	2.4	0.23	10.3	5.76e-25	3.96e-23	817	843	917	857	147	200	142	175
Chrna3	974	-2	0.2	-10.3	5.91e-25	4.05e-23	325	445	358	597	1364	1829	1359	1516
Ncam1	2486	-1.4	0.14	-10.3	6.53e-25	4.45e-23	1347	1550	1344	1521	3947	3532	3802	2847
Tmem178b	391	-3.8	0.37	-10.3	6.58e-25	4.47e-23	30	99	33	225	690	755	728	572
Mtap	2229	1.3	0.13	10.3	7.42e-25	5.02e-23	2996	3148	2983	2597	1164	1202	1251	2490
Ctnna2	564	-2.7	0.26	-10.3	8.04e-25	5.41e-23	123	166	120	469	981	653	1015	982
Pou3f4	553	-2.7	0.26	-10.3	9.03e-25	6.06e-23	154	91	173	316	1010	789	928	960
Tcf4	14779	-1.1	0.1	-10.3	9.66e-25	6.45e-23	8999	9983	9079	9386	19963	18833	20176	21814
Kif5c	2911	-1.3	0.12	-10.3	1.01e-24	6.74e-23	1717	1695	1648	2497	4263	3795	4235	3437
Rtn1	1321	-1.5	0.15	-10.3	1.1e-24	7.3e-23	547	570	587	953	1633	1631	1707	2945
Map3k13	855	-2.2	0.21	-10.3	1.12e-24	7.4e-23	260	395	298	475	1532	1283	1438	1157
Rai14	5659	-1.1	0.11	-10.2	1.3e-24	8.53e-23	3610	3634	3516	4391	7529	7786	7680	7123
Gm37606	1748	-1.5	0.14	-10.2	1.41e-24	9.22e-23	814	950	813	605	2339	2482	2373	3609
Ptprc	156	-7.2	0.71	-10.2	1.41e-24	9.22e-23	1	1	3	26	288	279	243	405
Csf1r	239	-3.4	0.33	-10.2	1.44e-24	9.36e-23	37	31	47	92	419	365	415	503
Syt11	1430	-1.7	0.17	-10.2	2.43e-24	1.57e-22	696	581	695	1230	2234	1825	2258	1924
Elavl2	2109	-1.7	0.17	-10.2	2.52e-24	1.62e-22	801	1260	922	1506	3348	3124	3457	2456
Eif1a	3573	1.6	0.16	10.1	3.92e-24	2.52e-22	4907	6137	4963	5246	1906	1499	1971	1956
Sumo3	1032	1.7	0.17	10.1	4.28e-24	2.74e-22	1568	1666	1691	1359	523	459	524	464
Prdm8	348	-2.6	0.25	-10.1	4.92e-24	3.13e-22	98	111	106	136	580	671	620	464
Tox	923	-1.7	0.17	-10.1	5.11e-24	3.24e-22	361	387	367	1667	1164	1267	1248	921
Lbh	751	2	0.2	10.1	5.34e-24	3.38e-22	1518	1142	1462	625	388	299	339	233
Tubb5	19953	1	0.1	10.1	5.99e-24	3.77e-22	27322	25891	27913	26694	13688	13721	13655	10737
Nckap1l	150	-5.4	0.53	-10.1	7.12e-24	4.46e-22	6	5	6	31	197	300	171	488
Nxpe2	324	-3.2	0.32	-10.1	8.78e-24	5.48e-22	49	25	40	506	341	307	375	947
Ywhae	35538	1	0.1	10	1.1e-23	6.86e-22	49453	46130	50228	41322	23490	25519	23553	24605
Rpl10	6128	1.1	0.11	10	1.21e-23	7.49e-22	7740	7472	8304	11771	3522	3770	3597	2847
Alpk3	154	5.4	0.54	10	1.31e-23	8.07e-22	381	341	370	87	4	20	6	20
Cpeb4	1859	-1.6	0.16	-10	1.54e-23	9.48e-22	664	830	698	2381	2451	1968	2416	3463
St8sia2	2187	-1.6	0.16	-10	1.95e-23	1.2e-21	1203	954	1145	977	3134	3766	3004	3312
Tal1	560	-2.7	0.27	-10	2.02e-23	1.23e-21	111	59	122	857	636	637	667	1388
Bex1	742	2	0.2	10	2.25e-23	1.37e-21	1376	1118	1490	686	339	326	330	269
Ctdsp2	2296	1.3	0.13	10	2.45e-23	1.49e-21	3701	3331	3700	2317	1467	1448	1441	963
Gm43120	122	-5.4	0.55	-10	2.48e-23	1.49e-21	6	5	6	3	277	167	248	266
Scn3a	991	-1.7	0.17	-10	2.48e-23	1.49e-21	480	531	445	123	1525	1676	1576	1575
Ssr1	5873	1.1	0.11	9.9	2.72e-23	1.63e-21	7973	8243	8036	8137	3876	3703	3950	3069
Peg10	28648	1	0.1	9.9	2.84e-23	1.69e-21	41815	39739	41792	20980	20671	21928	20551	21704
RP23-330O16.3	327	-3.2	0.32	-9.9	2.86e-23	1.7e-21	49	96	55	149	661	527	640	441
Cyb5r3	2365	1.3	0.13	9.9	3.2e-23	1.9e-21	3389	3346	3209	3489	1407	1366	1389	1324
Has2	1063	1.7	0.17	9.9	3.36e-23	1.99e-21	1758	1926	1763	787	609	521	583	554
Prox1	2075	-1.7	0.17	-9.9	3.89e-23	2.29e-21	1098	713	1042	2242	3071	3042	3101	2292
Cyfip2	2277	-1.3	0.14	-9.9	3.91e-23	2.3e-21	1376	1199	1416	897	3514	3365	3263	3185
Slc14a1	195	-7.8	0.79	-9.9	4.87e-23	2.85e-21	3	0	1	82	265	402	313	491
Rbpms	2166	1.4	0.14	9.9	5.21e-23	3.03e-21	3709	3286	3861	1155	1426	1208	1412	1272
Dctd	1321	1.6	0.16	9.8	7.35e-23	4.26e-21	2181	1949	2171	1769	646	774	680	396
Csf2rb	288	-7.3	0.74	-9.8	8.36e-23	4.83e-21	2	0	2	710	174	360	198	859
Fech	1778	-1.5	0.15	-9.8	9.39e-23	5.39e-21	626	646	569	2930	1625	1857	1620	4352
Kmt5a	5554	1.1	0.11	9.8	9.4e-23	5.39e-21	8011	7302	7972	5841	3710	3638	3666	4289
Has1	224	-3.2	0.32	-9.8	1.04e-22	5.96e-21	45	51	53	47	448	459	405	284
Gm37298	1050	-1.7	0.17	-9.8	1.24e-22	7.06e-21	445	516	432	635	1491	1450	1468	1966
Raver1	4259	1.2	0.12	9.8	1.82e-22	1.04e-20	6275	5645	6040	6312	2778	2387	2767	1865
Khsrp	3092	1.3	0.14	9.7	1.93e-22	1.09e-20	4782	3949	4915	4173	1735	1840	1815	1531
Slc12a2	3170	1.2	0.12	9.7	2.01e-22	1.13e-20	4908	4548	4901	2728	2206	1979	2127	1959
Galnt3	251	3	0.31	9.7	2.03e-22	1.14e-20	587	599	571	30	90	59	69	3
Rbm24	383	2.4	0.24	9.7	2.11e-22	1.18e-20	775	744	722	325	157	133	146	59
Crmp1	1280	-1.9	0.2	-9.7	2.33e-22	1.3e-20	586	383	620	1237	2085	1869	2130	1329
Chrna4	976	-2.2	0.23	-9.7	2.78e-22	1.55e-20	405	242	382	968	1443	1904	1465	997
Fstl5	115	-6.3	0.65	-9.7	2.9e-22	1.61e-20	4	3	2	5	205	317	188	198
Slc25a3	5201	1.1	0.12	9.7	3.5e-22	1.94e-20	6752	7357	6738	7443	2986	3463	3049	3819
Mat2a	9635	1.1	0.12	9.7	3.69e-22	2.03e-20	12478	13777	12573	12796	5519	6713	5622	7601
Grik2	301	-3.1	0.32	-9.7	4.23e-22	2.32e-20	45	86	67	170	624	477	579	362
Hand1	176	4	0.42	9.7	4.78e-22	2.61e-20	350	469	379	81	23	14	35	57
Eif4ebp2	2504	1.3	0.13	9.6	4.93e-22	2.69e-20	3800	3420	3727	3396	1511	1600	1423	1157
Nrxn3	380	-2.6	0.27	-9.6	5.04e-22	2.74e-20	118	87	104	94	573	752	578	738
Haglr	506	-2.6	0.27	-9.6	6.2e-22	3.36e-20	102	189	123	178	651	1106	722	980
Ascl1	818	-2	0.2	-9.6	6.9e-22	3.72e-20	295	309	301	1175	1085	1434	1013	930
Ctse	330	-8.5	0.89	-9.6	8.4e-22	4.52e-20	1	0	2	83	278	452	280	1542
Bgn	674	-1.9	0.2	-9.6	8.46e-22	4.54e-20	241	222	249	479	819	1028	896	1457
Thsd4	1057	1.5	0.16	9.6	1.01e-21	5.38e-20	1902	1769	1885	501	660	599	641	495
Ptpro	147	-4.4	0.46	-9.6	1.07e-21	5.72e-20	9	22	11	68	249	337	261	219
Mecom	3206	-1.1	0.12	-9.6	1.24e-21	6.57e-20	1999	2100	2040	1667	4757	4400	4466	4216
Prr11	3425	1.3	0.14	9.5	1.39e-21	7.36e-20	5378	4906	5475	2927	1909	2417	1940	2445
Ak4	881	2.2	0.23	9.5	1.56e-21	8.21e-20	1525	1204	1474	1540	263	416	274	355
Apela	129	4.5	0.47	9.5	1.57e-21	8.27e-20	330	230	324	110	15	8	15	0
Atp2a2	9825	1.1	0.11	9.5	1.7e-21	8.93e-20	13717	13995	13467	11878	7053	5961	6846	5686
Csrnp3	1995	-1.3	0.14	-9.5	2.22e-21	1.16e-19	1143	1046	1103	1580	2844	2477	2774	2990
Gm42853	280	-2.7	0.29	-9.5	3.08e-21	1.6e-19	73	71	77	135	476	446	513	447
S1pr3	1026	-1.6	0.17	-9.5	3.17e-21	1.65e-19	555	554	532	479	1530	1843	1623	1093
Trim28	5959	1.1	0.11	9.5	3.22e-21	1.67e-19	7994	8948	7947	8222	4000	3814	3996	2753
Gm21738	155	4.3	0.46	9.4	3.52e-21	1.81e-19	365	291	355	97	10	28	16	79
Hspa5	16599	1.3	0.13	9.4	3.74e-21	1.92e-19	20400	27490	20071	26970	9283	9957	9085	9537
Fam78b	872	-1.7	0.18	-9.4	4.16e-21	2.13e-19	365	383	401	400	1210	1426	1161	1634
Mapk1ip1l	8584	1	0.11	9.4	4.22e-21	2.16e-19	11776	12645	11271	8608	5657	6147	5708	6862
Vat1	344	-2.5	0.27	-9.4	4.58e-21	2.33e-19	105	75	85	244	522	477	522	720
Eif2s1	5265	1.2	0.13	9.4	4.94e-21	2.51e-19	7419	7621	7199	6917	3488	2820	3476	3177
Ubfd1	5616	1.4	0.15	9.4	7.04e-21	3.56e-19	9450	8015	9437	5994	3744	2628	3776	1889
Mir99ahg	3651	-1.5	0.16	-9.4	7.21e-21	3.64e-19	1630	2340	1635	2093	5081	4949	5315	6163
Serp1	3176	1.2	0.13	9.4	7.82e-21	3.94e-19	4167	4782	4103	4030	1899	1879	1934	2619
Dvl3	2757	-1.3	0.13	-9.4	8.62e-21	4.32e-19	1710	1492	1686	1340	3742	4185	3735	4167
Ldb3	122	4.8	0.52	9.3	1e-20	5.02e-19	230	315	238	114	10	4	12	50
Seh1l	2887	1.2	0.13	9.3	1.13e-20	5.65e-19	4416	3743	4447	3656	1810	1720	1830	1474
Atoh1	128	-7.1	0.76	-9.3	1.16e-20	5.75e-19	1	5	0	15	267	195	275	267
Bsn	670	-2.6	0.27	-9.3	1.25e-20	6.21e-19	184	100	217	387	1035	827	1055	1554
Strap	6037	1	0.11	9.3	1.32e-20	6.5e-19	7855	8086	7989	6793	4018	4101	4004	5452
Myl7	309	3.5	0.38	9.3	1.45e-20	7.13e-19	616	689	594	380	41	99	34	23
Crb1	230	-3	0.32	-9.3	1.75e-20	8.6e-19	45	47	56	225	413	347	411	293
Laptm5	181	-3.8	0.41	-9.3	1.82e-20	8.91e-19	15	38	20	100	286	388	301	304
Cdkn1c	4457	-1.4	0.15	-9.3	1.91e-20	9.33e-19	2502	1896	2631	2594	5793	6345	5885	8007
Nfib	2091	-1.6	0.17	-9.3	2.07e-20	1.01e-18	1159	807	1202	419	3215	2983	3301	3641
Klf1	213	-5	0.54	-9.3	2.18e-20	1.06e-18	12	0	7	314	179	167	178	850
Pdlim5	1795	1.3	0.14	9.3	2.19e-20	1.06e-18	2718	2652	2813	1647	1088	1185	1049	1207
Myocd	298	2.9	0.31	9.3	2.23e-20	1.07e-18	606	577	574	360	106	48	83	26
Golph3	3366	1.1	0.12	9.2	2.34e-20	1.12e-18	4583	4977	4547	3773	2202	2057	2194	2594
Pax5	177	-3.5	0.37	-9.2	2.37e-20	1.14e-18	31	22	23	56	289	268	276	449
Gpatch4	858	1.9	0.2	9.2	2.43e-20	1.16e-18	1441	1273	1470	992	425	303	427	532
Tmem219	359	-2.4	0.26	-9.2	2.89e-20	1.38e-18	91	91	80	354	473	450	435	896
Cd180	139	-4.9	0.54	-9.2	3.23e-20	1.54e-18	12	4	8	34	188	310	203	350
Pclo	1318	-1.7	0.19	-9.2	3.35e-20	1.59e-18	559	503	533	807	1536	2180	1560	2863
Rasgrp3	1176	1.6	0.17	9.1	5.75e-20	2.71e-18	2074	2252	1855	499	767	602	702	655
Rfx4	2061	-1.2	0.13	-9.1	5.75e-20	2.71e-18	1024	1102	1023	3662	2363	2586	2424	2303
Nucks1	16605	1	0.11	9.1	6.85e-20	3.22e-18	21175	25412	21434	22081	11216	10657	11384	9481
Fat3	6998	-1	0.11	-9.1	7.03e-20	3.29e-18	4776	4657	4569	8010	9050	9413	8837	6676
Adgrf5	425	-2.6	0.29	-9.1	7.85e-20	3.67e-18	105	102	110	256	557	924	514	832
Sod2	1089	1.7	0.19	9.1	8.48e-20	3.95e-18	1696	1477	1904	1465	485	454	594	636
Gm26803	271	-9.8	1.08	-9.1	1.05e-19	4.9e-18	0	0	2	3	642	338	653	529
Gm37040	104	-5.1	0.56	-9.1	1.08e-19	4.99e-18	7	4	7	27	201	163	199	227
Pmp22	1057	1.8	0.2	9.1	1.34e-19	6.17e-18	1618	2218	1713	709	561	443	579	613
Soat1	2684	1.2	0.13	9.1	1.35e-19	6.2e-18	4137	3772	4158	2713	1847	1646	1850	1350
Dtl	8007	1.2	0.13	9.1	1.37e-19	6.3e-18	9872	12635	9656	11380	4721	4840	4703	6252
Gm44435	132	-5.6	0.62	-9.1	1.38e-19	6.33e-18	3	8	2	69	252	125	268	326
Skiv2l2	5240	1	0.11	9	1.49e-19	6.83e-18	7267	7002	7393	5333	3670	3471	3706	4080
Gm44286	248	-3.3	0.36	-9	1.72e-19	7.82e-18	61	23	51	162	433	413	423	421
Pcdh9	299	-3.4	0.37	-9	1.81e-19	8.2e-18	33	92	37	33	538	487	601	572
Psme3	4059	1.3	0.15	9	1.87e-19	8.46e-18	6002	5157	6121	5720	2463	1826	2512	2670
Spaca6	4701	-1.1	0.12	-9	1.93e-19	8.69e-18	3061	3212	3030	1274	6192	7377	6309	7151
Ppia	4071	1.1	0.12	9	2.04e-19	9.17e-18	5133	5681	6118	5133	2235	3011	2580	2676
Lama4	661	-1.7	0.19	-9	2.29e-19	1.03e-17	282	290	272	380	923	949	930	1262
Ntrk3	583	-2	0.22	-9	2.31e-19	1.04e-17	290	209	242	457	1026	815	1022	601
Srm	990	1.5	0.17	9	2.44e-19	1.09e-17	1314	1438	1288	1771	466	483	470	690
Obsl1	1465	1.3	0.15	9	2.46e-19	1.1e-17	2356	2220	2378	1057	937	868	962	942
Map1b	54392	-1	0.11	-9	2.51e-19	1.12e-17	38911	32434	38336	47853	71171	70228	70328	65878
Hoxa9	271	-2.7	0.31	-9	2.99e-19	1.32e-17	69	56	87	0	448	480	492	536
Klf12	964	-1.6	0.18	-8.9	3.59e-19	1.58e-17	486	489	488	400	1607	1271	1604	1368
Kalrn	3510	-1.1	0.12	-8.9	4.12e-19	1.81e-17	2628	2220	2502	1558	5461	4920	5226	3562
Usp53	1132	1.6	0.18	8.9	4.12e-19	1.81e-17	1872	1892	1841	737	682	486	661	882
Alg8	1411	1.3	0.15	8.9	4.14e-19	1.82e-17	2015	2089	2062	1594	787	774	876	1089
Serpinh1	2189	1.2	0.13	8.9	4.5e-19	1.97e-17	3449	3040	3297	1981	1390	1383	1479	1492
Tecr	3490	1.3	0.14	8.9	5.65e-19	2.46e-17	5132	4372	5132	5606	1934	2296	1803	1643
Rhou	1610	1.4	0.16	8.9	6.1e-19	2.65e-17	2716	2085	2588	1497	903	947	919	1228
Adgrv1	7558	-1.2	0.13	-8.9	6.79e-19	2.95e-17	4349	3703	4257	11682	10223	7701	10174	8375
Slc17a6	144	-8.5	0.95	-8.9	8.02e-19	3.47e-17	1	0	1	0	233	494	246	178
Banf1	507	2.1	0.24	8.8	8.91e-19	3.84e-17	954	632	922	801	199	184	185	178
Nbea	5881	-1	0.12	-8.8	1.01e-18	4.33e-17	3735	3736	3688	4467	8051	6800	7835	8738
Set	12264	0.9	0.1	8.8	1.21e-18	5.19e-17	15213	16771	15710	12464	8328	8907	8681	12041
Col6a3	216	-3.1	0.35	-8.8	1.24e-18	5.31e-17	51	41	48	61	436	292	478	323
Cpt1a	151	-3.6	0.41	-8.8	1.28e-18	5.48e-17	26	21	30	10	346	238	344	196
Gm45205	340	2.6	0.3	8.8	1.76e-18	7.51e-17	579	583	592	581	109	64	115	97
A730094K22Rik	98	-7.7	0.88	-8.8	1.81e-18	7.68e-17	1	0	2	10	270	188	262	53
Mir9-3hg	279	-10.7	1.22	-8.8	1.86e-18	7.86e-17	0	0	1	10	513	590	493	624
Ttll6	100	-6	0.69	-8.8	1.92e-18	8.11e-17	4	6	0	23	176	330	184	77
Trim9	690	-2.3	0.27	-8.8	2.01e-18	8.45e-17	254	152	252	449	947	1451	958	1059
Slitrk1	114	-5.5	0.63	-8.7	2.22e-18	9.32e-17	4	10	2	39	306	139	278	131
Hbb-bs	380	-10.6	1.21	-8.7	2.31e-18	9.68e-17	0	0	1	226	443	527	513	1326
Ptch1	9602	0.9	0.1	8.7	2.56e-18	1.07e-16	13622	12323	13401	10645	7068	7078	6844	5838
Trim10	151	-5.3	0.61	-8.7	2.63e-18	1.1e-16	2	4	4	427	157	88	153	376
Mllt4	7109	1	0.11	8.7	2.76e-18	1.15e-16	10290	10251	10281	5493	5473	4931	5541	4611
Ppm1g	2935	1.1	0.13	8.7	2.8e-18	1.16e-16	3995	3544	3968	4871	1818	1748	1823	1713
Zfp949	344	-2.4	0.28	-8.7	2.91e-18	1.2e-16	144	88	123	208	673	542	671	307
Fignl1	1656	1.3	0.15	8.7	3.4e-18	1.4e-16	2612	2044	2478	2090	968	927	949	1178
Zc3h12c	3092	-1.1	0.13	-8.7	4.17e-18	1.72e-16	1962	1776	1924	2855	4212	3681	4118	4212
Myh7	233	2.8	0.32	8.7	4.29e-18	1.76e-16	386	339	380	589	57	44	59	11
Syt1	223	-3.3	0.38	-8.7	4.49e-18	1.84e-16	37	21	53	69	326	425	354	501
Ddx51	868	1.5	0.17	8.7	5.14e-18	2.1e-16	1385	1299	1407	993	483	469	493	415
Slc2a1	4678	1	0.12	8.6	6.19e-18	2.52e-16	5791	5487	6034	9437	2704	3062	2757	2150
Prkci	4133	1.2	0.13	8.6	7.31e-18	2.97e-16	6269	6166	6210	3855	3024	2325	2998	2215
Gm4258	492	-2	0.24	-8.6	8.96e-18	3.64e-16	159	147	205	177	663	777	665	1142
Ldlrad3	3091	1.2	0.14	8.6	1.11e-17	4.5e-16	4293	4595	4503	2721	2027	1686	2151	2750
Kpna2	3601	1.3	0.15	8.6	1.15e-17	4.63e-16	4504	6338	4571	5079	2081	2107	2055	2075
Ldb2	779	-1.8	0.21	-8.5	1.29e-17	5.21e-16	322	448	358	301	1356	1137	1325	983
Tspan12	881	1.6	0.19	8.5	1.32e-17	5.3e-16	1462	1519	1430	907	518	399	525	291
Mir124a-1hg	415	-2.5	0.29	-8.5	1.34e-17	5.38e-16	148	76	145	124	765	571	744	749
Gm37608	119	-10.8	1.26	-8.5	1.54e-17	6.17e-16	0	0	0	3	256	374	252	68
Hoxb9	669	-2	0.23	-8.5	1.93e-17	7.68e-16	376	248	361	5	1336	1065	1388	574
Cacna1b	486	-2.5	0.3	-8.5	2.15e-17	8.56e-16	105	245	123	147	729	1137	794	612
Oxct1	1816	-1.4	0.17	-8.5	2.2e-17	8.74e-16	877	992	914	817	2769	2024	2805	3327
Unc13b	1536	-1.3	0.15	-8.5	2.45e-17	9.71e-16	734	905	751	1598	1861	2135	1925	2377
Ccdc92b	133	-5.4	0.64	-8.4	3.1e-17	1.22e-15	8	1	3	207	175	102	202	364
Gdi1	4879	-1.1	0.13	-8.4	3.32e-17	1.31e-15	3143	3000	3255	4399	5864	7441	6390	5542
Rhag	422	-8.9	1.06	-8.4	3.35e-17	1.32e-15	0	0	2	876	347	231	288	1631
Lpar1	2033	-1.2	0.14	-8.4	3.88e-17	1.52e-15	1451	1179	1374	771	3079	2925	3183	2298
Ccbe1	1055	1.4	0.17	8.4	4.13e-17	1.61e-15	1785	2018	1709	423	695	634	711	468
Lgi2	431	2.4	0.28	8.4	4.25e-17	1.66e-15	915	756	897	255	182	109	206	130
Dclk1	1199	-1.7	0.2	-8.4	4.45e-17	1.73e-15	499	730	464	876	1878	1726	1833	1584
Fbln2	511	-1.9	0.22	-8.4	4.46e-17	1.73e-15	251	194	238	452	911	732	875	439
Mical2	570	1.7	0.21	8.4	4.5e-17	1.74e-15	811	819	755	1052	259	235	219	412
Rian	14560	0.9	0.1	8.4	4.89e-17	1.89e-15	20299	21023	20718	10392	10971	12224	10779	10073
Loxl2	2107	1.4	0.17	8.4	5.09e-17	1.96e-15	3544	3424	3559	1373	1136	1648	1118	1050
Gm37063	480	-1.8	0.22	-8.4	5.16e-17	1.98e-15	192	204	210	310	694	708	754	766
Sbk1	1489	-1.3	0.15	-8.4	5.32e-17	2.04e-15	977	876	971	1042	2310	2082	2367	1287
Lrig3	1515	-1.3	0.15	-8.4	5.39e-17	2.06e-15	869	811	897	995	1942	2300	2023	2282
Hsd3b6	320	-2.9	0.35	-8.4	5.41e-17	2.07e-15	42	77	32	193	387	328	424	1080
Frmd4a	4512	-1.1	0.13	-8.4	5.73e-17	2.18e-15	2713	3135	2628	2865	5711	6320	5597	7128
Zcchc3	2169	1.4	0.17	8.4	6.61e-17	2.51e-15	3542	3550	3408	2025	1162	1665	1149	852
Gm44235	178	-4.4	0.53	-8.4	6.7e-17	2.54e-15	18	27	2	50	308	328	350	341
Nacad	123	-4.1	0.5	-8.4	6.76e-17	2.56e-15	10	28	14	17	311	242	319	44
Atp1a3	160	-4	0.48	-8.3	6.87e-17	2.59e-15	26	8	28	64	387	205	384	181
Podxl	1983	1.5	0.18	8.3	6.86e-17	2.59e-15	3345	2655	3410	1699	972	1368	1033	1379
Zfp827	2296	-1.4	0.17	-8.3	7.21e-17	2.71e-15	1525	1037	1492	746	3503	3669	3400	2998
mt-Rnr1	3152840	1.1	0.13	8.3	7.46e-17	2.79e-15	3991361	5103206	3793673	2467286	1878935	2299465	1905354	3783444
Fgfr2	5194	1.2	0.14	8.3	7.66e-17	2.87e-15	8748	6411	8787	3932	3308	3569	3472	3322
Pou3f2	1792	-1.4	0.17	-8.3	7.83e-17	2.92e-15	794	942	881	2651	2478	1896	2488	2208
Gypc	310	-2.6	0.32	-8.3	8.05e-17	3e-15	69	65	57	513	461	265	457	595
Kif5a	689	-1.7	0.2	-8.3	8.11e-17	3.01e-15	347	309	392	292	1037	1222	1100	814
Col11a1	1993	-1.3	0.16	-8.3	8.8e-17	3.26e-15	1210	1024	1174	1116	2566	3284	2673	2895
Megf10	779	-2	0.25	-8.3	8.99e-17	3.32e-15	219	389	209	938	1098	1164	1081	1137
Fgf1	132	3.7	0.44	8.3	9.34e-17	3.45e-15	270	327	233	20	19	30	18	142
Scn1a	217	-2.8	0.34	-8.3	9.53e-17	3.51e-15	57	54	45	133	387	293	437	329
Foxf1	456	2.1	0.25	8.3	9.72e-17	3.57e-15	915	989	882	81	263	170	238	109
Pak7	178	-3.1	0.37	-8.3	1.07e-16	3.92e-15	39	49	36	69	309	447	309	163
Elavl4	1746	-1.6	0.19	-8.3	1.17e-16	4.29e-15	979	596	990	1531	2563	2625	2584	2104
Dll3	178	-2.9	0.35	-8.3	1.24e-16	4.52e-15	43	45	43	140	301	388	314	148
Arhgap21	6470	-0.9	0.1	-8.3	1.27e-16	4.64e-15	4661	4479	4614	4901	8554	8163	8348	8040
Hnrnpa3	15008	0.8	0.1	8.3	1.29e-16	4.68e-15	19479	20969	20407	10635	11256	11950	11814	13558
Dlk1	1000	1.5	0.18	8.3	1.38e-16	4.99e-15	1628	1600	1707	613	509	694	526	726
Grina	339	-2.2	0.26	-8.3	1.49e-16	5.4e-15	108	128	104	208	507	512	500	642
Ptprz1	1323	-1.4	0.17	-8.2	1.65e-16	5.93e-15	631	579	652	1228	1723	1389	1792	2587
Popdc2	134	3.5	0.42	8.2	1.69e-16	6.08e-15	296	284	243	100	21	25	29	71
Itga6	1774	1.3	0.15	8.2	2.09e-16	7.5e-15	2750	2344	2806	1753	1094	991	1187	1267
Tmsb4x	4129	-1.1	0.14	-8.2	2.14e-16	7.67e-15	2102	2575	2225	4507	4321	6143	4828	6329
Fignl2	678	2.3	0.27	8.2	2.28e-16	8.14e-15	1344	722	1461	757	275	193	268	403
Cdk4	4466	0.9	0.11	8.2	2.33e-16	8.31e-15	5877	5527	5942	6939	2977	2956	3130	2382
Dennd2c	108	-4.3	0.53	-8.2	2.37e-16	8.45e-15	11	6	7	122	165	167	129	255
Gm26871	80	-5.5	0.68	-8.2	2.5e-16	8.89e-15	2	6	2	26	175	153	169	106
Boc	1370	-1.3	0.16	-8.2	2.6e-16	9.21e-15	687	752	707	1583	1721	1891	1602	2016
Tiparp	1402	1.5	0.19	8.2	2.62e-16	9.26e-15	2033	2538	1991	1518	830	624	836	846
Mad2l1	3917	1.3	0.16	8.2	2.63e-16	9.27e-15	4926	7090	4845	5600	2308	2303	2163	2101
Pfkl	940	1.4	0.18	8.2	2.7e-16	9.52e-15	1396	1151	1304	1561	504	420	488	692
Igf2r	8207	0.9	0.11	8.2	2.84e-16	9.97e-15	11817	9990	11756	7025	5985	5884	5791	7406
Cgnl1	1337	2.1	0.26	8.2	3.03e-16	1.06e-14	2735	1964	2732	924	722	317	720	580
Wnk2	729	-1.6	0.2	-8.2	3.08e-16	1.08e-14	320	346	367	617	976	1240	962	1003
Pabpc1	40027	0.9	0.11	8.2	3.14e-16	1.1e-14	52413	45985	51870	55801	28612	24569	28480	32482
Llgl2	108	4.3	0.53	8.2	3.25e-16	1.13e-14	280	157	263	60	19	6	12	71
St8sia4	665	-1.6	0.2	-8.2	3.32e-16	1.15e-14	331	344	286	305	1005	932	1010	1104
Ank3	7675	-0.8	0.1	-8.2	3.47e-16	1.21e-14	5910	5629	5757	3442	10249	10431	10246	9738
Spred2	1834	1.3	0.16	8.1	4.48e-16	1.55e-14	3083	2482	3155	1433	1087	1302	1100	1030
Pip4k2b	1523	1.3	0.16	8.1	4.68e-16	1.62e-14	2330	2137	2340	1937	1031	821	992	593
Barx1	164	3	0.37	8.1	4.73e-16	1.63e-14	408	319	429	8	56	47	39	5
Lhfp	604	-2.6	0.32	-8.1	4.87e-16	1.68e-14	144	231	140	133	1208	586	1267	1125
Adi1	1184	1.3	0.17	8.1	5.79e-16	1.98e-14	1785	1565	1876	1569	687	658	723	612
Wscd1	291	-2.4	0.29	-8.1	5.78e-16	1.98e-14	80	118	86	378	486	476	482	219
Gm38394	354	2.1	0.26	8.1	6.8e-16	2.32e-14	562	701	555	472	123	163	132	127
Col2a1	3898	-1.2	0.15	-8.1	6.97e-16	2.38e-14	2591	2326	2589	2761	5176	6727	5090	3923
Fbxl19	1049	1.6	0.2	8.1	7.09e-16	2.41e-14	1874	1516	1806	967	592	433	659	541
Max	2203	1.4	0.17	8.1	7.25e-16	2.46e-14	3495	2565	3837	2704	1218	1290	1292	1219
Cd248	585	1.8	0.23	8.1	7.3e-16	2.48e-14	1086	852	1043	655	246	324	280	198
Prkaca	1521	1.3	0.16	8.1	7.48e-16	2.53e-14	2350	2174	2543	1502	885	1094	985	637
Snx5	7829	0.9	0.11	8.1	7.53e-16	2.54e-14	9410	10598	9473	9656	5280	5445	5425	7347
Tnc	1674	1.5	0.18	8.1	7.53e-16	2.54e-14	2810	2873	2839	464	1191	747	1131	1335
Kirrel2	174	-9.1	1.13	-8.1	7.85e-16	2.64e-14	0	1	1	26	197	589	200	379
Alad	382	-2.3	0.28	-8.1	8.12e-16	2.72e-14	106	112	97	584	459	660	414	624
Tspan33	212	-3.4	0.42	-8	8.41e-16	2.82e-14	21	12	26	207	156	306	183	782
Ndufs2	1385	1.2	0.15	8	8.61e-16	2.87e-14	1834	1820	1874	2156	748	855	799	995
Tceal8	1878	1.3	0.16	8	1.01e-15	3.35e-14	2462	3245	2506	2456	1159	1059	1134	1007
Ptchd2	205	-2.7	0.34	-8	1.14e-15	3.81e-14	51	46	58	191	309	415	314	252
Acp5	160	-7.5	0.94	-8	1.18e-15	3.92e-14	0	1	2	397	124	239	142	379
Pou3f3	1384	-1.3	0.16	-8	1.24e-15	4.12e-14	672	698	692	1920	1528	1897	1562	2101
Rassf4	808	-1.8	0.23	-8	1.42e-15	4.68e-14	429	256	442	454	1340	1328	1300	917
Arhgap29	2901	1.3	0.16	8	1.42e-15	4.69e-14	4473	4919	4278	1974	1757	2323	1638	1847
Runx1	276	-3.4	0.43	-8	1.47e-15	4.83e-14	22	79	22	164	427	452	395	645
Rgs8	603	-1.6	0.2	-8	1.5e-15	4.94e-14	252	284	255	547	814	840	775	1060
Zfp664	8888	0.9	0.11	8	1.53e-15	5.02e-14	11595	13043	11738	9235	6559	6982	6634	5316
Dsc2	216	2.6	0.32	8	1.56e-15	5.11e-14	420	412	458	165	58	78	83	56
Tspan18	2502	-1.5	0.19	-8	1.57e-15	5.13e-14	1263	1145	1242	2390	2843	4546	2872	3713
Zfp36l1	1637	1.2	0.15	8	1.6e-15	5.23e-14	2351	1990	2321	2720	981	982	981	769
4930438E09Rik	96	-4.1	0.51	-8	1.61e-15	5.25e-14	10	9	15	45	202	183	193	112
Hecw1	207	-2.7	0.34	-8	1.75e-15	5.68e-14	62	67	48	45	420	320	432	261
Pou6f1	173	-3.5	0.44	-8	1.78e-15	5.77e-14	38	14	39	34	292	364	334	272
Npas3	495	-2.1	0.26	-8	1.83e-15	5.92e-14	186	124	211	321	784	630	813	886
Rhoa	2354	1.1	0.14	7.9	1.88e-15	6.06e-14	3263	2915	3387	3020	1516	1440	1567	1722
Nell2	706	-1.7	0.21	-7.9	1.94e-15	6.26e-14	350	238	333	827	997	940	990	971
Pou2f1	5182	0.9	0.11	7.9	1.95e-15	6.28e-14	6750	6592	6690	6041	3784	3350	3679	4571
Mtcl1	1489	-1.2	0.15	-7.9	1.97e-15	6.31e-14	956	842	934	1392	2073	1973	2116	1629
Fhl1	2064	1.1	0.13	7.9	2.12e-15	6.79e-14	2572	2739	2627	3383	1311	1263	1256	1362
Rmst	367	-2.2	0.28	-7.9	2.19e-15	7.02e-14	140	78	113	262	513	471	507	853
Atp2b2	125	-3.8	0.48	-7.9	2.25e-15	7.17e-14	23	10	24	48	294	194	319	86
Ngfrap1	1297	1.3	0.16	7.9	2.33e-15	7.41e-14	1926	1970	1928	1233	729	922	796	870
Cyp1b1	713	2.2	0.27	7.9	2.43e-15	7.73e-14	1292	1580	1253	215	381	180	368	436
Cd59a	439	-2.1	0.26	-7.9	2.47e-15	7.82e-14	143	106	140	381	485	647	498	1113
Hmga2	27759	0.9	0.12	7.9	2.55e-15	8.08e-14	36239	44493	37235	17778	19019	23380	19541	24389
Casd1	4619	0.9	0.11	7.9	2.57e-15	8.1e-14	6186	6560	6063	3918	3332	3488	3290	4118
Trp53	4357	1.3	0.17	7.9	2.6e-15	8.18e-14	6057	6741	6387	5916	2169	3443	2189	1954
Zfhx3	14442	-0.9	0.11	-7.9	2.76e-15	8.68e-14	11076	9187	11119	6750	19412	20019	19138	18838
Itgam	149	-4.2	0.53	-7.9	2.82e-15	8.85e-14	20	10	12	14	179	435	165	355
Fkbp4	4029	0.9	0.12	7.9	2.92e-15	9.16e-14	5093	4962	5233	6372	2735	2419	2757	2661
Lrrc59	4077	1	0.13	7.9	3.37e-15	1.05e-13	5335	5578	5327	6409	2868	2350	2844	1901
F13a1	118	-6.2	0.79	-7.9	3.44e-15	1.07e-13	0	6	3	15	235	85	254	343
Spag9	7453	-0.9	0.11	-7.9	3.56e-15	1.11e-13	4803	5159	4891	7684	9710	8418	9516	9446
Capn6	4117	1	0.12	7.9	3.62e-15	1.13e-13	6263	6126	6023	751	3082	3460	2987	4244
Chd9	6547	-0.9	0.11	-7.9	3.63e-15	1.13e-13	4330	4696	4314	4752	8456	7703	8610	9513
Lamp5	103	-7.5	0.96	-7.9	3.62e-15	1.13e-13	0	2	1	7	175	147	179	314
P4hb	4152	1	0.13	7.9	3.66e-15	1.13e-13	5994	4852	6090	5082	2759	2729	2786	2925
Cfl1	5926	1	0.12	7.9	3.69e-15	1.14e-13	7244	7230	7498	10175	3327	4318	3623	3990
Gm37644	267	-2.4	0.31	-7.8	4.33e-15	1.34e-13	69	104	72	106	394	503	404	483
Dusp9	995	1.5	0.19	7.8	4.86e-15	1.5e-13	1921	1363	1822	490	616	646	545	560
Slc22a15	645	-1.6	0.21	-7.8	4.87e-15	1.5e-13	299	307	257	376	982	762	959	1222
Tbl1x	12257	0.8	0.11	7.8	4.98e-15	1.52e-13	15596	17417	15526	12865	9338	8801	9079	9434
Kif11	6301	1	0.13	7.8	5.07e-15	1.55e-13	7740	9402	7314	8236	4141	3863	4061	5650
Coa5	2718	1	0.13	7.8	5.35e-15	1.63e-13	3407	3628	3358	3176	1638	1860	1588	3085
Rbm15	2773	1.1	0.14	7.8	5.52e-15	1.68e-13	3896	3498	3864	2979	1889	1515	1887	2659
Ccnt1	6134	0.8	0.11	7.8	5.57e-15	1.69e-13	7991	8256	8170	6403	4712	4517	4504	4520
Grm2	80	-5.6	0.72	-7.8	5.73e-15	1.74e-13	4	1	4	31	119	197	119	163
Pawr	517	1.9	0.25	7.8	5.76e-15	1.75e-13	790	957	886	681	257	167	255	139
Cx3cr1	102	-4.6	0.59	-7.8	7.01e-15	2.12e-13	12	7	6	25	144	314	147	163
Atp5k	369	-2.1	0.27	-7.8	7.17e-15	2.16e-13	120	144	129	208	419	774	562	593
Cdh1	497	2.1	0.28	7.8	7.88e-15	2.38e-13	1016	818	1047	245	278	134	246	190
Mbnl1	6979	-0.9	0.11	-7.8	7.97e-15	2.4e-13	3943	4458	3906	6933	7284	7970	7364	13972
Runx2	554	-1.7	0.22	-7.8	8.84e-15	2.65e-13	252	300	274	167	882	1069	793	696
Slitrk6	582	-1.6	0.2	-7.7	1.04e-14	3.12e-13	254	269	274	193	736	849	778	1305
Cdca4	1445	1.3	0.17	7.7	1.05e-14	3.13e-13	1985	1994	1894	2512	769	940	707	758
Fry	717	-1.6	0.21	-7.7	1.05e-14	3.14e-13	418	296	369	339	1058	1158	1029	1066
Trp53i11	2263	-1.2	0.15	-7.7	1.08e-14	3.23e-13	1401	1347	1294	2937	2777	3502	2767	2079
Gm44630	124	-4.8	0.62	-7.7	1.09e-14	3.25e-13	9	0	13	19	224	167	215	347
Mapk6	7736	0.8	0.1	7.7	1.19e-14	3.53e-13	9769	10141	9969	9413	5756	5736	5806	5298
Spock2	603	-1.8	0.23	-7.7	1.19e-14	3.53e-13	231	302	214	478	921	756	854	1071
Zfp329	2249	-1.4	0.18	-7.7	1.19e-14	3.53e-13	1143	1553	1100	1629	3592	2759	3576	2643
Chgb	188	-2.7	0.35	-7.7	1.27e-14	3.76e-13	39	45	47	106	311	242	316	396
Itgb3	423	-2	0.26	-7.7	1.4e-14	4.14e-13	137	111	143	671	580	412	575	757
Rpusd2	597	1.6	0.21	7.7	1.44e-14	4.24e-13	899	970	891	744	284	347	291	347
Yae1d1	1114	1.3	0.17	7.7	1.44e-14	4.24e-13	1533	1586	1547	1452	642	566	697	885
Bend4	3896	1.1	0.14	7.7	1.46e-14	4.29e-13	6057	4652	6060	3815	2688	2657	2680	2558
Slc38a4	2484	1	0.13	7.7	1.52e-14	4.45e-13	3549	3799	3557	1981	1912	1788	1828	1460
Gdf6	252	2.7	0.36	7.7	1.6e-14	4.69e-13	494	656	480	89	56	132	69	42
Gm37925	85	-7.1	0.93	-7.7	1.62e-14	4.72e-13	2	0	1	22	178	99	172	207
Hsd17b10	562	1.7	0.22	7.7	1.62e-14	4.72e-13	830	742	915	1032	256	286	242	195
Gm26930	423	-1.9	0.24	-7.7	1.63e-14	4.72e-13	178	187	179	278	740	552	700	572
Zic5	708	-1.8	0.23	-7.7	1.64e-14	4.77e-13	215	345	210	1166	885	858	908	1074
Ago2	14766	0.9	0.12	7.7	1.69e-14	4.89e-13	22083	17693	22052	13685	10993	10858	11139	9623
Eml5	2782	-1	0.13	-7.7	1.7e-14	4.93e-13	1521	1820	1559	3490	3258	3379	3226	4000
Tnnc1	74	5.3	0.69	7.7	1.79e-14	5.15e-13	177	141	164	94	2	7	4	0
Fam213a	1191	1.4	0.18	7.7	1.83e-14	5.26e-13	1995	1597	2114	1182	661	810	695	476
Odc1	3705	0.9	0.12	7.7	1.99e-14	5.71e-13	4562	4751	4596	5593	2402	2643	2405	2690
Pdzrn4	135	-3.8	0.49	-7.6	2.03e-14	5.82e-13	18	18	25	27	385	142	339	128
Hoxa13	116	-8.6	1.13	-7.6	2.15e-14	6.17e-13	0	1	1	0	192	321	202	213
Spire1	3386	-0.9	0.12	-7.6	2.17e-14	6.2e-13	2215	2178	2057	3352	4140	3851	4249	5047
Bin2	136	-3.6	0.47	-7.6	2.19e-14	6.26e-13	15	18	17	124	132	324	166	288
Dnm3	356	-2.2	0.28	-7.6	2.24e-14	6.38e-13	169	105	143	136	666	484	703	442
Gm27209	86	-5.6	0.73	-7.6	2.27e-14	6.45e-13	4	1	9	4	288	93	259	30
Celf2	2517	-1.1	0.14	-7.6	2.67e-14	7.59e-13	1451	1814	1442	2318	3224	3365	3313	3211
Fyb	155	-9.5	1.24	-7.6	2.71e-14	7.69e-13	1	0	0	10	217	251	216	545
Ap3b2	235	-2.5	0.32	-7.6	2.83e-14	8.02e-13	61	49	56	70	347	239	334	719
Ucp2	734	-1.5	0.2	-7.6	2.94e-14	8.29e-13	298	323	269	1830	858	762	867	663
Fras1	3165	1.1	0.15	7.6	2.97e-14	8.37e-13	5192	5063	5046	1243	2559	1816	2537	1864
Mettl21c	252	2.4	0.32	7.6	3.04e-14	8.55e-13	424	371	472	273	103	69	72	233
Zeb2	9169	-0.8	0.11	-7.6	3.12e-14	8.78e-13	6036	6694	5900	10345	10708	11233	10860	11580
Trim55	98	4.7	0.61	7.6	3.15e-14	8.84e-13	144	336	159	113	9	3	12	11
Ednrb	2157	-1.2	0.16	-7.6	3.3e-14	9.24e-13	1167	1057	1173	2683	2789	2133	2937	3313
Gm20515	151	-3.9	0.51	-7.6	3.64e-14	1.02e-12	19	5	24	26	218	266	199	449
Col9a1	623	-1.5	0.2	-7.6	3.71e-14	1.04e-12	355	282	317	397	972	831	974	858
Ncl	52732	0.7	0.1	7.6	3.77e-14	1.05e-12	60543	67440	60354	53613	37316	38015	36781	67791
Hba-a2	95	-7.5	0.99	-7.6	4.26e-14	1.19e-12	0	0	3	59	104	207	172	216
Sfr1	1778	1.1	0.15	7.5	4.63e-14	1.28e-12	2425	2559	2399	2351	1146	997	1231	1113
Sp1	6060	0.8	0.11	7.5	4.65e-14	1.29e-12	7773	8204	7623	7062	4563	4199	4490	4564
Enc1	1595	-1.8	0.24	-7.5	4.72e-14	1.31e-12	767	494	874	829	3119	1629	2911	2135
Map7d1	1476	-1.1	0.14	-7.5	5.16e-14	1.43e-12	966	981	989	954	2102	2050	2042	1720
Cyc1	1233	1.2	0.16	7.5	5.28e-14	1.46e-12	1694	1603	1750	2133	742	641	773	530
Cd2ap	4815	1.1	0.14	7.5	5.28e-14	1.46e-12	5846	7958	6056	4844	3213	3201	3114	4289
Rlim	7895	0.9	0.11	7.5	5.45e-14	1.5e-12	10373	10659	10009	8322	6020	5146	5986	6646
Atp5b	33478	0.9	0.12	7.5	5.6e-14	1.54e-12	36887	44471	36152	63835	18792	23638	18970	25081
Rpa1	1344	1.1	0.15	7.5	5.8e-14	1.59e-12	1902	1815	1860	1822	841	869	866	775
Rest	4768	0.8	0.11	7.5	6.06e-14	1.66e-12	6806	6284	6518	4387	3779	3497	3727	3150
9830144P21Rik	322	2.4	0.32	7.5	6.11e-14	1.66e-12	601	420	624	493	95	137	74	131
Elf2	3468	1.1	0.15	7.5	6.1e-14	1.66e-12	5231	4077	5522	3407	2386	2160	2389	2570
Eri1	2656	1	0.13	7.5	6.19e-14	1.68e-12	3467	3583	3770	3526	1750	2023	1825	1308
Zbtb39	1354	1.3	0.17	7.5	6.22e-14	1.69e-12	2172	1814	2200	1653	917	719	913	444
Synj1	1707	-1.1	0.15	-7.5	6.51e-14	1.77e-12	1055	866	1039	1166	2188	2048	2156	3138
Rfwd3	2345	1.2	0.15	7.5	6.61e-14	1.79e-12	2762	3627	2812	3346	1422	1409	1295	2090
Hspa12a	921	-1.4	0.19	-7.5	6.94e-14	1.88e-12	482	489	513	464	1234	1617	1177	1391
Xkr4	89	-5	0.66	-7.5	7.02e-14	1.89e-12	4	5	3	40	94	221	91	254
Prrx1	4975	-0.8	0.11	-7.5	8.04e-14	2.17e-12	3811	3685	3840	2030	6896	6382	7089	6068
Col12a1	1469	-1.1	0.15	-7.5	8.38e-14	2.26e-12	1011	962	949	329	2245	1897	2151	2206
Ttc28	2714	-0.9	0.13	-7.5	8.47e-14	2.28e-12	1844	1818	2007	1663	3544	3766	3563	3508
Jakmip2	756	-1.6	0.21	-7.5	8.95e-14	2.4e-12	391	338	367	698	1157	848	1221	1030
Redrum	113	-6.2	0.83	-7.4	9.59e-14	2.57e-12	4	0	1	216	106	185	89	301
Dars	2525	1	0.14	7.4	9.64e-14	2.58e-12	3184	3359	3173	3307	1699	1438	1689	2350
Pmf1	603	1.6	0.21	7.4	9.87e-14	2.63e-12	889	763	984	1076	299	290	296	224
Nectin2	656	1.7	0.23	7.4	1.04e-13	2.77e-12	1180	862	1143	612	396	252	351	453
Astn1	911	-1.6	0.21	-7.4	1.07e-13	2.84e-12	415	549	374	618	1244	1625	1182	1279
Rpl18a	3709	1	0.13	7.4	1.07e-13	2.84e-12	5000	4180	5012	6192	2388	2483	2439	1980
Tuba1b	4467	1	0.13	7.4	1.11e-13	2.95e-12	5415	5572	5900	6653	2425	3405	2944	3419
Stxbp5l	255	-2.7	0.37	-7.4	1.12e-13	2.96e-12	87	31	66	321	432	303	439	364
Ptp4a1	2061	1	0.14	7.4	1.3e-13	3.44e-12	2823	2759	2781	2371	1405	1477	1300	1569
Fbl	834	1.5	0.2	7.4	1.3e-13	3.44e-12	1361	1120	1416	1093	501	399	510	269
Vcp	2454	1	0.14	7.4	1.38e-13	3.62e-12	3553	3111	3709	2770	1686	1563	1795	1447
Sfi1	758	-1.4	0.19	-7.4	1.4e-13	3.67e-12	380	432	377	478	961	1162	1017	1259
Stx3	363	2	0.27	7.4	1.4e-13	3.67e-12	542	869	589	271	140	190	170	133
Pax7	287	-2.3	0.31	-7.4	1.45e-13	3.81e-12	78	78	108	343	453	345	455	432
Dctpp1	242	2.9	0.4	7.4	1.47e-13	3.83e-12	315	447	353	626	67	23	57	50
Wnt2	102	3.6	0.49	7.4	1.55e-13	4.05e-12	191	296	237	27	24	20	16	5
Mapk8ip2	260	-2.2	0.3	-7.4	1.56e-13	4.07e-12	83	105	83	404	418	381	444	160
Wee1	2039	1.1	0.15	7.4	1.58e-13	4.12e-12	2634	2954	2699	2589	1370	1141	1379	1542
Tgfbi	604	-1.6	0.22	-7.4	1.66e-13	4.31e-12	292	345	280	226	826	1140	873	855
Sf1	8707	0.8	0.11	7.4	1.71e-13	4.45e-12	12384	10466	12288	9993	6586	6644	6469	4831
Gm43864	89	-5.9	0.8	-7.4	1.84e-13	4.77e-12	3	0	2	117	108	86	96	298
Fzd7	4214	1.4	0.19	7.4	1.86e-13	4.81e-12	6628	6143	6396	4922	2898	1569	2880	2276
Asxl3	3045	-0.9	0.12	-7.4	1.9e-13	4.91e-12	2177	2143	2202	1709	4005	3937	3994	4191
Fendrr	719	2.1	0.28	7.4	1.92e-13	4.94e-12	1467	1396	1361	52	268	521	229	458
Arid3a	1943	1.4	0.19	7.4	1.95e-13	5.02e-12	3136	2130	3380	2337	1098	1058	1193	1210
Rab6a	3903	0.9	0.12	7.4	1.97e-13	5.07e-12	5017	5612	5081	4106	2690	3055	2707	2954
Foxi2	83	8.5	1.16	7.3	2.03e-13	5.2e-12	209	238	204	9	0	0	1	2
Ubald1	525	1.8	0.25	7.3	2.05e-13	5.26e-12	963	708	991	691	227	302	226	94
Eno1b	439	1.7	0.23	7.3	2.07e-13	5.31e-12	576	657	649	965	195	197	197	74
Cacng4	505	-1.7	0.24	-7.3	2.16e-13	5.51e-12	235	171	214	496	699	759	590	879
Srsf7	8362	0.7	0.1	7.3	2.3e-13	5.86e-12	9873	10323	9978	12654	6022	6042	5888	6113
Cyp26b1	947	-1.3	0.18	-7.3	2.3e-13	5.86e-12	541	536	599	666	1461	1226	1490	1056
Cct6a	14290	0.9	0.12	7.3	2.36e-13	6.01e-12	17599	18885	18032	18502	8752	11553	8980	12018
Tcf7	564	1.5	0.21	7.3	2.44e-13	6.19e-12	868	836	943	656	319	279	315	298
Pbx1	23899	0.7	0.1	7.3	2.48e-13	6.29e-12	32317	34757	32487	16530	19706	21092	19509	14797
Map1a	2075	-1.1	0.15	-7.3	2.5e-13	6.34e-12	1307	1313	1263	1604	2602	3124	2488	2903
Rhob	1430	1.7	0.23	7.3	2.54e-13	6.43e-12	2576	1867	2659	1241	619	1026	612	841
Mybl1	1539	-1.4	0.19	-7.3	2.66e-13	6.72e-12	698	1065	655	1081	2133	2190	2119	2368
Npr3	745	1.4	0.2	7.3	2.85e-13	7.19e-12	1037	1166	1020	725	412	435	355	808
Rbfox3	188	-3	0.42	-7.3	2.87e-13	7.23e-12	42	26	69	105	396	309	426	134
Ythdc1	6170	0.8	0.12	7.3	2.96e-13	7.43e-12	7395	8579	7458	7142	4359	4459	4221	5745
1700039E22Rik	65	-6.3	0.87	-7.3	3e-13	7.53e-12	1	1	2	20	87	183	109	113
Clvs1	250	-2.3	0.32	-7.3	3.16e-13	7.9e-12	88	60	102	136	419	425	426	344
AI506816	2706	0.9	0.13	7.3	3.37e-13	8.42e-12	3314	3229	3045	3697	1660	1774	1573	3359
Slit2	4675	-0.9	0.12	-7.3	3.45e-13	8.61e-12	3246	3525	3104	2696	6405	5599	6414	6411
Akap9	16715	-0.7	0.1	-7.3	3.54e-13	8.83e-12	12496	12150	12898	10597	20637	20076	20682	24182
Myo1f	89	-4.5	0.61	-7.3	3.56e-13	8.85e-12	9	12	3	10	148	268	130	130
Syn1	225	-2.3	0.32	-7.3	3.6e-13	8.94e-12	72	61	64	171	337	344	282	470
Eef1d	2074	1	0.13	7.3	3.79e-13	9.39e-12	2427	2740	2552	3774	1274	1372	1312	1140
Agps	8385	0.8	0.11	7.3	3.9e-13	9.66e-12	10392	12085	10370	9900	6192	6204	6279	5657
Itpkb	619	-1.6	0.22	-7.3	3.96e-13	9.79e-12	290	406	296	368	944	1052	951	642
Mpo	95	-5.5	0.76	-7.3	4.01e-13	9.91e-12	4	0	3	4	85	146	86	430
Gm43508	347	-1.9	0.26	-7.3	4.05e-13	9.99e-12	116	146	138	145	507	524	456	741
Cdk6	7436	1	0.13	7.3	4.15e-13	1.02e-11	11230	9393	11087	5709	5026	6172	5039	5829
Hoxc6	220	-2.2	0.31	-7.2	4.62e-13	1.14e-11	86	92	86	21	379	453	407	240
Gm37082	620	-1.5	0.21	-7.2	4.77e-13	1.17e-11	322	260	288	262	783	879	790	1373
Tomm20	1404	1.1	0.15	7.2	5.01e-13	1.23e-11	2125	1840	2100	1383	906	981	916	980
Golga7	2714	0.9	0.12	7.2	5.16e-13	1.26e-11	3556	3847	3625	2912	1915	2053	1996	1809
Ddx3x	21320	0.9	0.12	7.2	5.2e-13	1.27e-11	26730	29036	26715	27170	16184	13057	16204	15467
Bmp2k	1320	-1.2	0.17	-7.2	5.36e-13	1.31e-11	636	717	594	1697	1622	1328	1577	2392
Idh3b	1911	1	0.14	7.2	5.51e-13	1.34e-11	2407	2279	2386	3151	1130	1267	1135	1533
Zwint	2412	0.9	0.13	7.2	6.16e-13	1.5e-11	3108	3396	3075	2971	1676	1714	1620	1737
Gm15800	3925	-1.1	0.15	-7.2	6.31e-13	1.53e-11	2835	2013	2899	2500	5559	5456	5440	4700
Sox2	750	-1.3	0.18	-7.2	6.39e-13	1.55e-11	432	406	401	701	1017	1090	996	960
Spry1	223	2.2	0.31	7.2	6.46e-13	1.57e-11	436	347	414	130	86	79	86	201
Ssrp1	5114	0.8	0.12	7.2	6.5e-13	1.57e-11	6511	6882	6645	6237	3831	3500	3956	3354
Gyg	1169	1.2	0.16	7.2	6.56e-13	1.58e-11	1651	1793	1717	1057	772	711	828	826
Mcm7	2607	0.9	0.13	7.2	6.96e-13	1.68e-11	3538	3127	3523	3858	1777	1845	1690	1501
Ppp2r2a	3932	1	0.14	7.2	7.41e-13	1.78e-11	5065	5697	5156	4958	2927	2333	2842	2474
Scn3b	78	-5.2	0.73	-7.2	7.64e-13	1.84e-11	1	7	3	19	95	255	84	157
Kcnq1ot1	23110	-0.9	0.12	-7.2	7.79e-13	1.87e-11	13994	17134	13647	16576	25635	29829	25909	42156
Ndfip1	687	1.9	0.26	7.2	8.18e-13	1.96e-11	1106	1048	1240	838	361	190	377	338
Cd36	172	2.6	0.37	7.2	8.64e-13	2.07e-11	366	420	331	57	66	45	68	21
Utp15	1813	1.2	0.16	7.1	8.69e-13	2.08e-11	2688	2189	2746	1788	1014	1280	1086	1717
Abca9	361	-2.1	0.29	-7.1	8.97e-13	2.14e-11	112	154	121	542	588	408	629	337
Slc22a4	105	-6.8	0.96	-7.1	9.25e-13	2.2e-11	0	2	1	87	109	103	94	445
Vamp3	3069	1.1	0.16	7.1	9.52e-13	2.27e-11	3682	4740	3639	3627	1988	1591	1938	3345
Adra2b	86	-5.7	0.81	-7.1	1.05e-12	2.5e-11	0	6	1	196	92	139	85	169
Pou4f1	448	-2.1	0.3	-7.1	1.09e-12	2.58e-11	213	96	206	110	763	743	707	746
Tmem248	1082	1.3	0.18	7.1	1.2e-12	2.84e-11	1537	1320	1571	1595	577	695	579	779
Nemp1	1199	1.1	0.16	7.1	1.21e-12	2.87e-11	1775	1576	1753	1249	755	803	783	900
Arf4	6145	1.1	0.15	7.1	1.23e-12	2.9e-11	7494	10570	7482	7338	4138	3844	4235	4062
Efna5	1948	1	0.14	7.1	1.27e-12	3e-11	2835	2579	2870	1947	1407	1345	1453	1151
Mertk	700	-1.5	0.21	-7.1	1.32e-12	3.11e-11	378	292	412	334	1069	917	1116	1078
Lin7a	395	-1.9	0.27	-7.1	1.4e-12	3.28e-11	174	173	173	143	552	876	567	503
Rnf150	1811	-1	0.14	-7.1	1.46e-12	3.44e-11	1202	1252	1220	691	2243	2643	2403	2835
Hoxa5	1241	-1.4	0.19	-7.1	1.5e-12	3.52e-11	776	702	769	93	1611	2448	1746	1787
Cybb	93	-8.2	1.17	-7.1	1.64e-12	3.85e-11	0	0	2	7	229	89	239	180
Gdap1	309	-2.1	0.3	-7.1	1.74e-12	4.06e-11	113	88	126	184	515	364	521	560
Moxd1	339	-1.9	0.26	-7.1	1.75e-12	4.1e-11	160	131	155	326	603	454	553	328
Fam84b	554	1.7	0.25	7.1	1.78e-12	4.15e-11	950	634	905	680	248	208	285	519
Fndc3c1	8624	0.9	0.13	7	1.79e-12	4.17e-11	10883	13045	10940	8195	5628	7248	5870	7182
Zic2	288	-2	0.29	-7	1.81e-12	4.21e-11	83	106	105	389	354	503	360	405
Mrpl44	167	2.7	0.38	7	1.84e-12	4.26e-11	241	348	257	176	34	59	42	181
Gm38071	575	-1.6	0.23	-7	1.85e-12	4.3e-11	238	282	224	278	636	985	729	1231
Scn8a	1034	-1.3	0.19	-7	1.86e-12	4.31e-11	518	504	473	665	1149	1552	1126	2285
Tcaf1	3153	-0.8	0.12	-7	1.86e-12	4.31e-11	2315	2232	2223	2251	3995	4001	4048	4159
Meox1	780	1.5	0.21	7	1.92e-12	4.43e-11	1309	951	1293	1214	463	354	457	202
Eef1g	5417	0.8	0.12	7	1.95e-12	4.49e-11	6445	7179	6631	8342	3748	3508	4083	3404
2310022B05Rik	668	1.4	0.2	7	1.95e-12	4.49e-11	1095	928	1058	856	352	429	358	267
Fam60a	2211	1.3	0.19	7	1.98e-12	4.56e-11	3124	3508	3071	2922	1507	930	1482	1140
Pf4	65	-9.3	1.32	-7	2.17e-12	4.99e-11	0	0	0	41	90	99	124	163
Psd3	2317	-1	0.15	-7	2.22e-12	5.08e-11	1656	1361	1774	1015	3283	3229	3265	2955
Gm37310	253	-2.5	0.35	-7	2.23e-12	5.1e-11	53	112	72	96	486	357	446	405
Gm42508	506	-1.6	0.22	-7	2.26e-12	5.16e-11	274	286	296	403	885	729	902	276
Elf1	685	-1.4	0.2	-7	2.31e-12	5.28e-11	327	372	303	490	875	974	828	1314
Esrp1	422	2.3	0.32	7	2.39e-12	5.45e-11	918	799	903	129	229	92	231	74
Hk2	1834	1.3	0.19	7	2.52e-12	5.75e-11	2979	2150	2950	2199	1156	810	1227	1201
Foxi3	68	8.2	1.17	7	2.58e-12	5.86e-11	219	105	210	4	1	0	1	0
Mast1	93	-3.7	0.52	-7	2.63e-12	5.98e-11	16	17	10	44	159	239	151	109
Treml2	153	-3.3	0.48	-7	2.87e-12	6.52e-11	15	26	8	231	185	126	183	453
Rpl10a	3753	1	0.14	7	2.89e-12	6.54e-11	4060	5042	4594	6355	1891	2884	2227	2972
Cox15	1277	1.1	0.16	7	2.93e-12	6.62e-11	1665	1746	1658	1731	799	699	839	1075
Atp8a1	1783	-1	0.14	-7	2.94e-12	6.64e-11	1047	1069	1050	2133	2240	1914	2170	2637
Numbl	550	-1.5	0.21	-7	2.97e-12	6.7e-11	306	253	295	618	881	701	813	536
Tox3	2445	-1	0.14	-7	2.97e-12	6.7e-11	1422	1764	1398	2500	2864	3293	3012	3307
Kank2	1977	0.9	0.14	7	3.1e-12	6.97e-11	3121	2872	3199	1044	1584	1590	1610	799
Dag1	3307	0.8	0.12	7	3.14e-12	7.05e-11	4319	4569	4452	3968	2508	2543	2540	1554
Fam65b	211	-3	0.43	-7	3.44e-12	7.72e-11	66	23	76	68	436	351	488	184
Kcnk10	81	-8.1	1.17	-7	3.52e-12	7.88e-11	0	2	0	15	190	106	211	125
Acp1	1047	1.3	0.19	7	3.56e-12	7.96e-11	1536	1192	1491	1630	488	631	567	844
Itgb8	2334	-1.2	0.17	-7	3.6e-12	8.03e-11	1126	1617	1071	3671	2824	2956	2849	2560
Ccdc43	667	1.4	0.2	6.9	3.79e-12	8.44e-11	981	971	989	870	332	422	391	382
Peg3	78421	0.7	0.1	6.9	3.79e-12	8.44e-11	114840	98779	114484	29006	67650	66680	66382	69551
Ptp4a2	7794	0.8	0.11	6.9	3.8e-12	8.45e-11	9778	9535	10268	8278	5942	5276	6017	7256
Rps15	2402	0.9	0.13	6.9	3.84e-12	8.52e-11	2854	3042	3002	4586	1495	1730	1540	968
Ppox	482	-1.8	0.26	-6.9	3.88e-12	8.61e-11	257	142	203	625	664	721	644	604
Adgrg6	279	-2.6	0.38	-6.9	3.94e-12	8.74e-11	55	124	54	301	549	374	493	287
Krt18	208	2.7	0.39	6.9	4.06e-12	8.99e-11	325	438	346	109	79	31	61	273
mt-Nd3	63	-9.2	1.33	-6.9	4.15e-12	9.16e-11	0	0	0	0	80	130	93	202
Gm14303	315	-2	0.3	-6.9	4.16e-12	9.18e-11	86	133	106	153	353	603	393	695
Gm42783	156	-2.8	0.41	-6.9	4.18e-12	9.2e-11	37	26	39	62	277	168	277	361
3110035E14Rik	136	-4.9	0.71	-6.9	4.28e-12	9.43e-11	2	29	1	26	228	340	223	237
A130050O07Rik	422	-1.6	0.23	-6.9	4.39e-12	9.64e-11	184	183	171	282	543	529	563	921
Gabrp	65	-6.1	0.89	-6.9	4.53e-12	9.94e-11	1	2	2	0	85	160	76	196
Mybbp1a	4580	1	0.14	6.9	4.6e-12	1.01e-10	6108	6183	5891	5949	2744	3736	2856	3170
Otud7b	2616	0.9	0.13	6.9	4.98e-12	1.09e-10	3446	3626	3365	2934	1988	1671	1879	2019
Aftph	1345	-1.1	0.15	-6.9	5.67e-12	1.24e-10	712	863	773	1383	1647	1621	1642	2120
Pdk1	1196	1.4	0.21	6.9	5.76e-12	1.26e-10	1665	1714	1640	1620	663	436	752	1078
Gm28119	79	-4.4	0.63	-6.9	5.82e-12	1.27e-10	9	5	8	4	166	75	187	175
Tmpo	8073	0.7	0.1	6.9	5.89e-12	1.28e-10	10192	10302	9769	9528	6244	5916	6261	6368
Neat1	472	-1.6	0.24	-6.9	6.42e-12	1.4e-10	279	189	259	232	797	684	739	601
Cbx2	1435	1.2	0.17	6.9	6.5e-12	1.41e-10	2215	1667	2250	1691	987	818	918	930
Bbx	6647	1.1	0.15	6.9	7.02e-12	1.52e-10	8533	11923	8252	5769	4886	4302	4637	4872
Mras	200	-2.2	0.32	-6.9	7.03e-12	1.52e-10	75	77	73	89	370	313	368	239
Nphs1	121	-4.6	0.67	-6.8	7.5e-12	1.62e-10	7	0	17	11	147	279	159	347
Rdh10	621	1.5	0.22	6.8	7.56e-12	1.63e-10	964	1322	949	345	390	360	376	258
Dusp8	132	-2.9	0.42	-6.8	7.68e-12	1.66e-10	45	29	46	36	330	228	319	23
Gm44438	190	-4.3	0.63	-6.8	7.76e-12	1.67e-10	4	55	8	173	352	330	347	254
Hjurp	4889	0.9	0.13	6.8	7.84e-12	1.69e-10	6848	5715	6909	5915	3503	3711	3525	2986
Kcnn4	99	-6.7	0.98	-6.8	7.97e-12	1.71e-10	1	0	2	131	70	147	74	365
Cdk9	504	1.5	0.22	6.8	8.16e-12	1.75e-10	802	678	743	808	233	283	255	233
Zfp422	3703	0.9	0.13	6.8	8.15e-12	1.75e-10	4649	5151	4674	3912	2480	2953	2497	3307
Slain1os	173	-2.4	0.35	-6.8	8.2e-12	1.75e-10	69	63	55	162	326	331	306	74
Ikbkb	1623	-1.1	0.16	-6.8	8.22e-12	1.76e-10	1030	1140	988	1359	2082	2595	2065	1725
Hs3st3b1	1201	1.3	0.19	6.8	8.32e-12	1.78e-10	2056	1622	2072	843	904	621	845	645
Gm14824	147	-2.7	0.4	-6.8	8.41e-12	1.79e-10	32	27	34	71	205	177	222	411
Pear1	135	-3.4	0.5	-6.8	8.71e-12	1.85e-10	19	31	9	158	177	296	180	210
Mcm5	2261	0.9	0.13	6.8	8.82e-12	1.87e-10	2850	2644	2751	3985	1495	1477	1513	1377
Eya4	971	-1.4	0.2	-6.8	8.98e-12	1.91e-10	580	408	592	615	1471	1167	1478	1459
Ankrd12	2394	-0.9	0.13	-6.8	9.05e-12	1.92e-10	1559	1760	1607	883	3054	3178	2932	4183
Usp29	3031	0.9	0.14	6.8	9.32e-12	1.97e-10	4715	4062	4792	1307	2415	2105	2537	2314
Aldoa	3115	1	0.15	6.8	9.67e-12	2.05e-10	3946	3767	3842	5499	1691	2305	1725	2146
Hnrnph3	3920	-0.8	0.12	-6.8	1.02e-11	2.14e-10	2708	3030	2739	2714	4967	4856	4962	5385
Galc	882	1.2	0.18	6.8	1.04e-11	2.2e-10	1482	1221	1394	763	528	597	600	471
Gm10558	268	-2.5	0.37	-6.8	1.08e-11	2.27e-10	55	89	48	106	274	552	286	737
Sobp	848	-1.5	0.23	-6.8	1.11e-11	2.34e-10	344	541	313	370	1088	1219	1151	1756
Hsf1	1248	1	0.15	6.8	1.12e-11	2.35e-10	1706	1597	1757	1624	829	830	795	844
Ebna1bp2	1153	1.3	0.19	6.8	1.13e-11	2.38e-10	1428	1599	1524	2091	544	803	558	674
Scmh1	2324	-0.9	0.13	-6.8	1.13e-11	2.38e-10	1768	1735	1716	1433	3166	3334	3063	2374
Ajuba	587	1.5	0.22	6.8	1.14e-11	2.39e-10	995	842	993	624	327	276	383	255
Gm16701	95	-4	0.58	-6.8	1.17e-11	2.44e-10	9	23	13	23	267	122	293	9
Rps2-ps13	92	4.3	0.63	6.8	1.18e-11	2.46e-10	95	131	99	383	9	1	6	11
Nadk2	1778	1	0.15	6.8	1.21e-11	2.53e-10	2160	2378	2112	2803	1188	973	1120	1491
Sycp2l	73	4	0.58	6.8	1.21e-11	2.53e-10	187	146	165	57	14	6	12	0
Ctxn3	69	7.9	1.17	6.8	1.25e-11	2.6e-10	200	113	178	10	0	3	0	45
Arf6	1699	0.9	0.14	6.8	1.25e-11	2.61e-10	2158	2216	2124	2363	1157	1101	1134	1343
Atp6v0a1	1349	-1	0.15	-6.8	1.29e-11	2.67e-10	891	799	922	1319	1771	1870	1748	1469
Tmem56	338	-1.9	0.29	-6.8	1.3e-11	2.69e-10	69	71	89	970	313	241	321	627
Rps6ka6	5899	0.9	0.14	6.8	1.31e-11	2.71e-10	7056	9267	7009	7254	4180	3934	4100	4390
Ap1s3	201	2.4	0.35	6.8	1.4e-11	2.89e-10	302	433	305	95	76	55	65	275
Hnrnpc	4537	0.9	0.13	6.8	1.42e-11	2.92e-10	5369	6755	5599	6107	3007	3562	3059	2835
Srsf2	6627	0.7	0.11	6.7	1.5e-11	3.1e-10	8303	8071	8667	6763	4711	5340	4883	6276
Zfp618	2644	-0.9	0.13	-6.7	1.66e-11	3.42e-10	1959	1788	1902	1658	3273	3624	3409	3537
Impad1	7384	1.3	0.19	6.7	1.71e-11	3.52e-10	7972	14907	7854	10595	4003	4104	4206	5435
Ctxn1	798	1.2	0.19	6.7	1.72e-11	3.52e-10	1241	1123	1333	918	522	488	544	216
Myo16	500	-2.4	0.36	-6.7	1.75e-11	3.6e-10	216	67	225	357	952	706	958	515
Gm37393	82	5.3	0.79	6.7	1.82e-11	3.73e-10	69	232	89	32	2	8	1	219
Ube2d1	2415	1	0.14	6.7	1.86e-11	3.8e-10	3220	3486	3118	2450	1581	1924	1566	1972
9030622O22Rik	63	4.6	0.68	6.7	1.91e-11	3.89e-10	143	103	139	100	4	8	5	0
Rad18	2380	0.9	0.14	6.7	1.95e-11	3.99e-10	3050	2799	2877	2543	1463	1693	1421	3196
Lama2	669	-1.3	0.19	-6.7	1.97e-11	4.01e-10	432	470	422	171	1166	1007	1094	592
Cd93	513	-1.7	0.25	-6.7	1.97e-11	4.02e-10	160	178	173	660	462	740	467	1264
Nrn1	57	-7.1	1.06	-6.7	1.99e-11	4.05e-10	0	0	3	2	122	142	111	77
Eif4e	2623	1.1	0.16	6.7	2.01e-11	4.08e-10	3084	4320	3078	3779	1646	1729	1579	1771
Fam214a	351	-1.7	0.26	-6.7	2.02e-11	4.09e-10	158	149	194	162	529	555	567	492
Bzw1	7038	1	0.15	6.7	2.07e-11	4.18e-10	7722	11622	7795	10822	4336	4394	4519	5097
Dok4	160	3	0.44	6.7	2.1e-11	4.25e-10	293	222	270	188	26	55	22	205
Pgk1	2364	1.1	0.17	6.7	2.1e-11	4.25e-10	2789	3676	2998	3733	1539	1171	1572	1436
Slc16a10	429	-2.3	0.35	-6.7	2.12e-11	4.28e-10	113	155	115	527	776	324	825	600
Rn18s-rs5	42338	1.1	0.16	6.7	2.14e-11	4.31e-10	58066	33239	53867	111692	24100	21853	23139	12747
Cbx5	30559	0.7	0.1	6.7	2.15e-11	4.32e-10	38729	39125	38476	33174	25089	22376	25337	22171
Cep170	7838	-0.8	0.12	-6.7	2.19e-11	4.4e-10	5357	6099	5323	6017	10078	8900	10176	10754
Nap1l1	17328	0.9	0.14	6.7	2.32e-11	4.65e-10	19098	26693	19421	25810	11486	11199	12043	12871
Zfp804a	146	-3	0.45	-6.7	2.36e-11	4.72e-10	23	65	29	11	286	351	267	136
Enpp1	168	2.4	0.36	6.7	2.36e-11	4.72e-10	300	274	324	128	46	58	64	151
Ncoa1	993	-1.2	0.19	-6.7	2.39e-11	4.77e-10	639	492	642	585	1315	1506	1385	1380
Arf1	3509	0.8	0.12	6.7	2.45e-11	4.9e-10	4505	4214	4388	4862	2567	2581	2502	2449
Dst	9313	-0.8	0.12	-6.7	2.47e-11	4.94e-10	7350	6368	7128	7850	12603	10544	12410	10249
Cdk1	1024	1.1	0.16	6.7	2.51e-11	5e-10	1374	1461	1439	1273	663	647	700	631
Morf4l2	2516	1.1	0.17	6.7	2.56e-11	5.1e-10	3029	4211	2996	3956	1649	1419	1632	1238
Spry2	491	2	0.29	6.7	2.64e-11	5.25e-10	650	1268	658	393	225	191	232	310
Ppp2r1b	3285	0.8	0.12	6.7	2.74e-11	5.44e-10	4262	4113	4139	3819	2550	2148	2406	2842
Ccnb1	3214	0.8	0.12	6.7	2.8e-11	5.56e-10	4084	4329	4042	3808	2365	2360	2455	2267
Pappa	926	1.6	0.25	6.7	2.86e-11	5.67e-10	1066	1921	1042	1373	458	403	411	732
Slc35d1	1049	1.2	0.18	6.7	2.88e-11	5.7e-10	1566	1504	1540	1067	612	793	588	723
Enpp2	335	-1.8	0.28	-6.7	2.89e-11	5.72e-10	110	154	115	255	409	528	414	698
Maoa	651	1.3	0.2	6.6	3.06e-11	6.03e-10	894	942	864	1125	342	402	325	311
Evx1os	72	-8.6	1.3	-6.6	3.23e-11	6.36e-10	1	0	0	39	129	129	130	151
Gm28438	66	4.3	0.64	6.6	3.26e-11	6.41e-10	157	135	131	74	5	13	5	9
Ncbp2	2160	0.9	0.13	6.6	3.26e-11	6.41e-10	2902	2677	2915	2500	1467	1600	1528	1688
Trp53inp2	1554	-1.1	0.17	-6.6	3.4e-11	6.68e-10	1058	809	1139	905	2142	2275	2181	1921
Pja1	995	1.1	0.16	6.6	3.43e-11	6.72e-10	1256	1297	1249	1624	590	612	592	743
D130019J16Rik	643	-1.7	0.26	-6.6	3.64e-11	7.13e-10	237	299	194	354	951	569	930	1610
Gins4	942	1.2	0.19	6.6	3.74e-11	7.33e-10	1373	1082	1425	1177	532	549	564	831
Nmnat3	75	-4.9	0.75	-6.6	3.79e-11	7.41e-10	4	4	1	132	101	50	133	178
Itpr1	2530	1	0.15	6.6	3.99e-11	7.79e-10	3751	3366	3798	2188	1983	1454	1966	1737
Ipo11	4949	0.8	0.12	6.6	4.02e-11	7.84e-10	5961	6353	5835	7165	3593	3058	3643	3988
Hist1h2bf	203	2.4	0.37	6.6	4.04e-11	7.86e-10	475	232	435	252	82	58	69	23
Cap2	470	1.4	0.22	6.6	4.04e-11	7.87e-10	782	768	773	391	269	285	301	192
Ube2s	353	1.6	0.25	6.6	4.08e-11	7.93e-10	559	606	571	410	195	183	180	118
Abat	419	-2.1	0.32	-6.6	4.15e-11	8.04e-10	207	92	204	205	793	541	772	536
Slc25a16	395	1.7	0.25	6.6	4.15e-11	8.04e-10	587	456	616	598	177	180	163	379
Ralgds	691	-1.8	0.27	-6.6	4.2e-11	8.13e-10	241	538	272	353	1148	1222	1169	583
Amotl1	6099	0.8	0.12	6.6	4.23e-11	8.18e-10	8479	7844	8634	5649	4528	5305	4422	3929
Ssr3	10938	1	0.15	6.6	4.24e-11	8.19e-10	12429	18085	12367	14232	7306	7049	7367	8668
D430019H16Rik	781	-1.4	0.21	-6.6	4.4e-11	8.49e-10	510	435	507	393	1367	981	1387	667
Otub1	718	1.3	0.19	6.6	4.57e-11	8.81e-10	935	1060	992	1251	378	474	385	266
Sypl	1783	0.9	0.14	6.6	4.68e-11	9e-10	2133	2529	2221	1850	1132	1280	1170	1951
Fzd4	1133	1.5	0.23	6.6	4.77e-11	9.17e-10	1789	2166	1797	698	805	430	773	610
Hmgn2	1569	0.9	0.14	6.6	4.8e-11	9.21e-10	1986	2227	2132	2239	1081	1100	1138	646
C330007P06Rik	1500	1.5	0.23	6.6	4.81e-11	9.23e-10	1697	3151	1688	2179	782	680	800	1024
Nkx3-1	134	3.2	0.48	6.6	4.82e-11	9.24e-10	226	323	241	129	18	55	20	62
Gria4	248	-2.1	0.32	-6.6	4.83e-11	9.25e-10	105	81	116	221	454	348	468	187
Rnf219	2276	1	0.16	6.6	5.07e-11	9.69e-10	3260	3258	3398	2190	1738	1278	1784	1303
Cacna1h	324	-1.9	0.29	-6.6	5.35e-11	1.02e-09	148	99	167	230	524	556	492	376
Grb7	159	3.3	0.5	6.6	5.36e-11	1.02e-09	359	304	326	166	24	67	17	8
Chst15	919	-1.4	0.22	-6.6	5.37e-11	1.02e-09	505	560	509	481	1614	1015	1587	1081
Lsm2	1090	1.2	0.19	6.6	5.44e-11	1.04e-09	1620	1367	1581	1397	583	777	590	808
App	2601	-0.8	0.13	-6.6	5.51e-11	1.05e-09	2091	1884	1982	1614	3635	3325	3549	2729
Adamts7	290	-1.9	0.28	-6.5	5.87e-11	1.11e-09	148	111	128	220	508	384	507	314
Hnrnpa0	10261	0.9	0.14	6.5	5.89e-11	1.12e-09	12346	17305	12758	10487	7542	7309	7825	6513
Scn9a	99	-3.4	0.52	-6.5	6.37e-11	1.21e-09	12	31	18	25	223	176	211	98
Sdccag8	698	-1.2	0.19	-6.5	6.39e-11	1.21e-09	408	431	457	580	952	1121	987	643
Gm9801	695	-1.2	0.19	-6.5	6.5e-11	1.23e-09	415	444	427	690	1006	968	1020	592
Cldn12	855	1.3	0.2	6.5	6.72e-11	1.27e-09	1251	1034	1202	1245	499	374	529	704
Gm15893	461	-1.6	0.24	-6.5	6.72e-11	1.27e-09	280	202	252	290	706	813	664	485
Chl1	375	-2.4	0.36	-6.5	6.78e-11	1.28e-09	105	188	88	110	765	402	785	554
Zkscan2	653	-1.3	0.19	-6.5	6.81e-11	1.28e-09	363	401	361	547	885	964	872	829
Stra6l	64	-4.3	0.67	-6.5	7.34e-11	1.38e-09	7	10	3	30	110	208	119	20
Anp32e	12808	0.7	0.11	6.5	7.8e-11	1.46e-09	16960	15933	17218	11213	10663	8841	10553	11082
Thbs1	935	-1.6	0.25	-6.5	7.99e-11	1.5e-09	481	336	483	892	1605	837	1565	1276
Gm27199	57	-8.7	1.34	-6.5	8.03e-11	1.5e-09	0	0	0	3	64	78	68	242
Pak1	2891	-0.9	0.14	-6.5	8.04e-11	1.5e-09	1791	2051	1818	2249	3770	3131	3751	4570
Tmem44	638	-1.4	0.21	-6.5	8.11e-11	1.51e-09	439	331	399	367	993	910	1072	590
Hnrnpk	18423	0.8	0.12	6.5	8.29e-11	1.55e-09	21556	27203	21467	23274	13773	12479	13740	13895
Cpne3	2974	1.1	0.17	6.5	8.34e-11	1.55e-09	3952	5178	3788	2903	2153	1639	2185	1990
Il17ra	417	-1.8	0.28	-6.5	8.35e-11	1.55e-09	173	110	162	229	633	367	555	1105
Gm17082	183	-2.5	0.39	-6.5	8.7e-11	1.62e-09	40	54	59	39	318	201	347	409
Pmepa1	259	-1.9	0.29	-6.5	8.71e-11	1.62e-09	140	119	108	86	448	477	424	272
Thra	507	-1.6	0.24	-6.5	8.7e-11	1.62e-09	293	212	290	317	756	926	703	557
Gm37834	59	-8.7	1.33	-6.5	9.06e-11	1.68e-09	0	0	0	12	58	71	73	257
Agtr2	60	-8.7	1.35	-6.5	9.2e-11	1.7e-09	0	0	0	2	44	119	60	258
Ptpn7	83	-8.4	1.3	-6.5	9.31e-11	1.72e-09	0	1	0	41	140	68	130	285
Ccdc6	3526	0.8	0.12	6.5	9.37e-11	1.73e-09	4659	4565	4813	3342	2851	2499	2780	2697
D330045A20Rik	358	1.6	0.25	6.5	9.38e-11	1.73e-09	558	586	599	336	194	180	201	208
Ftsj3	2207	0.9	0.14	6.5	9.87e-11	1.82e-09	2993	2633	3061	3013	1573	1525	1608	1250
Plek	298	-2.7	0.43	-6.5	1.02e-10	1.87e-09	26	73	21	624	187	416	204	837
Wnt7b	62	-4.5	0.69	-6.5	1.03e-10	1.89e-09	7	2	7	30	99	105	128	116
Gm26979	196	-2.3	0.35	-6.5	1.05e-10	1.93e-09	48	70	52	80	289	241	275	513
Mycn	862	1.2	0.19	6.4	1.16e-10	2.12e-09	1235	1031	1204	1457	532	436	537	467
Plppr3	1205	1.1	0.17	6.4	1.18e-10	2.16e-09	1968	1741	1909	982	954	725	940	423
Actr1b	2302	1	0.16	6.4	1.21e-10	2.21e-09	3295	2639	3285	3156	1459	1724	1413	1441
G3bp2	2275	1.2	0.18	6.4	1.21e-10	2.21e-09	2769	4027	2648	3004	1463	1244	1469	1574
Nop56	10644	0.9	0.14	6.4	1.23e-10	2.25e-09	12854	13985	12321	13341	6352	8487	5934	11879
Ska2	1386	1.1	0.16	6.4	1.24e-10	2.25e-09	1798	2200	1741	1787	923	954	893	790
Nova1	1776	-0.9	0.14	-6.4	1.25e-10	2.28e-09	1249	1199	1195	1806	2212	2189	2331	2025
Nkain3	191	-2.6	0.4	-6.4	1.25e-10	2.28e-09	37	59	24	61	264	210	250	622
Dck	2229	1	0.15	6.4	1.3e-10	2.36e-09	3204	2459	3281	2854	1528	1542	1437	1524
Gm11816	50	-4.6	0.72	-6.4	1.4e-10	2.55e-09	5	5	3	44	122	86	111	27
Mgst3	145	-3.6	0.56	-6.4	1.41e-10	2.55e-09	8	26	4	380	118	224	111	285
Hoxaas2	421	-1.6	0.25	-6.4	1.42e-10	2.57e-09	238	171	251	175	690	658	660	524
Ovca2	62	4.7	0.74	6.4	1.42e-10	2.57e-09	113	122	105	145	1	7	6	0
Setd7	3329	0.9	0.14	6.4	1.43e-10	2.58e-09	4869	4027	4715	2650	2557	2184	2655	2974
Gnl3	2970	0.9	0.15	6.4	1.47e-10	2.65e-09	3462	4249	3461	4015	2033	1738	2059	2745
Gm26917	37846	3.4	0.53	6.4	1.48e-10	2.67e-09	82267	31160	78461	90782	7370	3450	7096	2184
Svep1	847	1.1	0.18	6.4	1.49e-10	2.68e-09	1465	1290	1401	544	676	552	647	204
Rnd3	5123	-0.8	0.12	-6.4	1.54e-10	2.78e-09	4114	3463	4267	3126	6836	6812	6889	5476
Hbb-bt	86	-8.2	1.29	-6.4	1.56e-10	2.81e-09	0	0	1	56	72	116	111	332
Dlx6os1	68	-7.5	1.18	-6.4	1.58e-10	2.83e-09	1	1	0	0	99	118	111	211
Disp2	124	-4.5	0.7	-6.4	1.59e-10	2.85e-09	5	29	2	33	308	129	339	146
Mmd	651	1.7	0.27	6.4	1.61e-10	2.88e-09	840	1518	798	671	334	285	324	435
Hes6	237	-2.2	0.34	-6.4	1.65e-10	2.96e-09	86	123	73	148	340	544	392	195
Ptprn2	532	-1.4	0.22	-6.4	1.67e-10	2.98e-09	251	215	214	925	590	668	550	841
Nebl	777	1.7	0.27	6.4	1.73e-10	3.09e-09	1266	1486	1274	716	529	229	473	242
Pfas	2176	1	0.16	6.4	1.74e-10	3.1e-09	2732	3357	2701	2790	1559	1219	1513	1540
Snrnp70	5306	0.9	0.15	6.4	1.74e-10	3.11e-09	7949	5909	8383	4873	3886	3652	4052	3744
Hist1h2bl	827	1.3	0.2	6.4	1.75e-10	3.11e-09	1476	854	1209	1398	553	454	422	248
Tbl2	973	1.4	0.22	6.4	1.75e-10	3.11e-09	1213	1807	1188	1426	577	435	555	584
C130023A14Rik	317	-2	0.31	-6.4	1.78e-10	3.15e-09	127	204	108	118	543	580	575	284
Ccl3	38	-9	1.41	-6.4	1.79e-10	3.17e-09	0	0	0	13	80	86	86	38
Gfi1b	80	-8.2	1.29	-6.4	1.8e-10	3.19e-09	0	0	1	125	95	103	98	216
Cacna1c	1247	-1.1	0.17	-6.4	1.81e-10	3.21e-09	793	811	801	499	1565	1915	1526	2063
Dlx5	71	-4.5	0.71	-6.4	1.83e-10	3.24e-09	4	11	2	77	172	75	162	62
Evx1	42	-9	1.41	-6.4	1.84e-10	3.25e-09	0	0	0	1	108	47	101	76
Pecam1	203	-2.3	0.36	-6.4	1.84e-10	3.25e-09	68	72	48	225	292	401	252	267
RP24-163M14.1	269	-1.9	0.31	-6.4	1.9e-10	3.35e-09	97	147	92	93	390	467	437	430
Cbx3	3530	0.8	0.13	6.4	1.95e-10	3.43e-09	4488	4822	4547	4238	2690	2334	2805	2320
Cped1	1078	-1.2	0.2	-6.4	2e-10	3.51e-09	553	819	553	670	1509	1512	1522	1489
Iqgap2	3370	-0.8	0.12	-6.4	2.05e-10	3.6e-09	2283	2264	2191	4101	3699	4166	3730	4529
Crb2	358	1.7	0.26	6.4	2.07e-10	3.63e-09	522	645	541	595	206	157	172	26
Magi1	2481	-1	0.16	-6.4	2.09e-10	3.66e-09	1665	1458	1670	1546	3073	4018	2829	3585
Otud4	7293	0.7	0.11	6.4	2.1e-10	3.68e-09	9205	8955	9280	8322	5906	5053	5789	5832
Chek1	2253	1.2	0.19	6.4	2.12e-10	3.71e-09	2425	4112	2449	3995	1235	1280	1311	1214
Tbl1xr1	4091	0.9	0.14	6.3	2.16e-10	3.77e-09	5231	5997	5160	4794	3237	2555	3111	2643
Eif3j1	892	1.4	0.22	6.3	2.2e-10	3.84e-09	1120	1502	1037	1405	431	576	418	642
Cad	2207	0.9	0.14	6.3	2.21e-10	3.86e-09	3117	2471	2814	3548	1567	1557	1439	1145
Adcy4	231	-2.1	0.33	-6.3	2.23e-10	3.88e-09	78	119	92	159	451	331	463	156
Ppp1r14c	99	3	0.47	6.3	2.23e-10	3.89e-09	178	242	172	126	24	27	23	0
Uncx	263	-3	0.47	-6.3	2.24e-10	3.9e-09	88	20	66	31	312	664	355	566
Gca	116	2.9	0.46	6.3	2.31e-10	4e-09	157	316	184	138	24	27	35	50
Rps18	2084	1	0.15	6.3	2.3e-10	4e-09	2771	2329	2888	2440	1265	1448	1423	2111
Usp46	2388	1	0.16	6.3	2.41e-10	4.17e-09	3118	3918	3125	2668	1724	1437	1855	1256
Mab21l1	157	-2.9	0.46	-6.3	2.44e-10	4.22e-09	39	23	42	20	200	401	187	346
Dbx1	365	-1.7	0.26	-6.3	2.47e-10	4.27e-09	182	151	176	643	501	643	485	139
RP23-291B1.2	102	-3.9	0.61	-6.3	2.49e-10	4.31e-09	4	29	11	182	176	133	234	48
Myo5c	103	3	0.48	6.3	2.54e-10	4.39e-09	235	161	243	29	38	23	20	76
Bahcc1	2377	0.9	0.14	6.3	2.59e-10	4.46e-09	3421	2788	3407	3227	1879	1574	1732	989
Ppp1r16b	229	2.1	0.33	6.3	2.62e-10	4.51e-09	385	492	374	248	86	129	85	35
Rims2	667	-1.5	0.24	-6.3	2.7e-10	4.64e-09	347	219	389	713	934	910	890	938
Sphkap	283	2	0.32	6.3	2.7e-10	4.64e-09	490	618	489	129	123	178	100	139
Sncaip	741	-1.2	0.19	-6.3	2.77e-10	4.75e-09	493	393	454	494	1014	994	1092	995
Pycard	1230	1	0.16	6.3	2.85e-10	4.89e-09	1686	1817	1570	1778	873	762	862	492
Vcam1	469	-1.5	0.25	-6.3	2.9e-10	4.97e-09	194	252	210	351	710	534	672	831
Lcp2	60	-7.5	1.19	-6.3	2.95e-10	5.05e-09	1	0	1	50	102	91	132	103
Rorb	233	-1.9	0.3	-6.3	3e-10	5.13e-09	114	92	104	87	400	377	366	322
Pdzd11	706	1.3	0.21	6.3	3.03e-10	5.17e-09	880	1040	958	1155	376	457	329	452
Ppfia2	217	-2.7	0.43	-6.3	3.06e-10	5.22e-09	78	29	69	52	469	198	447	397
Rac2	82	-8.2	1.3	-6.3	3.09e-10	5.26e-09	0	1	0	32	76	132	79	334
Tecrl	105	3.9	0.62	6.3	3.11e-10	5.29e-09	126	398	148	127	11	27	6	0
Gm15533	216	2	0.31	6.3	3.14e-10	5.34e-09	283	373	352	350	79	84	93	110
Rundc3a	96	-3.1	0.5	-6.3	3.22e-10	5.47e-09	14	23	18	95	126	214	136	140
Blvrb	135	-3.1	0.49	-6.3	3.23e-10	5.48e-09	9	32	28	311	162	195	157	183
Btbd3	1359	1	0.16	6.3	3.24e-10	5.5e-09	1709	2081	1741	1758	917	869	959	840
3632451O06Rik	389	1.8	0.28	6.3	3.28e-10	5.56e-09	547	814	622	389	173	253	152	165
Ddc	211	2	0.32	6.3	3.31e-10	5.6e-09	336	312	367	323	82	71	93	104
Abcf2	1554	1.1	0.17	6.3	3.44e-10	5.81e-09	2059	2068	1951	2308	885	1178	876	1110
F2rl2	255	-2.4	0.38	-6.3	3.48e-10	5.87e-09	86	36	98	275	342	430	393	375
Lima1	2649	-0.9	0.14	-6.3	3.49e-10	5.88e-09	1931	1656	2042	1817	3469	3274	3466	3535
Tpm1	7122	0.7	0.12	6.3	3.51e-10	5.91e-09	10032	9389	10280	4444	6472	5167	6068	5124
Nek2	1072	1.3	0.2	6.3	3.53e-10	5.94e-09	1983	1233	1836	1113	712	630	737	331
Kidins220	2958	-0.8	0.13	-6.3	3.56e-10	5.98e-09	2176	1914	2204	2662	3736	3514	3669	3792
Kif1b	9668	-0.7	0.11	-6.3	3.56e-10	5.98e-09	7268	6871	7201	10192	12157	10353	12059	11243
Gdpd2	76	-4.2	0.67	-6.3	3.66e-10	6.14e-09	7	6	9	131	84	253	76	42
Fibin	81	-3.4	0.55	-6.3	3.8e-10	6.36e-09	10	23	13	12	165	153	165	104
Flnc	667	1.3	0.2	6.3	3.86e-10	6.46e-09	1194	884	1137	541	501	401	432	243
Scrn1	338	-2.7	0.43	-6.3	3.87e-10	6.46e-09	56	158	70	337	785	302	740	254
Nxph1	50	-6.4	1.03	-6.3	3.9e-10	6.51e-09	0	4	0	28	91	112	90	77
Gm12158	104	-3	0.48	-6.3	3.92e-10	6.54e-09	31	21	29	15	194	297	170	74
Adgrb1	256	-2.2	0.35	-6.3	3.98e-10	6.63e-09	58	116	66	569	372	402	300	166
Hoxd12	58	-8.3	1.33	-6.3	4.07e-10	6.78e-09	0	0	1	0	102	101	111	153
Itgb1	4020	0.7	0.12	6.2	4.12e-10	6.85e-09	5122	5389	5062	4733	3256	2865	3160	2567
Lum	466	-1.4	0.23	-6.2	4.12e-10	6.85e-09	186	214	186	461	489	576	508	1105
Utp6	2618	1.1	0.17	6.2	4.17e-10	6.92e-09	4221	2735	4144	2519	1747	1696	1809	2075
Gm10544	100	-3.2	0.51	-6.2	4.28e-10	7.1e-09	10	18	18	105	145	106	148	252
Syn2	44	-5	0.8	-6.2	4.44e-10	7.36e-09	5	4	2	3	117	88	135	0
Zcchc6	3879	-0.7	0.11	-6.2	4.46e-10	7.38e-09	2591	2672	2639	2807	4301	4322	4266	7435
2900027M19Rik	70	-4.9	0.79	-6.2	4.52e-10	7.45e-09	0	13	4	21	116	166	109	131
D030055H07Rik	172	-2.4	0.38	-6.2	4.51e-10	7.45e-09	53	37	51	133	212	309	220	359
Kif21b	1720	-0.9	0.14	-6.2	4.52e-10	7.45e-09	1172	1231	1173	1208	2193	2316	2076	2388
Ppfia3	104	-2.8	0.45	-6.2	4.51e-10	7.45e-09	34	23	26	81	207	171	208	82
Bnip3l	2999	0.9	0.15	6.2	4.54e-10	7.48e-09	3472	4617	3622	4136	2109	1969	2131	1939
Gm12097	147	-3	0.48	-6.2	4.55e-10	7.48e-09	11	6	18	19	105	71	104	846
Sparcl1	974	-1	0.17	-6.2	4.61e-10	7.58e-09	658	614	618	748	1373	1189	1328	1267
Pcyt1b	417	-1.5	0.25	-6.2	4.67e-10	7.66e-09	225	197	216	239	562	729	569	600
Gpr137c	452	-1.8	0.28	-6.2	4.7e-10	7.7e-09	164	198	164	261	445	886	504	991
Myom1	293	2.2	0.36	6.2	4.84e-10	7.93e-09	587	399	555	341	154	52	128	125
Foxn2	1342	1.2	0.19	6.2	4.85e-10	7.94e-09	1605	1985	1580	1754	800	620	872	1521
Sox6	1619	-0.9	0.14	-6.2	4.87e-10	7.97e-09	1193	1274	1204	515	2192	2233	2276	2069
Hectd2	626	-1.5	0.23	-6.2	4.91e-10	8.02e-09	307	347	314	476	754	1162	749	900
Gm26789	536	-1.8	0.3	-6.2	4.98e-10	8.12e-09	211	299	215	333	1013	535	1051	630
Ngfr	778	-1.2	0.2	-6.2	4.98e-10	8.12e-09	396	481	367	755	1026	915	975	1309
Dennd4a	1094	-1.3	0.2	-6.2	5.09e-10	8.29e-09	613	604	619	1104	1707	1066	1654	1383
Pik3r3	3470	-0.9	0.14	-6.2	5.22e-10	8.49e-09	2762	2094	2676	2514	4638	4345	4629	4100
Hn1l	3668	0.8	0.14	6.2	5.32e-10	8.65e-09	4993	3891	4884	5227	2614	2418	2637	2681
Ppa1	1814	0.9	0.14	6.2	5.36e-10	8.71e-09	2018	2365	2098	2494	1191	1130	1169	2049
9430041J12Rik	35	-9	1.46	-6.2	5.4e-10	8.76e-09	0	0	0	2	117	41	109	8
Rgs1	33	-8.9	1.44	-6.2	5.41e-10	8.77e-09	0	0	0	3	70	96	81	11
Fmn2	1388	-1.6	0.26	-6.2	5.56e-10	8.99e-09	475	1016	483	1728	2111	1685	2074	1531
1110004F10Rik	1552	1	0.16	6.2	5.72e-10	9.24e-09	1970	2344	1956	2075	1112	964	1090	902
Gdpd1	932	-1.2	0.2	-6.2	5.72e-10	9.24e-09	445	540	492	833	1178	944	1306	1720
Cabp1	54	-4.4	0.71	-6.2	5.73e-10	9.24e-09	5	10	2	10	114	151	116	27
Myb	371	-1.6	0.26	-6.2	5.78e-10	9.32e-09	132	118	156	221	376	447	411	1110
En1	54	-4.8	0.78	-6.2	5.94e-10	9.56e-09	3	3	3	6	76	123	58	160
Apbb1ip	88	-4.1	0.66	-6.2	6.26e-10	1.01e-08	4	13	1	50	77	136	100	323
9530018H14Rik	36	-8.9	1.43	-6.2	6.3e-10	1.01e-08	0	0	0	1	78	54	100	54
Cacul1	2371	0.8	0.13	6.2	6.32e-10	1.02e-08	3199	3112	3124	2325	1851	1853	1811	1691
Kmt2c	10881	-0.6	0.1	-6.2	6.57e-10	1.05e-08	8445	8094	8351	8911	13589	12005	13334	14315
Gm22027	49	4.5	0.73	6.2	6.7e-10	1.07e-08	127	97	123	31	7	3	5	0
Nmur2	41	-6.9	1.12	-6.2	6.75e-10	1.08e-08	1	2	0	4	91	146	81	3
Fam46c	188	-2.1	0.34	-6.2	6.8e-10	1.09e-08	53	46	47	440	209	232	197	279
Syncrip	8194	0.7	0.12	6.2	6.81e-10	1.09e-08	9965	11481	9865	8210	6387	5840	6632	7175
Prps1l3	1629	1.2	0.19	6.2	6.9e-10	1.1e-08	1787	2810	1898	2398	966	888	1022	1266
Npr2	280	-2	0.32	-6.2	7.27e-10	1.16e-08	125	115	138	160	406	674	402	222
Hoxa6	173	-2.5	0.41	-6.2	7.32e-10	1.17e-08	67	39	62	3	273	453	252	236
Pcdh7	1125	1	0.16	6.2	7.46e-10	1.19e-08	1668	1714	1690	486	894	776	880	896
Cadm2	79	-4.5	0.74	-6.2	7.5e-10	1.19e-08	2	18	4	10	179	85	227	103
Rab8a	774	1.2	0.19	6.2	7.58e-10	1.2e-08	956	1106	958	1297	481	429	442	519
Alg2	2403	0.9	0.15	6.2	7.64e-10	1.21e-08	3300	3227	3190	2876	1812	1458	1919	1442
Rps27	1451	-1.2	0.19	-6.2	7.74e-10	1.23e-08	675	1044	786	1348	1399	2449	1761	2146
Lamc1	4489	0.8	0.13	6.1	7.81e-10	1.24e-08	6616	5355	6459	3394	3680	3123	3701	3584
Ctnnd1	995	1	0.17	6.1	8e-10	1.27e-08	1445	1265	1477	888	680	670	685	850
4933430H06Rik	52	-5	0.82	-6.1	8.14e-10	1.29e-08	4	3	2	37	59	176	71	63
Msx3	469	-1.4	0.23	-6.1	8.21e-10	1.3e-08	207	194	247	958	614	590	539	402
Gm42898	645	-1.4	0.22	-6.1	8.69e-10	1.37e-08	335	380	309	291	967	702	977	1198
Ugcg	3947	0.7	0.12	6.1	8.82e-10	1.39e-08	4347	5376	4754	4577	2804	2940	2849	3928
Hoxd13	156	-3.8	0.62	-6.1	8.84e-10	1.39e-08	8	60	9	0	352	239	352	227
Imp4	1550	1	0.17	6.1	8.86e-10	1.39e-08	2291	1943	2311	1748	1180	899	1161	865
Adcyap1r1	886	-1.4	0.23	-6.1	8.91e-10	1.4e-08	494	389	516	1376	1054	1611	1047	604
Omg	300	-1.7	0.27	-6.1	9.02e-10	1.42e-08	146	176	151	123	438	585	486	296
Gm44802	36	-8.7	1.42	-6.1	9.36e-10	1.47e-08	0	0	0	7	73	82	56	68
Wdr47	604	-1.4	0.22	-6.1	9.37e-10	1.47e-08	332	291	327	374	911	637	896	1063
Ighm	75	-8.3	1.35	-6.1	9.47e-10	1.48e-08	1	0	0	6	49	218	64	260
Gm37161	66	-4.2	0.69	-6.1	9.51e-10	1.49e-08	12	5	8	19	104	259	108	11
Fam214b	241	-1.9	0.3	-6.1	9.52e-10	1.49e-08	90	83	77	158	278	319	308	616
Dcaf7	3166	0.8	0.14	6.1	9.55e-10	1.49e-08	4063	4097	4138	4011	2541	1961	2406	2111
Gxylt1	4126	0.7	0.12	6.1	9.71e-10	1.51e-08	5305	5544	5305	3210	3182	3515	3138	3809
Gm27203	83	3.7	0.6	6.1	9.72e-10	1.52e-08	124	122	141	211	16	3	12	38
Ctsl	1924	0.9	0.15	6.1	1.01e-09	1.57e-08	2286	2585	2235	2652	1203	1409	1142	1879
Nol6	940	1.3	0.21	6.1	1.01e-09	1.57e-08	1463	954	1395	1443	505	579	468	716
Yipf5	975	1.2	0.2	6.1	1.01e-09	1.58e-08	1259	1531	1257	1210	606	447	650	838
Bag6	3205	0.8	0.13	6.1	1.03e-09	1.6e-08	4313	3806	4296	4324	2428	2523	2361	1592
Bak1	294	1.9	0.3	6.1	1.05e-09	1.62e-08	558	364	515	433	118	154	124	83
Ammecr1l	1291	1	0.16	6.1	1.05e-09	1.62e-08	1647	1861	1793	1762	977	783	880	625
Efcab1	99	3.5	0.58	6.1	1.05e-09	1.63e-08	200	108	198	58	8	27	12	183
Gm37893	297	-1.9	0.32	-6.1	1.05e-09	1.63e-08	91	157	90	149	406	514	375	595
Oaz1	1141	1	0.16	6.1	1.07e-09	1.65e-08	1472	1350	1507	1877	698	712	772	741
Grb10	47960	0.8	0.14	6.1	1.07e-09	1.65e-08	72701	51593	74286	40614	37148	35190	38381	33766
Cited4	76	-6.1	1.01	-6.1	1.07e-09	1.65e-08	1	0	2	195	78	44	69	214
Nedd4	58915	0.6	0.1	6.1	1.08e-09	1.66e-08	74467	70257	73114	59005	49576	45475	49923	49502
Igf2os	444	1.5	0.25	6.1	1.1e-09	1.7e-08	864	589	862	89	271	273	259	341
Hspa4l	1783	-1	0.17	-6.1	1.15e-09	1.77e-08	927	1263	938	2255	1930	2442	1984	2520
Dnajb5	333	-1.7	0.28	-6.1	1.21e-09	1.85e-08	165	159	163	285	617	392	579	304
Gm20395	145	-3.1	0.52	-6.1	1.21e-09	1.86e-08	25	52	22	13	380	140	357	172
Stum	149	2.3	0.39	6.1	1.22e-09	1.86e-08	208	220	219	404	39	52	37	9
Rpl15	2517	1.4	0.23	6.1	1.22e-09	1.87e-08	2381	4952	2400	5771	1210	1198	1264	959
Hoxd10	113	-3	0.49	-6.1	1.24e-09	1.9e-08	29	12	28	1	184	144	196	313
Zfp950	1086	-1	0.16	-6.1	1.24e-09	1.9e-08	679	772	667	620	1338	1488	1403	1723
Gm12237	174	-2.6	0.43	-6.1	1.3e-09	1.99e-08	58	24	69	145	313	276	319	184
Ache	201	-3	0.49	-6.1	1.31e-09	2e-08	8	42	11	274	145	160	144	825
Hat1	3856	0.7	0.12	6.1	1.35e-09	2.06e-08	4444	4979	4509	5175	2763	2946	2729	3301
Gm42993	1654	-1	0.17	-6.1	1.38e-09	2.11e-08	1153	1216	1074	889	2055	2752	2112	1980
Mgat5b	185	-2.5	0.41	-6.1	1.39e-09	2.11e-08	39	83	34	242	287	255	327	214
9530068E07Rik	2058	0.8	0.13	6	1.46e-09	2.22e-08	2682	2874	2809	2016	1536	1709	1512	1326
Nup43	925	1.1	0.17	6	1.47e-09	2.23e-08	1199	1241	1213	1192	635	532	597	790
Egr1	1835	-1	0.17	-6	1.48e-09	2.24e-08	1302	1141	1367	839	2340	3085	2311	2295
Rcc2	2940	0.9	0.14	6	1.48e-09	2.24e-08	4132	3245	4176	3646	2116	2061	2176	1966
Gad1	151	-3.3	0.54	-6	1.54e-09	2.34e-08	9	49	13	1	206	181	223	524
Alpk1	172	-2.2	0.36	-6	1.55e-09	2.35e-08	54	46	56	77	238	207	254	444
Arpp19	5323	0.9	0.14	6	1.58e-09	2.38e-08	5914	8192	5934	6749	3510	3916	3490	4881
Chrnb2	203	-2	0.33	-6	1.58e-09	2.39e-08	82	91	73	124	380	285	314	278
Ankrd6	1454	-0.9	0.15	-6	1.6e-09	2.41e-08	1074	886	1017	1129	1992	1717	1923	1894
Etv5	715	1.4	0.24	6	1.6e-09	2.41e-08	1306	1060	1327	267	360	610	408	381
Acsl6	293	-1.8	0.29	-6	1.62e-09	2.44e-08	86	113	124	314	361	316	399	628
Cacna1a	393	-1.4	0.24	-6	1.67e-09	2.51e-08	213	186	220	442	563	580	544	391
Zfp839	389	1.7	0.28	6	1.68e-09	2.52e-08	581	507	608	315	142	239	154	568
Aif1l	890	1.1	0.18	6	1.69e-09	2.55e-08	1269	1317	1285	919	635	535	656	504
Mn1	837	-1.4	0.23	-6	1.7e-09	2.55e-08	540	295	490	622	1160	1086	1110	1395
Mdga1	180	-2.6	0.44	-6	1.73e-09	2.59e-08	48	30	56	30	224	429	194	427
Slc22a23	967	-1.2	0.2	-6	1.73e-09	2.59e-08	676	468	628	1095	1272	1475	1280	841
Srcin1	209	-2	0.33	-6	1.73e-09	2.59e-08	102	79	97	72	374	309	396	248
9430092D12Rik	259	-2.5	0.41	-6	1.74e-09	2.6e-08	44	125	39	161	366	389	370	578
Pcdh17	567	-1.4	0.23	-6	1.74e-09	2.6e-08	284	361	248	477	719	838	757	852
Gart	1132	1.1	0.18	6	1.77e-09	2.64e-08	1413	1538	1383	1518	786	578	712	1128
Rps29	404	-1.8	0.3	-6	1.82e-09	2.71e-08	136	168	181	163	336	906	523	819
Adgrg3	65	-4.3	0.71	-6	1.85e-09	2.76e-08	2	12	3	24	90	144	82	165
Lrp2	1109	1.1	0.18	6	1.89e-09	2.81e-08	1763	1253	1668	1442	726	729	731	559
1500004A13Rik	1015	-1	0.17	-6	1.94e-09	2.88e-08	611	677	664	835	1229	1465	1245	1391
Ly86	43	-8.6	1.43	-6	1.96e-09	2.9e-08	0	0	0	5	37	133	37	128
Nolc1	2469	0.8	0.13	6	1.95e-09	2.9e-08	3091	2775	3122	3649	1772	1562	1790	1990
Dtx4	2701	-0.8	0.14	-6	1.98e-09	2.94e-08	1986	1671	2015	4042	3554	3045	3472	1824
Cse1l	8710	0.7	0.11	6	2.01e-09	2.99e-08	10321	11762	10075	10284	6691	6824	6736	6991
Cxadr	2923	0.9	0.14	6	2.02e-09	2.99e-08	3573	4025	3635	3482	2170	1746	2231	2519
Rps26	2361	-0.8	0.13	-6	2.06e-09	3.04e-08	1385	1828	1718	2646	2505	2946	2933	2925
Gm26638	83	-4.3	0.72	-6	2.11e-09	3.12e-08	4	10	6	36	70	300	53	181
RP24-466N11.9	227	-1.9	0.32	-6	2.19e-09	3.23e-08	86	105	91	195	330	428	305	273
Serpini1	255	-2.3	0.39	-6	2.2e-09	3.25e-08	96	108	65	103	352	714	314	290
Hmcn1	4101	-0.8	0.13	-6	2.26e-09	3.33e-08	3293	3343	3236	1441	6094	4860	6093	4446
Pantr2	103	-2.8	0.46	-6	2.3e-09	3.39e-08	25	22	26	135	143	208	152	116
Ehd3	325	-1.7	0.29	-6	2.32e-09	3.4e-08	124	174	118	304	444	534	400	500
Kpna4	8741	0.6	0.1	6	2.32e-09	3.4e-08	10983	10821	10749	9132	6850	7386	7025	6984
Gm37965	64	-4.1	0.69	-6	2.35e-09	3.45e-08	6	12	2	69	94	170	99	62
Hbq1b	38	-8.5	1.42	-6	2.36e-09	3.46e-08	0	0	0	47	69	42	64	80
Nip7	679	1.7	0.29	6	2.36e-09	3.46e-08	913	1127	872	1071	207	480	215	544
Stk33	112	-3	0.5	-6	2.4e-09	3.52e-08	17	38	17	48	221	150	195	213
Rps6ka3	8156	0.9	0.15	6	2.41e-09	3.53e-08	9377	13198	9044	8392	5504	6154	5418	8161
Aurka	703	1.1	0.19	6	2.43e-09	3.55e-08	976	1004	1016	1055	429	498	460	190
Ttll7	178	-2.2	0.37	-6	2.58e-09	3.77e-08	68	79	47	213	345	242	326	103
Fos	272	-1.7	0.28	-6	2.62e-09	3.83e-08	115	152	146	171	407	467	429	291
Pmfbp1	48	-5.3	0.9	-6	2.68e-09	3.91e-08	1	6	2	22	145	62	144	0
Serinc2	260	-1.8	0.3	-5.9	2.74e-09	3.99e-08	139	96	145	159	456	443	424	214
Hrc	104	2.8	0.46	5.9	2.89e-09	4.21e-08	223	186	227	94	25	41	30	6
Epor	173	-2.9	0.48	-5.9	2.92e-09	4.25e-08	34	10	48	236	232	224	212	385
Halr1	82	3	0.51	5.9	2.94e-09	4.27e-08	170	181	173	62	26	17	21	6
Col8a1	171	-2.3	0.39	-5.9	2.97e-09	4.3e-08	52	32	63	12	211	280	250	470
Dnaja2	3775	0.8	0.13	5.9	2.96e-09	4.3e-08	4776	5268	4749	4715	2956	2492	3078	2167
Prmt3	1438	0.9	0.16	5.9	2.96e-09	4.3e-08	2067	1677	2094	1512	1059	941	1024	1125
Stxbp1	941	-1	0.17	-5.9	3e-09	4.34e-08	726	624	672	770	1365	1290	1433	646
Otp	252	-6	1.01	-5.9	3.04e-09	4.39e-08	1	22	6	54	581	319	572	461
Dmtn	189	-3.1	0.52	-5.9	3.15e-09	4.55e-08	52	6	40	241	272	222	270	405
Alg10b	2838	0.8	0.14	5.9	3.17e-09	4.58e-08	3547	4078	3485	3564	2206	1930	2191	1700
Ubap2	7620	0.7	0.11	5.9	3.26e-09	4.71e-08	9552	9177	9629	9099	5847	6477	5736	5440
Topors	3306	0.7	0.13	5.9	3.32e-09	4.79e-08	4514	3951	4442	2773	2636	2415	2668	3046
Cdh3	599	1.4	0.23	5.9	3.35e-09	4.82e-08	1081	1010	1006	202	345	515	352	281
Acss1	277	-2.4	0.4	-5.9	3.36e-09	4.83e-08	68	35	77	519	206	476	272	563
Slco5a1	1411	-1.1	0.18	-5.9	3.36e-09	4.83e-08	843	1073	755	1340	1941	1723	1889	1722
Fam168b	4645	0.7	0.11	5.9	3.37e-09	4.84e-08	6029	5780	6151	5242	3826	3549	3879	2706
Gm43789	58	-5.1	0.85	-5.9	3.38e-09	4.85e-08	1	8	1	9	65	173	64	142
Hcn1	135	2.9	0.49	5.9	3.39e-09	4.85e-08	246	344	270	93	26	71	21	6
Tmem123	2733	0.7	0.12	5.9	3.38e-09	4.85e-08	3527	3244	3459	3515	2110	1942	2086	1978
Zfp207	14981	0.6	0.1	5.9	3.43e-09	4.91e-08	18193	17322	17779	16727	11507	12348	11452	14522
Abce1	5405	0.7	0.12	5.9	3.48e-09	4.98e-08	6260	6545	6404	6952	4086	3577	4178	5239
Cdt1	775	1.2	0.2	5.9	3.52e-09	5.02e-08	969	998	970	1115	364	531	425	828
Itsn2	1868	-0.8	0.14	-5.9	3.58e-09	5.1e-08	1350	1209	1339	974	2231	2384	2283	3176
Cttnbp2	944	-1.2	0.2	-5.9	3.68e-09	5.24e-08	628	504	683	344	1218	1678	1314	1182
Ccni	3877	0.7	0.11	5.9	3.71e-09	5.28e-08	4755	5108	4842	4052	3062	3076	3080	3040
Cd33	53	-8	1.35	-5.9	3.72e-09	5.29e-08	0	0	1	17	64	115	70	154
Rdx	8432	0.6	0.1	5.9	3.78e-09	5.37e-08	10453	9959	10347	8883	6814	6430	6893	7675
Kif20b	5743	0.7	0.12	5.9	3.95e-09	5.61e-08	7454	7105	7219	4900	4765	4008	4734	5757
Eya2	339	-1.7	0.29	-5.9	3.97e-09	5.64e-08	200	119	190	155	537	551	535	427
Fcer1g	42	-5.6	0.95	-5.9	4.01e-09	5.69e-08	1	0	4	28	106	76	86	35
Rps3	5094	0.8	0.14	5.9	4.07e-09	5.77e-08	6829	5388	7069	7814	3475	3947	3444	2783
2610307P16Rik	922	-1.3	0.22	-5.9	4.12e-09	5.84e-08	475	482	518	592	1367	855	1333	1756
Rasef	77	3.1	0.53	5.9	4.17e-09	5.9e-08	134	231	157	29	17	18	24	9
Ppp4c	465	1.4	0.23	5.9	4.23e-09	5.98e-08	668	527	660	780	246	251	227	361
Pvr	321	1.9	0.33	5.9	4.58e-09	6.47e-08	515	629	487	250	106	224	113	246
D930015E06Rik	5132	-0.6	0.11	-5.9	4.61e-09	6.51e-08	4082	4024	3940	4368	6189	6311	6188	5950
Kif26b	1297	-1.4	0.24	-5.9	4.61e-09	6.51e-08	840	672	831	254	2540	1222	2525	1489
Cttn	1545	0.9	0.15	5.9	4.74e-09	6.67e-08	2045	2084	2174	1709	1189	998	1197	965
Evx2	47	-7.3	1.24	-5.9	4.74e-09	6.67e-08	0	2	0	5	102	71	103	92
Ruvbl2	2017	1.1	0.18	5.9	4.82e-09	6.78e-08	2340	2705	2280	4159	1032	1502	944	1173
Wdr43	4128	0.7	0.13	5.9	4.86e-09	6.83e-08	5416	4781	5478	4862	3023	3374	3046	3041
Cenpa	2826	0.7	0.12	5.8	5e-09	7.02e-08	3671	3583	3790	2882	2188	2329	2203	1965
Slc6a6	3673	0.8	0.13	5.8	5.09e-09	7.14e-08	5401	4142	5237	3766	3088	2647	2845	2256
Aff2	1858	-0.9	0.16	-5.8	5.14e-09	7.2e-08	1120	1431	1295	507	2152	3020	2224	3115
Vwf	53	-4.7	0.81	-5.8	5.17e-09	7.24e-08	2	6	1	77	65	139	61	72
Itga9	2520	1	0.17	5.8	5.26e-09	7.35e-08	3673	3891	3578	1707	2108	1373	2083	1744
Ski	2650	0.9	0.16	5.8	5.27e-09	7.36e-08	3842	3198	3818	2973	1737	2261	1704	1664
Tnr	55	-3.8	0.65	-5.8	5.28e-09	7.38e-08	7	7	12	0	138	102	129	47
Tma7	750	1.5	0.26	5.8	5.35e-09	7.47e-08	1099	1026	1153	801	300	579	310	731
Clec14a	72	-4.1	0.7	-5.8	5.37e-09	7.49e-08	5	5	1	38	86	42	55	347
Bub1	5167	0.7	0.12	5.8	5.39e-09	7.51e-08	5784	6673	5665	6875	3692	3746	3777	5122
Gm22883	42	-5.9	1.01	-5.8	5.41e-09	7.53e-08	0	5	1	37	111	81	99	2
Cxxc1	1421	0.9	0.15	5.8	5.44e-09	7.57e-08	1773	1889	1764	1962	916	1083	925	1059
Cacfd1	1464	0.9	0.15	5.8	5.46e-09	7.59e-08	1840	2086	1910	1864	1064	1100	1060	784
Ccnb2	1600	-0.9	0.15	-5.8	5.5e-09	7.63e-08	1077	1137	1057	1270	1875	2248	1902	2231
Hcn4	163	2.3	0.39	5.8	5.5e-09	7.64e-08	349	236	366	125	75	50	74	32
Hivep2	473	-1.3	0.22	-5.8	5.52e-09	7.65e-08	282	271	260	241	698	629	629	776
Ece1	2502	0.8	0.14	5.8	5.55e-09	7.69e-08	3042	3642	3004	3184	1777	1968	1771	1625
Alyref	1032	1.1	0.19	5.8	5.59e-09	7.73e-08	1557	1207	1543	1335	663	750	612	590
Mmrn1	138	-2.9	0.49	-5.8	5.61e-09	7.75e-08	34	12	39	43	161	252	198	367
Invs	951	-1.1	0.18	-5.8	5.67e-09	7.83e-08	596	509	598	604	1123	1315	1112	1752
Ybx3	6434	0.8	0.14	5.8	5.75e-09	7.94e-08	8536	6474	8451	7349	4327	4822	4278	7232
Gm21816	507	-1.6	0.28	-5.8	5.79e-09	7.99e-08	247	359	192	347	850	694	879	491
Maf	356	-1.5	0.25	-5.8	5.83e-09	8.03e-08	186	207	175	97	522	528	506	625
Ptpn13	4480	0.7	0.12	5.8	5.9e-09	8.11e-08	6413	5551	6150	3937	3580	3947	3474	2788
Six4	1934	0.9	0.15	5.8	5.89e-09	8.11e-08	2721	3221	2728	1340	1389	1821	1456	794
Kif20a	706	1.1	0.19	5.8	6.12e-09	8.42e-08	1030	913	1002	900	419	494	438	456
Mcm4	5543	0.7	0.12	5.8	6.53e-09	8.96e-08	7117	6235	7188	7241	4475	3910	4356	3825
Mrfap1	3337	1	0.17	5.8	6.59e-09	9.04e-08	3637	5554	3625	4965	2099	2238	2193	2388
Gars	2049	0.8	0.14	5.8	6.65e-09	9.11e-08	2339	2908	2387	2767	1393	1454	1421	1723
Ifitm2	208	2.1	0.36	5.8	6.71e-09	9.19e-08	385	300	396	135	66	119	75	187
Cfh	45	-7.9	1.37	-5.8	6.77e-09	9.27e-08	0	0	1	18	69	86	83	100
Plxnb2	2763	-0.7	0.13	-5.8	6.79e-09	9.29e-08	2287	1942	2219	2000	3649	3541	3589	2880
Kcnma1	84	-3.2	0.56	-5.8	6.8e-09	9.29e-08	20	7	21	8	162	125	157	171
Gm20501	100	-3.3	0.58	-5.8	6.83e-09	9.33e-08	24	9	21	49	121	299	142	136
Gm43485	65	-4.7	0.81	-5.8	6.94e-09	9.47e-08	16	0	8	0	174	130	189	0
Actn2	150	2.2	0.38	5.8	7.06e-09	9.62e-08	212	242	226	237	55	51	45	134
Larp7	2613	0.8	0.13	5.8	7.07e-09	9.63e-08	3494	2960	3436	2609	2021	1904	1927	2554
Igsf10	1306	-1	0.17	-5.8	7.22e-09	9.82e-08	957	934	889	775	1656	2136	1696	1406
Tnfsf18	39	7.1	1.22	5.8	7.33e-09	9.97e-08	95	107	91	19	3	0	0	0
Cfap54	162	-2.2	0.37	-5.8	7.42e-09	1.01e-07	56	84	56	68	305	270	295	166
Psma7	1975	0.8	0.14	5.8	7.44e-09	1.01e-07	2375	2409	2367	3046	1256	1516	1286	1546
Snhg17	1348	1	0.18	5.8	7.47e-09	1.01e-07	1991	1481	2126	1407	908	885	926	1060
Rgs5	868	1.3	0.23	5.8	7.48e-09	1.01e-07	1319	1862	1320	357	499	801	491	296
Cdv3	6800	0.7	0.12	5.8	7.56e-09	1.02e-07	8657	7660	9018	7125	5296	4854	5520	6270
Pgpep1	532	-1.3	0.22	-5.8	7.69e-09	1.04e-07	364	284	380	225	805	847	861	494
Eya1	2299	0.8	0.15	5.8	7.84e-09	1.06e-07	3229	3638	3288	1501	1689	2221	1769	1053
Map2k1	1010	1	0.17	5.8	7.84e-09	1.06e-07	1322	1449	1320	1448	691	631	742	479
Rab39b	447	-1.5	0.27	-5.8	7.89e-09	1.07e-07	199	289	175	307	624	583	707	693
Fmod	51	-4.5	0.78	-5.8	7.95e-09	1.07e-07	1	10	3	3	104	118	86	79
Gjb2	83	-2.9	0.51	-5.8	8.31e-09	1.12e-07	16	29	18	4	132	177	166	122
Egfr	509	-1.5	0.26	-5.8	8.57e-09	1.15e-07	291	263	269	185	635	1086	668	672
Fam98b	2451	0.8	0.13	5.8	8.68e-09	1.17e-07	3045	3506	3128	1424	1803	2048	1902	2753
Kctd15	791	1.1	0.19	5.8	8.74e-09	1.17e-07	1234	1063	1168	733	537	600	509	486
Jak2	1296	-1	0.17	-5.8	8.8e-09	1.18e-07	833	806	897	1083	1699	1427	1806	1814
Pgm2l1	2333	-0.9	0.16	-5.8	8.86e-09	1.19e-07	1341	1838	1310	1995	2997	2718	2905	3559
Atad2	9779	0.6	0.11	5.7	9.01e-09	1.21e-07	10454	12307	10479	11609	7129	7053	7006	12199
Pak4	1016	0.9	0.17	5.7	9.03e-09	1.21e-07	1424	1570	1384	1058	732	777	759	427
Tor1aip1	1877	0.9	0.16	5.7	9.06e-09	1.21e-07	2261	2876	2196	2093	1341	1181	1321	1747
Dhx9	19567	0.8	0.14	5.7	9.1e-09	1.22e-07	22461	30895	21942	20977	14633	14266	14607	16757
Prdm16	528	-1.5	0.26	-5.7	9.13e-09	1.22e-07	347	187	335	245	838	766	841	669
Tmem64	826	1.3	0.22	5.7	9.16e-09	1.22e-07	1099	1341	1141	945	420	670	425	569
Dpy19l1	2536	0.8	0.13	5.7	9.19e-09	1.23e-07	3132	3245	3176	2596	2051	1720	1891	2475
Pcdhb7	57	-4.2	0.73	-5.7	9.48e-09	1.26e-07	2	10	4	17	95	68	125	136
Gm44090	129	-2.7	0.46	-5.7	9.51e-09	1.27e-07	46	22	51	25	215	317	222	131
Cbx1	3996	0.7	0.11	5.7	9.53e-09	1.27e-07	4709	5226	5084	4352	3106	3299	3103	3091
4930420N18Rik	66	-3.7	0.65	-5.7	9.56e-09	1.27e-07	9	15	4	36	100	173	100	94
Klhl9	4056	1.1	0.2	5.7	9.62e-09	1.28e-07	4767	7299	4736	4894	2904	1975	2827	3043
Plcl1	131	-2.3	0.41	-5.7	9.62e-09	1.28e-07	55	37	55	10	243	265	232	150
Ddx19a	1768	1.2	0.2	5.7	9.81e-09	1.3e-07	2486	2610	2436	2230	964	1552	887	980
Gad2	426	-9.1	1.58	-5.7	9.9e-09	1.31e-07	0	0	7	9	734	1005	700	951
Pou4f2	29	-8.6	1.5	-5.7	9.95e-09	1.32e-07	0	0	0	0	68	41	87	35
Gm3764	646	-9.8	1.71	-5.7	1.02e-08	1.35e-07	0	0	8	5	1452	1518	1470	716
Epb41l5	2708	0.9	0.15	5.7	1.02e-08	1.35e-07	3475	3405	3480	3476	2056	1485	2073	2215
Mir28a	48	-3.9	0.68	-5.7	1.03e-08	1.36e-07	7	6	10	17	102	106	122	15
Spns2	267	-1.9	0.33	-5.7	1.03e-08	1.36e-07	84	97	72	606	364	215	370	331
Tifab	68	-4.7	0.82	-5.7	1.03e-08	1.36e-07	4	0	3	0	76	35	78	346
Rac1	9253	0.7	0.12	5.7	1.04e-08	1.38e-07	11491	11886	11551	8524	6585	8362	6754	8871
9130015G15Rik	143	-4	0.7	-5.7	1.06e-08	1.39e-07	3	53	6	76	274	241	260	231
Gm23956	63	-4.7	0.83	-5.7	1.09e-08	1.43e-07	9	1	3	5	123	31	142	192
Grem2	250	-2.3	0.41	-5.7	1.11e-08	1.45e-07	83	60	121	80	503	241	575	334
Gm44437	254	-2.6	0.45	-5.7	1.17e-08	1.54e-07	68	121	51	229	653	212	595	103
Unc13a	262	-2.2	0.38	-5.7	1.17e-08	1.54e-07	102	56	108	188	339	572	293	441
2810417H13Rik	2534	0.8	0.14	5.7	1.18e-08	1.54e-07	3221	3198	3259	3290	1715	2133	1710	1747
Runx2os2	35	-5.4	0.95	-5.7	1.19e-08	1.56e-07	2	1	3	0	95	58	117	8
Magt1	3680	0.8	0.14	5.7	1.19e-08	1.56e-07	4571	5274	4618	3997	2962	2361	2949	2706
Serinc5	1027	1	0.17	5.7	1.19e-08	1.56e-07	1457	1590	1518	770	705	892	740	539
Gm38235	573	-1.3	0.23	-5.7	1.21e-08	1.58e-07	293	237	355	389	779	668	763	1101
Hbb-bh0	58	-6.8	1.2	-5.7	1.21e-08	1.58e-07	0	0	2	114	78	54	78	140
Canx	11135	0.6	0.11	5.7	1.22e-08	1.59e-07	13452	14183	13530	13499	9221	8334	9417	7441
Camk2a	287	2.5	0.44	5.7	1.24e-08	1.62e-07	679	434	611	245	66	194	54	14
Antxr1	1725	-1	0.18	-5.7	1.26e-08	1.64e-07	1253	1104	1222	777	2123	3011	2122	2188
Sema3d	699	1.5	0.26	5.7	1.27e-08	1.65e-07	871	1680	911	440	409	399	419	462
Sephs1	4686	0.7	0.13	5.7	1.32e-08	1.71e-07	5983	6188	5859	5211	3273	4181	3325	3466
Gm26980	80	3.9	0.69	5.7	1.33e-08	1.74e-07	105	233	112	157	14	1	14	5
Clip3	4267	-0.8	0.14	-5.7	1.34e-08	1.75e-07	2897	3624	2810	2882	5013	6110	5108	5693
Dbi	1161	-1.1	0.2	-5.7	1.36e-08	1.77e-07	590	853	664	882	1245	2012	1367	1675
Fam63b	929	-1.1	0.2	-5.7	1.37e-08	1.78e-07	421	651	457	1002	1039	1246	1067	1546
Exoc6	519	-1.4	0.24	-5.7	1.38e-08	1.79e-07	194	249	179	578	601	463	547	1344
Gm35040	39	-8.1	1.43	-5.7	1.38e-08	1.79e-07	0	0	1	0	57	166	63	21
Dock8	322	-1.9	0.34	-5.7	1.39e-08	1.79e-07	69	51	80	149	219	347	189	1474
Gm13622	263	-1.7	0.3	-5.7	1.39e-08	1.79e-07	146	112	108	100	407	336	432	465
Nhlh1	503	-1.6	0.28	-5.7	1.39e-08	1.79e-07	265	136	285	552	703	705	683	696
Pprc1	2227	0.8	0.14	5.7	1.4e-08	1.81e-07	2879	2719	3051	2755	1547	1849	1525	1486
Barhl1	61	-4.3	0.75	-5.7	1.43e-08	1.84e-07	6	8	4	18	72	249	59	74
Phxr4	585	-1.3	0.23	-5.7	1.46e-08	1.89e-07	307	460	301	483	875	953	847	456
Chd3	3894	-0.8	0.14	-5.7	1.48e-08	1.9e-07	3239	2548	3148	2305	5521	4452	5441	4500
Pdcl	708	1.1	0.19	5.7	1.49e-08	1.91e-07	998	871	961	803	439	470	434	684
Shcbp1l	281	1.5	0.27	5.7	1.49e-08	1.91e-07	437	479	428	295	150	153	157	148
Tbc1d30	214	-2.6	0.47	-5.7	1.52e-08	1.95e-07	88	21	90	109	471	276	475	181
Arid3b	1654	1	0.17	5.7	1.53e-08	1.96e-07	2443	2313	2354	1508	1069	1498	1111	933
Ndst3	201	-1.8	0.32	-5.7	1.53e-08	1.96e-07	83	88	88	88	289	321	293	362
Smtnl2	256	2	0.36	5.7	1.53e-08	1.96e-07	535	342	513	295	110	72	152	30
Prdm13	575	-1.6	0.29	-5.7	1.54e-08	1.97e-07	260	134	296	798	754	603	745	1013
Kcnh4	59	-4.5	0.8	-5.7	1.58e-08	2.02e-07	10	0	9	36	121	130	150	15
Gm38348	70	-3.3	0.59	-5.7	1.58e-08	2.02e-07	18	7	14	48	137	99	150	85
Gm37959	35	-8.1	1.44	-5.7	1.59e-08	2.04e-07	0	0	0	0	38	57	46	142
Zmynd19	1008	1	0.18	5.6	1.61e-08	2.06e-07	1531	1180	1468	1109	702	647	721	704
Ptprk	3604	0.7	0.13	5.6	1.64e-08	2.09e-07	4756	5203	4738	2272	2840	3304	2789	2927
Tgoln1	1209	0.9	0.17	5.6	1.64e-08	2.1e-07	1412	1737	1444	1671	812	813	773	1009
Spred3	424	1.4	0.24	5.6	1.69e-08	2.15e-07	685	568	717	188	238	259	273	462
Islr2	37	-6.6	1.17	-5.6	1.7e-08	2.16e-07	0	0	3	2	82	115	67	30
Slc20a2	1538	1	0.18	5.6	1.71e-08	2.17e-07	2264	1945	2311	1694	1002	1315	951	823
Fap	505	-1.2	0.22	-5.6	1.72e-08	2.18e-07	254	277	243	252	614	569	629	1204
Sertad4	991	-1.1	0.19	-5.6	1.71e-08	2.18e-07	717	578	791	267	1418	1567	1373	1219
Krt8	114	2.4	0.43	5.6	1.75e-08	2.22e-07	235	191	227	95	42	37	45	38
Stab1	233	-1.9	0.34	-5.6	1.76e-08	2.23e-07	110	118	96	244	496	273	455	72
AI606181	311	1.6	0.28	5.6	1.78e-08	2.26e-07	458	566	423	284	141	188	163	266
Wdr7	1643	-0.9	0.15	-5.6	1.79e-08	2.27e-07	1190	1266	1120	1178	2333	1914	2238	1907
Plxnd1	595	-1.3	0.24	-5.6	1.81e-08	2.28e-07	385	247	342	711	776	913	739	648
Gm37694	136	-2.6	0.45	-5.6	1.82e-08	2.3e-07	39	46	32	76	315	129	260	195
Gm43059	251	1.9	0.33	5.6	1.87e-08	2.36e-07	499	395	464	225	137	82	153	57
Srsf3	17782	0.8	0.13	5.6	1.87e-08	2.36e-07	20102	26423	19614	24100	13524	12165	13462	12865
Actg1	1995	-0.8	0.14	-5.6	1.9e-08	2.4e-07	1530	1328	1596	1669	2666	2547	2509	2113
Sema4g	396	-1.7	0.3	-5.6	1.91e-08	2.41e-07	221	141	228	195	540	854	547	444
Rap2b	357	1.6	0.28	5.6	1.93e-08	2.43e-07	508	433	518	642	124	214	155	266
Bcat1	1575	0.9	0.16	5.6	1.94e-08	2.44e-07	2238	2008	2278	2023	1218	967	1269	601
Ulk2	1437	-1	0.18	-5.6	1.95e-08	2.45e-07	728	1150	828	1152	1858	1772	1866	2141
Tmx3	1304	1	0.17	5.6	1.96e-08	2.46e-07	1488	1947	1518	1556	812	927	818	1370
Wdr83os	307	1.7	0.3	5.6	1.96e-08	2.46e-07	574	357	562	432	146	173	139	72
Trip13	1789	0.9	0.16	5.6	1.98e-08	2.48e-07	2159	2521	2109	2549	1356	1101	1240	1276
Ppfibp1	1834	0.9	0.15	5.6	2.03e-08	2.54e-07	2171	2653	2202	2433	1330	1349	1197	1340
Rnf114	1080	0.9	0.16	5.6	2.06e-08	2.58e-07	1321	1418	1303	1664	725	740	690	782
Atxn7l3b	3432	0.7	0.12	5.6	2.09e-08	2.61e-07	4257	4388	4407	4068	2781	2721	2810	2021
Kif1bp	684	-1.1	0.2	-5.6	2.1e-08	2.63e-07	432	371	399	587	882	769	914	1116
Gm43186	368	-1.6	0.28	-5.6	2.11e-08	2.64e-07	154	256	165	199	557	636	512	467
RP24-274N3.1	41	-7.2	1.29	-5.6	2.13e-08	2.66e-07	1	0	1	0	120	37	99	68
Pigm	3622	0.7	0.12	5.6	2.15e-08	2.68e-07	4513	4764	4584	3556	2930	2857	3036	2738
2700069I18Rik	136	-2.9	0.52	-5.6	2.19e-08	2.73e-07	39	38	17	77	176	394	152	196
Gpm6a	185	-2.1	0.37	-5.6	2.21e-08	2.75e-07	61	90	61	122	343	239	300	264
Dazap2	3881	0.7	0.13	5.6	2.25e-08	2.8e-07	4221	5182	4061	4937	2538	2802	2691	4617
Obscn	83	3.1	0.56	5.6	2.26e-08	2.8e-07	204	110	222	61	18	28	16	3
RP24-286J21.7	1424	0.9	0.17	5.6	2.26e-08	2.81e-07	1804	1550	1942	2251	866	1036	848	1092
Psma3	2019	0.8	0.14	5.6	2.27e-08	2.82e-07	2392	2764	2476	2512	1474	1445	1556	1530
Adamts1	1761	0.8	0.14	5.6	2.29e-08	2.84e-07	2357	2613	2435	1180	1453	1397	1468	1184
Slc1a3	843	-1.1	0.19	-5.6	2.29e-08	2.84e-07	513	678	507	570	1193	1227	1167	891
Gna12	555	-1.3	0.24	-5.6	2.3e-08	2.85e-07	244	361	237	374	687	773	663	1101
Tbx3os1	58	-3.8	0.68	-5.6	2.32e-08	2.87e-07	6	4	9	8	67	112	76	183
Cd164	6401	0.6	0.11	5.6	2.35e-08	2.91e-07	7777	8402	7683	5502	5168	5356	5176	6148
Nup205	4014	0.6	0.11	5.6	2.4e-08	2.97e-07	4874	4812	4833	5111	3224	2972	3149	3134
Dzip1	1751	-1	0.19	-5.6	2.48e-08	3.07e-07	1030	1569	1056	944	2289	2913	2260	1945
Gm44833	53	4.9	0.88	5.6	2.51e-08	3.09e-07	49	129	50	33	2	6	1	156
Ero1l	1242	0.9	0.15	5.6	2.53e-08	3.12e-07	1526	1549	1532	1406	853	797	887	1389
Tra2b	6296	1.1	0.2	5.6	2.54e-08	3.13e-07	6526	11471	6229	10662	3990	3442	3828	4222
Arhgap12	2399	-0.8	0.14	-5.6	2.54e-08	3.13e-07	1569	1949	1558	2068	2900	2952	2927	3273
Fkrp	419	1.4	0.25	5.6	2.58e-08	3.17e-07	604	760	638	450	259	221	288	131
Mdk	4366	0.9	0.17	5.6	2.58e-08	3.17e-07	7088	4635	7338	2979	3158	3505	3200	3022
Dhx15	8265	0.7	0.12	5.6	2.59e-08	3.18e-07	9034	11181	9068	10875	6079	6158	6144	7586
Lpar2	338	1.6	0.28	5.6	2.61e-08	3.2e-07	526	377	549	346	167	134	181	421
Smo	3690	0.7	0.12	5.6	2.61e-08	3.2e-07	4869	4469	4951	3442	2903	3153	2866	2872
Slbp	1844	0.8	0.14	5.6	2.69e-08	3.29e-07	2400	2522	2180	2502	1353	1345	1415	1031
Pid1	403	-1.8	0.32	-5.6	2.69e-08	3.29e-07	190	183	152	203	473	886	438	701
Gm9800	288	1.6	0.28	5.6	2.71e-08	3.31e-07	404	508	426	361	161	144	150	151
Gsg1l	87	-3.1	0.56	-5.6	2.72e-08	3.32e-07	16	23	14	47	101	275	117	104
Lgmn	264	-1.8	0.32	-5.6	2.76e-08	3.37e-07	83	144	90	255	360	324	396	462
Wrb	899	0.9	0.17	5.6	2.78e-08	3.4e-07	1147	1158	1197	1237	613	576	624	642
Actb	25643	-0.5	0.1	-5.6	2.79e-08	3.4e-07	20209	22233	20842	22399	29596	32735	30176	26955
Isy1	1149	1	0.18	5.6	2.85e-08	3.47e-07	1727	1293	1771	1240	765	845	739	806
Tcerg1l	184	-2.8	0.5	-5.5	2.89e-08	3.53e-07	20	50	23	120	278	95	272	610
Sf3b3	5672	0.7	0.13	5.5	2.9e-08	3.53e-07	7450	6614	7451	7535	4755	3822	4680	3070
Eif2b1	665	1.2	0.22	5.5	2.91e-08	3.54e-07	917	710	965	810	373	319	414	811
Dnaaf5	1040	0.9	0.17	5.5	2.92e-08	3.55e-07	1423	1392	1394	1254	677	817	726	634
4930505M18Rik	144	-2.1	0.38	-5.5	2.96e-08	3.59e-07	54	47	61	160	237	249	214	133
Baz2b	13988	-0.6	0.1	-5.5	3e-08	3.64e-07	11583	11076	11277	8680	16312	17181	16207	19591
C030013D06Rik	753	1.1	0.2	5.5	3.01e-08	3.65e-07	881	1023	837	824	421	474	378	1188
Gm43483	419	-1.4	0.25	-5.5	3.01e-08	3.65e-07	187	262	197	180	540	572	541	870
R3hdm4	1037	1	0.19	5.5	3.01e-08	3.65e-07	1541	1216	1647	953	663	747	741	788
Rapgef4	117	-2.8	0.5	-5.5	3.01e-08	3.65e-07	25	38	30	50	132	392	147	124
Camk2n1	418	-1.3	0.24	-5.5	3.02e-08	3.65e-07	235	297	246	169	646	595	718	435
Aldh1a7	44	4.9	0.88	5.5	3.02e-08	3.65e-07	59	83	67	18	3	0	4	119
Tarbp1	739	1	0.18	5.5	3.06e-08	3.7e-07	1002	1046	1003	853	515	508	496	491
Pik3r1	1991	-0.9	0.16	-5.5	3.11e-08	3.75e-07	1503	1410	1402	1339	2933	2125	2984	2235
Atpif1	706	-1.3	0.23	-5.5	3.12e-08	3.76e-07	369	359	434	310	750	1223	826	1379
Lrrc16b	496	-1.6	0.29	-5.5	3.19e-08	3.85e-07	323	161	344	391	839	900	772	234
Trim32	888	1.1	0.19	5.5	3.2e-08	3.86e-07	1078	1445	1107	1199	548	643	529	554
Sema6d	2038	-0.8	0.14	-5.5	3.22e-08	3.87e-07	1416	1599	1499	1524	2619	2415	2591	2643
Scube1	2997	-0.7	0.13	-5.5	3.22e-08	3.87e-07	2310	2299	2300	2364	3647	4210	3534	3316
Slc16a1	1362	1.2	0.21	5.5	3.27e-08	3.92e-07	1520	2385	1471	2062	855	692	828	1080
Gucy2f	69	3.2	0.58	5.5	3.28e-08	3.94e-07	182	116	177	7	23	10	19	21
Mcf2l	429	-1.3	0.23	-5.5	3.31e-08	3.97e-07	277	233	277	440	688	586	636	298
Apba2	576	-1.3	0.23	-5.5	3.44e-08	4.13e-07	353	296	383	650	743	1008	758	420
Leo1	2175	0.7	0.13	5.5	3.52e-08	4.22e-07	2637	2724	2789	2213	1691	1651	1622	2072
Cldn9	24	8.5	1.54	5.5	3.63e-08	4.34e-07	56	57	79	3	0	0	0	0
Adra1a	151	-2.1	0.37	-5.5	3.69e-08	4.41e-07	62	80	69	60	258	361	263	56
Tgif1	1223	1	0.18	5.5	3.7e-08	4.43e-07	1727	1620	1659	1229	909	688	954	997
Nkx2-3	27	8.6	1.56	5.5	3.76e-08	4.48e-07	89	24	99	3	0	0	0	0
Gm13525	207	-2.2	0.4	-5.5	3.79e-08	4.52e-07	55	135	55	115	327	398	357	217
Ung	906	1.1	0.2	5.5	3.82e-08	4.55e-07	1317	1158	1355	1293	609	507	700	313
Gm17275	953	0.9	0.17	5.5	3.85e-08	4.58e-07	1280	1294	1219	1274	656	684	674	539
Galnt1	2855	0.7	0.13	5.5	3.87e-08	4.61e-07	3619	3370	3623	3508	2279	1944	2251	2250
Snhg4	1269	1	0.18	5.5	3.88e-08	4.62e-07	1585	1635	1607	1886	895	621	888	1037
Sdad1	2337	0.8	0.14	5.5	3.92e-08	4.66e-07	3336	2714	3300	2638	1921	1638	1865	1285
Gm37906	819	1	0.17	5.5	3.93e-08	4.67e-07	1096	1131	1124	902	586	568	570	578
Pnp	422	1.5	0.26	5.5	3.98e-08	4.73e-07	625	514	590	657	166	269	206	350
Kat7	2028	0.9	0.16	5.5	4.07e-08	4.83e-07	2930	2229	2759	2377	1483	1304	1573	1569
Dnm1	668	-1.3	0.23	-5.5	4.1e-08	4.86e-07	480	303	465	392	1111	817	1106	672
Nol4	50	-4.4	0.81	-5.5	4.1e-08	4.86e-07	3	11	1	7	115	86	117	60
Nr2f2	5252	0.7	0.13	5.5	4.18e-08	4.95e-07	7237	7255	7455	3004	4100	5235	4163	3564
Zc3h4	4276	0.7	0.13	5.5	4.21e-08	4.98e-07	6045	4853	6143	4102	3454	3276	3543	2788
Cpm	533	1.2	0.21	5.5	4.22e-08	4.99e-07	793	755	808	499	333	384	345	347
Ocln	45	4.3	0.79	5.5	4.31e-08	5.09e-07	62	112	91	15	2	3	9	65
Gm29478	45	-5.1	0.94	-5.5	4.34e-08	5.12e-07	3	0	2	17	61	50	61	163
Hcfc2	717	-1.1	0.19	-5.5	4.42e-08	5.22e-07	478	534	466	580	1059	924	1108	586
Hoxc8	161	-2	0.36	-5.5	4.51e-08	5.32e-07	79	64	70	0	289	249	286	246
5330434G04Rik	593	-1.4	0.26	-5.5	4.55e-08	5.36e-07	252	468	254	525	814	957	827	646
H1f0	3592	0.8	0.14	5.5	4.57e-08	5.37e-07	5124	4030	5296	3745	2800	2707	2934	2099
Casr	60	4.1	0.75	5.5	4.58e-08	5.38e-07	171	76	195	10	11	1	12	0
Prps1	876	1.2	0.21	5.5	4.59e-08	5.39e-07	1047	1332	1060	1405	464	650	430	622
Arap2	266	1.6	0.29	5.5	4.62e-08	5.43e-07	461	546	472	50	182	157	161	95
Prps2	965	1.3	0.24	5.5	4.68e-08	5.49e-07	1098	1444	1107	1643	611	323	539	951
Gm37995	49	-4.7	0.86	-5.5	4.71e-08	5.52e-07	4	0	6	32	134	42	83	92
4930538E20Rik	65	-3.2	0.59	-5.5	4.78e-08	5.6e-07	11	9	11	3	86	119	89	190
Haus2	1249	1	0.18	5.5	4.82e-08	5.64e-07	1518	1802	1546	1710	701	1026	798	886
Cpsf2	4010	0.6	0.12	5.5	4.89e-08	5.72e-07	4496	4850	4550	5347	3041	2843	3039	3917
Zbed3	873	1	0.19	5.5	4.89e-08	5.72e-07	1219	1258	1242	777	570	719	539	663
Gm6472	298	-1.5	0.27	-5.5	4.96e-08	5.8e-07	166	152	149	215	411	498	409	387
Trib2	495	-1.3	0.24	-5.5	4.98e-08	5.81e-07	277	234	270	605	692	508	698	672
Lrrc4	598	-1.2	0.22	-5.4	5.05e-08	5.89e-07	355	427	311	407	863	823	794	803
Fcrls	33	-5.8	1.06	-5.4	5.06e-08	5.89e-07	0	3	2	0	66	78	80	36
Zswim6	3178	-0.7	0.12	-5.4	5.06e-08	5.89e-07	2302	2504	2323	2867	3781	3701	3749	4198
Gas2l3	1203	0.9	0.17	5.4	5.07e-08	5.91e-07	1765	1635	1799	1012	812	1062	861	678
Specc1	2386	-0.7	0.13	-5.4	5.08e-08	5.91e-07	1674	1617	1588	1697	2579	2864	2576	4496
Cirh1a	1907	0.7	0.14	5.4	5.13e-08	5.97e-07	2383	2307	2364	2738	1353	1499	1353	1255
Tmem28	145	2.2	0.41	5.4	5.24e-08	6.08e-07	253	178	236	171	54	30	55	186
Atic	1497	1.1	0.2	5.4	5.27e-08	6.12e-07	2118	1534	2071	2371	1039	660	1016	1167
Lect1	47	-3.7	0.68	-5.4	5.29e-08	6.14e-07	7	7	8	11	86	110	88	57
Slc2a9	30	-7.9	1.45	-5.4	5.6e-08	6.49e-07	0	0	1	10	78	69	78	2
Cnnm3	874	1.1	0.2	5.4	5.64e-08	6.54e-07	1247	1003	1357	966	562	623	546	686
Brsk2	604	-1.3	0.23	-5.4	5.67e-08	6.57e-07	404	270	417	552	926	773	921	566
Rb1	1964	-0.8	0.14	-5.4	5.69e-08	6.58e-07	1317	1365	1213	2139	2213	2080	2273	3109
Zfp326	4274	0.6	0.12	5.4	5.75e-08	6.65e-07	5435	5210	5797	3524	3596	3369	3605	3655
Gm37443	39	-5.4	1	-5.4	5.77e-08	6.67e-07	1	0	6	12	84	74	84	51
Glyctk	108	-2.8	0.51	-5.4	5.86e-08	6.77e-07	20	43	26	30	238	127	237	140
Cntnap5a	26	-8.6	1.59	-5.4	5.96e-08	6.88e-07	0	0	0	0	47	125	26	9
Nlk	3517	0.7	0.12	5.4	6.03e-08	6.95e-07	4330	4792	4302	2981	2661	3052	2706	3309
Gla	450	1.3	0.23	5.4	6.04e-08	6.96e-07	727	605	676	598	258	293	293	146
Gm37124	576	-1.2	0.22	-5.4	6.08e-08	7e-07	340	281	355	294	674	813	726	1125
RP24-378B22.2	216	1.9	0.36	5.4	6.1e-08	7.02e-07	347	215	361	404	70	72	96	165
Clic4	4796	0.7	0.12	5.4	6.16e-08	7.08e-07	6259	5260	6223	6821	3769	3627	3827	2585
Scn7a	39	4.6	0.86	5.4	6.17e-08	7.09e-07	85	86	86	35	1	6	5	6
Knop1	3363	0.8	0.15	5.4	6.2e-08	7.12e-07	4474	4150	4734	3758	2735	2074	2822	2153
Sorbs2	2032	-0.8	0.14	-5.4	6.21e-08	7.12e-07	1424	1737	1491	1178	2566	2906	2519	2436
Stk38	2498	-0.7	0.13	-5.4	6.37e-08	7.3e-07	1972	2052	1827	2004	3150	3409	3059	2510
Abca3	353	-1.4	0.25	-5.4	6.41e-08	7.34e-07	151	204	184	334	445	500	446	565
Apold1	51	-4.7	0.86	-5.4	6.41e-08	7.34e-07	0	11	4	35	95	93	104	63
Draxin	1211	-0.8	0.15	-5.4	6.41e-08	7.34e-07	878	927	850	910	1552	1550	1643	1379
Dut	2256	0.8	0.14	5.4	6.42e-08	7.34e-07	2593	2558	2728	2177	1439	1760	1473	3319
Nes	5736	-0.7	0.12	-5.4	6.44e-08	7.36e-07	4540	3829	4639	6495	6952	6526	7071	5832
Gm17191	60	-3.2	0.6	-5.4	6.47e-08	7.38e-07	13	14	14	27	99	177	116	23
Zfp830	555	1.2	0.23	5.4	6.47e-08	7.38e-07	791	1049	752	527	349	406	352	216
Nufip2	4747	0.6	0.11	5.4	6.54e-08	7.46e-07	6029	5459	6002	4914	3810	3804	3826	4135
Svil	2287	-0.7	0.13	-5.4	6.55e-08	7.47e-07	1872	1838	1873	1657	3088	3190	2842	1936
Polr2e	386	1.4	0.26	5.4	6.65e-08	7.57e-07	483	608	480	728	216	177	209	189
Slc39a10	7992	0.6	0.11	5.4	6.7e-08	7.63e-07	10020	9630	10141	7708	6817	6138	6890	6589
F11r	211	2.2	0.4	5.4	6.72e-08	7.64e-07	330	508	303	129	62	139	62	156
Pnmal1	43	-4.2	0.79	-5.4	6.74e-08	7.66e-07	4	7	2	17	87	69	95	59
Lipa	1167	0.8	0.15	5.4	6.75e-08	7.67e-07	1615	1689	1623	809	920	943	905	834
Dis3	3146	0.7	0.13	5.4	6.79e-08	7.71e-07	3832	4230	3693	3604	2492	2284	2501	2533
Plekha6	1132	-1	0.19	-5.4	6.89e-08	7.81e-07	723	933	804	746	1785	1385	1783	899
Tspan3	1856	0.8	0.15	5.4	7.13e-08	8.08e-07	2205	2320	2286	2881	1223	1502	1245	1182
Ppp1r15b	2260	0.9	0.16	5.4	7.2e-08	8.15e-07	2830	3213	2936	3277	1770	1362	1837	853
Gm11653	94	-2.6	0.48	-5.4	7.22e-08	8.16e-07	26	29	21	56	130	174	157	154
Rnft2	285	-1.9	0.35	-5.4	7.27e-08	8.22e-07	177	69	155	182	488	474	478	258
Gm42551	358	-1.8	0.33	-5.4	7.29e-08	8.24e-07	80	186	105	194	337	559	329	1071
Hsp90aa1	24547	0.5	0.1	5.4	7.41e-08	8.37e-07	27213	29076	26804	29134	19141	19561	19137	26309
Gm28323	189	-1.8	0.34	-5.4	7.45e-08	8.4e-07	80	84	109	86	341	289	338	187
Nop58	8023	0.6	0.11	5.4	7.45e-08	8.4e-07	8844	9966	8631	8861	5909	6215	6042	9712
8030462N17Rik	851	1	0.18	5.4	7.54e-08	8.5e-07	1085	1141	1061	1176	624	521	544	654
Epcam	443	1.3	0.25	5.4	7.68e-08	8.64e-07	709	792	695	123	255	368	256	349
Gm44883	149	-2.3	0.43	-5.4	7.68e-08	8.64e-07	53	29	35	179	167	252	152	322
Grhl3	144	-2.1	0.4	-5.4	7.7e-08	8.66e-07	43	70	56	6	251	256	221	248
Gm37447	72	-3.4	0.63	-5.4	7.81e-08	8.77e-07	19	6	14	10	146	72	185	127
Ammecr1	1360	0.9	0.16	5.4	7.98e-08	8.96e-07	1662	1979	1647	1393	876	1091	911	1321
F2rl1	27	8.6	1.6	5.4	8.02e-08	9e-07	94	15	100	8	0	0	0	0
Myo18a	1241	-0.8	0.15	-5.4	8.11e-08	9.1e-07	946	947	882	958	1600	1645	1651	1302
Nnat	1635	-0.9	0.16	-5.4	8.15e-08	9.13e-07	1140	985	1213	2281	1973	2329	1858	1302
Snord17	216	1.9	0.35	5.4	8.15e-08	9.13e-07	412	244	416	291	101	93	101	69
C1qb	27	-8.1	1.51	-5.4	8.16e-08	9.13e-07	0	0	0	9	30	75	36	65
Epb41l4a	753	-1.1	0.2	-5.4	8.21e-08	9.18e-07	524	487	438	648	986	1165	901	876
Spta1	1721	-5.9	1.11	-5.4	8.22e-08	9.19e-07	44	3	63	2412	2471	1829	2378	4565
Xpot	3311	0.9	0.16	5.4	8.23e-08	9.19e-07	4428	4308	4383	4265	2722	1802	2693	1883
Tubb6	502	1.2	0.23	5.4	8.24e-08	9.19e-07	811	603	786	650	349	286	314	216
Gtf3c4	2108	0.7	0.14	5.4	8.26e-08	9.21e-07	2964	2570	2870	2297	1720	1581	1748	1113
Lrp8	1512	-0.9	0.17	-5.4	8.36e-08	9.32e-07	940	1051	912	1712	2039	1496	2010	1936
Gjb4	38	-7.6	1.41	-5.4	8.45e-08	9.41e-07	1	0	0	3	52	86	46	113
Rbm3	2679	0.9	0.17	5.4	8.54e-08	9.5e-07	2917	3920	2943	4218	1907	1509	1850	2166
Nrcam	1005	-1	0.18	-5.4	8.59e-08	9.55e-07	673	660	664	1129	1197	1540	1189	985
Trmt10c	841	1.1	0.2	5.4	8.71e-08	9.68e-07	1039	1448	1021	876	513	610	520	704
Cbfa2t3	383	-1.7	0.31	-5.4	8.75e-08	9.72e-07	215	104	214	248	648	430	599	604
1700017B05Rik	454	1.2	0.22	5.4	8.78e-08	9.74e-07	698	655	686	519	302	314	279	181
Pex5l	198	-1.9	0.36	-5.3	9.06e-08	1e-06	86	76	86	101	359	211	368	294
Tm9sf2	1860	0.8	0.15	5.3	9.35e-08	1.04e-06	2507	2396	2420	2083	1511	1208	1509	1250
Gm37941	38	-6.1	1.14	-5.3	9.5e-08	1.05e-06	1	2	0	10	63	38	78	115
Mcl1	4294	1	0.19	5.3	9.54e-08	1.06e-06	4810	8320	4691	5415	2977	2880	2851	2412
Dlx1	65	-4.1	0.77	-5.3	9.57e-08	1.06e-06	4	18	1	86	129	146	109	29
Hoxb1	477	1.3	0.25	5.3	9.69e-08	1.07e-06	843	720	986	61	301	415	292	199
Gm17435	267	-1.5	0.28	-5.3	9.76e-08	1.08e-06	154	173	171	163	442	440	508	85
Nkrf	1050	0.9	0.16	5.3	9.78e-08	1.08e-06	1421	1481	1402	978	784	828	753	751
4930523C07Rik	87	-2.7	0.52	-5.3	9.81e-08	1.08e-06	12	26	22	72	121	136	126	180
Mcoln3	292	1.7	0.32	5.3	1e-07	1.11e-06	453	601	461	241	131	219	119	109
Cep85l	660	-1.1	0.2	-5.3	1.01e-07	1.11e-06	465	374	467	411	957	840	957	808
Psmd11	2977	0.7	0.13	5.3	1.02e-07	1.12e-06	3836	3427	3825	3574	2155	2434	2296	2267
Gm15626	36	4.6	0.87	5.3	1.03e-07	1.14e-06	74	88	68	50	5	3	2	0
Hoxa1	186	1.9	0.36	5.3	1.03e-07	1.14e-06	353	393	323	129	106	64	109	14
Gm37466	390	-1.6	0.3	-5.3	1.05e-07	1.15e-06	197	193	207	169	705	375	740	538
Gm43231	116	-2.5	0.47	-5.3	1.05e-07	1.15e-06	36	44	24	96	160	272	166	128
Ccser2	2288	-0.7	0.14	-5.3	1.06e-07	1.16e-06	1774	1586	1719	1617	2948	2513	2919	3224
Sec61a1	2007	0.8	0.16	5.3	1.07e-07	1.17e-06	2936	2343	2952	1948	1637	1342	1641	1261
Pum2	9842	0.7	0.13	5.3	1.07e-07	1.17e-06	11147	13922	10853	10871	7683	7088	7649	9525
Wbp5	1019	1.3	0.25	5.3	1.08e-07	1.18e-06	1049	2341	1124	978	519	602	613	924
Atxn1l	1775	1.1	0.2	5.3	1.08e-07	1.18e-06	2765	2504	2818	1738	1518	837	1479	542
Mns1	1797	0.8	0.14	5.3	1.08e-07	1.18e-06	2175	2059	2222	1957	1236	1379	1198	2153
Osr2	49	-4	0.75	-5.3	1.14e-07	1.24e-06	7	5	9	1	133	48	140	51
Utp18	887	1.2	0.23	5.3	1.15e-07	1.25e-06	1175	1467	1099	1351	604	386	621	396
Ccny	2377	0.9	0.18	5.3	1.15e-07	1.25e-06	2594	3929	2682	2860	1510	1838	1440	2166
Pik3cg	91	-3.1	0.59	-5.3	1.15e-07	1.25e-06	10	13	3	24	60	91	78	447
Sntb2	1684	0.8	0.16	5.3	1.16e-07	1.26e-06	2307	2534	2425	1168	1414	1182	1500	942
Epm2aip1	2753	0.8	0.15	5.3	1.17e-07	1.27e-06	3633	4165	3520	2984	2358	1843	2324	1195
Psmd1	6545	0.6	0.11	5.3	1.18e-07	1.28e-06	8288	7684	8220	6781	5476	4833	5590	5491
Scd2	14322	0.8	0.15	5.3	1.18e-07	1.28e-06	19416	16919	19620	16867	12347	8215	12125	9066
Hecw2	858	-1.3	0.25	-5.3	1.18e-07	1.29e-06	479	573	483	639	1586	810	1522	770
Hoxd4	196	-2	0.37	-5.3	1.2e-07	1.3e-06	116	65	86	83	405	219	414	178
Lacc1	307	1.5	0.28	5.3	1.23e-07	1.33e-06	419	390	440	274	154	173	129	476
Hsd17b4	1579	-0.8	0.15	-5.3	1.24e-07	1.35e-06	1231	1033	1223	1174	2210	1822	2079	1857
Gm44288	76	-3.9	0.74	-5.3	1.25e-07	1.35e-06	10	3	14	32	71	294	76	107
Amer1	1483	0.8	0.14	5.3	1.28e-07	1.39e-06	1919	1806	1912	1397	1125	1066	1129	1513
Kcnq5	295	1.6	0.29	5.3	1.28e-07	1.39e-06	521	500	498	92	155	224	144	228
Slc38a5	69	-3.9	0.75	-5.3	1.29e-07	1.39e-06	11	1	8	132	74	147	65	116
Gsn	72	-3.1	0.59	-5.3	1.29e-07	1.39e-06	12	17	14	12	93	204	85	140
Mettl2	650	1.3	0.24	5.3	1.31e-07	1.42e-06	1096	782	1114	707	447	309	477	267
Slc2a12	61	-3.9	0.75	-5.3	1.32e-07	1.42e-06	1	18	7	30	119	98	112	107
Gm38197	167	-1.9	0.36	-5.3	1.34e-07	1.44e-06	69	74	79	53	291	227	304	242
Gabrb2	107	-3.2	0.61	-5.3	1.35e-07	1.46e-06	18	33	9	64	246	78	247	165
Gins2	948	0.9	0.17	5.3	1.37e-07	1.47e-06	1166	1016	1123	2300	626	525	603	225
Prim1	2013	0.8	0.16	5.3	1.39e-07	1.49e-06	2455	2113	2582	2576	1242	1537	1235	2366
Col15a1	127	-2.2	0.42	-5.3	1.39e-07	1.5e-06	40	29	46	22	177	174	177	353
Asb14	89	2.6	0.5	5.3	1.41e-07	1.51e-06	132	182	117	201	21	27	22	12
Cacna2d3	98	-2.9	0.55	-5.3	1.42e-07	1.52e-06	11	41	14	56	149	154	167	187
Fmnl1	45	-7.5	1.42	-5.3	1.42e-07	1.52e-06	0	0	1	18	67	21	83	166
Gm37474	134	-2.1	0.4	-5.3	1.42e-07	1.52e-06	41	63	47	115	208	235	202	162
Yy1	1899	0.8	0.15	5.3	1.44e-07	1.54e-06	2558	2283	2498	1881	1371	1590	1311	1700
Syngr1	28	-7.7	1.47	-5.3	1.45e-07	1.55e-06	0	0	1	17	81	51	73	2
Tulp4	3449	-0.7	0.14	-5.3	1.45e-07	1.56e-06	2775	2465	2720	2430	4643	3726	4699	4138
Akr1a1	1800	0.8	0.15	5.3	1.46e-07	1.57e-06	2228	2349	2185	2077	1257	1479	1250	1575
Cbfb	3664	0.9	0.16	5.3	1.47e-07	1.57e-06	4108	6143	4182	4084	2655	2439	2777	2927
Inpp5d	53	-4	0.76	-5.3	1.48e-07	1.59e-06	4	12	7	29	151	52	138	32
Gm44433	249	-2.2	0.42	-5.3	1.5e-07	1.6e-06	123	37	135	81	447	452	448	266
Tmem132c	917	-1	0.19	-5.3	1.51e-07	1.62e-06	588	544	600	844	1279	939	1238	1302
Zfp663	98	-2.4	0.47	-5.3	1.52e-07	1.62e-06	31	28	35	114	208	134	171	62
Pik3c2b	1866	-0.7	0.14	-5.2	1.53e-07	1.63e-06	1410	1371	1433	2143	2239	2394	2265	1672
Syk	105	-2.7	0.52	-5.2	1.53e-07	1.63e-06	24	41	14	86	143	229	152	146
Cdcp1	96	2.6	0.5	5.2	1.57e-07	1.67e-06	178	253	197	39	50	24	30	0
Rap1a	2895	0.9	0.17	5.2	1.58e-07	1.68e-06	3011	4581	3099	3830	1849	2091	1887	2809
Snhg11	1028	-1.1	0.22	-5.2	1.58e-07	1.68e-06	521	718	565	694	1087	1830	1107	1705
5430416N02Rik	1003	0.9	0.17	5.2	1.6e-07	1.69e-06	1367	1275	1273	1322	708	610	760	711
Hnrnpdl	13058	0.6	0.11	5.2	1.6e-07	1.69e-06	14777	16520	15326	16611	10532	9761	11109	9827
Zfhx2	1404	-1.2	0.22	-5.2	1.61e-07	1.7e-06	998	557	1087	900	2065	1811	2048	1767
A530083M17Rik	391	-1.4	0.28	-5.2	1.64e-07	1.74e-06	233	138	233	299	588	488	565	583
Mageh1	255	-1.5	0.29	-5.2	1.66e-07	1.76e-06	110	103	112	116	307	296	329	667
2700081O15Rik	3588	0.8	0.15	5.2	1.67e-07	1.77e-06	4416	5619	4417	4049	2998	2554	2940	1710
Fxr1	5910	0.7	0.13	5.2	1.67e-07	1.77e-06	6662	8234	6659	6465	4558	4665	4429	5607
Taf10	366	1.3	0.24	5.2	1.69e-07	1.79e-06	491	512	480	389	207	212	195	444
Fbxo30	3310	0.6	0.12	5.2	1.7e-07	1.79e-06	4178	4046	4084	3072	2825	2568	2654	3054
Kirrel3os	50	-3.7	0.71	-5.2	1.7e-07	1.79e-06	4	7	11	8	75	136	65	95
Hspa4	22224	0.5	0.09	5.2	1.72e-07	1.81e-06	26137	25456	25651	22547	18707	17622	18427	23246
Gm43253	29	-6.2	1.19	-5.2	1.75e-07	1.84e-06	1	0	2	5	75	67	60	20
Adk	568	1.1	0.22	5.2	1.76e-07	1.85e-06	788	646	842	665	354	348	341	562
Gm37107	62	-3.2	0.62	-5.2	1.77e-07	1.86e-06	7	23	13	33	119	143	124	35
Kcmf1	3028	0.6	0.12	5.2	1.77e-07	1.86e-06	3929	3646	3633	3794	2395	2435	2415	1978
Gm26563	362	1.8	0.34	5.2	1.77e-07	1.87e-06	404	709	348	648	116	202	117	353
Prkcq	77	-2.8	0.53	-5.2	1.79e-07	1.88e-06	13	18	22	58	116	127	113	151
Desi2	1527	1	0.19	5.2	1.8e-07	1.89e-06	1594	2425	1626	2317	973	888	963	1433
Neurog1	136	-2.1	0.4	-5.2	1.81e-07	1.9e-06	48	37	59	120	203	221	197	201
Celf4	614	-1	0.2	-5.2	1.83e-07	1.92e-06	391	395	398	289	839	855	743	1004
Dopey2	310	-1.8	0.34	-5.2	1.85e-07	1.94e-06	113	225	106	187	504	534	446	362
Elovl6	4591	0.7	0.13	5.2	1.88e-07	1.97e-06	5985	5740	5890	4132	3337	4239	3413	3988
Limch1	1446	-0.8	0.16	-5.2	1.89e-07	1.98e-06	1234	909	1140	973	1979	1910	1989	1438
Gm36963	500	-1.9	0.37	-5.2	1.91e-07	2e-06	113	364	135	312	791	586	799	900
Elovl5	1814	1	0.18	5.2	1.92e-07	2.01e-06	2075	2693	1980	2690	1267	954	1266	1583
Srsf10	7640	0.7	0.14	5.2	1.96e-07	2.05e-06	8518	11126	8456	9395	5080	6597	5159	6791
Fem1b	6529	0.7	0.13	5.2	1.97e-07	2.05e-06	7708	8499	7793	8759	5390	4322	5382	4379
Spn	41	-8.1	1.56	-5.2	1.97e-07	2.05e-06	0	0	0	10	68	3	70	180
Prkcsh	642	1.1	0.22	5.2	1.99e-07	2.07e-06	913	798	896	984	329	484	380	352
March4	38	-4.3	0.82	-5.2	2e-07	2.09e-06	4	5	3	6	100	44	83	63
Mrps7	462	1.2	0.23	5.2	2.02e-07	2.11e-06	662	655	694	577	280	337	273	220
Kcnk1	99	2.7	0.52	5.2	2.03e-07	2.12e-06	174	224	150	40	16	50	23	115
Kcnq3	458	-1.3	0.25	-5.2	2.04e-07	2.13e-06	285	241	275	204	562	817	604	677
Fgfr3	777	-1.2	0.22	-5.2	2.05e-07	2.14e-06	447	290	468	917	870	893	918	1412
Gm23183	42	-4.1	0.79	-5.2	2.05e-07	2.14e-06	7	6	3	1	112	47	119	45
Pgd	1324	0.8	0.16	5.2	2.09e-07	2.17e-06	1625	1412	1580	2265	895	790	923	1104
Adgra1	59	-3.2	0.63	-5.2	2.1e-07	2.18e-06	12	9	12	34	89	146	82	89
Sgip1	424	-1.3	0.25	-5.2	2.1e-07	2.18e-06	216	291	246	220	590	529	714	589
Dact1	1360	1	0.19	5.2	2.11e-07	2.18e-06	2073	1971	2207	761	1173	763	1186	748
Piezo2	519	-1.3	0.24	-5.2	2.11e-07	2.18e-06	301	406	258	274	731	813	762	610
Cpne6	27	-8.3	1.61	-5.2	2.11e-07	2.19e-06	0	0	0	35	95	7	73	3
Tubb4a	892	-1.1	0.21	-5.2	2.15e-07	2.23e-06	634	595	616	530	1136	1639	1118	868
Tshz2	432	-1.4	0.28	-5.2	2.16e-07	2.23e-06	293	177	275	43	633	781	578	680
Dll1	653	-1.1	0.21	-5.2	2.16e-07	2.23e-06	400	308	421	896	805	856	760	775
B830012L14Rik	1400	1	0.18	5.2	2.18e-07	2.25e-06	1578	2362	1679	1287	918	1073	893	1406
Gtpbp4	4715	0.6	0.11	5.2	2.18e-07	2.25e-06	5484	5367	5491	5541	3567	3818	3559	4891
Trim2	5096	-0.6	0.11	-5.2	2.18e-07	2.25e-06	3931	4117	3902	4342	6275	5605	6127	6468
Ralgps1	571	-1.3	0.24	-5.2	2.19e-07	2.26e-06	330	418	311	311	725	1080	733	660
Sema5b	1869	-1.1	0.21	-5.2	2.19e-07	2.26e-06	1060	1211	1010	2847	1889	3376	1863	1697
Dcun1d1	2273	0.7	0.14	5.2	2.24e-07	2.31e-06	2909	2870	2811	2680	1836	1583	1861	1631
Uck2	1847	0.8	0.15	5.2	2.27e-07	2.34e-06	2479	2132	2440	2457	1492	1203	1440	1133
Lsm12	1648	0.7	0.14	5.2	2.29e-07	2.36e-06	1986	2008	2116	2135	1206	1285	1202	1243
Hmgb1	3691	0.7	0.14	5.2	2.3e-07	2.37e-06	4094	5550	4259	4245	2496	3123	2829	2931
Prmt5	1806	0.7	0.14	5.2	2.31e-07	2.37e-06	2326	2133	2269	2331	1373	1421	1297	1294
Got2	1465	0.8	0.15	5.2	2.32e-07	2.38e-06	1708	1909	1745	2065	985	1134	1041	1130
Gm26578	26	7.5	1.45	5.2	2.32e-07	2.38e-06	94	34	64	13	1	0	0	2
Gm16551	210	-1.8	0.35	-5.2	2.35e-07	2.41e-06	78	121	73	371	320	360	272	86
1300017J02Rik	143	-3	0.58	-5.2	2.36e-07	2.42e-06	50	6	37	153	195	286	206	211
Aurkb	1689	1	0.2	5.2	2.37e-07	2.42e-06	2131	2118	2035	2339	857	1396	813	1826
Gm11693	35	5	0.97	5.2	2.37e-07	2.43e-06	85	43	98	21	3	0	4	26
Ddr2	2296	-0.7	0.13	-5.2	2.38e-07	2.44e-06	1776	1702	1782	1002	2670	2979	2760	3695
Gm26744	30	-6.9	1.34	-5.2	2.43e-07	2.48e-06	0	2	0	15	68	74	68	15
Park7	468	1.2	0.24	5.2	2.43e-07	2.48e-06	557	710	549	763	258	221	282	403
Cspg5	297	-1.5	0.29	-5.2	2.44e-07	2.49e-06	155	97	139	197	400	316	383	689
Hes3	23	8	1.54	5.2	2.44e-07	2.49e-06	31	68	39	48	0	0	0	2
Wdr77	1151	1	0.19	5.2	2.45e-07	2.5e-06	1256	1761	1274	1750	716	790	680	985
Baiap2l1	475	1.3	0.25	5.2	2.46e-07	2.51e-06	821	629	716	483	329	204	334	287
Zfp275	1555	0.7	0.14	5.2	2.5e-07	2.55e-06	2100	2001	2093	1482	1318	1219	1198	1027
Nsfl1c	1771	0.9	0.17	5.2	2.55e-07	2.6e-06	2229	2246	2208	2621	1338	963	1366	1198
Celf5	72	-2.8	0.54	-5.2	2.56e-07	2.6e-06	20	15	25	57	129	137	151	44
Gm26982	110	2.5	0.48	5.2	2.56e-07	2.6e-06	192	159	189	215	31	18	45	33
Chchd4	469	1.3	0.25	5.2	2.58e-07	2.61e-06	597	689	547	718	302	191	257	447
N4bp1	4064	0.7	0.13	5.2	2.58e-07	2.61e-06	4801	5184	4768	4305	3359	2721	3218	4160
Ywhag	5197	0.6	0.12	5.2	2.58e-07	2.62e-06	6914	6041	6962	5620	4071	4547	4308	3112
Zbtb18	1717	-0.7	0.14	-5.2	2.58e-07	2.62e-06	1253	1292	1249	2093	2050	2051	2083	1667
Aox4	30	5.7	1.1	5.2	2.6e-07	2.63e-06	84	36	92	24	3	0	1	2
Gm26542	143	2	0.38	5.1	2.64e-07	2.67e-06	237	219	280	164	66	65	58	56
Rpl37	1334	-1	0.19	-5.1	2.66e-07	2.69e-06	702	1069	718	1270	1360	1949	1599	2005
Ncf4	25	-7.9	1.53	-5.1	2.66e-07	2.69e-06	0	0	0	18	23	71	32	54
Dhdh	953	1.4	0.26	5.1	2.69e-07	2.72e-06	1001	1490	1032	552	324	729	352	2143
Alg13	1863	0.7	0.14	5.1	2.7e-07	2.73e-06	2302	2479	2399	2135	1358	1610	1358	1266
Zzef1	2036	-0.7	0.14	-5.1	2.71e-07	2.73e-06	1549	1355	1574	1720	2499	2334	2516	2739
Gm15816	42	-5.5	1.07	-5.1	2.71e-07	2.74e-06	2	1	0	23	31	85	43	154
Actn1	1442	0.8	0.15	5.1	2.73e-07	2.75e-06	2048	1823	2079	1356	1130	1223	1103	773
Nxpe3	255	-1.7	0.33	-5.1	2.73e-07	2.75e-06	108	199	109	188	445	433	470	86
Tdrd12	27	7.6	1.48	5.1	2.74e-07	2.76e-06	72	57	77	10	0	0	1	0
Plgrkt	263	-1.5	0.29	-5.1	2.87e-07	2.89e-06	132	126	149	217	368	420	350	340
Cox6c	867	-1	0.19	-5.1	2.9e-07	2.91e-06	608	484	607	625	1013	1206	1146	1249
Tle2	162	-1.8	0.35	-5.1	2.9e-07	2.92e-06	102	86	83	34	310	303	324	56
Hpse2	38	-5.1	0.99	-5.1	2.91e-07	2.92e-06	0	9	1	7	60	116	90	21
Gid4	1315	0.8	0.16	5.1	2.93e-07	2.94e-06	1499	1709	1503	1984	867	971	863	1125
Car14	372	1.5	0.29	5.1	2.95e-07	2.96e-06	579	545	428	572	156	245	151	304
Nrip1	4917	0.6	0.11	5.1	3.03e-07	3.04e-06	6326	6083	6388	4323	4207	4377	4088	3549
Thap3	212	-1.6	0.32	-5.1	3.05e-07	3.06e-06	99	95	110	120	294	347	293	335
Lmod1	51	3.5	0.67	5.1	3.07e-07	3.07e-06	122	74	113	33	7	13	9	36
Dffa	253	1.7	0.34	5.1	3.08e-07	3.08e-06	401	288	466	399	95	151	106	119
Cbfa2t2	2731	-0.8	0.16	-5.1	3.12e-07	3.12e-06	1780	2436	1787	2070	3651	3233	3646	3247
Nol9	1302	0.9	0.17	5.1	3.14e-07	3.14e-06	1666	1870	1661	1383	856	1128	866	985
Mdn1	12240	0.6	0.11	5.1	3.15e-07	3.15e-06	15272	13257	14821	12729	10146	9075	10210	12412
Stam2	1156	0.8	0.16	5.1	3.19e-07	3.18e-06	1426	1355	1428	1496	797	757	843	1143
Irf2bp2	998	0.8	0.16	5.1	3.29e-07	3.28e-06	1257	1391	1392	914	710	804	759	757
Zic3	209	-1.9	0.37	-5.1	3.3e-07	3.29e-06	118	57	105	77	322	403	301	287
Cnpy1	91	-2.7	0.54	-5.1	3.32e-07	3.31e-06	29	24	30	32	157	285	114	54
Arhgap19	1806	0.7	0.14	5.1	3.33e-07	3.31e-06	2476	2209	2502	1891	1507	1392	1474	998
Auts2	6298	-0.5	0.11	-5.1	3.35e-07	3.34e-06	5239	4930	5280	4759	7539	7597	7401	7641
Rbms2	2244	0.7	0.13	5.1	3.36e-07	3.35e-06	2857	2666	2813	2384	1810	1707	1774	1939
Tubgcp5	1652	-0.7	0.14	-5.1	3.39e-07	3.37e-06	1143	1241	1117	1228	2031	1855	1941	2658
Nras	9194	0.6	0.13	5.1	3.41e-07	3.39e-06	11219	10983	11499	9781	6534	8473	6677	8384
Lyar	1690	0.9	0.17	5.1	3.44e-07	3.42e-06	2397	1694	2486	1805	1200	1155	1184	1602
Gm20682	271	-1.7	0.33	-5.1	3.44e-07	3.42e-06	120	102	130	167	479	242	426	500
Ttyh3	2716	-0.8	0.15	-5.1	3.49e-07	3.46e-06	2363	1762	2316	1885	3542	4033	3525	2305
Gm19694	46	-4.4	0.86	-5.1	3.59e-07	3.56e-06	4	0	7	78	80	57	86	60
Rbm20	206	1.8	0.36	5.1	3.61e-07	3.57e-06	448	258	422	152	94	125	97	54
Phc2	1160	-1	0.2	-5.1	3.67e-07	3.63e-06	875	666	837	863	1425	1928	1425	1259
Fgf10	283	1.4	0.28	5.1	3.74e-07	3.7e-06	453	472	369	95	156	174	146	397
Stk24	1982	0.8	0.15	5.1	3.75e-07	3.71e-06	2231	2904	2201	2164	1342	1436	1484	2098
Uevld	884	1.1	0.21	5.1	3.75e-07	3.71e-06	1284	1143	1386	1009	674	453	685	433
Csmd2	119	-2.2	0.44	-5.1	3.76e-07	3.72e-06	42	63	43	59	173	316	205	53
Evl	512	-1.1	0.22	-5.1	3.77e-07	3.72e-06	353	303	379	371	700	800	752	439
Acbd5	1511	-0.8	0.16	-5.1	3.79e-07	3.74e-06	965	1063	861	1352	1648	1799	1597	2801
Gm37180	75	-4.2	0.84	-5.1	3.79e-07	3.74e-06	1	18	1	13	61	171	60	276
Kif3c	425	-1.2	0.24	-5.1	3.8e-07	3.74e-06	298	242	308	298	694	585	693	281
Rpl30	2865	-0.6	0.13	-5.1	3.84e-07	3.78e-06	1968	2362	2058	2729	2962	3613	3472	3757
Gadd45g	260	-1.8	0.35	-5.1	3.85e-07	3.79e-06	123	70	150	337	358	479	356	211
Osr1	485	1.1	0.22	5.1	3.86e-07	3.79e-06	862	863	791	41	401	350	412	162
Ugdh	1099	0.9	0.18	5.1	3.88e-07	3.81e-06	1597	1393	1676	937	935	721	865	667
Mapk8ip3	1842	-0.7	0.15	-5.1	3.95e-07	3.88e-06	1351	1548	1348	1438	2486	2197	2415	1954
Hoxaas3	391	-1.7	0.33	-5.1	3.99e-07	3.91e-06	179	276	202	45	860	409	855	302
Gm42991	661	-1.2	0.24	-5.1	3.99e-07	3.92e-06	373	466	375	244	1085	685	1100	960
Pcdh10	199	-1.9	0.38	-5.1	4.01e-07	3.93e-06	66	137	70	62	346	294	390	225
Srgn	36	-7.2	1.42	-5.1	4.04e-07	3.96e-06	0	0	1	2	58	33	51	143
Ap2m1	746	-0.9	0.18	-5.1	4.18e-07	4.09e-06	538	563	505	676	1030	1042	984	628
Ptma	5014	0.6	0.11	5.1	4.21e-07	4.12e-06	6151	5934	6166	5400	4198	3917	4244	4103
Rgs18	30	-7.5	1.47	-5.1	4.25e-07	4.16e-06	0	0	0	10	30	34	24	139
Gpx1	1974	-0.8	0.15	-5.1	4.3e-07	4.2e-06	1149	1045	1292	3224	1939	1840	2123	3180
Neurog2	365	-1.3	0.25	-5.1	4.3e-07	4.2e-06	238	247	199	293	520	592	544	287
Fam122b	474	1.3	0.25	5.1	4.31e-07	4.21e-06	557	803	571	823	290	239	268	237
Tspan2	768	1	0.2	5	4.44e-07	4.33e-06	1030	1228	966	790	495	614	468	551
Lrp1b	42	-5.1	1.02	-5	4.55e-07	4.43e-06	0	6	1	33	91	37	79	88
2010107E04Rik	460	-1.3	0.25	-5	4.59e-07	4.48e-06	172	273	196	350	408	667	488	1128
Tfdp1	5139	0.6	0.11	5	4.62e-07	4.5e-06	6287	5777	6367	5283	4102	4271	4034	4990
Sall3	679	-1.1	0.21	-5	4.63e-07	4.51e-06	393	533	398	811	824	1042	883	547
Scube2	936	1	0.19	5	4.65e-07	4.52e-06	1243	989	1308	1669	574	663	580	462
Slc35f1	1007	-0.9	0.18	-5	4.7e-07	4.57e-06	662	637	641	993	1141	1437	1097	1450
Nfia	1921	-2.4	0.48	-5	4.7e-07	4.57e-06	375	1055	411	513	2952	3560	3039	3463
Pwp1	1335	0.8	0.15	5	4.88e-07	4.73e-06	1657	1514	1669	1955	928	984	938	1033
Zdhhc6	854	1.2	0.24	5	4.88e-07	4.73e-06	1234	1034	1267	1079	406	716	407	689
Pkp2	503	1.6	0.32	5	4.89e-07	4.74e-06	682	770	721	518	189	385	143	613
Elmod1	68	-3.6	0.72	-5	4.95e-07	4.79e-06	10	2	23	23	133	163	127	65
Adamts9	1843	0.7	0.14	5	5.02e-07	4.86e-06	2615	2324	2679	906	1598	1506	1565	1549
Zfp395	1123	1	0.2	5	5.1e-07	4.94e-06	1567	1730	1590	1076	684	1075	690	571
Midn	4304	0.7	0.15	5	5.1e-07	4.94e-06	6284	4597	6170	4179	3279	3498	3479	2948
Hnrnpul1	8287	0.5	0.1	5	5.12e-07	4.95e-06	10393	9550	10265	9182	7207	6961	6909	5831
2810474O19Rik	5596	0.6	0.12	5	5.13e-07	4.96e-06	6477	7846	6371	3788	4430	4506	4520	6827
Gm15772	412	-1.2	0.24	-5	5.35e-07	5.17e-06	211	234	217	243	422	613	514	841
Ctsc	380	-1.4	0.28	-5	5.39e-07	5.21e-06	135	197	138	169	469	364	396	1170
Mpp5	4261	0.6	0.12	5	5.48e-07	5.28e-06	5324	5289	5486	3809	3746	3357	3666	3414
Ndnf	1553	-0.8	0.16	-5	5.57e-07	5.37e-06	998	1283	1047	1467	1899	1955	1864	1907
Trim44	8661	0.6	0.12	5	5.69e-07	5.48e-06	11315	10851	10936	7991	7819	6070	7727	6577
Trp53rka	183	2.1	0.41	5	5.8e-07	5.59e-06	356	210	335	238	62	105	52	107
Adam23	1108	-1	0.21	-5	5.83e-07	5.61e-06	671	909	589	561	1575	1280	1579	1703
Uqcrc2	1172	0.8	0.16	5	5.85e-07	5.63e-06	1442	1549	1425	1438	790	929	820	983
Otx2	29	-6.2	1.24	-5	6.03e-07	5.8e-06	1	2	0	5	30	146	42	5
Gata5os	38	4.8	0.97	5	6.05e-07	5.81e-06	108	57	115	12	2	8	1	0
Rftn2	273	-1.5	0.29	-5	6.11e-07	5.87e-06	150	183	133	251	391	486	405	186
Zhx3	1933	-0.7	0.14	-5	6.12e-07	5.87e-06	1595	1518	1503	1381	2440	2698	2347	1978
1010001N08Rik	86	2.5	0.5	5	6.25e-07	5.99e-06	144	171	171	36	33	20	32	79
Notch3	1870	0.7	0.14	5	6.26e-07	5.99e-06	2641	2265	2648	1987	1499	1540	1565	812
Pmaip1	106	-2.9	0.58	-5	6.26e-07	5.99e-06	28	4	22	11	136	106	134	409
Snrnp40	1629	0.7	0.14	5	6.27e-07	6e-06	2008	2037	2035	1836	1196	1298	1267	1356
Akap5	805	1	0.2	5	6.3e-07	6.02e-06	1252	1146	1276	453	558	742	575	438
Amph	282	1.6	0.33	5	6.32e-07	6.05e-06	534	387	576	107	149	212	118	175
Fam83d	275	1.4	0.28	5	6.39e-07	6.11e-06	430	434	407	282	152	177	162	153
Gm19666	28	-6.8	1.37	-5	6.39e-07	6.11e-06	1	1	0	24	73	33	89	2
Epha4	3859	-0.6	0.13	-5	6.55e-07	6.25e-06	2835	3204	2686	2563	4622	4250	4712	5997
Fkbp9	1419	0.9	0.18	5	6.55e-07	6.25e-06	1799	1949	1887	1883	1095	807	1149	782
Tmem200a	73	-3	0.6	-5	6.58e-07	6.27e-06	15	25	19	31	187	79	196	30
Nop2	864	1.2	0.25	5	6.62e-07	6.31e-06	1284	947	1269	1354	623	311	578	544
Tia1	7712	-0.6	0.11	-5	6.62e-07	6.31e-06	5864	6908	5985	5342	8836	9695	9082	9988
G2e3	3489	0.6	0.12	5	6.65e-07	6.32e-06	4166	4391	4042	3615	2836	2697	2830	3331
Zfp568	3900	0.8	0.16	5	6.64e-07	6.32e-06	5121	4681	5298	4024	3371	2235	3218	3253
Atp8a2	150	-2	0.4	-5	6.72e-07	6.38e-06	51	65	67	74	211	337	184	210
Kpna6	1919	0.7	0.14	5	6.72e-07	6.38e-06	2465	2321	2569	1871	1520	1574	1506	1525
Rps2	2103	0.7	0.15	5	6.74e-07	6.4e-06	2043	2244	2229	4443	1091	1571	1305	1901
Kmt2e	12234	-0.5	0.11	-5	6.75e-07	6.41e-06	9413	10715	9366	9242	14218	14342	14042	16532
Fli1	812	-1.2	0.24	-5	6.77e-07	6.42e-06	589	329	544	680	1196	869	1221	1065
Raet1d	75	2.7	0.55	5	6.79e-07	6.44e-06	125	176	126	34	13	34	21	74
Tgfb1i1	798	1	0.2	5	6.83e-07	6.47e-06	1092	1087	1033	1184	496	651	482	358
Vps13c	2804	-0.7	0.15	-5	6.87e-07	6.5e-06	2035	1651	2116	2540	3384	2851	3390	4461
Parp6	823	-0.9	0.18	-5	7.02e-07	6.64e-06	568	590	531	655	977	1181	1025	1062
Lyl1	54	-3.4	0.68	-5	7.09e-07	6.71e-06	10	5	8	68	62	101	72	110
Parl	752	1	0.19	5	7.11e-07	6.72e-06	969	1082	927	1054	461	583	499	442
Ube2b	2138	0.7	0.13	5	7.29e-07	6.89e-06	2659	2850	2618	1832	1736	1637	1768	2002
Sf3b4	598	1	0.2	5	7.3e-07	6.89e-06	815	748	762	889	354	420	381	418
Inpp4b	209	-2.1	0.43	-5	7.33e-07	6.9e-06	115	61	84	114	258	606	282	154
Klf7	1380	-0.9	0.18	-5	7.32e-07	6.9e-06	1023	843	1049	707	1613	2145	1674	1989
Shisa3	605	1.4	0.28	5	7.32e-07	6.9e-06	1051	1015	1085	150	497	229	491	319
Slc25a4	5245	0.5	0.11	5	7.35e-07	6.91e-06	6211	5895	6221	4866	4205	4108	4281	6174
Slc3a2	1618	0.7	0.15	5	7.34e-07	6.91e-06	2067	1789	2053	2195	1166	1247	1129	1296
C330027C09Rik	3094	0.6	0.13	5	7.38e-07	6.94e-06	3607	4160	3597	3163	2340	2582	2439	2865
Cnot1	21379	0.5	0.1	4.9	7.43e-07	6.98e-06	25939	23883	25883	22429	18347	17021	18355	19175
Ska3	994	1	0.2	4.9	7.44e-07	6.99e-06	1395	1473	1302	1115	579	899	608	583
Map3k1	1905	0.7	0.14	4.9	7.45e-07	7e-06	2408	2544	2358	1509	1480	1625	1428	1885
Trps1	3578	-0.7	0.14	-4.9	7.48e-07	7.02e-06	2402	3172	2395	2381	4248	4434	4260	5334
Dlc1	2721	0.8	0.16	4.9	7.5e-07	7.03e-06	4387	3099	4479	1452	2275	2186	2383	1506
Tnrc6c	3666	-0.6	0.12	-4.9	7.5e-07	7.03e-06	2817	3210	2823	2490	4321	4819	4373	4472
Gm45009	208	-2.3	0.46	-4.9	7.6e-07	7.12e-06	31	108	32	524	264	239	272	192
Lonrf2	530	-1.2	0.25	-4.9	7.7e-07	7.21e-06	219	365	280	678	725	580	712	681
Fuca1	314	-1.4	0.27	-4.9	7.81e-07	7.31e-06	183	138	153	347	400	360	443	491
Mobp	33	6	1.21	4.9	7.82e-07	7.32e-06	62	30	75	92	1	0	1	0
Ppbp	31	-7.7	1.57	-4.9	7.84e-07	7.33e-06	0	0	0	41	46	6	57	97
Gm3896	330	-1.5	0.3	-4.9	7.85e-07	7.33e-06	126	217	122	369	441	453	411	500
Mfsd1	1446	0.8	0.15	4.9	7.86e-07	7.34e-06	1929	1728	1786	1633	1077	1161	1000	1250
Ostf1	182	-2	0.41	-4.9	7.98e-07	7.44e-06	40	95	40	233	213	255	227	355
Twistnb	869	1.6	0.32	4.9	8.2e-07	7.64e-06	697	1984	679	1905	348	371	359	612
Tacc2	2060	-0.7	0.14	-4.9	8.31e-07	7.75e-06	1620	1652	1629	1496	2513	2841	2468	2259
Actr2	4679	0.6	0.12	4.9	8.39e-07	7.81e-06	5589	6007	5610	4105	3553	4227	3518	4819
Rpl12	4690	-0.8	0.15	-4.9	8.38e-07	7.81e-06	2770	3005	3136	3259	3965	6566	4659	10165
Gm37899	2505	0.7	0.14	4.9	8.41e-07	7.83e-06	3015	3806	3078	2002	1908	2203	2014	2015
Xkr6	553	-1.1	0.22	-4.9	8.45e-07	7.86e-06	335	335	318	671	629	841	646	649
Cox6a1	815	-0.9	0.19	-4.9	8.48e-07	7.88e-06	432	620	515	780	847	1206	972	1146
Prpf4	1915	0.7	0.14	4.9	8.53e-07	7.93e-06	2303	2328	2142	2512	1507	1297	1420	1808
Slitrk3	33	-7.4	1.5	-4.9	8.63e-07	8.01e-06	1	0	0	0	21	129	35	77
Foxa1	120	2.2	0.45	4.9	8.64e-07	8.02e-06	211	218	203	79	41	67	32	110
Pitpnc1	1535	-0.7	0.14	-4.9	8.68e-07	8.04e-06	1246	1244	1297	1011	1993	2082	2052	1353
Ttc27	898	0.9	0.19	4.9	8.68e-07	8.04e-06	1298	976	1286	1248	595	634	623	524
Kdm4a	822	-1	0.2	-4.9	8.73e-07	8.08e-06	639	512	607	495	1104	1383	1034	799
Krt20	30	5.2	1.06	4.9	8.92e-07	8.26e-06	59	94	40	30	2	0	3	12
C130075A20Rik	133	-2.8	0.56	-4.9	8.94e-07	8.28e-06	12	61	13	128	145	235	148	322
Tomm22	944	0.8	0.17	4.9	8.98e-07	8.3e-06	1160	1215	1241	1247	632	739	672	645
Marf1	4309	-0.6	0.13	-4.9	9.04e-07	8.36e-06	3637	2899	3660	3113	5433	5082	5393	5251
Tfam	1135	0.8	0.16	4.9	9.05e-07	8.36e-06	1338	1458	1429	1314	837	801	829	1075
Ctss	44	-4.4	0.89	-4.9	9.13e-07	8.43e-06	8	0	9	0	113	93	124	6
Nup62	2258	0.9	0.18	4.9	9.23e-07	8.51e-06	3048	2841	3123	2867	1423	2126	1360	1275
Glul	1529	1	0.19	4.9	9.28e-07	8.55e-06	2367	1573	2440	1325	1183	924	1181	1235
Spata13	3041	0.6	0.12	4.9	9.28e-07	8.55e-06	3462	3419	3449	4930	2187	2426	2180	2277
Pitpnb	1644	0.7	0.14	4.9	9.36e-07	8.62e-06	2234	2001	2145	1685	1343	1271	1336	1134
Gm8355	202	1.6	0.33	4.9	9.39e-07	8.64e-06	332	256	264	389	137	75	73	92
Naf1	421	1.3	0.27	4.9	9.39e-07	8.64e-06	491	810	541	499	214	302	214	301
Gm45207	31	-6.7	1.36	-4.9	9.41e-07	8.65e-06	0	1	1	2	86	18	83	59
Psmc1	2073	0.6	0.13	4.9	9.42e-07	8.66e-06	2422	2404	2465	2805	1514	1502	1630	1841
B930036N10Rik	156	2.1	0.43	4.9	9.58e-07	8.8e-06	176	243	172	228	56	25	55	293
Bzrap1	66	-3.5	0.72	-4.9	9.96e-07	9.14e-06	12	6	7	23	53	177	61	192
Bmt2	1883	0.7	0.15	4.9	1.01e-06	9.24e-06	2372	2770	2233	1964	1538	1430	1476	1278
Slco2b1	17	-8	1.64	-4.9	1.01e-06	9.28e-06	0	0	0	6	36	64	32	2
Tardbp	10648	0.6	0.11	4.9	1.02e-06	9.38e-06	12292	13070	12561	10421	7920	9758	8199	10962
Snx21	123	-2.2	0.46	-4.9	1.03e-06	9.46e-06	35	76	34	30	217	243	210	142
Casz1	780	-1.1	0.22	-4.9	1.04e-06	9.51e-06	401	587	385	909	959	903	990	1102
Mettl5	261	1.5	0.3	4.9	1.05e-06	9.58e-06	382	291	412	269	135	139	117	340
Abcg2	1729	0.8	0.16	4.9	1.05e-06	9.6e-06	2454	2043	2294	1835	1395	1120	1452	1240
Slc5a3	2123	0.8	0.15	4.9	1.07e-06	9.77e-06	2795	3102	2642	2030	1868	1434	1774	1338
Gm37812	50	-3.6	0.74	-4.9	1.07e-06	9.78e-06	7	6	8	5	47	149	60	118
Serpinc1	118	2.7	0.56	4.9	1.07e-06	9.8e-06	234	69	283	194	28	23	35	82
Btk	83	-2.9	0.59	-4.9	1.08e-06	9.81e-06	22	6	21	20	138	86	117	251
Epb41l3	2311	-0.7	0.15	-4.9	1.08e-06	9.82e-06	1854	1818	1846	1339	2804	3546	2762	2519
Tagln3	320	-1.3	0.28	-4.9	1.08e-06	9.87e-06	146	211	152	458	423	443	420	310
Hdac7	783	-1.1	0.23	-4.9	1.09e-06	9.91e-06	418	633	433	590	964	1308	913	1007
Pde1c	543	1.1	0.22	4.9	1.09e-06	9.91e-06	725	792	733	683	328	425	330	329
Ipo5	9237	0.5	0.11	4.9	1.1e-06	1e-05	10368	10488	10264	12825	7541	6654	7472	8286
Fbxo9	410	-1.3	0.26	-4.9	1.11e-06	1.01e-05	179	265	184	246	517	508	475	903
Myl4	151	2.6	0.54	4.9	1.11e-06	1.01e-05	267	284	276	204	18	108	27	27
Epha1	127	2.1	0.43	4.9	1.12e-06	1.02e-05	265	163	290	106	56	62	50	26
Nrk	1999	0.7	0.14	4.9	1.12e-06	1.02e-05	2563	3123	2773	406	1767	1695	1784	1882
Hnrnpa1	13512	0.6	0.13	4.9	1.14e-06	1.03e-05	15403	18516	15853	17124	11215	9311	11664	9007
Bmpr1a	8285	0.7	0.15	4.9	1.14e-06	1.04e-05	9562	13284	9447	8456	6712	6158	6837	5820
Vcan	43383	-0.5	0.09	-4.9	1.15e-06	1.04e-05	35675	37001	35376	35793	49008	49379	49349	55483
Hnrnpf	1690	0.7	0.15	4.9	1.16e-06	1.05e-05	2009	2062	1816	2757	1220	1101	1258	1296
Shox2	730	-1.2	0.25	-4.9	1.17e-06	1.06e-05	338	583	337	46	1006	929	920	1685
Ndufa9	462	1.4	0.29	4.9	1.18e-06	1.06e-05	545	797	617	880	290	164	283	119
Ttbk1	55	-3.5	0.71	-4.9	1.18e-06	1.07e-05	13	4	9	42	71	130	72	100
Col1a1	2102	-0.9	0.18	-4.9	1.2e-06	1.08e-05	1546	1364	1507	766	2282	3529	2393	3430
Thsd7b	145	-2	0.42	-4.9	1.21e-06	1.09e-05	56	41	56	37	195	269	155	349
Ran	4730	0.6	0.13	4.9	1.22e-06	1.1e-05	4908	6261	5063	6586	3149	3912	3377	4583
Skil	5145	-0.6	0.13	-4.9	1.22e-06	1.1e-05	3868	4587	4019	2820	6811	5768	6709	6580
Insm1	187	-1.7	0.34	-4.9	1.22e-06	1.1e-05	91	103	83	263	256	345	276	76
Kcng1	128	2.1	0.44	4.9	1.22e-06	1.1e-05	200	263	200	184	64	31	56	24
Gm12892	87	-2.4	0.49	-4.9	1.23e-06	1.1e-05	33	28	29	54	142	200	130	83
Dok6	32	-5.7	1.18	-4.9	1.23e-06	1.11e-05	0	5	0	36	93	64	62	0
Ube2ql1	53	-3.2	0.67	-4.9	1.23e-06	1.11e-05	19	6	11	34	94	126	106	32
Prkd1	506	1.1	0.22	4.9	1.23e-06	1.11e-05	752	708	864	280	390	360	364	334
Xpo4	2972	0.6	0.13	4.8	1.24e-06	1.11e-05	3421	3775	3602	4000	2415	2216	2435	1915
Gm38042	640	-1.1	0.23	-4.8	1.24e-06	1.12e-05	391	501	448	453	1051	760	1051	461
Rsph4a	53	3.8	0.78	4.8	1.27e-06	1.14e-05	70	54	70	30	10	0	5	186
Gas1	1603	0.8	0.16	4.8	1.29e-06	1.16e-05	1988	2444	1925	1384	1171	1310	1295	1306
Gabrg2	40	-4.7	0.97	-4.8	1.29e-06	1.16e-05	3	0	4	12	75	27	83	115
Cdc27	8142	0.6	0.13	4.8	1.29e-06	1.16e-05	9350	11229	9339	8546	6161	7356	6015	7142
Kcns3	24	7.4	1.53	4.8	1.3e-06	1.16e-05	42	108	28	2	0	0	1	11
Rhd	45	-4.1	0.85	-4.8	1.3e-06	1.16e-05	1	11	2	65	86	79	63	53
Frmd4b	3303	-0.6	0.12	-4.8	1.31e-06	1.18e-05	2735	2708	2834	2247	4194	3950	4173	3581
Adgrb3	480	-1.2	0.25	-4.8	1.33e-06	1.18e-05	287	230	345	345	712	580	677	664
Tacc3	2632	0.7	0.15	4.8	1.33e-06	1.19e-05	3110	3140	3259	2605	1782	2302	1740	3120
Smad9	281	1.4	0.28	4.8	1.34e-06	1.2e-05	448	561	431	110	166	214	178	143
Alpk2	36	4.5	0.94	4.8	1.37e-06	1.22e-05	53	110	56	46	5	0	4	17
Anks1b	76	-3.1	0.64	-4.8	1.37e-06	1.22e-05	9	37	12	17	170	112	170	85
Tipin	1357	0.8	0.17	4.8	1.37e-06	1.22e-05	1422	1850	1452	2311	912	851	914	1145
Bcl7b	144	-1.8	0.38	-4.8	1.38e-06	1.23e-05	66	73	55	175	208	266	225	85
Gm44129	24	-5.7	1.19	-4.8	1.38e-06	1.23e-05	1	0	2	4	76	57	55	0
Micu2	778	1.2	0.25	4.8	1.38e-06	1.23e-05	1215	1236	1124	901	374	767	444	166
Slc37a1	92	-2.4	0.51	-4.8	1.39e-06	1.23e-05	29	28	36	61	142	243	124	71
Rbp1	576	-1	0.21	-4.8	1.39e-06	1.24e-05	353	430	375	240	795	726	801	886
Dhtkd1	491	1.2	0.25	4.8	1.39e-06	1.24e-05	714	830	667	579	277	415	280	165
Spint2	101	2.3	0.48	4.8	1.4e-06	1.25e-05	183	215	199	44	37	27	56	50
Bri3bp	1050	1.1	0.23	4.8	1.41e-06	1.25e-05	1611	1063	1725	1589	749	507	779	381
Ago1	4956	-0.6	0.13	-4.8	1.42e-06	1.26e-05	3980	3527	4043	3739	6150	5217	6304	6693
Gm19653	215	-2.1	0.43	-4.8	1.42e-06	1.26e-05	55	61	65	182	169	462	157	566
Phgdh	405	1.2	0.24	4.8	1.43e-06	1.27e-05	608	542	565	670	269	224	277	85
Daxx	634	0.9	0.2	4.8	1.43e-06	1.27e-05	818	815	809	893	386	457	428	465
Cul1	6500	0.6	0.12	4.8	1.44e-06	1.27e-05	7331	8713	7295	8094	5249	5088	5321	4913
Klhl21	251	1.8	0.38	4.8	1.44e-06	1.27e-05	357	352	333	438	133	45	120	230
Ercc5	1429	-0.7	0.15	-4.8	1.45e-06	1.28e-05	1019	1094	1046	1262	1817	1605	1809	1782
Nexn	978	1	0.22	4.8	1.45e-06	1.28e-05	1102	1457	1102	977	501	786	496	1404
Fam199x	913	0.9	0.19	4.8	1.46e-06	1.29e-05	1304	1184	1229	944	694	546	741	663
Gm42798	163	1.7	0.35	4.8	1.48e-06	1.31e-05	278	238	242	234	81	81	73	77
Rab5c	776	0.9	0.19	4.8	1.49e-06	1.32e-05	1092	947	1119	887	542	600	548	471
Cd151	339	1.4	0.3	4.8	1.52e-06	1.34e-05	640	383	606	389	225	149	223	97
Sstr2	93	-2.3	0.48	-4.8	1.55e-06	1.36e-05	33	36	29	55	144	200	136	116
Edil3	417	-1.3	0.28	-4.8	1.55e-06	1.37e-05	200	327	186	323	620	571	613	498
Rps28	577	-1	0.21	-4.8	1.55e-06	1.37e-05	372	331	412	379	682	834	758	846
Tmprss2	28	5.4	1.12	4.8	1.58e-06	1.39e-05	69	34	73	48	3	0	1	0
Eif5	14067	0.6	0.12	4.8	1.62e-06	1.43e-05	14418	17773	14604	20390	10623	10017	10895	13818
Tspan11	128	-2.5	0.53	-4.8	1.63e-06	1.44e-05	67	18	41	89	177	328	174	130
Rbms1	4820	0.6	0.13	4.8	1.66e-06	1.46e-05	5754	6709	5966	3255	3623	4643	3758	4854
Zfp521	4284	-0.6	0.12	-4.8	1.66e-06	1.46e-05	3309	3773	3246	3250	5361	4908	5315	5109
3110082I17Rik	319	1.3	0.27	4.8	1.66e-06	1.46e-05	386	401	428	724	149	200	145	121
Maea	1193	0.9	0.18	4.8	1.66e-06	1.46e-05	1761	1308	1773	1466	884	875	911	566
Vegfa	1157	1	0.21	4.8	1.67e-06	1.46e-05	1349	2150	1386	1401	834	694	859	586
Clcn2	425	-1.2	0.24	-4.8	1.68e-06	1.48e-05	250	302	286	390	558	745	561	310
Ptprn	81	-2.7	0.56	-4.8	1.69e-06	1.48e-05	21	25	9	41	112	139	107	193
Arhgap25	61	-3.2	0.67	-4.8	1.69e-06	1.48e-05	7	6	14	25	68	139	55	177
Iigp1	36	-6.2	1.29	-4.8	1.69e-06	1.48e-05	0	1	1	8	58	23	53	145
Rad51	1248	0.9	0.19	4.8	1.69e-06	1.48e-05	1300	1922	1282	1890	717	881	800	1190
Ppp2r5a	1170	1	0.21	4.8	1.71e-06	1.49e-05	1665	1578	1556	1290	903	534	937	897
Tyms	2471	0.7	0.14	4.8	1.72e-06	1.5e-05	3168	2646	3218	3029	1869	1932	1897	2012
B4galt4	271	1.5	0.32	4.8	1.73e-06	1.51e-05	472	279	455	301	139	116	155	248
2900037B21Rik	568	-5.6	1.17	-4.8	1.74e-06	1.51e-05	33	1	36	20	1044	1107	1110	1190
Cox7a2	636	-1.1	0.23	-4.8	1.74e-06	1.52e-05	307	423	396	484	620	1118	710	1031
Tfec	28	-5.9	1.23	-4.8	1.76e-06	1.53e-05	1	0	1	10	56	34	53	68
Zfp516	4443	0.7	0.15	4.8	1.78e-06	1.55e-05	6777	5036	6581	3818	4085	3028	4016	2205
Psrc1	724	1.1	0.24	4.8	1.79e-06	1.56e-05	1012	927	978	992	366	609	363	548
Olfr1373	23	7.3	1.53	4.8	1.81e-06	1.57e-05	56	43	64	23	0	0	1	0
Aplp1	252	-1.5	0.32	-4.8	1.81e-06	1.58e-05	117	146	109	122	306	463	308	444
Rpl34	712	1	0.21	4.8	1.83e-06	1.59e-05	973	795	1031	1199	411	544	429	310
Zdhhc21	3094	0.6	0.12	4.8	1.84e-06	1.6e-05	3939	3583	3796	2873	2522	2569	2503	2969
Igsf21	60	-3.4	0.7	-4.8	1.85e-06	1.61e-05	5	16	7	16	112	50	111	168
C230071H17Rik	165	-1.8	0.38	-4.8	1.85e-06	1.61e-05	64	98	64	40	283	224	279	266
4930579G18Rik	304	1.6	0.34	4.8	1.86e-06	1.61e-05	511	234	509	258	128	125	143	527
Ptpn14	1796	0.7	0.15	4.8	1.86e-06	1.61e-05	2602	2102	2627	1948	1473	1448	1515	652
Atp2b4	998	-1	0.21	-4.8	1.95e-06	1.69e-05	701	486	812	633	1435	1217	1386	1317
Gspt2	247	1.4	0.29	4.8	1.95e-06	1.69e-05	351	415	410	307	138	164	155	39
Sox5	1544	-0.9	0.19	-4.8	1.95e-06	1.69e-05	1186	1115	1143	1051	2440	1552	2485	1383
Dlgap1	142	-1.9	0.39	-4.8	1.96e-06	1.7e-05	42	51	40	77	165	140	183	438
Casp2	2261	0.6	0.13	4.8	2.01e-06	1.73e-05	2940	2866	2963	2378	2075	1741	1862	1262
Fam135b	20	-8.1	1.7	-4.8	2.01e-06	1.73e-05	0	0	0	2	18	126	17	0
Ccne1	514	1.2	0.26	4.8	2.02e-06	1.75e-05	798	668	818	637	268	437	268	214
Dopey1	1788	-0.7	0.15	-4.8	2.02e-06	1.75e-05	1214	1484	1248	1512	2145	2199	2070	2436
Xpnpep3	1220	0.8	0.18	4.7	2.06e-06	1.78e-05	1499	1697	1470	1042	933	714	943	1465
Phf14	5933	-0.5	0.12	-4.7	2.07e-06	1.78e-05	4482	5027	4383	4962	6592	7125	6586	8307
Tvp23b	251	1.6	0.33	4.7	2.08e-06	1.79e-05	380	363	355	394	108	171	94	142
Celf1	6787	0.6	0.12	4.7	2.08e-06	1.79e-05	8286	7870	8299	7090	5739	4827	5907	6281
Gm45072	25	-7.4	1.55	-4.7	2.08e-06	1.79e-05	0	0	0	0	23	41	20	113
Zfp423	3326	-0.6	0.12	-4.7	2.11e-06	1.82e-05	2679	2419	2708	3049	4183	3614	3958	3994
Slc16a3	414	1.4	0.29	4.7	2.12e-06	1.82e-05	587	527	529	608	247	126	256	433
Sbf2	5705	-0.6	0.13	-4.7	2.17e-06	1.87e-05	4361	5213	4264	4070	6639	7527	6701	6865
Col9a3	130	-2.5	0.53	-4.7	2.17e-06	1.87e-05	25	46	26	33	97	372	118	323
6330403K07Rik	833	-1.3	0.28	-4.7	2.18e-06	1.87e-05	432	689	405	593	1489	832	1449	778
Ube2z	780	0.9	0.2	4.7	2.2e-06	1.89e-05	1100	1010	1086	845	567	460	633	538
Col6a2	202	-1.5	0.32	-4.7	2.2e-06	1.89e-05	124	110	124	114	340	316	352	139
Gm43528	71	-3.3	0.7	-4.7	2.21e-06	1.89e-05	15	8	7	91	128	27	133	162
Gm44102	285	-1.5	0.32	-4.7	2.22e-06	1.9e-05	100	162	100	292	282	474	301	566
Gm37612	76	2.6	0.55	4.7	2.22e-06	1.9e-05	140	97	159	56	32	17	19	89
Rnf214	1239	-0.8	0.16	-4.7	2.22e-06	1.9e-05	995	799	957	1042	1585	1516	1555	1460
Gpr146	177	-1.6	0.34	-4.7	2.25e-06	1.92e-05	88	96	87	194	309	236	290	118
Afap1	2604	-0.6	0.13	-4.7	2.26e-06	1.94e-05	2141	1997	2157	1247	3110	3282	3128	3771
Zmat3	3528	0.5	0.11	4.7	2.27e-06	1.94e-05	4132	4269	4249	4468	2823	2940	2926	2416
Abcd2	443	-1.3	0.27	-4.7	2.27e-06	1.94e-05	213	339	210	308	567	702	552	655
Trim35	1833	0.7	0.15	4.7	2.28e-06	1.95e-05	2291	2207	2319	2419	1407	1188	1533	1305
Srf	1188	0.9	0.19	4.7	2.3e-06	1.96e-05	1812	1356	1783	839	938	760	987	1030
Gm44094	25	-7.3	1.55	-4.7	2.31e-06	1.97e-05	0	0	1	7	35	105	22	32
Igf2bp2	6849	0.5	0.11	4.7	2.32e-06	1.97e-05	8296	8170	8413	6431	5972	5630	6004	5876
Tsnax	1428	0.7	0.15	4.7	2.32e-06	1.98e-05	1789	1558	1724	2152	1070	920	1071	1137
Gdi2	10041	-0.6	0.13	-4.7	2.36e-06	2.01e-05	6819	8695	6764	9161	11313	10922	11377	15278
Snrpg	955	-0.9	0.2	-4.7	2.37e-06	2.01e-05	579	557	646	550	939	1455	1063	1850
Fam228a	99	-2.7	0.58	-4.7	2.37e-06	2.02e-05	12	12	18	45	125	40	110	432
Tubg1	741	1.1	0.24	4.7	2.38e-06	2.02e-05	1223	748	1266	739	478	535	470	470
Sla	41	-3.7	0.77	-4.7	2.38e-06	2.02e-05	8	4	6	43	57	102	58	54
Nr1h5	159	2.4	0.51	4.7	2.39e-06	2.03e-05	293	409	304	16	88	18	86	60
Npdc1	238	-2	0.43	-4.7	2.44e-06	2.07e-05	105	35	130	188	338	449	326	332
Bmp10	106	3.9	0.82	4.7	2.44e-06	2.07e-05	257	218	263	16	5	57	1	32
Atp11a	2250	-0.6	0.13	-4.7	2.45e-06	2.08e-05	1689	1813	1724	1423	2608	2933	2559	3248
Zfp57	2151	-0.9	0.19	-4.7	2.47e-06	2.09e-05	1245	2002	1325	1277	3053	2479	2966	2865
Rpp40	352	1.3	0.27	4.7	2.5e-06	2.12e-05	446	529	411	503	190	163	220	350
Tmco3	314	-1.3	0.28	-4.7	2.51e-06	2.12e-05	197	156	228	217	506	527	430	249
4932443L11Rik	71	-2.8	0.59	-4.7	2.56e-06	2.16e-05	7	9	9	0	45	74	59	367
Mybpc3	71	3.6	0.76	4.7	2.56e-06	2.16e-05	178	96	173	89	18	0	19	0
Tmem39a	2387	0.8	0.17	4.7	2.56e-06	2.16e-05	2791	3814	2813	2265	1594	2203	1630	1989
B4galt1	916	0.9	0.19	4.7	2.58e-06	2.18e-05	1283	1139	1280	1121	726	524	724	536
Ttc9c	1984	0.7	0.15	4.7	2.66e-06	2.25e-05	2315	2930	2330	2135	1546	1576	1519	1522
Mir1190	29	-7.1	1.52	-4.7	2.69e-06	2.27e-05	0	0	1	2	25	105	21	79
Col23a1	713	-1	0.21	-4.7	2.71e-06	2.29e-05	458	521	447	585	862	1172	827	829
Ube2j2	574	1	0.2	4.7	2.73e-06	2.3e-05	663	756	677	710	339	386	355	710
Pdia6	2449	0.6	0.13	4.7	2.75e-06	2.32e-05	2970	2870	3074	2627	1812	2101	1921	2218
Anks1	563	-1	0.21	-4.7	2.77e-06	2.34e-05	353	434	357	381	694	841	741	707
Atp5e	380	-1.1	0.24	-4.7	2.79e-06	2.35e-05	212	246	262	381	486	539	531	378
Extl2	370	1.2	0.26	4.7	2.81e-06	2.36e-05	583	540	469	512	218	214	261	163
Uba7	138	-2.7	0.58	-4.7	2.81e-06	2.36e-05	21	4	35	164	126	129	132	489
E130307A14Rik	907	-0.9	0.18	-4.7	2.9e-06	2.44e-05	581	737	596	684	1107	1250	1103	1196
Gsx1	23	-7.4	1.58	-4.7	2.91e-06	2.45e-05	0	0	0	4	15	58	18	89
Cdk11b	3269	0.6	0.12	4.7	2.93e-06	2.46e-05	3947	3887	3921	2998	2537	2844	2516	3499
Irf8	65	-2.7	0.57	-4.7	2.93e-06	2.46e-05	16	12	18	80	102	85	103	104
Gm42741	92	-2.9	0.62	-4.7	2.94e-06	2.47e-05	11	38	7	89	137	118	146	195
Fam169a	969	1.1	0.23	4.7	2.95e-06	2.48e-05	1003	1727	979	1342	572	590	587	954
Gm16150	120	-2	0.44	-4.7	2.96e-06	2.48e-05	59	52	43	63	258	136	242	106
Nrxn2	82	-2.4	0.51	-4.7	2.96e-06	2.48e-05	25	18	26	96	157	95	116	124
Rwdd4a	765	0.9	0.2	4.7	2.96e-06	2.48e-05	936	1014	945	832	558	426	545	867
Zfp933	488	1.1	0.24	4.7	2.97e-06	2.48e-05	728	678	707	363	380	251	354	441
Snap47	341	1.2	0.26	4.7	2.98e-06	2.5e-05	505	444	520	363	205	236	196	263
Gm11870	302	-1.4	0.3	-4.7	3e-06	2.51e-05	173	135	194	318	410	548	375	266
1700063H04Rik	30	-6.3	1.34	-4.7	3.01e-06	2.52e-05	0	2	0	84	46	41	48	20
Rps27a	1850	-0.7	0.15	-4.7	3.02e-06	2.52e-05	1159	1458	1284	1376	1842	2431	2037	3214
Usp33	2116	-0.6	0.14	-4.7	3.02e-06	2.52e-05	1826	1503	1714	1656	2645	2534	2708	2338
Bcl2l13	1461	0.8	0.17	4.7	3.03e-06	2.53e-05	1896	1525	1905	2108	951	1151	975	1172
Srgap1	1956	-0.8	0.16	-4.7	3.11e-06	2.6e-05	1382	1125	1420	1350	2049	2500	2078	3744
Mapk4	264	-1.7	0.37	-4.7	3.12e-06	2.6e-05	152	77	131	147	315	555	325	411
Gpd1	75	2.5	0.53	4.7	3.12e-06	2.6e-05	152	100	149	63	25	24	24	63
Spdl1	1452	0.9	0.18	4.7	3.16e-06	2.63e-05	2052	1765	1925	1373	971	1308	909	1309
Ccdc117	1157	1.1	0.23	4.7	3.18e-06	2.65e-05	1553	1509	1439	1522	585	1029	569	1048
Gm43788	423	-1.1	0.24	-4.7	3.2e-06	2.66e-05	257	203	265	545	540	518	510	547
Sorbs2os	61	-2.7	0.59	-4.7	3.24e-06	2.7e-05	16	24	19	22	115	181	99	17
Cdh19	30	-4.9	1.05	-4.7	3.26e-06	2.71e-05	4	1	1	78	75	25	55	0
Gm10222	58	2.8	0.6	4.7	3.29e-06	2.74e-05	127	119	92	59	16	20	14	18
Atp9a	110	-2.3	0.5	-4.6	3.34e-06	2.77e-05	40	39	46	53	257	105	275	62
Tpi1	1182	1	0.22	4.6	3.34e-06	2.77e-05	1504	1422	1479	2268	544	1032	621	584
Ivns1abp	12199	0.7	0.14	4.6	3.35e-06	2.78e-05	13088	17916	12876	17163	9504	8723	9590	8735
Ssh2	2811	-0.7	0.14	-4.6	3.37e-06	2.79e-05	2274	1737	2306	2551	3487	3280	3288	3564
Sox13	783	1.2	0.27	4.6	3.37e-06	2.79e-05	1347	736	1265	1281	400	603	408	225
Epb41	10768	-0.6	0.13	-4.6	3.39e-06	2.81e-05	8949	6903	9072	9148	12841	11835	12872	14526
Gm42549	402	-1.2	0.25	-4.6	3.44e-06	2.85e-05	248	164	208	279	471	428	486	930
Iqsec1	1867	-0.7	0.14	-4.6	3.48e-06	2.88e-05	1439	1449	1450	1610	2135	2537	2187	2128
Arhgef28	221	-1.6	0.35	-4.6	3.49e-06	2.89e-05	114	133	117	131	309	525	290	151
Arhgef40	1428	-0.8	0.17	-4.6	3.5e-06	2.89e-05	1163	915	1222	818	1847	2016	1827	1613
Rab18	1078	0.8	0.18	4.6	3.51e-06	2.9e-05	1379	1528	1401	1031	728	971	746	843
Cmtm4	1327	0.7	0.16	4.6	3.53e-06	2.91e-05	1922	1658	1908	1319	1150	975	1153	532
Mcm10	1415	0.9	0.19	4.6	3.55e-06	2.93e-05	1973	1594	1941	2118	1048	733	1158	758
Gm20648	85	2.3	0.5	4.6	3.58e-06	2.95e-05	162	124	148	69	36	20	31	89
Cd53	38	-6.4	1.38	-4.6	3.62e-06	2.98e-05	1	0	0	2	20	108	25	145
Gm5464	26	-4.5	0.96	-4.6	3.65e-06	3.01e-05	1	6	2	3	58	75	60	6
Lyn	202	-1.5	0.33	-4.6	3.65e-06	3.01e-05	83	112	105	204	228	361	272	251
Atad3a	893	0.8	0.17	4.6	3.68e-06	3.02e-05	1075	1174	1087	1364	683	603	619	541
Clmp	1458	-0.7	0.15	-4.6	3.67e-06	3.02e-05	1307	1125	1275	463	2044	1894	2042	1513
Lhx6	47	-4	0.86	-4.6	3.69e-06	3.04e-05	13	2	6	1	55	174	66	56
Foxa2	37	3.9	0.84	4.6	3.72e-06	3.06e-05	60	41	51	89	3	3	4	47
Dcaf12	696	1	0.22	4.6	3.74e-06	3.07e-05	974	736	924	1199	376	508	426	429
Gnl3l	2501	0.6	0.13	4.6	3.74e-06	3.07e-05	3025	3157	3071	2421	2099	1891	2117	2227
Siglech	20	-7.5	1.62	-4.6	3.75e-06	3.08e-05	0	0	0	1	47	11	36	63
Cthrc1	213	-1.6	0.36	-4.6	3.76e-06	3.09e-05	100	90	133	100	298	450	267	266
Sox2ot	1030	-0.8	0.17	-4.6	3.83e-06	3.14e-05	641	618	578	2079	1113	936	1138	1136
Ckap2	1473	0.7	0.16	4.6	3.86e-06	3.16e-05	1925	1688	1849	1612	1053	1220	1037	1397
Ergic3	671	0.9	0.2	4.6	3.86e-06	3.16e-05	765	833	770	1123	473	354	411	640
Ing5	767	1	0.22	4.6	3.9e-06	3.19e-05	1004	1052	997	961	440	664	437	584
Gcsh	1001	0.9	0.19	4.6	3.91e-06	3.2e-05	1082	1348	1137	1600	563	801	598	876
Trpc6	26	-5.2	1.12	-4.6	3.92e-06	3.21e-05	2	1	1	37	44	78	29	14
Kmt2a	13854	-0.5	0.1	-4.6	3.92e-06	3.21e-05	11585	10853	11639	12072	15570	16295	15268	17548
Cpox	1898	-0.7	0.16	-4.6	3.94e-06	3.21e-05	846	878	781	4940	1211	1675	1337	3514
Mettl16	2197	0.7	0.15	4.6	3.95e-06	3.23e-05	2703	2673	2644	2782	1804	1377	1791	1805
Pcdh8	121	-2	0.43	-4.6	3.99e-06	3.25e-05	48	41	41	155	139	224	156	163
Ptprr	32	-5.6	1.21	-4.6	4.02e-06	3.28e-05	1	2	0	0	38	65	25	124
[truncated: 3,336 more rows]

## Sheet: LoF
gene	baseMean	log2FoldChange	lfcMLE	lfcSE	stat	pvalue	padj	Wt_1	Wt_1	Mu_1	Mu_2
mt-Co1	96669.4	-0.473208	-0.483314	0.0382743	-12.3636	4.11259e-35	6.49912e-31	109607	115815	81356.8	79898.7
Hoxb1	400.733	-1.47332	-2.09043	0.121045	-12.1716	4.40312e-34	3.47913e-30	682.05	616.534	137.399	166.951
mt-Nd1	60139.2	-0.318405	-0.322379	0.0295152	-10.7878	3.92918e-27	2.06976e-23	66711.3	66950.2	53225.8	53669.5
Fbn2	8130.05	0.600226	0.629584	0.0563963	10.643	1.87952e-26	7.4255e-23	6382.8	6385.6	9392.37	10359.4
Rn18s-rs5	5172	0.701084	0.749969	0.0660191	10.6194	2.42054e-26	7.65035e-23	3664.16	4048.35	6764.35	6211.14
Sox10	856.773	0.962777	1.12277	0.0933201	10.3169	5.90792e-25	1.55605e-21	552.439	526.122	1223.26	1125.27
Usp11	2163.9	0.631601	0.672924	0.0641935	9.83903	7.64478e-23	1.72586e-19	1712.56	1624.53	2656.73	2661.78
Ide	6848.29	0.406494	0.417502	0.0428564	9.48504	2.42293e-21	4.7862e-18	5848.42	5879.68	7876.88	7788.21
Pfkp	2502.66	0.702001	0.769893	0.0758298	9.25759	2.09104e-20	3.67163e-17	1769.93	1930.4	2980.74	3329.58
Il17rd	3587.47	0.491548	0.516178	0.0570115	8.6219	6.5853e-18	1.04068e-14	3034.17	2872.03	4143.51	4300.16
mt-Nd4	26499.4	-0.409526	-0.425598	0.0509917	-8.03123	9.65022e-16	1.38639e-12	29257	31502.9	21907	23330.7
Podxl	33866.5	-0.471016	-0.497069	0.0596112	-7.90147	2.75637e-15	3.62991e-12	40472.5	38813.8	29912	26267.9
Loxl2	5537.1	0.416285	0.434113	0.0530763	7.84314	4.39407e-15	5.34149e-12	4872.09	4549.46	6439.31	6287.54
Gm8494	47.2694	0.93323	5.52168	0.119744	7.79357	6.51434e-15	7.35329e-12	1.06238	2.88549	97.41	87.7199
Actn2	1221.59	0.735727	0.868258	0.0961224	7.65406	1.94727e-14	2.05152e-11	892.402	837.755	1438.59	1717.61
Ezr	10149.7	-0.540745	-0.585846	0.0712982	-7.58426	3.34378e-14	3.30261e-11	12036.8	12326.8	8812.01	7423.18
Gys1	2835.33	0.481431	0.512665	0.0639745	7.52536	5.25771e-14	4.70434e-11	2345.74	2328.59	3194.02	3472.95
mt-Cytb	89098.4	-0.303961	-0.311232	0.0404049	-7.52288	5.35836e-14	4.70434e-11	97825.3	99519.8	76990.8	82057.7
Rsad1	200.215	-0.954381	-1.58698	0.130519	-7.31222	2.62757e-13	2.18545e-10	303.841	297.206	92.2831	107.528
Dusp9	5020.95	-0.523532	-0.56959	0.0729152	-7.18001	6.97045e-13	5.24899e-10	5805.92	6191.31	4348.59	3738
Scube1	1800.11	0.583989	0.651189	0.0813364	7.17992	6.97519e-13	5.24899e-10	1495.83	1306.17	2262.99	2135.46
P4ha2	1725.37	0.549404	0.606082	0.0778532	7.05692	1.70236e-12	1.22284e-09	1434.22	1303.28	2008.7	2155.27
Sdc3	2190.57	0.59862	0.678967	0.0863648	6.9313	4.16997e-12	2.86513e-09	1848.55	1521.62	2669.03	2723.09
Dusp6	3242.97	0.366777	0.382565	0.0532035	6.89386	5.42987e-12	3.57534e-09	2796.19	2834.52	3673.89	3667.26
Zfp516	5627.23	0.349217	0.363682	0.0522751	6.68036	2.3836e-11	1.50672e-08	4971.95	4872.64	6129.65	6534.66
Kbtbd11	1383.49	0.695577	0.8564	0.104386	6.66352	2.67349e-11	1.62497e-08	1080.44	889.694	1617.01	1946.82
Tfap2b	463.441	0.735192	0.942838	0.110657	6.64388	3.05537e-11	1.7883e-08	322.964	311.633	583.434	635.734
Med1	3809.56	0.402374	0.425944	0.0611578	6.57928	4.7272e-11	2.668e-08	3141.47	3360.64	4226.57	4509.56
Apcdd1	1752.67	0.508467	0.561324	0.0780935	6.51101	7.46483e-11	4.06781e-08	1492.65	1339.83	2151.22	2026.99
Myom1	1691.86	0.568092	0.648821	0.088264	6.43628	1.22434e-10	6.44943e-08	1305.67	1330.21	1886.68	2244.88
Pdk1	5219.29	0.506821	0.561134	0.0790796	6.40899	1.46485e-10	7.46745e-08	4535.31	3900.23	5834.34	6607.29
Dhcr24	8963.41	-0.262046	-0.26861	0.0413018	-6.34466	2.22916e-10	1.10086e-07	9892.91	9698.15	8188.59	8074
Ddx3x	37732.8	-0.314728	-0.326562	0.0499884	-6.29603	3.05365e-10	1.46233e-07	43676.7	40295.9	32577	34381.5
Pou5f1	298.443	-0.807701	-1.26922	0.128398	-6.2906	3.16247e-10	1.4699e-07	401.581	442.443	150.729	199.02
Herc3	832.875	-0.569682	-0.659335	0.0916385	-6.21662	5.07979e-10	2.2936e-07	981.642	1058.01	642.906	648.939
Bmf	2561.9	0.369975	0.390547	0.05975	6.19206	5.93834e-10	2.60676e-07	2171.51	2262.23	2929.48	2884.38
Ngfr	442.079	0.820418	1.49553	0.132949	6.17091	6.78975e-10	2.89996e-07	240.099	223.145	490.126	814.946
Myl2	700.614	0.775462	1.16571	0.126021	6.15345	7.58154e-10	3.15292e-07	518.443	346.259	1040.75	897.007
P4ha1	5402.29	0.306957	0.318507	0.0500035	6.13871	8.31923e-10	3.37099e-07	4881.65	4735.1	6125.55	5866.86
Ehd1	6680.69	-0.39969	-0.426806	0.065241	-6.12637	8.99073e-10	3.50167e-07	7622.6	7699.46	6086.58	5314.13
Hk1	1270.35	0.473309	0.521253	0.0772786	6.12471	9.08489e-10	3.50167e-07	1066.63	1020.5	1477.56	1516.71
Myh7	7225.1	0.779346	1.20306	0.127628	6.10636	1.01928e-09	3.83516e-07	4442.88	4309.01	8704.35	11444.1
Mdc1	7969.73	0.290061	0.299877	0.0475959	6.09425	1.09954e-09	4.04095e-07	7249.7	7040.61	8575.15	9013.46
Aldoa	38155.2	0.284592	0.293913	0.0468742	6.07139	1.26804e-09	4.55429e-07	35379.5	33187	40865	43189.3
Arrdc3	2612.94	0.549451	0.63462	0.0911556	6.02762	1.66392e-09	5.84332e-07	2190.63	1905.39	2888.46	3467.29
Dmxl1	3463.11	-0.379194	-0.403247	0.0633426	-5.9864	2.1454e-09	7.3704e-07	4050.87	3836.75	3106.87	2857.97
Ptprs	6912.15	0.255933	0.262862	0.0428533	5.97229	2.33943e-09	7.86597e-07	6273.37	6295.19	7485.19	7594.85
Skida1	2001.3	0.446643	0.48869	0.0749952	5.95562	2.59083e-09	8.52976e-07	1743.37	1588.95	2250.68	2422.2
Pgm2	2745.01	0.372924	0.396108	0.0627829	5.93989	2.85211e-09	9.19836e-07	2462.6	2279.54	3100.71	3137.17
Ppp1r10	3106.39	0.356146	0.376199	0.060086	5.92727	3.08017e-09	9.73518e-07	2649.58	2756.61	3613.4	3405.98
Msx3	339.639	0.766992	1.25203	0.130055	5.89743	3.69213e-09	1.10134e-06	234.787	167.359	517.811	438.6
Nr2f2	2158.53	0.394181	0.422447	0.0668309	5.89819	3.67513e-09	1.10134e-06	1786.93	1901.54	2523.43	2422.2
Ttn	3122.26	0.394306	0.422607	0.0668614	5.89736	3.69366e-09	1.10134e-06	2672.96	2664.27	3382.69	3769.13
Celf2	1640.47	0.448107	0.491971	0.0762042	5.88034	4.09418e-09	1.18681e-06	1431.03	1296.55	1944.1	1890.22
Nrp1	3385.6	-0.390684	-0.41834	0.0664556	-5.87888	4.13051e-09	1.18681e-06	3864.95	3880.03	3065.85	2731.58
Plp1	751.174	0.56728	0.67186	0.0969023	5.85414	4.79471e-09	1.35305e-06	602.371	556.9	888.994	956.43
Actc1	19401.6	0.348715	0.368277	0.059989	5.81299	6.13654e-09	1.70133e-06	17619.6	16259.8	20734	22993
Greb1l	11000.4	-0.31987	-0.334742	0.055118	-5.80337	6.4995e-09	1.77089e-06	12015.5	12526.9	9281.63	10177.4
Emilin2	1493.54	0.431831	0.47193	0.0745729	5.79072	7.00856e-09	1.87722e-06	1213.24	1288.85	1766.71	1705.35
Cyp26b1	253.995	0.750554	1.25452	0.130879	5.73472	9.76735e-09	2.57256e-06	163.607	136.58	398.868	316.924
Fam162a	4789.68	0.412418	0.447623	0.0719981	5.72819	1.0151e-08	2.62976e-06	4345.15	3761.72	5346.27	5705.57
Hif1a	9012.8	-0.228854	-0.234246	0.0401141	-5.70507	1.16296e-08	2.96424e-06	9787.73	9698.15	8305.48	8259.82
Clk1	3958.28	-0.413841	-0.450753	0.0733453	-5.64237	1.67726e-08	4.20725e-06	4231.47	4911.11	3276.05	3414.47
Slc9a5	725.934	0.573925	0.697234	0.101997	5.6269	1.83482e-08	4.53057e-06	522.692	584.794	852.081	944.168
Eif2s3x	1160.18	-0.493165	-0.562318	0.0878242	-5.61537	1.96146e-08	4.76876e-06	1418.28	1349.45	879.766	993.216
Miat	1160.84	0.539209	0.638863	0.0970233	5.55752	2.73634e-08	6.55189e-06	874.341	941.633	1289.91	1537.46
Slc39a4	622.981	-0.719411	-1.15721	0.12955	-5.55314	2.80582e-08	6.61797e-06	833.97	885.847	477.822	294.286
Mllt3	2389.49	0.34726	0.368734	0.0626388	5.54385	2.95894e-08	6.87648e-06	2123.7	2048.7	2634.17	2751.39
Synpo2	538.509	0.595385	0.746888	0.107448	5.54116	3.00472e-08	6.88167e-06	423.891	380.885	653.159	696.1
Mfsd12	904.908	-0.642084	-0.862223	0.116531	-5.50996	3.58913e-08	8.10271e-06	1085.76	1248.46	739.29	546.127
Pax5	1482.15	0.40939	0.447223	0.0744182	5.5012	3.77215e-08	8.39596e-06	1297.17	1211.91	1711.34	1708.18
Smc2	10720.7	-0.213407	-0.218133	0.0389444	-5.47978	4.25867e-08	9.34718e-06	11612.9	11446.8	9917.36	9905.75
Myl7	9284.78	0.337533	0.358142	0.0622931	5.41847	6.01117e-08	1.30129e-05	8102.79	8174.61	9765.61	11096.1
Kdm6a	3280.26	-0.428604	-0.47471	0.0792057	-5.41128	6.2577e-08	1.33636e-05	3999.87	3631.88	2539.84	2949.46
Lbh	1609.31	0.473793	0.54005	0.0877259	5.40083	6.63319e-08	1.39766e-05	1426.78	1197.48	1889.75	1923.24
Cbln1	797.365	-0.582369	-0.733099	0.10802	-5.39128	6.99572e-08	1.45465e-05	993.328	997.419	669.565	529.149
Prdm6	694.19	-0.545504	-0.660033	0.10123	-5.38877	7.09407e-08	1.45594e-05	827.596	872.381	572.155	504.625
En2	415.134	0.63633	0.874439	0.118893	5.35211	8.69369e-08	1.76136e-05	322.964	263.542	549.597	524.433
Pkdcc	7492.24	-0.237385	-0.244337	0.0444726	-5.33779	9.40878e-08	1.88211e-05	8059.24	8190	6976.6	6743.11
Sdf2l1	1893.15	0.358458	0.384535	0.0672431	5.33077	9.77985e-08	1.93189e-05	1666.88	1617.8	2190.19	2097.73
Tnni1	3701.35	0.299659	0.314413	0.0565637	5.29774	1.17248e-07	2.28749e-05	3408.12	3192.32	4071.74	4133.21
Daam2	806.933	0.502755	0.590526	0.0951089	5.2861	1.24954e-07	2.3791e-05	645.929	642.504	918.73	1020.57
Lrrc59	12712.7	-0.200354	-0.204544	0.0378917	-5.28753	1.23979e-07	2.3791e-05	13655.9	13569.5	11718.9	11906.3
Tatdn2	2213.65	-0.370023	-0.399706	0.0701263	-5.27653	1.31654e-07	2.47683e-05	2474.29	2561.36	1999.47	1819.48
Cdh1	4789.11	-0.376244	-0.407774	0.0714393	-5.26663	1.38955e-07	2.58341e-05	5615.76	5306.42	4414.21	3820.06
Ctc1	3239.98	0.286773	0.299794	0.0545236	5.25961	1.44363e-07	2.65275e-05	2857.81	2950.9	3551.88	3599.35
Iqgap1	6111.32	-0.231596	-0.23826	0.0441067	-5.25082	1.51427e-07	2.75058e-05	6581.46	6648.18	5578	5637.65
Mme	1522.25	-0.416452	-0.46153	0.0793907	-5.24561	1.5577e-07	2.79731e-05	1859.17	1668.78	1285.81	1275.24
Dixdc1	881.707	0.503842	0.595002	0.0962896	5.23256	1.67174e-07	2.96837e-05	755.354	650.198	1059.21	1062.07
Furin	2759.48	-0.307438	-0.323934	0.0588034	-5.22823	1.71136e-07	3.00497e-05	3112.78	3024	2403.46	2497.66
Rdm1	496.018	0.606933	0.813159	0.116237	5.22153	1.77448e-07	3.08155e-05	378.208	341.45	689.047	575.367
Tmppe	1040.46	-0.457735	-0.522464	0.0881027	-5.19546	2.04211e-07	3.50777e-05	1171.81	1281.16	879.766	829.095
Lamp1	10914.4	-0.369128	-0.399815	0.0712037	-5.18412	2.17041e-07	3.68806e-05	12000.7	12831.8	10163.4	8661.63
Spry2	1821.46	0.445911	0.505148	0.0860539	5.18176	2.19797e-07	3.69517e-05	1433.15	1578.37	1985.11	2289.21
Gata4	2940.15	-0.296037	-0.311001	0.0572456	-5.17134	2.32423e-07	3.86629e-05	3301.89	3210.59	2578.8	2669.33
Fsd1l	633.032	0.512425	0.615328	0.0997496	5.13711	2.78992e-07	4.59261e-05	518.443	481.878	777.229	754.58
Hoxaas2	238.057	0.651232	0.994036	0.12691	5.13144	2.87538e-07	4.6845e-05	161.482	156.779	331.194	302.775
Srrm2	27857.9	0.280353	0.293187	0.0547283	5.12263	3.01298e-07	4.85859e-05	23615.7	26456.1	30635.9	30723.7
Degs1	4324.4	-0.402944	-0.445668	0.0787431	-5.1172	3.10107e-07	4.92577e-05	4841.28	5131.37	3989.71	3335.24
Polg	7139.04	-0.315122	-0.333877	0.0615927	-5.11623	3.11698e-07	4.92577e-05	7491.92	8429.49	6372.66	6262.07
Rasgrp3	1501.23	-0.375757	-0.409569	0.0736023	-5.10523	3.304e-07	5.16962e-05	1757.18	1668.78	1309.4	1269.58
Sfrp5	1668.35	-0.405794	-0.449901	0.079538	-5.10188	3.36293e-07	5.21023e-05	1809.24	2042.93	1401.68	1419.55
Ep400	7701.82	0.220598	0.226709	0.0433238	5.09185	3.54589e-07	5.44035e-05	6997.92	7197.39	8252.16	8359.8
Igfbp5	18402.6	0.311238	0.329514	0.0612236	5.08363	3.70291e-07	5.62665e-05	17356.1	15266.2	20029.5	20958.5
Pim1	1138.58	0.420233	0.470793	0.0827989	5.07534	3.86801e-07	5.82154e-05	966.768	942.595	1273.51	1371.45
Ets1	2747.34	0.323877	0.344806	0.0638684	5.07101	3.95717e-07	5.89955e-05	2429.67	2412.27	2948.96	3198.48
Atp6v1a	5839.77	-0.365824	-0.397411	0.0723488	-5.0564	4.27246e-07	6.31007e-05	6497.53	6778.99	5444.7	4637.84
Myl4	5648.5	0.289512	0.304187	0.0573193	5.05086	4.3983e-07	6.4335e-05	5079.25	5032.3	5955.34	6527.12
Pam	3415.96	0.346058	0.372369	0.0685377	5.04916	4.43746e-07	6.4335e-05	3160.59	2796.04	3792.84	3914.38
Pgk1	2590.66	0.383374	0.420713	0.076056	5.04069	4.63865e-07	6.66405e-05	2380.8	2051.59	2969.47	2960.78
Rplp1	19263.4	-0.214759	-0.22052	0.0426657	-5.03353	4.8154e-07	6.85566e-05	21323.1	20143.6	17871.1	17715.6
Trak2	1978.96	-0.412858	-0.461392	0.0820508	-5.03174	4.86052e-07	6.85811e-05	2227.82	2356.49	1790.29	1541.23
Plekhf2	1346.52	-0.381033	-0.41779	0.0757607	-5.02943	4.91941e-07	6.87977e-05	1504.33	1575.48	1166.87	1139.42
Rasa3	1694.81	0.373801	0.40838	0.0744505	5.02079	5.14584e-07	7.13331e-05	1502.21	1411.01	1998.44	1867.59
Mir17hg	3940.61	0.391419	0.432247	0.0782307	5.0034	5.63287e-07	7.74054e-05	3086.22	3622.26	4332.18	4721.78
Rab1b	5559.18	-0.246186	-0.255161	0.0492763	-4.99604	5.85192e-07	7.9041e-05	6005.65	6092.24	5193.49	4945.33
Scamp5	1265.05	-0.378137	-0.414519	0.0756773	-4.9967	5.83197e-07	7.9041e-05	1439.53	1451.4	1093.04	1076.22
Fam129b	3092.42	-0.339867	-0.365368	0.0681548	-4.9867	6.14201e-07	8.2256e-05	3310.38	3652.07	2786.95	2620.28
Prss8	1496.29	-0.531853	-0.663888	0.106725	-4.98338	6.2484e-07	8.29777e-05	1714.69	1953.48	1312.47	1004.53
Zfp503	2120.64	0.32876	0.351737	0.066095	4.97405	6.55677e-07	8.63472e-05	1849.61	1877.5	2304	2451.44
Tia1	4508.03	0.352519	0.381812	0.0711937	4.95156	7.36225e-07	9.61534e-05	3767.21	4062.78	4771.04	5431.09
Ltbr	1000.84	-0.437301	-0.499701	0.0883977	-4.94698	7.53756e-07	9.68423e-05	1151.62	1192.67	870.537	788.536
Pip4k2c	1698.55	-0.363109	-0.395559	0.0733941	-4.94738	7.52186e-07	9.68423e-05	1902.73	1956.37	1527.8	1407.29
Kdm5c	10045.2	-0.251643	-0.261565	0.0511015	-4.92438	8.46289e-07	0.000106991	10758.8	11148.6	8801.76	9471.86
Maf	970.574	-0.519949	-0.644572	0.105585	-4.92448	8.45868e-07	0.000106991	1104.88	1261.92	832.599	682.895
Fuca2	952.81	-0.488692	-0.585493	0.0993287	-4.91995	8.65663e-07	0.000108572	1066.63	1219.6	810.041	714.964
Mylk3	873.908	0.444268	0.511485	0.0903331	4.91811	8.73857e-07	0.000108737	751.105	690.595	1019.22	1034.72
Jag2	399.617	0.572793	0.770038	0.116631	4.91117	9.05338e-07	0.000111774	300.654	290.473	470.644	536.695
Obscn	388.667	0.615371	0.915277	0.125407	4.90699	9.24858e-07	0.000113299	229.475	308.748	490.126	526.319
Nr2f1	1303.45	0.477365	0.567394	0.0976943	4.88631	1.02743e-06	0.000124896	1052.82	1047.43	1718.52	1395.03
Fgf15	1453.88	0.420184	0.476177	0.0861377	4.87804	1.07143e-06	0.000129251	1308.86	1124.38	1670.32	1711.95
2210011C24Rik	189.263	-0.65017	-1.41518	0.133459	-4.87167	1.10658e-06	0.000132479	224.163	326.061	120.993	85.8335
Vps35	10578.6	-0.260759	-0.272149	0.0535624	-4.86833	1.12548e-06	0.000133729	11510.9	11634.3	10030.2	9138.91
Pim2	932.598	-0.589382	-0.830797	0.121371	-4.85603	1.19762e-06	0.000141239	1098.5	1289.82	551.648	790.422
Zfp521	2902.9	0.27736	0.29142	0.0573155	4.83918	1.30376e-06	0.000152617	2657.02	2565.2	3155.06	3234.32
Nfe2l2	1707.67	-0.37188	-0.409117	0.0769251	-4.83431	1.3361e-06	0.000155253	1953.72	1941.94	1550.36	1384.65
1810026B05Rik	965.372	0.560338	0.74864	0.116	4.83051	1.36181e-06	0.000157085	600.246	839.679	1181.22	1240.34
Strn3	3932.96	-0.243224	-0.252587	0.050536	-4.81289	1.48763e-06	0.000170356	4243.16	4309.01	3624.68	3555.01
Mybpc3	3765.45	0.378023	0.417915	0.0786002	4.80944	1.51351e-06	0.00017172	3096.85	3351.02	3961	4652.93
Ptgfrn	5980.83	-0.222148	-0.229202	0.0461997	-4.80842	1.52128e-06	0.00017172	6513.47	6396.18	5588.26	5425.43
Ddx21	20660.2	-0.17834	-0.181919	0.0371498	-4.80056	1.5822e-06	0.00017733	22089.1	21834.5	19060.6	19656.8
Efnb1	4111.09	-0.313428	-0.334869	0.0654787	-4.78672	1.69529e-06	0.000188667	4498.13	4672.58	3844.1	3429.57
Slc9a6	2074.8	-0.393738	-0.440426	0.0823345	-4.78218	1.73405e-06	0.00019163	2270.31	2506.53	1876.42	1645.93
Tenm3	6809.25	0.231087	0.239184	0.0483743	4.77707	1.77868e-06	0.000193852	6407.23	6086.47	7285.24	7458.08
mt-Nd6	16708.1	-0.31655	-0.33879	0.0662486	-4.77821	1.76859e-06	0.000193852	18498.2	18825	13604.6	15904.7
Col12a1	562.648	0.522181	0.663083	0.109355	4.77511	1.7961e-06	0.000194063	398.394	472.259	682.895	697.043
Pou3f2	390.011	0.598138	0.888343	0.125288	4.77409	1.80518e-06	0.000194063	307.029	240.458	547.547	465.01
Egln1	4565.51	0.364588	0.400608	0.0765128	4.76506	1.88799e-06	0.000201594	4181.54	3691.51	4866.4	5522.58
Bahcc1	6100.27	0.246428	0.256476	0.0518956	4.74854	2.04888e-06	0.000217305	5657.19	5463.2	6441.36	6839.32
Exoc6	927.943	-0.463022	-0.550305	0.0976729	-4.74054	2.13152e-06	0.000224562	1113.38	1091.68	817.218	689.497
Edem3	3435.03	-0.249156	-0.259606	0.0525745	-4.7391	2.14669e-06	0.000224663	3765.08	3721.33	3157.11	3096.61
Hmcn1	683.123	0.492798	0.605392	0.10402	4.73753	2.16335e-06	0.000224918	519.505	563.633	878.74	770.615
Anxa7	1776.41	-0.335431	-0.362992	0.0708489	-4.73445	2.19649e-06	0.000225429	1943.1	2053.51	1591.37	1517.65
Nme1	3373.51	0.275574	0.290028	0.0582064	4.73442	2.1968e-06	0.000225429	2975.73	3094.21	3814.37	3609.72
Gpi1	12535.5	0.2463	0.256481	0.0522257	4.71606	2.40452e-06	0.000245152	11666	11184.2	13100.1	14191.8
Fn1	40381.8	0.24787	0.258311	0.0526815	4.70507	2.53778e-06	0.000256684	36127.4	37425.8	41730.4	46243.5
Slit1	474.628	0.517888	0.661041	0.110093	4.70408	2.55011e-06	0.000256684	348.462	386.656	593.688	569.708
Vmp1	2464.19	-0.326124	-0.35167	0.0694192	-4.69789	2.62859e-06	0.000262909	2726.07	2798.93	2278.37	2053.4
9430015G10Rik	2737.36	0.407648	0.463504	0.0870805	4.68128	2.85096e-06	0.000283357	2066.33	2535.39	3082.26	3265.44
Alx4	387.618	0.539755	0.718596	0.115532	4.67189	2.98441e-06	0.000294766	300.654	285.664	461.416	502.739
Pfkl	27928.9	0.295201	0.313902	0.0633142	4.66247	3.1243e-06	0.000306667	26387.5	23419.6	29537.8	32370.5
Slc23a1	577.997	-0.607171	-1.00143	0.130567	-4.65026	3.31513e-06	0.000323389	704.36	836.793	473.72	297.116
Lonrf2	169.635	0.615467	1.08661	0.1324	4.64855	3.3428e-06	0.000324087	109.425	107.725	249.164	212.226
Smg5	6384.54	-0.220797	-0.228251	0.0475444	-4.64401	3.41717e-06	0.000329278	6792.88	6982.9	5997.38	5764.99
Dchs1	1692.49	0.317876	0.342071	0.0685696	4.63581	3.55542e-06	0.000338472	1519.21	1466.79	1880.53	1903.43
mt-Rnr2	5686.89	0.355184	0.39039	0.0766135	4.63605	3.55122e-06	0.000338472	5372.47	4473.48	6336.77	6564.84
Palm	1949.53	0.306408	0.327963	0.0662807	4.62288	3.78455e-06	0.000358128	1743.37	1714.95	2119.44	2220.35
Foxi2	272.314	0.568568	0.819738	0.123143	4.61713	3.8909e-06	0.000363834	199.728	194.29	342.473	352.766
Plppr3	990.114	0.39443	0.445852	0.0854264	4.61718	3.88981e-06	0.000363834	825.471	851.221	1109.45	1174.31
Aprt	5081.79	-0.284219	-0.301215	0.0617177	-4.60515	4.12174e-06	0.000383152	5564.76	5654.61	4803.85	4303.93
Fbxl20	1457.01	0.452896	0.540301	0.098467	4.59947	4.23564e-06	0.000391437	1312.04	1063.79	1636.49	1815.71
Cltc	29062.6	-0.276785	-0.292497	0.0603087	-4.58946	4.4439e-06	0.000405936	32240.1	31755.8	27913.6	24340.9
Parvb	2267.06	-0.291804	-0.310462	0.0635741	-4.58998	4.43296e-06	0.000405936	2444.54	2574.82	2043.56	2005.3
Eno3	2359.36	0.304762	0.326349	0.0664731	4.58474	4.54557e-06	0.000412641	2175.76	2012.15	2666.98	2582.55
Nes	3988.82	0.364435	0.404018	0.0795078	4.58364	4.56952e-06	0.000412641	3655.66	3212.52	4852.04	4235.08
Acta1	1473.29	0.44724	0.531374	0.0976138	4.58173	4.61144e-06	0.00041406	1339.66	1071.48	1690.83	1791.18
Nid2	9091.78	-0.187922	-0.192569	0.0410467	-4.57825	4.68879e-06	0.000418627	9795.17	9601	8435.7	8535.24
Cep68	2894.99	0.266543	0.280548	0.0582517	4.57572	4.74586e-06	0.000418988	2643.21	2586.37	3103.79	3246.58
Larp4	4318.11	-0.230318	-0.239105	0.0503266	-4.57647	4.72879e-06	0.000418988	4747.79	4603.33	3922.03	3999.27
Foxl2os	278.521	0.599017	1.00215	0.131029	4.57164	4.83933e-06	0.000424866	156.17	214.488	343.498	399.927
Lrp8	581.449	0.458328	0.553174	0.100763	4.54858	5.40102e-06	0.00047156	466.386	476.107	701.352	681.952
Gcat	1947.19	-0.410613	-0.472728	0.0903508	-4.54465	5.50262e-06	0.000477791	2166.2	2359.37	1785.17	1478.03
Pard6b	2211.31	-0.308544	-0.331516	0.0679203	-4.54274	5.55264e-06	0.0004795	2507.22	2420.93	2035.36	1881.73
Ptn	13481	0.307742	0.330531	0.0677707	4.54093	5.60078e-06	0.000481028	12843.1	11045.7	14598.2	15436.8
Spice1	1306.6	0.385738	0.43534	0.0849851	4.5389	5.65494e-06	0.000483054	1053.88	1167.66	1444.74	1560.09
Cgnl1	7026.36	-0.241323	-0.251717	0.0532207	-4.53439	5.77707e-06	0.000488209	7397.37	7876.44	6581.84	6249.81
Epb41l3	3010.8	-0.365879	-0.40709	0.0806792	-4.53498	5.76088e-06	0.000488209	3246.64	3617.45	2776.7	2402.39
Asb2	711.265	0.48298	0.602437	0.1066	4.53075	5.87747e-06	0.000494052	569.437	560.748	778.254	936.622
Hspa9	22984.7	-0.170081	-0.173574	0.0375625	-4.52795	5.95592e-06	0.000497997	24049.2	24680.6	21899.8	21309.3
Phf13	2378.45	-0.268086	-0.282736	0.0592899	-4.52161	6.13711e-06	0.000510446	2598.59	2622.91	2138.92	2153.38
Uhrf2	6859.89	0.205713	0.212044	0.045527	4.51848	6.22851e-06	0.000515336	6390.23	6324.04	7224.74	7500.52
Myc	2165.35	0.301297	0.322904	0.0668319	4.50828	6.53559e-06	0.000537926	1989.84	1859.22	2366.55	2445.78
Slc2a1	50225.6	-0.197589	-0.203207	0.0438591	-4.50508	6.63485e-06	0.000543267	55103.7	52410.2	48000.6	45388
AI662270	134.807	-0.594196	-1.39336	0.132617	-4.48053	7.44571e-06	0.000603408	200.79	189.481	93.3085	55.6503
Cd2ap	4106.76	-0.219821	-0.227757	0.0490525	-4.48135	7.41723e-06	0.000603408	4422.7	4437.89	3766.18	3800.25
Frmd6	1649.45	-0.310955	-0.335326	0.0694389	-4.47811	7.5307e-06	0.000607182	1810.3	1869.8	1475.5	1442.19
Selt	6275.83	-0.206014	-0.21251	0.0460443	-4.47426	7.66757e-06	0.000615079	6677.08	6796.3	5910.22	5719.72
Atp5a1	33701	-0.164023	-0.167228	0.0366765	-4.47215	7.74383e-06	0.000618059	35703.5	35599.3	32395.5	31105.7
Fem1b	14137.8	-0.196362	-0.20197	0.0439481	-4.46804	7.89396e-06	0.000623741	15373.7	14877.6	13456.9	12842.9
Neu1	1477.14	-0.488024	-0.618978	0.109212	-4.46859	7.87366e-06	0.000623741	1569.14	2008.3	1276.58	1054.53
Snhg17	2071.29	0.438374	0.522387	0.0982576	4.46147	8.13976e-06	0.000639963	1478.84	1920.78	2397.31	2488.23
Lsm14b	4971.61	0.220846	0.229005	0.0495801	4.45433	8.4157e-06	0.000658383	4667.05	4489.83	5303.2	5426.37
Kdm5b	10469.2	0.26628	0.28112	0.059816	4.45165	8.52125e-06	0.000663356	9495.58	9410.56	10801.2	12169.5
Ly75	3134.26	-0.305812	-0.329281	0.0688159	-4.44391	8.83402e-06	0.000684333	3440	3539.54	2943.83	2613.68
Klf8	436.418	-0.525399	-0.717437	0.118345	-4.43954	9.01509e-06	0.000694954	491.883	593.45	318.889	341.447
Hadh	5053.57	-0.305018	-0.328379	0.0687561	-4.43623	9.15493e-06	0.000702308	5721.99	5529.57	4794.62	4168.11
Rbm5	5639.22	0.310244	0.335011	0.0699926	4.43252	9.31387e-06	0.000711048	4604.37	5368.94	6263.97	6319.61
Pax6	1870.95	0.36126	0.403053	0.0815283	4.4311	9.37557e-06	0.000712259	1731.68	1491.8	2163.53	2096.79
Wnt8a	283.991	-0.592509	-1.19215	0.133747	-4.43008	9.41987e-06	0.000712259	332.526	457.832	134.323	211.282
Egr2	586.68	0.458247	0.561552	0.103575	4.42428	9.67664e-06	0.000719204	481.259	466.488	732.113	666.86
Hap1	310.476	0.578293	0.956404	0.130637	4.42672	9.56784e-06	0.000719204	250.722	172.168	403.995	415.019
Me2	5615.44	-0.200563	-0.206679	0.0453257	-4.42493	9.64723e-06	0.000719204	6039.65	5994.13	5259.11	5168.87
Pdia4	14528.7	0.177611	0.181804	0.0401482	4.42389	9.69376e-06	0.000719204	13665.4	13562.8	15736.3	15150.1
B4galnt2	341.445	-0.590219	-1.13681	0.133603	-4.41769	9.97593e-06	0.000736681	463.199	475.145	272.748	154.689
Igf1r	4927.11	0.21521	0.222876	0.0487466	4.41488	1.01066e-05	0.000741427	4628.8	4466.75	5271.42	5341.48
Tlx1	144.436	0.586939	1.06813	0.132963	4.41429	1.0134e-05	0.000741427	90.3025	96.1832	197.896	193.361
Synpo2l	875.719	0.469225	0.584796	0.106475	4.40692	1.04852e-05	0.000763581	716.046	685.786	936.161	1164.88
Pbdc1	3135.75	-0.244056	-0.255546	0.0554311	-4.40286	1.06832e-05	0.000770899	3413.44	3412.58	2803.36	2913.62
Tagln	2925.55	-0.366288	-0.410868	0.0831808	-4.40352	1.06509e-05	0.000770899	3370.94	3306.78	2754.14	2270.34
Ahctf1	11018.9	-0.195466	-0.201186	0.0444596	-4.39648	1.10021e-05	0.000784789	11994.3	11577.6	10453.6	10050.1
Cyp26c1	2255.47	0.317448	0.344718	0.0721974	4.39695	1.09784e-05	0.000784789	1969.66	2005.42	2385.01	2661.78
Spry1	1241.46	0.336881	0.370301	0.076633	4.39603	1.10247e-05	0.000784789	1099.57	1066.67	1402.7	1396.92
Arcn1	10141.2	-0.190335	-0.195606	0.0433138	-4.39433	1.11116e-05	0.000787428	10861.8	10792.7	9663.07	9247.38
Dhx32	1919.19	-0.368002	-0.414029	0.0840687	-4.3774	1.20104e-05	0.000847321	2168.32	2216.06	1784.14	1508.22
Pla2g12b	418.642	-0.584474	-1.12456	0.1336	-4.3748	1.21543e-05	0.000853661	538.628	608.839	339.397	187.702
Chd7	9381.4	0.203947	0.210569	0.0466854	4.36854	1.25079e-05	0.000870759	8819.9	8577.61	9803.54	10324.5
Dclk2	568.315	0.461855	0.572966	0.105707	4.36919	1.24709e-05	0.000870759	436.639	477.068	652.134	707.419
Sema3e	833.573	-0.406227	-0.472806	0.0930131	-4.36742	1.25722e-05	0.0008714	947.645	989.725	730.062	666.86
Kmt2e	2608.68	0.277458	0.295228	0.0636168	4.36139	1.29238e-05	0.000891853	2403.11	2283.39	2793.1	2955.12
Fmo4	140.501	-0.577686	-1.36276	0.132506	-4.35971	1.30237e-05	0.000894508	176.356	227.954	96.3846	61.3096
Slc22a23	2767.76	-0.330932	-0.363035	0.0759364	-4.35802	1.31246e-05	0.000894508	3113.84	3113.45	2605.46	2238.27
Uqcrq	1998.2	-0.276063	-0.293574	0.0633479	-4.35789	1.31321e-05	0.000894508	2186.38	2215.1	1795.42	1795.9
Cpn1	743.461	-0.472631	-0.596712	0.1085	-4.35605	1.3243e-05	0.000898193	867.967	921.435	656.236	528.206
Mthfd1	7176.01	-0.184133	-0.188979	0.0422861	-4.35444	1.33405e-05	0.000900937	7604.54	7686	6686.43	6727.08
Gli3	6625.8	0.209671	0.216971	0.048233	4.34706	1.37976e-05	0.000927845	6131.01	6126.87	6932.51	7312.82
C2cd3	3564.78	0.234602	0.245029	0.0539915	4.34517	1.39166e-05	0.000928472	3274.26	3251.95	3783.61	3949.28
Igf2os	2187.86	-0.375555	-0.426047	0.0864435	-4.34451	1.39587e-05	0.000928472	2439.23	2576.75	2040.48	1694.97
Sec24a	1770.76	-0.300281	-0.323566	0.0691234	-4.34412	1.39832e-05	0.000928472	1926.1	2010.23	1602.65	1544.06
Gjc1	2881.23	0.289008	0.309533	0.0665533	4.3425	1.4087e-05	0.00093145	2665.52	2482.49	3069.95	3306.95
Notch1	1578.65	0.300646	0.324093	0.0692916	4.33885	1.43232e-05	0.000943121	1395.97	1408.12	1752.35	1758.17
Pax3	1267.17	0.369764	0.417701	0.0852428	4.33777	1.43936e-05	0.000943827	1128.25	1042.63	1380.15	1517.65
Galnt10	2978.92	-0.258899	-0.273275	0.0597143	-4.33562	1.45347e-05	0.00094914	3364.57	3156.73	2685.44	2708.94
Pdpn	995.991	-0.488437	-0.635789	0.112814	-4.32956	1.49406e-05	0.000971633	1150.56	1272.5	893.096	667.803
Mfsd1	4929.06	-0.348956	-0.38825	0.08067	-4.32573	1.52029e-05	0.000984636	5443.65	5731.55	4687.98	3853.07
Acsl4	2906.67	-0.239604	-0.250996	0.0556768	-4.30349	1.68129e-05	0.00108075	3190.34	3127.88	2637.25	2671.21
Lmbrd2	1028.27	-0.365333	-0.412195	0.084895	-4.30335	1.68237e-05	0.00108075	1210.05	1138.81	864.385	899.836
Alg13	2664.2	-0.245759	-0.258127	0.0571314	-4.30164	1.69542e-05	0.00108472	2921.55	2882.61	2410.64	2442.01
E430025E21Rik	4447.56	-0.227009	-0.236614	0.0527864	-4.30053	1.70392e-05	0.00108577	4805.16	4816.85	4201.96	3966.26
Oit3	251.271	-0.566758	-0.979353	0.131955	-4.29509	1.74622e-05	0.00110825	334.651	331.832	199.947	138.654
Dact1	1177.06	0.37125	0.421433	0.0866277	4.28559	1.82257e-05	0.00115208	958.269	1054.17	1296.07	1399.75
Dsg2	2156.1	-0.379745	-0.434369	0.0886784	-4.28227	1.84996e-05	0.00116474	2397.8	2557.51	2012.8	1656.3
Nppb	63.2493	0.545086	1.63893	0.127352	4.28016	1.86758e-05	0.00117116	28.6843	32.7023	107.664	83.947
2510009E07Rik	1128.25	0.372407	0.423466	0.0870796	4.27663	1.89744e-05	0.00118426	1016.7	911.816	1260.18	1324.29
Atp1a1	24490.5	-0.158412	-0.161573	0.0370474	-4.27593	1.90344e-05	0.00118426	25875.4	25844.4	23543.5	22698.7
Dsc2	1242.43	-0.387098	-0.446051	0.0905698	-4.27403	1.9197e-05	0.00118969	1400.22	1464.87	1134.06	970.578
Slc16a1	22477.4	-0.446393	-0.549734	0.104495	-4.2719	1.93813e-05	0.00119642	26817.7	26599.5	19876.8	16615.8
Kif5b	9827.3	-0.183551	-0.188553	0.0429845	-4.27016	1.95332e-05	0.0012011	10682.3	10256	9168.84	9202.1
Acadm	1481.8	-0.328263	-0.361108	0.076915	-4.26787	1.97347e-05	0.00120879	1601.01	1731.3	1272.48	1322.4
Ttc39a	225.187	-0.55464	-0.904341	0.130117	-4.26261	2.02051e-05	0.00123282	307.029	279.893	173.287	140.54
Npc1	2971.93	-0.235355	-0.246349	0.055233	-4.26113	2.03395e-05	0.00123301	3189.27	3260.61	2710.05	2727.81
Rab5c	4298.57	-0.272455	-0.290109	0.0639437	-4.26086	2.03643e-05	0.00123301	4659.61	4797.62	4083.02	3654.05
Tuba4a	503.694	-0.563817	-0.991666	0.132394	-4.25863	2.05685e-05	0.00124063	590.685	749.267	417.325	257.5
Mapk11	940.085	0.393179	0.456408	0.0923717	4.25648	2.07667e-05	0.00124782	839.282	746.381	1113.55	1061.13
Spns2	885.432	-0.521362	-0.745352	0.122565	-4.25377	2.10205e-05	0.00125829	971.018	1246.53	763.899	560.276
Tbx1	853.574	0.421555	0.50452	0.0991295	4.25257	2.11332e-05	0.00126025	677.8	733.878	932.06	1070.56
Clcn5	6824.67	-0.26584	-0.282232	0.0625618	-4.24924	2.14496e-05	0.00127432	7566.29	7412.84	6535.7	5783.85
Gpx1	5185.39	-0.279044	-0.298307	0.0657428	-4.24448	2.191e-05	0.00129679	5409.65	6027.8	4817.18	4486.92
Six1	1323.68	0.320042	0.350611	0.0754485	4.24186	2.21676e-05	0.00130714	1187.74	1139.77	1492.94	1474.26
Psph	1473.67	-0.467562	-0.597473	0.110298	-4.23907	2.24444e-05	0.00131855	1747.62	1800.55	1362.71	983.783
Ptpru	800.758	0.407825	0.481559	0.0962844	4.23563	2.2791e-05	0.00133395	705.422	631.923	906.425	959.26
Trp53bp1	7382.87	0.196792	0.20312	0.046473	4.23454	2.29015e-05	0.00133547	6833.25	6895.37	7712.82	8090.04
Plxna2	4481.21	-0.251768	-0.265625	0.0594769	-4.23304	2.30554e-05	0.0013395	4956.02	4828.39	4255.28	3885.14
Jade3	2756.59	-0.289084	-0.310912	0.0683354	-4.23037	2.33311e-05	0.00135055	3061.79	3042.27	2597.26	2325.05
Cpm	1867.49	-0.303093	-0.328759	0.0717525	-4.22415	2.39847e-05	0.00138332	2167.26	1991.95	1672.38	1638.38
Cacna1h	203.942	0.544139	0.862496	0.128921	4.22071	2.4353e-05	0.00139704	141.297	148.122	259.418	266.933
Kpna6	4937.41	-0.204156	-0.211312	0.0483842	-4.21947	2.44877e-05	0.00139704	5216.3	5379.52	4613.13	4540.68
Nrip1	2066.73	0.315027	0.344363	0.0746596	4.21952	2.44827e-05	0.00139704	1916.54	1726.49	2380.9	2242.99
Cdc34	4591.73	-0.226329	-0.236262	0.0536817	-4.21613	2.48535e-05	0.0014128	4883.77	5048.65	4335.26	4099.26
AC151602.15	144.073	-0.560992	-1.03498	0.133177	-4.2124	2.52677e-05	0.0014312	188.042	199.099	100.486	88.6631
Hirip3	4331.98	0.309566	0.337356	0.0735424	4.20935	2.56104e-05	0.00144543	3909.57	3747.3	4464.45	5206.6
Cntfr	1634.11	0.314172	0.343443	0.0746746	4.20722	2.5853e-05	0.00145393	1504.33	1377.34	1845.66	1809.11
Dcun1d4	2180.67	-0.279723	-0.299557	0.066505	-4.20605	2.59876e-05	0.00145632	2406.3	2405.54	2028.18	1882.68
Rnf165	1832.38	0.317868	0.348386	0.0756099	4.20406	2.62174e-05	0.00146401	1701.94	1523.54	2026.13	2077.92
Gm17275	191.24	0.560737	1.05653	0.133427	4.20258	2.63893e-05	0.00146842	113.675	134.656	220.454	296.173
Cd164	9728.22	-0.16572	-0.169493	0.0394665	-4.199	2.68102e-05	0.0014866	10328.5	10269.5	9199.6	9115.32
Hsph1	17262.1	0.19582	0.202183	0.0467015	4.19302	2.75266e-05	0.00152099	15568.2	16538.7	18852.4	18089.2
Cpt1c	601.537	0.447396	0.558716	0.106801	4.18906	2.80106e-05	0.00154234	448.326	524.198	705.453	728.17
Myl3	1468.29	0.348436	0.3909	0.0832193	4.18696	2.82721e-05	0.00155096	1352.41	1189.79	1630.34	1700.63
Sparcl1	1019.45	0.398102	0.467568	0.0950982	4.18622	2.83634e-05	0.00155096	910.462	801.206	1242.75	1123.38
Slc35f6	1235.53	-0.432723	-0.530067	0.103535	-4.17948	2.92173e-05	0.00159214	1442.72	1476.41	1139.18	883.802
Snx8	2139.66	-0.326692	-0.360855	0.0783047	-4.17206	3.01855e-05	0.00163925	2310.68	2499.8	1987.16	1761
P3h3	408.732	0.488909	0.661174	0.117327	4.16705	3.08564e-05	0.00166994	298.53	334.717	470.644	531.036
Fzd4	2711.65	-0.277037	-0.29672	0.0665622	-4.16208	3.15362e-05	0.00169702	3080.91	2898	2527.53	2340.14
Sccpdh	2232.4	-0.296444	-0.321126	0.0712427	-4.16105	3.16789e-05	0.00169702	2485.98	2472.87	2092.78	1877.96
Sh3bgr	1468.91	0.362241	0.411842	0.0870467	4.16146	3.1622e-05	0.00169702	1315.23	1207.1	1567.79	1785.52
Slc25a4	13799.7	-0.27105	-0.289396	0.0651785	-4.15859	3.20224e-05	0.00170963	14992.3	15364.3	13333.9	11508.3
1700019D03Rik	231.76	-0.542599	-0.89483	0.130565	-4.15578	3.24185e-05	0.00171916	271.97	330.87	149.704	174.497
Trim6	1332.95	-0.346073	-0.388288	0.0832608	-4.15649	3.23174e-05	0.00171916	1428.9	1592.79	1179.17	1130.93
Ckb	1000.48	0.345722	0.387999	0.0833351	4.14857	3.34553e-05	0.00176821	856.281	877.19	1118.68	1149.79
Pcdh8	219.002	0.548714	0.980745	0.132686	4.13543	3.54286e-05	0.00186626	167.856	126.962	319.915	261.273
Stox2	4573.12	0.249265	0.263431	0.0603369	4.13121	3.60856e-05	0.00189456	4340.9	3974.29	4872.55	5104.73
Llgl2	2198.02	-0.306875	-0.335113	0.0742977	-4.13033	3.62235e-05	0.0018955	2406.3	2496.91	2059.96	1828.91
Atp7b	1261.57	-0.368004	-0.421705	0.0891551	-4.12768	3.66435e-05	0.00190548	1371.54	1516.81	1140.21	1017.74
Prdm1	1061.68	0.348152	0.39206	0.0843471	4.12761	3.66554e-05	0.00190548	886.027	950.29	1183.27	1227.14
Vps26a	3363.41	-0.269488	-0.287856	0.0653747	-4.12221	3.75251e-05	0.00194429	3615.29	3779.04	3179.67	2879.67
Numa1	11097.4	0.165107	0.168994	0.0401007	4.11731	3.83326e-05	0.00197933	10595.1	10302.2	11756.9	11735.6
Tuba1c	1388.82	-0.318621	-0.351003	0.0773993	-4.11659	3.84519e-05	0.00197933	1521.33	1591.83	1261.2	1180.92
Tmed5	2052.14	-0.264989	-0.282458	0.0644273	-4.113	3.90549e-05	0.00200385	2297.93	2207.4	1838.48	1864.76
Zfp57	1104.06	0.39308	0.462683	0.0956166	4.111	3.93946e-05	0.00201473	856.281	1000.3	1221.21	1338.44
Cd59a	368.56	-0.475056	-0.632688	0.115614	-4.10897	3.97429e-05	0.00201864	446.201	450.137	278.9	299.002
Rnf128	1012.7	-0.415717	-0.502718	0.101163	-4.10937	3.96733e-05	0.00201864	1108.07	1265.77	905.4	771.558
Sacm1l	2483.3	-0.257788	-0.273791	0.0627479	-4.10832	3.98543e-05	0.00201864	2675.08	2760.46	2312.21	2185.45
Reep5	2167.11	-0.348566	-0.393266	0.0848893	-4.10612	4.02366e-05	0.0020315	2444.54	2475.75	2045.61	1702.52
Eaf1	4902.39	-0.192353	-0.19865	0.0468625	-4.10464	4.0495e-05	0.00203335	5208.86	5269.88	4538.28	4592.56
Psmd1	11516.9	-0.170918	-0.175275	0.0416424	-4.10443	4.05305e-05	0.00203335	12386.3	12045	10968.4	10667.9
Atp5g3	11411.2	-0.208339	-0.216442	0.0507771	-4.10301	4.07806e-05	0.00203942	12278	12251.8	10995	10119.9
Efnb3	1647.96	0.29862	0.324818	0.072827	4.1004	4.12444e-05	0.00205611	1501.15	1425.43	1882.58	1782.69
Sardh	110.157	-0.531081	-1.43526	0.129826	-4.09073	4.30026e-05	0.00213701	143.422	177.939	75.8772	43.3883
Tril	555.361	0.474463	0.63443	0.116067	4.08785	4.35397e-05	0.00215692	480.197	390.504	718.783	631.961
Zfp568	8542.77	-0.192132	-0.198468	0.0470241	-4.08581	4.39231e-05	0.00216912	9360.65	8899.83	7845.09	8065.52
Atp5b	55395.6	-0.14223	-0.144735	0.0348818	-4.07749	4.55253e-05	0.00224124	57312.4	59029.5	53303.8	51936.8
Cyba	1063.01	-0.418356	-0.510438	0.102818	-4.06891	4.72331e-05	0.00231809	1256.8	1240.76	978.201	776.274
Ube2b	3014.71	0.23279	0.244577	0.0572907	4.06332	4.83792e-05	0.00236699	2692.08	2826.82	3256.57	3283.37
Serinc5	1678.29	-0.299864	-0.32703	0.0738252	-4.06181	4.86931e-05	0.00237499	1803.93	1931.36	1449.87	1528.02
Erbb3	1160.81	0.3293	0.366922	0.0811357	4.05863	4.93615e-05	0.00239282	1001.83	1026.27	1266.33	1348.81
Samd8	1623.18	-0.291783	-0.3166	0.0718886	-4.05881	4.93224e-05	0.00239282	1855.98	1745.72	1436.54	1454.45
Eif2ak2	621.677	-0.424837	-0.524377	0.104847	-4.05199	5.07835e-05	0.00244674	773.415	693.481	532.166	487.647
Pqlc2	645.22	-0.501326	-0.727252	0.123705	-4.05258	5.06562e-05	0.00244674	711.796	896.427	555.749	416.905
Dlg4	1283.59	0.34105	0.383959	0.0842691	4.04716	5.18434e-05	0.00247517	1112.31	1115.72	1368.87	1537.46
Glrx5	2809.51	-0.253517	-0.269188	0.0626353	-4.04751	5.17649e-05	0.00247517	2952.36	3188.47	2555.22	2541.99
Rcor2	6768.17	0.264698	0.282744	0.0653858	4.04826	5.16008e-05	0.00247517	6149.07	6066.27	6930.46	7926.86
Col26a1	1728.6	0.284803	0.307848	0.0703834	4.04645	5.20006e-05	0.0024752	1594.64	1495.65	1922.57	1901.54
Lama1	4295.06	0.238888	0.251841	0.0590839	4.04321	5.27253e-05	0.00250215	3768.27	4072.39	4777.19	4562.38
Klc4	1050.19	-0.463911	-0.613446	0.114797	-4.04113	5.31944e-05	0.0025162	1190.93	1348.49	957.694	703.646
Tnnt2	8346.36	0.237743	0.250515	0.0588402	4.04049	5.33396e-05	0.0025162	7550.35	7697.54	8575.15	9562.41
1810013L24Rik	1630.49	-0.287807	-0.311772	0.071251	-4.03934	5.36015e-05	0.00252103	1764.62	1846.72	1481.66	1428.99
Sec61a1	12000.8	-0.15986	-0.163533	0.0396337	-4.03345	5.49648e-05	0.00257747	12578.6	12780.8	11455.4	11188.5
Erbb2	3136.34	0.222326	0.23267	0.0551313	4.03266	5.51485e-05	0.00257844	2911.99	2856.64	3339.62	3437.11
Plpp2	727.235	-0.403044	-0.484426	0.0999658	-4.03182	5.53459e-05	0.00258003	845.657	850.259	648.033	564.992
Slc7a9	284.515	-0.539095	-1.10357	0.133733	-4.03113	5.55105e-05	0.00258009	365.46	410.702	231.733	130.165
Psmb6	8202.91	-0.164479	-0.168497	0.0408102	-4.03035	5.56947e-05	0.00258107	8689.23	8673.8	7694.36	7754.25
Ak4	5966.01	0.261061	0.278511	0.0648232	4.02727	5.64284e-05	0.00260742	5637	5148.68	6235.26	6843.1
Nup62cl	929.136	-0.367403	-0.424554	0.0912796	-4.02503	5.69692e-05	0.00262473	1022.01	1107.07	824.396	763.069
Bcor	2896.39	0.223616	0.234223	0.055618	4.02057	5.80583e-05	0.00265941	2646.4	2676.78	3159.16	3103.21
Ticrr	2665.79	0.240104	0.253438	0.0597187	4.02058	5.80559e-05	0.00265941	2462.6	2402.66	2836.17	2961.73
Slc9a3r1	6601.64	-0.460727	-0.608435	0.11466	-4.0182	5.86456e-05	0.00267854	7622.6	8323.69	5732.83	4727.44
Phgdh	1839.93	-0.310741	-0.342378	0.0774534	-4.01197	6.02152e-05	0.00274231	2051.46	2062.17	1724.67	1521.42
Mtdh	6444.79	-0.195993	-0.203011	0.0488683	-4.01064	6.05532e-05	0.00274978	6958.61	6837.66	5830.24	6152.66
Cep76	1422.22	-0.290336	-0.315463	0.0724182	-4.00915	6.09373e-05	0.00275929	1591.45	1562.98	1260.18	1274.3
Fgfr3	1713.69	-0.382345	-0.449607	0.0953968	-4.00794	6.12505e-05	0.00276555	1798.61	2157.39	1545.23	1353.53
Usp24	5162.74	-0.184007	-0.189782	0.0459445	-4.00498	6.20234e-05	0.00279247	5533.95	5469.94	4824.36	4822.71
Nppa	26.7581	0.435644	2.3825	0.10881	4.00371	6.23573e-05	0.00279952	9.56144	7.69465	49.2177	40.5587
Cmtm4	5444.73	-0.236042	-0.248805	0.0590041	-4.00044	6.32258e-05	0.00283048	6100.2	5725.78	5168.88	4784.04
Card14	125.028	-0.528266	-1.26637	0.132204	-3.99585	6.44631e-05	0.0028754	142.359	210.641	82.0294	65.0825
Gatsl2	1997.42	-0.271585	-0.291841	0.0679749	-3.99537	6.45932e-05	0.0028754	2221.44	2175.66	1857.97	1734.59
Xrcc1	3753.68	0.210972	0.219934	0.0528877	3.98905	6.63374e-05	0.00294475	3442.12	3494.33	3962.02	4116.23
Mir124-2hg	496.859	0.429538	0.539661	0.107738	3.98689	6.69449e-05	0.00296339	421.766	388.58	576.257	600.834
Cox8a	3668.03	-0.215011	-0.224551	0.0539512	-3.98528	6.7401e-05	0.00296696	4020.06	3886.76	3326.29	3439
Tspan2	1590.46	-0.289625	-0.314894	0.0726623	-3.9859	6.72237e-05	0.00296696	1820.92	1706.29	1416.03	1418.61
C2cd2l	760.169	-0.45285	-0.593347	0.113666	-3.98406	6.77486e-05	0.00297398	816.972	1010.89	657.261	555.559
Chst15	942.53	-0.358121	-0.411858	0.0900783	-3.97566	7.01835e-05	0.00307232	1047.51	1104.18	845.929	772.501
Actb	72796.5	-0.117987	-0.11948	0.0297149	-3.97063	7.1682e-05	0.00312925	76401.3	75218.1	69660.4	69906.2
Nav1	4086.7	0.216049	0.225823	0.0544303	3.96928	7.20901e-05	0.00313728	3834.14	3702.09	4296.29	4514.27
Slc13a3	251.216	-0.530322	-1.11861	0.133626	-3.96871	7.22629e-05	0.00313728	354.836	332.794	204.048	113.187
Efs	2509.46	0.265383	0.284484	0.0669461	3.96413	7.36627e-05	0.00318929	2208.69	2317.05	2647.5	2864.57
Ipo7	18596.9	-0.160493	-0.164351	0.0404979	-3.96299	7.40157e-05	0.00319582	20098.2	19213.5	17415.9	17660
Mllt6	1507.53	0.369966	0.431279	0.093409	3.96071	7.47284e-05	0.0032178	1155.87	1411.01	1691.86	1771.38
Acsl1	910.049	-0.392697	-0.47029	0.099257	-3.95637	7.6098e-05	0.00326787	1008.2	1105.14	821.32	705.532
Vldlr	1456.95	0.423076	0.529377	0.107137	3.94894	7.84991e-05	0.00336185	1161.18	1224.41	1476.53	1965.68
Cldn7	1094.74	-0.402429	-0.489132	0.102117	-3.94087	8.11881e-05	0.00343972	1289.73	1266.73	1015.11	807.4
Fam179b	2919.5	-0.22615	-0.237641	0.0573794	-3.9413	8.10414e-05	0.00343972	3138.28	3179.82	2737.73	2622.16
Itgb1bp2	98.4583	0.520799	1.25372	0.132153	3.94089	8.11815e-05	0.00343972	47.8072	68.29	146.628	131.108
Zc3hav1	362.785	-0.525828	-0.988067	0.133419	-3.94117	8.10852e-05	0.00343972	411.142	553.053	297.357	189.588
Pcyox1	4152.84	-0.260301	-0.278493	0.0660902	-3.93857	8.1968e-05	0.00346348	4562.93	4540.81	3985.61	3522
Pax8	384.919	0.459813	0.619581	0.11694	3.93205	8.42241e-05	0.00354932	282.594	324.137	460.39	472.556
Abcc1	1861.01	0.33575	0.379536	0.0854437	3.92948	8.51294e-05	0.00357792	1706.19	1530.27	1964.61	2242.99
Senp5	1963.56	-0.26488	-0.284298	0.0674715	-3.92581	8.64401e-05	0.00362338	2181.07	2131.42	1824.13	1717.61
Irf6	548.822	-0.513429	-0.851936	0.130808	-3.92507	8.67061e-05	0.00362491	702.235	709.832	487.05	296.173
Cyc1	5853.64	-0.182938	-0.188869	0.0466497	-3.92153	8.79867e-05	0.00364498	6172.44	6299.04	5554.42	5388.64
Plaa	6515.66	-0.175915	-0.181159	0.04485	-3.92229	8.7711e-05	0.00364498	7021.29	6828.04	6069.15	6144.17
Srpk2	2001.12	0.348808	0.399371	0.0889358	3.92202	8.78089e-05	0.00364498	1861.29	1591.83	2134.82	2416.54
mt-Tc	221.422	0.520491	1.20256	0.132738	3.9212	8.81087e-05	0.00364498	166.794	101.954	248.139	368.801
Glrx	828.745	-0.468294	-0.647067	0.119547	-3.91725	8.95632e-05	0.00367326	981.642	1040.7	758.772	533.865
Kit	1957.26	0.28616	0.311449	0.0730585	3.91686	8.97097e-05	0.00367326	1780.55	1713.98	2065.09	2269.4
Kmo	126.176	-0.514062	-1.30085	0.131203	-3.91808	8.92581e-05	0.00367326	161.482	197.175	92.2831	53.7638
Nptn	2963.81	-0.231206	-0.243719	0.0590316	-3.91665	8.97878e-05	0.00367326	3172.27	3253.88	2789	2640.09
Sec24d	1438.33	-0.347931	-0.398236	0.088844	-3.9162	8.99546e-05	0.00367326	1638.19	1632.23	1346.31	1136.59
Bbs12	484.989	0.42323	0.533114	0.10814	3.91372	9.08856e-05	0.0036922	412.205	380.885	563.952	582.913
Lefty2	261.442	-0.379784	-2.96293	0.0970256	-3.91426	9.06812e-05	0.0036922	404.768	522.275	33.8371	84.8902
Bmp4	1012.5	-0.328036	-0.368885	0.0839237	-3.90875	9.27763e-05	0.00373216	1146.31	1135.92	908.476	859.278
Mmd	1900.65	0.28998	0.316578	0.0741925	3.90848	9.28776e-05	0.00373216	1777.37	1609.14	2153.27	2062.83
Rai1	4007.05	0.273597	0.295449	0.0700088	3.90803	9.30501e-05	0.00373216	3498.43	3698.24	4134.28	4697.26
Tmem94	2472.13	0.232908	0.245774	0.0595749	3.90949	9.24908e-05	0.00373216	2299	2225.68	2669.03	2694.79
Zfp318	2782.11	0.21913	0.229699	0.0560405	3.9102	9.22185e-05	0.00373216	2577.34	2545.01	3009.46	2996.63
Zfp655	1779.77	-0.277038	-0.29985	0.0709111	-3.90683	9.35138e-05	0.00374126	1965.41	1962.14	1655.97	1535.57
Gm42664	200.961	0.516492	0.909822	0.13242	3.90041	9.60299e-05	0.00383222	123.236	155.817	239.936	284.854
Rdx	21786.6	-0.13183	-0.134006	0.033812	-3.8989	9.66294e-05	0.00384643	22797.7	22797.3	20867.3	20684
Prodh2	80.021	-0.490642	-1.53271	0.125957	-3.89532	9.80676e-05	0.00389388	101.989	135.618	52.2938	30.1832
Nlgn2	2980.5	0.288177	0.314498	0.0740746	3.89037	0.000100093	0.00396434	2691.02	2623.88	3070.98	3536.15
Pdzd3	170.29	-0.490712	-1.50618	0.126342	-3.88401	0.000102749	0.00405935	207.165	296.244	123.044	54.707
Tgoln1	4116.6	-0.207155	-0.21613	0.0533648	-3.88186	0.00010366	0.00408514	4476.88	4371.52	3903.58	3714.42
Ebf3	381.735	0.450958	0.603683	0.116202	3.8808	0.000104113	0.00409279	308.091	298.168	436.807	483.874
Apln	912.702	-0.340623	-0.388433	0.0878709	-3.8764	0.000106012	0.00415707	1001.83	1067.63	783.381	797.968
Ndufa4l2	247.819	0.496597	0.775294	0.128225	3.87285	0.000107571	0.00420779	197.603	168.321	294.281	331.072
Cpsf2	5728.66	-0.192409	-0.199563	0.0497278	-3.86926	0.000109168	0.0042597	6239.37	6010.49	5224.25	5440.52
Btbd2	3322.61	0.210379	0.219886	0.0544023	3.86711	0.000110134	0.00428683	3090.47	3049.97	3512.91	3637.07
2410002F23Rik	2437.2	0.307409	0.340843	0.0795659	3.86357	0.00011174	0.00432818	2005.78	2294.93	2602.38	2845.71
Pde7a	4252.7	0.225606	0.237524	0.0583933	3.86356	0.000111744	0.00432818	4026.43	3781.92	4466.5	4735.93
Klhl2	2120.99	-0.260592	-0.279706	0.0674903	-3.86118	0.000112841	0.00435997	2271.37	2379.57	1974.86	1858.15
Cgn	1719.57	-0.284462	-0.310154	0.0737206	-3.85865	0.000114015	0.00439459	1909.1	1897.69	1605.73	1465.77
Reck	1284.23	-0.302687	-0.334735	0.0786921	-3.84647	0.00011983	0.00460747	1448.03	1416.78	1176.1	1096.03
Prlr	223.997	-0.506765	-1.22288	0.132045	-3.83781	0.000124138	0.00476155	312.341	314.519	180.465	88.6631
Hnf1b	726.772	-0.391744	-0.47613	0.102108	-3.83656	0.00012477	0.0047742	830.783	859.877	655.21	561.219
Gns	4521.73	-0.293756	-0.322851	0.0765936	-3.83525	0.000125435	0.00477759	4769.04	5280.46	4311.67	3725.74
Pcdh1	2048.96	-0.290469	-0.31846	0.0757377	-3.8352	0.000125463	0.00477759	2141.76	2405.54	1862.07	1786.47
Eea1	1813.53	-0.314453	-0.351402	0.0820402	-3.83291	0.000126635	0.00479909	2001.53	2064.09	1712.36	1476.15
Tmem88	1346.95	-0.315063	-0.35226	0.0821883	-3.83344	0.000126366	0.00479909	1576.58	1444.67	1224.29	1142.25
Cirbp	1028.11	0.369374	0.436457	0.096463	3.82918	0.000128571	0.00486079	831.846	915.664	1098.17	1266.75
Trim25	1308.63	-0.403016	-0.49859	0.105267	-3.82852	0.000128917	0.00486222	1408.72	1655.31	1202.76	967.749
Mreg	468.791	-0.462385	-0.647886	0.120842	-3.82637	0.000130046	0.00489312	522.692	621.343	401.944	329.185
Map2k2	4918.02	-0.210396	-0.220183	0.0551311	-3.81628	0.000135477	0.00508538	5119.62	5465.13	4454.2	4633.12
Gramd1b	1406.1	-0.37551	-0.447959	0.0984729	-3.81334	0.000137104	0.00513424	1513.9	1730.34	1300.17	1079.99
Hmgn3	595.027	0.418013	0.531816	0.109638	3.81266	0.000137479	0.00513611	531.191	442.443	719.808	686.668
Rab4a	1029.03	-0.405594	-0.505602	0.106517	-3.8078	0.000140207	0.0052134	1179.24	1234.99	957.694	744.204
Srsf10	7003.76	0.181952	0.18816	0.0477803	3.80809	0.000140042	0.0052134	6565.53	6530.84	7260.63	7658.04
Mllt4	11563.6	0.168414	0.173299	0.0442758	3.80374	0.000142526	0.0052872	10784.2	10956.2	11946.6	12567.5
Nabp1	1989.36	-0.279595	-0.304733	0.0735826	-3.79975	0.000144844	0.00536059	2173.64	2222.79	1876.42	1684.6
D930015E06Rik	2536.5	0.226434	0.238965	0.0596256	3.79759	0.000146108	0.00539471	2348.93	2305.51	2697.74	2793.83
Mpp3	337.264	0.496489	0.824723	0.130844	3.79451	0.000147934	0.00544091	236.911	250.076	352.727	509.341
Tmem231	507.986	0.418435	0.534702	0.110279	3.79432	0.000148047	0.00544091	439.826	390.504	576.257	625.358
Eng	837.907	0.342368	0.394258	0.090404	3.78709	0.000152422	0.00558867	739.418	708.87	976.15	927.19
Tmtc3	2268.72	-0.253277	-0.271505	0.0669365	-3.78383	0.00015443	0.00564922	2577.34	2386.3	2080.47	2030.76
Pcbd1	922.027	-0.397805	-0.491949	0.105186	-3.78191	0.000155627	0.00567664	1091.07	1063.79	854.132	679.122
Wdr1	7158.57	-0.226078	-0.238665	0.0597856	-3.78148	0.000155898	0.00567664	7590.72	7906.26	6912.01	6225.28
Cnnm1	80.2287	0.499026	1.21238	0.131999	3.78053	0.000156498	0.00568536	45.6825	50.9771	114.841	109.414
Zic1	237.838	0.501401	1.16305	0.13267	3.77931	0.000157266	0.00570016	190.167	103.878	375.285	282.024
Lrrc45	1121.66	0.360988	0.424809	0.0955677	3.7773	0.000158538	0.00573314	870.091	1044.55	1269.41	1302.59
Zdhhc9	1428.24	-0.361108	-0.425201	0.0956859	-3.77389	0.000160722	0.00579885	1598.89	1674.55	1346.31	1093.2
Gaa	1644.85	-0.284658	-0.311841	0.0754526	-3.77267	0.000161507	0.00580138	1743.37	1899.62	1497.04	1439.36
Syne2	3522.41	0.302132	0.335543	0.0800851	3.77264	0.000161527	0.00580138	3200.96	3027.85	4273.73	3587.08
Dennd2a	2751.88	0.214463	0.225147	0.0568707	3.77106	0.000162556	0.00582509	2550.78	2524.81	2931.53	3000.4
Lrp3	2287.87	0.241736	0.257514	0.0641516	3.7682	0.000164432	0.00583725	2099.27	2069.86	2416.79	2565.57
Nkd1	2279.15	0.238207	0.253238	0.0632045	3.76883	0.000164017	0.00583725	2092.89	2066.98	2414.74	2541.99
Slc40a1	648.597	-0.461512	-0.658856	0.122456	-3.7688	0.000164036	0.00583725	727.732	859.877	581.384	425.394
Stard4	2178.9	-0.329056	-0.37449	0.0873245	-3.76819	0.000164432	0.00583725	2422.23	2496.91	2083.55	1712.9
Tfcp2	764.126	0.362201	0.427347	0.0961326	3.76773	0.000164742	0.00583725	619.369	683.862	857.208	896.064
Nup160	5397.35	-0.174829	-0.180442	0.0464403	-3.76459	0.000166825	0.00589784	5800.61	5669.04	5026.35	5093.41
N4bp2	8108.19	0.19733	0.205567	0.05246	3.76153	0.000168876	0.00593174	7811.7	7253.17	8527.99	8839.9
Psmc5	9097.27	-0.150556	-0.154085	0.0400166	-3.76234	0.00016833	0.00593174	9535.95	9628.9	8630.52	8593.72
Tiam1	2546.89	0.219228	0.23076	0.0582824	3.76148	0.00016891	0.00593174	2315.99	2370.91	2752.09	2748.56
Met	1031.05	-0.315958	-0.355473	0.0840687	-3.75833	0.00017105	0.00599357	1190.93	1124.38	892.07	916.815
Ift172	1656.11	0.255978	0.275184	0.0681524	3.75596	0.000172679	0.00602394	1508.58	1488.92	1804.65	1822.31
Katnbl1	1118.77	-0.306148	-0.341522	0.0814995	-3.75645	0.000172343	0.00602394	1218.55	1282.12	1003.84	970.578
Cpox	2568.15	-0.314009	-0.352796	0.0836743	-3.75276	0.000174902	0.00608804	2627.27	3132.69	2322.46	2190.17
Stc2	1274.12	0.423198	0.55075	0.112807	3.7515	0.000175777	0.00610507	1114.44	954.137	1297.09	1730.82
Nemp2	628.251	0.384532	0.468803	0.102682	3.74487	0.000180489	0.00624128	519.505	534.778	689.047	769.671
Picalm	7453.33	-0.161034	-0.165425	0.0429993	-3.74504	0.000180364	0.00624128	7803.2	7956.27	7085.29	6968.54
Kdm3a	5348.04	0.225758	0.23859	0.0603436	3.74121	0.000183134	0.00631891	4942.2	4872.64	5488.8	6088.52
Ccnl1	3719.24	0.269076	0.29202	0.0719753	3.73845	0.000185155	0.00637475	3100.03	3586.67	4147.61	4042.66
Hspg2	7413.7	0.244178	0.260799	0.0653384	3.73712	0.000186141	0.00639475	6960.73	6529.87	8573.1	7591.07
Sec23a	4032.58	-0.228743	-0.242191	0.0612523	-3.73444	0.000188136	0.00644925	4504.5	4235.91	3834.88	3555.01
Agap1	2909.15	0.215563	0.226681	0.0577653	3.7317	0.00019019	0.00650476	2742.01	2620.99	3110.97	3162.63
Lrp5	4648.12	-0.191065	-0.198633	0.0512074	-3.73119	0.000190578	0.00650476	4900.77	5033.26	4422.41	4236.02
Psat1	10147.7	-0.190988	-0.198551	0.0512026	-3.73004	0.000191448	0.00652036	10656.8	11031.2	9803.54	9099.29
Abce1	15669.2	-0.157323	-0.16145	0.0422183	-3.72641	0.000194223	0.00660066	16966.3	16125.1	14840.2	14745.4
Hspa4l	1026.01	0.321761	0.364981	0.0864048	3.72387	0.00019619	0.00665321	926.398	867.572	1190.45	1119.61
Lrrc16a	1340.76	-0.280103	-0.30672	0.0752926	-3.7202	0.000199068	0.00673024	1493.71	1471.6	1225.31	1172.43
Tars	7213.74	-0.1575	-0.161657	0.04234	-3.71988	0.000199314	0.00673024	7671.47	7563.84	6810.49	6809.14
Asah1	1813.03	-0.337374	-0.389015	0.0907466	-3.71776	0.000200997	0.00677261	1991.97	2118.91	1722.62	1418.61
Wdr90	3434.89	0.257295	0.277318	0.0692363	3.71619	0.000202246	0.00680019	2903.49	3306.78	3749.77	3779.5
Rras2	3583.78	-0.227296	-0.240651	0.0612362	-3.71179	0.000205802	0.00690507	3993.5	3770.38	3400.12	3171.12
mt-Tp	504.953	0.46514	0.691117	0.125404	3.70914	0.000207965	0.00696285	414.329	358.763	527.039	719.681
Six3os1	456.192	0.454434	0.649912	0.122577	3.70734	0.000209452	0.00699781	406.893	303.939	564.978	548.957
Prelid2	587.025	0.377874	0.45891	0.101952	3.70638	0.000210244	0.00700945	511.006	478.03	693.149	665.917
Snx4	3093.7	-0.239774	-0.255749	0.0647289	-3.70427	0.000211998	0.00705305	3327.38	3405.85	2957.16	2684.42
Rhpn2	1485.3	-0.352844	-0.414743	0.0952933	-3.70272	0.000213304	0.00708162	1734.87	1659.16	1406.8	1140.36
Elfn1	197.624	0.488151	0.841316	0.131906	3.70076	0.000214956	0.0071215	145.546	137.542	281.976	225.431
Sod3	178.568	-0.480255	-1.27336	0.130112	-3.69107	0.000223311	0.0073828	232.662	272.198	141.501	67.9122
Atp6v1c1	2262.55	-0.263533	-0.285608	0.0714303	-3.68937	0.000224808	0.00741387	2414.8	2555.59	2135.84	1943.99
Gm36948	61.6009	0.428478	1.80891	0.116152	3.68894	0.000225189	0.00741387	16.9981	37.5114	75.8772	116.017
Agpat3	2448.24	-0.307704	-0.345442	0.0834369	-3.68787	0.000226141	0.00741476	2580.53	2898	2309.13	2005.3
Pccb	1172.02	-0.29591	-0.328786	0.080239	-3.68785	0.000226154	0.00741476	1270.61	1338.87	1056.13	1022.46
Serp1	9381.33	-0.177116	-0.183243	0.0480838	-3.68349	0.000230059	0.00752716	10196.7	9755.86	9000.68	8572.03
Slc25a10	1556.72	-0.312435	-0.352446	0.0848491	-3.68224	0.00023119	0.00754854	1659.44	1831.33	1445.77	1290.33
Nln	1237.73	-0.301746	-0.337167	0.0820119	-3.67929	0.000233885	0.00762078	1334.35	1428.32	1129.96	1058.3
Slc26a2	1988.08	-0.318674	-0.361809	0.0866673	-3.67698	0.000236014	0.00767435	2232.07	2239.14	1903.08	1578.02
Nrg1	504.037	0.39626	0.498084	0.107816	3.67533	0.000237545	0.00770825	439.826	396.275	589.587	590.459
Dffa	1832.72	-0.275149	-0.300985	0.0749198	-3.67258	0.000240112	0.00775968	2057.84	1988.11	1726.72	1558.21
Stard10	1165.62	-0.356469	-0.422384	0.0970537	-3.67291	0.000239804	0.00775968	1281.23	1387.92	1086.89	906.439
Timm17a	2166.04	-0.239166	-0.255351	0.0651691	-3.66993	0.00024262	0.00782475	2368.05	2345.91	2036.38	1913.8
AI314180	6262.22	0.178553	0.184904	0.0487143	3.6653	0.000247046	0.00795126	6012.02	5712.32	6600.29	6724.25
Kdm7a	2431.52	0.285976	0.315678	0.0780951	3.6619	0.000250351	0.00804126	2163.01	2170.85	2493.7	2898.53
Aldh7a1	6920.86	-0.284125	-0.3132	0.0776228	-3.66032	0.000251896	0.00807448	7329.38	8007.25	6711.03	5635.77
Ltbp4	400.067	0.421695	0.559728	0.115227	3.6597	0.000252508	0.0080777	333.588	313.557	453.213	499.909
Pank3	3127.76	-0.210251	-0.220974	0.0574772	-3.65799	0.000254205	0.00811555	3300.82	3431.82	2945.88	2832.5
Glipr2	1521.04	-0.386843	-0.480028	0.10577	-3.6574	0.000254782	0.00811758	1824.11	1718.79	1450.9	1090.37
Ist1	2894.34	0.213492	0.224768	0.058392	3.65618	0.000256	0.00813997	2607.09	2730.64	3158.13	3081.52
Senp8	1001.6	0.321332	0.366485	0.0879107	3.65521	0.000256973	0.00815449	848.844	901.236	1084.84	1171.49
Dgat2	1479.61	-0.385934	-0.478676	0.105697	-3.65134	0.000260878	0.00826182	1619.07	1825.56	1397.58	1076.22
Ajuba	7090.81	-0.206611	-0.216797	0.0566033	-3.65016	0.000262076	0.00827943	7896.69	7350.32	6342.93	6773.3
Gnpda1	944.752	-0.443892	-0.627365	0.121622	-3.64976	0.000262482	0.00827943	1099.57	1193.63	885.918	599.891
Tdp2	2363.24	0.229743	0.24414	0.0630092	3.64618	0.000266167	0.00837895	2226.75	2101.6	2543.94	2580.66
Cgref1	274.186	-0.486862	-0.968959	0.133739	-3.64039	0.000272231	0.0085528	327.214	398.198	231.733	139.597
Psmc3	9966.71	-0.152151	-0.156063	0.0418163	-3.63855	0.000274173	0.00859673	10566.5	10443.6	9582.06	9274.73
Rragc	1892.41	-0.33821	-0.393561	0.0929836	-3.6373	0.000275508	0.00862149	2003.65	2293.01	1777.99	1495.01
Mylk	957.587	0.312574	0.354168	0.086099	3.6304	0.000282983	0.00882048	867.967	813.71	1071.51	1077.16
Rnf14	2447.76	-0.21745	-0.229605	0.0598941	-3.63058	0.000282785	0.00882048	2596.46	2687.36	2254.78	2252.42
Clock	1436.86	-0.261221	-0.283514	0.0719955	-3.62829	0.000285305	0.00886821	1580.83	1574.52	1284.79	1307.31
Susd6	1455.66	-0.277064	-0.304314	0.0763686	-3.62799	0.000285637	0.00886821	1587.2	1629.34	1353.49	1252.6
Gcsh	4733.24	-0.262607	-0.285325	0.0724081	-3.62677	0.000286992	0.00889282	5109	5289.11	4598.78	3936.08
Gm16185	246.754	0.466053	0.732304	0.128573	3.6248	0.000289182	0.00894313	165.732	204.87	300.433	315.98
Lrrfip1	3538.22	-0.219504	-0.232086	0.0605686	-3.62405	0.00029003	0.00895184	3807.58	3835.78	3394.99	3114.53
Man2b2	874.416	-0.379882	-0.468849	0.10485	-3.6231	0.000291097	0.00896727	1010.33	1019.54	814.142	653.655
H2-Q2	75.2391	-0.445815	-1.52039	0.123093	-3.62177	0.000292591	0.00897055	79.6787	143.313	43.0655	34.8993
Synj1	1095.82	-0.356727	-0.425571	0.09848	-3.62233	0.000291962	0.00897055	1191.99	1319.63	1016.14	855.505
Trpm6	151.86	-0.483014	-1.05432	0.133374	-3.62149	0.000292907	0.00897055	172.106	237.572	113.816	83.947
Gga2	10001.6	-0.158875	-0.163404	0.0439096	-3.61824	0.000296617	0.009055	10509.1	10624.4	9652.82	9220.02
Ranbp2	13846.2	-0.162598	-0.167466	0.0449405	-3.61807	0.00029681	0.009055	14943.5	14354.4	13343.1	12743.9
Zfp62	2207.95	0.269852	0.29496	0.0746486	3.61496	0.000300397	0.00914678	1983.47	1983.3	2282.47	2582.55
Fam53b	1217.49	0.291443	0.324234	0.080642	3.61404	0.000301467	0.0091617	1096.38	1066.67	1305.29	1401.63
Elk3	898.995	0.35043	0.415214	0.0970334	3.61143	0.000304511	0.00923645	831.846	709.832	1035.62	1018.68
Mgat2	2439.31	-0.238518	-0.2552	0.0661098	-3.60791	0.000308674	0.00934479	2695.27	2613.3	2313.23	2135.46
Cercam	483.098	0.390015	0.491234	0.108149	3.60629	0.000310604	0.00938523	385.645	417.435	556.775	572.537
Pde6c	76.5811	-0.459197	-1.35503	0.127439	-3.60329	0.00031422	0.00947638	98.8016	121.191	53.3191	33.0129
Hoxa2	275.671	0.461547	0.719261	0.128153	3.60153	0.000316345	0.00952228	214.601	201.985	381.437	304.662
Ankrd13a	4076.95	-0.206543	-0.217032	0.0573688	-3.60027	0.00031789	0.00955061	4232.53	4532.15	3840	3703.1
Atcayos	68.9291	0.468215	1.24755	0.130089	3.59919	0.000319216	0.00955323	40.3705	41.3588	90.2324	103.755
Enpep	250.941	-0.463072	-0.729259	0.128677	-3.59872	0.000319791	0.00955323	300.654	325.099	209.175	168.837
Sgpl1	4474.79	-0.211496	-0.222826	0.0587609	-3.59926	0.000319121	0.00955323	4771.16	4866.87	4313.72	3947.4
Ces2b	74.2984	-0.443259	-1.50316	0.123293	-3.59516	0.000324189	0.00966634	103.051	116.382	52.2938	25.4671
Clptm1	4906.95	-0.192661	-0.201089	0.0536021	-3.59428	0.000325295	0.00968106	5099.44	5395.88	4653.12	4479.37
Csrp2	5593.22	-0.163833	-0.168897	0.0456161	-3.59157	0.000328692	0.00974545	5975.9	5865.25	5235.53	5296.21
Rpl5	544.397	0.395435	0.504572	0.110096	3.59174	0.000328475	0.00974545	412.205	487.649	631.627	646.109
Def8	2547.9	-0.2171	-0.229514	0.0605011	-3.58836	0.000332769	0.00984785	2765.38	2734.49	2403.46	2288.26
Cep131	1431.86	0.290578	0.323666	0.0810328	3.58593	0.000335873	0.00988775	1273.8	1270.58	1503.19	1679.88
Fxyd2	123.362	-0.472113	-1.16308	0.131662	-3.58579	0.00033606	0.00988775	145.546	195.252	92.2831	60.3664
Qprt	705.686	-0.398509	-0.512343	0.111149	-3.58535	0.00033662	0.00988775	873.279	785.816	643.931	519.717
mt-Ta	150.103	0.453129	1.38453	0.12636	3.58601	0.000335773	0.00988775	104.114	62.5191	151.754	282.024
Ucp2	604.019	-0.389785	-0.492943	0.108764	-3.58377	0.000338676	0.00992968	711.796	700.213	547.547	456.521
Lix1	573.701	0.431123	0.600824	0.120345	3.5824	0.000340447	0.00996311	512.068	400.122	751.595	631.017
Ldha	80931	0.201461	0.211275	0.056297	3.57854	0.000345524	0.010093	79625.6	70408	85092.2	88598
mt-Nd2	40791.2	-0.154366	-0.158607	0.0431531	-3.57717	0.000347337	0.0101273	42317.9	43745.1	37356.2	39745.6
Cst3	2632.42	-0.2446	-0.263105	0.0683939	-3.57634	0.000348445	0.0101408	2871.62	2871.07	2521.38	2265.63
Fignl1	5174.96	0.179381	0.186178	0.0501674	3.57564	0.000349369	0.010149	4959.2	4724.52	5559.55	5456.56
Crybg3	1682.55	0.241259	0.25901	0.0675802	3.56997	0.000357022	0.0103334	1528.77	1535.08	1825.16	1841.17
Six6	32.1478	0.409107	1.82067	0.114592	3.5701	0.00035684	0.0103334	15.9357	12.5038	49.2177	50.9341
Camta1	1265.95	0.305797	0.345959	0.0856797	3.56907	0.000358247	0.0103499	1127.19	1103.22	1329.9	1503.5
4632404H12Rik	228.962	0.452137	0.686497	0.126728	3.56779	0.000360001	0.0103627	171.044	179.863	281.976	282.967
Card10	996.426	-0.360097	-0.434901	0.100917	-3.56827	0.000359346	0.0103627	1150.56	1139.77	935.136	760.239
Sulf2	5014.62	0.170997	0.176874	0.0479409	3.56682	0.000361342	0.0103823	4766.91	4648.53	5377.03	5266.02
Rbm38	1821.55	-0.259757	-0.282583	0.0728879	-3.56379	0.000365539	0.0104839	1915.48	2082.37	1675.45	1612.91
Flcn	1646.67	-0.303983	-0.3435	0.0853455	-3.56179	0.000368336	0.010545	1713.62	1968.87	1507.29	1396.92
Evi5	2573.6	-0.281108	-0.311133	0.0789797	-3.55924	0.00037193	0.0106286	2721.82	2976.87	2452.68	2143.01
Fzd6	406.107	-0.41043	-0.545248	0.115336	-3.55857	0.000372882	0.0106362	512.068	452.061	330.169	330.129
Lrpap1	3539.58	-0.434329	-0.616927	0.122068	-3.5581	0.000373542	0.0106362	4245.28	4324.39	3132.5	2456.16
Cbl	4539.35	0.175469	0.181889	0.0493584	3.555	0.000377972	0.010743	4249.53	4257.07	4906.39	4744.42
Zfp821	1071.33	0.295628	0.331592	0.0831732	3.55437	0.00037888	0.0107494	920.023	977.221	1175.07	1212.99
Dcaf13	2557.32	-0.215827	-0.22828	0.0607442	-3.55305	0.00038079	0.010765	2797.25	2721.02	2408.59	2302.41
Wnt2	1276.51	-0.269203	-0.295164	0.0757568	-3.55351	0.000380125	0.010765	1388.53	1424.47	1154.56	1138.47
Prkcb	257.583	0.442903	0.653076	0.124866	3.54704	0.00038959	0.0109941	197.603	202.946	302.484	327.299
Akr1b8	454.159	-0.43455	-0.621315	0.122578	-3.5451	0.000392459	0.0110553	518.443	581.908	405.02	311.264
Emb	23695.2	-0.439228	-0.638846	0.123946	-3.54371	0.000394536	0.011094	27596.5	30117.8	20705.3	16361.2
Inadl	1661.68	-0.253763	-0.275169	0.0716396	-3.54222	0.000396775	0.0111174	1810.3	1828.44	1554.46	1453.51
Pptc7	1315.67	-0.263976	-0.288437	0.074517	-3.54249	0.000396363	0.0111174	1448.03	1445.63	1173.02	1196.01
B4galnt3	325.416	-0.448126	-0.678515	0.126581	-3.54023	0.00039978	0.0111424	390.957	409.74	284.027	216.942
Slc2a3	101683	-0.321465	-0.370722	0.0907928	-3.54065	0.000399149	0.0111424	117532	111819	94742	82637.8
Stim1	848.057	-0.39604	-0.51172	0.111845	-3.54097	0.000398658	0.0111424	966.768	1026.27	793.635	605.55
Ccnt2	5244.97	0.242354	0.260729	0.0684661	3.53976	0.000400486	0.0111424	4706.36	4838.97	5319.61	6114.93
Itga9	2671.3	0.200467	0.210373	0.0566606	3.53803	0.000403125	0.0111961	2472.16	2481.53	2866.93	2864.57
Khnyn	2645.08	0.264451	0.289164	0.0747827	3.53627	0.000405827	0.011212	2383.99	2378.61	2706.97	3110.76
Rnf6	1254.35	-0.269825	-0.296296	0.0762923	-3.53673	0.000405119	0.011212	1370.47	1394.66	1140.21	1112.06
2003-09-01	2604.33	0.269034	0.295241	0.0760674	3.53678	0.000405042	0.011212	2506.16	2172.78	2811.56	2926.83
Apela	416.687	-0.405378	-0.536081	0.114807	-3.53095	0.000414069	0.0114198	497.195	489.572	316.839	363.142
Casq1	278.44	0.434915	0.627726	0.123295	3.52742	0.000419628	0.0115529	223.1	214.488	351.701	324.469
Plod1	1411.22	0.284493	0.316539	0.080671	3.52659	0.000420951	0.0115692	1326.92	1187.86	1571.89	1558.21
Tmod1	502.923	0.387236	0.493389	0.109877	3.52425	0.000424676	0.0116513	415.392	420.32	550.623	625.358
Coro1c	8544.91	-0.14601	-0.149698	0.041468	-3.52102	0.000429883	0.0117737	8987.76	8987.35	8193.72	8010.81
Glul	8858.58	-0.241818	-0.260301	0.0687009	-3.51987	0.000431764	0.0118048	9438.21	9871.28	8670.51	7454.31
Tcf7	1899.83	0.243383	0.262306	0.0691979	3.5172	0.000436121	0.0119033	1790.11	1665.89	2056.89	2086.41
Tnfrsf12a	290.304	-0.469048	-0.997601	0.133562	-3.51182	0.000445048	0.012126	354.836	418.397	251.215	136.768
Asb1	948.101	-0.352179	-0.424037	0.100338	-3.50991	0.00044826	0.0121822	989.078	1183.05	833.624	786.649
Dlc1	3620.01	0.258903	0.282317	0.0737683	3.50968	0.000448653	0.0121822	3391.13	3144.23	3707.73	4236.97
Atp6ap2	1993.45	-0.249641	-0.270365	0.0711655	-3.50789	0.000451669	0.0122431	2079.08	2279.54	1810.8	1804.39
Nhp2	4610.15	-0.173177	-0.179525	0.0494046	-3.50527	0.000456139	0.0123431	4846.59	4945.74	4389.6	4258.66
Myo15b	199.539	-0.466004	-0.858342	0.133193	-3.4987	0.000467524	0.0126295	248.598	265.466	167.135	116.96
Cul4b	7648.88	-0.180304	-0.187558	0.0515768	-3.49583	0.000472592	0.0127447	8411.95	7879.32	7291.39	7012.88
Arhgap1	4041.75	-0.187379	-0.195582	0.0536175	-3.49474	0.000474532	0.0127752	4311.15	4318.62	3872.82	3664.43
Ephx2	352.147	-0.417194	-0.575725	0.11942	-3.4935	0.000476726	0.0128124	397.331	445.328	294.281	271.649
Fads1	4097.84	0.210724	0.222695	0.0603268	3.49305	0.000477543	0.0128126	3872.39	3693.43	4235.8	4589.73
Wdr7	1461.82	-0.274351	-0.303277	0.0785698	-3.49181	0.000479767	0.0128504	1545.77	1683.21	1341.18	1277.13
2810459M11Rik	387.487	-0.46661	-0.946327	0.133743	-3.48885	0.000485098	0.0129493	450.45	569.404	341.448	188.645
Tm9sf2	6636.17	-0.175352	-0.182021	0.0502548	-3.48926	0.000484352	0.0129493	6907.61	7199.31	6374.71	6063.05
Hoxd3	246.273	0.464381	0.852215	0.133154	3.48755	0.000487475	0.012969	138.11	212.565	325.042	309.378
Lysmd3	1105.36	-0.280955	-0.312482	0.0805538	-3.48779	0.000487024	0.012969	1244.05	1205.17	999.734	972.465
Prox1	623.796	0.365448	0.451054	0.104855	3.48528	0.000491629	0.0130575	554.564	500.152	684.946	755.523
Casc4	2606.89	-0.200953	-0.211287	0.0576902	-3.48332	0.000495236	0.0131312	2827	2768.15	2416.79	2415.6
Eif5a	39846.8	-0.113164	-0.114885	0.0324966	-3.48233	0.000497067	0.0131577	41835.6	41030.8	38063.7	38457.2
Arhgap29	8718.48	-0.187909	-0.196259	0.0539878	-3.48057	0.00050034	0.0132222	9729.3	8893.09	8168.08	8083.44
Bcl9l	1584.35	-0.257577	-0.281075	0.0740348	-3.47914	0.000503028	0.0132489	1692.38	1783.24	1472.43	1389.37
Tnni3	229.545	0.456884	0.770329	0.131312	3.47938	0.000502578	0.0132489	168.919	170.244	328.118	250.898
Efr3a	3502.12	-0.198083	-0.208031	0.0570756	-3.47053	0.000519431	0.0136225	3872.39	3636.69	3268.87	3230.54
Khdrbs3	1891.35	0.229878	0.246032	0.0662491	3.4699	0.000520659	0.0136225	1726.37	1734.18	2094.83	2010.01
Mrpl20	2212.81	-0.227158	-0.242688	0.0654599	-3.47019	0.000520091	0.0136225	2428.61	2368.03	2091.75	1962.85
Rab1a	9853.69	-0.16207	-0.167338	0.0467069	-3.46993	0.000520596	0.0136225	10439	10408.9	9565.66	9001.19
Acox1	1780.41	-0.325124	-0.379533	0.0937259	-3.46889	0.00052262	0.0136287	1921.85	2103.53	1703.14	1393.14
Zswim5	1308.63	0.260936	0.285669	0.075216	3.46915	0.000522105	0.0136287	1171.81	1186.9	1459.1	1416.72
Gnptab	2058.51	-0.271668	-0.30013	0.0783661	-3.46666	0.000526972	0.0136969	2161.95	2380.53	1940	1751.57
Plekhg1	1008.56	0.322758	0.375792	0.0930994	3.46681	0.000526674	0.0136969	934.897	821.404	1178.15	1099.8
Atp5d	4299.67	-0.169751	-0.175864	0.0489988	-3.46439	0.000531435	0.0137355	4524.69	4597.56	4068.66	4007.76
Gm43300	104.068	0.456389	1.12069	0.131713	3.46502	0.000530196	0.0137355	50.9944	79.832	148.678	136.768
Mark1	1013.42	0.310254	0.356078	0.0895617	3.46414	0.000531931	0.0137355	894.526	883.923	1073.56	1201.67
Smpx	168.034	0.462355	0.871034	0.133441	3.46488	0.000530468	0.0137355	135.985	101.954	204.048	230.147
Mpp2	1355.68	0.355421	0.433157	0.102627	3.46324	0.000533708	0.0137589	1250.42	1058.01	1409.88	1704.41
Atp6v0a2	2109.8	-0.217825	-0.231434	0.0629308	-3.46134	0.000537496	0.0138115	2245.88	2311.28	1927.69	1954.36
Greb1	4275.76	0.225527	0.240778	0.0651559	3.46135	0.000537468	0.0138115	3908.51	3931.97	4357.81	4904.77
Kynu	148.136	-0.462543	-0.96728	0.133661	-3.46058	0.000539022	0.0138282	175.293	216.412	116.892	83.947
Arhgef5	960.016	-0.348192	-0.419958	0.100666	-3.45888	0.000542434	0.0138932	1034.76	1161.89	886.943	756.466
Tmem120a	1209.22	-0.295605	-0.334194	0.0854737	-3.45844	0.000543321	0.0138934	1326.92	1369.65	1132.01	1008.31
Higd1a	1869.86	0.246926	0.267661	0.0715053	3.45325	0.000553884	0.0141178	1742.31	1652.43	1972.81	2111.88
Mfsd7c	233.847	-0.459031	-1.04277	0.132918	-3.4535	0.000553358	0.0141178	266.658	362.611	194.82	111.301
Ap1b1	4911.23	-0.191717	-0.200779	0.0555323	-3.45235	0.000555732	0.0141421	5082.44	5420.88	4672.6	4469
Rab17	142.257	-0.455114	-1.10582	0.131892	-3.45066	0.000559208	0.0142077	178.48	209.679	114.841	66.0257
Tnrc18	4566.72	0.179007	0.186306	0.0518961	3.44933	0.00056197	0.0142549	4387.64	4158	4843.84	4877.42
Myo18a	4075.89	-0.200925	-0.21151	0.0583226	-3.44507	0.000570915	0.0144586	4236.78	4510.03	3881.02	3675.75
Cutal	58.3555	-0.437266	-1.31079	0.12697	-3.44386	0.000573469	0.014496	79.6787	86.5648	37.9386	29.24
Diaph1	3685.13	-0.185333	-0.193515	0.0538278	-3.44307	0.000575143	0.014496	4003.06	3861.75	3385.77	3489.93
Eif4g2	90914.3	-0.163244	-0.168722	0.0474109	-3.44318	0.000574918	0.014496	100727	91724.1	85521.8	85684.4
Ltbp1	2101.02	0.256407	0.280184	0.0745358	3.44005	0.000581612	0.0146124	2003.65	1792.85	2247.61	2359.95
Slc35g1	1788.83	-0.237985	-0.256472	0.0691774	-3.44021	0.000581263	0.0146124	1906.98	1987.14	1666.22	1594.99
Arpc5	3789.5	-0.238215	-0.256851	0.0693862	-3.43317	0.000596557	0.0148229	4043.43	4207.05	3676.97	3230.54
Dll1	423	0.380486	0.488007	0.110814	3.43357	0.000595688	0.0148229	346.337	357.801	498.329	489.534
Egln3	779.236	0.411836	0.570914	0.119877	3.43551	0.00059145	0.0148229	676.738	578.061	791.584	1070.56
Rnd2	1017.22	0.337989	0.403105	0.0984212	3.4341	0.00059452	0.0148229	852.031	899.313	1260.18	1057.36
Tmem50b	625.604	0.351971	0.428641	0.102485	3.43437	0.000593928	0.0148229	542.878	524.198	679.819	755.523
Tob2	1362.09	-0.305387	-0.34963	0.0889322	-3.43393	0.000594901	0.0148229	1417.22	1635.11	1156.62	1239.4
Vcan	19129.8	0.162537	0.167973	0.0473389	3.43347	0.000595914	0.0148229	17396.5	18637.4	19878.8	20606.6
Vcl	3595.01	-0.21927	-0.233449	0.0638907	-3.43195	0.000599251	0.0148665	3987.12	3784.81	3154.03	3454.09
Notch3	4763.62	0.229448	0.245954	0.0669275	3.42831	0.000607342	0.0150436	4519.38	4199.36	4884.85	5450.9
Gtf2a1	1369.53	0.276758	0.308094	0.0808431	3.42339	0.000618452	0.0152948	1278.05	1170.55	1470.38	1559.15
Ppp4r1l-ps	885.447	0.308373	0.354645	0.0900898	3.42295	0.000619445	0.0152955	750.042	804.091	968.973	1018.68
F5	201.69	-0.447682	-0.743604	0.130834	-3.42175	0.000622191	0.0153393	264.533	240.458	164.059	137.711
Dnmt3b	8650.91	-0.216946	-0.230757	0.0634532	-3.419	0.000628528	0.0154269	9446.71	9237.43	7438.02	8481.48
Tex2	985.72	-0.349047	-0.424168	0.102091	-3.41899	0.000628532	0.0154269	1097.44	1160.93	928.983	755.523
Ythdc1	4925.64	0.203491	0.214706	0.059519	3.41893	0.000628675	0.0154269	4355.77	4762.99	5179.13	5404.68
Elovl1	1291.24	-0.365984	-0.457802	0.107083	-3.41775	0.000631407	0.01547	1437.4	1550.47	1237.62	939.452
Psmd6	5931.14	-0.158666	-0.163759	0.0464344	-3.41699	0.000633166	0.015489	6367.92	6167.26	5638.5	5550.88
Slc16a13	1151.51	-0.334316	-0.397677	0.0978743	-3.41576	0.000636032	0.0155351	1306.73	1310.98	1095.09	893.234
Jdp2	404.921	-0.419034	-0.60054	0.122765	-3.41329	0.000641845	0.0156347	480.197	495.343	364.006	280.138
Sumo3	6831.58	-0.175256	-0.182239	0.0513467	-3.41318	0.000642088	0.0156347	7398.43	7126.21	6596.19	6205.48
Asl	1423.35	-0.312101	-0.361019	0.0915352	-3.40963	0.000650508	0.0157756	1565.95	1634.15	1358.61	1134.7
Trip12	19506.9	-0.121651	-0.123895	0.0356736	-3.4101	0.000649396	0.0157756	20536.9	20151.3	18764.2	18574.9
Uso1	5365.69	-0.172304	-0.178937	0.0505366	-3.40948	0.000650869	0.0157756	5715.62	5679.62	5175.03	4892.51
Gldc	6723.92	-0.393405	-0.523001	0.115463	-3.40718	0.000656374	0.0158847	7823.39	8035.14	6105.04	4932.12
Ankfy1	4009.8	-0.171733	-0.17832	0.0504552	-3.40367	0.000664861	0.0160654	4246.34	4268.61	3710.81	3813.46
BC025446	201.646	-0.437741	-1.22697	0.128655	-3.40243	0.000667906	0.0161144	276.22	288.549	169.186	72.6283
Espn	455.638	-0.427271	-0.63689	0.125624	-3.4012	0.000670913	0.0161623	514.193	594.412	411.173	302.775
Jade1	3199.23	-0.269207	-0.298192	0.0792358	-3.39754	0.000679954	0.0163551	3403.87	3652.07	3102.76	2638.2
Galm	736.845	-0.408977	-0.570643	0.120485	-3.39441	0.000687759	0.0165177	787.226	973.374	673.667	513.114
Dram1	192.93	-0.438858	-1.1951	0.129386	-3.39184	0.000694244	0.0166308	213.539	323.175	154.831	80.1741
Hspbap1	1509.16	-0.239606	-0.259159	0.0706445	-3.39171	0.000694572	0.0166308	1636.07	1652.43	1384.25	1363.9
2700097O09Rik	910.932	0.363147	0.454344	0.107126	3.3899	0.000699192	0.0166908	725.607	811.786	943.339	1163
2810417H13Rik	8212.78	0.219961	0.234694	0.0648805	3.39024	0.000698303	0.0166908	8061.36	7032.91	8767.92	8988.93
Aplnr	3546.05	-0.182515	-0.190582	0.0538576	-3.38885	0.000701876	0.0167296	3700.28	3858.87	3318.09	3306.95
Nebl	3919.61	0.263084	0.290114	0.0777503	3.3837	0.000715151	0.0170204	3669.47	3385.65	3972.28	4651.04
Slc1a3	726.579	-0.337787	-0.405832	0.0999042	-3.38111	0.000721941	0.0171561	795.725	859.877	659.312	591.402
Hnrnpa1	3031.09	0.218057	0.232469	0.0645081	3.3803	0.000724059	0.0171741	2702.7	2872.03	3154.03	3395.61
Sowahb	489.456	-0.432974	-0.673548	0.128099	-3.38	0.000724868	0.0171741	626.806	576.137	451.162	303.718
Itsn1	6904.77	0.162689	0.168332	0.0481476	3.37897	0.00072757	0.0172123	6534.72	6471.2	7108.88	7504.3
Syngap1	2117.72	0.29765	0.339805	0.0881792	3.37551	0.000736798	0.0174045	1804.99	1934.24	2148.15	2583.49
Eftud2	12553.9	-0.137874	-0.141251	0.0408612	-3.3742	0.000740294	0.0174522	13275.5	13061.7	11733.3	12145
Usp51	474.798	-0.382738	-0.500614	0.11344	-3.37393	0.000741026	0.0174522	553.501	558.824	426.553	360.312
Adcy9	100.648	-0.448598	-1.01564	0.132983	-3.37335	0.000742593	0.0174631	130.673	138.504	75.8772	57.5367
Actr1a	5776.08	-0.167759	-0.174002	0.0497469	-3.37226	0.000745552	0.0174956	6106.58	6140.33	5580.05	5277.34
Mpp7	718.359	-0.322655	-0.379932	0.095686	-3.37202	0.000746191	0.0174956	824.409	800.244	647.007	601.777
Plekha2	1267.26	0.255332	0.280006	0.0758194	3.36764	0.000758156	0.0177498	1152.69	1136.88	1375.02	1404.46
Mapk14	6496.13	-0.16819	-0.174505	0.0499549	-3.36684	0.000760341	0.0177747	6854.49	6921.34	6293.71	5914.96
Mib2	691.611	0.322766	0.380383	0.0958803	3.36635	0.000761713	0.0177804	583.248	618.458	776.204	788.536
Unc13b	1182.7	0.262272	0.289412	0.0779708	3.36372	0.000768986	0.0179237	1074.07	1055.13	1285.81	1315.8
Dnmt1	17688.3	0.13821	0.141644	0.0411393	3.35957	0.000780637	0.0181132	17235	16407.9	18520.2	18590
Fam117a	1067.02	-0.276435	-0.309162	0.082292	-3.35919	0.000781702	0.0181132	1177.12	1184.98	926.933	979.067
Rplp0	34691.4	-0.110652	-0.112382	0.0329319	-3.36002	0.000779358	0.0181132	36078.5	36006.2	32985.1	33695.8
Ssr2	5352.14	-0.170709	-0.17736	0.0508177	-3.35924	0.00078156	0.0181132	5662.5	5697.89	5168.88	4879.3
Trh	592.402	-0.351822	-0.433915	0.104748	-3.35876	0.000782923	0.018115	658.677	703.099	476.796	531.036
Igsf23	180.422	-0.448042	-0.969059	0.133438	-3.35769	0.000785958	0.0181586	195.478	281.817	142.526	101.868
Ivns1abp	23706.1	0.136849	0.140184	0.0407687	3.35671	0.000788758	0.0181967	22810.4	22302	24259.2	25452.9
Csrp3	498.219	0.366867	0.465808	0.109372	3.35431	0.000795628	0.0183018	409.017	428.015	546.521	609.323
Phyh	728.845	-0.408249	-0.577482	0.1217	-3.35455	0.000794949	0.0183018	813.785	931.053	682.895	487.647
Mid1ip1	781.688	-0.339424	-0.410622	0.101236	-3.3528	0.000799978	0.0183751	912.587	871.419	724.935	617.812
Slc16a10	658.78	-0.433989	-0.697524	0.129631	-3.34789	0.000814293	0.0186767	710.734	918.549	604.967	400.871
Atp6v1e1	3128.92	-0.262333	-0.289845	0.0784004	-3.34607	0.000819666	0.0187456	3272.14	3610.72	3012.53	2620.28
Ippk	1206.55	-0.286047	-0.323396	0.0854807	-3.34633	0.000818883	0.0187456	1333.29	1348.49	1136.11	1008.31
Heatr3	4149.87	-0.176143	-0.183559	0.0526654	-3.34457	0.000824105	0.0188198	4524.69	4303.23	3877.94	3893.63
Mfge8	1968.86	0.259106	0.28552	0.0774956	3.34349	0.000827308	0.0188657	1884.67	1665.89	2110.21	2214.69
Snx2	3176.05	-0.300044	-0.344736	0.0898451	-3.33957	0.000839073	0.0191064	3415.56	3690.55	3108.92	2489.17
Cep170b	3094.39	-0.195176	-0.205515	0.0584705	-3.33803	0.000843761	0.0191855	3220.08	3407.77	2905.89	2843.82
L1cam	247.527	0.437564	0.735871	0.131241	3.33404	0.000855946	0.0194315	194.416	176.977	352.727	265.989
Pygm	129.461	0.445481	0.862891	0.133646	3.33329	0.000858266	0.0194315	92.4273	91.374	154.831	179.213
Zfp809	326.258	-0.410437	-0.590846	0.12313	-3.33335	0.000858061	0.0194315	356.961	427.053	263.52	257.5
Sec62	4335	-0.183301	-0.19179	0.0550126	-3.33198	0.0008623	0.0194949	4740.35	4505.22	4140.44	3954
Adipor1	4857.43	-0.166842	-0.173149	0.0501107	-3.32948	0.000870089	0.0195759	5066.5	5229.48	4644.92	4488.81
C77080	1269.05	-0.321863	-0.380679	0.0966645	-3.32969	0.000869436	0.0195759	1360.91	1509.11	1200.71	1005.48
Hdlbp	29059.2	-0.127691	-0.13043	0.0383544	-3.32924	0.000870839	0.0195759	30198.2	30543.9	28364.8	27130
Myl9	1898.98	0.224476	0.2409	0.0674168	3.32968	0.000869472	0.0195759	1783.74	1698.59	2027.15	2086.41
Tead4	950.92	-0.393452	-0.536611	0.118263	-3.32694	0.000878062	0.0196823	1087.88	1162.85	911.552	641.393
Wwc2	3900.37	-0.179954	-0.187983	0.054085	-3.32725	0.000877071	0.0196823	4226.16	4082.01	3724.14	3569.16
Eid1	3684.28	0.256398	0.282218	0.0771107	3.32506	0.000883988	0.0197058	3598.29	3052.85	4152.74	3933.25
Fgfr2	4801.29	-0.207105	-0.219749	0.0622871	-3.32501	0.00088414	0.0197058	5446.84	4887.07	4394.73	4476.54
Ildr2	2415.94	0.311067	0.362829	0.0935326	3.32576	0.000881764	0.0197058	2359.55	1868.84	2808.48	2626.88
Ldb3	1124.03	0.354897	0.442991	0.106748	3.32463	0.000885346	0.0197058	996.515	909.893	1137.13	1452.57
Sft2d2	2328.35	-0.202585	-0.214351	0.0609239	-3.32521	0.000883518	0.0197058	2512.54	2489.22	2192.24	2119.43
Zfp976	491.815	-0.353799	-0.441246	0.106599	-3.31897	0.000903498	0.0200815	569.437	563.633	405.02	429.167
Sfxn1	4545.35	-0.171979	-0.178974	0.0518356	-3.31777	0.000907376	0.0201394	4861.46	4791.84	4373.19	4154.91
Ift140	1984.93	0.220581	0.236221	0.0665055	3.31673	0.000910784	0.0201867	1851.73	1793.82	2197.36	2096.79
Mapk12	1284.99	0.270011	0.301174	0.0814568	3.31478	0.000917149	0.0202993	1207.93	1095.53	1403.73	1432.76
Usp47	8457.56	-0.172331	-0.179393	0.0520141	-3.31316	0.000922472	0.0203886	9231.04	8734.39	8168.08	7696.71
Lypd6	321.663	-0.404894	-0.576944	0.122294	-3.31082	0.000930244	0.0205316	381.395	388.58	279.925	236.749
Sec13	4975.55	-0.165986	-0.172274	0.0501669	-3.30867	0.000937415	0.020661	5159.99	5383.37	4735.15	4623.69
Ehhadh	249.583	-0.439992	-0.803475	0.133088	-3.30603	0.000946286	0.0208275	278.344	355.878	212.251	151.859
Cbx7	1002.47	-0.389954	-0.53033	0.11798	-3.30526	0.000948873	0.0208415	991.203	1377.34	872.588	768.728
Smyd1	1950.4	0.244288	0.266486	0.0739133	3.30506	0.000949561	0.0208415	1831.55	1711.1	2040.48	2218.46
Rmst	87.6363	0.432201	1.11177	0.130789	3.30456	0.000951245	0.0208495	65.8677	45.2061	128.171	111.301
Syt13	340.85	-0.417957	-0.631861	0.126522	-3.30342	0.00095512	0.0208766	394.144	434.748	231.733	302.775
Wnt2b	280.792	-0.435959	-0.751872	0.131958	-3.30378	0.00095391	0.0208766	380.333	324.137	246.088	172.61
Il6st	5120.01	-0.157432	-0.162777	0.0476702	-3.30253	0.000958169	0.0209143	5339.54	5476.67	4880.75	4783.09
Ubr5	15851.2	-0.148096	-0.152518	0.0448814	-3.29973	0.000967791	0.0210952	16868.5	16509.8	14562.3	15464.2
Ret	578.777	0.367732	0.473904	0.111479	3.29866	0.000971477	0.0211463	531.191	438.595	651.109	694.213
Pitpnc1	1097.91	0.27835	0.313532	0.0844096	3.29762	0.000975097	0.021196	1005.01	953.175	1259.15	1174.31
Naglu	192.865	0.429151	0.700066	0.130184	3.29649	0.000979025	0.0212521	147.671	146.198	251.215	226.374
Plg	254.389	-0.440005	-0.939493	0.133532	-3.29512	0.000983785	0.0213261	355.898	312.595	224.556	124.506
Fzd10	889.651	0.288209	0.328313	0.0875758	3.29097	0.000998431	0.0215924	809.536	768.503	986.404	994.159
Slc25a15	1813.91	-0.254431	-0.280219	0.0773143	-3.29086	0.000998801	0.0215924	1982.41	1995.8	1739.02	1538.4
Prpf40b	1684.68	0.314242	0.369679	0.095504	3.29035	0.00100063	0.0216024	1321.6	1617.8	1801.57	1997.75
Bin1	2921.94	0.18085	0.189215	0.0549838	3.28915	0.00100492	0.0216107	2745.2	2716.21	3109.94	3116.41
Depdc7	417.676	-0.426656	-0.686916	0.129694	-3.28972	0.00100288	0.0216107	475.947	554.015	380.412	260.33
Ikzf2	486.873	0.367241	0.473818	0.111654	3.28909	0.00100512	0.0216107	379.271	435.71	549.597	582.913
Rccd1	649.213	0.376071	0.495463	0.114373	3.28811	0.00100861	0.0216563	489.758	587.679	693.149	826.265
Atp6v1b2	6378.31	-0.208291	-0.221529	0.0634037	-3.28516	0.00101924	0.0218548	6763.13	6969.43	6249.62	5531.07
Ift81	1218.62	0.315484	0.372124	0.0960629	3.28414	0.00102293	0.021878	1166.5	958.946	1395.53	1353.53
Lrrc19	245.687	-0.438147	-0.94788	0.13343	-3.28372	0.00102447	0.021878	288.968	357.801	214.302	121.676
Zfp207	14076.4	-0.134229	-0.137518	0.040875	-3.28388	0.00102389	0.021878	15026.3	14468.8	13285.7	13524.9
Dcbld1	1179.04	-0.284072	-0.322358	0.0865217	-3.28324	0.0010262	0.0218853	1331.17	1288.85	1110.47	985.67
Skiv2l2	7789.17	-0.158813	-0.164385	0.0484038	-3.281	0.00103438	0.0220302	8465.07	8000.52	7433.92	7257.17
Gm43980	315.818	0.436338	0.976112	0.133084	3.27867	0.00104299	0.0221836	156.17	269.313	332.219	505.568
Mgst3	335.979	-0.435927	-0.791377	0.133005	-3.27753	0.00104718	0.0222428	376.083	475.145	298.382	194.304
Col9a1	590.704	0.384102	0.519289	0.117317	3.27404	0.0010602	0.0224816	550.314	421.282	717.758	673.463
Glud1	5669.85	-0.152245	-0.157148	0.0465046	-3.27376	0.00106127	0.0224816	5916.41	6039.34	5429.32	5294.32
Aak1	3531.29	-0.169068	-0.175892	0.0516568	-3.2729	0.00106449	0.0224896	3740.65	3752.11	3292.46	3339.96
Ngfrap1	13181.8	-0.132501	-0.135683	0.0404832	-3.27299	0.00106417	0.0224896	13797.2	13804.2	12799.7	12326.1
Zfp689	361.381	0.387038	0.528397	0.118335	3.27071	0.0010728	0.0226347	309.153	282.778	447.06	406.53
Adgra2	4147.9	-0.191338	-0.201491	0.0585168	-3.2698	0.00107624	0.022677	4249.53	4623.52	3863.59	3854.96
Cacna2d1	393.426	-0.374141	-0.493565	0.114504	-3.26749	0.00108506	0.022828	462.137	457.832	342.473	311.264
Ncapg2	4048.2	-0.25277	-0.27843	0.0773667	-3.26717	0.00108629	0.022828	4821.09	4055.08	3721.06	3595.57
Lap3	6986.76	-0.145944	-0.150268	0.0447176	-3.26367	0.00109979	0.0230809	7306.01	7393.6	6732.57	6514.85
Lhfpl2	1801.55	-0.217458	-0.232952	0.0666518	-3.26259	0.00110399	0.0231078	1964.35	1929.43	1634.44	1678
Scd2	27775.2	0.150615	0.15539	0.0461631	3.26267	0.00110367	0.0231078	26763.5	25800.2	28262.2	30274.7
Egr1	88.0086	0.426495	1.09593	0.130771	3.26139	0.00110866	0.0231442	44.6201	67.3282	124.07	116.017
Slc38a3	403.07	0.404169	0.587908	0.123925	3.26141	0.00110859	0.0231442	336.775	307.786	423.477	544.241
Appbp2	8065.08	-0.145958	-0.150292	0.0447589	-3.26099	0.00111024	0.0231467	8540.5	8428.53	7803.05	7488.26
Fsd2	152.007	0.435218	0.826009	0.133509	3.25983	0.00111479	0.0231804	124.299	95.2213	198.921	189.588
Wsb1	5501.15	0.185785	0.195082	0.0569919	3.25984	0.00111475	0.0231804	4985.76	5273.72	5664.13	6080.97
Pkm	101058	0.168358	0.175154	0.0516558	3.25924	0.00111713	0.0231983	99745	90118.8	104708	109659
Dkk1	728.014	-0.34271	-0.4237	0.105169	-3.25867	0.00111936	0.0232142	764.916	903.16	598.815	645.166
Capn2	3252.67	-0.21527	-0.230308	0.0660792	-3.25776	0.00112296	0.0232278	3464.43	3557.82	3154.03	2834.39
Sall4	7063.19	-0.226445	-0.24423	0.069508	-3.25782	0.0011227	0.0232278	7729.9	7590.77	5963.54	6968.54
Lpcat3	1778.16	-0.251202	-0.276503	0.0771184	-3.25736	0.00112455	0.0232304	1906.98	1988.11	1698.01	1519.54
Snai2	582.635	-0.374076	-0.495031	0.114891	-3.25593	0.00113023	0.0233173	678.863	683.862	542.42	425.394
AW549877	3592.64	0.178655	0.186891	0.0549029	3.25402	0.00113785	0.0234415	3417.69	3303.89	3748.75	3900.23
Hip1	9163.43	0.193232	0.20383	0.0593888	3.25368	0.00113922	0.0234415	8699.85	8336.19	9283.68	10334
Eno1	21995.5	0.212831	0.227359	0.0654201	3.2533	0.00114073	0.023442	21039.4	19494.4	22102.8	25345.4
Aff4	9813.31	-0.189587	-0.199565	0.0582976	-3.25206	0.00114573	0.0235143	10879.9	10104	8748.44	9520.91
Kbtbd8	1886.32	-0.234313	-0.254366	0.0720788	-3.25078	0.00115088	0.0235893	2144.95	1960.21	1709.29	1730.82
Fgf3	468.496	0.398778	0.571237	0.122726	3.24933	0.00115678	0.0236795	416.454	337.603	616.246	503.682
2700046A07Rik	117.818	0.428533	1.03963	0.131915	3.24855	0.00115997	0.023714	84.9906	69.2519	189.693	127.335
Gm45221	29.9324	0.350732	1.85368	0.107984	3.248	0.0011622	0.0237291	8.49906	17.313	42.0401	51.8774
Mthfr	2267.23	-0.223818	-0.241058	0.0689308	-3.24699	0.00116632	0.0237638	2349.99	2561.36	2117.39	2040.2
Myadm	2160.06	-0.259236	-0.287688	0.0798446	-3.24675	0.00116729	0.0237638	2366.99	2381.5	2095.85	1795.9
Tmem9	2700.94	-0.21452	-0.229505	0.0660777	-3.24648	0.00116842	0.0237638	2928.99	2900.88	2605.46	2368.44
Haghl	358.342	0.386832	0.532465	0.119183	3.2457	0.0011716	0.023798	274.095	311.633	408.096	439.543
Mpp1	778.582	-0.396533	-0.564664	0.122268	-3.24314	0.00118219	0.0239821	863.717	993.572	738.265	518.774
Tal2	367.256	0.394736	0.559829	0.121894	3.23834	0.00120227	0.0243583	319.777	274.122	468.593	406.53
Crtap	1281.81	-0.304727	-0.356323	0.094116	-3.23778	0.00120465	0.0243753	1390.66	1486.99	1224.29	1025.29
Mfsd7b	1127.14	-0.266508	-0.298107	0.0823398	-3.23668	0.00120929	0.0244379	1203.68	1282.12	1030.49	992.273
Ryr2	1637.96	0.342132	0.424512	0.10578	3.23437	0.00121911	0.0246049	1217.49	1579.33	1743.13	2011.9
B4galt5	1832.81	-0.295818	-0.342126	0.0914962	-3.23312	0.00122448	0.0246502	2031.28	2066.01	1785.17	1448.79
Serpinb6a	1406.36	-0.343536	-0.427509	0.106249	-3.2333	0.0012237	0.0246502	1580.83	1644.73	1369.89	1030
Aqp11	356.638	-0.403451	-0.594862	0.124891	-3.23041	0.00123612	0.0248213	404.768	453.023	317.864	250.898
Sertad2	1753.14	-0.223461	-0.240819	0.069173	-3.23046	0.0012359	0.0248213	1942.04	1856.33	1632.39	1581.79
Hoxa5	48.0891	0.380336	1.51541	0.117767	3.22955	0.00123985	0.0248646	30.8091	19.2366	57.4206	84.8902
Stag1	6463.85	-0.139504	-0.14335	0.0432224	-3.22758	0.00124842	0.0250047	6779.06	6790.53	6114.27	6171.52
H19	124034	-0.156669	-0.162212	0.0485968	-3.22385	0.00126481	0.0252426	129834	132164	122839	111301
Rpe	2117.01	-0.252761	-0.279265	0.0783914	-3.22435	0.00126261	0.0252426	2283.06	2358.41	2047.66	1778.92
Zfp532	3871.94	0.216232	0.231863	0.0670738	3.22379	0.00126508	0.0252426	3540.92	3582.82	3926.13	4437.87
Gpr157	148.514	-0.429814	-0.939722	0.133341	-3.22342	0.00126669	0.0252428	168.919	221.221	119.968	83.947
Cacna2d2	1217.92	0.302227	0.353158	0.0939634	3.21643	0.00129797	0.0258047	1096.38	1043.59	1249.92	1481.81
Mogat2	2592.83	-0.239647	-0.261851	0.0745082	-3.21639	0.00129816	0.0258047	2916.24	2738.33	2503.95	2212.81
Sdhd	5419.17	-0.210434	-0.224845	0.0655104	-3.21222	0.00131712	0.026116	5954.66	5725.78	5309.36	4686.88
Zdhhc15	2020.38	-0.258011	-0.286754	0.0803199	-3.21229	0.00131682	0.026116	2340.43	2100.64	1914.36	1726.1
Dmtf1	3428.04	0.17459	0.182466	0.0543613	3.21166	0.00131969	0.0261341	3142.53	3279.85	3645.18	3644.62
Lad1	892.966	-0.35133	-0.446239	0.109436	-3.21037	0.00132564	0.0261864	932.772	1126.3	822.345	690.441
Slc25a36	2911.66	0.183712	0.192989	0.0572229	3.21046	0.00132521	0.0261864	2670.83	2763.34	3065.85	3146.6
Mtmr4	5996.37	0.163391	0.16978	0.050903	3.20985	0.00132806	0.0262013	5541.39	5745.02	6516.21	6182.84
Dennd4b	478.785	0.370134	0.491632	0.115344	3.20896	0.00133215	0.0262492	382.458	413.588	511.659	607.437
Scly	1047.69	-0.301841	-0.352986	0.0941394	-3.20632	0.00134444	0.0264585	1136.75	1212.87	988.455	852.675
Slc25a5	5601.79	-0.154491	-0.15987	0.0482297	-3.20324	0.00135892	0.026677	6005.65	5818.12	5373.95	5209.43
Utp20	7626.66	-0.152473	-0.157633	0.0475983	-3.20333	0.00135848	0.026677	7828.7	8256.36	7142.71	7278.87
Ap1g1	5850.41	-0.150336	-0.155278	0.0469559	-3.20164	0.00136647	0.0267587	6108.7	6220.16	5631.32	5441.46
Lrrn4	1719.52	-0.42702	-0.796857	0.133374	-3.20168	0.00136629	0.0267587	2310.68	2054.47	1462.17	1050.75
Tbrg1	6055.01	-0.234589	-0.255471	0.0732806	-3.20125	0.00136834	0.0267622	6410.42	6767.45	5967.64	5074.55
Usp15	5475.21	-0.159131	-0.165054	0.0497539	-3.19837	0.00138208	0.0269975	5913.22	5664.23	5083.77	5239.61
Adamts2	522.72	-0.420632	-0.714212	0.131555	-3.19738	0.00138683	0.027057	640.617	657.893	495.253	297.116
A830082K12Rik	265.327	0.409178	0.636446	0.128073	3.19487	0.00139893	0.0270757	224.163	191.404	348.625	297.116
Adrbk2	606.847	0.328254	0.40034	0.102761	3.19434	0.0014015	0.0270757	506.757	539.588	661.362	719.681
Cacna1g	1511.38	0.230854	0.250731	0.0722674	3.19444	0.00140104	0.0270757	1377.91	1383.11	1603.68	1680.83
Itpr3	1406.23	-0.272863	-0.30841	0.0854084	-3.1948	0.00139927	0.0270757	1529.83	1581.25	1344.26	1169.6
Lsr	1676.25	-0.248774	-0.274432	0.0778753	-3.19451	0.00140067	0.0270757	1848.55	1822.67	1429.36	1604.43
Msx2	1027.18	-0.280817	-0.320269	0.0879092	-3.1944	0.00140123	0.0270757	1083.63	1197.48	902.324	925.304
Pcbp3	763.445	0.31652	0.378638	0.0990276	3.19628	0.00139213	0.0270757	710.734	617.496	864.385	861.164
Phldb2	3815.07	-0.175456	-0.183548	0.0549102	-3.19533	0.00139669	0.0270757	4055.12	4058.93	3678	3468.24
Zfp839	511.418	0.346283	0.436933	0.108433	3.19351	0.00140557	0.0271211	435.577	433.786	554.724	621.585
Dmgdh	42.3223	-0.379482	-1.45961	0.118878	-3.1922	0.00141194	0.0272109	50.9944	73.0992	22.5581	22.6374
Eif4h	21383.6	-0.116734	-0.119006	0.0366041	-3.18909	0.0014272	0.0274714	22602.2	21928.8	20550.4	20452.9
Cers2	3644.07	-0.21226	-0.227343	0.0665732	-3.18838	0.00143075	0.0275062	3775.71	4083.94	3507.78	3208.85
Brsk2	339.534	0.385621	0.541217	0.120987	3.18728	0.00143615	0.0275766	299.592	253.924	400.919	403.7
Zfp518a	2666.18	0.201841	0.214652	0.0633619	3.18553	0.00144488	0.0277104	2564.59	2372.84	2849.5	2877.78
Chordc1	5824.83	0.141467	0.145615	0.0444991	3.17909	0.00147739	0.0282997	5564.76	5497.83	6114.27	6122.47
Serpinc1	132.159	-0.402645	-1.20349	0.126828	-3.17473	0.00149975	0.0286932	150.858	217.374	106.638	53.7638
Mup6	14.5604	-0.294815	-2.47749	0.092878	-3.17421	0.00150243	0.0287096	23.3724	25.9695	5.12684	3.7729
Lrrc41	1797.03	-0.211397	-0.226445	0.0666252	-3.17292	0.00150913	0.0288028	1910.16	1965.02	1664.17	1648.76
Shoc2	4164.83	-0.164192	-0.170862	0.0518074	-3.16927	0.00152822	0.0291321	4487.5	4334.97	3974.33	3862.51
Tpcn1	4355.43	-0.381438	-0.531452	0.120374	-3.16879	0.00153077	0.0291456	4933.71	5363.17	3952.79	3172.07
D630045J12Rik	1685.48	0.278095	0.317016	0.0877737	3.16832	0.00153324	0.029149	1610.57	1392.73	1773.89	1964.74
Slc34a2	203.196	-0.410731	-1.10442	0.129648	-3.16805	0.00153464	0.029149	247.535	306.824	176.363	82.0606
Ncapd2	18132.5	0.135033	0.13865	0.0426334	3.16731	0.00153855	0.0291531	17610.1	16915.7	18625.8	19378.6
Nploc4	5764.24	-0.150452	-0.155522	0.0475004	-3.16738	0.00153819	0.0291531	6139.51	6009.52	5551.34	5356.57
Plin3	3254.02	-0.244546	-0.269266	0.0772367	-3.16619	0.00154451	0.0292165	3377.31	3734.79	3147.88	2756.1
Scyl2	3149	-0.180127	-0.189108	0.0568943	-3.16598	0.00154559	0.0292165	3355	3355.83	2865.9	3019.26
Ddx17	29123.1	0.120716	0.123275	0.0381414	3.16495	0.00155109	0.0292855	27802.6	27957.6	29690.6	31041.5
Zic3	1401.19	-0.349092	-0.446238	0.11038	-3.16263	0.00156352	0.0294848	1525.58	1707.25	1008.96	1362.96
Kdr	4706.61	0.199338	0.211868	0.0631019	3.15899	0.00158318	0.029802	4177.29	4545.62	4859.22	5244.33
Srm	7095.11	-0.157075	-0.162914	0.049726	-3.15882	0.00158411	0.029802	7285.82	7704.27	6585.94	6804.42
Hspa12b	673.303	-0.313915	-0.376225	0.0994087	-3.15782	0.00158954	0.0298041	788.288	732.916	607.018	564.992
Mtcl1	3665.47	0.18712	0.19733	0.0592479	3.15825	0.00158719	0.0298041	3545.17	3286.58	3855.38	3974.75
Tmem8	295.092	-0.407727	-0.647814	0.129119	-3.15776	0.00158988	0.0298041	331.463	388.58	259.418	200.907
Mapk8ip3	2964.73	0.28623	0.329943	0.0906875	3.15623	0.00159825	0.0299256	2359.55	2894.15	3105.84	3499.36
Gm23455	118.014	0.418168	0.976583	0.132519	3.15553	0.00160209	0.0299265	61.6182	97.145	154.831	158.462
Slc30a9	4240.49	0.164786	0.171595	0.0522183	3.1557	0.00160111	0.0299265	4054.05	3924.27	4408.06	4575.58
Ctif	827.953	0.280298	0.320824	0.0888464	3.15486	0.00160573	0.029959	741.543	730.992	930.009	909.269
Tceanc	253.838	0.393208	0.578071	0.124672	3.15394	0.0016108	0.0300182	209.289	198.137	300.433	307.491
BC024139	93.6923	0.41661	0.999331	0.132108	3.15355	0.001613	0.0300238	58.4311	66.3664	141.501	108.471
Msx1	1924.25	-0.287272	-0.331708	0.0911142	-3.15287	0.00161672	0.0300576	1949.47	2339.17	1619.06	1789.3
Wnt8b	202.554	0.415182	0.711333	0.131778	3.15063	0.00162919	0.030254	167.856	139.466	272.748	230.147
Arhgef16	686.866	-0.339335	-0.426285	0.107746	-3.14938	0.00163616	0.0303477	828.659	746.381	635.728	536.695
Hdac5	2285.72	0.20128	0.214328	0.0639579	3.14708	0.0016491	0.0305518	2124.77	2108.33	2381.93	2527.84
Bora	2053.5	0.228202	0.248016	0.0725268	3.14645	0.00165267	0.0305822	1778.43	1975.6	2206.59	2253.36
Fcho2	1712.48	0.217855	0.234838	0.0692843	3.14436	0.00166448	0.0307647	1552.14	1594.72	1812.85	1890.22
Gpsm1	2741.04	-0.182091	-0.191583	0.058048	-3.1369	0.00170744	0.0315165	2959.8	2886.46	2519.33	2598.58
Zfp827	331.207	0.383021	0.544534	0.122113	3.13661	0.00170914	0.0315165	280.469	258.733	364.006	421.621
Ap1s3	371.352	-0.361138	-0.479004	0.115167	-3.13579	0.00171394	0.0315369	440.889	424.168	302.484	317.867
Spint1	1386.61	-0.231536	-0.252521	0.0738377	-3.13573	0.00171425	0.0315369	1479.9	1535.08	1269.41	1262.03
Necab2	297.957	0.378207	0.528914	0.120668	3.13429	0.00172272	0.031656	246.473	241.42	356.828	347.107
Xirp1	667.755	0.385623	0.55507	0.123147	3.1314	0.00173973	0.0319314	528.004	554.015	655.21	933.793
Pno1	3834.19	-0.16749	-0.174788	0.053502	-3.13055	0.00174482	0.0319877	4163.48	3969.48	3619.55	3584.25
Adora2b	393.957	-0.418049	-0.832808	0.133743	-3.12576	0.00177344	0.0323622	474.885	533.817	368.107	199.02
Fam120c	344.987	0.37984	0.535966	0.121483	3.1267	0.00176779	0.0323622	256.034	306.824	415.274	401.814
Guf1	2224.74	0.237307	0.260299	0.0759104	3.12615	0.00177111	0.0323622	1972.84	2076.59	2277.34	2572.17
Zmynd8	5626.21	0.166342	0.173503	0.0532108	3.12609	0.00177147	0.0323622	5254.55	5322.78	5751.29	6176.24
Ap1m2	872.968	-0.309682	-0.370629	0.099129	-3.12403	0.0017839	0.0324092	980.579	987.801	826.447	697.043
Bche	654.197	-0.332496	-0.414224	0.106414	-3.12454	0.00178084	0.0324092	795.725	699.252	592.663	529.149
Ppp6r1	6491.19	-0.136831	-0.14071	0.0438001	-3.12398	0.00178422	0.0324092	6829	6785.72	6233.21	6116.81
Ubn2	3821.18	0.168925	0.176454	0.054066	3.12442	0.00178154	0.0324092	3529.24	3646.3	3971.25	4137.93
Osbpl11	2610.21	-0.184746	-0.194806	0.0591931	-3.12108	0.00180188	0.0326564	2806.82	2765.27	2482.42	2386.36
Rab5a	2539.18	-0.185056	-0.195169	0.0592924	-3.12107	0.00180196	0.0326564	2734.57	2687.36	2328.61	2406.17
Arl4c	2915.61	-0.178209	-0.18717	0.0571121	-3.12034	0.0018064	0.0326994	3050.1	3158.65	2695.69	2757.99
Fbxo10	943.612	0.277703	0.318091	0.0890446	3.1187	0.00181649	0.0328364	866.904	813.71	1011.01	1082.82
Plbd1	251.968	-0.411702	-0.989626	0.132022	-3.11844	0.00181812	0.0328364	319.777	350.107	227.632	110.357
Adamts20	376.043	0.357038	0.471361	0.114598	3.11556	0.00183598	0.0331209	319.777	310.672	427.578	446.145
Ncor2	4703.64	0.174598	0.183029	0.0560744	3.11369	0.00184763	0.0332791	4286.71	4524.46	4857.17	5146.23
Slc11a2	2169.35	-0.21513	-0.231793	0.0690975	-3.11343	0.00184929	0.0332791	2245.88	2440.17	1961.53	2029.82
Slc43a1	1332.45	0.240775	0.265193	0.0773416	3.11314	0.00185106	0.0332791	1172.87	1247.5	1431.41	1478.03
Cchcr1	763.659	0.294797	0.345693	0.0947724	3.11058	0.00186723	0.0335316	642.742	702.137	843.878	865.88
Abcb10	1104.13	-0.311087	-0.37401	0.100053	-3.10923	0.00187576	0.0336084	1136.75	1355.22	1017.17	907.382
Lcmt2	510.807	0.337985	0.427246	0.108702	3.10929	0.00187539	0.0336084	462.137	409.74	575.231	596.118
Atp13a3	7944.42	-0.164967	-0.172029	0.0530699	-3.10849	0.00188045	0.0336544	8698.79	8138.06	7278.06	7662.76
Clip1	3880.29	0.173833	0.182182	0.0559347	3.10779	0.00188493	0.0336645	3731.09	3541.46	4039.95	4208.67
Rc3h2	2449.92	-0.208899	-0.22408	0.0672189	-3.10773	0.00188528	0.0336645	2749.45	2530.58	2304	2215.64
Ndel1	1744.26	-0.279808	-0.321774	0.0900779	-3.10629	0.0018945	0.0337909	1783.74	2091.02	1636.49	1465.77
Kctd10	2511.19	-0.212654	-0.228811	0.0685273	-3.1032	0.00191439	0.0341072	2578.4	2840.29	2349.12	2276.94
Dpysl5	5421.01	0.204772	0.219041	0.0660072	3.10228	0.00192039	0.0341757	5285.35	4737.02	5611.84	6049.84
Serf1	309.116	0.388892	0.577628	0.125377	3.10179	0.00192352	0.0341928	276.22	220.259	371.183	368.801
Ankrd33b	232.65	-0.413914	-0.884369	0.133521	-3.09999	0.00193526	0.0343481	254.972	348.183	201.998	125.449
Cdk17	1390.72	0.232912	0.254941	0.0751485	3.09936	0.00193937	0.0343481	1266.36	1269.62	1555.48	1471.43
Fam84b	1451.84	-0.310247	-0.373107	0.100101	-3.09933	0.00193962	0.0343481	1618.01	1658.2	1419.11	1112.06
Psme4	13226.5	-0.143705	-0.148306	0.0463742	-3.09882	0.00194294	0.0343481	14357	13456	12459.2	12633.6
Pygo1	402.689	0.384167	0.559247	0.123973	3.09879	0.00194313	0.0343481	371.834	279.893	479.872	479.158
Spint2	2319.76	-0.226614	-0.24673	0.0731995	-3.09585	0.0019625	0.0346519	2376.55	2657.54	2171.73	2073.21
Itga5	4079.9	-0.222102	-0.240905	0.071751	-3.09546	0.00196509	0.0346589	4421.64	4416.73	4021.49	3459.75
Rbm19	2457	-0.182638	-0.19254	0.0590836	-3.09117	0.00199369	0.035124	2618.77	2622.91	2265.04	2321.28
Abcc4	925.142	-0.313903	-0.380444	0.101589	-3.08992	0.00200209	0.0352328	1060.26	1032.05	883.867	724.397
Wscd1	904.363	0.321572	0.395124	0.104089	3.08939	0.0020057	0.035257	848.844	714.641	960.77	1093.2
Foxf1	877.311	-0.298767	-0.353458	0.0967191	-3.08902	0.00200821	0.0352619	964.644	1003.19	826.447	714.964
Npepps	6442.93	0.138971	0.143143	0.0449966	3.08847	0.00201187	0.035287	6080.02	6167.26	6670.02	6854.41
Lactb2	1179.3	-0.250782	-0.279493	0.0812105	-3.08805	0.00201478	0.0352988	1245.11	1340.79	1066.38	1064.9
Flt4	1150.57	0.247243	0.274583	0.0800842	3.08728	0.00201995	0.0353224	1066.63	1016.66	1243.77	1275.24
Gpc3	19039.3	-0.155544	-0.161492	0.0503836	-3.08719	0.00202059	0.0353224	20376.5	19830.1	18748.9	17201.6
Gxylt1	3335.28	-0.164847	-0.172008	0.0534277	-3.08543	0.00203259	0.0354928	3569.61	3498.18	3166.34	3106.98
Slc30a1	1143.69	-0.261615	-0.295069	0.0848043	-3.08492	0.00203604	0.0355138	1206.87	1312.9	1056.13	998.875
Nars	9862.4	-0.122397	-0.125218	0.039694	-3.08352	0.00204569	0.0356051	10246.7	10333	9499.01	9370.94
Trak1	1403.42	0.230884	0.252528	0.0748773	3.0835	0.00204578	0.0356051	1289.73	1272.5	1484.73	1566.7
Rpl11	579.843	0.365672	0.50034	0.11861	3.08298	0.00204941	0.0356291	419.641	540.549	635.728	723.453
Ppp1r16b	617.378	-0.365678	-0.500595	0.118638	-3.08231	0.002054	0.0356697	818.035	629.038	541.394	481.045
Farp1	4402.25	0.165008	0.172208	0.0535407	3.08192	0.0020567	0.0356774	4201.72	4079.13	4540.33	4787.81
Nup153	10593.9	-0.130249	-0.133675	0.0422674	-3.08156	0.00205921	0.0356817	11186.9	10983.2	9923.51	10282.1
Gm26813	116.392	0.39994	1.0641	0.129902	3.07877	0.00207854	0.0359771	53.1191	97.145	168.16	147.143
Reep1	1245.21	0.27021	0.308096	0.0878328	3.07641	0.0020951	0.0362241	1177.12	1049.36	1320.67	1433.7
Zeb1	1819.78	0.222233	0.241361	0.0722553	3.07566	0.00210035	0.0362753	1697.69	1638.96	1892.83	2049.63
Eif4g1	57931.5	-0.0942748	-0.0955469	0.0306594	-3.0749	0.00210571	0.036328	60358.2	59341.2	55839.5	56187
Ndufb9	2557.51	-0.181249	-0.191036	0.0589702	-3.07357	0.00211511	0.0364505	2760.07	2693.13	2417.82	2359.01
Tomm70a	13701.3	-0.133169	-0.136863	0.0433509	-3.07188	0.00212718	0.0366185	14687.4	14015.8	12883.7	13218.4
2610318N02Rik	1258	0.25086	0.280077	0.0817654	3.06805	0.0021546	0.0368854	1092.13	1180.17	1340.16	1419.55
Ank3	3506.36	0.243053	0.269197	0.0792135	3.06833	0.0021526	0.0368854	2949.17	3410.65	3626.73	4038.89
Dact2	1073.85	-0.265668	-0.301524	0.0865849	-3.0683	0.00215284	0.0368854	1129.31	1241.72	944.364	980.011
Erdr1	247.846	-0.40708	-0.723575	0.132647	-3.06889	0.00214854	0.0368854	329.339	288.549	152.78	220.715
Tecr	4928.74	0.142707	0.147305	0.0465183	3.06776	0.00215669	0.0368854	4663.86	4690.85	5155.55	5204.71
Zfp711	855.415	-0.287058	-0.334842	0.0935401	-3.06883	0.002149	0.0368854	999.702	908.931	778.254	734.772
Abl2	4016.48	-0.153591	-0.159398	0.0501162	-3.0647	0.00217886	0.0372244	4263.34	4212.82	3833.85	3755.92
Lima1	2099.33	-0.230828	-0.252883	0.0754669	-3.05867	0.00222325	0.0379418	2233.13	2331.48	2030.23	1802.5
Ndufs1	4761.3	-0.161255	-0.168061	0.0527279	-3.05825	0.00222635	0.0379537	5090.94	4985.17	4615.18	4353.93
Dusp27	500.056	0.336382	0.429047	0.110043	3.05683	0.00223692	0.0380927	421.766	430.901	537.293	610.266
Efnb2	6066.84	0.178123	0.187495	0.0582894	3.05583	0.00224436	0.038136	5957.84	5390.1	6417.78	6501.65
Ppp1r21	1366.32	-0.277329	-0.319796	0.0907632	-3.05552	0.0022467	0.038136	1459.71	1573.56	1311.45	1120.55
Zfp316	553.878	0.313285	0.381598	0.102515	3.05599	0.00224316	0.038136	491.883	470.336	632.652	620.642
Hras	2447.37	-0.18069	-0.19051	0.0591421	-3.05519	0.0022492	0.0381374	2614.52	2602.72	2313.23	2259.02
Dlat	3221.42	-0.164741	-0.172045	0.0539316	-3.05464	0.00225331	0.0381662	3393.25	3432.78	3065.85	2993.8
Foxh1	1458.21	-0.337691	-0.432368	0.110614	-3.05287	0.00226664	0.0383509	1571.26	1779.39	1055.1	1427.1
Arfgef2	2080.61	-0.239677	-0.264954	0.0785814	-3.05005	0.00228803	0.0386301	2117.33	2423.82	1929.74	1851.55
Fgd6	1492.56	0.218168	0.236501	0.0715243	3.05027	0.00228639	0.0386301	1392.78	1348.49	1617.01	1611.97
Morf4l2	12548.5	-0.158941	-0.165483	0.0521235	-3.04931	0.00229368	0.0386841	13203.3	13330	12362.9	11297.9
Dzip1	1049.17	0.273277	0.313813	0.0896945	3.04676	0.00231324	0.0389725	995.453	876.229	1164.82	1160.17
Grin3a	143.581	0.406847	0.854571	0.13363	3.04458	0.00233008	0.0391312	98.8016	105.801	152.78	216.942
Kansl1	3741.55	0.16385	0.171077	0.053806	3.04521	0.00232522	0.0391312	3443.18	3596.29	3918.96	4007.76
Smcr8	2443.16	-0.207421	-0.222966	0.0681281	-3.04458	0.00233009	0.0391312	2540.16	2722.95	2177.88	2331.65
Tmed7	6531.88	-0.157843	-0.164282	0.051906	-3.04095	0.00235835	0.0395637	7126.46	6680.88	6260.9	6059.28
Zhx2	645.757	0.30611	0.369269	0.100692	3.04006	0.00236531	0.0396383	592.81	534.778	718.783	736.659
Impact	3011.77	-0.177346	-0.186699	0.0583489	-3.03941	0.00237044	0.0396532	3206.27	3205.78	2898.72	2736.3
Nfatc4	1324.08	0.267766	0.305604	0.0881008	3.03931	0.00237121	0.0396532	1193.06	1176.32	1355.54	1571.41
Zbtb7b	519.893	-0.351561	-0.468326	0.115692	-3.03877	0.00237547	0.0396824	542.878	663.664	454.238	418.792
Actn4	15712.4	-0.127178	-0.130459	0.0418846	-3.0364	0.00239425	0.0398998	16676.2	16168.4	15296.4	14708.6
Atp6v0b	1858.55	-0.289198	-0.339856	0.0952608	-3.03585	0.00239858	0.0398998	1884.67	2267.04	1755.43	1527.08
Hif3a	438.402	0.336836	0.432403	0.110943	3.03612	0.00239643	0.0398998	388.832	357.801	501.405	505.568
Morc4	2726.42	-0.402102	-0.940202	0.132451	-3.03586	0.00239852	0.0398998	3114.91	4054.12	2185.06	1551.6
Nptx2	782.165	-0.3272	-0.4111	0.107801	-3.03522	0.00240363	0.0399417	841.407	944.519	607.018	735.715
Tmem101	1065.95	0.260836	0.295447	0.0860115	3.03257	0.00242478	0.0402508	996.515	918.549	1143.29	1205.44
Lman2l	1526.66	0.230457	0.252875	0.0760345	3.03096	0.0024378	0.0404244	1336.48	1449.48	1631.36	1689.32
Man1a	1127.18	-0.332598	-0.423345	0.109745	-3.03064	0.00244035	0.0404244	1274.86	1307.13	1103.3	823.435
Sac3d1	1122.13	-0.265664	-0.302747	0.0876987	-3.02927	0.00245142	0.0405652	1227.05	1252.3	943.339	1065.84
Gapdh	6267.64	0.207244	0.222942	0.0684404	3.02809	0.00246105	0.0406394	5393.72	6174	6541.85	6961
Slc25a39	4376.71	-0.148791	-0.154182	0.0491368	-3.0281	0.002461	0.0406394	4552.31	4667.77	4162.99	4123.78
Copb1	7163.91	-0.170814	-0.179201	0.0564953	-3.02351	0.00249859	0.0411733	7772.39	7443.61	7012.49	6427.13
Prrc2a	28803.4	0.125187	0.128339	0.0414033	3.02359	0.00249791	0.0411733	27249.1	27797.9	29251.7	30915.1
Krt10	168.908	0.399351	0.692783	0.132105	3.02298	0.002503	0.041203	127.486	130.809	193.795	223.544
Habp2	260.282	-0.397693	-0.978215	0.131582	-3.02239	0.00250787	0.0412402	310.216	379.923	236.86	114.13
Cacna1c	658.146	0.331595	0.422153	0.109785	3.02041	0.00252431	0.0414594	536.503	588.641	684.946	822.492
Irx3	2671.62	0.238162	0.263495	0.0788575	3.02016	0.00252645	0.0414594	2321.31	2535.39	2716.2	3113.59
Arhgap18	625.486	-0.389131	-0.614574	0.12886	-3.01979	0.00252951	0.0414667	761.728	751.19	607.018	382.006
Fat1	9610.07	0.128936	0.132404	0.0427204	3.01814	0.00254335	0.0416072	9098.25	9239.35	10228	9874.62
Sumf1	845.991	-0.294262	-0.349374	0.0974885	-3.01843	0.00254091	0.0416072	897.713	997.419	782.356	706.475
Otud4	12959.7	-0.11851	-0.121182	0.0392772	-3.01728	0.00255052	0.0416814	13579.4	13429.1	12244.9	12585.4
Samhd1	5697.17	-0.235287	-0.259727	0.0780954	-3.01282	0.00258833	0.0421818	5968.47	6447.16	5644.65	4728.39
Tacstd2	226.915	-0.394482	-0.65653	0.130923	-3.01307	0.00258616	0.0421818	297.467	257.771	195.845	156.575
Timm13	3295.58	-0.186272	-0.197454	0.0618285	-3.01272	0.00258915	0.0421818	3399.62	3640.53	3154.03	2988.14
Mrpl49	2314.81	-0.192301	-0.204718	0.0638452	-3.01198	0.00259547	0.0422032	2546.53	2411.31	2181.98	2119.43
Tcf12	9567.1	0.127824	0.131215	0.0424391	3.01194	0.00259581	0.0422032	9295.85	8970.04	9955.3	10047.2
6030458C11Rik	2519.05	0.176236	0.185592	0.0585263	3.01122	0.00260199	0.0422602	2343.62	2370.91	2653.65	2708
Poli	478.399	0.340712	0.444643	0.113174	3.01051	0.00260812	0.0423164	394.144	416.473	510.633	592.345
Vps18	1449.86	-0.220882	-0.240682	0.0734939	-3.00544	0.00265193	0.042983	1607.39	1534.12	1317.6	1340.32
Gprasp1	5310.07	0.159073	0.165846	0.0529447	3.00451	0.00266008	0.0430709	4831.72	5177.54	5593.38	5637.65
Fat4	747.584	0.341636	0.4479	0.113748	3.00346	0.00266933	0.0431765	659.74	604.992	971.024	754.58
Cul9	241.228	0.391672	0.643297	0.130467	3.00208	0.0026814	0.0433274	202.915	174.092	262.494	325.413
Pidd1	926.34	0.285538	0.335347	0.0951245	3.00173	0.00268448	0.0433328	773.415	864.687	985.379	1081.88
Mdh2	9059.5	-0.132651	-0.136486	0.0442031	-3.00094	0.00269144	0.0434008	9507.26	9467.31	8825.34	8438.09
Vdr	87.3658	-0.390269	-1.03216	0.130064	-3.00059	0.00269454	0.0434065	109.425	125.038	69.725	45.2748
Zic4	15.4334	0.276437	2.34109	0.0921517	2.9998	0.00270157	0.0434755	6.3743	3.84733	30.761	20.7509
Mgarp	520.679	0.326725	0.413833	0.109002	2.99741	0.0027228	0.0437726	477.01	416.473	586.511	602.721
Slc25a40	359.277	0.38317	0.593461	0.127897	2.99592	0.00273619	0.043943	246.473	326.061	395.792	468.783
Fign	1398.93	0.221669	0.241905	0.0740593	2.99313	0.00276133	0.0442569	1266.36	1297.51	1487.81	1544.06
Palld	3986.42	0.209244	0.225903	0.0699076	2.99315	0.00276117	0.0442569	3905.32	3446.24	4160.94	4433.16
B3gnt7	651.013	-0.305767	-0.371706	0.102171	-2.9927	0.0027652	0.044274	737.294	731.954	531.141	603.664
Rap1gap2	497.813	-0.384555	-0.603905	0.128588	-2.9906	0.00278426	0.044534	580.061	620.381	475.771	315.037
Zfp367	854.077	0.268263	0.308106	0.0897403	2.98933	0.0027959	0.044675	787.226	739.648	932.06	957.373
Ldhb	901.831	-0.268613	-0.308703	0.089912	-2.9875	0.00281266	0.0448974	1023.07	973.374	775.178	835.697
Tab3	2111.09	-0.188339	-0.200161	0.0630554	-2.98689	0.00281833	0.0449426	2249.06	2265.11	1998.44	1931.72
Cd151	2663.04	-0.193236	-0.206106	0.0647174	-2.98584	0.00282802	0.0450517	2928.99	2776.81	2556.24	2390.13
Srf	4178.38	-0.171363	-0.180076	0.0573996	-2.98544	0.00283169	0.0450647	4451.38	4427.31	3761.05	4073.79
Hmga1	8417.07	-0.149063	-0.154666	0.0499824	-2.9823	0.00286089	0.0454835	9098.25	8639.17	7768.19	8162.67
Mafk	544.788	-0.3093	-0.379281	0.103741	-2.98146	0.00286878	0.0454939	595.997	635.771	475.771	471.612
Slc3a2	4542.81	-0.173025	-0.182041	0.0580366	-2.98131	0.00287018	0.0454939	4661.74	4994.79	4371.14	4143.59
Utp14b	1892.62	-0.248968	-0.279561	0.0835	-2.98165	0.00286697	0.0454939	1995.15	2154.5	1833.36	1587.45
Foxd4	437.299	-0.386841	-0.623818	0.129785	-2.98063	0.00287657	0.0455124	553.501	507.847	273.773	414.076
Gltscr1l	550.99	0.326939	0.415964	0.10969	2.98057	0.00287711	0.0455124	441.951	502.076	597.79	662.144
Lrp10	1585.24	-0.208969	-0.225728	0.0701241	-2.97999	0.00288256	0.0455531	1699.81	1717.83	1486.78	1436.53
Fez1	456.651	0.346504	0.46468	0.116432	2.97603	0.00292004	0.0460993	394.144	373.191	577.282	481.988
Rbbp7	17199.9	-0.172321	-0.181256	0.057909	-2.97571	0.0029231	0.0461016	18966.7	17590.9	16877.6	15364.2
Atp5f1	6372.91	-0.151646	-0.157599	0.0509948	-2.97376	0.00294176	0.0463495	6821.56	6619.33	6206.55	5844.22
Lrrc56	352.478	0.345192	0.461771	0.116149	2.97199	0.00295879	0.0465715	301.717	291.435	411.173	405.587
Zc3h4	6071.77	0.171249	0.180033	0.0576278	2.97164	0.00296213	0.0465777	5795.3	5593.05	6159.39	6739.34
Lrp8os2	343.745	-0.354671	-0.489421	0.119435	-2.96958	0.00298211	0.0468452	418.579	384.733	271.723	299.945
Casp2	1948.22	0.19224	0.205068	0.0647721	2.96795	0.00299797	0.0470475	1838.98	1781.31	2092.78	2079.81
Akr1c19	79.599	-0.388378	-0.989819	0.130905	-2.96686	0.00300858	0.0471673	112.613	99.0687	60.4967	46.218
Phf10	3837.12	0.154219	0.160531	0.0519904	2.9663	0.0030141	0.047207	3603.6	3644.38	3980.48	4120.01
Pvr	946.823	-0.251945	-0.284305	0.0849509	-2.96577	0.00301928	0.0472354	1028.39	1051.28	840.802	866.824
Sptb	965.085	-0.329637	-0.423737	0.111157	-2.9655	0.0030219	0.0472354	1010.33	1200.37	917.704	731.942
Lamtor1	2080.9	-0.18656	-0.19823	0.0629603	-2.96313	0.00304523	0.0475532	2231	2216.06	1964.61	1911.92
Cdk10	733.412	0.278594	0.325682	0.0940612	2.96184	0.00305802	0.0475912	635.305	666.549	800.812	830.981
Ddx39	7954.29	-0.131201	-0.135011	0.0442996	-2.96167	0.00305971	0.0475912	8189.91	8462.19	7498.52	7666.53
Dis3	4907.47	-0.139861	-0.144515	0.0472234	-2.96169	0.00305956	0.0475912	5135.56	5170.81	4612.11	4711.41
Tmem106a	115.197	-0.391687	-0.931654	0.132215	-2.9625	0.00305156	0.0475912	152.983	149.084	97.41	61.3096
Adnp2	2695.26	0.193028	0.206101	0.0651888	2.96107	0.00306577	0.0475917	2606.02	2400.73	2941.78	2832.5
Ubox5	952.496	0.250317	0.282065	0.0845306	2.96125	0.0030639	0.0475917	872.216	847.374	1038.7	1051.7
Aadac	48.8332	-0.319509	-1.65864	0.107969	-2.95927	0.00308366	0.0477756	71.1796	76.9465	35.8879	11.3187
Btbd10	806.15	-0.265312	-0.304599	0.0896489	-2.95946	0.00308179	0.0477756	891.339	890.656	711.605	730.999
Mrpl12	3123.26	-0.162735	-0.17027	0.0550095	-2.95831	0.00309327	0.0478775	3359.25	3255.8	2953.06	2924.94
Aff3	1471.44	0.270162	0.312249	0.0913502	2.95744	0.00310209	0.0479671	1201.55	1423.51	1565.74	1694.97
Ddx46	9787.03	-0.141272	-0.146094	0.0477885	-2.95619	0.00311466	0.0481144	10427.3	10138.7	9015.04	9567.13
Apoe	18231.5	-0.391512	-0.912465	0.132495	-2.95493	0.00312741	0.0482171	22629.8	24994.2	15269.8	10032.1
Atp8a2	182.996	-0.391315	-0.688308	0.132424	-2.95503	0.00312643	0.0482171	227.35	224.107	157.907	122.619
Ciapin1	3596.01	-0.15131	-0.157305	0.0512186	-2.9542	0.00313483	0.0482844	3776.77	3806.93	3386.79	3413.53
Esf1	3773.99	-0.150082	-0.155928	0.0508099	-2.9538	0.00313891	0.0483001	4006.25	3949.28	3593.92	3546.53
Krt8	6590.05	-0.359294	-0.50812	0.12171	-2.95206	0.00315662	0.0485254	7847.82	7629.25	6089.66	4793.47
Gnb4	1672.83	-0.252757	-0.285949	0.0856694	-2.95038	0.00317381	0.0487423	1874.04	1801.51	1628.28	1387.48
Eif2b4	1839.5	-0.198727	-0.213241	0.0673718	-2.94971	0.00318076	0.0488015	1954.78	1995.8	1666.22	1741.19
Lclat1	815.881	0.26442	0.303585	0.0896564	2.94926	0.00318534	0.0488244	716.046	744.458	901.299	901.723
Cops5	5149.79	-0.157859	-0.164751	0.053551	-2.94782	0.00320022	0.0490025	5580.7	5306.42	4976.11	4735.93
Pip5k1c	4405.06	-0.196279	-0.210235	0.0665909	-2.94754	0.00320316	0.0490025	4544.87	4904.38	4295.27	3875.71
Abcd3	1991.17	-0.221181	-0.242072	0.0751098	-2.94478	0.00323188	0.049394	2090.77	2223.75	1917.44	1732.7
Smoc1	2690.49	-0.180088	-0.190646	0.0611819	-2.94349	0.00324534	0.0495518	2781.32	2953.78	2536.76	2490.11
Cd63	1498.88	-0.319392	-0.403254	0.108542	-2.94258	0.00325491	0.049602	1630.76	1782.27	1482.68	1099.8
Eya1	1258.76	0.22958	0.253367	0.0780146	2.94278	0.00325281	0.049602	1165.43	1132.08	1334	1403.52
Haao	36.1778	-0.295928	-1.89153	0.100622	-2.94099	0.00327164	0.049809	33.9962	79.832	20.5074	10.3755
Aasdh	690.601	0.318925	0.402574	0.108515	2.93898	0.0032929	0.0498593	557.751	631.923	722.884	849.846
Bbs1	674.021	0.304118	0.372384	0.103481	2.93889	0.00329388	0.0498593	601.309	574.213	707.504	813.06
Ddt	907.249	-0.279835	-0.328791	0.0952148	-2.93898	0.0032929	0.0498593	952.957	1066.67	838.751	770.615
Get4	2234.75	-0.179717	-0.190233	0.0611295	-2.93994	0.00328278	0.0498593	2389.3	2374.76	2063.04	2111.88
Hs6st1	2873.87	-0.221677	-0.24282	0.0754224	-2.93914	0.00329125	0.0498593	3007.61	3223.1	2456.78	2807.98
Ndufa11	1382.57	-0.22245	-0.243834	0.0756549	-2.94032	0.00327876	0.0498593	1513.9	1484.11	1303.24	1229.02
Dld	5136.76	-0.158836	-0.165917	0.0540662	-2.93781	0.00330544	0.0499865	5521.2	5342.01	5000.72	4683.11
Stil	1521.44	0.207649	0.224632	0.0707135	2.93649	0.00331953	0.0501516	1402.35	1404.27	1619.06	1660.08
Ankzf1	1256.96	0.306016	0.376265	0.10423	2.93597	0.00332506	0.0501871	1035.82	1152.27	1256.08	1583.67
Klhl22	1876.8	0.217063	0.236813	0.0739471	2.93539	0.00333133	0.0502338	1755.06	1690.9	2127.64	1933.61
Pkn2	6676.86	-0.131437	-0.135347	0.0448059	-2.93347	0.00335198	0.0504009	7046.78	6933.84	6274.23	6452.6
Prrx1	1136.87	0.276572	0.323596	0.0942652	2.93397	0.00334653	0.0504009	1011.39	1008.96	1156.62	1370.51
Ptpn21	728.376	-0.312333	-0.389211	0.106465	-2.93368	0.00334972	0.0504009	845.657	806.015	692.123	569.708
Dcaf7	6305.27	0.137919	0.142468	0.0470315	2.93247	0.00336273	0.0505145	5867.54	6120.13	6569.53	6663.88
Tceal8	7592.23	-0.130638	-0.134481	0.0445639	-2.93148	0.00337348	0.0506278	8063.49	7828.35	7329.33	7147.76
Otud6b	3409.54	-0.169477	-0.178242	0.0578363	-2.93029	0.00338644	0.0507741	3732.15	3508.76	3159.16	3238.09
Cox10	1197.67	-0.230516	-0.254922	0.0787042	-2.92889	0.0034017	0.050794	1290.8	1315.79	1066.38	1117.72
Hectd1	8460.56	-0.122079	-0.125195	0.041675	-2.92931	0.00339719	0.050794	8808.22	8845.97	8188.59	7999.49
Hoxb6	138.596	-0.389676	-0.710461	0.133067	-2.92841	0.00340696	0.050794	169.981	174.092	105.613	104.698
Klf9	300.978	-0.385551	-0.656876	0.131659	-2.92841	0.00340705	0.050794	309.153	427.053	257.367	210.339
Pou3f3	104.133	0.391168	0.83094	0.13357	2.92856	0.00340532	0.050794	80.7411	69.2519	136.374	130.165
Zfp941	149.308	0.390515	0.725748	0.133312	2.92933	0.00339694	0.050794	124.299	100.992	180.465	191.475
Tgfbr3	1703.24	-0.312686	-0.390424	0.1068	-2.92776	0.00341412	0.0508514	1859.17	2004.46	1693.91	1255.43
Mcl1	8405.72	-0.166664	-0.174992	0.0569464	-2.92668	0.00342599	0.0509323	8807.15	9021.02	8294.2	7500.52
Stxbp1	730.925	0.290113	0.34718	0.0991179	2.92695	0.00342304	0.0509323	665.052	622.305	775.178	861.164
Man2a2	2050.01	0.229582	0.253714	0.0784786	2.92541	0.00344004	0.0510931	1843.23	1897.69	2078.42	2380.7
Abhd2	1889.65	-0.244748	-0.275044	0.0837403	-2.9227	0.00347008	0.0514425	1976.03	2161.24	1828.23	1593.11
Wdr78	201.069	0.382744	0.637398	0.130953	2.92277	0.00346935	0.0514425	141.297	173.13	251.215	238.636
Whsc1	16690.7	0.134568	0.138815	0.0460649	2.92127	0.0034861	0.0516315	16344.8	15432.6	17841.4	17144.1
Eps15	2632.57	-0.189118	-0.201734	0.0647612	-2.92023	0.00349768	0.0516899	2874.81	2757.57	2539.84	2358.06
Fgfr4	370.85	-0.374068	-0.581797	0.128104	-2.92004	0.00349986	0.0516899	427.078	461.679	346.574	248.068
Itm2b	2405	-0.250155	-0.282985	0.085653	-2.92057	0.00349396	0.0516899	2608.15	2671.01	2379.88	1960.96
Clk2	2786.67	0.234231	0.260237	0.0802287	2.91954	0.00350549	0.0517248	2343.62	2727.75	2907.94	3167.35
Snord87	54.2337	0.365312	1.15258	0.125215	2.91749	0.00352862	0.0520176	28.6843	38.4733	79.9787	69.7986
Fgf17	126.314	0.390064	0.78352	0.133747	2.91643	0.00354065	0.0521222	90.3025	95.2213	176.363	143.37
Larp7	5227.52	-0.165659	-0.17389	0.0568049	-2.91628	0.00354232	0.0521222	5563.7	5521.88	4696.19	5128.31
Nedd4l	836.247	0.267926	0.310428	0.0919381	2.9142	0.00356602	0.0524221	731.982	760.809	961.795	890.404
Thbs4	2076.37	0.29331	0.353724	0.100662	2.91381	0.00357048	0.0524389	1782.68	1864.03	2015.87	2642.92
Adcy5	383.84	0.331896	0.435732	0.113923	2.91334	0.00357582	0.0524686	319.777	332.794	434.756	448.032
Arhgef25	2489.29	0.207858	0.225233	0.0713745	2.91221	0.00358877	0.0526097	2271.37	2319.94	2529.58	2836.28
Fst	2921.05	0.210191	0.228238	0.0721871	2.91175	0.00359405	0.0526383	2619.84	2761.42	2959.21	3343.73
Sipa1	1391.49	0.215282	0.234897	0.0739934	2.90947	0.00362039	0.052975	1282.3	1274.43	1534.98	1474.26
Timm50	3044.51	-0.160297	-0.167747	0.0551051	-2.90894	0.00362659	0.0530167	3181.84	3260.61	2847.45	2888.15
Fermt2	7147.22	-0.142229	-0.147331	0.0489049	-2.90828	0.00363424	0.0530601	7706.52	7317.61	6890.47	6674.26
Gm9726	9.01495	0.221384	3.44105	0.0761265	2.9081	0.00363628	0.0530601	2.12477	0.961832	11.279	21.6942
Rbpms2	1553.05	-0.223543	-0.245886	0.0768884	-2.90737	0.00364484	0.0531359	1636.07	1734.18	1365.79	1476.15
Fech	1324.53	-0.26412	-0.304708	0.0908852	-2.90608	0.00365982	0.0533052	1381.1	1545.66	1261.2	1110.18
Ino80c	1387.69	-0.228473	-0.252715	0.0787675	-2.9006	0.00372448	0.054197	1482.02	1535.08	1320.67	1212.99
Ifi27l2b	47.9489	-0.342904	-1.33033	0.118324	-2.89801	0.00375537	0.0545962	65.8677	71.1755	35.8879	18.8645
Lifr	1435.48	-0.251312	-0.285409	0.0867448	-2.89714	0.0037658	0.0546976	1590.39	1562.98	1393.48	1195.07
Agpat4	1172.84	-0.27447	-0.321827	0.0947512	-2.89675	0.00377052	0.0547159	1225.99	1379.27	1114.58	971.522
Adamts15	630.687	-0.337617	-0.453296	0.116577	-2.89607	0.00377862	0.0547831	734.106	723.297	605.993	459.35
Gna12	3646.32	-0.164608	-0.172805	0.0568586	-2.89504	0.00379111	0.0549138	3869.2	3858.87	3543.67	3313.55
P2rx4	333.173	-0.386851	-0.782584	0.133744	-2.89247	0.00382224	0.055314	403.705	438.595	316.839	173.553
Ank2	2187.07	-0.209824	-0.228113	0.0726391	-2.88858	0.00386992	0.0559527	2466.85	2253.57	1946.15	2081.7
Alpk3	693.964	0.345425	0.477511	0.119634	2.88734	0.00388517	0.0560195	497.195	662.702	744.417	871.54
Gabbr1	1016.67	0.325925	0.424306	0.112877	2.88743	0.00388407	0.0560195	738.356	997.419	1120.73	1210.16
Usp28	2851.89	0.204798	0.221667	0.070927	2.88745	0.00388376	0.0560195	2711.2	2556.55	2900.77	3239.03
Aars	8876.27	-0.122496	-0.125744	0.0424322	-2.88687	0.00389097	0.0560519	9328.78	9198	8362.9	8615.42
Esrp2	244.119	-0.375153	-0.608354	0.12999	-2.88602	0.00390141	0.0560595	281.531	307.786	217.378	169.78
Meis2	5953.15	0.135573	0.140034	0.0469766	2.88597	0.00390213	0.0560595	5748.55	5581.51	6156.31	6326.21
Stard8	3858.53	-0.382661	-0.677529	0.132588	-2.88608	0.00390072	0.0560595	4715.92	4780.3	3453.44	2484.45
Stab1	1486.92	0.319494	0.409419	0.110728	2.8854	0.00390917	0.0561096	1127.19	1426.4	1888.73	1505.39
Apoa5	86.195	-0.375839	-0.983677	0.13029	-2.88463	0.00391876	0.0561961	121.112	107.725	69.725	46.218
Pogz	4083.66	0.150062	0.156214	0.0520296	2.88417	0.0039245	0.0562275	3836.26	3889.65	4214.26	4394.48
Zcwpw1	179.95	0.380767	0.66087	0.132116	2.88206	0.0039508	0.0565529	154.046	125.038	226.606	214.112
Hoxaas3	25.954	0.300949	1.72581	0.104456	2.8811	0.00396289	0.0566747	10.6238	13.4656	29.7357	49.9909
Grb10	57783.9	0.158462	0.165805	0.0550297	2.87958	0.00398208	0.0568038	57351.7	51585	59274.5	62924.4
Snx18	3429.47	-0.157768	-0.165009	0.0547894	-2.87953	0.0039827	0.0568038	3637.6	3612.64	3307.84	3159.8
Sucla2	3413.67	-0.184825	-0.196904	0.0641829	-2.87966	0.00398102	0.0568038	3647.16	3644.38	3345.78	3017.38
Gas5	10057.6	0.195419	0.209939	0.0678735	2.87916	0.00398733	0.0568186	8628.67	10024.2	10551	11026.3
Stx1b	378.497	0.336022	0.452051	0.116795	2.87701	0.00401457	0.0571552	325.089	314.519	412.198	462.18
Pwwp2b	453.2	-0.37278	-0.59979	0.129684	-2.87452	0.00404646	0.0575573	506.757	584.794	431.68	289.57
Ripk1	476.008	-0.327732	-0.430723	0.114059	-2.87337	0.00406124	0.0577156	528.004	564.595	438.858	372.574
Mrc1	296.633	-0.370442	-0.58709	0.129013	-2.87136	0.00408705	0.0579846	347.399	364.534	272.748	201.85
Spryd3	991.061	-0.2516	-0.286643	0.0876251	-2.87133	0.0040875	0.0579846	1042.2	1135.92	878.74	907.382
Gm11940	14.0238	0.255645	2.3563	0.0890957	2.86933	0.00411345	0.0582492	6.3743	2.88549	19.482	27.3535
Reep4	1433.12	-0.272609	-0.319996	0.0950082	-2.86932	0.00411353	0.0582492	1434.22	1747.65	1308.37	1242.23
Ankrd17	11093.3	-0.13539	-0.13989	0.0471989	-2.86851	0.00412411	0.0583467	11770.1	11492.9	10229.1	10881
Lrch3	2236.84	0.253353	0.289428	0.0883601	2.86728	0.00414019	0.0583653	1811.36	2214.14	2403.46	2518.41
Mcf2	329.735	-0.343848	-0.476785	0.119902	-2.86773	0.00413423	0.0583653	398.394	369.343	263.52	287.684
Megf6	1951.88	0.192849	0.206874	0.0672399	2.86808	0.00412972	0.0583653	1867.67	1757.27	2099.95	2082.64
Vat1	2473.19	-0.272961	-0.320685	0.0951939	-2.86742	0.00413837	0.0583653	2669.77	2822.98	2471.14	1928.89
Fcgrt	123.87	-0.361082	-1.10741	0.125952	-2.86683	0.00414611	0.0583966	137.047	201.023	104.588	52.8206
Wdr86	1811.37	0.20599	0.223524	0.0719174	2.86427	0.00417977	0.0588183	1709.37	1634.15	1881.55	2020.39
Sec14l2	1359.77	-0.367564	-1.03339	0.128382	-2.86304	0.00419595	0.0589935	1693.44	1960.21	1105.35	680.065
Dohh	2014.73	-0.190678	-0.204245	0.0666135	-2.86246	0.00420367	0.0590495	2091.83	2221.83	1868.22	1877.02
Chd2	3657.42	0.175633	0.186007	0.0613873	2.86107	0.00422216	0.0592565	3328.45	3515.49	3748.75	4037
Stxbp2	2161.4	-0.216927	-0.237898	0.0758328	-2.8606	0.00422846	0.0592923	2295.81	2381.5	2109.18	1859.1
Ahi1	1005.74	0.259034	0.298559	0.0906366	2.85794	0.00426396	0.059737	959.332	845.45	1103.3	1114.89
Trim2	2296.38	-0.194835	-0.209477	0.0681999	-2.85682	0.00427907	0.0598883	2450.92	2473.83	2228.12	2032.65
Wbp5	11628	-0.117356	-0.120263	0.0410825	-2.85658	0.00428234	0.0598883	12115.4	12108.5	11347.7	10940.5
Pax7	528.103	0.331391	0.44306	0.116097	2.85445	0.00431119	0.0602385	492.946	403.007	573.181	643.279
Tnks2	21483.7	-0.0994778	-0.101227	0.0348595	-2.85368	0.00432165	0.0603312	22327	22148.1	20548.4	20911.3
Mir351	10.6747	-0.225773	-2.95551	0.0791513	-2.85243	0.0043387	0.0604625	24.4348	13.4656	1.02537	3.7729
Prkdc	1806.86	0.190515	0.204155	0.0667882	2.85253	0.00433732	0.0604625	1681.75	1676.47	1967.68	1901.54
Bhmt2	90.695	-0.31709	-1.4937	0.111192	-2.85174	0.0043481	0.06054	101.989	165.435	71.7758	23.5806
Srpk3	34.9968	0.331557	1.3603	0.116389	2.8487	0.00438987	0.0610679	18.0605	21.1603	45.1162	55.6503
Slc35c1	709.095	-0.274631	-0.32457	0.0964998	-2.84592	0.00442831	0.0615485	774.477	802.168	654.185	605.55
Bzw1	20022.1	-0.14773	-0.153761	0.0519245	-2.8451	0.00443973	0.0615988	22008.3	20168.6	19362	18549.5
Crb3	342.205	-0.337507	-0.461918	0.118616	-2.84537	0.00443593	0.0615988	388.832	403.969	302.484	273.535
Apoc3	72.5067	-0.348933	-1.18806	0.122681	-2.84422	0.00445198	0.0617146	94.5521	106.763	59.4713	29.24
Erich4	40.1192	-0.335979	-1.30587	0.118206	-2.84231	0.00447877	0.0620315	47.8072	66.3664	24.6088	21.6942
Apoc1	160.949	-0.359376	-1.08162	0.126499	-2.84094	0.00449809	0.0622445	215.664	221.221	145.602	61.3096
Col2a1	10907.6	0.300437	0.372769	0.105776	2.84032	0.0045069	0.0623119	9207.67	9804.91	11251.4	13366.4
Ptchd2	80.1406	0.375054	0.897805	0.132113	2.83888	0.00452719	0.0625377	54.1815	57.7099	108.689	99.9818
Champ1	3803.11	0.148362	0.154509	0.0522818	2.83773	0.00454352	0.0627085	3647.16	3553.01	3950.74	4061.53
Gtf2ird1	2616.68	0.166495	0.175388	0.0586845	2.83712	0.00455221	0.0627736	2472.16	2444.01	2727.48	2823.07
Hic2	1604.95	-0.221584	-0.244625	0.078127	-2.8362	0.00456535	0.0628254	1703	1777.46	1545.23	1394.09
Ppp3r1	3585.64	-0.145674	-0.151483	0.0513676	-2.83591	0.00456953	0.0628254	3789.52	3757.88	3416.53	3378.63
Six5	766.633	0.275367	0.326343	0.0971056	2.83575	0.00457187	0.0628254	668.239	692.519	805.939	899.836
Trit1	787.393	0.257563	0.297073	0.090819	2.83601	0.00456812	0.0628254	702.235	710.794	883.867	852.675
C1galt1	2104.97	-0.18464	-0.197117	0.0651276	-2.83505	0.00458179	0.0629071	2305.37	2192.01	1985.11	1937.38
Tmf1	1597.9	-0.199422	-0.215546	0.0703689	-2.83395	0.00459771	0.0630709	1746.56	1688.01	1460.12	1496.9
Foxred2	549.151	0.324884	0.429181	0.11469	2.83271	0.00461547	0.0632448	507.819	428.977	584.46	675.349
Gmfb	8624.72	-0.167312	-0.176381	0.0590713	-2.83238	0.00462028	0.0632448	9532.76	8769.98	8406.99	7789.15
Nup107	6129.06	-0.125412	-0.129051	0.0442803	-2.83223	0.00462239	0.0632448	6347.74	6457.74	5871.26	5839.5
Atp1b1	2035.52	-0.37253	-0.63211	0.13156	-2.83164	0.00463099	0.0632528	2356.36	2592.14	1834.38	1359.19
Inpp5f	2094.52	-0.21447	-0.235141	0.0757372	-2.83176	0.00462929	0.0632528	2283.06	2245.88	2046.63	1802.5
Cck	47.3937	0.335317	1.29556	0.11845	2.83087	0.00464221	0.0633129	32.9339	22.1221	54.3445	80.1741
Sltm	6117.15	-0.143315	-0.148852	0.0506272	-2.83078	0.0046434	0.0633129	6394.48	6471.2	5620.04	5982.87
Ascc3	3140.71	-0.177357	-0.188348	0.0627001	-2.82865	0.00467447	0.0635333	3426.18	3264.46	3045.34	2826.84
Dock6	1721.52	0.215801	0.236963	0.0762876	2.82878	0.0046726	0.0635333	1562.77	1598.56	1765.68	1959.08
Nudcd3	3950.04	-0.140736	-0.145974	0.0497551	-2.82857	0.00467564	0.0635333	4163.48	4135.88	3771.3	3729.51
Stx7	2573.38	-0.377893	-0.722413	0.133589	-2.82877	0.00467272	0.0635333	3079.85	3328.9	2279.39	1605.37
Eci1	263.169	-0.35343	-0.521814	0.124993	-2.82759	0.00469005	0.0636743	303.841	316.443	228.657	203.737
Myo7a	1934.61	-0.216805	-0.238355	0.0767054	-2.82647	0.00470642	0.0638417	2013.22	2173.74	1863.09	1688.37
Slc38a7	1295.15	-0.255692	-0.294489	0.0904727	-2.82618	0.00471069	0.0638448	1316.29	1537.01	1135.08	1192.24
Pdxdc1	3632.17	-0.177164	-0.188144	0.0626996	-2.8256	0.00471915	0.0639046	3941.44	3795.39	3551.88	3239.98
Mboat2	1513.68	0.214677	0.235565	0.0760293	2.82361	0.00474855	0.0642477	1451.21	1330.21	1640.59	1632.72
Sox13	4189.98	0.144657	0.150397	0.0512524	2.82245	0.00476584	0.0644265	3894.7	4048.35	4375.25	4441.65
Dpysl3	3429.35	0.202125	0.219173	0.0716371	2.82151	0.00477979	0.0645598	3382.63	2957.63	3605.19	3771.96
Myh6	10141.8	0.377077	0.781082	0.133682	2.8207	0.00479194	0.0646687	6708.95	8214.04	10733.6	14910.5
Rnf152	151.03	0.376735	0.788729	0.133644	2.81893	0.00481833	0.064914	128.548	93.2977	168.16	214.112
Tmem132c	2091.43	0.199945	0.216418	0.0709251	2.8191	0.00481584	0.064914	2020.65	1849.6	2296.82	2198.66
Ormdl3	1422.11	-0.208002	-0.226833	0.0738033	-2.81833	0.00482741	0.0649808	1500.08	1566.82	1322.72	1298.82
Dnajc22	375.377	-0.37393	-0.667254	0.132729	-2.81725	0.00484375	0.0649818	399.456	521.313	349.651	231.09
Hspa14	5200.29	-0.130569	-0.134743	0.0463464	-2.81723	0.00484392	0.0649818	5392.65	5493.02	4937.15	4978.34
Mast2	3384.21	0.159701	0.1676	0.0566854	2.81733	0.00484253	0.0649818	3095.78	3278.88	3606.22	3555.96
Pik3ip1	173.323	0.372047	0.643666	0.132041	2.81766	0.00483749	0.0649818	147.671	123.114	211.226	211.282
Akap12	4223.6	-0.227295	-0.252914	0.0807012	-2.8165	0.00485501	0.0650753	5020.82	4165.69	3966.12	3741.77
Snhg4	1311.78	0.297797	0.369437	0.105754	2.81593	0.00486359	0.0651351	991.203	1297.51	1430.39	1528.02
Sirpa	1777.95	0.19861	0.214794	0.0705962	2.81333	0.00490314	0.0656091	1692.38	1599.53	1952.3	1867.59
Bex1	5179.24	-0.14619	-0.152169	0.0519737	-2.81276	0.00491178	0.0656135	5329.97	5572.85	5014.05	4800.07
Lfng	939.551	0.288487	0.351473	0.10256	2.81286	0.00491031	0.0656135	909.4	742.534	1083.81	1022.46
Tmem144	413.608	-0.322788	-0.4268	0.114802	-2.81169	0.00492819	0.0657771	456.825	491.496	372.209	333.902
Pirt	63.2724	0.363799	0.987979	0.129418	2.81105	0.00493806	0.0658533	42.4953	42.3206	87.1563	81.1173
B930095G15Rik	227.553	0.359974	0.559868	0.128095	2.81022	0.00495079	0.0659674	175.293	192.366	285.052	257.5
Atp6v0e	1674.13	-0.255984	-0.295592	0.091106	-2.80974	0.00495811	0.0660092	1878.29	1811.13	1649.82	1357.3
Bnip3	1117.49	0.298542	0.371631	0.106302	2.80844	0.00497815	0.0662203	1078.32	871.419	1164.82	1355.41
Cdkl2	107.847	-0.369726	-0.899927	0.131791	-2.80539	0.00502552	0.0667381	150.858	129.847	91.2578	59.4232
Fam129a	252.418	-0.375049	-0.777112	0.133686	-2.80545	0.00502456	0.0667381	288.968	348.183	234.809	137.711
Mrpl1	1403.26	-0.205928	-0.224343	0.0734194	-2.80482	0.00503453	0.0668015	1526.64	1497.57	1314.52	1274.3
Ubr3	4185.84	-0.140072	-0.145336	0.0499796	-2.80258	0.00506957	0.0672101	4334.52	4458.09	3959.97	3990.78
Prkci	6443.68	-0.134945	-0.139632	0.0481775	-2.80099	0.00509465	0.0674859	6842.81	6667.42	6272.18	5992.31
Dnajc13	5961.33	-0.161629	-0.169951	0.0577235	-2.80006	0.00510926	0.0676228	6049.21	6573.16	5751.29	5471.65
Pklr	186.446	-0.365296	-0.945029	0.130499	-2.79921	0.00512272	0.0677442	253.909	236.611	172.262	83.0038
Ankrd6	1477.6	0.233465	0.262134	0.0834719	2.79693	0.00515904	0.0681675	1434.22	1254.23	1588.3	1633.67
Kif3b	2005.9	-0.176697	-0.187838	0.0631851	-2.7965	0.00516596	0.0682019	2124.77	2147.77	1870.27	1880.79
Fam184a	321.412	0.337479	0.47207	0.120717	2.79563	0.00517982	0.0682847	264.533	274.122	352.727	394.268
St6galnac6	569.577	0.28871	0.353119	0.103274	2.79557	0.00518087	0.0682847	513.131	487.649	617.272	660.257
Tsc22d2	2135.62	-0.172751	-0.183118	0.0618177	-2.79452	0.00519765	0.0684487	2255.44	2286.27	2008.7	1992.09
Nufip2	3402.26	-0.16673	-0.175973	0.0596755	-2.79395	0.00520681	0.0685123	3469.74	3748.26	3199.15	3191.87
Pofut2	2717.56	-0.167298	-0.176653	0.0599003	-2.79295	0.00522301	0.0686007	2871.62	2895.11	2621.87	2481.62
Slc5a11	61.7122	-0.325695	-1.32041	0.116609	-2.79306	0.00522113	0.0686007	71.1796	104.84	48.1923	22.6374
Snx27	6114.2	-0.142328	-0.147907	0.0509636	-2.79273	0.00522655	0.0686007	6292.49	6560.65	5947.13	5656.52
Hrc	333.359	0.346181	0.504073	0.124015	2.79144	0.00524738	0.0688169	280.469	271.237	350.676	431.054
Sipa1l2	2979.92	-0.198347	-0.214794	0.0711215	-2.78885	0.00528953	0.0693122	3307.2	3095.17	2913.07	2604.24
Akap1	2098.63	-0.172995	-0.183465	0.0620505	-2.78798	0.00530379	0.0694386	2224.63	2239.14	1958.45	1972.28
Bex2	2724.56	-0.167147	-0.176512	0.0599581	-2.78772	0.00530797	0.0694386	2862.06	2919.16	2625.97	2491.06
Rab26os	318.898	-0.331067	-0.454067	0.118834	-2.78595	0.00533703	0.069761	372.896	364.534	265.57	272.592
Tnpo1	21708.3	-0.163859	-0.172659	0.0588272	-2.78544	0.00534559	0.0698152	24459.2	21553.7	20573	20247.3
Pgap1	2055.71	-0.198854	-0.215503	0.0714146	-2.78449	0.00536114	0.0699604	2317.06	2101.6	1909.24	1894.94
Pepd	2108.25	-0.251405	-0.289365	0.0903024	-2.78404	0.0053687	0.0700013	2140.7	2495.95	2035.36	1761
Uqcrc2	6526.65	-0.146952	-0.153176	0.0528129	-2.7825	0.0053942	0.0702758	6868.3	6876.13	6419.83	5942.32
Minpp1	3232.68	-0.161697	-0.170151	0.0581217	-2.78205	0.0054017	0.0703155	3414.5	3430.85	3139.68	2945.69
Abcf3	2162.72	-0.173677	-0.18434	0.0624479	-2.78115	0.00541674	0.0704533	2262.88	2338.21	2019.98	2029.82
Me1	528.387	-0.338204	-0.477942	0.121626	-2.78068	0.00542446	0.0704957	593.872	635.771	507.557	376.347
Mrpl16	1201.97	-0.219372	-0.242745	0.0789062	-2.78017	0.00543311	0.0705501	1268.49	1336.95	1095.09	1107.35
Ppp1r14b	2056.86	-0.195431	-0.211224	0.0703554	-2.77777	0.00547342	0.0710151	2261.81	2153.54	1831.31	1980.77
Pot1a	1658.19	0.19471	0.210319	0.0701113	2.77716	0.00548363	0.071076	1572.33	1503.34	1756.46	1800.62
Vps50	2116.71	-0.191713	-0.206535	0.069037	-2.77695	0.00548711	0.071076	2224.63	2310.32	2043.56	1888.34
C130021I20Rik	554.002	0.285128	0.347653	0.102715	2.77592	0.00550456	0.0712437	473.823	501.114	621.373	619.699
Tmem30a	4439.7	-0.136223	-0.141147	0.0490847	-2.77526	0.0055158	0.0713308	4719.1	4594.67	4242.97	4202.07
Aimp1	3455.44	-0.154205	-0.161511	0.0555896	-2.77398	0.00553747	0.0715524	3719.4	3578.01	3321.17	3203.19
Id1	3138.18	-0.182958	-0.19569	0.0659786	-2.77299	0.00555437	0.0716701	3188.21	3512.61	2862.83	2989.08
Tuft1	474.346	-0.34944	-0.523917	0.126019	-2.77292	0.00555565	0.0716701	537.566	580.946	456.289	322.583
Mn1	1969.63	0.206336	0.225407	0.0744372	2.77195	0.00557219	0.0718248	1895.29	1738.03	2045.61	2199.6
Shmt2	5295.02	0.173385	0.184072	0.0625561	2.77168	0.0055768	0.0718258	4872.09	5043.84	5323.71	5940.43
Atp5c1	6820.69	-0.129183	-0.133369	0.046639	-2.76986	0.00560811	0.0721702	7143.46	7127.17	6656.69	6355.45
Arhgef3	437.97	-0.369182	-0.686673	0.13334	-2.76872	0.00562768	0.0723631	506.757	573.252	427.578	244.295
Klhl21	2433.3	-0.191824	-0.206789	0.0693127	-2.76751	0.00564856	0.0725725	2517.85	2696.98	2170.7	2347.69
Gigyf2	5446.37	-0.144578	-0.15056	0.0522487	-2.76711	0.00565555	0.0725829	5649.75	5809.46	5319.61	5006.64
Tbkbp1	888.746	0.251532	0.290221	0.0909063	2.76694	0.00565856	0.0725829	837.158	762.732	962.821	992.273
Lmx1b	920.846	0.258127	0.30079	0.093318	2.7661	0.0056731	0.0727105	826.534	824.29	952.567	1079.99
Fam81a	43.2047	0.315592	1.37571	0.11413	2.7652	0.00568884	0.0728531	31.8715	16.3511	71.7758	52.8206
D8Ertd738e	2828.79	-0.164131	-0.173131	0.0593802	-2.76406	0.00570864	0.0730474	2996.98	2998.99	2735.68	2583.49
1810032O08Rik	545.425	0.340488	0.490457	0.123217	2.76332	0.00572174	0.0730967	383.52	523.236	596.764	678.179
Rffl	914.789	-0.241503	-0.274904	0.0873905	-2.76349	0.00571862	0.0730967	972.08	1031.08	820.294	835.697
Map4k2	991.237	0.267277	0.316201	0.0967342	2.76301	0.00572715	0.0731067	806.349	958.946	1107.4	1092.25
Proz	104.686	-0.366716	-0.840736	0.132764	-2.76216	0.005742	0.0732372	123.236	145.237	86.1309	64.1393
Atp6v0d1	2433.03	-0.212059	-0.233194	0.0767908	-2.76152	0.00575324	0.0732623	2517.85	2739.3	2370.65	2104.33
Glce	1920.89	-0.197044	-0.213505	0.0713507	-2.76163	0.00575135	0.0732623	2126.89	1999.65	1720.57	1836.46
Sox11	9694.69	0.149562	0.156263	0.0541917	2.75988	0.00578229	0.0735729	9348.97	8993.13	9782.01	10654.7
Slc39a8	3185.99	-0.369045	-0.729129	0.133733	-2.75958	0.00578758	0.0735809	3819.27	4129.14	2827.97	1967.57
Actr3	5372.43	-0.145757	-0.151945	0.0528682	-2.75699	0.00583361	0.074047	5681.62	5627.68	5265.27	4915.14
Cadm3	809.132	-0.248996	-0.286601	0.0903062	-2.75725	0.00582905	0.074047	897.713	881.038	712.631	745.148
Anp32b	16756.3	0.128246	0.132395	0.0466023	2.75193	0.00592451	0.0750988	16463.7	15514.3	17162.6	17884.5
Evc2	1800.1	0.203747	0.222333	0.0740401	2.75185	0.00592598	0.0750988	1630.76	1692.82	1850.79	2026.05
Cidec	47.6369	-0.274324	-1.77684	0.0996992	-2.75152	0.00593202	0.0751132	52.0568	95.2213	33.8371	9.43225
Tpi1	27219.4	0.167887	0.177672	0.0610217	2.75126	0.00593662	0.0751132	27321.3	23771.7	28658	29126.8
Spon1	2742.09	0.211181	0.232234	0.0767917	2.75005	0.00595854	0.0753302	2712.26	2332.44	3016.63	2907.02
Cdc42se1	3807.77	-0.140347	-0.145871	0.0510579	-2.74879	0.0059816	0.0753667	3954.19	4045.46	3634.93	3596.52
Klf6	2798.52	-0.237405	-0.269232	0.0863591	-2.74904	0.00597698	0.0753667	2907.74	3208.67	2770.54	2307.13
Kpna4	8568.81	-0.152698	-0.159923	0.055555	-2.74859	0.00598527	0.0753667	9463.71	8623.78	8208.07	7979.68
Pitpna	3522.02	-0.151272	-0.15828	0.055025	-2.74916	0.00597481	0.0753667	3636.54	3792.5	3377.56	3281.48
Triobp	4112	0.197727	0.214565	0.0719362	2.74865	0.00598417	0.0753667	3765.08	3849.25	4090.19	4743.48
Fibcd1	27.851	0.302545	1.47659	0.110112	2.74762	0.00600291	0.0755287	16.9981	12.5038	45.1162	36.7858
Pmpca	5271.92	-0.140611	-0.146178	0.0511976	-2.74644	0.00602456	0.0756805	5404.34	5672.88	4921.77	5088.7
Zgrf1	1435.88	0.239421	0.27232	0.0871686	2.74664	0.00602085	0.0756805	1381.1	1221.53	1494.99	1645.93
Accs	296.229	0.336028	0.479294	0.122389	2.74557	0.00604065	0.0758223	262.409	232.763	344.524	345.22
Clcc1	1049.36	0.2262	0.25308	0.0824072	2.7449	0.00605293	0.0759162	980.579	934.9	1134.06	1147.9
Thnsl2	320.082	-0.364965	-0.66144	0.132993	-2.74424	0.00606506	0.0760081	345.274	438.595	298.382	198.077
Bst2	277.326	-0.357905	-0.587469	0.130463	-2.74335	0.00608163	0.0761554	304.904	360.687	252.241	191.475
Snord100	78.6572	0.353699	0.974343	0.128987	2.74213	0.00610425	0.076378	41.4329	64.4427	109.714	99.0386
Scfd1	2198.43	-0.191225	-0.206376	0.0697591	-2.74122	0.00612111	0.0765284	2402.05	2308.4	2131.74	1951.53
Prss41	95.7044	0.365557	0.790487	0.13343	2.73969	0.00614972	0.076804	69.0549	71.1755	119.968	122.619
Slc35f2	952.532	-0.247464	-0.284876	0.0903311	-2.73952	0.00615287	0.076804	1082.57	1009.92	895.146	822.492
Ankrd13b	1493.24	0.231871	0.261394	0.0846731	2.73842	0.00617345	0.0768524	1269.55	1446.59	1575.99	1680.83
F2	172.438	-0.350912	-0.995804	0.128152	-2.73826	0.0061766	0.0768524	226.288	232.763	159.957	70.7419
Fam169a	3120.97	0.187323	0.201508	0.0684261	2.7376	0.006189	0.0768524	2983.17	2824.9	3163.26	3512.57
Lgmn	7100.49	-0.340894	-1.08986	0.124527	-2.7375	0.00619079	0.0768524	8629.74	10693.6	5675.41	3403.16
Lpgat1	2623.14	-0.225779	-0.252637	0.082445	-2.73854	0.00617129	0.0768524	2759.01	2944.17	2598.28	2191.11
Rrs1	3905.84	-0.159787	-0.168214	0.0583516	-2.73834	0.00617497	0.0768524	4259.09	4008.91	3580.59	3774.79
Zfp358	1400.22	0.216094	0.239134	0.0789261	2.73793	0.0061827	0.0768524	1295.04	1274.43	1446.79	1584.62
Psmd13	6286.77	-0.154192	-0.161718	0.0563425	-2.73669	0.00620602	0.076981	6755.69	6521.22	6189.12	5681.04
Ccdc57	290.559	0.331692	0.466612	0.121214	2.73642	0.00621117	0.0769844	247.535	240.458	339.397	334.845
Gnai3	12269.5	-0.124542	-0.128375	0.0455287	-2.73545	0.00622947	0.0771507	13125.7	12504.8	11939.4	11508.3
Kalrn	1612.88	-0.224479	-0.250882	0.0820762	-2.73501	0.00623786	0.0771941	1713.62	1790.93	1569.84	1377.11
Ccdc93	1982.81	-0.179109	-0.191374	0.0655118	-2.734	0.00625698	0.0773702	2067.4	2160.27	1866.17	1837.4
Fam107b	2602.47	-0.235612	-0.26706	0.0862074	-2.73308	0.00627447	0.0774652	2983.17	2701.78	2570.6	2154.33
Rit1	734.859	-0.272111	-0.32636	0.0995614	-2.73309	0.00627423	0.0774652	820.159	814.671	696.225	608.38
2500002B13Rik	171.74	0.365487	0.727346	0.133742	2.73277	0.00628045	0.0774785	122.174	136.58	176.363	251.841
Bgn	611.833	0.305399	0.394362	0.111771	2.73237	0.00628801	0.0775113	517.38	539.588	765.95	624.415
Cstb	1288.13	-0.308212	-0.401244	0.112867	-2.73075	0.00631897	0.0777172	1347.1	1584.14	1271.46	949.827
Egfl7	1569.52	0.255143	0.297453	0.0934379	2.73062	0.00632157	0.0777172	1289.73	1526.43	1628.28	1833.63
Fancg	662.544	0.268203	0.319584	0.0982351	2.73021	0.00632931	0.0777172	610.87	568.442	722.884	747.977
Rimbp3	83.5317	0.359514	0.881929	0.131652	2.73079	0.00631826	0.0777172	64.8053	52.9007	99.4607	116.96
Slc6a6	6739.48	-0.136177	-0.141273	0.0498749	-2.73038	0.00632615	0.0777172	7276.26	6863.63	6329.6	6488.44
Zfp783	307.171	0.349203	0.541284	0.12793	2.72964	0.00634039	0.0777928	271.97	228.916	325.042	402.757
Strip2	107.897	-0.362868	-0.819187	0.132969	-2.72897	0.00635323	0.0778899	133.86	141.389	91.2578	65.0825
Dhx34	1176.85	0.239825	0.273508	0.0878966	2.72849	0.00636242	0.0779421	1082.57	1049.36	1206.86	1368.62
Col4a3bp	2479.33	-0.219373	-0.243895	0.080441	-2.72713	0.00638884	0.0782052	2497.66	2877.8	2369.63	2172.25
Amn	1711.52	-0.325472	-1.20713	0.119536	-2.72279	0.00647339	0.0791465	2239.5	2537.31	1340.16	729.113
Kcnq3	77.5373	0.358248	0.88116	0.131605	2.72215	0.00648578	0.0791465	55.2439	53.8626	107.664	93.3793
Mtmr6	1607.68	-0.18888	-0.203653	0.0693826	-2.7223	0.00648301	0.0791465	1701.94	1739.95	1480.63	1508.22
Slc22a17	1178.71	0.313102	0.414617	0.115011	2.72236	0.0064818	0.0791465	860.53	1159.97	1230.44	1463.88
Zfp326	3052.2	0.171278	0.181977	0.0629261	2.7219	0.00649082	0.0791469	2863.12	2857.6	3103.79	3384.29
Sbds	2113.02	-0.170955	-0.181597	0.0628309	-2.72087	0.00651106	0.0793325	2210.82	2280.5	1979.99	1980.77
Gm37818	26.7363	0.29668	1.48634	0.10906	2.72034	0.00652152	0.0793987	11.6862	16.3511	43.0655	35.8425
Pdpk1	3187.93	-0.145624	-0.151982	0.0535523	-2.71929	0.00654228	0.0795902	3383.69	3327.94	3021.76	3018.32
Actr2	10360.4	-0.12993	-0.134366	0.0477916	-2.71867	0.0065544	0.0796763	11182.6	10503.2	9994.26	9761.43
Trappc10	1810.78	-0.256578	-0.300392	0.0944142	-2.71758	0.00657614	0.0798791	1785.87	2210.29	1676.48	1570.47
Cul2	4231.18	-0.159886	-0.168485	0.0588638	-2.7162	0.00660355	0.0800283	4665.99	4290.73	4033.8	3934.19
Fam98a	3604.42	-0.144773	-0.151028	0.0532997	-2.7162	0.00660361	0.0800283	3849.01	3737.68	3369.36	3461.64
Igfbp4	10349.2	-0.137325	-0.142615	0.0505509	-2.71657	0.00659624	0.0800283	11186.9	10534	10093.7	9582.22
Spats2	6183.71	0.142322	0.14825	0.0524069	2.71571	0.00661344	0.080086	6065.14	5669.04	6407.53	6593.14
Arhgef10	1106.19	0.267275	0.318875	0.0984886	2.71377	0.00665222	0.0803821	1071.94	897.389	1285.81	1169.6
H2afy	7374.05	0.167573	0.177605	0.0617501	2.71372	0.00665315	0.0803821	7338.94	6503.91	7895.33	7758.02
Mgme1	1367.41	0.225119	0.252307	0.0829425	2.71416	0.00664436	0.0803821	1237.68	1259.04	1399.63	1573.3
Sec23b	4300.13	-0.144522	-0.150763	0.05329	-2.71198	0.0066882	0.0807438	4394.02	4654.3	4072.76	4079.45
Zfp512b	2151.88	-0.187983	-0.202658	0.0693286	-2.71148	0.00669842	0.0808055	2199.13	2405.54	2010.75	1992.09
Nkx6-1	588.192	0.276185	0.335238	0.101888	2.71067	0.00671478	0.080941	502.507	537.664	642.906	669.69
Gm12940	569.121	0.28771	0.357826	0.106163	2.71008	0.00672672	0.0810232	468.511	529.007	623.424	655.541
Zfp280c	2783.44	-0.178018	-0.190285	0.0656977	-2.70965	0.00673549	0.081067	2921.55	3012.46	2481.39	2718.37
Mrps28	932.885	-0.238317	-0.271919	0.0880245	-2.70739	0.00678139	0.0815034	991.203	1049.36	868.487	822.492
Slc2a8	391.335	0.330347	0.468919	0.122018	2.70736	0.00678207	0.0815034	299.592	356.84	419.376	489.534
Mapk3	4792.63	-0.13684	-0.142111	0.0505524	-2.7069	0.00679156	0.0815152	5144.06	4914	4520.85	4591.62
Npc1l1	67.4347	-0.347814	-0.97611	0.128508	-2.70655	0.00679867	0.0815152	89.2402	89.4503	53.3191	37.729
Slc52a2	948.635	-0.230339	-0.260068	0.085112	-2.7063	0.00680368	0.0815152	1013.51	1054.17	857.208	869.653
Ubr2	3182.36	0.188642	0.203554	0.0697022	2.7064	0.00680172	0.0815152	2777.07	3138.46	3344.75	3469.18
Masp1	353.304	-0.357848	-0.624351	0.132264	-2.70556	0.00681902	0.0816371	423.891	432.824	341.448	215.055
Flrt1	206.529	0.351642	0.571005	0.130037	2.70417	0.00684751	0.0817948	180.605	151.969	250.19	243.352
Lin54	1565.69	-0.193127	-0.209296	0.0714185	-2.70416	0.00684772	0.0817948	1644.57	1713.02	1472.43	1432.76
Wscd2	143.325	-0.35367	-0.903408	0.130781	-2.70429	0.00684503	0.0817948	205.04	168.321	129.196	70.7419
Uap1l1	529.07	-0.338771	-1.05647	0.125317	-2.70331	0.00686535	0.0819434	656.553	772.351	432.705	254.671
Crkl	3960.73	-0.138999	-0.144559	0.0514446	-2.70191	0.0068943	0.0822269	4117.8	4200.32	3705.68	3819.12
Ugt1a7c	52.6018	-0.321385	-1.21692	0.118972	-2.70135	0.00690595	0.0823037	58.4311	88.4885	38.964	24.5238
BC025920	35.9971	0.308761	1.32916	0.114449	2.69781	0.00697982	0.0829339	14.8734	25.9695	51.2684	51.8774
Cacnb1	206.274	0.360055	0.676088	0.133438	2.69829	0.0069697	0.0829339	144.484	173.13	212.251	295.229
Hook3	2976.19	0.151886	0.159286	0.0562986	2.69786	0.00697865	0.0829339	2863.12	2761.42	3158.13	3122.07
Otx2	2406.8	0.238905	0.273123	0.0885455	2.6981	0.00697369	0.0829339	2355.3	2005.42	2454.73	2811.75
Susd4	428.55	0.29679	0.378546	0.110038	2.69716	0.00699338	0.0830326	375.021	370.305	484.999	483.874
Aaas	2927.84	0.153822	0.161539	0.0570497	2.69629	0.00701169	0.0830773	2753.7	2773.92	3155.06	3028.69
Aadat	219.111	-0.349335	-0.560388	0.129556	-2.6964	0.00700939	0.0830773	241.161	280.855	185.592	168.837
Ero1l	2314.44	0.196567	0.213851	0.0729043	2.69623	0.00701292	0.0830773	2244.81	2042.93	2392.18	2577.83
4933404O12Rik	332.809	0.335394	0.491184	0.12442	2.69566	0.00702483	0.0831561	299.592	253.924	418.35	359.369
Cacna1s	62.2449	-0.296257	-1.43939	0.109936	-2.69481	0.00704296	0.083246	90.3025	91.374	51.2684	16.0348
Fam131b	514.877	0.30747	0.404193	0.114089	2.69499	0.00703897	0.083246	480.197	406.855	553.699	618.755
mt-Rnr1	5920.91	0.356252	0.620646	0.132246	2.69387	0.00706288	0.083419	5406.47	3927.16	7014.54	7335.46
Rb1	619.22	0.278165	0.340279	0.103302	2.69273	0.00708696	0.0836063	578.999	514.58	677.768	705.532
Scube2	419.961	0.330229	0.472455	0.122642	2.69262	0.00708931	0.0836063	395.206	308.748	513.709	462.18
Kctd5	4275.85	-0.142224	-0.148252	0.0528281	-2.69221	0.00709811	0.0836476	4617.12	4374.41	4063.53	4048.32
Dph7	918.115	0.246294	0.284833	0.0914948	2.69189	0.00710475	0.0836634	793.6	861.801	971.024	1046.04
Cabp7	96.1159	-0.357421	-0.817075	0.132798	-2.69146	0.00711401	0.0837102	133.86	111.572	63.5728	75.458
Piga	1723.22	0.20708	0.22782	0.0769505	2.69108	0.00712219	0.083744	1568.08	1607.22	1758.51	1959.08
F10	163.834	-0.336102	-1.06154	0.124957	-2.68974	0.00715084	0.083956	175.293	267.389	146.628	66.0257
Rasal1	94.416	-0.334117	-1.08173	0.124208	-2.68998	0.00714568	0.083956	105.176	151.008	79.9787	41.5019
Colec11	89.5481	-0.346363	-0.960511	0.128789	-2.68938	0.00715841	0.0839824	98.8016	137.542	72.8011	49.0477
Gramd4	1597.04	0.214871	0.23849	0.0799053	2.68907	0.00716522	0.0839999	1458.65	1472.56	1625.21	1831.74
Fam227a	97.2135	0.35748	0.802781	0.133032	2.68717	0.00720609	0.0843421	62.6806	78.8702	119.968	127.335
Hps4	1220.86	0.210962	0.233166	0.0785171	2.68683	0.00721331	0.0843421	1094.25	1150.35	1303.24	1335.61
Stx3	1907.68	-0.358482	-0.671417	0.13342	-2.68686	0.00721269	0.0843421	2135.39	2551.74	1692.88	1250.72
Tubb4b	7565.7	-0.152961	-0.1606	0.0569323	-2.68672	0.00721575	0.0843421	7802.14	8168.84	7465.7	6826.12
Atp8a1	854.499	0.23758	0.271511	0.0884445	2.68621	0.00722681	0.0844089	771.29	777.16	954.618	914.928
Rab7	4196.37	-0.130571	-0.135198	0.048633	-2.68482	0.00725691	0.084698	4405.7	4380.18	3992.78	4006.82
Iqgap2	3383.98	-0.20203	-0.221208	0.0752659	-2.68422	0.00727001	0.0847882	3562.17	3722.29	3364.23	2887.21
Efna2	789.026	0.252413	0.295075	0.0940497	2.68383	0.0072785	0.0848246	739.418	678.091	885.918	852.675
Daam1	2210.6	-0.195641	-0.212849	0.0729105	-2.68331	0.00728979	0.0848935	2403.11	2343.02	2164.55	1931.72
H2-K1	363.159	0.321534	0.445841	0.11989	2.68191	0.00732041	0.0851874	331.463	283.74	433.731	403.7
Prr5	750.013	-0.316717	-0.431291	0.118116	-2.6814	0.00733142	0.0852527	804.224	917.587	732.113	546.127
Letmd1	855.155	0.244443	0.282352	0.0911859	2.68071	0.0073467	0.0853676	754.292	788.702	973.074	904.553
Trp63	38.6404	0.3101	1.2914	0.115715	2.67987	0.00736506	0.085518	27.622	17.313	61.5221	48.1045
Prss12	290.845	-0.357992	-0.688214	0.133621	-2.67917	0.00738057	0.0856352	354.836	362.611	279.925	166.008
Zfp61	548.974	0.296714	0.380422	0.110794	2.67806	0.00740489	0.0858543	480.197	474.183	568.054	673.463
Myo1c	3633.42	-0.1819	-0.195473	0.0679938	-2.67524	0.00746751	0.0865169	3788.46	3968.52	3586.74	3189.99
Adcyap1r1	278.831	0.340693	0.523128	0.127412	2.67394	0.00749659	0.0867901	256.034	201.985	328.118	329.185
Tdgf1	357.93	0.332337	0.485895	0.124326	2.67311	0.00751507	0.0869405	286.843	309.71	370.158	465.01
Chuk	2978.16	-0.180002	-0.193143	0.067361	-2.67221	0.00753545	0.0870477	3003.36	3350.06	2776.7	2782.51
Hpn	470.122	-0.345557	-0.551322	0.129327	-2.67196	0.00754087	0.0870477	575.811	541.511	460.39	302.775
Slc37a1	133.07	-0.357038	-0.685745	0.133611	-2.67222	0.00753513	0.0870477	163.607	164.473	111.765	92.436
Pik3cb	1073.64	-0.306701	-0.405556	0.11482	-2.67113	0.00755961	0.0871368	1203.68	1242.69	1076.64	771.558
Tdrp	376.922	-0.345815	-0.553318	0.129453	-2.67136	0.00755442	0.0871368	413.267	482.839	357.853	253.727
Fnta	3139.27	-0.145416	-0.152	0.0544524	-2.67051	0.00757361	0.0872346	3268.95	3339.48	2999.2	2949.46
Cox5a	2753.01	-0.152281	-0.159914	0.0570304	-2.67017	0.00758124	0.0872588	2868.43	2942.24	2583.93	2617.45
Anp32a	16891.9	0.131972	0.136818	0.0494401	2.66934	0.00760011	0.0874123	16640.1	15545.1	17249.8	18132.6
Sptlc2	2847.2	-0.164482	-0.174305	0.0616834	-2.66655	0.00766348	0.0880771	3026.73	3010.53	2774.65	2576.89
Slc43a2	1005.98	-0.345854	-0.921757	0.129732	-2.6659	0.00767816	0.0881816	1198.37	1435.05	850.03	540.468
Mum1	4664.13	0.216155	0.24081	0.0810944	2.66548	0.00768793	0.0882297	3881.95	4668.73	4840.76	5265.08
Mex3c	4474.13	-0.159456	-0.168357	0.0598535	-2.6641	0.00771938	0.0884836	4953.89	4516.76	4262.46	4163.39
Sh3bgrl2	1870.34	-0.225705	-0.254502	0.0847236	-2.66402	0.00772125	0.0884836	2090.77	1978.49	1842.59	1569.53
Ctsa	3675.83	-0.208001	-0.229606	0.0780956	-2.66341	0.0077352	0.0885151	3777.83	4156.07	3636.98	3132.45
Spred1	7133.73	0.158474	0.167203	0.0594984	2.66351	0.00773313	0.0885151	7072.28	6371.17	7404.18	7687.28
Cdon	4371.7	0.168774	0.17949	0.0633745	2.66313	0.0077418	0.0885265	4321.77	3880.03	4566.99	4718.01
Foxg1	237.181	0.337877	0.514491	0.126939	2.66172	0.0077742	0.0888003	207.165	183.71	275.824	282.024
Rab3ip	1906.35	-0.212811	-0.236238	0.0799559	-2.6616	0.00777698	0.0888003	1922.91	2200.67	1714.42	1787.41
Map4	7292.01	-0.120743	-0.124432	0.0453691	-2.66135	0.00778283	0.088803	7562.04	7649.45	7119.13	6837.44
Mccc2	1258.09	-0.209224	-0.231327	0.0786274	-2.66096	0.00779185	0.0888417	1360.91	1356.18	1196.6	1118.66
Ccar2	4916.21	0.128928	0.133461	0.0484563	2.66071	0.00779766	0.0888438	4703.17	4675.46	5055.06	5231.12
Ing4	66.4098	0.327558	1.09328	0.123213	2.65846	0.00784978	0.0893733	29.7467	54.8244	82.0294	99.0386
Eif2s1	7304.78	-0.137793	-0.143401	0.0518495	-2.65757	0.00787067	0.0894822	7954.06	7382.06	6989.93	6893.09
Pbld2	98.8962	-0.350081	-0.854078	0.13172	-2.65776	0.00786621	0.0894822	107.301	147.16	77.928	63.1961
Gna11	4223.89	-0.13104	-0.135826	0.0493199	-2.65694	0.00788543	0.0895855	4385.52	4459.05	4057.38	3993.61
Lancl1	1092.65	0.211925	0.235159	0.0798138	2.65525	0.00792502	0.089906	997.577	1009.92	1181.22	1181.86
Stmn1	780.311	0.256644	0.303522	0.0966478	2.65545	0.00792021	0.089906	691.611	705.023	911.552	813.06
Eldr	141.109	0.353954	0.663495	0.133412	2.65309	0.00797583	0.090093	112.613	105.801	186.617	159.405
Fbxl22	441.728	0.314229	0.429174	0.118426	2.65338	0.00796892	0.090093	366.522	386.656	456.289	557.446
Gcnt2	478.477	-0.301641	-0.395168	0.113663	-2.65381	0.00795886	0.090093	526.942	559.786	447.06	380.12
Ginm1	813.226	-0.250399	-0.293146	0.0943918	-2.65276	0.00798363	0.090093	880.715	909.893	769.026	693.27
Klhl13	2372.48	-0.211602	-0.23476	0.079757	-2.65308	0.00797604	0.090093	2505.1	2623.88	2348.09	2012.84
Map10	278.343	0.324622	0.462483	0.122304	2.65423	0.00794906	0.090093	231.599	236.611	317.864	327.299
Ocln	497.324	-0.296824	-0.383579	0.111886	-2.65291	0.00798017	0.090093	521.63	604.03	442.959	420.678
Ptk7	7379.68	0.14768	0.154699	0.0556733	2.65261	0.00798711	0.090093	7122.21	6848.24	7443.15	8105.13
B3gat1	184.355	0.350445	0.60882	0.132149	2.65189	0.0080042	0.0901571	160.42	131.771	235.835	209.396
Zdhhc1	215.165	0.342945	0.547195	0.129318	2.65195	0.00800277	0.0901571	165.732	183.71	270.697	240.522
Clic6	4843.32	-0.334297	-1.01492	0.12611	-2.65083	0.00802952	0.09034	6158.63	6801.11	4033.8	2379.76
Creld1	286.159	0.322352	0.455497	0.121609	2.65073	0.00803187	0.09034	243.286	239.496	326.067	335.788
Slc24a4	31.3592	-0.298058	-1.35179	0.112474	-2.65	0.00804908	0.0904692	37.1834	52.9007	17.4313	17.9213
Mettl17	888.136	0.270263	0.328283	0.102032	2.64881	0.00807759	0.0907251	709.672	864.687	980.252	997.932
Abracl	2067.36	-0.172807	-0.184538	0.0652585	-2.64804	0.00809603	0.0908208	2252.25	2146.81	1958.45	1911.92
Bex4	1235.54	-0.231141	-0.263037	0.0873136	-2.64726	0.0081148	0.0908208	1278.05	1416.78	1173.02	1074.33
Car4	9560.76	-0.351875	-0.633769	0.132906	-2.64755	0.00810768	0.0908208	11379.2	11875.7	8727.93	6260.18
Cer1	30.0011	-0.301235	-1.31898	0.113785	-2.64739	0.0081115	0.0908208	41.4329	44.2443	16.4059	17.9213
Thpo	48.9266	-0.330629	-1.04878	0.124895	-2.64725	0.00811485	0.0908208	62.6806	69.2519	30.761	33.0129
Fbn1	2010.12	0.230072	0.261445	0.0869233	2.64684	0.0081247	0.0908667	1683.88	1971.75	2305.03	2079.81
Mettl3	1695.76	0.21808	0.244022	0.0824535	2.64489	0.00817179	0.0913287	1438.47	1665.89	1849.76	1828.91
Ano9	170.006	-0.352644	-0.762869	0.133409	-2.64334	0.00820937	0.0914253	167.856	259.695	137.399	115.073
Atp2c2	181.284	-0.35359	-0.710818	0.133747	-2.64371	0.00820017	0.0914253	252.847	197.175	160.983	114.13
Cers5	2221.14	-0.169956	-0.181104	0.0642915	-2.64352	0.00820483	0.0914253	2299	2420.93	2111.23	2053.4
Cnnm4	430.138	0.309817	0.418257	0.11718	2.64393	0.00819499	0.0914253	398.394	338.565	468.593	515.001
Dhrs11	311.958	-0.345949	-0.57477	0.130899	-2.64286	0.00822091	0.0914253	312.341	433.786	269.672	232.033
Plppr5	121.655	0.353442	0.712737	0.133747	2.64262	0.00822672	0.0914253	100.926	83.6793	143.552	158.462
Slco4c1	593.299	-0.305363	-1.2671	0.115483	-2.64423	0.00818781	0.0914253	751.105	925.282	456.289	240.522
Zfp217	3795.7	0.181075	0.194829	0.0685195	2.64268	0.00822517	0.0914253	3552.61	3528	3789.76	4312.42
Psmb3	1420.56	-0.197153	-0.215481	0.0746139	-2.64231	0.00823415	0.0914437	1569.14	1484.11	1321.7	1307.31
Ciart	448.303	0.342898	0.553354	0.12982	2.64134	0.00825788	0.0916427	376.083	351.069	426.553	639.506
Csnk1e	4753.7	0.147159	0.154168	0.0557258	2.64078	0.00827163	0.091731	4401.45	4598.52	4846.91	5167.93
Dnaaf3	75.9272	0.341274	0.929461	0.129262	2.64018	0.00828618	0.0918279	47.8072	56.7481	84.0802	115.073
Tmem64	1854.03	-0.194225	-0.211683	0.0735728	-2.63991	0.00829283	0.0918371	2070.58	1909.24	1767.73	1668.56
D2Wsu81e	2277.01	0.171222	0.182688	0.0648744	2.63929	0.00830801	0.0918765	2167.26	2099.68	2349.12	2492
Gdf2	109.713	-0.352927	-0.725102	0.133715	-2.63938	0.00830567	0.0918765	133.86	139.466	88.1817	77.3444
Emc6	2106.14	-0.167005	-0.177579	0.0632978	-2.63839	0.00833001	0.0920553	2276.69	2194.9	1976.91	1976.06
Klhl18	931.425	-0.226729	-0.256751	0.0859529	-2.63783	0.00834378	0.092143	990.141	1037.82	846.954	850.789
Slc25a13	3683.2	-0.156986	-0.165646	0.0595366	-2.6368	0.00836914	0.0923158	4003.06	3785.77	3578.53	3365.43
Sod1	6336.82	-0.132185	-0.137186	0.0501324	-2.63672	0.0083711	0.0923158	6598.46	6676.07	6221.93	5850.82
Caprin2	880.318	0.283268	0.355104	0.107451	2.63624	0.00838304	0.092383	713.921	831.022	898.222	1078.11
Lrrc10	185.452	0.348251	0.60446	0.132135	2.63557	0.00839958	0.0925008	155.108	139.466	201.998	245.238
Usp32	1969.82	-0.177387	-0.190329	0.0673348	-2.63441	0.00842847	0.0927542	2095.02	2103.53	1898.98	1781.75
Klb	423.525	-0.298761	-1.31126	0.113432	-2.63384	0.00844257	0.0928447	520.568	686.748	318.889	167.894
Ccnd1	6135.18	0.179954	0.193542	0.0683393	2.63325	0.00845728	0.0929418	6143.76	5306.42	6481.35	6609.18
Ndnf	366.523	0.334453	0.509951	0.127025	2.63296	0.00846434	0.0929548	349.524	255.847	418.35	442.372
Reep6	1339.5	-0.32754	-1.04953	0.124423	-2.63246	0.00847682	0.0930272	1603.14	2009.27	1090.99	654.598
Hs6st2	2199.68	-0.196808	-0.215198	0.0747723	-2.63209	0.00848614	0.0930649	2463.67	2263.19	2130.71	1941.16
Tti2	785.121	0.237488	0.27331	0.0902602	2.63115	0.00850962	0.0932121	716.046	705.984	858.233	860.221
Wdr47	467.943	-0.299569	-0.393028	0.113858	-2.63108	0.00851136	0.0932121	490.821	571.328	416.299	393.325
Alg8	1819.71	0.177939	0.191066	0.0676638	2.62974	0.00854489	0.093503	1657.32	1740.92	1945.12	1935.5
Tdrkh	318.25	0.320286	0.453631	0.121803	2.62955	0.00854975	0.093503	280.469	256.809	388.614	347.107
Abcb1a	12.8428	-0.235006	-2.06983	0.089412	-2.62836	0.00857988	0.0937675	21.2477	20.1985	6.15221	3.7729
Lrp1	9443.83	0.179859	0.193493	0.0684565	2.62735	0.0086053	0.0939803	8884.71	8737.28	10860.7	9292.65
Capn6	4916.24	0.167005	0.177693	0.0635995	2.62588	0.00864258	0.0943194	4864.65	4364.79	5094.03	5341.48
Hnf1a	92.0019	-0.348103	-0.807743	0.132578	-2.62565	0.00864828	0.0943194	105.176	128.885	70.7504	63.1961
Fabp1	38.4465	-0.258468	-1.71936	0.098502	-2.62399	0.00869066	0.0947162	35.0586	82.7175	25.6342	10.3755
Eif2a	4866.64	-0.129893	-0.134679	0.0495188	-2.62312	0.00871297	0.0948939	5198.24	4989.98	4613.13	4665.19
Cpne5	328.905	0.318587	0.449522	0.121477	2.62262	0.0087257	0.0949671	299.592	256.809	387.589	371.631
Pag1	435.1	-0.336315	-0.524617	0.128273	-2.62187	0.00874492	0.0951108	445.138	580.946	403.995	310.321
Idh1	1876.77	-0.203544	-0.2244	0.0776575	-2.62104	0.00876607	0.0952753	2050.4	1993.88	1839.51	1623.29
Als2cl	166.721	-0.343445	-0.864002	0.13108	-2.62011	0.00879016	0.0954714	163.607	266.427	142.526	94.3225
Lig4	1045.06	-0.219062	-0.246077	0.0836197	-2.61975	0.00879955	0.0955077	1152.69	1115.72	928.983	982.84
Ak1	933.279	0.233302	0.2673	0.089112	2.61807	0.00884277	0.0955418	883.902	810.824	1001.78	1036.6
Ciz1	1597.74	0.210236	0.233633	0.0803044	2.61799	0.00884497	0.0955418	1398.1	1538.93	1658.02	1795.9
Jrk	783.594	0.268119	0.326312	0.102373	2.61904	0.00881786	0.0955418	748.98	642.504	833.624	909.269
Med22	3652.98	-0.136579	-0.142211	0.0521693	-2.61799	0.00884501	0.0955418	3803.33	3861.75	3520.09	3426.74
Nop56	7211.62	0.137752	0.143537	0.0526074	2.61849	0.00883198	0.0955418	6906.55	6801.11	7277.04	7861.78
Pkp2	2078.75	-0.171169	-0.182831	0.0653644	-2.61869	0.00882675	0.0955418	2263.94	2157.39	1919.49	1974.17
Rnh1	1452.5	-0.263871	-0.318415	0.100771	-2.61853	0.00883101	0.0955418	1536.21	1687.05	1441.67	1145.07
Hivep1	1803.13	0.179171	0.192758	0.0684691	2.61682	0.00887528	0.095675	1683.88	1682.24	1871.3	1975.11
Ppp1r3b	433.725	0.323147	0.46709	0.123481	2.61697	0.00887129	0.095675	348.462	379.923	436.807	569.708
Zfp946	584.47	0.276389	0.342664	0.105621	2.61681	0.0088755	0.095675	550.314	480.916	651.109	655.541
Cnr1	127.092	0.349754	0.688503	0.133719	2.61558	0.00890761	0.0958457	107.301	87.5267	157.907	155.632
Gm44686	34.8279	0.29179	1.35597	0.111562	2.61551	0.00890953	0.0958457	16.9981	22.1221	37.9386	62.2528
Tex15	301.295	-0.316797	-0.445043	0.121102	-2.61595	0.00889802	0.0958457	360.148	334.717	259.418	250.898
Adam33	36.8832	-0.297772	-1.29918	0.113878	-2.61484	0.00892696	0.0959026	49.932	54.8244	27.6849	15.0916
Lxn	553.229	-0.338781	-0.543338	0.12956	-2.61485	0.00892664	0.0959026	607.683	704.061	546.521	354.653
Gm9752	57.0217	0.304257	1.23352	0.116433	2.61316	0.0089709	0.0963092	27.622	40.3969	55.3699	104.698
Cbfa2t2	1479.36	0.202323	0.222933	0.0774719	2.61157	0.00901272	0.0966925	1429.97	1301.36	1588.3	1597.82
Cldn6	5175.32	-0.31029	-0.425527	0.118852	-2.61072	0.00903512	0.0968671	5604.07	6261.52	4857.17	3978.52
Ryk	4618.7	-0.155246	-0.163789	0.0594745	-2.61029	0.00904659	0.0969242	4958.14	4802.43	4553.66	4160.56
Dok4	1489.86	-0.18833	-0.204492	0.0721645	-2.60974	0.00906121	0.0969495	1622.26	1568.75	1366.82	1401.63
Podxl2	123.854	0.348981	0.685562	0.133714	2.60991	0.00905662	0.0969495	95.6144	94.2595	164.059	141.484
Mocos	41.5266	-0.30781	-1.19809	0.117972	-2.60917	0.00907626	0.0970447	52.0568	63.4809	30.761	19.8077
Gclm	1372.13	-0.20972	-0.233129	0.0803923	-2.6087	0.00908858	0.0971108	1425.72	1538.93	1304.27	1219.59
2700099C18Rik	582.135	0.293027	0.379953	0.112348	2.6082	0.00910204	0.0971233	465.324	546.32	614.195	702.702
Gemin7	1107.93	-0.214113	-0.239306	0.0820861	-2.6084	0.00909669	0.0971233	1211.12	1187.86	1048.95	983.783
Zc3h13	4181.62	0.14385	0.150556	0.0551856	2.60665	0.00914317	0.0974963	3879.82	4047.39	4285.01	4514.27
Ltv1	3465.72	-0.169355	-0.180744	0.0649911	-2.60583	0.00916531	0.0976665	3860.7	3504.91	3324.24	3173.01
Hook2	939.356	-0.238365	-0.275666	0.091492	-2.60531	0.00917919	0.0977485	981.642	1075.33	880.791	819.662
Timm22	1591.24	-0.179535	-0.193365	0.0689301	-2.60459	0.00919847	0.0978878	1698.75	1696.67	1486.78	1482.75
Endov	1122.51	0.213546	0.238605	0.0820012	2.60418	0.00920951	0.0979148	1058.13	1002.23	1188.4	1241.28
Nat8l	671.708	0.307591	0.418922	0.118121	2.60403	0.00921339	0.0979148	661.864	488.61	751.595	784.763
Nol8	3374.4	-0.138666	-0.144648	0.0532653	-2.6033	0.00923308	0.098058	3505.86	3580.9	3175.56	3235.26
Gm9889	11.5744	0.22271	2.23102	0.0855577	2.60304	0.00924015	0.0980672	5.31191	2.88549	16.4059	21.6942
Itga3	3438.24	-0.217134	-0.243764	0.0834364	-2.60239	0.00925775	0.0981881	3928.69	3527.04	3417.55	2879.67
D8Ertd82e	2626.87	-0.189133	-0.205653	0.0727067	-2.60131	0.00928683	0.0984304	2919.43	2709.48	2310.15	2568.4
Susd3	27.6434	-0.255505	-1.71342	0.0982501	-2.60056	0.00930729	0.0985812	29.7467	54.8244	18.4566	7.5458
Tmem106b	1745.8	-0.201097	-0.221498	0.0773481	-2.59989	0.00932532	0.098706	1831.55	1926.55	1698.01	1527.08
Ermn	188.888	-0.345516	-0.623284	0.132916	-2.59951	0.00933576	0.0987504	260.284	198.137	141.501	155.632
Lman1	6757.51	-0.131795	-0.136913	0.0507397	-2.59748	0.00939119	0.0992703	7208.27	6947.31	6621.83	6252.64
Usp49	635.357	0.262174	0.316701	0.100964	2.5967	0.00941234	0.0994273	563.063	568.442	739.29	670.633
Abcg2	2943.85	-0.185865	-0.201528	0.071614	-2.59538	0.00944869	0.0995451	3015.04	3281.77	2877.18	2601.41
Mcoln2	202.435	-0.334251	-0.92579	0.128766	-2.59579	0.00943733	0.0995451	245.41	284.702	193.795	85.8335
Proser3	511.492	0.283316	0.359096	0.109133	2.59606	0.00943004	0.0995451	423.891	472.259	553.699	596.118
Renbp	820.599	-0.311269	-0.431665	0.11993	-2.59541	0.00944788	0.0995451	893.464	990.687	817.218	581.026
Sema4a	270.612	-0.336901	-0.543883	0.129823	-2.59508	0.0094569	0.099548	305.966	335.679	251.215	189.588
Unk	1802.26	0.203395	0.224708	0.0783822	2.59491	0.00946156	0.099548	1586.14	1738.03	1856.94	2027.93
Epo	39.1259	0.302201	1.22668	0.11655	2.59288	0.00951747	0.10007	28.6843	18.2748	60.4967	49.0477
Vps16	2722.93	0.16944	0.18098	0.0653612	2.59236	0.00953192	0.100155	2445.61	2658.5	2837.19	2950.41
2510039O18Rik	1918.1	-0.17367	-0.186201	0.0670129	-2.59159	0.00955347	0.100288	2065.27	2017.92	1839.51	1749.68
Gm4890	100.478	0.346044	0.737873	0.133533	2.59145	0.00955731	0.100288	78.6163	72.1374	120.993	130.165
Apex2	1186.99	-0.20816	-0.231363	0.0803423	-2.59091	0.00957223	0.100315	1319.48	1244.61	1110.47	1073.39
Chmp1a	2617.03	-0.153707	-0.162118	0.0593256	-2.5909	0.00957256	0.100315	2749.45	2777.77	2523.43	2417.49
Nisch	25615.7	0.118261	0.121924	0.0456691	2.58951	0.00961131	0.100654	23898.3	25169.2	25974.6	27420.5
Cdc7	2321.89	0.21907	0.246944	0.0846514	2.58791	0.00965607	0.100665	1999.4	2247.8	2339.89	2700.45
Cs	9902.02	-0.1166	-0.120108	0.0450402	-2.5888	0.00963106	0.100665	10265.8	10360.8	9736.9	9244.55
Foxc1	1015.63	0.279435	0.351382	0.107935	2.58891	0.00962807	0.100665	844.594	940.671	1004.86	1272.41
Gm44941	35.8733	0.296479	1.26998	0.114525	2.58876	0.00963208	0.100665	15.9357	25.9695	55.3699	46.218
Ifitm1	1201.94	-0.208898	-0.23245	0.0807191	-2.58797	0.0096544	0.100665	1285.48	1311.94	1064.33	1146.02
Rraga	3960.86	-0.136856	-0.14267	0.0528839	-2.58785	0.00965759	0.100665	4255.91	4057.97	3765.15	3764.41
Slc25a3	14170.6	-0.133593	-0.138978	0.0516248	-2.58777	0.00965996	0.100665	14246.6	15456.6	13753.3	13225.9
Zkscan1	1111.69	0.217585	0.244803	0.0840857	2.58765	0.00966323	0.100665	1031.57	1004.15	1155.59	1255.43
Hykk	498.212	-0.292745	-0.382051	0.11317	-2.58678	0.00968769	0.100853	591.747	535.74	464.492	400.871
Ago2	10732.6	0.112579	0.115733	0.0435481	2.58517	0.00973306	0.100959	10483.6	10121.4	11340.6	10984.8
C330027C09Rik	5948.24	-0.124413	-0.128725	0.0481319	-2.58483	0.00974258	0.100959	6272.31	6155.72	5557.49	5807.44
Lpar1	1756.94	-0.219056	-0.247023	0.0847456	-2.58486	0.00974182	0.100959	1970.72	1842.87	1726.72	1487.47
Nmnat2	337.49	0.313827	0.442347	0.121392	2.58523	0.00973133	0.100959	309.153	263.542	377.335	399.927
Tctn2	875.493	0.2348	0.270825	0.0908238	2.58523	0.00973135	0.100959	829.721	757.923	948.465	965.862
Trappc8	2776.58	-0.155553	-0.16434	0.0601789	-2.58484	0.00974236	0.100959	2855.68	3012.46	2654.68	2583.49
Zmym6	867.483	0.287694	0.370093	0.111277	2.58538	0.00972718	0.100959	674.613	838.717	899.248	1057.36
Clint1	7096.99	-0.114593	-0.11793	0.0443559	-2.58348	0.0097808	0.101288	7359.13	7413.8	6918.16	6696.9
Prrx2	1640.14	0.183595	0.198811	0.0711166	2.5816	0.0098344	0.101777	1514.96	1539.89	1704.16	1801.56
Plxna4	1051.93	0.22245	0.25212	0.0861846	2.58109	0.00984882	0.101859	946.583	973.374	1194.55	1093.2
Snord49b	73.6972	0.330582	0.9376	0.12816	2.57945	0.00989575	0.102278	40.3705	60.5954	88.1817	105.641
Haus7	1634.22	-0.224719	-0.255572	0.0871436	-2.57872	0.00991682	0.102428	1709.37	1846.72	1603.68	1377.11
Cpne2	348.742	0.306829	0.421708	0.119038	2.57756	0.00995005	0.102665	317.652	278.931	393.741	404.643
Urm1	1446.74	-0.225589	-0.256917	0.0875235	-2.57747	0.00995267	0.102665	1487.34	1662.04	1393.48	1244.11
Twf1	2193.61	-0.181459	-0.196157	0.0704193	-2.57684	0.00997093	0.102786	2338.3	2345.91	2148.15	1942.1
Ccar1	8360.27	-0.110155	-0.113125	0.0427725	-2.57537	0.0100132	0.103092	8550.06	8824.8	8045.04	8021.18

## Sheet: GoF
gene	baseMean	log2FoldChange	lfcMLE	lfcSE	stat	pvalue	padj	CTRL1	CTRL2	CTRL3	GOFGFP1	GOFGFP2	GOFGFP3
Gm7809	669.41	-2.85727	-3.17734	0.148463	-19.2457	1.53523e-82	1.85579e-78	1127.52	1265.97	1223.09	136.49	135.93	127.454
Gpx3	2557.93	0.898549	0.962127	0.123417	7.28058	3.32378e-13	2.00889e-09	1894.42	1634.51	1675.38	3315.34	3343.88	3484.03
Fggy	80.6356	1.5361	2.48028	0.239171	6.42263	1.33938e-10	5.39681e-07	22.3715	35.8971	15.2887	127.112	149.111	134.033
Cdh7	144.056	-1.38731	-1.93401	0.222676	-6.2302	4.65839e-10	1.40776e-06	155.705	260.852	268.826	60.4305	61.7865	56.7378
Abcc9	670.038	-1.119	-1.36093	0.189728	-5.89791	3.68126e-09	7.41652e-06	683.672	1075.72	1135.18	359.457	350.947	415.255
Krt10	235.513	1.0283	1.20052	0.173846	5.91502	3.31826e-09	7.41652e-06	151.231	132.819	143.968	332.368	332.823	319.87
Mybpc1	223.44	1.06191	1.31145	0.194467	5.46063	4.74452e-08	8.1931e-05	107.383	122.05	156.709	312.572	293.28	348.65
A730089K16Rik	283.716	-0.972686	-1.17344	0.186879	-5.20489	1.94107e-07	0.000293296	312.306	427.175	440.823	161.495	178.769	181.725
Zfp703	357.722	0.830726	0.944478	0.161592	5.1409	2.73425e-07	0.00036724	249.666	253.673	230.604	427.181	500.058	485.149
Cep135	3697.78	-0.583104	-0.618436	0.115308	-5.05692	4.26083e-07	0.000515049	4215.68	4524.23	4696.17	2914.21	3001.17	2835.24
Bmp4	1071.92	0.888074	1.04235	0.176356	5.03569	4.76135e-07	0.000523229	777.633	813.667	509.622	1445.12	1364.24	1521.23
Gdf6	256.941	-0.963825	-1.18197	0.192478	-5.00745	5.51561e-07	0.000555605	280.986	418.799	370.75	158.37	145.816	166.924
Myl2	675.409	-0.96047	-1.19663	0.197556	-4.86175	1.16352e-06	0.00108189	861.749	721.531	1238.38	429.265	334.471	467.059
Tceb2	599.752	0.708833	0.787489	0.148942	4.75911	1.94451e-06	0.00167895	479.645	391.278	448.467	729.334	762.857	786.928
Bak1	406.124	0.770304	0.878785	0.163338	4.71602	2.405e-06	0.00181698	292.619	320.68	244.619	526.162	514.063	538.598
Notch3	1446.05	0.636178	0.691498	0.134754	4.72105	2.34627e-06	0.00181698	1035.35	1052.98	1230.74	1779.57	1699.54	1878.1
Gm23935	7689.44	0.834687	0.98227	0.177474	4.70314	2.5619e-06	0.00182166	6054.62	4115	5334.47	10232.6	12314.5	8085.54
Eno1b	720.475	1.05234	1.49257	0.226196	4.65231	3.28238e-06	0.00204421	593.292	326.663	211.493	1008.56	1145.11	1037.73
Lrrc61	236.001	0.841933	0.999737	0.180982	4.65203	3.28684e-06	0.00204421	180.762	138.802	151.613	309.446	309.756	325.626
Triobp	2429.94	0.825843	0.972537	0.177749	4.64613	3.38222e-06	0.00204421	1715.45	1547.16	1658.82	3293.46	2342.12	4022.63
Per1	222.84	0.859814	1.03369	0.185574	4.63328	3.59922e-06	0.00207178	153.916	132.819	151.613	325.075	258.679	314.936
Gm15726	77.8271	-1.13829	-2.71186	0.246913	-4.6101	4.02484e-06	0.00221147	47.4275	235.724	122.309	14.5867	23.8908	23.024
4930405A21Rik	93.3044	1.03252	1.48411	0.227602	4.53651	5.7193e-06	0.00250192	40.2687	46.6662	61.1547	134.406	118.63	158.701
Abra	114.15	-1.01749	-1.4142	0.22271	-4.56867	4.9082e-06	0.00250192	199.554	157.947	140.146	64.5982	73.3199	49.3372
Hmgn1	8935.41	-0.509829	-0.539023	0.112453	-4.53372	5.79531e-06	0.00250192	10559.3	10119.4	11077.9	7295.42	7606.32	6954.08
Slc16a3	673.947	0.910464	1.14119	0.199401	4.56601	4.97105e-06	0.00250192	559.287	338.629	361.832	939.799	747.204	1096.93
Spop	2805.65	-0.66723	-0.738866	0.146995	-4.53913	5.64872e-06	0.00250192	2981.67	4058.76	3487.09	2025.46	2253.97	2026.94
Stc2	655.732	1.08884	1.72312	0.239069	4.55452	5.2505e-06	0.00250192	398.212	220.169	295.581	983.559	476.991	1559.88
Zfp395	1300.27	0.921018	1.17672	0.204732	4.49864	6.83882e-06	0.00285061	955.71	786.146	649.768	1827.5	1204.42	2378.05
Pbdc1	899.528	-0.730253	-0.83193	0.162712	-4.48802	7.18888e-06	0.00289664	1202.69	1332.98	919.868	627.227	651.641	662.763
Hcn4	438.248	0.78822	0.924949	0.176275	4.47153	7.76609e-06	0.00293364	355.259	314.698	235.7	585.551	567.612	570.667
Sox12	574.4	0.723053	0.821727	0.161465	4.47808	7.53184e-06	0.00293364	476.96	350.595	416.616	727.25	774.39	700.588
Kdm6b	1745.51	0.66558	0.739892	0.149322	4.45734	8.29834e-06	0.00303971	1422.83	1135.54	1363.24	2227.59	1917.85	2406.01
Homer2	2598.09	-0.696098	-0.783904	0.156667	-4.44318	8.86397e-06	0.00312252	2884.13	2932.79	4045.13	1929.61	1973.05	1823.83
Leng8	1886.86	0.612821	0.669417	0.138225	4.43351	9.27114e-06	0.00312252	1662.65	1318.62	1387.45	2288.02	2420.38	2244.02
Natd1	1047.43	0.668776	0.745391	0.150868	4.43285	9.29936e-06	0.00312252	874.277	770.59	702.004	1293	1460.63	1184.09
Egln3	644.235	1.07259	1.82138	0.243936	4.39699	1.09761e-05	0.00358593	317.675	324.27	210.219	965.847	390.49	1656.91
Itgb8	1391.57	-0.815731	-0.984153	0.18703	-4.36149	1.29179e-05	0.00410926	1272.49	2323.74	1950.58	925.212	948.216	929.184
Gm7162	163.141	0.846166	1.04791	0.195502	4.32817	1.50357e-05	0.00454378	101.119	113.674	104.473	225.052	192.774	241.752
Tmsb10	1187.19	0.614189	0.674516	0.141772	4.33223	1.4761e-05	0.00454378	982.555	786.146	974.652	1415.95	1481.23	1482.58
H2-T24	217.224	-1.04847	-1.73934	0.242575	-4.32226	1.54442e-05	0.0045534	311.411	533.67	157.983	89.6039	93.0916	117.587
Myl7	1834.71	0.591554	0.645861	0.13788	4.29034	1.78397e-05	0.00513444	1621.48	1362.89	1305.91	2336.99	2109.8	2271.16
Mpp2	525.239	0.898235	1.17816	0.211234	4.25233	2.11562e-05	0.00594736	385.684	259.655	319.788	712.664	499.235	974.41
Gdap10	1533.28	0.800625	0.970852	0.188809	4.24041	2.23113e-05	0.00599331	781.212	970.417	1358.14	1970.24	1765.44	2354.21
Hnrnpu	42458	-0.446323	-0.468381	0.105253	-4.24049	2.23036e-05	0.00599331	49032.9	48505.3	50332.8	35157	37148.5	34571.4
Spry4	756.972	0.816084	1.0054	0.194079	4.2049	2.61194e-05	0.00686373	468.011	362.56	680.346	1025.24	950.688	1054.99
Psenen	172.336	0.994105	1.54434	0.237439	4.18677	2.82948e-05	0.00727719	139.598	70.5976	52.2363	271.937	280.099	219.551
Bnip3	546.2	0.976753	1.47584	0.234625	4.16303	3.14052e-05	0.00777862	365.997	227.348	272.648	769.968	418.5	1222.74
Vegfb	419.165	0.799303	0.978403	0.192043	4.16211	3.15315e-05	0.00777862	367.787	224.955	252.263	580.341	504.177	585.468
Ddit4	157.389	1.01793	2.44852	0.246413	4.13098	3.6122e-05	0.00873286	52.7967	33.5039	59.8806	275.063	60.9626	462.125
Sepw1	199.186	0.997829	1.66378	0.242934	4.1074	4.00133e-05	0.00948393	147.652	95.7255	42.0438	286.524	377.309	245.864
Tdgf1	130.845	-0.911743	-1.26807	0.222857	-4.09115	4.29239e-05	0.00997816	178.077	191.451	184.738	95.8553	51.0768	83.8732
Zfp36l1	1267.95	0.624312	0.699078	0.153542	4.06606	4.78156e-05	0.0109056	1107.84	979.99	810.299	1609.74	1655.05	1444.76
2500002B13Rik	247.738	0.950033	1.43282	0.234311	4.05458	5.02253e-05	0.0110386	106.488	175.896	119.761	390.715	205.131	488.438
Tecr	3027.06	0.687633	0.794661	0.169594	4.05458	5.02245e-05	0.0110386	2774.96	2121.52	1742.91	3854.01	4148.75	3520.21
Cdkn1a	136.445	0.907095	1.277	0.224952	4.0324	5.52103e-05	0.0115066	101.119	87.3495	49.6882	185.459	191.126	203.927
Dffa	324.285	-0.767557	-0.934283	0.19016	-4.03637	5.42846e-05	0.0115066	504.701	333.843	438.275	221.926	247.97	198.993
Wbp2	303.97	0.805491	1.00995	0.19953	4.03695	5.41507e-05	0.0115066	270.247	166.323	166.901	406.343	410.262	403.743
Mid1	1229.2	-0.932888	-1.37352	0.231579	-4.02838	5.61633e-05	0.0115068	774.053	2424.25	2123.85	648.065	730.728	674.275
Eed	1932.49	-0.597642	-0.66434	0.149291	-4.0032	6.24914e-05	0.0124322	1949.9	2548.69	2611.81	1496.18	1421.91	1566.46
Mns1	2654.03	-0.552302	-0.603119	0.137997	-4.00227	6.27368e-05	0.0124322	2900.24	3041.68	3661.63	2097.36	2224.31	1998.98
Capns1	3585.38	0.597209	0.664659	0.150024	3.98075	6.86993e-05	0.0133942	3201.81	2875.36	2242.34	4369.75	4358	4465.02
Gm38193	125.075	0.885823	1.23408	0.222944	3.9733	7.08832e-05	0.0134522	58.1658	63.4182	103.198	175.04	179.593	171.036
Ret	567.66	0.702846	0.826336	0.17709	3.96886	7.22188e-05	0.0134522	489.488	360.167	377.12	750.172	817.229	611.781
Tagln2	566.558	0.858027	1.15085	0.216211	3.96847	7.23357e-05	0.0134522	506.49	324.27	222.96	796.016	668.941	880.669
Cetn3	2723.59	-0.469757	-0.500157	0.118709	-3.9572	7.58335e-05	0.0136817	3151.69	3423.38	2997.85	2279.69	2234.2	2254.71
Lars2	3910.04	0.586546	0.650734	0.148137	3.95949	7.51086e-05	0.0136817	3258.18	2652.79	3216.99	4910.5	5320.23	4101.57
Trappc6b	941.279	-0.516792	-0.558946	0.131205	-3.93881	8.18884e-05	0.0145569	1203.59	1098.45	1061.29	765.801	767.8	750.748
Shcbp1l	220.942	-0.88665	-1.25065	0.225324	-3.935	8.31981e-05	0.0145753	188.815	416.406	328.706	129.196	117.806	144.722
Slc2a1	7817.45	0.736286	0.889247	0.187448	3.92795	8.56721e-05	0.0147943	6545.89	4387.82	5510.29	10286.7	7505.82	12668.1
Fibp	526.575	0.647877	0.74197	0.165323	3.91886	8.89673e-05	0.015147	468.011	343.415	369.476	630.353	693.656	654.54
Pfkfb3	1695.8	0.839609	1.11972	0.215004	3.90508	9.4194e-05	0.0158141	1217.9	1092.47	895.661	2304.7	1374.13	3289.97
Ndrg1	103.007	0.955328	2.40183	0.245144	3.89701	9.73876e-05	0.0161263	40.2687	32.3074	25.4811	184.417	40.3671	295.201
Dhcr7	639.163	0.70588	0.839717	0.181827	3.88216	0.000103533	0.0169122	589.712	358.971	424.26	824.147	825.467	812.419
Rpl10a	3782.59	0.588674	0.658096	0.152617	3.85719	0.000114696	0.0184859	3542.75	2705.44	2553.21	4668.78	4922.32	4303.03
Dtx3	179.206	0.861978	1.20938	0.224513	3.83933	0.000123373	0.0196228	157.495	78.9735	86.6358	265.686	255.384	231.063
Gpc2	115.263	0.798012	1.03423	0.208173	3.83342	0.000126375	0.0197561	78.7476	74.1873	73.8952	143.783	147.464	173.502
Ucp2	322.163	0.824592	1.10085	0.215227	3.83128	0.00012748	0.0197561	276.511	211.793	124.857	429.265	448.982	441.568
Ube2c	3185.39	0.49843	0.53847	0.130351	3.82376	0.000131434	0.0201111	2903.82	2433.82	2453.83	3837.34	3927.97	3555.57
Hoxb1	839.853	0.615678	0.699659	0.161397	3.81468	0.000136362	0.0206042	531.546	767.001	623.013	1037.74	1021.54	1058.28
Gmppa	219.145	0.755193	0.945434	0.199026	3.79445	0.000147972	0.0220825	174.498	157.947	115.939	301.111	251.265	314.114
Abca1	769.517	-0.495875	-0.536422	0.131333	-3.77571	0.000159551	0.0232368	893.964	929.734	909.675	602.222	649.17	632.338
Gapdh	22928.1	0.768719	0.977372	0.203492	3.77764	0.000158319	0.0232368	23034.6	11467.9	11832.2	30538.3	28413.5	32282.2
G6pc3	307.347	0.654516	0.763374	0.173657	3.76901	0.000163897	0.0235855	254.14	232.134	196.205	416.762	362.481	382.363
Stk17b	748.703	-0.690927	-0.825814	0.183594	-3.76334	0.000167658	0.0238429	706.939	1197.77	968.282	514.701	548.664	555.866
Prkca	431.569	-0.641067	-0.742387	0.170487	-3.76021	0.000169768	0.0238622	451.009	597.088	573.325	321.949	295.751	350.294
Gm43176	183.764	0.747602	0.937103	0.199389	3.74946	0.000177214	0.0246226	147.652	132.819	96.8282	243.806	237.26	244.219
Lactb	292.421	-0.680841	-0.811803	0.182662	-3.72732	0.000193525	0.0265833	333.782	440.337	343.995	208.381	235.612	192.415
Prkaca	1367.46	0.655885	0.770141	0.176585	3.71427	0.000203789	0.0271303	1288.6	958.452	783.544	1772.28	1817.35	1584.55
Scd1	2240.85	0.557046	0.61971	0.149788	3.7189	0.000200092	0.0271303	1988.38	1779.3	1531.41	2703.75	2417.09	3025.19
Sdc4	380.287	0.829782	1.15627	0.223437	3.71371	0.00020424	0.0271303	357.944	148.375	198.753	504.282	500.058	572.312
Abcb8	327.871	0.707918	0.865315	0.191594	3.69488	0.000219994	0.0277009	298.883	190.254	206.397	446.978	420.148	404.565
Egln1	2927.09	0.770651	0.998548	0.208399	3.69795	0.000217345	0.0277009	2280.1	1873.83	1703.41	3918.61	2401.43	5385.16
Htatsf1	6549.02	-0.4555	-0.487491	0.123026	-3.70246	0.000213515	0.0277009	6840.3	8288.63	7807.41	5456.46	5449.56	5451.76
Ifitm2	245.007	0.776258	1.01257	0.209991	3.69664	0.000218475	0.0277009	203.133	177.092	105.747	319.865	331.999	332.204
Vangl2	2901.16	0.501189	0.54537	0.135569	3.69694	0.000218218	0.0277009	2633.57	2401.51	2041.04	3389.32	3420.5	3521.03
Pfn1	2705.33	0.671494	0.799508	0.182168	3.68612	0.000227703	0.027837	2639.83	1767.33	1513.58	3446.62	3631.4	3233.23
Ppp1r3c	316.973	0.816042	1.12434	0.221402	3.6858	0.000227983	0.027837	248.771	166.323	182.19	416.762	291.632	596.158
Vldlr	1552.63	0.882007	1.39353	0.239133	3.68836	0.000225705	0.027837	779.422	959.648	829.41	2241.14	889.725	3616.42
Cox7b	1893.03	-0.761896	-0.983631	0.207485	-3.67205	0.00024061	0.028797	1733.34	2067.67	3743.17	1308.63	1232.43	1272.9
Grin3a	243.462	-0.751948	-0.960672	0.204733	-3.67283	0.00023988	0.028797	297.093	263.245	405.15	152.118	144.992	198.171
Rpf1	1836.4	-0.485167	-0.525625	0.132419	-3.66389	0.000248416	0.0294397	1914.1	2323.74	2265.27	1473.25	1545.49	1496.56
1010001N08Rik	148.893	0.800758	1.09352	0.219633	3.64589	0.000266463	0.0312719	96.6448	123.247	64.9768	185.459	201.836	221.195
St8sia4	753.117	-0.642295	-0.754492	0.176702	-3.6349	0.000278088	0.0323224	714.098	982.383	1141.55	572.006	561.021	547.643
Hist1h2bb	223.768	0.798065	1.09043	0.219897	3.62927	0.000284225	0.0326515	204.923	124.443	98.1023	301.111	322.937	291.089
Mov10	252.984	0.716677	0.89269	0.197591	3.62707	0.000286656	0.0326515	222.82	150.768	156.709	293.817	322.937	370.851
Ndfip2	1069.02	-0.514567	-0.565357	0.142046	-3.62254	0.000291725	0.0326515	1108.73	1321.01	1398.91	855.405	852.653	877.38
Zscan10	223.069	0.675139	0.812985	0.18628	3.62433	0.000289714	0.0326515	175.392	137.605	171.997	301.111	297.399	254.909
Eif4ebp2	4216.17	0.403726	0.426428	0.111546	3.61939	0.000295302	0.0327487	3795.1	3531.07	3465.43	4822.98	4857.24	4825.18
Msl1	5989.92	-0.449207	-0.481616	0.124475	-3.60882	0.000307596	0.0336271	7521.29	6768.99	6650.57	4954.26	5404.25	4640.16
Rps6ka6	12517.1	-0.561996	-0.631831	0.155772	-3.60781	0.000308787	0.0336271	11926.7	17854	15865.8	9613.66	9615.62	10226.8
Lss	1759.96	0.505533	0.554134	0.140542	3.59703	0.000321868	0.034568	1616.12	1233.66	1426.94	2123.4	2056.25	2103.41
Ticam1	136.204	0.759682	0.99663	0.211257	3.596	0.000323145	0.034568	113.647	76.5804	81.5395	194.836	176.297	174.325
Trnt1	2871.16	-0.473884	-0.513241	0.132203	-3.58451	0.000337712	0.0358093	3325.3	3782.35	3022.06	2319.28	2457.45	2320.49
Ranbp2	17531.1	-0.427955	-0.456066	0.119488	-3.58156	0.000341546	0.0359009	19601	21842.2	19394.9	14536.7	15831.3	13980.5
Kcnip1	83.6403	0.884959	1.6596	0.247575	3.5745	0.000350891	0.0362382	48.3224	28.7177	43.3179	138.573	180.416	62.4938
Polm	145.08	0.711666	0.8916	0.199132	3.57385	0.000351773	0.0362382	105.593	92.1358	107.021	189.627	169.707	206.394
Rnf157	317.4	0.74801	0.973093	0.209387	3.57238	0.000353748	0.0362382	289.04	209.4	142.694	418.846	406.967	437.456
Ankle1	588.555	0.540083	0.602441	0.151341	3.56865	0.00035883	0.0364499	510.965	455.893	434.453	709.538	652.465	768.016
Adgra2	991.331	0.524423	0.581489	0.147816	3.54782	0.000388434	0.0366827	905.597	788.539	686.716	1230.49	1165.7	1170.94
Akap12	6986.93	-0.431089	-0.460392	0.121287	-3.55431	0.000378977	0.0366827	7302.95	8305.38	8669.95	5962.83	5700.83	5979.67
Fbrs	419.727	0.754555	0.991647	0.211802	3.56255	0.000367265	0.0366827	405.371	218.972	216.589	552.21	621.16	504.062
Gltscr1	1190.04	0.443837	0.476122	0.124897	3.55362	0.000379966	0.0366827	960.184	984.776	1042.18	1344.06	1374.13	1434.89
Gstm1	257.918	0.666355	0.805606	0.187772	3.54874	0.000387083	0.0366827	216.556	195.041	150.339	358.416	309.756	317.403
Ift74	2102.89	-0.417119	-0.443449	0.117412	-3.55262	0.000381408	0.0366827	2320.37	2563.05	2387.58	1801.45	1774.51	1770.38
Mbd6	357.127	0.738331	0.953071	0.207464	3.55884	0.000372493	0.0366827	314.99	245.297	168.175	455.313	550.311	408.676
Shmt2	1068.54	0.736592	0.950715	0.207453	3.55064	0.000384298	0.0366827	1078.31	555.208	550.392	1447.21	1308.23	1471.89
Treml2	83.2939	-0.866605	-1.45403	0.243362	-3.56098	0.000369475	0.0366827	75.1682	162.733	128.68	38.5505	37.0719	57.5601
Dscc1	409.855	-0.530642	-0.590824	0.150257	-3.53155	0.000413126	0.0369022	474.275	489.397	514.718	315.697	341.061	323.981
Ezh2	7969.32	-0.383744	-0.404074	0.108604	-3.53343	0.000410197	0.0369022	8611.23	9408.62	9215.24	6874.49	6887.95	6818.4
Fbxl20	1672.31	0.460288	0.497408	0.130561	3.52545	0.000422758	0.0369022	1434.46	1328.19	1397.64	1915.02	1809.11	2149.46
Foxp4	1152.35	0.609513	0.708378	0.17215	3.54059	0.000399229	0.0369022	958.394	1017.08	648.494	1415.95	1488.64	1385.55
Hist1h2bl	483.668	0.82926	1.25944	0.235342	3.52363	0.000425675	0.0369022	481.434	160.34	211.493	709.538	721.666	617.537
Kif26b	1286.87	-0.439933	-0.471961	0.124957	-3.52068	0.000430444	0.0369022	1466.67	1464.6	1555.62	1067.95	1136.87	1029.5
Nabp2	584.708	0.567098	0.643195	0.160464	3.53411	0.000409147	0.0369022	532.441	440.337	394.957	751.214	688.713	700.588
Npas3	211.524	-0.761393	-1.02002	0.215911	-3.52642	0.000421221	0.0369022	228.189	226.152	396.231	135.448	137.578	145.545
Setd6	1072.18	-0.607282	-0.706311	0.172458	-3.52134	0.00042937	0.0369022	1058.62	1265.97	1665.19	785.597	862.539	795.151
St3gal1	1715.08	0.511878	0.565098	0.145104	3.52766	0.000419251	0.0369022	1395.09	1449.04	1305.91	2046.3	1763.8	2330.36
Syngap1	1065.36	0.513926	0.56762	0.145403	3.53449	0.000408568	0.0369022	933.338	908.196	732.582	1277.38	1221.72	1318.95
Tubb4a	891.826	0.498209	0.546562	0.14108	3.5314	0.000413361	0.0369022	747.207	768.197	658.687	1060.66	1132.75	983.455
Zfp961	1849.64	-0.562117	-0.636263	0.159401	-3.52643	0.000421197	0.0369022	1932.9	2773.65	2047.41	1378.44	1486.99	1478.47
Magt1	6159.47	-0.581334	-0.66575	0.165303	-3.51679	0.000436802	0.0371835	6275.65	6728.31	9664.98	4785.47	4894.31	4608.09
Lrrn3	81.9291	-0.84215	-1.34945	0.240182	-3.5063	0.000454378	0.0381409	86.8013	94.5289	171.997	46.8858	46.9577	44.4035
Plbd2	659.214	0.508433	0.561266	0.145081	3.50447	0.000457514	0.0381409	579.869	531.277	485.415	802.267	813.11	743.347
Zfp385a	236.903	0.691933	0.861097	0.197303	3.50695	0.000453271	0.0381409	200.448	178.289	124.857	302.153	323.761	291.912
Gm9825	209.638	0.755202	1.01373	0.216345	3.49074	0.000481689	0.0397597	173.603	94.5289	147.79	265.686	332.823	243.397
P4ha2	466.927	0.837207	1.33486	0.239906	3.48973	0.00048351	0.0397597	278.301	281.194	235.7	644.94	291.632	1069.79
Cnppd1	322.946	0.707092	0.898437	0.203323	3.47769	0.00050576	0.041031	287.25	226.152	161.805	410.511	480.287	371.674
Tmed8	1154.69	-0.43723	-0.469515	0.125719	-3.47783	0.000505484	0.041031	1314.55	1361.7	1346.68	978.349	1014.12	912.738
Kcnc3	140.533	0.715613	0.920571	0.206335	3.46822	0.000523926	0.0416659	93.0654	106.495	91.732	217.758	161.469	172.68
Nynrin	672.232	0.667223	0.816995	0.19221	3.47132	0.000517901	0.0416659	663.091	386.492	408.972	848.111	842.767	883.958
Sox9	1870.57	0.538491	0.604823	0.155236	3.46886	0.000522666	0.0416659	1573.16	1188.19	1690.67	2317.2	2135.34	2318.85
Tada3	465.818	0.606508	0.709641	0.175079	3.46419	0.000531829	0.0420179	415.215	301.535	342.721	565.755	653.289	516.396
Dusp4	571.459	0.584626	0.675084	0.169252	3.45417	0.000551987	0.0427719	540.495	397.261	380.943	700.161	706.837	703.055
Fdps	104.7	0.740258	0.984138	0.214096	3.45759	0.000545024	0.0427719	71.5887	74.1873	64.9768	145.867	120.278	151.301
Gabarap	446.715	0.575589	0.660926	0.166604	3.45483	0.000550643	0.0427719	406.266	333.843	296.855	551.168	529.716	562.444
Ppard	411.972	0.545929	0.616519	0.158156	3.45183	0.000556799	0.04287	340.046	300.339	335.077	502.199	456.396	537.775
Cd248	416.5	0.756741	1.0325	0.219668	3.44493	0.000571201	0.0434498	389.264	270.425	159.257	537.623	589.031	553.399
Nlgn2	512.693	0.664414	0.815213	0.192875	3.44478	0.000571518	0.0434498	484.119	342.219	286.662	663.694	576.674	722.79
Gfra2	534.875	-0.800698	-1.18839	0.232658	-3.44152	0.000578452	0.0437021	337.362	974.007	919.868	314.656	320.466	342.894
Osr1	200.726	0.840043	1.42979	0.244266	3.43905	0.000583759	0.0438291	181.656	94.5289	48.4141	296.943	340.237	242.575
Rbck1	641.013	0.499486	0.551711	0.145446	3.43416	0.000594383	0.0443512	572.71	496.576	489.237	781.429	721.666	784.461
Ppa1	2338.05	-0.49598	-0.547082	0.14459	-3.43026	0.000602997	0.044718	3278.76	2570.23	2478.04	1880.64	1928.56	1892.08
Smchd1	12592	-0.385233	-0.407276	0.112418	-3.4268	0.000610739	0.0450159	13496.3	15238.3	14339.5	10701.4	11153.7	10623.1
Kif5b	15458.7	-0.449421	-0.486275	0.131492	-3.41786	0.000631161	0.0462392	16071.7	20173	17875	12881.1	13670.5	12081
Lrp3	543.015	0.558834	0.638828	0.164449	3.39822	0.000678252	0.0493898	495.752	412.816	364.38	614.724	703.542	666.874
Nr1h2	116.532	0.758857	1.06271	0.224237	3.38417	0.000713938	0.0513695	102.014	63.4182	59.8806	147.951	163.116	162.813
Slc8a3	130.923	0.731351	0.980321	0.216053	3.38506	0.000711637	0.0513695	112.752	75.3838	75.1693	162.537	191.95	167.746
Zmiz1	9576.11	0.41175	0.440039	0.121859	3.3789	0.000727752	0.0520536	8653.29	8413.08	7313.08	11047.3	10601.7	11428.1
1110002E22Rik	110.999	-0.781793	-1.15337	0.231871	-3.37168	0.000747121	0.052814	117.227	173.502	169.449	51.0534	91.4439	63.3161
Slc2a3	6571.03	0.671673	0.840873	0.199126	3.37311	0.000743249	0.052814	6412.56	3649.54	4061.69	8465.48	6497.46	10339.4
G530011O06Rik	240.687	-0.708401	-3.89861	0.210477	-3.36569	0.000763516	0.0536592	78.7476	756.232	518.54	19.7962	46.9577	23.8463
Cuta	742.91	0.47384	0.519884	0.141165	3.35664	0.000788958	0.0544967	674.724	573.157	582.243	898.123	854.301	874.913
Sdk2	1425.58	0.504085	0.561098	0.150117	3.35795	0.000785231	0.0544967	1278.75	1230.07	945.349	1644.13	1744.85	1710.36
Tbl2	1507.88	0.677745	0.856434	0.201811	3.35831	0.000784198	0.0544967	1322.6	1031.44	863.809	1967.12	1346.94	2515.37
Acp1	672.149	0.782761	1.16937	0.23348	3.35259	0.000800597	0.0548696	541.39	361.364	337.625	924.17	1386.49	481.86
Nsdhl	1169.97	0.55599	0.637484	0.165888	3.35161	0.000803435	0.0548696	1038.93	872.299	834.506	1420.12	1677.3	1176.69
Arhgap1	1356.76	0.54972	0.628295	0.164351	3.34479	0.00082344	0.0559199	1318.13	908.196	969.556	1635.79	1766.27	1542.61
Mettl14	2000.95	-0.471356	-0.517062	0.141025	-3.34237	0.000830655	0.0560948	2161.08	2175.36	2731.57	1661.84	1696.24	1579.61
Eif4ebp1	342.158	0.614673	0.736568	0.184567	3.33035	0.000867365	0.0581132	274.722	244.1	250.989	388.631	366.6	527.908
Zfp952	486.907	-0.588336	-0.691084	0.176706	-3.32946	0.000870159	0.0581132	541.39	725.121	537.651	385.505	408.614	323.159
Polr2f	155.912	0.759593	1.0926	0.228459	3.32486	0.000884626	0.0587547	136.913	98.1187	62.4287	204.214	244.674	189.126
Rara	812.791	0.640221	0.785133	0.19272	3.32202	0.000893673	0.0590313	808.953	528.883	451.016	1010.65	964.692	1112.55
5430416N02Rik	1066.86	0.572209	0.665445	0.172455	3.31803	0.000906554	0.0595567	1031.77	796.915	644.672	1285.71	1359.3	1282.77
Ppdpf	232.767	0.593765	0.701575	0.179102	3.31523	0.000915671	0.0598304	195.974	179.485	155.435	301.111	274.332	290.267
Mdk	3185.62	0.620394	0.749362	0.187512	3.30855	0.000937808	0.0609475	3259.97	2102.37	1764.57	4069.68	4049.9	3867.21
Asic2	85.1947	0.765973	1.13391	0.23221	3.29862	0.000971621	0.0624731	68.9042	40.6833	49.6882	119.819	101.33	130.744
Rnf126	426.367	0.530206	0.601628	0.160699	3.29938	0.00096898	0.0624731	375.841	313.501	326.158	487.612	492.644	562.444
Bhlhe41	304.194	0.813487	1.5102	0.247464	3.2873	0.00101154	0.0646954	159.285	214.186	100.65	435.517	172.178	743.347
Zfp691	166.341	0.692532	0.906799	0.210906	3.2836	0.0010249	0.0652052	147.652	105.298	93.006	228.177	233.965	189.948
Atp2c1	4893.29	-0.378131	-0.401064	0.11536	-3.27783	0.0010461	0.0655192	5514.12	5413.28	5780.39	4123.86	4498.88	4029.2
Cldn6	2499.52	0.522669	0.59164	0.159441	3.27814	0.00104494	0.0655192	2334.69	2015.02	1630.79	3022.57	3313.4	2680.65
Zfp131	1622.33	-0.464065	-0.50948	0.141569	-3.27801	0.0010454	0.0655192	1864.89	1963.57	1889.42	1301.34	1534.78	1179.98
Cnot6	6219.93	-0.413065	-0.443809	0.126156	-3.27425	0.00105942	0.0656734	6759.77	8008.64	6739.75	5114.72	5517.12	5179.58
Rngtt	2189.49	-0.426513	-0.460703	0.13022	-3.27533	0.00105537	0.0656734	2295.31	2518.78	2795.28	1872.3	1886.55	1768.74
Prdm9	151.889	0.683994	0.889108	0.209058	3.2718	0.00106866	0.0659081	103.804	130.426	85.3617	180.25	189.478	222.017
Pi15	78.7615	-0.811719	-1.58617	0.248246	-3.26981	0.00107619	0.0660356	49.2173	160.34	145.242	39.5924	32.129	46.0481
Cdh5	2058.15	0.459883	0.504435	0.140991	3.2618	0.00110707	0.0675105	1924.84	1724.26	1454.97	2454.73	2363.54	2426.57
Metap2	7547.51	-0.413303	-0.444402	0.126753	-3.26069	0.0011114	0.0675105	9521.3	7715.48	8864.88	6430.64	6578.2	6174.55
Ppp1r16b	498.894	0.532709	0.607782	0.163475	3.25865	0.00111942	0.0676578	459.063	342.219	383.491	605.347	570.083	633.161
Top2b	16454.9	-0.439271	-0.477544	0.134901	-3.25625	0.00112893	0.0678932	17468.5	22281.3	17711.9	13426	14083.2	13758.5
Prss35	84.8991	-0.80785	-1.62622	0.248414	-3.25203	0.00114585	0.0682316	67.1144	89.7427	228.056	47.9277	43.6624	32.8915
Zfp865	1009.59	0.489108	0.544641	0.150346	3.25322	0.00114104	0.0682316	931.548	735.89	795.01	1213.82	1295.04	1086.24
Col3a1	3949.91	-0.486913	-0.541708	0.149805	-3.25032	0.00115276	0.068307	3976.75	5623.87	4449	3148.64	3195.6	3305.59
Mrvi1	113.949	-0.760294	-1.14654	0.234495	-3.24226	0.00118588	0.069469	97.5396	204.613	169.449	61.4724	74.9676	75.6504
Porcn	186.417	0.73775	1.05405	0.227501	3.24283	0.00118347	0.069469	179.867	98.1187	84.0876	262.56	268.565	225.307
Zbtb41	2364.97	-0.473815	-0.523981	0.146178	-3.24136	0.00118962	0.069469	2492.18	3236.72	2641.12	1926.48	2104.03	1789.3
Sema4g	189.781	0.776819	1.23761	0.239883	3.23833	0.00120231	0.0698728	170.023	62.2216	105.747	293.817	187.831	319.047
Gys1	540.888	0.676593	0.880063	0.209375	3.23148	0.0012315	0.0707653	496.647	335.039	309.595	692.867	513.239	897.937
Klhl31	1064.34	-0.643788	-0.806423	0.199277	-3.23062	0.00123523	0.0707653	978.976	1350.93	1733.99	735.585	630.222	956.319
Plpp5	486.253	0.490825	0.547998	0.151845	3.2324	0.00122753	0.0707653	404.476	385.295	394.957	585.551	521.478	625.76
Gm15344	262.99	-0.572229	-0.673075	0.177265	-3.2281	0.00124616	0.0710548	306.042	309.911	354.187	197.962	182.064	227.773
Mad2l2	212.193	0.691764	0.92015	0.214502	3.22498	0.00125981	0.0714956	194.184	134.016	110.843	252.141	331.999	249.975
Kpna2	4168.61	-0.41442	-0.44677	0.12876	-3.21856	0.00128836	0.0717683	4635.37	4493.12	5298.8	3594.57	3728.61	3261.19
Pgrmc1	969.82	-0.46278	-0.509818	0.143762	-3.21906	0.00128611	0.0717683	995.978	1197.77	1225.64	785.597	769.447	844.488
Srek1	8543.45	-0.379192	-0.403307	0.117802	-3.2189	0.00128685	0.0717683	8853.74	10236.6	10100.7	7188.11	7376.48	7505.01
Wdr46	3062.44	0.496386	0.556442	0.154158	3.21998	0.00128201	0.0717683	2741.85	2011.43	2683.16	3687.3	3952.69	3298.19
Fam204a	854.588	-0.494187	-0.553458	0.153621	-3.21693	0.00129568	0.071845	938.707	1137.94	973.378	685.574	775.214	616.715
Ccng2	869.802	0.658979	0.842426	0.204962	3.21513	0.00130384	0.0719673	663.091	694.01	510.896	1163.81	734.847	1452.16
Rab3gap1	746.026	-0.462037	-0.509281	0.144113	-3.20608	0.00134556	0.0739322	841.168	963.238	824.314	660.568	607.155	579.712
Pcdhga2	89.3273	0.728518	1.04565	0.22799	3.19539	0.00139641	0.076379	60.8504	70.5976	43.3179	105.232	126.044	129.921
Sh2b1	324.624	0.606476	0.737577	0.189922	3.19329	0.00140663	0.0765917	310.516	211.793	206.397	404.259	384.724	430.056
Cacng7	565.457	0.648913	0.82533	0.203619	3.1869	0.00143808	0.0773236	541.39	385.295	295.581	777.262	580.793	812.419
Scarb1	372.413	0.605125	0.735773	0.189846	3.18745	0.00143535	0.0773236	347.205	265.638	224.234	438.642	427.562	531.197
Tbx5	2271.48	0.493998	0.554626	0.155021	3.18666	0.00143926	0.0773236	1849.67	2147.84	1522.5	2749.59	2455.81	2903.49
Prrc2a	9624.09	0.549177	0.638703	0.17247	3.18418	0.00145164	0.0776434	9746.81	5982.84	6851.87	11765.2	12620.1	10777.7
Prr12	1369.94	0.503355	0.568457	0.158224	3.18129	0.00146623	0.0780784	1324.39	1014.69	969.556	1635.79	1775.33	1499.85
Rap1b	2035.03	-0.420375	-0.455529	0.132582	-3.17068	0.00152082	0.0806301	2270.26	2373.99	2416.88	1761.86	1869.25	1517.94
Cnbp	17291	-0.346145	-0.364721	0.109237	-3.16874	0.00153101	0.0807629	19988.5	19398.8	19007.6	15060.7	15896.4	14394.1
Ndufv3	392.154	0.707549	0.985307	0.223366	3.16766	0.00153669	0.0807629	342.731	196.237	249.715	552.21	333.647	678.386
Erbin	7133.62	-0.436293	-0.476402	0.137957	-3.16253	0.00156403	0.080795	7072.07	9421.78	8410.04	5839.88	6154.75	5903.2
Gm42748	241.234	0.626228	0.780641	0.197817	3.16568	0.00154719	0.080795	193.29	197.434	141.42	274.021	363.304	277.933
Pom121	6450.99	0.354988	0.375217	0.112211	3.16357	0.00155847	0.080795	5745	5384.56	5720.51	7295.42	7619.51	6940.92
Sdc3	468.523	0.60549	0.739701	0.191435	3.1629	0.00156207	0.080795	437.586	252.476	361.832	558.461	571.731	629.049
D130017N08Rik	374.791	0.621184	0.771363	0.196698	3.15806	0.00158822	0.0814249	355.259	275.211	198.753	468.858	497.587	453.08
Rere	6250.49	0.341568	0.359502	0.108167	3.15779	0.0015897	0.0814249	5711.89	5296.01	5418.56	6938.05	7079.08	7059.33
Csrp1	1065.15	0.670712	0.884288	0.212565	3.15532	0.0016032	0.0814264	1097.99	662.899	482.867	1399.28	1215.96	1531.92
Soga1	2617.41	0.427556	0.465194	0.135481	3.15584	0.00160035	0.0814264	2308.74	1977.93	2309.86	3124.68	3251.61	2731.64
Gm37648	283.837	0.663856	0.867968	0.210481	3.15399	0.00161054	0.0814569	166.444	215.382	221.686	368.835	261.151	469.526
Tdrd12	100.335	0.723547	1.05049	0.229535	3.15223	0.00162026	0.0816072	57.271	55.0422	84.0876	147.951	152.407	105.253
3110040N11Rik	223.277	0.586275	0.706081	0.186352	3.14606	0.00165485	0.0829713	159.285	199.827	150.339	257.351	294.104	278.755
Bcorl1	845.744	0.52193	0.598566	0.166021	3.14376	0.00166794	0.0829713	831.324	604.267	580.969	984.601	1056.14	1017.17
Tspan13	2229.37	-0.54928	-0.642091	0.174689	-3.14434	0.00166464	0.0829713	2537.82	3346.8	2267.82	1733.73	1454.86	2035.16
Akap11	9970.06	-0.352344	-0.372406	0.112169	-3.14119	0.00168263	0.0831862	10710.6	12053	10986.2	8711.37	8782.74	8576.45
Wdr54	191.451	0.680748	0.915554	0.216757	3.1406	0.00168602	0.0831862	153.021	122.05	122.309	262.56	175.474	313.291
Fblim1	878.611	0.446894	0.491302	0.142452	3.13716	0.00170592	0.0832319	719.467	799.308	672.701	985.643	981.993	1112.55
Gltp	478.339	0.536483	0.621734	0.170902	3.13912	0.00169457	0.0832319	451.009	351.791	326.158	592.844	614.569	533.664
Rnf152	193.531	0.742316	1.14212	0.236684	3.13632	0.0017108	0.0832319	135.124	118.46	108.295	225.052	159.821	414.432
Wapl	15524.3	-0.408156	-0.440836	0.130164	-3.13569	0.00171449	0.0832319	15563.4	18294.3	19777.2	13095.7	13617.7	12797.2
RP24-470M22.10	111.845	-0.721377	-1.05261	0.23042	-3.13071	0.00174386	0.0839834	111.857	137.605	203.849	68.7658	84.8534	64.1384
Slc41a1	621.221	0.495753	0.560003	0.158347	3.13081	0.00174327	0.0839834	571.815	458.286	475.223	728.292	678.003	815.708
Prkar1a	5210.62	-0.35105	-0.371074	0.11226	-3.12711	0.00176534	0.0846802	5859.54	5949.34	5822.43	4501.03	4813.58	4317.83
Filip1	441.526	-0.590744	-0.717018	0.189165	-3.12291	0.00179074	0.0853914	401.792	644.951	601.354	326.116	360.009	314.936
Rai1	2171.15	0.39927	0.429936	0.127876	3.12232	0.00179429	0.0853914	1985.69	1712.29	1851.2	2471.4	2351.18	2655.16
Bcas2	1034.63	-0.394026	-0.42353	0.126485	-3.11521	0.00183815	0.0855632	1184.79	1129.56	1242.2	866.866	888.077	896.292
Gm3854	143.405	-0.693949	-0.963115	0.222729	-3.11566	0.00183532	0.0855632	161.075	254.869	152.887	98.981	110.392	82.2287
Phf14	6002.06	-0.37393	-0.398703	0.119935	-3.11777	0.00182226	0.0855632	6210.32	7157.88	7111.78	5020.94	5370.48	5140.94
Rgs5	1663.93	0.439063	0.48142	0.140728	3.11995	0.00180885	0.0855632	1370.03	1271.95	1525.04	1913.98	1762.15	2140.41
Snx12	3786.93	0.392304	0.42139	0.125946	3.11485	0.00184037	0.0855632	3305.61	3523.9	2883.19	4336.41	4326.7	4345.78
Snx8	129.873	0.692005	0.956566	0.221997	3.11718	0.00182593	0.0855632	111.857	69.401	82.8136	187.543	189.478	138.144
Matr3	9113.88	-0.360615	-0.382701	0.115861	-3.11247	0.00185527	0.0859252	9875.67	11131.7	9940.18	7798.66	7706.01	8231.09
Cdkn1c	2177.86	-0.41939	-0.456278	0.135447	-3.09634	0.00195926	0.0888586	2825.07	2233.99	2498.42	1775.41	1903.85	1830.41
Fam53b	288.026	0.586708	0.712616	0.189466	3.09664	0.00195726	0.0888586	263.983	220.169	169.449	362.583	374.014	337.96
Gm37521	111.652	-0.760834	-1.82568	0.24585	-3.09471	0.00197006	0.0888586	47.4275	134.016	341.447	41.6762	50.253	55.0932
Rn18s-rs5	3095.3	0.760805	1.84019	0.245574	3.09807	0.00194786	0.0888586	2366.01	715.548	972.104	5042.82	5816.99	3658.35
Sub1	8423.37	-0.324708	-0.340589	0.104756	-3.09967	0.00193736	0.0888586	9681.48	9335.63	9221.61	7414.2	7412.73	7474.59
Tardbp	13330.1	-0.331201	-0.348144	0.106907	-3.09802	0.00194819	0.0888586	14629.2	14988.2	15175.3	11744.4	12191.7	11252.2
Zbtb10	5127.73	-0.383014	-0.41028	0.123755	-3.09493	0.00196859	0.0888586	5576.76	6276	5703.95	4235.35	4787.21	4187.08
Fbxw5	543.309	0.68616	0.950111	0.222426	3.08489	0.00203626	0.0911064	569.13	303.929	236.974	692.867	808.167	648.784
Spag9	6282.66	-0.329421	-0.346241	0.106817	-3.08398	0.00204251	0.0911064	6893.1	7132.75	7073.55	5459.59	5708.24	5428.74
Tulp3	1169.62	0.451747	0.499748	0.14638	3.08612	0.00202787	0.0911064	924.39	1072.13	910.95	1360.73	1226.67	1522.87
Cand1	7961.18	-0.363871	-0.387308	0.118468	-3.07147	0.00213007	0.0946627	9428.24	8918.03	8723.46	6888.04	7415.2	6394.1
Gm37254	448.706	-0.522895	-0.605285	0.170308	-3.07029	0.00213853	0.0946907	439.376	571.96	614.095	353.206	364.128	349.472
Meis3	321.275	0.613926	0.771017	0.200076	3.06846	0.00215165	0.094924	315.885	178.289	216.589	409.469	404.495	402.92
Znhit6	2156.4	-0.378842	-0.405746	0.12362	-3.06457	0.00217985	0.0958184	2348.11	2346.47	2679.34	1805.62	1872.54	1886.33
Cwc22	6155.32	-0.603658	-0.7507	0.197133	-3.06219	0.00219722	0.0962317	7525.77	7751.37	7887.68	4641.69	2922.91	6202.51
Krt19	194.519	0.747365	1.27178	0.244323	3.05892	0.00222137	0.0965898	181.656	104.101	54.7844	291.734	190.302	344.538
Rab5b	707.291	0.554989	0.659527	0.181395	3.05956	0.00221664	0.0965898	515.439	695.207	434.453	893.955	932.563	772.127
Nbn	1088.03	-0.411783	-0.447568	0.134768	-3.0555	0.00224687	0.0966553	1341.39	1198.96	1225.64	892.913	997.645	871.624
Raver1	3759.45	0.496225	0.564942	0.162397	3.05563	0.00224586	0.0966553	3745.88	2670.74	2679.34	4492.7	4951.15	4016.87
Tgs1	9153.95	-0.383948	-0.412224	0.125581	-3.05737	0.00223285	0.0966553	9421.08	11500.2	10438.3	7916.4	8155.81	7491.85
Alpl	146.516	0.633948	0.819144	0.2077	3.05223	0.00227149	0.096853	128.86	104.101	84.0876	187.543	196.893	177.614
Dcun1d1	3675.56	-0.456141	-0.50719	0.149471	-3.0517	0.0022755	0.096853	3483.69	4853.28	4609.53	3046.53	3123.1	2937.21
Zc3h15	3716.67	-0.351664	-0.372937	0.115234	-3.05174	0.0022752	0.096853	4420.6	4204.74	3957.22	3180.94	3195.6	3340.95
Fam133b	1649.95	-0.381282	-0.409059	0.124988	-3.05054	0.00228431	0.0968867	1734.24	1952.8	1960.77	1418.03	1458.16	1375.69
Fam102b	1726.28	-0.396388	-0.428085	0.130099	-3.04683	0.00231272	0.0977488	2051.91	2115.53	1773.48	1485.76	1505.12	1425.85
Col8a1	99.4142	-0.72097	-1.11358	0.237025	-3.04174	0.00235214	0.0980437	102.909	106.495	198.753	69.8077	60.1388	58.3824
Nrm	392.136	0.532605	0.623045	0.174992	3.04359	0.00233773	0.0980437	355.259	245.297	324.884	475.109	475.344	476.926
Ppp1r13l	103.222	0.706854	1.04602	0.232268	3.04327	0.00234025	0.0980437	89.4859	44.273	67.5249	144.825	121.925	151.301
Reep6	291.706	0.505998	0.580768	0.166323	3.04226	0.0023481	0.0980437	226.399	258.459	216.589	345.913	346.828	356.05
Cbx1	4154.37	-0.351941	-0.37345	0.115756	-3.04037	0.00236289	0.0981534	4936.04	4713.28	4417.15	3597.7	3759.09	3502.94
Acsl3	3730.24	-0.342576	-0.362323	0.112787	-3.03737	0.00238648	0.0984063	4425.97	4071.92	4089.72	3324.72	3198.07	3271.06
Eif3e	3459.05	-0.340442	-0.359801	0.112104	-3.03685	0.00239066	0.0984063	3720.82	3946.28	3997.99	3042.36	2949.27	3097.55
Elavl4	313.078	-0.661412	-0.895031	0.21802	-3.03373	0.00241551	0.0984063	253.245	461.876	507.074	232.345	242.203	181.725
Spns2	168.499	0.677756	0.943144	0.223283	3.03541	0.00240207	0.0984063	163.759	99.3152	81.5395	206.297	228.198	231.885
Trp53i11	453.55	0.601852	0.751297	0.198301	3.03504	0.00240501	0.0984063	452.799	246.493	313.418	548.042	603.86	556.688
Unc13c	287.455	0.69673	1.01163	0.22976	3.03243	0.00242597	0.0984063	122.596	289.57	160.531	352.164	326.232	473.637
Zbtb7a	421.733	0.522042	0.606711	0.172152	3.03245	0.00242575	0.0984063	378.525	327.86	295.581	516.785	569.259	442.39
Nudt11	270.749	-0.512101	-0.591078	0.169023	-3.02978	0.00244736	0.098942	343.626	331.45	300.677	228.177	201.836	218.728
Plekha2	232.385	0.703839	1.04408	0.232607	3.02587	0.00247918	0.0998946	159.285	173.502	122.309	322.991	177.121	439.101
Ctxn1	620.934	0.553948	0.661562	0.183357	3.02115	0.00251815	0.10046	600.45	451.106	389.861	772.052	855.124	657.007
Kdm1b	901.478	-0.423513	-0.463968	0.140154	-3.02177	0.00251303	0.10046	959.289	1167.85	1009.05	753.298	772.743	746.636
Ncl	126239	-0.38471	-0.41394	0.127281	-3.02254	0.00250664	0.10046	124976	153212	154492	107909	109668	107178
Zfp414	203.144	0.602425	0.755325	0.199521	3.01935	0.00253315	0.100726	173.603	112.477	166.901	249.015	252.089	264.776
Eif3a	64793.1	-0.435253	-0.479842	0.144244	-3.01748	0.0025489	0.100742	61706.8	86668.7	78035.9	54360.4	54068.9	53918.2
Myo5b	215.753	-0.556454	-0.666559	0.18442	-3.01732	0.00255022	0.100742	232.663	291.963	270.1	161.495	182.064	156.234
Ddx6	14114.6	-0.366079	-0.391094	0.121571	-3.01123	0.0026019	0.100809	15353.1	17457.9	15237.7	12120.5	12994.1	11524.3
Ergic2	1912.58	-0.373819	-0.400638	0.124182	-3.01025	0.00261029	0.100809	2306.05	2133.48	2089.45	1589.95	1760.5	1596.06
Hltf	1874.1	-0.362048	-0.386168	0.120229	-3.01132	0.00260112	0.100809	2048.33	2272.28	2049.95	1629.54	1633.63	1610.86
Hnrnpa2b1	46055.6	-0.352773	-0.37489	0.117064	-3.01352	0.00258239	0.100809	47090.2	53417.2	55511.9	40086.3	40563.2	39664.6
Samd10	97.6311	0.700146	1.03706	0.232394	3.01275	0.00258893	0.100809	86.8013	43.0765	61.1547	139.615	123.573	131.566
Tnfaip2	80.0265	0.713959	1.10065	0.236864	3.01422	0.00257645	0.100809	66.2196	52.649	33.1254	96.8972	110.392	120.876
Tomm20	2023.91	-0.36172	-0.385774	0.120137	-3.0109	0.00260478	0.100809	2362.43	2273.48	2242.34	1767.07	1848.65	1649.51
Arl8a	199.942	0.602737	0.757897	0.200396	3.00772	0.00263212	0.101328	178.077	151.964	114.665	259.435	266.917	228.596
Pfkp	2165.49	0.595426	0.742866	0.198112	3.0055	0.00265146	0.101749	1843.41	1313.83	1702.14	2692.28	1869.25	3572.01
Aplnr	1121.7	0.462887	0.518987	0.154275	3.0004	0.00269622	0.10249	1027.3	985.973	751.693	1314.89	1377.43	1272.9
Eml4	6148.16	-0.34295	-0.363306	0.114265	-3.00137	0.00268769	0.10249	6660.44	7101.64	6993.29	5287.67	5724.72	5121.2
Pax2	147.808	0.647979	0.867798	0.215897	3.00133	0.002688	0.10249	127.07	74.1873	112.117	183.375	178.769	211.328
Cmpk1	1231.61	-0.363282	-0.387964	0.121263	-2.99581	0.00273713	0.10291	1374.5	1439.47	1374.71	1078.37	1040.48	1082.13
Hspg2	4234.66	0.410248	0.447309	0.136961	2.99535	0.0027413	0.10291	3956.17	3073.99	3718.97	4905.29	4636.46	5117.09
Prune	432.494	0.551433	0.659814	0.184083	2.99557	0.00273934	0.10291	425.058	305.125	273.922	552.21	497.587	541.065
Sdpr	159.122	-0.589263	-0.731459	0.19656	-2.99788	0.00271863	0.10291	193.29	211.793	191.108	108.358	111.216	138.966
Gm21967	278.172	-0.700487	-1.05298	0.234219	-2.99073	0.00278309	0.104155	235.348	461.876	429.357	191.711	240.555	110.186
Cd81	2107.41	0.479062	0.543649	0.160761	2.97996	0.00288283	0.105599	2123.5	1537.59	1481.73	2553.71	2333.06	2614.87
Dbf4	2855.69	-0.342489	-0.363032	0.114796	-2.98347	0.00285005	0.105599	3115	3403.04	3121.44	2519.33	2460.75	2514.55
Dhx9	41068.8	-0.587104	-0.729598	0.19692	-2.98144	0.00286898	0.105599	34135.3	72251.2	47327.3	30641.4	30789.4	31268.3
Gse1	355.992	0.528647	0.621913	0.17738	2.98032	0.00287951	0.105599	337.362	248.886	253.537	461.564	433.329	401.276
Hist1h2bm	240.873	0.681309	0.980182	0.228577	2.98065	0.00287635	0.105599	246.981	106.495	131.228	325.075	353.418	282.044
Nek3	327.17	-0.530807	-0.625387	0.178	-2.98206	0.00286314	0.105599	374.946	451.106	365.654	219.842	289.161	262.309
Tmem63a	78.3605	0.683127	0.98647	0.228821	2.98542	0.00283188	0.105599	54.5864	41.8799	61.1547	112.526	107.92	92.0961
Gm37818	147.224	-0.664428	-0.926088	0.22348	-2.97309	0.00294815	0.107665	138.703	259.655	180.916	95.8553	94.7392	113.476
Gal3st3	119.062	0.622059	0.809898	0.209376	2.97101	0.00296824	0.108073	81.4322	78.9735	99.3763	154.202	135.93	164.457
C330027C09Rik	4585.68	-0.425095	-0.467872	0.143195	-2.96866	0.00299106	0.108576	4747.23	6274.81	4947.16	3790.45	3698.13	4056.34
Acbd5	1813.91	-0.368502	-0.395104	0.124508	-2.95967	0.00307973	0.109536	2032.23	2192.11	1958.22	1519.1	1519.95	1661.84
Ankrd10	2550.67	-0.34374	-0.364882	0.116084	-2.96113	0.00306509	0.109536	2969.14	2798.77	2846.24	2221.34	2333.88	2134.66
Atg3	1042.6	-0.397073	-0.431253	0.134208	-2.95864	0.00308999	0.109536	1117.68	1187	1288.07	866.866	942.449	853.534
Chordc1	4181.27	-0.395869	-0.429671	0.133755	-2.95967	0.00307973	0.109536	4238.95	5340.29	4819.75	3597.7	3740.14	3350.82
Gm16059	573.227	0.435468	0.482281	0.147036	2.96165	0.00305998	0.109536	432.217	514.525	489.237	647.023	663.175	693.188
Gmnn	540.225	-0.486576	-0.555869	0.164142	-2.96436	0.00303309	0.109536	724.836	676.061	527.459	428.223	435.8	448.969
Myl9	561.178	0.522068	0.612768	0.176425	2.95915	0.0030849	0.109536	536.915	345.808	447.193	713.705	649.17	674.275
RP24-466N11.9	307.705	0.625377	0.819671	0.211203	2.96102	0.00306618	0.109536	287.25	203.417	175.82	404.259	477.815	297.668
Rpl18a	3284.11	0.62163	0.811177	0.210175	2.95768	0.00309961	0.109556	3607.18	1974.34	1569.64	4114.49	4362.12	4076.9
H2afz	9915.79	0.394061	0.427464	0.133349	2.95512	0.00312552	0.11015	8920.85	8914.44	7536.04	11462	12377.1	10284.3
Atad2	12424.5	-0.439905	-0.488669	0.148909	-2.95419	0.00313496	0.110161	12738.3	17668.5	13120.2	10258.6	10231.8	10529.4
Gm12705	82.7882	-0.669494	-0.952426	0.226768	-2.95234	0.00315379	0.110301	99.3294	93.3324	135.05	56.2629	54.3721	58.3824
Sephs1	7063.96	-0.35129	-0.374151	0.119001	-2.952	0.0031572	0.110301	7379.9	8331.71	8213.83	6167.04	6475.22	5816.03
0610009O20Rik	784.712	0.575362	0.711131	0.195251	2.94677	0.00321107	0.111012	819.691	503.756	459.934	1021.07	1009.18	894.648
Actr3	6778.56	-0.375892	-0.40481	0.127967	-2.93742	0.00330954	0.111012	8484.16	7491.72	7193.32	5732.57	6312.93	5456.69
Bsdc1	553.622	0.453433	0.508617	0.154504	2.93476	0.00333801	0.111012	487.698	392.475	490.511	652.233	671.413	627.405
Casp8ap2	17499.3	-0.463534	-0.522967	0.15768	-2.93971	0.00328521	0.111012	16435.9	25117.2	20358.1	14282.4	14945.7	13856.4
Cbarp	106.424	0.724151	1.30108	0.246611	2.93641	0.0033204	0.111012	99.3294	41.8799	42.0438	165.663	97.2107	192.415
Cdc42bpa	8604.5	-0.479842	-0.547407	0.163413	-2.93637	0.00332075	0.111012	7634.04	11225	11795.2	6988.06	7085.67	6898.99
Cnr1	507.804	-0.435384	-0.483015	0.14809	-2.94001	0.00328204	0.111012	543.18	610.25	623.013	440.726	425.091	404.565
Far1	3403.66	-0.364116	-0.390287	0.124265	-2.93016	0.00338784	0.111012	3468.47	4159.27	3957.22	2922.55	2947.63	2966.81
Iglon5	101.713	0.659439	0.928212	0.225086	2.92972	0.0033927	0.111012	84.1168	70.5976	54.7844	140.657	149.935	110.186
Mmadhc	947.768	-0.513093	-0.599741	0.174678	-2.93737	0.00331006	0.111012	1411.19	912.982	1100.78	751.214	827.938	682.498
Myom1	2295.99	-0.401057	-0.437264	0.136915	-2.92924	0.00339794	0.111012	2479.65	2407.5	3037.35	1992.12	1927.74	1931.55
Nab2	214.072	0.718104	1.20624	0.243644	2.94734	0.00320516	0.111012	222.82	102.905	61.1547	300.069	271.037	326.448
Ncor2	2478.39	0.508777	0.592813	0.173296	2.93589	0.00332597	0.111012	2572.72	1721.86	1632.06	2923.59	3168.41	2851.69
Neurl1b	202.726	-0.616582	-0.804878	0.210212	-2.93314	0.00335553	0.111012	312.306	211.793	248.441	181.292	116.982	145.545
Nkx2-9	159.796	0.580199	0.722613	0.197493	2.93782	0.00330527	0.111012	129.755	124.443	107.021	211.507	212.545	173.502
Ppp2ca	4026.65	-0.335682	-0.355572	0.114182	-2.93989	0.00328328	0.111012	4748.12	4312.43	4499.96	3514.35	3661.88	3423.18
Ptpn2	1074.09	-0.423723	-0.467355	0.144541	-2.9315	0.00337328	0.111012	1146.31	1332.98	1261.31	854.363	1014.12	835.443
Rbl1	1224.35	-0.358398	-0.383239	0.122317	-2.93008	0.00338869	0.111012	1325.29	1401.18	1432.04	1073.16	1050.37	1064.04
Rnf220	1811.77	0.540405	0.646375	0.183933	2.93805	0.00330284	0.111012	1915.89	1185.8	1133.91	2160.91	2245.73	2228.4
Sema3c	1337.07	-0.561499	-0.686164	0.191529	-2.93167	0.0033715	0.111012	1260.86	2257.93	1429.49	975.224	1123.69	975.232
Sirt1	2603.23	-0.414141	-0.453967	0.14055	-2.94658	0.00321307	0.111012	2730.22	3386.29	2912.49	2197.38	2395.67	1997.33
Snrpa	690.353	0.662053	0.9344	0.225656	2.9339	0.00334737	0.111012	745.418	287.177	388.587	927.296	1010	783.639
Thap1	252.952	-0.512253	-0.598848	0.174735	-2.93161	0.00337211	0.111012	329.308	301.535	282.84	203.172	217.488	183.37
Zzz3	6766.34	-0.331489	-0.350604	0.112803	-2.93867	0.00329625	0.111012	7349.48	7814.79	7589.55	5982.62	6249.49	5612.11
Myrf	1422.41	0.461854	0.52109	0.157719	2.92834	0.00340774	0.111032	1424.62	1036.23	1042.18	1638.92	1631.16	1761.34
Emc10	286.558	0.583999	0.732001	0.1995	2.92731	0.00341904	0.1111	268.458	185.468	191.108	353.206	422.619	298.49
Zfp574	878.276	0.599721	0.766505	0.204957	2.92608	0.00343258	0.111241	938.707	513.328	496.882	1141.93	1190.42	988.389
Stra13	253.026	0.58166	0.727526	0.198849	2.92513	0.00344315	0.111286	208.502	223.758	138.872	288.608	314.699	343.716
Grik5	490.415	0.436631	0.485444	0.149359	2.92336	0.00346274	0.11162	391.948	418.799	415.342	612.641	577.497	526.263
Pmf1	465.008	0.556152	0.677397	0.190456	2.92011	0.00349909	0.112492	465.327	336.236	270.1	579.3	561.021	578.068
Rapgef4	133.984	-0.601743	-0.772971	0.206197	-2.9183	0.00351951	0.112848	151.231	161.537	194.93	89.6039	111.216	95.3853
Gm5138	907.365	0.569651	0.704299	0.195353	2.91601	0.00354544	0.113379	953.92	551.618	563.132	1110.67	1028.13	1236.72
Hspa4l	2376.94	-0.505016	-0.588725	0.173491	-2.91091	0.00360376	0.11494	2100.23	2991.42	3475.62	1868.14	1821.46	2004.73
Cebpz	4728.63	-0.341254	-0.362794	0.117418	-2.90631	0.00365714	0.115996	5607.19	4988.5	5363.77	4186.38	4297.04	3928.89
Cntrl	3374.16	-0.348735	-0.371853	0.119964	-2.907	0.00364917	0.115996	3516.8	3839.79	4064.24	2960.05	2850.41	3013.68
Col11a1	1244.26	-0.588627	-0.746184	0.202698	-2.90396	0.00368472	0.115996	1101.57	1334.17	2242.34	939.799	885.606	962.075
Gm4673	394.652	0.465241	0.527471	0.16021	2.90395	0.00368485	0.115996	314.096	291.963	364.38	454.271	462.163	481.038
Zfp202	324.507	-0.461479	-0.521831	0.158872	-2.90473	0.00367571	0.115996	368.682	379.312	400.053	261.518	280.922	256.553
Cln6	121.482	0.626196	0.838473	0.21589	2.90053	0.00372536	0.116966	110.068	77.777	72.6211	157.328	146.64	164.457
Gm7507	103.502	0.702107	1.15372	0.242246	2.89832	0.00375169	0.117185	100.224	47.8628	43.3179	148.993	114.511	166.102
Pak1ip1	568.723	-0.410607	-0.450849	0.141656	-2.89862	0.00374807	0.117185	652.352	673.668	644.672	476.151	511.592	453.902
Ap4s1	272.924	-0.55449	-0.677592	0.191462	-2.89607	0.00377862	0.117419	308.726	283.587	415.342	232.345	204.307	193.237
Phykpl	3793.45	-0.31759	-0.334772	0.109633	-2.89685	0.00376935	0.117419	4170.04	4162.86	4362.37	3323.68	3441.92	3299.84
Arhgdia	3487.11	0.593823	0.759954	0.20529	2.8926	0.00382065	0.1177	3820.15	1729.04	2216.86	4392.67	4404.96	4358.94
Asun	2064.83	-0.338842	-0.360154	0.117225	-2.89052	0.0038461	0.1177	2198.67	2411.09	2354.45	1833.75	1814.87	1776.14
Fhl2	268.486	-0.484366	-0.55729	0.167545	-2.89095	0.00384073	0.1177	331.993	291.963	335.077	215.674	215.017	221.195
Rdx	15558.2	-0.342615	-0.364677	0.11845	-2.89248	0.00382217	0.1177	16053.8	19036.2	17453.3	13656.3	13274.2	13875.3
Tecrl	673.124	0.597872	0.769596	0.206733	2.892	0.00382793	0.1177	350.785	720.334	422.986	864.782	844.415	835.443
Zfx	4323.5	-0.426851	-0.473127	0.147586	-2.89221	0.00382538	0.1177	4655.95	5866.78	4556.02	3631.04	3977.4	3253.79
Abcd2	265.734	-0.55317	-0.67584	0.191433	-2.88963	0.00385695	0.117734	326.624	311.108	342.721	215.674	157.349	240.93
Gm37277	143.528	-0.636304	-0.871347	0.220294	-2.88844	0.00387164	0.117841	127.07	220.169	210.219	97.9391	107.92	97.8521
Proser3	769.601	0.462575	0.524421	0.160228	2.88697	0.00388968	0.117841	651.457	631.788	610.272	889.787	765.328	1068.97
Slc30a5	804.438	-0.404854	-0.443564	0.140201	-2.88768	0.00388097	0.117841	881.436	875.888	1024.34	711.622	664.822	668.519
Glb1	158.927	0.624284	0.837634	0.216331	2.88577	0.00390453	0.117995	134.229	124.443	82.8136	186.501	243.851	181.725
Commd6	383.397	0.465835	0.529489	0.161592	2.88279	0.00394168	0.118821	348.995	306.322	285.388	427.181	454.748	477.749
Anapc11	149.963	0.64286	0.894185	0.22311	2.88137	0.00395955	0.119062	119.016	68.2044	127.406	180.25	179.593	225.307
Tmem63b	684.253	0.555676	0.682213	0.193109	2.87753	0.00400804	0.120221	715.887	455.893	402.601	824.147	841.12	865.868
Alkbh6	158.23	0.620043	0.832462	0.21646	2.86447	0.00417702	0.120546	137.808	114.871	87.9098	202.13	242.203	164.457
Atg9a	149.387	0.605532	0.793201	0.211066	2.86892	0.00411873	0.120546	140.493	90.9392	95.5541	179.208	196.069	194.06
Cenpj	2191.88	-0.421258	-0.466096	0.146489	-2.8757	0.00403133	0.120546	2172.72	2968.69	2488.23	1840.01	1899.73	1781.9
Chd1	21161.4	-0.338898	-0.36068	0.118356	-2.86338	0.00419145	0.120546	23865	24309.5	23204.4	18488.6	20137.4	16963.8
Cul3	15981.2	-0.34537	-0.368602	0.120738	-2.8605	0.00422974	0.120546	17592.9	19724.2	16718.2	13911.5	14580	13360.5
Cyb5r3	2231.27	0.640499	0.892226	0.223483	2.86598	0.00415714	0.120546	2513.66	909.392	1262.59	2894.41	2966.57	2841
Esf1	13714.7	-0.484518	-0.559188	0.168989	-2.86716	0.00414171	0.120546	12095.8	19983.9	16941.1	11056.7	11555.7	10655.2
Fam103a1	626.332	-0.525549	-0.628468	0.183862	-2.85838	0.00425809	0.120546	954.815	570.763	755.515	483.444	513.239	480.215
Fam98b	4080.2	-0.635289	-0.87557	0.221586	-2.86701	0.00414375	0.120546	2585.25	7137.53	6123.11	2927.76	2691.42	3016.15
Glrx	218.733	0.559304	0.691887	0.195522	2.86058	0.00422872	0.120546	203.133	165.127	132.502	255.267	271.86	284.511
Igf2	70539.4	0.362301	0.389517	0.126659	2.86044	0.00423058	0.120546	55168.1	68435.4	59620.7	79946.5	76765.1	83300.9
Igfbp2	108.966	0.712188	1.45807	0.248412	2.86697	0.00414429	0.120546	85.0116	23.9314	64.9768	177.124	81.5581	221.195
Malt1	835.255	-0.393766	-0.429576	0.137317	-2.86757	0.00413641	0.120546	900.228	1026.66	949.171	758.507	687.889	689.076
Naaladl2	333.379	-0.653078	-0.937458	0.22821	-2.86174	0.00421317	0.120546	262.194	670.079	382.217	243.806	220.784	221.195
Npr3	2003.26	-0.35555	-0.380881	0.123796	-2.87206	0.00407808	0.120546	2168.24	2421.86	2209.21	1663.92	1717.66	1838.63
Otx2	314.855	0.698048	1.16141	0.243058	2.87194	0.00407962	0.120546	251.455	69.401	262.455	417.804	412.733	475.282
Pfkl	1003.84	0.687709	1.10353	0.240567	2.8587	0.00425382	0.120546	1174.95	379.312	356.735	1312.8	1421.09	1378.15
Prpf4b	9830.68	-0.332493	-0.352958	0.116117	-2.86344	0.00419074	0.120546	11156.2	11134.1	10791.2	8670.74	9264.67	7967.14
Ptar1	729.994	-0.450908	-0.508836	0.157775	-2.85792	0.00426426	0.120546	754.366	816.06	1002.68	604.305	639.284	563.266
Rcn2	2926.22	-0.382845	-0.415321	0.1334	-2.86991	0.00410594	0.120546	3725.3	3096.72	3210.62	2472.44	2702.95	2349.27
Rnf7	1850.88	-0.443911	-0.49827	0.154887	-2.86602	0.00415664	0.120546	2169.14	1767.33	2565.95	1522.22	1528.18	1552.48
Snrpa1	1069.32	-0.428135	-0.476333	0.149822	-2.85763	0.00426816	0.120546	1212.53	1074.52	1446.05	907.5	873.249	902.048
Tm9sf3	4536.2	-0.331062	-0.351167	0.115433	-2.86801	0.00413066	0.120546	5180.34	5313.96	4762.42	3835.25	4100.97	4024.27
Trim65	138.012	0.595474	0.770392	0.207978	2.86315	0.0041945	0.120546	112.752	113.674	78.9914	180.25	178.769	163.635
Zfp451	7099.84	-0.341313	-0.363697	0.119406	-2.85841	0.00425767	0.120546	7440.75	8627.26	7902.96	6160.79	6503.23	5964.05
Gm43768	138.557	-0.697399	-1.18329	0.244165	-2.85626	0.00428666	0.120786	89.4859	271.621	216.589	79.1848	71.6723	102.786
Smc2	12835.6	-0.379891	-0.41199	0.133169	-2.8527	0.00433489	0.121861	13015.7	16841.7	14111.4	10926.5	11261.6	10856.7
D930016D06Rik	1752.44	-0.408976	-0.450389	0.143549	-2.84904	0.00438515	0.122988	1742.29	2050.92	2279.28	1494.09	1395.55	1552.48
Dhcr24	1803	0.572269	0.721702	0.201281	2.84314	0.00446715	0.124368	1932.9	1230.07	918.594	2274.48	2342.94	2119.03
Kif21b	1286.56	0.403125	0.442725	0.141805	2.84281	0.00447171	0.124368	1234.01	1074.52	961.912	1490.97	1426.86	1531.1
Klhl23	827.524	-0.362191	-0.389764	0.127391	-2.84315	0.00446699	0.124368	949.446	924.948	941.527	706.412	723.313	719.501
Zhx1	3103.93	-0.393337	-0.42976	0.138375	-2.84254	0.00447552	0.124368	3277.87	4126.97	3284.51	2534.96	2735.08	2664.21
Atg10	125.231	-0.575583	-0.73004	0.202818	-2.83793	0.00454065	0.125388	157.495	151.964	159.257	95.8553	83.2058	103.608
Atp10d	468.564	-0.443053	-0.498443	0.156155	-2.83726	0.00455021	0.125388	601.345	482.217	561.858	402.176	379.781	384.008
Gm10925	177.897	-0.676753	-1.0612	0.238562	-2.8368	0.00455675	0.125388	126.175	338.629	257.359	107.316	140.049	97.8521
Ifrd1	1261.09	-0.482034	-0.557388	0.169866	-2.83773	0.00454353	0.125388	1410.3	1405.97	1689.4	997.104	1240.67	823.109
Mroh2a	838.54	0.434245	0.485848	0.153103	2.83629	0.0045641	0.125388	819.691	636.575	638.302	936.673	991.055	1008.95
Ddx20	1783.63	-0.420685	-0.467085	0.148621	-2.83059	0.00464617	0.126901	2257.73	2099.98	1851.2	1482.63	1697.89	1312.37
Gin1	425.067	-0.532067	-0.643619	0.187982	-2.83042	0.00464875	0.126901	383.895	612.643	559.31	338.619	308.108	347.827
Kdm3a	7432.99	0.505917	0.597266	0.178811	2.82935	0.00466432	0.126901	6196.9	5800.97	5749.81	8908.29	6440.62	11501.3
Prkar2b	1685.55	-0.386865	-0.421683	0.136757	-2.82884	0.00467167	0.126901	2051.02	2032.97	1705.96	1390.94	1384.84	1547.54
Wrnip1	264.434	-0.534673	-0.648364	0.188912	-2.83028	0.00465074	0.126901	371.367	269.228	327.432	213.591	227.374	177.614
Eif5a	7738.05	0.557095	0.692708	0.197106	2.82637	0.00470791	0.127599	8345.46	5321.14	4076.98	9540.73	10339.8	8804.22
Aplp1	81.49	0.694112	1.22201	0.245796	2.82394	0.00474377	0.127712	38.4789	77.777	30.5773	128.154	84.8534	129.099
Ehbp1	1216.57	-0.455353	-0.517246	0.161227	-2.8243	0.00473845	0.127712	1149.89	1694.34	1453.7	1029.4	1009.18	962.898
Smc3	27192.3	-0.398259	-0.436871	0.141028	-2.82398	0.0047432	0.127712	26136.2	35997.6	31702.3	22757.3	23398.1	23162.2
Lmod1	93.8295	0.662529	1.00166	0.234892	2.82057	0.00479384	0.128773	87.6962	45.4696	53.5103	110.442	140.049	125.81
Cd276	1739	0.463768	0.530359	0.164623	2.81716	0.00484505	0.128982	1509.63	1672.8	1085.5	2032.76	2044.72	2088.61
Gmfb	7416.57	-0.355088	-0.38144	0.126002	-2.81811	0.0048307	0.128982	8733.83	8983.84	7455.77	6387.92	6746.26	6191.82
Grik3	448.217	0.42677	0.476182	0.15147	2.81752	0.00483955	0.128982	361.523	388.885	374.572	527.204	556.078	481.038
Hectd3	201.835	0.57838	0.740079	0.205219	2.81835	0.00482707	0.128982	183.446	108.888	160.531	239.638	252.089	266.421
Kdm6a	5423.18	-0.486905	-0.5668	0.172876	-2.8165	0.00485495	0.128982	5598.24	8500.43	5326.83	4256.18	4261.62	4595.76
Psme1	1016.16	0.528152	0.638534	0.187868	2.81129	0.00493426	0.130423	1071.15	699.993	611.547	1225.28	1297.52	1191.49
Tctex1d2	402.172	0.486492	0.566569	0.173034	2.81155	0.00493039	0.130423	320.36	378.116	273.922	487.612	436.624	516.396
Trappc8	3040.88	-0.353178	-0.379222	0.125649	-2.81082	0.00494157	0.130423	3201.81	3389.88	3724.06	2617.27	2810.05	2502.22
Mapk3	810.227	0.481321	0.558321	0.171331	2.8093	0.0049649	0.130469	825.955	581.532	556.762	967.93	937.506	991.678
Mgarp	79.8233	0.694303	1.27059	0.247136	2.8094	0.00496339	0.130469	53.6915	64.6147	21.6589	109.4	84.0296	145.545
Hmox1	247.018	0.64761	0.946455	0.230748	2.80656	0.0050073	0.131013	202.238	173.502	129.954	335.494	192.774	448.146
Zdhhc9	1135.75	0.428463	0.479038	0.152653	2.80678	0.00500397	0.131013	917.231	910.589	1019.24	1347.18	1117.1	1503.14
L1td1	224.347	-0.601378	-0.799945	0.21446	-2.80415	0.00504491	0.131712	191.5	327.86	336.351	163.579	183.712	143.078
Eif2s3x	1978.71	-0.496564	-0.584011	0.177272	-2.80113	0.00509237	0.13238	2847.44	2581	1691.95	1596.2	1626.22	1529.45
Lpar4	613.409	-0.435749	-0.489663	0.155525	-2.8018	0.00508187	0.13238	697.99	814.863	637.028	480.319	546.192	504.062
Mtss1l	1101.16	0.357439	0.384776	0.127644	2.80028	0.0051059	0.132447	1011.19	905.803	947.897	1228.41	1288.45	1225.21
Sox11	33248.7	-0.469614	-0.540703	0.167882	-2.79729	0.00515335	0.133391	29384.5	47942.9	40895.9	26747.8	25697.4	28823.6
Pnp	575.811	0.563215	0.710801	0.201502	2.79509	0.00518858	0.134016	606.715	357.774	343.995	731.418	782.628	632.338
Chrna4	217.106	0.555882	0.695902	0.199062	2.79251	0.00523007	0.134388	173.603	137.605	186.012	257.351	228.198	319.87
Cic	1455.79	0.511805	0.611139	0.183303	2.79212	0.00523632	0.134388	1538.26	1032.64	882.92	1783.74	1770.39	1726.8
Proser2	107.457	0.693615	1.37189	0.248362	2.79275	0.00522613	0.134388	57.271	99.3152	22.933	169.831	102.977	192.415
Col25a1	179.8	-0.601529	-0.804338	0.215558	-2.79057	0.00526152	0.134748	183.446	203.417	299.403	144.825	107.097	140.611
Selt	5938.11	-0.428713	-0.480175	0.153681	-2.78963	0.00527689	0.134856	5505.17	8125.9	7121.97	4993.85	5031.89	4849.85
Ercc6l	2935.33	-0.319978	-0.339209	0.114901	-2.78483	0.00535564	0.135953	3388.83	3222.36	3224.63	2631.85	2683.18	2461.1
Muc2	94.0187	0.69061	1.47321	0.248161	2.78291	0.0053873	0.135953	22.3715	53.8456	73.8952	141.699	66.7294	205.572
Pik3cb	889.589	-0.420371	-0.468623	0.150979	-2.78431	0.00536421	0.135953	909.177	1057.77	1132.64	716.831	827.115	694.01
Prpf38b	10108.7	-0.302251	-0.318259	0.10859	-2.78341	0.00537905	0.135953	10788.4	11584	11285.6	9066.66	9258.91	8668.55
Samd4b	1817.07	0.432322	0.485598	0.155286	2.78404	0.00536866	0.135953	1786.14	1353.32	1401.46	2040.05	2380.01	1941.42
Snhg11	380.728	-0.570673	-0.729493	0.204975	-2.78412	0.0053674	0.135953	427.743	652.13	345.269	274.021	299.046	286.156
Rgma	651.943	0.40405	0.446168	0.145265	2.78147	0.00541127	0.136274	592.397	510.935	551.666	766.843	793.338	696.477
Fgf10	429.789	-0.561068	-0.709623	0.202038	-2.77704	0.00548563	0.137005	365.103	666.489	569.503	320.907	294.104	362.628
Flnb	4317.65	0.344213	0.368796	0.123931	2.77746	0.00547851	0.137005	4127.99	3657.91	3518.94	4857.36	4641.4	5102.29
Gli2	1342.67	0.392181	0.430316	0.141204	2.77742	0.00547929	0.137005	1265.33	993.152	1172.13	1571.19	1469.69	1584.55
Ly6e	564.681	0.502847	0.596948	0.181009	2.77802	0.00546907	0.137005	486.803	351.791	509.622	680.364	584.088	775.416
Cdv3	10606.4	-0.353913	-0.380952	0.127584	-2.77397	0.00553767	0.138019	13215.3	11282.4	11497.1	9350.06	9833.11	8460.51
Luzp2	81.0471	-0.647759	-0.969211	0.233676	-2.77203	0.00557073	0.138395	87.6962	114.871	119.761	47.9277	45.3101	70.7167
Tnc	1885.56	0.409596	0.454144	0.147776	2.77175	0.00557566	0.138395	1612.54	1835.54	1325.02	2199.46	2192.18	2148.64
Gm4654	538.139	0.611483	0.838461	0.220672	2.77101	0.00558832	0.138426	590.607	277.604	287.936	792.89	612.098	667.697
Mark4	197.572	0.617287	0.85694	0.222904	2.76929	0.00561785	0.138796	204.028	102.905	113.391	249.015	277.627	238.463
Wdr12	1963.85	-0.346592	-0.371925	0.125178	-2.7688	0.00562626	0.138796	2251.47	2348.86	2046.13	1707.68	1790.98	1638
Acap2	2539.22	-0.357298	-0.385375	0.129124	-2.76709	0.00565597	0.139245	2672.94	3140.99	2815.66	2222.38	2052.96	2330.36
Iars2	2660.61	-0.393399	-0.43234	0.142229	-2.76596	0.00567558	0.139356	2589.72	3103.9	3476.9	2204.67	2283.63	2304.87
Nes	6268.36	-0.341612	-0.365867	0.123615	-2.76352	0.00571812	0.139356	7471.18	6296.35	7408.63	5614.83	5503.94	5315.26
Sorbs3	406.35	0.451464	0.514967	0.163312	2.76443	0.00570228	0.139356	344.521	312.304	346.543	510.534	415.205	508.995
Vps13a	2695.42	-0.460578	-0.528923	0.166642	-2.76388	0.00571185	0.139356	2395.54	3712.95	3445.05	2159.87	2126.28	2332.83
Zfhx2	645.587	0.441113	0.499416	0.159539	2.76493	0.00569346	0.139356	603.135	442.73	558.036	769.968	776.038	723.612
Dazap1	660.52	0.482124	0.563535	0.17465	2.76052	0.00577097	0.139519	596.871	403.244	598.806	774.136	755.442	834.621
Dhx36	4858.4	-0.354333	-0.381779	0.128334	-2.76102	0.00576219	0.139519	4893.98	6066.6	5533.22	4119.7	4375.3	4161.59
Gm28609	82.4861	0.610609	0.840425	0.221156	2.76098	0.00576276	0.139519	63.535	55.0422	58.6065	102.107	100.506	115.12
Tst	128.437	0.635422	0.92366	0.230045	2.76217	0.00574191	0.139519	124.385	71.7941	68.799	158.37	145.816	201.46
Ccnl1	4235.1	-0.384159	-0.420252	0.139204	-2.75969	0.00578565	0.139595	4068.03	5221.83	5254.2	3709.18	3626.45	3530.9
Slc4a1ap	1741.12	-0.351153	-0.377844	0.127305	-2.75836	0.00580913	0.139882	2051.91	1858.27	1992.62	1561.82	1588.32	1393.78
Cntfr	626.468	0.470989	0.545996	0.171018	2.75403	0.00588666	0.140164	570.025	405.637	551.666	746.004	671.413	814.064
Fmr1	7782.77	-0.353081	-0.380385	0.128245	-2.75318	0.00590202	0.140164	7737.85	8937.17	9735.06	6735.92	6700.12	6850.47
Gm24270	3638.88	0.414165	0.461192	0.150341	2.75485	0.00587195	0.140164	3211.65	2512.79	3461.61	4469.78	4316.81	3860.64
Prkag2	319.962	-0.45405	-0.519542	0.164918	-2.75319	0.00590181	0.140164	410.74	380.509	338.899	271.937	252.089	265.599
Synpo2	1254.33	-0.407265	-0.451606	0.147853	-2.75454	0.00587752	0.140164	1629.54	1228.88	1488.1	1041.91	1114.63	1022.92
Usp7	8166.06	-0.301703	-0.317976	0.109487	-2.7556	0.00585848	0.140164	9425.55	8847.43	8913.29	7368.36	7474.51	6967.23
Zic4	151.384	-0.629384	-0.904547	0.228363	-2.75606	0.00585016	0.140164	133.334	205.81	253.537	100.023	85.6772	129.921
Zgrf1	3322	-0.390543	-0.429029	0.141967	-2.75095	0.00594224	0.140843	3260.87	3869.7	4307.58	2905.88	2950.1	2637.9
Fancm	3530.61	-0.327034	-0.348348	0.119077	-2.74641	0.00602511	0.141972	3668.92	4221.5	3975.05	3038.2	3204.66	3075.35
Lypd6	273.204	-0.54328	-0.677066	0.197796	-2.74667	0.00602031	0.141972	326.624	281.194	401.327	178.166	255.384	196.527
Ss18	2305.08	-0.307682	-0.325133	0.111979	-2.74769	0.00600172	0.141972	2607.62	2578.61	2504.79	2023.38	2059.55	2056.54
Smtnl2	762.46	0.559169	0.711526	0.20378	2.74399	0.00606982	0.142747	798.214	501.362	433.179	957.511	781.805	1102.69
Hand2	174.159	0.533254	0.657818	0.194443	2.74247	0.0060979	0.142977	119.911	125.64	160.531	212.549	205.131	221.195
Kdelr1	627.726	0.397025	0.438097	0.144785	2.74218	0.00610327	0.142977	499.331	570.763	530.007	709.538	682.122	774.594
Lbp	245.814	0.611525	0.850217	0.223105	2.74098	0.00612562	0.143223	200.448	148.375	177.094	294.859	210.898	443.213
Iws1	9489.38	-0.317887	-0.337447	0.116101	-2.73802	0.00618111	0.143411	10341.9	11217.8	10223	8268.56	8925.26	7959.73
Klf10	560.539	-0.447052	-0.509823	0.163202	-2.73925	0.0061579	0.143411	562.866	743.069	670.153	494.905	474.52	417.722
Pnn	15016.1	-0.456003	-0.523509	0.166503	-2.73871	0.00616804	0.143411	13016.6	20772.4	19345.3	12288.2	12516.3	12157.5
Sepn1	772.348	0.517629	0.627894	0.189042	2.73817	0.00617827	0.143411	817.901	479.824	521.089	930.422	977.05	907.804
Purb	10176.3	-0.433891	-0.490382	0.158615	-2.7355	0.00622847	0.144233	9310.11	14338.5	12020.7	8332.12	8692.12	8364.3
Dyrk1b	161.948	0.523618	0.639963	0.191525	2.73393	0.00625825	0.144646	136.019	113.674	129.954	185.459	200.188	206.394
Dek	33540.5	-0.38627	-0.423935	0.141361	-2.73252	0.00628528	0.144993	31630.6	42836	40834.7	28634.7	29309	27998
6030400A10Rik	100.794	-0.673149	-1.20312	0.246447	-2.73142	0.00630623	0.145199	81.4322	172.306	168.175	63.5562	34.6004	84.6955
Mboat7	571.272	0.398549	0.440636	0.146029	2.72924	0.00634806	0.145885	524.387	454.696	473.949	693.909	653.289	627.405
Zfp407	2862.63	-0.404793	-0.449361	0.148496	-2.72595	0.00641165	0.147066	2726.64	3424.58	3764.83	2406.8	2548.9	2304.05
Dcakd	1643.21	0.652775	1.03684	0.239753	2.72269	0.00647519	0.147183	1710.97	513.328	1005.23	2191.13	3026.71	1411.87
Masp2	83.8064	0.617378	0.879161	0.226763	2.72257	0.00647762	0.147183	51.007	51.4525	75.1693	106.274	111.216	107.72
Plod1	552.075	0.454292	0.521797	0.166743	2.72451	0.00643971	0.147183	509.175	477.431	372.024	685.574	592.326	675.92
Sh3bp1	458.125	0.603286	0.831234	0.221577	2.72269	0.00647532	0.147183	505.595	253.673	228.056	572.006	653.289	536.131
St6galnac5	224.874	-0.52755	-0.649039	0.193672	-2.72393	0.00645098	0.147183	219.24	317.091	287.936	187.543	159.821	177.614
Smc5	8451.86	-0.409447	-0.456027	0.150456	-2.72138	0.00650105	0.147438	7777.22	11142.4	10411.6	7195.4	7106.27	7078.24
Foxo4	162.69	0.54566	0.686621	0.200594	2.72023	0.00652373	0.147676	145.862	107.691	119.761	205.255	218.312	179.258
Gata4	1890.61	0.546525	0.688555	0.20098	2.71929	0.00654217	0.147816	1288.6	2068.87	986.119	2324.49	2253.15	2422.46
Ldha	35336.8	0.571503	0.746132	0.210299	2.71757	0.00657636	0.148312	40666.9	20485.3	18038.1	43967.4	43090.7	45772.6
Dap	266.795	0.578053	0.763833	0.212989	2.71401	0.00664741	0.14853	167.339	262.049	164.353	324.033	268.565	414.432
Kbtbd11	1981.84	0.582581	0.775139	0.2146	2.71473	0.00663296	0.14853	1562.42	1620.15	1202.71	2506.83	1473.81	3525.14
Lifr	2671.84	-0.361023	-0.391445	0.133022	-2.71401	0.00664749	0.14853	3095.32	3224.75	2776.17	2226.55	2553.84	2154.39
Lsr	166.436	0.658443	1.0867	0.242598	2.71413	0.00664494	0.14853	168.234	99.3152	50.9622	196.92	270.213	212.972
Wipi1	350.125	0.493513	0.587047	0.18183	2.71414	0.00664473	0.14853	323.939	299.142	215.315	426.139	415.205	421.011
Bbs2	591.541	0.397853	0.440332	0.146669	2.71259	0.00667604	0.148696	499.331	507.345	499.43	655.359	754.619	633.161
Cd151	403.287	0.471376	0.549845	0.173785	2.71241	0.00667951	0.148696	389.264	269.228	322.336	490.738	472.872	475.282
Zc3h12c	2038.66	-0.323783	-0.345021	0.119411	-2.7115	0.00669786	0.14883	2161.98	2395.53	2286.93	1793.12	1854.42	1739.96
Arhgap27	150.484	0.592879	0.805226	0.218841	2.70918	0.00674497	0.149602	149.441	83.7598	94.2801	188.585	193.598	193.237
Pcnp	2090.93	-0.360523	-0.391034	0.133257	-2.70548	0.00682053	0.151001	2227.3	2679.12	2211.76	1791.04	1874.19	1762.16
Ifitm3	153.271	0.656905	1.09055	0.242966	2.70369	0.00685744	0.151264	151.231	98.1187	43.3179	210.465	223.255	193.237
Zfp580	123.839	0.560972	0.72456	0.207476	2.7038	0.00685524	0.151264	88.5911	86.153	105.747	148.993	140.873	172.68
Arhgap33	225.697	0.565748	0.735654	0.209347	2.70244	0.00688335	0.151559	221.925	166.323	118.487	288.608	273.508	285.333
Dlk1	622.245	0.535928	0.669178	0.198368	2.70169	0.0068989	0.151625	544.074	579.139	317.24	780.387	682.122	830.51
Supt16	27912.1	-0.31278	-0.331928	0.115842	-2.70007	0.00693254	0.151853	30348.3	33944.3	29034.4	24514	24737.6	24893.9
Taok1	15206.4	-0.408942	-0.45625	0.151461	-2.69998	0.00693441	0.151853	14112.8	20770	17891.6	12780	12703.3	12980.6
B4galnt4	442.32	0.553331	0.707388	0.205037	2.69869	0.00696127	0.152059	468.011	245.297	293.033	570.964	570.907	505.706
Car12	433.67	0.571396	0.750688	0.211759	2.69833	0.00696893	0.152059	402.687	223.758	342.721	553.252	411.086	668.519
1700024P16Rik	79.0983	-0.652569	-1.07256	0.242253	-2.69375	0.00706527	0.152289	71.5887	104.101	146.516	43.76	43.6624	64.9606
5033428I22Rik	316.029	0.452184	0.520995	0.168157	2.68906	0.00716545	0.152289	253.245	285.98	239.522	375.086	341.885	400.454
Atp5d	433.403	0.59766	0.82415	0.221726	2.69549	0.00702859	0.152289	482.329	241.707	212.767	573.048	557.726	532.842
Ccdc88a	23545.2	-0.547004	-0.694468	0.203143	-2.69271	0.00708741	0.152289	17425.6	39561	30330.2	17718.6	17339.7	18896.1
Cwf19l2	3304.22	-0.402288	-0.44735	0.149525	-2.69045	0.00713568	0.152289	3069.37	4207.14	4162.34	2737.09	2791.92	2857.45
Lipa	1592.31	0.422627	0.476353	0.157155	2.68923	0.00716165	0.152289	1318.13	1551.95	1124.99	1898.35	2015.89	1644.57
Myh7	5377.26	-0.430665	-0.488121	0.160111	-2.68979	0.00714965	0.152289	7054.17	4911.92	6868.43	4494.78	4051.54	4882.74
Plch1	2589.31	-0.359715	-0.390319	0.13355	-2.69349	0.00707088	0.152289	2559.3	3225.95	3028.43	2207.8	2230.08	2284.31
Ppib	130.395	0.595488	0.818994	0.22119	2.6922	0.00709829	0.152289	119.911	92.1358	70.073	163.579	191.126	145.545
Rmdn2	248.325	-0.608045	-0.860947	0.22613	-2.68891	0.00716848	0.152289	216.556	461.876	282.84	181.292	205.955	141.433
Rps15	2483.66	0.545765	0.691194	0.202472	2.69551	0.00702816	0.152289	2780.33	1344.94	1572.18	3097.59	2968.22	3138.67
Socs4	3518.77	-0.412356	-0.461376	0.153097	-2.69344	0.00707199	0.152289	3514.11	4983.71	3732.98	2931.92	3012.71	2937.21
Tfap2a	1188.65	0.425201	0.479974	0.15795	2.692	0.00710259	0.152289	1001.35	831.615	1145.38	1407.61	1501.82	1244.12
Trdn	523.033	-0.638455	-0.983679	0.236941	-2.69457	0.00704799	0.152289	310.516	1067.34	707.101	319.865	386.371	347.005
Utp6	4531.98	-0.310028	-0.328805	0.11529	-2.68911	0.00716424	0.152289	4868.93	5312.77	4957.35	3987.37	4220.43	3845.01
Usp1	4335.23	-0.369815	-0.403612	0.137626	-2.6871	0.00720749	0.152849	5307.41	5085.42	4419.7	3642.5	4163.58	3392.75
Tax1bp1	8305.54	-0.290749	-0.306037	0.108239	-2.68618	0.00722734	0.153002	8890.43	9525.89	9133.7	7395.45	7659.87	7227.9
Nfu1	215.276	0.505072	0.611441	0.188194	2.68378	0.0072795	0.153837	156.6	165.127	189.834	254.225	229.846	296.023
Dvl3	1255.64	0.341341	0.367361	0.127446	2.67831	0.00739942	0.155735	1067.57	1176.23	1046	1471.17	1384.02	1388.84
Yod1	615.353	-0.483903	-0.574034	0.180701	-2.67792	0.00740798	0.155735	545.864	868.709	795.01	494.905	476.991	510.64
Zfand5	3246.69	-0.375903	-0.411925	0.140346	-2.6784	0.00739738	0.155735	3158.85	3898.42	4065.51	2687.07	2980.58	2689.7
Mmachc	837.663	0.417675	0.469783	0.156014	2.67716	0.00742501	0.155822	717.677	799.308	589.888	985.643	1026.48	906.982
C530008M17Rik	2694.49	-0.302136	-0.319642	0.113048	-2.67263	0.00752583	0.157392	2993.3	3017.75	2964.73	2297.4	2404.73	2489.06
Tex30	468.899	-0.484896	-0.576215	0.181408	-2.67296	0.00751852	0.157392	493.962	680.848	509.622	363.625	329.528	435.812
Hsd17b10	489.494	0.531836	0.665725	0.199142	2.67063	0.00757091	0.157788	517.229	294.356	322.336	593.886	654.936	554.221
Tma16	1992.19	-0.403248	-0.44952	0.150982	-2.67083	0.0075664	0.157788	2339.16	2579.8	1981.16	1618.08	1901.38	1533.56
Pkp4	6353.56	-0.36953	-0.403811	0.138477	-2.66854	0.00761827	0.158502	6366.92	6934.12	8411.31	5365.81	5674.47	5368.71
Fam160b2	631.95	-0.4475	-0.515305	0.167928	-2.66482	0.00770286	0.159441	622.822	884.264	724.937	474.067	543.721	541.887
Hnrnpa3	21333.8	-0.453058	-0.524043	0.170014	-2.66482	0.00770296	0.159441	18879.7	31771.3	24849.2	17428	17173.3	17901.2
Hnrnpm	8752.1	-0.323065	-0.344985	0.121199	-2.66556	0.00768594	0.159441	10669.4	9454.09	9256.01	7748.65	8103.91	7280.53
Ppm1e	1213.71	-0.439531	-0.503061	0.165008	-2.6637	0.00772864	0.159699	1114.1	1478.96	1677.93	982.517	977.05	1051.7
Trappc1	892.156	0.389448	0.430712	0.146246	2.66296	0.00774557	0.159775	842.062	776.573	659.961	1024.19	982.816	1067.33
Mrpl38	266.054	0.567612	0.750696	0.21331	2.66098	0.00779141	0.160153	274.722	172.306	146.516	345.913	365.776	291.089
Pi4k2a	458.671	0.544797	0.695676	0.204742	2.66089	0.00779339	0.160153	495.752	274.014	279.018	565.755	583.264	554.221
Ppme1	435.952	0.513903	0.631013	0.193164	2.66045	0.0078036	0.160153	451.904	305.125	267.552	541.791	496.763	552.577
Mark2	1266.79	0.489067	0.584861	0.183871	2.65984	0.0078177	0.16017	1342.29	777.77	918.594	1503.47	1618.81	1439.82
Tra2b	5148.75	-0.324048	-0.346313	0.121861	-2.65916	0.00783363	0.160225	5254.61	5771.05	6267.08	4433.31	4656.23	4510.24
Hnrnpul1	9714.48	0.315991	0.336517	0.118907	2.65747	0.00787285	0.160638	8868.95	9131.02	7759	10872.3	10988.1	10667.5
Top1	15919.1	-0.391685	-0.434021	0.147408	-2.65715	0.00788042	0.160638	14928	20499.6	19461.2	13307.2	14547	12771.8
Cbfb	6839.78	-0.375466	-0.412114	0.141418	-2.65501	0.00793064	0.160702	7306.53	8957.51	7166.56	5886.77	6419.2	5302.1
Il6st	6653.54	-0.342687	-0.369576	0.129048	-2.65549	0.00791924	0.160702	7327.11	7970.35	7206.06	5795.08	6415.08	5207.54
Mastl	2146.86	-0.33078	-0.35468	0.124546	-2.65589	0.00790993	0.160702	2195.09	2569.03	2465.3	1856.68	1868.42	1926.62
Sntb2	3328.21	-0.532057	-0.668994	0.200417	-2.65475	0.00793672	0.160702	2620.15	5601.14	4038.76	2456.81	2445.92	2806.46
Rtl1	522.871	0.564101	0.745946	0.213263	2.64509	0.00816683	0.164809	498.437	440.337	231.878	651.191	734.847	580.534
Smarcad1	7558.27	-0.363012	-0.395951	0.137211	-2.64565	0.00815348	0.164809	7684.16	10018.9	8064.77	6462.94	6685.29	6433.57
Stc1	927.897	0.628173	1.84268	0.23758	2.64404	0.00819222	0.165046	350.785	522.901	340.173	1472.21	450.629	2430.68
Vcpip1	5448.74	-0.34427	-0.371878	0.130249	-2.64316	0.00821364	0.165202	5367.37	6794.12	6281.09	4774.01	4777.33	4698.55
Prelid2	219.351	0.586761	0.811444	0.222135	2.64146	0.00825499	0.165758	155.705	183.075	138.872	289.65	180.416	368.384
1700007J10Rik	102.644	0.565448	0.751472	0.214224	2.63951	0.00830254	0.16625	83.2219	64.6147	81.5395	119.819	134.283	132.388
Ddr2	1332.35	-0.47588	-0.563943	0.180333	-2.6389	0.0083175	0.16625	1578.53	1360.5	1829.54	1095.04	1308.23	822.287
Rps6ka1	390.547	0.635937	1.02572	0.240998	2.63877	0.00832075	0.16625	437.586	214.186	118.487	545.959	458.044	569.022
Bcl9l	647.467	0.494092	0.596428	0.187309	2.63784	0.00834357	0.166388	646.088	376.919	522.363	753.298	852.653	733.48
Slc44a3	120.702	-0.601566	-0.862757	0.228093	-2.63737	0.0083552	0.166388	112.752	201.024	154.161	71.8915	102.154	82.2287
Acsl4	3665.12	-0.356219	-0.387391	0.135143	-2.63586	0.00839238	0.166854	3702.03	4726.45	4034.93	3265.33	3233.49	3028.48
Lage3	114.774	0.585959	0.811652	0.222433	2.63431	0.00843086	0.166997	102.014	67.0079	80.2655	147.951	170.531	120.876
Nemp2	732.795	-0.500522	-0.608887	0.189982	-2.63458	0.00842415	0.166997	630.876	1123.58	902.031	574.09	546.192	620.004
Skiv2l	1421.42	0.396823	0.442114	0.15066	2.6339	0.00844102	0.166997	1344.97	1006.31	1263.86	1598.28	1551.25	1763.8
Gm11944	264.504	-0.4583	-0.534948	0.174072	-2.63282	0.00846787	0.167254	328.413	336.236	273.922	218.8	225.727	203.927
Haus6	8063.98	-0.372691	-0.409207	0.141639	-2.63127	0.00850671	0.167747	7746.8	10650.7	9203.78	6910.96	6920.08	6951.61
Sltm	11438.7	-0.37765	-0.415938	0.143634	-2.62925	0.00855723	0.168469	10748.2	14885.3	13596.7	9785.58	9640.33	9975.98
Fam83h	104.832	0.616245	0.929884	0.2347	2.62566	0.00864799	0.169187	93.9602	65.8113	56.0584	125.029	180.416	107.72
Gm43817	246.019	-0.528438	-0.6664	0.201264	-2.6256	0.0086497	0.169187	274.722	278.801	352.913	153.16	238.084	178.436
Tmem38b	247.923	-0.466023	-0.548396	0.177478	-2.6258	0.00864448	0.169187	305.147	260.852	317.24	208.381	212.545	183.37
Zfp503	1326.3	0.34219	0.369629	0.130256	2.62705	0.00861285	0.169187	1239.38	1148.71	1082.95	1470.13	1585.85	1430.78
Acvr2a	4525.64	-0.388953	-0.431606	0.148262	-2.62341	0.00870539	0.169319	4244.32	6012.76	5337.02	3824.84	3796.98	3937.93
Bcam	277.361	0.597593	0.854667	0.227737	2.62405	0.00868902	0.169319	289.04	112.477	189.834	369.877	378.133	324.803
Chic2	1011.75	-0.407922	-0.458401	0.155509	-2.62314	0.00871245	0.169319	1022.82	1330.58	1160.66	866.866	756.266	933.295
Nr1d1	110.366	0.619695	0.947725	0.236096	2.62476	0.00867096	0.169319	84.1168	51.4525	90.4579	133.364	109.568	193.237
Entpd5	301.528	0.453512	0.527995	0.172943	2.62232	0.00873333	0.169452	284.565	232.134	222.96	374.044	339.414	356.05
Nudt4	4009.55	-0.325103	-0.348371	0.124044	-2.62087	0.00877068	0.169904	4328.43	4783.88	4362.37	3354.94	3847.24	3380.42
Golim4	4022.2	-0.319012	-0.340886	0.121749	-2.62024	0.00878667	0.169941	4085.93	4591.23	4809.56	3562.28	3635.51	3448.67
Mak16	690.337	-0.363774	-0.397803	0.138953	-2.61795	0.00884586	0.170813	767.789	750.249	837.054	591.802	626.927	568.2
Rpp30	776.727	-0.348302	-0.377686	0.133085	-2.61714	0.00886702	0.170948	879.647	830.419	923.69	659.526	679.651	687.432
Col4a2	2553.29	0.376833	0.415429	0.144243	2.61249	0.00898851	0.171075	2576.3	1989.89	1996.44	2950.68	2783.69	3022.73
Kcnj5	961.031	-0.432919	-0.496101	0.165619	-2.61395	0.00895028	0.171075	1045.2	1013.49	1316.1	755.382	705.189	930.828
Klhl5	722.825	-0.382346	-0.422881	0.146234	-2.61462	0.00893263	0.171075	731.995	871.102	881.646	636.604	583.264	632.338
Lemd3	544.862	-0.481874	-0.577286	0.184483	-2.61202	0.00900094	0.171075	491.278	655.72	811.573	416.762	448.158	445.679
Msmo1	1121.19	0.375969	0.414168	0.143762	2.61522	0.00891692	0.171075	1000.45	983.58	899.483	1278.42	1134.4	1430.78
Ppil4	2114.08	-0.405279	-0.455065	0.155095	-2.61309	0.0089727	0.171075	2757.96	2351.26	2224.5	1691.01	2094.15	1565.63
Thsd7a	262.615	-0.482863	-0.578989	0.184791	-2.61302	0.00897464	0.171075	252.35	345.808	346.543	206.297	210.074	214.617
Wdr83os	257.457	0.585377	0.817851	0.224018	2.61307	0.00897318	0.171075	264.878	180.682	112.117	341.745	349.299	296.023
Zfp324	273.531	0.499748	0.610173	0.191265	2.61285	0.008979	0.171075	265.773	168.716	214.041	333.41	319.642	339.604
Rtf1	8617.17	-0.305598	-0.324744	0.11703	-2.61128	0.00902049	0.171177	9103.4	9909.98	9736.33	7479.84	8226.66	7246.81
Eno1	11370.1	0.451558	0.525887	0.173077	2.609	0.00908071	0.172005	11942.8	7132.75	8883.99	13628.1	12333.4	14299.6
Nid2	3545.21	0.318359	0.340308	0.122044	2.60855	0.00909261	0.172005	3224.18	3313.3	2848.79	3974.87	3819.23	4090.88
Nudt16	179.034	0.606989	0.902442	0.232974	2.6054	0.00917682	0.173327	141.388	166.323	66.2509	199.004	249.617	251.62
Man2a1	3753.55	-0.34877	-0.378669	0.133978	-2.6032	0.0092359	0.174171	3688.61	4293.29	4749.68	3206.99	3284.57	3298.19
Mef2d	1363.01	0.41702	0.472836	0.160316	2.60124	0.0092888	0.174353	1343.18	906.999	1173.4	1601.41	1534.78	1618.26
Pvt1	246.545	-0.545013	-0.709393	0.209486	-2.60167	0.00927703	0.174353	213.871	312.304	392.409	196.92	170.531	193.237
Zfp607a	330.27	-0.422352	-0.480791	0.162328	-2.60185	0.00927235	0.174353	381.21	376.919	396.231	282.356	296.575	248.331
A930033H14Rik	281.256	0.563957	0.75928	0.216977	2.59915	0.00934548	0.174925	161.075	214.186	252.263	368.835	244.674	446.502
Fbxo27	95.1105	0.594526	0.856777	0.228748	2.59905	0.00934825	0.174925	79.6425	72.9907	49.6882	135.448	100.506	132.388
H2-D1	146.71	0.555286	0.736239	0.213775	2.59752	0.00938993	0.175433	126.175	80.1701	123.583	170.873	205.955	173.502
Lysmd3	2003.27	-0.40756	-0.459235	0.156989	-2.5961	0.00942887	0.175776	1871.15	2741.34	2346.81	1725.4	1611.39	1723.51
Stag2	7005.19	-0.36756	-0.403548	0.141598	-2.59579	0.00943734	0.175776	7160.66	9440.93	7334.74	6086.81	5831.82	6176.2
Stab1	385.594	0.499486	0.612095	0.192519	2.59447	0.00947368	0.176181	399.107	260.852	253.537	451.145	444.039	504.884
Bag3	409.928	0.456638	0.535592	0.17616	2.59218	0.00953694	0.176273	409.845	311.108	281.566	494.905	479.463	482.682
Mss51	223.51	-0.495398	-0.60469	0.191099	-2.59237	0.00953181	0.176273	234.453	246.493	328.706	175.04	170.531	185.837
Rc3h2	6571.34	-0.373788	-0.41204	0.14418	-2.59251	0.00952774	0.176273	6156.63	8362.82	7992.15	5677.34	5796.39	5442.72
Trim3	224.231	0.601526	0.88718	0.232031	2.59243	0.00952998	0.176273	249.666	110.084	110.843	301.111	294.104	279.577
Ccdc25	1124.65	-0.351745	-0.382888	0.135826	-2.58967	0.00960672	0.177292	1382.56	1141.53	1294.44	956.469	1005.88	967.009
Zfyve9	2599.83	-0.395638	-0.442514	0.152889	-2.58774	0.00966066	0.178015	2406.28	3430.56	3150.74	2221.34	2127.93	2262.11
Gng3	80.0849	0.587046	0.836603	0.227054	2.58549	0.00972396	0.178637	63.535	50.2559	58.6065	87.5201	117.806	102.786
Ost4	137.683	0.510701	0.635974	0.197486	2.58602	0.00970919	0.178637	112.752	113.674	96.8282	160.453	172.178	170.213
Hnrnpa0	13123.2	-0.352954	-0.384622	0.136569	-2.58445	0.00975354	0.178909	12965.6	16839.3	14782.9	11335.9	12121.7	10693.8
Bvht	86.0952	0.573069	0.792179	0.222006	2.58132	0.00984219	0.179446	67.1144	65.8113	56.0584	97.9391	123.573	106.075
Fhl3	105.761	0.593073	0.860602	0.229723	2.58168	0.00983196	0.179446	90.3808	47.8628	86.6358	147.951	134.283	127.454
Gpd2	2475.63	-0.294248	-0.311611	0.113971	-2.58179	0.00982898	0.179446	2808.96	2719.8	2697.17	2126.53	2286.92	2214.42
Slc12a2	4620.61	-0.336417	-0.363417	0.130302	-2.58183	0.0098278	0.179446	5452.38	5603.53	4542.01	3992.58	3929.62	4203.53
Antxr1	754.347	-0.369574	-0.406783	0.143209	-2.58066	0.00986102	0.179518	778.527	956.059	845.973	657.443	645.874	642.206
Dcaf13	934.451	-0.420938	-0.480037	0.163249	-2.57851	0.00992277	0.17989	1186.58	934.52	1144.1	762.675	904.554	674.275
Fxyd5	105.098	0.630484	1.07501	0.244493	2.57874	0.00991616	0.17989	102.909	64.6147	34.3995	147.951	168.059	112.653
Pkn2	8253.5	-0.35415	-0.386365	0.137353	-2.57839	0.00992608	0.17989	7918.61	10483.1	9656.06	7006.82	7371.54	7084.82
Aldoa	4053.14	0.514844	0.645901	0.199779	2.57707	0.00996414	0.180309	4488.61	2107.16	2884.46	5066.79	4728.72	5043.08
Foxo3	1596.75	0.487933	0.592806	0.189558	2.57406	0.0100514	0.180479	1252.8	1401.18	1165.76	1871.26	1368.36	2521.13
G6pdx	1137.62	0.492743	0.601938	0.191453	2.57371	0.0100616	0.180479	1243.85	688.027	777.174	1421.16	1346.12	1349.37
Pds5a	13070.3	-0.312832	-0.334169	0.121473	-2.57532	0.0100149	0.180479	13177.7	16002.9	14552.3	11556.8	11617.5	11514.5
Psme4	14480.2	-0.282028	-0.29725	0.109517	-2.5752	0.0100183	0.180479	15173.2	16886	15841.6	12896.7	13218.2	12865.5
Rpf2	1634.35	-0.329117	-0.354397	0.127879	-2.57365	0.0100631	0.180479	1821.93	1772.12	1908.53	1404.49	1559.49	1339.5
Six5	473.498	0.419715	0.478387	0.162978	2.57528	0.0100159	0.180479	448.324	332.646	405.15	566.797	542.073	545.998
Senp5	994.957	-0.388115	-0.432559	0.150868	-2.57256	0.0100951	0.180784	1236.7	1175.03	1016.7	832.483	949.864	758.971
Chpf2	87.4361	0.600003	0.894703	0.233321	2.57158	0.0101235	0.180914	79.6425	61.025	42.0438	107.316	127.692	106.897
Pdk2	105.095	0.554729	0.74231	0.21574	2.57128	0.0101323	0.180914	89.4859	64.6147	81.5395	120.861	134.283	139.789
Pik3r1	2673.74	-0.406795	-0.45944	0.158239	-2.57077	0.0101472	0.180914	2469.81	3100.31	3718.97	2273.44	2249.85	2230.04
Rassf8	434.074	-0.404458	-0.456115	0.157467	-2.56853	0.010213	0.181818	525.282	534.866	445.919	358.416	389.667	350.294
Abca3	194.61	0.473727	0.567934	0.184688	2.56502	0.0103171	0.181836	150.336	172.306	147.79	239.638	212.545	245.041
D5Ertd579e	3729.06	-0.332021	-0.358279	0.129478	-2.56431	0.0103381	0.181836	3685.92	4552.94	4331.79	3171.56	3295.28	3336.84
Ddx3x	32954.7	-0.376944	-0.417315	0.146867	-2.56656	0.0102713	0.181836	44156.8	37147.5	31758.4	28284.6	30212.8	26168.5
Dhfr	2637.73	-0.312151	-0.333553	0.121747	-2.56393	0.0103493	0.181836	2849.23	3091.93	2883.19	2296.36	2502.76	2202.91
Gm4275	208.821	-0.552281	-0.737166	0.21521	-2.56625	0.0102805	0.181836	181.656	263.245	338.899	160.453	170.531	138.144
Gm45235	294.62	-0.491659	-0.600745	0.19149	-2.56755	0.0102421	0.181836	294.409	437.944	333.802	205.255	253.736	242.575
Phf20l1	3297.3	-0.413181	-0.469212	0.161102	-2.56471	0.0103261	0.181836	2952.14	4512.26	4023.47	2697.49	2829.82	2768.64
Rora	969.262	0.619553	1.00795	0.241621	2.56416	0.0103427	0.181836	506.49	812.47	612.821	1279.46	520.654	2083.67
Tmem28	166.709	0.565699	0.774972	0.220459	2.566	0.0102878	0.181836	149.441	102.905	115.939	210.465	266.094	155.412
Wiz	874.763	0.510218	0.638617	0.199117	2.5624	0.010395	0.182252	951.235	567.174	532.555	1049.2	1206.07	942.341
Zfp687	805.292	0.583509	0.834466	0.227744	2.56213	0.0104032	0.182252	893.964	538.456	301.951	1023.15	1110.51	963.72
Gm28285	152.643	-0.599025	-0.898006	0.233925	-2.56076	0.0104444	0.182508	138.703	254.869	202.575	122.945	127.692	69.0721
Gm37726	351.953	-0.608432	-0.94383	0.237609	-2.56064	0.010448	0.182508	203.133	558.798	628.109	254.225	211.722	255.731
9430091E24Rik	170.64	-0.534534	-0.694981	0.209226	-2.55482	0.0106242	0.182526	166.444	268.031	198.753	135.448	135.93	119.232
Arl3	349.741	0.407151	0.460635	0.159152	2.55825	0.01052	0.182526	300.673	289.57	293.033	374.044	402.848	438.279
Bmf	538.556	0.542401	0.714768	0.212506	2.5524	0.0106983	0.182526	591.502	341.022	289.211	652.233	762.033	595.336
Camsap3	652.312	0.422409	0.483979	0.165506	2.55223	0.0107037	0.182526	519.018	455.893	657.413	776.22	733.199	772.127
Dag1	5877.81	0.376607	0.417316	0.147419	2.55466	0.010629	0.182526	5983.03	4249.02	4866.89	6772.39	6906.9	6488.66
Fam162a	675.158	0.508963	0.636707	0.198896	2.55894	0.0104992	0.182526	493.962	447.517	644.672	815.812	603.036	1045.95
Gm43361	1137.32	-0.31621	-0.338764	0.123851	-2.55314	0.0106756	0.182526	1250.12	1262.38	1298.26	1022.11	1031.42	959.609
[truncated: 2,023 more rows]
