# Supplementary material for: Hox-dependent coordination of mouse cardiac progenitor cell patterning and differentiation
Source: eLife. 2020 Aug 17;9:e55124. doi: 10.7554/eLife.55124 (PMC7462617; doi:10.7554/eLife.55124)
Supplement: Supplementary file 2. [file elife-55124-supp2.xlsx]

## Sheet: GFP_annotated
PeakID (cmd=annotatePeaks.pl Diff_AtacSeq_Analysis_GFP.txt mm10 -annStats Diff_AtacSeq_Analysis_GFP.stats)	Chr	Start	End	Strand	Peak Score	Focus Ratio/Region Size	Annotation	Detailed Annotation	Distance to TSS	Nearest PromoterID	Entrez ID	Nearest Unigene	Nearest Refseq	Nearest Ensembl	Gene Name	Gene Alias	Gene Description	Gene Type
Peaks_621	chr1	58932629	58932880	+	0	NA	intron (NM_172406, intron 3 of 15)	IAPEz-int|LTR|ERVK	40728	NM_172406	70827	Mm.222887	NM_172406	ENSMUSG00000026028	Trak2	2900022D04Rik|4733401O11Rik|AI480836|AW046271|Als2cr3|CALS-C|GRIF-1|GRIF1|OIP98|mKIAA0549	trafficking protein, kinesin binding 2	protein-coding
Peaks_166	chr1	112822189	112822422	+	0	NA	Intergenic	L1Md_T|LINE|L1	-957387	NM_001081316	319901	Mm.103468	NM_001081316	ENSMUSG00000038702	Dsel	9330132E09Rik|DS-epi2	dermatan sulfate epimerase-like	protein-coding
Peaks_341	chr13	92488961	92489275	+	0	NA	intron (NM_173392, intron 17 of 17)	RLTR17B_Mm|LTR|ERVK	-5087	NM_001163627	73942	Mm.85935	NM_001163627	ENSMUSG00000034334	Fam151b	4930405M20Rik	family with sequence similarity 151, member B	protein-coding
Peaks_983	chr17	70917267	70917608	+	0	NA	Intergenic	Intergenic	-63905	NM_001164074	21815	Mm.101034	NM_009372	ENSMUSG00000047407	Tgif1	AA959811|AI462167|Tgif	TGFB-induced factor homeobox 1	protein-coding
Peaks_463	chr3	139543307	139543531	+	0	NA	intron (NM_198659, intron 12 of 13)	intron (NM_198659, intron 12 of 13)	337526	NM_198659	381476	Mm.188334	NM_198659	ENSMUSG00000047940	Stpg2	B930007M17Rik|Gm1017	sperm tail PG rich repeat containing 2	protein-coding
Peaks_606	chr1	185818989	185819508	+	0	NA	intron (NR_030555, intron 4 of 6)	intron (NR_030555, intron 4 of 6)	281912	NR_030555	100124483		NR_030555	ENSMUSG00000076976	Mir297c	Mirn297c	microRNA 297c	ncRNA
Peaks_421	chr1	11947365	11948635	+	0	NA	intron (NM_177173, intron 11 of 13)	IAPEz-int|LTR|ERVK	-477986	NR_105759	102465961		NR_105759	ENSMUSG00000098555	Mir6341	Gm27262|mmu-mir-6341	microRNA 6341	ncRNA
Peaks_386	chr3	99818106	99818813	+	0	NA	Intergenic	Intergenic	-66958	NM_028892	74362	Mm.55847	NM_028892	ENSMUSG00000027867	Spag17	4931427F14Rik|PF6|Spag17-ps	sperm associated antigen 17	protein-coding
Peaks_1797	chr1	85280345	85280679	+	0	NA	Intergenic	Intergenic	-9946	NM_001037909	620078	Mm.386456	NM_175219	ENSMUSG00000052477	C130026I21Rik	4930565N07Rik|OTTMUSG00000029174	RIKEN cDNA C130026I21 gene	protein-coding
Peaks_1251	chr1	14974584	14976039	+	0	NA	Intergenic	L1Md_T|LINE|L1	-56449	NM_177781	277328	Mm.186329	NM_177781	ENSMUSG00000032769	Trpa1	Anktm1|TRPA1b	transient receptor potential cation channel, subfamily A, member 1	protein-coding
Peaks_1185	chr1	5350339	5351628	+	0	NA	Intergenic	L1Md_T|LINE|L1	-237510	NM_011011	18387	Mm.7977	NM_011011	ENSMUSG00000025905	Oprk1	K-OR-1|KOR|KOR-1|MSL-1|Oprk2|R21	opioid receptor, kappa 1	protein-coding
Peaks_1339	chr11	101278746	101279152	+	0	NA	promoter-TSS (NM_026618)	promoter-TSS (NM_026618)	-1	NM_026618	52469	Mm.52	NM_026618	ENSMUSG00000017188	Coa3	1810033A19Rik|Ccdc56|D11Ertd99e|HSPC009	cytochrome C oxidase assembly factor 3	protein-coding
Peaks_237	chr1	185564939	185565565	+	0	NA	intron (NR_030555, intron 2 of 6)	MERVL-int|LTR|ERVL	27916	NR_030555	100124483		NR_030555	ENSMUSG00000076976	Mir297c	Mirn297c	microRNA 297c	ncRNA
Peaks_1005	chr14	16448522	16449070	+	0	NA	intron (NM_011243, intron 3 of 7)	(GGCTG)n|Simple_repeat|Simple_repeat	83590	NM_009409	21974	Mm.130362	NM_009409	ENSMUSG00000017485	Top2b	D230016L12Rik|Top-2	topoisomerase (DNA) II beta	protein-coding
Peaks_607	chr1	5551814	5552133	+	0	NA	Intergenic	L1Md_A|LINE|L1	-36520	NM_011011	18387	Mm.7977	NM_011011	ENSMUSG00000025905	Oprk1	K-OR-1|KOR|KOR-1|MSL-1|Oprk2|R21	opioid receptor, kappa 1	protein-coding
Peaks_659	chr6	138672761	138673167	+	0	NA	Intergenic	Intergenic	-14520	NM_015777	50540	Mm.84043	NM_015777	ENSMUSG00000046717	Igbp1b	alpha4-b	immunoglobulin (CD79A) binding protein 1b	protein-coding
Peaks_992	chr14	41314727	41315010	+	0	NA	Intergenic	Intergenic	-129670	NM_009160	20390	Mm.1321	NM_009160	ENSMUSG00000021795	Sftpd	AI573415|SP-D|Sfpd|Sftp4	surfactant associated protein D	protein-coding
Peaks_1080	chr13	119597433	119597587	+	0	NA	intron (NM_001039244, intron 2 of 2)	intron (NM_001039244, intron 2 of 2)	-26309	NM_020279	56838	Mm.143745	NM_020279	ENSMUSG00000074715	Ccl28	CCK1|MEC|Scya28	chemokine (C-C motif) ligand 28	protein-coding
Peaks_1589	chr1	184771441	184771883	+	0	NA	Intergenic	Intergenic	-39169	NM_008250	15284	Mm.1347	NM_008250	ENSMUSG00000039377	Hlx	Hlx1	H2.0-like homeobox	protein-coding
Peaks_723	chr17	13253490	13253790	+	0	NA	Intergenic	MLT1F|LTR|ERVL-MaLR	23377	NM_001167913	236574		NM_001167913	ENSMUSG00000073457	Smok2b	Gm1847|Smok+129	sperm motility kinase 2B	protein-coding
Peaks_1158	chr1	22236617	22237075	+	0	NA	Intergenic	L1Md_A|LINE|L1	195997	NM_053270	116837	Mm.60061	NM_053270	ENSMUSG00000041670	Rims1	C030033M19Rik|RIM1|RIM1a|RIM1alpha|Rab3ip1|Rim|Serg1|mKIAA0340	regulating synaptic membrane exocytosis 1	protein-coding
Peaks_1113	chr1	77481891	77482801	+	0	NA	intron (NM_007936, intron 3 of 17)	MERVL-int|LTR|ERVL	14422	NR_105770	102465180		NR_105770	ENSMUSG00000099141	Mir6352	Gm27481|mmu-mir-6352	microRNA 6352	ncRNA
Peaks_608	chrX	37241676	37241838	+	0	NA	Intergenic	Intergenic	-3235	NM_001310503	75199	Mm.391240	NM_029203	ENSMUSG00000051827	Rhox2a	4930539I12Rik|Rhox2|Rhox2.1	reproductive homeobox 2A	protein-coding
Peaks_103	chr3	156755198	156755432	+	0	NA	intron (NM_177274, intron 1 of 6)	intron (NM_177274, intron 1 of 6)	193521	NM_001039094	320840	Mm.317293	NM_177274	ENSMUSG00000040037	Negr1	5330422G01Rik|KILON|Ntra	neuronal growth regulator 1	protein-coding
Peaks_722	chr1	19799295	19800911	+	0	NA	Intergenic	L1Md_T|LINE|L1	-556351	NR_045734	75028	Mm.417820	NR_045734	ENSMUSG00000089914	4930486I03Rik	-	RIKEN cDNA 4930486I03 gene	ncRNA
Peaks_361	chr1	28248884	28250118	+	0	NA	Intergenic	RLTR10-int|LTR|ERVK	530751	NM_001013750	210962	Mm.214178	NM_001013750	ENSMUSG00000048411	Gm597	-	predicted gene 597	protein-coding
Peaks_205	chr2	175703480	175703734	+	0	NA	promoter-TSS (NM_001177404)	promoter-TSS (NM_001177404)	91	NM_001177406	100303732	Mm.484983	NM_001177404	ENSMUSG00000095199	Zfp967	Gm14431|OTTMUSG00000016608	zinc finger protein 967	protein-coding
Peaks_1530	chr1	81419626	81421031	+	0	NA	Intergenic	L1Md_T|LINE|L1	343011	NM_172849	241134	Mm.313904	NM_172849	ENSMUSG00000054976	Nyap2	9430031J16Rik|Jr6|Kiaa1486	neuronal tyrosine-phophorylated phosphoinositide 3-kinase adaptor 2	protein-coding
Peaks_545	chr4	78513327	78513618	+	0	NA	Intergenic	IAPEz-int|LTR|ERVK	-80575	NR_131142	623726		NR_131142		A430085M09Rik	EG623726	RIKEN cDNA A430085M09 gene	ncRNA
Peaks_229	chr1	8161318	8161410	+	0	NA	Intergenic	IAPEz-int|LTR|ERVK	1072444	NM_183028	319263	Mm.21539	NM_183028	ENSMUSG00000051285	Pcmtd1	8430411F12Rik|A030012M09Rik	protein-L-isoaspartate (D-aspartate) O-methyltransferase domain containing 1	protein-coding
Peaks_1000	chr1	82426316	82426693	+	0	NA	intron (NM_029777, intron 6 of 6)	MERVL-int|LTR|ERVL	87455	NM_001122685	76867	Mm.226994	NM_029777	ENSMUSG00000026142	Rhbdd1	4930418P06Rik|RRP4|mRHBDD1	rhomboid domain containing 1	protein-coding
Peaks_309	chr7	14772444	14772715	+	0	NA	Intergenic	MTA_Mm|LTR|ERVL-MaLR	112871	NM_001038676	194588	Mm.389816	NM_001038676	ENSMUSG00000055942	Obox7	EG194588|Gm4745	oocyte specific homeobox 7	protein-coding
Peaks_363	chr4	131803276	131803589	+	0	NA	exon (NM_011214, exon 9 of 30)	exon (NM_011214, exon 9 of 30)	34846	NM_011214	19273	Mm.4860	NM_011214	ENSMUSG00000028909	Ptpru	Ftp-1|PCP-2|PTP|PTP-lambda|PTPlambda|Pcp2|Ptpf|Ptprl|R-PTP-U|R-PTP-psi|RPTPlambda	protein tyrosine phosphatase, receptor type, U	protein-coding
Peaks_1151	chr17	15722657	15722974	+	0	NA	intron (NM_007690, intron 2 of 35)	(TGGA)n|Simple_repeat|Simple_repeat	17848	NM_007690	12648	Mm.8137	NM_007690	ENSMUSG00000023852	Chd1	4930525N21Rik|AI851787|AW555109	chromodomain helicase DNA binding protein 1	protein-coding
Peaks_956	chr1	29612891	29613315	+	0	NA	Intergenic	MMERVK10C-int|LTR|ERVK	191615	NR_105760	102465174		NR_105760	ENSMUSG00000099257	Mir6342	Gm27268|mmu-mir-6342	microRNA 6342	ncRNA
Peaks_283	chr1	5250994	5251162	+	0	NA	Intergenic	MERVL-int|LTR|ERVL	167992	NM_001310442	108664	Mm.27082	NM_133826	ENSMUSG00000033793	Atp6v1h	0710001F19Rik|AU022349|CGI-11|SFD|SFDalpha|SFDbeta|VMA13	ATPase, H+ transporting, lysosomal V1 subunit H	protein-coding
Peaks_1019	chr3	92106638	92106918	+	0	NA	Intergenic	MIR|SINE|MIR	17169	NM_175424	109314	Mm.440617	NM_175424	ENSMUSG00000056270	Prr9	A030004J04Rik	proline rich 9	protein-coding
Peaks_1015	chr1	35867801	35868438	+	0	NA	Intergenic	MTA_Mm-int|LTR|ERVL-MaLR	-200281	NM_015818	50785	Mm.213566	NM_015818	ENSMUSG00000045216	Hs6st1	6Ost1	heparan sulfate 6-O-sulfotransferase 1	protein-coding
Peaks_119	chr4	41809308	41810497	+	0	NA	Intergenic	Intergenic	-35726	NM_001347065	20301	Mm.335946	NM_011336	ENSMUSG00000073888	Ccl27a	ALP|AW558992|CTACK|CTAK|Ccl27|ESkine|ILC|PESKY|Scya27|Scya27a	chemokine (C-C motif) ligand 27A	protein-coding
Peaks_1502	chr1	49324892	49325549	+	0	NA	Intergenic	RLTR6-int|LTR|ERV1	-1602303	NM_019790	56363	Mm.245154	NM_019790	ENSMUSG00000026109	Tmeff2	4832418D20Rik|7630402F16Rik|TR-2	transmembrane protein with EGF-like and two follistatin-like domains 2	protein-coding
Peaks_1301	chr1	30165387	30165697	+	0	NA	Intergenic	L1Md_A|LINE|L1	697714	NM_001081080	213109	Mm.194486	NM_025871	ENSMUSG00000048874	Phf3	2310061N19Rik|mKIAA0244	PHD finger protein 3	protein-coding
Peaks_1076	chr1	32265106	32265343	+	0	NA	intron (NM_133235, intron 2 of 8)	L1Md_Gf|LINE|L1	92418	NM_133235	170771	Mm.336594	NM_133235	ENSMUSG00000026058	Khdrbs2	6330586C16Rik|Slim1|Slm-1|Slm1|mSLM-1	KH domain containing, RNA binding, signal transduction associated 2	protein-coding
Peaks_822	chr4	90877079	90877279	+	0	NA	Intergenic	RLTR6-int|LTR|ERV1	494876	NM_010486	15569	Mm.318042	NM_010486	ENSMUSG00000008489	Elavl2	Hub|mel-N1	ELAV (embryonic lethal, abnormal vision, Drosophila)-like 2 (Hu antigen B)	protein-coding
Peaks_353	chr1	3750574	3750891	+	0	NA	Intergenic	L1Md_T|LINE|L1	-79234	NM_001011874	497097	Mm.454496	NM_001011874	ENSMUSG00000051951	Xkr4	AY534250|Gm210|XRG4|mKIAA1889	X-linked Kx blood group related 4	protein-coding
Peaks_1310	chr1	164224669	164225761	+	0	NA	Intergenic	RLTR4_MM-int|LTR|ERV1	-23831	NM_054087	116914	Mm.35444	NM_054087	ENSMUSG00000040918	Slc19a2	AV276020|AW322295|DDA1|THTR1|TRMA	solute carrier family 19 (thiamine transporter), member 2	protein-coding
Peaks_1156	chr1	91475505	91475767	+	0	NA	Intergenic	IAPEz-int|LTR|ERVK	-16308	NM_011066	18627	Mm.482463	NM_011066	ENSMUSG00000055866	Per2	mKIAA0347|mPer2	period circadian clock 2	protein-coding
Peaks_321	chr2	175141612	175142359	+	0	NA	Intergenic	Intergenic	64932	NM_001164689	626832	Mm.441314	NM_001164689	ENSMUSG00000078887	Gm6710	1600017I02Rik|2310011F05Rik|2900089K14Rik|3100002L24Rik|WF-4	predicted gene 6710	protein-coding
Peaks_1358	chr5	126787612	126788329	+	0	NA	Intergenic	Intergenic	-242819	NR_040685	71247	Mm.399586	NR_040685	ENSMUSG00000105490	4933438B17Rik	-	RIKEN cDNA 4933438B17 gene	ncRNA
Peaks_1287	chr12	119273693	119274024	+	0	NA	Intergenic	Intergenic	-35582	NM_177290	320910	Mm.217000	NM_177290	ENSMUSG00000025321	Itgb8	4832412O06Rik	integrin beta 8	protein-coding
Peaks_45	chr2	57214485	57214764	+	0	NA	Intergenic	RLTR4_Mm|LTR|ERV1	-23054	NM_001145820	14571	Mm.3711	NM_010274	ENSMUSG00000026827	Gpd2	AA408484|AI448216|AU021455|AW494132|GPDH|Gdm1|Gpd-m|Gpdh-m|TISP38	glycerol phosphate dehydrogenase 2, mitochondrial	protein-coding
Peaks_318	chr1	23302913	23303683	+	0	NA	Intergenic	IAPEz-int|LTR|ERVK	11597	NR_029717	723964		NR_029717	ENSMUSG00000065567	Mir30c-2	Mirn30c-2|mir-30c-2	microRNA 30c-2	ncRNA
Peaks_1773	chr12	110919305	110919412	+	0	NA	intron (NM_175336, intron 6 of 20)	ORR1A1|LTR|ERVL-MaLR	30094	NM_001081057	104859	Mm.35583	NM_175336	ENSMUSG00000021275	Tecpr2	4930573I19Rik|AI604920|mKIAA0297	tectonin beta-propeller repeat containing 2	protein-coding
Peaks_1528	chr1	84379156	84379743	+	0	NA	intron (NM_152915, intron 12 of 12)	L1Md_T|LINE|L1	-94804	NM_001003948	98496	Mm.187470	NM_001003948	ENSMUSG00000045658	Pid1	5033414K04Rik|NYGGF4	phosphotyrosine interaction domain containing 1	protein-coding
Peaks_1690	chr11	111065665	111066614	+	0	NA	promoter-TSS (NM_008425)	promoter-TSS (NM_008425)	-25	NM_008425	16518	Mm.4951	NM_008425	ENSMUSG00000041695	Kcnj2	IRK1|Kcnf1|Kir2.1	potassium inwardly-rectifying channel, subfamily J, member 2	protein-coding
Peaks_1748	chr3	134828834	134829778	+	0	NA	exon (NM_021382, exon 1 of 5)	exon (NM_021382, exon 1 of 5)	299	NM_021382	21338	Mm.103810	NM_021382	ENSMUSG00000028172	Tacr3	Nk3r|Nkr|Tac3r	tachykinin receptor 3	protein-coding
Peaks_148	chr3	12222741	12222937	+	0	NA	Intergenic	RLTR10-int|LTR|ERVK	-378480	NR_040751	100038545	Mm.388494	NR_040751	ENSMUSG00000104015	Gm10745	ENSMUSG00000074696	predicted gene 10745	ncRNA
Peaks_86	chr2	87936154	87936250	+	0	NA	Intergenic	IAPEz-int|LTR|ERVK	7424	NM_146643	258636	Mm.377605	NM_146643	ENSMUSG00000075145	Olfr1155	MOR174-10	olfactory receptor 1155	protein-coding
Peaks_1311	chr1	79581194	79581671	+	0	NA	Intergenic	Intergenic	90540	NM_183027	252903	Mm.32409	NM_183027	ENSMUSG00000054702	Ap1s3	1190009B22|Jr2|[s]3A	adaptor-related protein complex AP-1, sigma 3	protein-coding
Peaks_1120	chr14	78011237	78011697	+	0	NA	Intergenic	B4A|SINE|B4	77540	NM_177629	219170	Mm.320428	NM_177629	ENSMUSG00000045655	Fam216b	9330158N17|AU021034	family with sequence similarity 216, member B	protein-coding
Peaks_1622	chr8	64205247	64206061	+	0	NA	5' UTR (NM_009390, exon 1 of 21)	5' UTR (NM_009390, exon 1 of 21)	339	NM_009390	21892	Mm.418367	NM_009390	ENSMUSG00000053626	Tll1	Tll|Tll-1	tolloid-like	protein-coding
Peaks_1444	chr1	13998594	13998854	+	0	NA	Intergenic	IAPLTR1a_Mm|LTR|ERVK	-211795	NR_004447	433273	Mm.304088	NR_004447	ENSMUSG00000097711	Gm5523	EG433273	glyceraldehyde-3-phosphate dehydrogenase pseudogene	pseudo
Peaks_1327	chr5	36661452	36661631	+	0	NA	intron (NM_001081232, intron 2 of 8)	intron (NM_001081232, intron 2 of 8)	34480	NM_001081232	320661	Mm.26480	NM_177221	ENSMUSG00000029190	D5Ertd579e	9030221A05Rik|A930018H20Rik|Kiaa0232	DNA segment, Chr 5, ERATO Doi 579, expressed	protein-coding
Peaks_1815	chrX	51206086	51206158	+	0	NA	promoter-TSS (NM_134163)	promoter-TSS (NM_134163)	-132	NM_134163	171170	Mm.295324	NM_134163	ENSMUSG00000036109	Mbnl3	A530038J18Rik|AI661274|CHCR|E430034C16Rik|MBLX|MBLX39|MBXL	muscleblind-like 3 (Drosophila)	protein-coding
Peaks_1372	chr9	70622847	70623659	+	0	NA	intron (NM_172772, intron 5 of 8)	(CTGTG)n|Simple_repeat|Simple_repeat	33921	NM_172772	235461	Mm.170855	NM_172772	ENSMUSG00000042444	Fam63b	AI465301|B230380D07Rik|mKIAA1164	family with sequence similarity 63, member B	protein-coding
Peaks_832	chr1	11258652	11258777	+	0	NA	intron (NM_029525, intron 35 of 39)	MERVL-int|LTR|ERVL	-5249	NM_001033636	109294	Mm.123247	NM_029525	ENSMUSG00000048960	Prex2	6230420N16Rik|AI316880|AI553603|C030045D06Rik|D430013K02|Depdc2|P-Rex2	phosphatidylinositol-3,4,5-trisphosphate-dependent Rac exchange factor 2	protein-coding
Peaks_918	chr1	38705595	38706579	+	0	NA	Intergenic	IAPEz-int|LTR|ERVK	-78843	NM_001290814	16764	Mm.336679	NM_010678	ENSMUSG00000037138	Aff3	3222402O04Rik|A730046J16|LAF-4|Laf4	AF4/FMR2 family, member 3	protein-coding
Peaks_1686	chr1	171066600	171066845	+	0	NA	Intergenic	Intergenic	-2070	NR_106103	102466998		NR_106103	ENSMUSG00000099119	Mir6546	Gm27408|mmu-mir-6546	microRNA 6546	ncRNA
Peaks_834	chr1	114186075	114186734	+	0	NA	Intergenic	IAPEz-int|LTR|ERVK	-1498733	NM_001077425	636808	Mm.101576	NM_001077425	ENSMUSG00000070695	Cntnap5a	Caspr5-1|EG636808	contactin associated protein-like 5A	protein-coding
Peaks_401	chr10	115170253	115170373	+	0	NA	intron (NM_173391, intron 5 of 10)	(TG)n|Simple_repeat|Simple_repeat	14709	NM_173391	216343	Mm.31597	NM_173391	ENSMUSG00000006764	Tph2	AU043594|Ntph	tryptophan hydroxylase 2	protein-coding
Peaks_18	chrX	75730394	75731289	+	0	NA	intron (NR_029443, intron 8 of 8)	intron (NR_029443, intron 8 of 8)	33858	NR_029443	74396	Mm.162493	NR_029443	ENSMUSG00000087396	4933407K13Rik	A130080L05Rik	RIKEN cDNA 4933407K13 gene	ncRNA
Peaks_1613	chr5	12383071	12384090	+	0	NA	5' UTR (NM_028882, exon 1 of 18)	5' UTR (NM_028882, exon 1 of 18)	414	NM_028882	108151	Mm.89313	NM_028882	ENSMUSG00000040254	Sema3d	4631426B19Rik	sema domain, immunoglobulin domain (Ig), short basic domain, secreted, (semaphorin) 3D	protein-coding
Peaks_1541	chr10	121533139	121533703	+	0	NA	Intergenic	Intergenic	53373	NM_019786	56480	Mm.34580	NM_019786	ENSMUSG00000020115	Tbk1	1200008B05Rik|AI462036|AW048562	TANK-binding kinase 1	protein-coding
Peaks_174	chr1	6169440	6171998	+	0	NA	Intergenic	IAPEz-int|LTR|ERVK	-43943	NM_009826	12421	Mm.293811	NM_009826	ENSMUSG00000025907	Rb1cc1	2900055E04Rik|5930404L04Rik|Cc1|FIP200|LaXp180	RB1-inducible coiled-coil 1	protein-coding
Peaks_372	chr7	59717127	59717603	+	0	NA	Intergenic	Intergenic	-1215	NR_033778	64244		NR_033778	ENSMUSG00000096475	Snord116l1	Pwcr1l1	small nucleolar RNA, C/D box 116-like 1	snoRNA
Peaks_1309	chr8	20367376	20367740	+	0	NA	Intergenic	Intergenic	-4356	NM_001177408	100040599	Mm.491087	NM_001177408	ENSMUSG00000074449	Gm15319	OTTMUSG00000020118	predicted gene 15319	protein-coding
Peaks_1137	chr1	87466165	87466446	+	0	NA	Intergenic	IAPEz-int|LTR|ERVK	-3959	NM_028473	73234	Mm.7310	NM_028473	ENSMUSG00000026258	3110079O15Rik	Snorc	RIKEN cDNA 3110079O15 gene	protein-coding
Peaks_27	chr7	15156919	15157173	+	0	NA	Intergenic	L1_Mus3|LINE|L1	-231805	NM_145708	246792	Mm.26391	NM_145708	ENSMUSG00000074369	Obox2	-	oocyte specific homeobox 2	protein-coding
Peaks_326	chr1	10735163	10735272	+	0	NA	intron (NR_030645, intron 2 of 3)	IAPEz-int|LTR|ERVK	-15272	NM_177834	329093	Mm.336423	NM_177834	ENSMUSG00000042501	Cpa6	9030616D13Rik	carboxypeptidase A6	protein-coding
Peaks_1382	chr1	160351757	160352332	+	0	NA	promoter-TSS (NM_001038621)	promoter-TSS (NM_001038621)	-473	NM_001038621	29809	Mm.25833	NM_013862	ENSMUSG00000026721	Rabgap1l	5830411O09Rik|8430421H08Rik|9630005B12Rik|AW049894|HHL|Hh1|mKIAA0471	RAB GTPase activating protein 1-like	protein-coding
Peaks_1537	chr2	142253968	142254197	+	0	NA	intron (NM_001013802, intron 11 of 18)	intron (NM_001013802, intron 11 of 18)	647382	NM_001081133	16558	Mm.251934	NM_001081133	ENSMUSG00000038844	Kif16b	8430434E15Rik|AA623607|AI789011|C80253|C80902|mKIAA1590	kinesin family member 16B	protein-coding
Peaks_890	chr1	82501824	82502127	+	0	NA	intron (NM_007735, intron 22 of 47)	IAPEz-int|LTR|ERVK	84874	NM_007735	12829	Mm.40253	NM_007735	ENSMUSG00000067158	Col4a4	E130010M05Rik|[a]4(IV)	collagen, type IV, alpha 4	protein-coding
Peaks_1603	chr1	5189212	5190202	+	0	NA	Intergenic	L1Md_T|LINE|L1	106621	NM_001310442	108664	Mm.27082	NM_133826	ENSMUSG00000033793	Atp6v1h	0710001F19Rik|AU022349|CGI-11|SFD|SFDalpha|SFDbeta|VMA13	ATPase, H+ transporting, lysosomal V1 subunit H	protein-coding
Peaks_741	chr1	18762461	18763143	+	0	NA	Intergenic	RLTR10-int|LTR|ERVK	-340220	NM_153154	226896	Mm.244858	NM_153154	ENSMUSG00000042596	Tfap2d	Tcfap2d	transcription factor AP-2, delta	protein-coding
Peaks_751	chr1	3499579	3501009	+	0	NA	intron (NM_001011874, intron 1 of 2)	L1Md_T|LINE|L1	171204	NM_001011874	497097	Mm.454496	NM_001011874	ENSMUSG00000051951	Xkr4	AY534250|Gm210|XRG4|mKIAA1889	X-linked Kx blood group related 4	protein-coding
Peaks_1096	chrX	29976099	29976754	+	0	NA	intron (NM_001099347, intron 1 of 8).12	intron (NM_001099347, intron 1 of 8).12	112	NM_001109969	100039240	Mm.483167	NM_001109969	ENSMUSG00000095293	Gm10058	ENSMUSG00000059047	predicted gene 10058	protein-coding
Peaks_1405	chr8	109595898	109596223	+	0	NA	exon (NM_020046, exon 5 of 9)	exon (NM_020046, exon 5 of 9)	12613	NM_020046	56749	Mm.23894	NM_020046	ENSMUSG00000031730	Dhodh	2810417D19Rik|AI834883	dihydroorotate dehydrogenase	protein-coding
Peaks_1516	chr12	38780027	38780565	+	0	NA	5' UTR (NM_007960, exon 1 of 13)	5' UTR (NM_007960, exon 1 of 13)	214	NM_007960	14009	Mm.4866	NM_007960	ENSMUSG00000004151	Etv1	ER81|Etsrp81	ets variant 1	protein-coding
Peaks_1026	chr6	16212984	16213355	+	0	NA	Intergenic	Intergenic	492508	NM_175088	16543	Mm.1314	NM_175088	ENSMUSG00000041390	Mdfic	Kdt1|Mdfid	MyoD family inhibitor domain containing	protein-coding
Peaks_970	chr1	31005783	31006292	+	0	NA	Intergenic	IAPEz-int|LTR|ERVK	-56282	NM_011200	19243	Mm.491181	NM_011200	ENSMUSG00000026064	Ptp4a1	AA415290|AU019864|C130021B01|Prl-1	protein tyrosine phosphatase 4a1	protein-coding
Peaks_587	chr1	171081895	171082084	+	0	NA	Intergenic	Intergenic	-17337	NR_106103	102466998		NR_106103	ENSMUSG00000099119	Mir6546	Gm27408|mmu-mir-6546	microRNA 6546	ncRNA
Peaks_1097	chr1	69702588	69703101	+	0	NA	Intergenic	IAPA_MM-int|LTR|ERVK	-16884	NM_011770	22779	Mm.106343	NM_011770	ENSMUSG00000025997	Ikzf2	A730095J18Rik|Helios|Zfpn1a2|Znfn1a2	IKAROS family zinc finger 2	protein-coding
Peaks_731	chr1	16381622	16382738	+	0	NA	intron (NM_001347045, intron 7 of 10)	MTA_Mm-int|LTR|ERVL-MaLR	136935	NM_001347044	29819	Mm.216257	NM_025303	ENSMUSG00000025920	Stau2	-	staufen (RNA binding protein) homolog 2 (Drosophila)	protein-coding
Peaks_684	chr1	5252904	5253579	+	0	NA	Intergenic	MERVL-int|LTR|ERVL	170155	NM_001310442	108664	Mm.27082	NM_133826	ENSMUSG00000033793	Atp6v1h	0710001F19Rik|AU022349|CGI-11|SFD|SFDalpha|SFDbeta|VMA13	ATPase, H+ transporting, lysosomal V1 subunit H	protein-coding
Peaks_219	chr2	15431762	15432118	+	0	NA	Intergenic	IAPEz-int|LTR|ERVK	-94539	NM_001310455	102635496		NM_001310455	ENSMUSG00000075520	Malrd1	-	MAM and LDL receptor class A domain containing 1	protein-coding
Peaks_271	chr1	16623611	16624270	+	0	NA	Intergenic	MERVL-int|LTR|ERVL	-4602	NM_001271017	66799	Mm.122430	NM_025773	ENSMUSG00000025939	Ube2w	6130401J04Rik	ubiquitin-conjugating enzyme E2W (putative)	protein-coding
Peaks_1726	chr1	26475451	26475795	+	0	NA	Intergenic	IAPEz-int|LTR|ERVK	211837	NM_001033764	210940	Mm.297614	NM_001033764	ENSMUSG00000073722	4931408C20Rik	-	RIKEN cDNA 4931408C20 gene	protein-coding
Peaks_580	chr1	195258965	195259251	+	0	NA	Intergenic	ETnERV-int|LTR|ERVK	-82393	NM_007758	12902	Mm.235387	NM_007758	ENSMUSG00000026616	Cr2	C3DR|CD21|CD35|Cr-1|Cr-2|Cr1	complement receptor 2	protein-coding
Peaks_1592	chr14	74764273	74764551	+	0	NA	intron (NM_001252132, intron 18 of 18)	intron (NM_001252132, intron 18 of 18)	32115	NM_016903	13885	Mm.38055	NM_016903	ENSMUSG00000021996	Esd	Es-10|Es10|FGH|sid478	esterase D/formylglutathione hydrolase	protein-coding
Peaks_37	chr7	14771921	14772344	+	0	NA	Intergenic	L1_Mus2|LINE|L1	112424	NM_001038676	194588	Mm.389816	NM_001038676	ENSMUSG00000055942	Obox7	EG194588|Gm4745	oocyte specific homeobox 7	protein-coding
Peaks_1491	chr4	45184371	45185606	+	0	NA	promoter-TSS (NM_001081172)	promoter-TSS (NM_001081172)	82	NM_001081172	666060	Mm.24783	NM_001081172	ENSMUSG00000035615	Frmpd1	BC031840|mKIAA0967	FERM and PDZ domain containing 1	protein-coding
Peaks_1629	chr11	33607735	33608277	+	0	NA	Intergenic	Intergenic	-29049	NM_146017	216643	Mm.99989	NM_146017	ENSMUSG00000020159	Gabrp	-	gamma-aminobutyric acid (GABA) A receptor, pi	protein-coding
Peaks_1131	chr1	5804658	5804899	+	0	NA	Intergenic	IAPEz-int|LTR|ERVK	112620	NM_010342	226304	Mm.291110	NM_010342	ENSMUSG00000033774	Npbwr1	Gpr7|Nbpwr1	neuropeptides B/W receptor 1	protein-coding
Peaks_160	chr11	5777503	5777729	+	0	NA	intron (NR_015577, intron 4 of 6)	intron (NR_015577, intron 4 of 6)	-10867	NM_001146309	13169	Mm.256925	NM_013810	ENSMUSG00000020476	Dbnl	Abp1|SH3P7|mAbp1	drebrin-like	protein-coding
Peaks_1176	chr6	9494318	9494403	+	0	NA	Intergenic	(TCCCC)n|Simple_repeat|Simple_repeat	544341	NM_008751	18231	Mm.46954	NM_008751	ENSMUSG00000046178	Nxph1	C130005L03Rik	neurexophilin 1	protein-coding
Peaks_71	chrX	3190904	3191181	+	0	NA	Intergenic	Intergenic	114122	NM_001270667	100861966	Mm.443264	NM_001270667	ENSMUSG00000100249	Btbd35f23	Gm21950|Mgclh	BTB domain containing 35, family member 23	protein-coding
Peaks_1736	chr1	16914858	16915486	+	0	NA	Intergenic	L1Md_T|LINE|L1	182717	NM_020604	57339	Mm.143761	NM_020604	ENSMUSG00000042686	Jph1	ENSMUSG00000054314|JP-1|Jp1	junctophilin 1	protein-coding
Peaks_1231	chr8	66696771	66697456	+	0	NA	promoter-TSS (NM_010934)	promoter-TSS (NM_010934)	-309	NM_010934	18166	Mm.5112	NM_010934	ENSMUSG00000036437	Npy1r	Npyr|Y1-R	neuropeptide Y receptor Y1	protein-coding
Peaks_1781	chr2	141103484	141103589	+	0	NA	intron (NM_001013802, intron 5 of 18)	L1Md_T|LINE|L1	-432060	NM_178382	71436	Mm.426781	NM_178382	ENSMUSG00000051379	Flrt3	5530600M07Rik|C430047I10Rik|mKIAA1469	fibronectin leucine rich transmembrane protein 3	protein-coding
Peaks_812	chr1	69701449	69701752	+	0	NA	Intergenic	IAPEz-int|LTR|ERVK	-15640	NM_011770	22779	Mm.106343	NM_011770	ENSMUSG00000025997	Ikzf2	A730095J18Rik|Helios|Zfpn1a2|Znfn1a2	IKAROS family zinc finger 2	protein-coding
Peaks_616	chr1	5251400	5251847	+	0	NA	Intergenic	MERVL-int|LTR|ERVL	168537	NM_001310442	108664	Mm.27082	NM_133826	ENSMUSG00000033793	Atp6v1h	0710001F19Rik|AU022349|CGI-11|SFD|SFDalpha|SFDbeta|VMA13	ATPase, H+ transporting, lysosomal V1 subunit H	protein-coding
Peaks_189	chr1	11260300	11262441	+	0	NA	intron (NM_029525, intron 35 of 39)	MERVL-int|LTR|ERVL	-2593	NM_001033636	109294	Mm.123247	NM_029525	ENSMUSG00000048960	Prex2	6230420N16Rik|AI316880|AI553603|C030045D06Rik|D430013K02|Depdc2|P-Rex2	phosphatidylinositol-3,4,5-trisphosphate-dependent Rac exchange factor 2	protein-coding
Peaks_155	chr8	32068689	32069543	+	0	NA	Intergenic	Intergenic	-82779	NR_046039	666589	Mm.367675	NR_046039		Gm8179	EG666589	predicted gene 8179	ncRNA
Peaks_458	chr2	128274103	128274305	+	0	NA	Intergenic	Lx7|LINE|L1	146629	NM_001284410	12125	Mm.141083	NM_009754	ENSMUSG00000027381	Bcl2l11	1500006F24Rik|Bim|Bod|bcl2-L-11	BCL2-like 11 (apoptosis facilitator)	protein-coding
Peaks_349	chr2	158291506	158292091	+	0	NA	Intergenic	MERVL-int|LTR|ERVL	-14695	NM_008489	16803	Mm.218846	NM_008489	ENSMUSG00000016024	Lbp	Bpifd2|Ly88	lipopolysaccharide binding protein	protein-coding
Peaks_290	chr3	145632954	145633382	+	0	NA	Intergenic	Intergenic	16817	NM_010516	16007	Mm.1231	NM_010516	ENSMUSG00000028195	Cyr61	AI325051|CCN1|Igfbp10	cysteine rich protein 61	protein-coding
Peaks_1833	chr6	25507977	25508587	+	0	NA	Intergenic	L1_Mus1|LINE|L1	181698	NM_010338	14763	Mm.409670	NM_010338	ENSMUSG00000039904	Gpr37	AI848630|Pael-R	G protein-coupled receptor 37	protein-coding
Peaks_1340	chrX	16618187	16619245	+	0	NA	promoter-TSS (NM_173740)	promoter-TSS (NM_173740)	-982	NM_173740	17161	Mm.21108	NM_173740	ENSMUSG00000025037	Maoa	1110061B18Rik|AA407771	monoamine oxidase A	protein-coding
Peaks_1246	chr6	127349602	127349808	+	0	NA	Intergenic	Intergenic	-41738	NR_073373	232386	Mm.257367	NR_073373	ENSMUSG00000107153	Gm38404	D130058E03	predicted gene, 38404	ncRNA
Peaks_184	chr1	3346028	3346646	+	0	NA	intron (NM_001011874, intron 2 of 2)	L1Md_T|LINE|L1	325161	NM_001011874	497097	Mm.454496	NM_001011874	ENSMUSG00000051951	Xkr4	AY534250|Gm210|XRG4|mKIAA1889	X-linked Kx blood group related 4	protein-coding
Peaks_1273	chr3	144643312	144643949	+	0	NA	Intergenic	Intergenic	73203	NM_053102	93684	Mm.29812	NM_053102	ENSMUSG00000037072	Selenof	9430015P09Rik|Sep15	selenoprotein F	protein-coding
Peaks_358	chr7	133856330	133856714	+	0	NA	intron (NM_025850, intron 2 of 10)	intron (NM_025850, intron 2 of 10)	-73737	NM_001286031	101437	Mm.199223	NM_133941	ENSMUSG00000030986	Dhx32	3110079L04Rik|4732469F02Rik|AA408140|Ddx32	DEAH (Asp-Glu-Ala-His) box polypeptide 32	protein-coding
Peaks_1659	chr6	128838838	128839797	+	0	NA	Intergenic	Intergenic	-13002	NM_030599	80782	Mm.6180	NM_030599	ENSMUSG00000079298	Klrb1b	Klrb1d|Ly55b|Ly55d|NKR-P1B|NKR-P1D|Nkrp1-b|Nkrp1d|ly-55b|ly-55d	killer cell lectin-like receptor subfamily B member 1B	protein-coding
Peaks_1055	chr1	87742388	87743187	+	0	NA	Intergenic	MERVL-int|LTR|ERVL	-13224	NM_029846	77040	Mm.272972	NM_029846	ENSMUSG00000026289	Atg16l1	1500009K01Rik|Apg16l|Atg16l|WDR30	autophagy related 16-like 1 (S. cerevisiae)	protein-coding
Peaks_264	chr1	26470893	26471328	+	0	NA	Intergenic	IAPEz-int|LTR|ERVK	216350	NM_001033764	210940	Mm.297614	NM_001033764	ENSMUSG00000073722	4931408C20Rik	-	RIKEN cDNA 4931408C20 gene	protein-coding
Peaks_432	chr2	150500575	150500954	+	0	NA	Intergenic	CpG	-15701	NM_001034900	545471	Mm.451002	NM_001034900	ENSMUSG00000074731	Zfp345	OTTMUSG00000015743	zinc finger protein 345	protein-coding
Peaks_1108	chr7	104501978	104502373	+	0	NA	intron (NM_199146, intron 1 of 7)	CpG	5674	NM_199146	209387	Mm.277377	NM_199146	ENSMUSG00000057596	Trim30d	AI451617|TRIM30-3|Trim79	tripartite motif-containing 30D	protein-coding
Peaks_31	chr3	132017555	132018013	+	0	NA	Intergenic	Intergenic	-67508	NM_020265	56811	Mm.103593	NM_020265	ENSMUSG00000028031	Dkk2	-	dickkopf WNT signaling pathway inhibitor 2	protein-coding
Peaks_1766	chr3	59121048	59121488	+	0	NA	intron (NM_001287119, intron 1 of 2)	intron (NM_001287119, intron 1 of 2)	9494	NM_001008497	140795	Mm.439021	NM_133200	ENSMUSG00000036381	P2ry14	A330108O13Rik|Gpr105|P2Y14	purinergic receptor P2Y, G-protein coupled, 14	protein-coding
Peaks_405	chr1	4564826	4565052	+	0	NA	Intergenic	L1Md_T|LINE|L1	-67585	NM_001289465	20671	Mm.279103	NM_011441	ENSMUSG00000025902	Sox17	-	SRY (sex determining region Y)-box 17	protein-coding
Peaks_1043	chr1	3612716	3613993	+	0	NA	intron (NM_001011874, intron 1 of 2)	MTA_Mm-int|LTR|ERVL-MaLR	58144	NM_001011874	497097	Mm.454496	NM_001011874	ENSMUSG00000051951	Xkr4	AY534250|Gm210|XRG4|mKIAA1889	X-linked Kx blood group related 4	protein-coding
Peaks_542	chr1	68624859	68625551	+	0	NA	intron (NM_010154, intron 2 of 26)	L1Md_T|LINE|L1	482854	NM_010154	13869	Mm.442420	NM_010154	ENSMUSG00000062209	Erbb4	Her4|c-erbB-4	erb-b2 receptor tyrosine kinase 4	protein-coding
Peaks_136	chr1	16624671	16625593	+	0	NA	Intergenic	MERVL-int|LTR|ERVL	-5794	NM_001271017	66799	Mm.122430	NM_025773	ENSMUSG00000025939	Ube2w	6130401J04Rik	ubiquitin-conjugating enzyme E2W (putative)	protein-coding
Peaks_1356	chr1	175344916	175345553	+	0	NA	intron (NM_001347195, intron 2 of 17)	L1Md_T|LINE|L1	147311	NM_011880	24012	Mm.7956	NM_011880	ENSMUSG00000026527	Rgs7	-	regulator of G protein signaling 7	protein-coding
Peaks_1202	chr8	25090099	25090476	+	0	NA	intron (NM_031257, intron 1 of 11)	(CA)n|Simple_repeat|Simple_repeat	11524	NM_031257	83436	Mm.261122	NM_031257	ENSMUSG00000031557	Plekha2	6430512N22Rik|AI851530|AU041791|TAPP2|W91773	pleckstrin homology domain-containing, family A (phosphoinositide binding specific) member 2	protein-coding
Peaks_122	chr14	6888859	6889115	+	0	NA	Intergenic	Intergenic	-131930	NM_001309401	100041151	Mm.396155	NM_001309401	ENSMUSG00000091754	Gm3636	100042043	predicted gene 3636	protein-coding
Peaks_65	chr9	87562804	87563161	+	0	NA	Intergenic	Intergenic	168278	NM_023814	76365	Mm.158789	NM_023814	ENSMUSG00000032419	Tbx18	2810012F10Rik|2810404D13Rik	T-box18	protein-coding
Peaks_297	chr15	68927811	68928760	+	0	NA	promoter-TSS (NM_010158)	promoter-TSS (NM_010158)	-135	NM_010158	13992	Mm.17964	NM_010158	ENSMUSG00000022332	Khdrbs3	Etle|SLM-2|Salp|Slm2|T-STAR	KH domain containing, RNA binding, signal transduction associated 3	protein-coding
Peaks_624	chr1	48089455	48090911	+	0	NA	Intergenic	IAPEz-int|LTR|ERVK	-623058	NR_105768	102466969		NR_105768	ENSMUSG00000098876	Mir6350	Gm27958|mmu-mir-6350	microRNA 6350	ncRNA
Peaks_911	chr3	126643176	126643899	+	0	NA	intron (NM_001346636, intron 2 of 20)	intron (NM_001346636, intron 2 of 20)	46586	NM_023813	108058	Mm.255822	NM_023813	ENSMUSG00000053819	Camk2d	2810011D23Rik|8030469K03Rik|CaMK II|[d]-CaMKII	calcium/calmodulin-dependent protein kinase II, delta	protein-coding
Peaks_1715	chr1	48714885	48715313	+	0	NA	Intergenic	L1Md_T|LINE|L1	-1247974	NR_105768	102466969		NR_105768	ENSMUSG00000098876	Mir6350	Gm27958|mmu-mir-6350	microRNA 6350	ncRNA
Peaks_1396	chr1	18519748	18520946	+	0	NA	Intergenic	IAPEz-int|LTR|ERVK	-255209	NM_001040027	77673	Mm.99530	NM_183124	ENSMUSG00000067773	Defb41	9230102D03Rik|BD-17|Bd-41|Defb16|Defb17|Gm15386|OTTMUSG00000020946|OTTMUSG00000020948	defensin beta 41	protein-coding
Peaks_129	chr1	35794666	35795183	+	0	NA	Intergenic	IAPEz-int|LTR|ERVK	-273476	NM_015818	50785	Mm.213566	NM_015818	ENSMUSG00000045216	Hs6st1	6Ost1	heparan sulfate 6-O-sulfotransferase 1	protein-coding
Peaks_106	chr13	107698961	107699126	+	0	NA	Intergenic	Intergenic	11646	NR_045900	72257	Mm.234155	NR_045900	ENSMUSG00000102000	1700006H21Rik	-	RIKEN cDNA 1700006H21 gene	ncRNA
Peaks_1088	chr5	93979838	93979951	+	0	NA	Intergenic	IAPLTR4_I|LTR|ERVK	90651	NM_001270457	666203	Mm.380154	NM_001270457	ENSMUSG00000096139	Gm7978	EG666203	predicted gene 7978	protein-coding
Peaks_34	chr7	15150285	15151131	+	0	NA	Intergenic	Intergenic	-238143	NM_145708	246792	Mm.26391	NM_145708	ENSMUSG00000074369	Obox2	-	oocyte specific homeobox 2	protein-coding
Peaks_1143	chr1	88833235	88833602	+	0	NA	Intergenic	MERVL-int|LTR|ERVL	78528	NR_040493	78650	Mm.243767	NR_040493	ENSMUSG00000097398	Platr5	2410088K16Rik	pluripotency associated transcript 5	ncRNA
Peaks_1060	chr8	117021810	117021951	+	0	NA	exon (NM_029686, exon 32 of 43)	exon (NM_029686, exon 32 of 43)	-28431	NM_026572	68133	Mm.258462	NM_026572	ENSMUSG00000034424	Gcsh	1100001L02Rik|5730591C18Rik	glycine cleavage system protein H (aminomethyl carrier)	protein-coding
Peaks_440	chr3	63295271	63296240	+	0	NA	promoter-TSS (NM_008604)	promoter-TSS (NM_008604)	-117	NM_008604	17380	Mm.296022	NM_008604	ENSMUSG00000027820	Mme	6030454K05Rik|C85356|CALLA|CD10|NEP|SFE	membrane metallo endopeptidase	protein-coding
Peaks_68	chr17	4626109	4626533	+	0	NA	Intergenic	(CATTC)n|Simple_repeat|Simple_repeat	-8659	NR_130984	75117	Mm.429393	NR_130984		4930517M08Rik	-	RIKEN cDNA 4930517M08 gene	ncRNA
Peaks_223	chr1	16743480	16743976	+	0	NA	Intergenic	IAPEz-int|LTR|ERVK	55272	NM_016923	17087	Mm.116844	NM_016923	ENSMUSG00000025779	Ly96	ESOP-1|MD-2|MD2	lymphocyte antigen 96	protein-coding
Peaks_11	chr7	15157239	15157627	+	0	NA	Intergenic	L1_Mus3|LINE|L1	-231418	NM_145708	246792	Mm.26391	NM_145708	ENSMUSG00000074369	Obox2	-	oocyte specific homeobox 2	protein-coding
Peaks_666	chr1	103592139	103592366	+	0	NA	Intergenic	IAPEz-int|LTR|ERVK	-1176567	NM_011800	23836	Mm.103640	NM_011800	ENSMUSG00000050840	Cdh20	Cdh7	cadherin 20	protein-coding
Peaks_1253	chr7	102222275	102222604	+	0	NA	promoter-TSS (NM_145583)	promoter-TSS (NM_145583)	-589	NR_111938	233575	Mm.302013	NM_145583	ENSMUSG00000030990	Pgap2	1810006G21Rik|C76649|Frag1	post-GPI attachment to proteins 2	protein-coding
Peaks_1543	chr1	7881489	7882152	+	0	NA	Intergenic	RLTR13B2|LTR|ERVK	792900	NM_183028	319263	Mm.21539	NM_183028	ENSMUSG00000051285	Pcmtd1	8430411F12Rik|A030012M09Rik	protein-L-isoaspartate (D-aspartate) O-methyltransferase domain containing 1	protein-coding
Peaks_95	chr16	92933798	92934036	+	0	NA	Intergenic	Intergenic	-107843	NM_001111022	12394	Mm.4081	NM_009821	ENSMUSG00000022952	Runx1	AML1|CBF-alpha-2|Cbfa2|Pebp2a2|Pebpa2b	runt related transcription factor 1	protein-coding
Peaks_1636	chr1	74653466	74653697	+	0	NA	Intergenic	IAPLTR1_Mm|LTR|ERVK	-8173	NM_001014974	67534	Mm.260714	NM_001014974	ENSMUSG00000033257	Ttll4	4632407P03Rik|AI451681|mKIAA0173	tubulin tyrosine ligase-like family, member 4	protein-coding
Peaks_668	chr1	58816124	58816279	+	0	NA	intron (NM_001277926, intron 2 of 9)	IAPEz-int|LTR|ERVK	13699	NM_001080126	12370	Mm.336851	NM_009812	ENSMUSG00000026029	Casp8	CASP-8|FLICE|MACH|Mch5	caspase 8	protein-coding
Peaks_1743	chr12	35894298	35894699	+	0	NA	Intergenic	Intergenic	-31123	NM_207531	403205	Mm.190508	NM_207531	ENSMUSG00000036231	Agr3	BCMP11|E030025L21Rik|Gm888	anterior gradient 3	protein-coding
Peaks_518	chr1	64178269	64178404	+	0	NA	Intergenic	IAPLTR1a_Mm|LTR|ERVK	-56947	NM_033563	93691	Mm.29466	NM_033563	ENSMUSG00000025959	Klf7	9830124P08Rik	Kruppel-like factor 7 (ubiquitous)	protein-coding
Peaks_1295	chr1	16621988	16622090	+	0	NA	Intergenic	MT2_Mm|LTR|ERVL	-2701	NM_001271017	66799	Mm.122430	NM_025773	ENSMUSG00000025939	Ube2w	6130401J04Rik	ubiquitin-conjugating enzyme E2W (putative)	protein-coding
Peaks_676	chr7	98941626	98941855	+	0	NA	intron (NM_178635, intron 12 of 14)	G-rich|Low_complexity|Low_complexity	102895	NM_001285795	22411	Mm.22182	NM_009519	ENSMUSG00000015957	Wnt11	-	wingless-type MMTV integration site family, member 11	protein-coding
Peaks_1578	chr17	40880004	40880742	+	0	NA	exon (NM_027834, exon 1 of 2)	exon (NM_027834, exon 1 of 2)	185	NM_027834	71583	Mm.158733	NM_027834	ENSMUSG00000054951	9130008F23Rik	-	RIKEN cDNA 9130008F23 gene	protein-coding
Peaks_1390	chr1	35791031	35791183	+	0	NA	Intergenic	IAPEz-int|LTR|ERVK	-277293	NM_015818	50785	Mm.213566	NM_015818	ENSMUSG00000045216	Hs6st1	6Ost1	heparan sulfate 6-O-sulfotransferase 1	protein-coding
Peaks_767	chr1	144384565	144385050	+	0	NA	Intergenic	IAPEz-int|LTR|ERVK	-135703	NM_015811	50778	Mm.103701	NM_015811	ENSMUSG00000026358	Rgs1	BL34	regulator of G-protein signaling 1	protein-coding
Peaks_1721	chr9	94537096	94539025	+	0	NA	promoter-TSS (NM_001033145)	promoter-TSS (NM_001033145)	21	NM_001033145	68861	Mm.258746	NM_001033145	ENSMUSG00000045414	1190002N15Rik	GoPro49|HASF	RIKEN cDNA 1190002N15 gene	protein-coding
Peaks_151	chr2	108827281	108827995	+	0	NA	Intergenic	Intergenic	450652	NM_029790	76894	Mm.330451	NM_029790	ENSMUSG00000057234	Mettl15	0610027B03Rik|AI303697|AW049952|Mett5d1	methyltransferase like 15	protein-coding
Peaks_1017	chrX	49797429	49798131	+	0	NA	promoter-TSS (NM_177591)	promoter-TSS (NM_177591)	-35	NM_177591	209268	Mm.110505	NM_177591	ENSMUSG00000031111	Igsf1	5330413N23|5530402E03|AI747649|InhBP/p120|mKIAA0364	immunoglobulin superfamily, member 1	protein-coding
Peaks_304	chrX	141473642	141474096	+	0	NA	5' UTR (NM_053185, exon 1 of 45)	5' UTR (NM_053185, exon 1 of 45)	207	NM_053185	94216	Mm.155586	NM_053185	ENSMUSG00000031273	Col4a6	BB116301	collagen, type IV, alpha 6	protein-coding
Peaks_1146	chr1	82501216	82501766	+	0	NA	intron (NM_007735, intron 22 of 47)	IAPEz-int|LTR|ERVK	85358	NM_007735	12829	Mm.40253	NM_007735	ENSMUSG00000067158	Col4a4	E130010M05Rik|[a]4(IV)	collagen, type IV, alpha 4	protein-coding
Peaks_1480	chr6	148354509	148355024	+	0	NA	non-coding (NR_003634, exon 1 of 1)	non-coding (NR_003634, exon 1 of 1)	110	NR_003634	66184	Mm.391542	NM_025405	ENSMUSG00000063171	Rps4l	1110033J19Rik|AA407494|Rps4y2	ribosomal protein S4-like	pseudo
Peaks_1375	chr4	115000441	115000752	+	0	NA	intron (NM_001304559, intron 1 of 15)	intron (NM_001304559, intron 1 of 15)	478	NM_001304555	20460	Mm.3988	NM_009185	ENSMUSG00000028718	Stil	Sil	Scl/Tal1 interrupting locus	protein-coding
Peaks_509	chr1	54619000	54619277	+	0	NA	Intergenic	IAPLTR1_Mm|LTR|ERVK	-61454	NM_001163314	241062	Mm.103539	NM_175508	ENSMUSG00000073678	Pgap1	5033403E17Rik|9030223K07Rik|A530084K22|D230012E17Rik|oto	post-GPI attachment to proteins 1	protein-coding
Peaks_670	chr1	20702808	20703959	+	0	NA	Intergenic	MTA_Mm-int|LTR|ERVL-MaLR	20614	NR_029902	723817		NR_029902	ENSMUSG00000065480	Mir133b	Mirn133b|mir-133b	microRNA 133b	ncRNA
Peaks_1713	chr10	22843576	22843892	+	0	NA	Intergenic	Intergenic	-23606	NM_011545	21412	Mm.16497	NM_011545	ENSMUSG00000045680	Tcf21	Pod-1|Pod1|bHLHa23|capsulin|epc|epicardin	transcription factor 21	protein-coding
Peaks_437	chr1	29645525	29646270	+	0	NA	Intergenic	MERVL-int|LTR|ERVL	224409	NR_105760	102465174		NR_105760	ENSMUSG00000099257	Mir6342	Gm27268|mmu-mir-6342	microRNA 6342	ncRNA
Peaks_1799	chr4	87785168	87785723	+	0	NA	intron (NM_001286158, intron 4 of 5)	intron (NM_001286158, intron 4 of 5)	20878	NM_001286158	70122	Mm.288898	NM_027326	ENSMUSG00000028496	Mllt3	2210011H10Rik|2610012I03Rik|3830408D16Rik|Af9|D4Ertd321e	myeloid/lymphoid or mixed-lineage leukemia; translocated to, 3	protein-coding
Peaks_169	chr1	18761211	18762166	+	0	NA	Intergenic	RLTR10-int|LTR|ERVK	-341334	NM_153154	226896	Mm.244858	NM_153154	ENSMUSG00000042596	Tfap2d	Tcfap2d	transcription factor AP-2, delta	protein-coding
Peaks_530	chr1	32485284	32486763	+	0	NA	intron (NM_133235, intron 6 of 8)	MTA_Mm-int|LTR|ERVL-MaLR	34976	NM_001199956	408192	Mm.485769	NM_001199956		Gm9839	ENSMUSG00000049830|Senp15	predicted gene 9839	protein-coding
Peaks_1333	chr1	5423717	5424584	+	0	NA	Intergenic	L1Md_T|LINE|L1	-164343	NM_011011	18387	Mm.7977	NM_011011	ENSMUSG00000025905	Oprk1	K-OR-1|KOR|KOR-1|MSL-1|Oprk2|R21	opioid receptor, kappa 1	protein-coding
Peaks_772	chr5	105458002	105458262	+	0	NA	intron (NM_001033550, intron 1 of 4)	intron (NM_001033550, intron 1 of 4)	42357	NM_001033550	433926	Mm.439781	NM_001033550	ENSMUSG00000070639	Lrrc8b	R75581|Ta-lrrp|mKIAA0231	leucine rich repeat containing 8 family, member B	protein-coding
Peaks_423	chr8	94330796	94331075	+	0	NA	intron (NM_019415, intron 2 of 24)	intron (NM_019415, intron 2 of 24)	1727	NM_001205311	20497	Mm.25804	NM_019415	ENSMUSG00000031766	Slc12a3	AI035291|NCC|NCCT|TSC	solute carrier family 12, member 3	protein-coding
Peaks_388	chr4	28413153	28413301	+	0	NA	Intergenic	IAPEz-int|LTR|ERVK	-399904	NM_001290434	13841	Mm.257266	NM_010141	ENSMUSG00000028289	Epha7	Cek11|Ebk|Ehk3|Hek11|Mdk1	Eph receptor A7	protein-coding
Peaks_1343	chr9	116328247	116328460	+	0	NA	Intergenic	Intergenic	-152990	NM_009371	21813	Mm.172346	NM_009371	ENSMUSG00000032440	Tgfbr2	1110020H15Rik|AU042018|DNIIR|RIIDN|TBR-II|TbetaR-II|TbetaRII	transforming growth factor, beta receptor II	protein-coding
Peaks_1186	chr1	15367575	15367854	+	0	NA	intron (NM_001098528, intron 1 of 1)	IAPLTR2a2_Mm|LTR|ERVK	55262	NM_001098528	98741	Mm.156081	NM_001033195	ENSMUSG00000092083	Kcnb2	9630047L19Rik|BB130875|Kv2.2	potassium voltage gated channel, Shab-related subfamily, member 2	protein-coding
Peaks_536	chr7	59731625	59731937	+	0	NA	Intergenic	Intergenic	-5529	NR_033778	64244		NR_033778	ENSMUSG00000096475	Snord116l1	Pwcr1l1	small nucleolar RNA, C/D box 116-like 1	snoRNA
Peaks_1256	chr15	40654602	40655747	+	0	NA	5' UTR (NM_011766, exon 1 of 8)	5' UTR (NM_011766, exon 1 of 8)	132	NM_011766	22762	Mm.39496	NM_011766	ENSMUSG00000022306	Zfpm2	B330005D23Rik|FOG-2|FOG2	zinc finger protein, multitype 2	protein-coding
Peaks_1166	chr1	14478916	14479336	+	0	NA	Intergenic	L1Md_T|LINE|L1	-168927	NM_010164	14048	Mm.250185	NM_010164	ENSMUSG00000025932	Eya1	bor	EYA transcriptional coactivator and phosphatase 1	protein-coding
Peaks_939	chr1	34350573	34350934	+	0	NA	Intergenic	IAPEz-int|LTR|ERVK	82446	NR_039562	100628580		NR_039562	ENSMUSG00000092852	Mir5103	mir-5103|mmu-mir-5103|mu-mir-5103	microRNA 5103	ncRNA
Peaks_483	chr5	130938296	130938911	+	0	NA	intron (NM_145218, intron 6 of 10)	intron (NM_145218, intron 6 of 10)	368919	NM_145218	212996	Mm.299204	NM_145218	ENSMUSG00000034040	Wbscr17	AA388321|E330012B09Rik	Williams-Beuren syndrome chromosome region 17 homolog (human)	protein-coding
Peaks_1065	chr1	34915544	34916537	+	0	NA	Intergenic	IAPEz-int|LTR|ERVK	66081	NM_145516	226971	Mm.292751	NM_145516	ENSMUSG00000026123	Plekhb2	2310009M15Rik|AU018239|Evt2|Phdc|evt-2	pleckstrin homology domain containing, family B (evectins) member 2	protein-coding
Peaks_963	chr10	75093587	75093950	+	0	NA	intron (NM_001081412, intron 1 of 22)	L1MB3|LINE|L1	32872	NM_001081412	110279	Mm.333722	NM_001081412	ENSMUSG00000009681	Bcr	5133400C09Rik|AI561783|AI853148|mKIAA3017	breakpoint cluster region	protein-coding
Peaks_794	chr1	140245394	140246404	+	0	NA	promoter-TSS (NM_001081027)	promoter-TSS (NM_001081027)	-358	NM_001081027	240776	Mm.483845	NM_001081027	ENSMUSG00000052726	Kcnt2	E330038N15Rik|Slick	potassium channel, subfamily T, member 2	protein-coding
Peaks_351	chr5	93860500	93860741	+	0	NA	Intergenic	RLTR48A|LTR|ERV1	-189157	NM_001164285	381654	Mm.326591	NM_001164284	ENSMUSG00000070686	C87414	-	expressed sequence C87414	protein-coding
Peaks_16	chr7	15139459	15140346	+	0	NA	Intergenic	Intergenic	-248949	NM_145708	246792	Mm.26391	NM_145708	ENSMUSG00000074369	Obox2	-	oocyte specific homeobox 2	protein-coding
Peaks_657	chr5	139324995	139325778	+	0	NA	promoter-TSS (NM_172723)	promoter-TSS (NM_172723)	78	NM_172723	231821	Mm.297819	NM_172723	ENSMUSG00000056413	Adap1	4930431P11Rik|Centa1|GC1L|p42IP4	ArfGAP with dual PH domains 1	protein-coding
Peaks_230	chr9	115496561	115496944	+	0	NA	Intergenic	Intergenic	114933	NR_130329	100316675		NR_130329	ENSMUSG00000080409	Mir467h	Mirn467h|mmu-mir-467h	microRNA 467h	ncRNA
Peaks_449	chr1	166179415	166180042	+	0	NA	Intergenic	MMERVK10C-int|LTR|ERVK	49268	NM_021610	59290	Mm.46357	NM_021610	ENSMUSG00000000544	Gpa33	2010310L10Rik|2210401D16Rik|BB116197	glycoprotein A33 (transmembrane)	protein-coding
Peaks_192	chr1	32141654	32141817	+	0	NA	Intergenic	L1Md_F2|LINE|L1	-31071	NM_133235	170771	Mm.336594	NM_133235	ENSMUSG00000026058	Khdrbs2	6330586C16Rik|Slim1|Slm-1|Slm1|mSLM-1	KH domain containing, RNA binding, signal transduction associated 2	protein-coding
Peaks_1505	chr1	52319329	52319427	+	0	NA	Intergenic	MMERGLN-int|LTR|ERV1	-86146	NM_001113383	14660	Mm.398608	NM_001081081	ENSMUSG00000026103	Gls	6330442B14|AI314027|B230365M23Rik	glutaminase	protein-coding
Peaks_278	chr1	87744041	87744400	+	0	NA	Intergenic	MERVL-int|LTR|ERVL	-11791	NM_029846	77040	Mm.272972	NM_029846	ENSMUSG00000026289	Atg16l1	1500009K01Rik|Apg16l|Atg16l|WDR30	autophagy related 16-like 1 (S. cerevisiae)	protein-coding
Peaks_871	chr1	4566651	4566873	+	0	NA	Intergenic	L1Md_T|LINE|L1	-69408	NM_001289465	20671	Mm.279103	NM_011441	ENSMUSG00000025902	Sox17	-	SRY (sex determining region Y)-box 17	protein-coding
Peaks_1154	chr1	139942585	139942979	+	0	NA	Intergenic	L1Md_F2|LINE|L1	-84083	NM_001025575	545366	Mm.439660	NM_001025575	ENSMUSG00000033898	Cfhr2	Cfhrb_4/2	complement factor H-related 2	protein-coding
Peaks_488	chr2	77899874	77900110	+	0	NA	intron (NM_172667, intron 19 of 19)	RLTR21|LTR|ERVK	46364	NM_001290740	80744	Mm.288151	NM_030560	ENSMUSG00000027014	Cwc22	AA684037|AI173004|AL022752|B230213M24|mKIAA1604	CWC22 spliceosome-associated protein	protein-coding
Peaks_1585	chr14	6756301	6757581	+	0	NA	intron (NM_001309401, intron 1 of 4)	CpG	116	NM_001309401	100041151	Mm.396155	NM_001309401	ENSMUSG00000091754	Gm3636	100042043	predicted gene 3636	protein-coding
Peaks_1308	chr1	121327193	121327539	+	0	NA	intron (NM_178082, intron 1 of 5)	intron (NM_178082, intron 1 of 5)	312	NM_001271531	72999	Mm.27136	NM_133748	ENSMUSG00000003721	Insig2	2900053I11Rik|C730043J18Rik|Insig-2	insulin induced gene 2	protein-coding
Peaks_714	chr2	170315988	170316363	+	0	NA	Intergenic	ORR1A0-int|LTR|ERVL-MaLR	-40186	NR_040610	73303	Mm.443297	NR_040610	ENSMUSG00000086999	Bcas1os2	1700040N02Rik	breast carcinoma amplified sequence 1, opposite strand 2	ncRNA
Peaks_563	chr1	19805206	19805750	+	0	NA	Intergenic	L1Md_T|LINE|L1	-550976	NR_045734	75028	Mm.417820	NR_045734	ENSMUSG00000089914	4930486I03Rik	-	RIKEN cDNA 4930486I03 gene	ncRNA
Peaks_1623	chr1	53507255	53507668	+	0	NA	intron (NM_001252070, intron 41 of 65)	IAPEz-int|LTR|ERVK	-154709	NM_133728	70396	Mm.285783	NM_133728	ENSMUSG00000026095	Asnsd1	2210409M21Rik	asparagine synthetase domain containing 1	protein-coding
Peaks_1484	chr10	112315248	112315534	+	0	NA	intron (NM_001025581, intron 2 of 4)	MIR3|SINE|MIR	44268	NM_001025581	268345	Mm.336242	NM_001025581	ENSMUSG00000035681	Kcnc2	AW047325|B230117I07|KShIIIA|Kv3.2	potassium voltage gated channel, Shaw-related subfamily, member 2	protein-coding
Peaks_1218	chr8	11419593	11419912	+	0	NA	intron (NM_009932, intron 20 of 47)	PB1D7|SINE|Alu	-58177	NR_126558	102132	Mm.37632	NR_126558	ENSMUSG00000096957	E230013L22Rik	AI645545	RIKEN cDNA E230013L22 gene	ncRNA
Peaks_694	chr17	80468414	80468803	+	0	NA	intron (NM_009231, intron 1 of 21)	(CACAC)n|Simple_repeat|Simple_repeat	11845	NM_009231	20662	Mm.60975	NM_009231	ENSMUSG00000024241	Sos1	4430401P03Rik|9630010N06|AI449023	son of sevenless homolog 1 (Drosophila)	protein-coding
Peaks_895	chr4	154081074	154081467	+	0	NA	intron (NM_001126331, intron 2 of 9)	CpG	15903	NM_001126330	22062	Mm.78015	NM_011642	ENSMUSG00000029026	Trp73	TAp73|Tp73|deltaNp73|p73	transformation related protein 73	protein-coding
Peaks_1718	chr1	7606254	7606508	+	0	NA	Intergenic	MTA_Mm-int|LTR|ERVL-MaLR	517461	NM_183028	319263	Mm.21539	NM_183028	ENSMUSG00000051285	Pcmtd1	8430411F12Rik|A030012M09Rik	protein-L-isoaspartate (D-aspartate) O-methyltransferase domain containing 1	protein-coding
Peaks_1535	chr1	64183403	64183721	+	0	NA	Intergenic	IAPEz-int|LTR|ERVK	-62173	NM_033563	93691	Mm.29466	NM_033563	ENSMUSG00000025959	Klf7	9830124P08Rik	Kruppel-like factor 7 (ubiquitous)	protein-coding
Peaks_824	chr1	8712712	8713318	+	0	NA	intron (NM_027671, intron 6 of 20)	MTA_Mm-int|LTR|ERVL-MaLR	586862	NM_001290390	71096	Mm.336395	NM_027671	ENSMUSG00000025909	Sntg1	4933426D16Rik|G1SYN|SYN4	syntrophin, gamma 1	protein-coding
Peaks_907	chr1	6691406	6691919	+	0	NA	intron (NM_001244693, intron 2 of 22)	RLTR10-int|LTR|ERVK	-38389	NR_045189	240690	Mm.234612	NM_173868	ENSMUSG00000033740	St18	AV348974|Myt3|NZF-3|Nzf3|mKIAA0535	suppression of tumorigenicity 18	protein-coding
Peaks_565	chr4	148229805	148229983	+	0	NA	Intergenic	Intergenic	58071	NM_001083342	242748	Mm.33873	NM_001083342	ENSMUSG00000041544	Ptchd2	Disp3|G630052C06Rik|RNDEu-2	patched domain containing 2	protein-coding
Peaks_972	chr14	46256373	46256658	+	0	NA	Intergenic	Intergenic	-123009	NR_037981	100041724	Mm.383311	NM_001099324	ENSMUSG00000079261	Gm15217	OTTMUSG00000019524	predicted gene 15217	ncRNA
Peaks_385	chr2	48441172	48441684	+	0	NA	Intergenic	Intergenic	-372681	NM_007396	11480	Mm.314338	NM_007396	ENSMUSG00000052155	Acvr2a	ActrIIa|Acvr2|TactrII	activin receptor IIA	protein-coding
Peaks_1194	chr5	7344056	7345405	+	0	NA	promoter-TSS (NM_001163223)	promoter-TSS (NM_001163223)	-352	NM_001163223	207618	Mm.478808	NM_001163223	ENSMUSG00000092094	Zfp804b	Gm441	zinc finger protein 804B	protein-coding
Peaks_468	chr2	139608682	139609247	+	0	NA	intron (NM_175467, intron 10 of 12)	intron (NM_175467, intron 10 of 12)	-69214	NM_001276489	319909	Mm.41113	NM_001126490	ENSMUSG00000074766	Ism1	5430433G21Rik|Ism	isthmin 1, angiogenesis inhibitor	protein-coding
Peaks_748	chr5	36660832	36661254	+	0	NA	intron (NM_001081232, intron 2 of 8)	intron (NM_001081232, intron 2 of 8)	34978	NM_001081232	320661	Mm.26480	NM_177221	ENSMUSG00000029190	D5Ertd579e	9030221A05Rik|A930018H20Rik|Kiaa0232	DNA segment, Chr 5, ERATO Doi 579, expressed	protein-coding
Peaks_1219	chr1	114607873	114608429	+	0	NA	Intergenic	MERVL-int|LTR|ERVL	-1076986	NM_001077425	636808	Mm.101576	NM_001077425	ENSMUSG00000070695	Cntnap5a	Caspr5-1|EG636808	contactin associated protein-like 5A	protein-coding
Peaks_715	chr1	81565429	81565679	+	0	NA	Intergenic	IAPEz-int|LTR|ERVK	488237	NM_172849	241134	Mm.313904	NM_172849	ENSMUSG00000054976	Nyap2	9430031J16Rik|Jr6|Kiaa1486	neuronal tyrosine-phophorylated phosphoinositide 3-kinase adaptor 2	protein-coding
Peaks_273	chr1	10732750	10732993	+	0	NA	intron (NR_030645, intron 2 of 3)	IAPEz-int|LTR|ERVK	-12926	NM_177834	329093	Mm.336423	NM_177834	ENSMUSG00000042501	Cpa6	9030616D13Rik	carboxypeptidase A6	protein-coding
Peaks_1122	chr4	53439894	53441107	+	0	NA	promoter-TSS (NM_001159633)	promoter-TSS (NM_001159633)	87	NM_133891	100434	Mm.482207	NM_133891	ENSMUSG00000028412	Slc44a1	2210409B22Rik|4833416H08Rik|AW547365|CHTL1|CTL1|Cdw92	solute carrier family 44, member 1	protein-coding
Peaks_989	chr14	53032593	53032915	+	0	NA	Intergenic	Intergenic	-537059	NM_001170918	57269	Mm.88822	NM_020512	ENSMUSG00000059887	Olfr1507	MOR244-1|Mor28|Or28	olfactory receptor 1507	protein-coding
Peaks_285	chr10	100152848	100153101	+	0	NA	Intergenic	Intergenic	137153	NM_013598	17311	Mm.45124	NM_013598	ENSMUSG00000019966	Kitl	Clo|Con|Gb|Kitlg|Mgf|SCF|SF|SLF|Sl|blz|contrasted	kit ligand	protein-coding
Peaks_1688	chr8	3567711	3568148	+	0	NA	promoter-TSS (NM_001024728)	promoter-TSS (NM_001024728)	-69	NM_001024728	546049	Mm.358733	NM_001024728	ENSMUSG00000065952	C330021F23Rik	2610027C06Rik|Rps23r1|Rps23rg1	RIKEN cDNA C330021F23 gene	protein-coding
Peaks_585	chr1	18254131	18254484	+	0	NA	intron (NM_183124, intron 1 of 1)	IAPEz-int|LTR|ERVK	10831	NM_183124	77673	Mm.99530	NM_183124	ENSMUSG00000067773	Defb41	9230102D03Rik|BD-17|Bd-41|Defb16|Defb17|Gm15386|OTTMUSG00000020946|OTTMUSG00000020948	defensin beta 41	protein-coding
Peaks_131	chr1	56777323	56777659	+	0	NA	Intergenic	IAPEz-int|LTR|ERVK	-140040	NM_027661	71066	Mm.152656	NM_027661	ENSMUSG00000045336	Hsfy2	4933413G11Rik|Hspy2l	heat shock transcription factor, Y-linked 2	protein-coding
Peaks_1181	chr9	86925835	86926055	+	0	NA	Intergenic	Intergenic	-45496	NM_001277983	20616	Mm.281651	NM_013669	ENSMUSG00000033419	Snap91	91kDa|AP180|F1-20|mKIAA0656	synaptosomal-associated protein 91	protein-coding
Peaks_403	chr1	3501155	3501706	+	0	NA	intron (NM_001011874, intron 1 of 2)	L1Md_T|LINE|L1	170068	NM_001011874	497097	Mm.454496	NM_001011874	ENSMUSG00000051951	Xkr4	AY534250|Gm210|XRG4|mKIAA1889	X-linked Kx blood group related 4	protein-coding
Peaks_25	chr12	118703258	118703601	+	0	NA	Intergenic	Intergenic	-142900	NM_177082	320145	Mm.51682	NM_177082	ENSMUSG00000048562	Sp8	D930049B17Rik|mBtd	trans-acting transcription factor 8	protein-coding
Peaks_1003	chr1	24727527	24727722	+	0	NA	intron (NM_001310483, intron 7 of 15)	L1Md_T|LINE|L1	48706	NM_001310483	68421	Mm.336563	NM_026719	ENSMUSG00000073725	Lmbrd1	0910001K20Rik|AV347960	LMBR1 domain containing 1	protein-coding
Peaks_515	chrX	169972237	169972482	+	0	NA	intron (NM_001290512, intron 3 of 9)	RMER10A|LTR|ERVL	6558	NR_029457	654820	Mm.34441	NM_001039559	ENSMUSG00000072844	G530011O06Rik	-	RIKEN cDNA G530011O06 gene	ncRNA
Peaks_1741	chr14	54239106	54239375	+	0	NA	TTS (NM_010015)	TTS (NM_010015)	14689	NM_001113358	13135	Mm.319038	NM_010015	ENSMUSG00000022174	Dad1	AI323713	defender against cell death 1	protein-coding
Peaks_502	chr3	96401669	96402402	+	0	NA	Intergenic	CpG	12798	NR_001579	21748		NR_001579	ENSMUSG00000064796	Terc	mTER|mTR	telomerase RNA component	ncRNA
Peaks_141	chr8	98752319	98752754	+	0	NA	Intergenic	Intergenic	-259351	NR_110579	100873092	Mm.414599	NR_110579	ENSMUSG00000089819	Gm15679	OTTMUSG00000025218	predicted gene 15679	ncRNA
Peaks_1608	chr10	83471770	83471889	+	0	NA	Intergenic	IAPEz-int|LTR|ERVK	62311	NM_153543	216188	Mm.263138	NM_153543	ENSMUSG00000020256	Aldh1l2	D330038I09Rik|mtFDH	aldehyde dehydrogenase 1 family, member L2	protein-coding
Peaks_292	chr1	51370371	51370647	+	0	NA	Intergenic	RLTR10C|LTR|ERVK	-36730	NR_045151	442821	Mm.118030	NR_045151	ENSMUSG00000101799	9330175M20Rik	-	RIKEN cDNA 9330175M20 gene	ncRNA
Peaks_646	chr3	52613116	52613850	+	0	NA	Intergenic	Intergenic	-126241	NR_038079	329639	Mm.131245	NR_038079	ENSMUSG00000102785	Gm2447	100039832|A530017F20	predicted gene 2447	ncRNA
Peaks_473	chr1	149599660	149599857	+	0	NA	Intergenic	MT2_Mm|LTR|ERVL	322681	NM_001305632	18783	Mm.4186	NM_008869	ENSMUSG00000056220	Pla2g4a	Pla2g4|cPLA2|cPLA2-alpha|cPLA2alpha	phospholipase A2, group IVA (cytosolic, calcium-dependent)	protein-coding
Peaks_8	chr1	24611627	24612601	+	0	NA	Intergenic	Intergenic	-24677	NM_007733	12823	Mm.329196	NM_007733	ENSMUSG00000026141	Col19a1	-	collagen, type XIX, alpha 1	protein-coding
Peaks_631	chr1	107797128	107797439	+	0	NA	Intergenic	MERVL-int|LTR|ERVL	-119976	NR_102306	319596	Mm.136054	NR_102306	ENSMUSG00000100457	D830032E09Rik	-	RIKEN cDNA D830032E09 gene	ncRNA
Peaks_1600	chr1	90989698	90990218	+	0	NA	Intergenic	MMERVK10C-int|LTR|ERVK	-8769	NM_001111312	16978	Mm.45039	NM_008515	ENSMUSG00000026305	Lrrfip1	AU024550|Fliiap1	leucine rich repeat (in FLII) interacting protein 1	protein-coding
Peaks_1029	chr5	14978388	14978838	+	0	NA	TTS (NR_001584)	TTS (NR_001584)	286	NM_001281514	100503549	Mm.491086	NM_001281514	ENSMUSG00000072188	Gm10354	ENSMUSG00000072188	predicted gene 10354	protein-coding
Peaks_733	chr16	72027603	72028282	+	0	NA	Intergenic	Intergenic	206385	NR_131116	319533	Mm.373754	NR_131115		8030451O07Rik	-	RIKEN cDNA 8030451O07 gene	ncRNA
Peaks_1638	chr10	17202891	17203247	+	0	NA	Intergenic	Intergenic	-107287	NR_038020	100504235	Mm.84044	NR_038020	ENSMUSG00000101969	Gm20125	-	predicted gene, 20125	ncRNA
Peaks_442	chr7	7188215	7188635	+	0	NA	Intergenic	Intergenic	17072	NM_146179	232854	Mm.184857	NM_146179	ENSMUSG00000034538	Zfp418	A230102I05Rik	zinc finger protein 418	protein-coding
Peaks_419	chr1	104768391	104769790	+	0	NA	intron (NM_011800, intron 1 of 11)	intron (NM_011800, intron 1 of 11)	271	NM_011800	23836	Mm.103640	NM_011800	ENSMUSG00000050840	Cdh20	Cdh7	cadherin 20	protein-coding
Peaks_572	chr14	3136522	3136648	+	0	NA	Intergenic	Intergenic	-51699	NM_001270806	544990	Mm.360540	NM_001270806	ENSMUSG00000079409	Gm5795	-	predicted gene 5795	protein-coding
Peaks_1377	chr10	17333597	17333934	+	0	NA	Intergenic	Intergenic	-237983	NR_038020	100504235	Mm.84044	NR_038020	ENSMUSG00000101969	Gm20125	-	predicted gene, 20125	ncRNA
Peaks_347	chr4	80003131	80003210	+	0	NA	Intergenic	Intergenic	-831043	NM_031202	22178	Mm.30438	NM_031202	ENSMUSG00000005994	Tyrp1	Oca3|TRP-1|TRP1|Tyrp|b|brown|isa	tyrosinase-related protein 1	protein-coding
Peaks_1268	chr1	16891946	16892449	+	0	NA	Intergenic	MT2_Mm|LTR|ERVL	203741	NM_016923	17087	Mm.116844	NM_016923	ENSMUSG00000025779	Ly96	ESOP-1|MD-2|MD2	lymphocyte antigen 96	protein-coding
Peaks_1111	chr1	16622144	16622464	+	0	NA	Intergenic	MT2_Mm|LTR|ERVL	-2966	NM_001271017	66799	Mm.122430	NM_025773	ENSMUSG00000025939	Ube2w	6130401J04Rik	ubiquitin-conjugating enzyme E2W (putative)	protein-coding
Peaks_316	chr17	81669144	81670620	+	0	NA	intron (NR_104580, intron 1 of 8)	(CA)n|Simple_repeat|Simple_repeat	68505	NM_001286684	20541	Mm.265834	NM_011406	ENSMUSG00000054640	Slc8a1	AI852629|AV344025|D930008O12Rik|Ncx1	solute carrier family 8 (sodium/calcium exchanger), member 1	protein-coding
Peaks_681	chr10	107562930	107563266	+	0	NA	intron (NM_001081432, intron 35 of 44)	intron (NM_001081432, intron 35 of 44)	-68369	NM_008657	17878	Mm.11	NM_008657	ENSMUSG00000035923	Myf6	MRF4|bHLHc4|herculin	myogenic factor 6	protein-coding
Peaks_1411	chr2	133554290	133554981	+	0	NA	exon (NM_007553, exon 2 of 3)	exon (NM_007553, exon 2 of 3)	2476	NM_007553	12156	Mm.103205	NM_007553	ENSMUSG00000027358	Bmp2	AI467020|Bmp2a	bone morphogenetic protein 2	protein-coding
Peaks_1351	chr19	14855081	14855328	+	0	NA	Intergenic	Intergenic	-257021	NM_001302947	21888	Mm.103638	NM_011600	ENSMUSG00000024642	Tle4	5730411M05Rik|AA792082|Bce-1|Bce1|ESTM13|ESTM14|Grg4|X83332|X83333|grg-4	transducin-like enhancer of split 4	protein-coding
Peaks_1012	chr10	83954424	83954694	+	0	NA	Intergenic	(CATTC)n|Simple_repeat|Simple_repeat	231694	NM_001145198	69784	Mm.271188	NM_001145198	ENSMUSG00000087651	1500009L16Rik	2700050C19Rik|OCC-1	RIKEN cDNA 1500009L16 gene	protein-coding
Peaks_1200	chr1	87134050	87134343	+	0	NA	Intergenic	IAPLTR1_Mm|LTR|ERVK	9188	NM_007432	11648	Mm.377076	NM_007432	ENSMUSG00000036500	Akp3	Akp-3|IAP|dIAP	alkaline phosphatase 3, intestine, not Mn requiring	protein-coding
Peaks_878	chr1	5250734	5250853	+	0	NA	Intergenic	MERVL-int|LTR|ERVL	167707	NM_001310442	108664	Mm.27082	NM_133826	ENSMUSG00000033793	Atp6v1h	0710001F19Rik|AU022349|CGI-11|SFD|SFDalpha|SFDbeta|VMA13	ATPase, H+ transporting, lysosomal V1 subunit H	protein-coding
Peaks_478	chr8	20152905	20153340	+	0	NA	Intergenic	LTRIS2|LTR|ERV1	144310	NR_030708	547150	Mm.359054	NR_030708	ENSMUSG00000071796	6820431F20Rik	-	cadherin 11 pseudogene	pseudo
Peaks_234	chr1	6948662	6949124	+	0	NA	Intergenic	L1Md_F2|LINE|L1	-140027	NM_183028	319263	Mm.21539	NM_183028	ENSMUSG00000051285	Pcmtd1	8430411F12Rik|A030012M09Rik	protein-L-isoaspartate (D-aspartate) O-methyltransferase domain containing 1	protein-coding
Peaks_1384	chr6	114497932	114498219	+	0	NA	Intergenic	IMPB_01|Satellite|Satellite	39553	NM_001317124	15465	Mm.333327	NM_008285	ENSMUSG00000053004	Hrh1	Bphs|H1R|HH1R|Hir	histamine receptor H1	protein-coding
Peaks_73	chr4	156356463	156358040	+	0	NA	Intergenic	Intergenic	26125	NM_009485	22300	Mm.377117	NM_009485		Vmn2r123	V2r1	vomeronasal 2, receptor 123	protein-coding
Peaks_1476	chr10	125786180	125786519	+	0	NA	Intergenic	Intergenic	-179870	NM_177152	320398	Mm.275586	NM_177152	ENSMUSG00000020105	Lrig3	9030421L11Rik|9130004I02Rik|9430095K15Rik|mKIAA3016	leucine-rich repeats and immunoglobulin-like domains 3	protein-coding
Peaks_1496	chr4	156077438	156078416	+	0	NA	Intergenic	CpG	-18125	NR_132444	100415901	Mm.437006	NR_132444	ENSMUSG00000086549	Gm13648	OTTMUSG00000013217	predicted gene 13648	ncRNA
Peaks_101	chr1	10890677	10892387	+	0	NA	Intergenic	MERVL-int|LTR|ERVL	-25658	NR_030645	100124448		NR_030645	ENSMUSG00000076948	Mir467e	Mirn467e	microRNA 467e	ncRNA
Peaks_410	chr14	3145198	3145813	+	0	NA	Intergenic	Lx|LINE|L1	-42779	NM_001270806	544990	Mm.360540	NM_001270806	ENSMUSG00000079409	Gm5795	-	predicted gene 5795	protein-coding
Peaks_1314	chrX	89520652	89520754	+	0	NA	Intergenic	IAPLTR2a2_Mm|LTR|ERVK	-111014	NM_008821	18630	Mm.3086	NM_008821	ENSMUSG00000035395	Pet2	PC231|PC326|Pex3	plasmacytoma expressed transcript 2	protein-coding
Peaks_1703	chr8	84113311	84113602	+	0	NA	Intergenic	Intergenic	-8694	NM_172502	212123	Mm.260557	NM_172502	ENSMUSG00000037103	Dcaf15	6720484B16	DDB1 and CUL4 associated factor 15	protein-coding
Peaks_1244	chr14	104467311	104468250	+	0	NA	5' UTR (NM_011143, exon 1 of 3)	5' UTR (NM_011143, exon 1 of 3)	219	NM_011143	18996	Mm.246550	NM_011143	ENSMUSG00000048349	Pou4f1	Brn-3|Brn-3.0|Brn3|Brn3.0|Brn3a|E130119J07Rik	POU domain, class 4, transcription factor 1	protein-coding
Peaks_1331	chr1	35794170	35794310	+	0	NA	Intergenic	IAPEz-int|LTR|ERVK	-274160	NM_015818	50785	Mm.213566	NM_015818	ENSMUSG00000045216	Hs6st1	6Ost1	heparan sulfate 6-O-sulfotransferase 1	protein-coding
Peaks_262	chr1	8639221	8639825	+	0	NA	intron (NM_027671, intron 10 of 20)	L1Md_T|LINE|L1	660354	NM_001290390	71096	Mm.336395	NM_027671	ENSMUSG00000025909	Sntg1	4933426D16Rik|G1SYN|SYN4	syntrophin, gamma 1	protein-coding
Peaks_854	chr1	47224349	47224567	+	0	NA	Intergenic	IAPEz-int|LTR|ERVK	242667	NR_105768	102466969		NR_105768	ENSMUSG00000098876	Mir6350	Gm27958|mmu-mir-6350	microRNA 6350	ncRNA
Peaks_1013	chr1	16741664	16741883	+	0	NA	Intergenic	IAPEz-int|LTR|ERVK	53317	NM_016923	17087	Mm.116844	NM_016923	ENSMUSG00000025779	Ly96	ESOP-1|MD-2|MD2	lymphocyte antigen 96	protein-coding
Peaks_1820	chr10	127380243	127381479	+	0	NA	Intergenic	GC_rich|Low_complexity|Low_complexity	-9450	NM_001168292	71750	Mm.29342	NM_027900	ENSMUSG00000025404	R3hdm2	1300003K24Rik|AU041262|mKIAA1002	R3H domain containing 2	protein-coding
Peaks_574	chr6	13224576	13225136	+	0	NA	exon (NM_001013757, exon 1 of 12)	exon (NM_001013757, exon 1 of 12)	109	NM_001013757	232585	Mm.389082	NM_001013757	ENSMUSG00000079679	Vwde	Gm467	von Willebrand factor D and EGF domains	protein-coding
Peaks_1236	chr1	70234594	70234882	+	0	NA	intron (NM_029160, intron 11 of 16)	MT2_Mm|LTR|ERVL	283123	NM_025728	66722	Mm.440554	NM_025728	ENSMUSG00000053153	Spag16	4921511D23Rik|4930524F24Rik|4930585K05Rik|AV261009|Pf20|Wdr29	sperm associated antigen 16	protein-coding
Peaks_553	chr13	78871165	78871722	+	0	NA	Intergenic	Intergenic	-672570	NM_010151	13865	Mm.439653	NM_010151	ENSMUSG00000069171	Nr2f1	COUP-TF1|COUP-TFI|COUPTFA|EAR-3|EAR3|Erbal3|SVP44|Tcfcoup1	nuclear receptor subfamily 2, group F, member 1	protein-coding
Peaks_213	chr4	10136841	10137365	+	0	NA	Intergenic	Intergenic	-219706	NR_004448	74662	Mm.483401	NR_004448	ENSMUSG00000082843	4930448K20Rik	1700009K09Rik	glyceraldehyde-3-phosphate dehydrogenase pseudogene	pseudo
Peaks_995	chr16	84955334	84955868	+	0	NA	intron (NM_007471, intron 15 of 15)	intron (NM_007471, intron 15 of 15)	-16610	NR_045889	100038614	Mm.441351	NR_045889		Gm10791	ENSMUSG00000074933	predicted gene 10791	ncRNA
Peaks_1739	chr1	9175381	9176320	+	0	NA	intron (NM_027671, intron 2 of 20)	L1Md_A|LINE|L1	124027	NM_001290390	71096	Mm.336395	NM_027671	ENSMUSG00000025909	Sntg1	4933426D16Rik|G1SYN|SYN4	syntrophin, gamma 1	protein-coding
Peaks_1849	chrX	139684639	139685684	+	0	NA	5' UTR (NM_001081499, exon 1 of 21)	5' UTR (NM_001081499, exon 1 of 21)	165	NM_001081499	245638	Mm.275869	NM_001081499	ENSMUSG00000042473	Tbc1d8b	4921505D17Rik|9030605E16Rik	TBC1 domain family, member 8B	protein-coding
Peaks_1174	chr10	86334547	86334935	+	0	NA	intron (NM_011595, intron 1 of 4)	intron (NM_011595, intron 1 of 4)	34329	NM_011595	21859	Mm.4871	NM_011595	ENSMUSG00000020044	Timp3	Timp-3	tissue inhibitor of metalloproteinase 3	protein-coding
Peaks_260	chr1	7285495	7285703	+	0	NA	Intergenic	L1Md_T|LINE|L1	196679	NM_183028	319263	Mm.21539	NM_183028	ENSMUSG00000051285	Pcmtd1	8430411F12Rik|A030012M09Rik	protein-L-isoaspartate (D-aspartate) O-methyltransferase domain containing 1	protein-coding
Peaks_1569	chr1	79098444	79098963	+	0	NA	Intergenic	L1Md_A|LINE|L1	281754	NM_021342	57814	Mm.24386	NM_021342	ENSMUSG00000047330	Kcne4	AW487937|MiRP3	potassium voltage-gated channel, Isk-related subfamily, gene 4	protein-coding
Peaks_1434	chr9	72969883	72970150	+	0	NA	intron (NM_026314, intron 7 of 8)	intron (NM_026314, intron 7 of 8)	11231	NM_001163725	67685	Mm.31817	NM_026314	ENSMUSG00000089865	Dyx1c1	1700010I24Rik|Dnaaf4|EKN1|b2b811.1Clo|b2b811Clo	dyslexia susceptibility 1 candidate 1	protein-coding
Peaks_860	chr8	67123300	67123410	+	0	NA	Intergenic	L1Md_T|LINE|L1	263138	NM_001163564	234344	Mm.334561	NM_001163564	ENSMUSG00000014907	Naf1	Gm174	nuclear assembly factor 1 ribonucleoprotein	protein-coding
Peaks_706	chr7	130176936	130177311	+	0	NA	intron (NM_001347638, intron 11 of 15)	intron (NM_001347638, intron 11 of 15)	89685	NM_010207	14183	Mm.16340	NM_010207	ENSMUSG00000030849	Fgfr2	AU043015|AW556123|Bek|Fgfr-2|Fgfr-7|Fgfr7|KGFR|KGFRTr|svs	fibroblast growth factor receptor 2	protein-coding
Peaks_339	chr1	7610261	7610762	+	0	NA	Intergenic	IAPEz-int|LTR|ERVK	521591	NM_183028	319263	Mm.21539	NM_183028	ENSMUSG00000051285	Pcmtd1	8430411F12Rik|A030012M09Rik	protein-L-isoaspartate (D-aspartate) O-methyltransferase domain containing 1	protein-coding
Peaks_1067	chr17	13309579	13309781	+	0	NA	Intergenic	Intergenic	-44892	NM_001167578	100041352	Mm.490251	NM_001167578	ENSMUSG00000052469	Tcp10c	D17Leh66C|D17Leh66ca|Gm9880|T66C-a|Tcp-10c	t-complex protein 10c	protein-coding
Peaks_179	chr1	112933391	112933557	+	0	NA	Intergenic	IAPEz-int|LTR|ERVK	-1068556	NM_001081316	319901	Mm.103468	NM_001081316	ENSMUSG00000038702	Dsel	9330132E09Rik|DS-epi2	dermatan sulfate epimerase-like	protein-coding
Peaks_1667	chr8	91104126	91104367	+	0	NA	intron (NM_011250, intron 14 of 21)	intron (NM_011250, intron 14 of 21)	29781	NM_001302337	14339	Mm.324588	NM_010241	ENSMUSG00000031667	Aktip	AL023020|Fif|Ft|Ft1|Fts	thymoma viral proto-oncogene 1 interacting protein	protein-coding
Peaks_1049	chr1	188609899	188610162	+	0	NA	intron (NM_021408, intron 31 of 70)	MERVL-int|LTR|ERVL	347192	NM_021408	22283	Mm.331238	NM_021408	ENSMUSG00000026609	Ush2a	A930011D15Rik|A930037M10Rik|Gm676|Gm983|Mush2a|Usherin|Ushrn	Usher syndrome 2A	protein-coding
Peaks_1069	chr10	29143971	29144226	+	0	NA	5' UTR (NM_026138, exon 1 of 7)	5' UTR (NM_026138, exon 1 of 7)	102	NM_026138	67412	Mm.390264	NM_026138	ENSMUSG00000038916	Soga3	6330407J23Rik	SOGA family member 3	protein-coding
Peaks_408	chr7	48137221	48138635	+	0	NA	Intergenic	RLTR1B-int|LTR|ERV1	31057	NM_207538	404239	Mm.377927	NM_207538	ENSMUSG00000070551	Mrgprb5	Mgrg11|MrgB5	MAS-related GPR, member B5	protein-coding
Peaks_88	chr1	56999111	56999253	+	0	NA	Intergenic	MT2_Mm|LTR|ERVL	27713	NR_024325	329160	Mm.419039	NR_024325	ENSMUSG00000087022	9130024F11Rik	B530002L08|EG329160	RIKEN cDNA 9130024F11 gene	ncRNA
Peaks_82	chr4	65243202	65243624	+	0	NA	intron (NM_021362, intron 9 of 21)	intron (NM_021362, intron 9 of 21)	119239	NM_021362	18491	Mm.317854	NM_021362	ENSMUSG00000028370	Pappa	8430414N03Rik|IGFBP-4ase|PAG1|PAPP-A	pregnancy-associated plasma protein A	protein-coding
Peaks_1464	chr7	76392667	76392979	+	0	NA	intron (NM_001199224, intron 6 of 22)	intron (NM_001199224, intron 6 of 22)	162936	NM_001199224	244071	Mm.322829	NM_172902	ENSMUSG00000025754	Agbl1	Ccp4|D430020F16|EG244071|Nna1-l1	ATP/GTP binding protein-like 1	protein-coding
Peaks_1041	chrX	169036344	169037146	+	0	NA	non-coding (NR_109847, exon 1 of 15)	non-coding (NR_109847, exon 1 of 15)	134	NR_109847	11856	Mm.441810	NM_009707	ENSMUSG00000031355	Arhgap6	AI504284|RhoGAPX-1	Rho GTPase activating protein 6	protein-coding
Peaks_138	chr5	139981944	139982658	+	0	NA	Intergenic	Intergenic	74358	NM_175522	243312	Mm.237102	NM_175522	ENSMUSG00000048988	Elfn1	A930017N06Rik|AI197272|Ppp1r28	leucine rich repeat and fibronectin type III, extracellular 1	protein-coding
Peaks_905	chr1	7333624	7335737	+	0	NA	Intergenic	L1Md_T|LINE|L1	245760	NM_183028	319263	Mm.21539	NM_183028	ENSMUSG00000051285	Pcmtd1	8430411F12Rik|A030012M09Rik	protein-L-isoaspartate (D-aspartate) O-methyltransferase domain containing 1	protein-coding
Peaks_1004	chr1	85141793	85142533	+	0	NA	Intergenic	RLTR6-int|LTR|ERV1	-32310	NM_213615	381287	Mm.487565	NM_213615	ENSMUSG00000089844	A530032D15Rik	Gm1888	RIKEN cDNA A530032D15Rik gene	protein-coding
Peaks_168	chr1	182257188	182257370	+	0	NA	Intergenic	RLTR4_Mm|LTR|ERV1	25480	NM_007853	13244	Mm.29648	NM_007853	ENSMUSG00000038633	Degs1	AA536663|Degs|Des1|Mdes	delta(4)-desaturase, sphingolipid 1	protein-coding
Peaks_652	chr1	19626537	19626729	+	0	NA	Intergenic	IAPEz-int|LTR|ERVK	414579	NM_001025305	21419	Mm.137021	NM_009334	ENSMUSG00000025927	Tfap2b	AI606113|AP-2(beta)|E130018K07Rik|Tcfap2b	transcription factor AP-2 beta	protein-coding
Peaks_933	chr1	105613816	105613992	+	0	NA	intron (NM_013784, intron 14 of 30)	MERVL-int|LTR|ERVL	49772	NM_013784	27392	Mm.268911	NM_013784	ENSMUSG00000056536	Pign	Gm20308|PIG-N	phosphatidylinositol glycan anchor biosynthesis, class N	protein-coding
Peaks_159	chr1	5432704	5433131	+	0	NA	Intergenic	L1Md_A|LINE|L1	-155576	NM_011011	18387	Mm.7977	NM_011011	ENSMUSG00000025905	Oprk1	K-OR-1|KOR|KOR-1|MSL-1|Oprk2|R21	opioid receptor, kappa 1	protein-coding
Peaks_1401	chr10	122870194	122870542	+	0	NA	intron (NM_176919, intron 5 of 8)	Kanga1b|DNA|TcMar-Tc2	115356	NR_029527	387251		NR_029527	ENSMUSG00000065406	Mirlet7i	Mirnlet7i|let-7i|mmu-let-7i	microRNA let7i	ncRNA
Peaks_221	chr1	151182767	151183268	+	0	NA	Intergenic	Intergenic	44983	NR_038011	402734	Mm.337666	NR_038011		C730036E19Rik	lncLSTR	RIKEN cDNA C730036E19 gene	ncRNA
Peaks_1376	chr8	12915421	12915863	+	0	NA	promoter-TSS (NM_178076)	promoter-TSS (NM_178076)	-251	NM_178076	17207	Mm.334413	NM_178076	ENSMUSG00000031442	Mcf2l	C130040G20Rik|Dbs|Ost|mKIAA0362	mcf.2 transforming sequence-like	protein-coding
Peaks_630	chr3	114507801	114508236	+	0	NA	Intergenic	Intergenic	-355235	NR_030469	735255		NR_030469	ENSMUSG00000076126	Mir669b	Mirn669b	microRNA 669b	ncRNA
Peaks_1477	chr1	8190071	8190498	+	0	NA	Intergenic	RLTR10C|LTR|ERVK	1101364	NM_183028	319263	Mm.21539	NM_183028	ENSMUSG00000051285	Pcmtd1	8430411F12Rik|A030012M09Rik	protein-L-isoaspartate (D-aspartate) O-methyltransferase domain containing 1	protein-coding
Peaks_521	chr1	6149982	6150576	+	0	NA	Intergenic	L1Md_T|LINE|L1	-64383	NM_009826	12421	Mm.293811	NM_009826	ENSMUSG00000025907	Rb1cc1	2900055E04Rik|5930404L04Rik|Cc1|FIP200|LaXp180	RB1-inducible coiled-coil 1	protein-coding
Peaks_534	chr7	59461090	59461426	+	0	NA	Intergenic	Intergenic	-137109	NR_015479	330544	Mm.9002	NR_015479	ENSMUSG00000100826	C230091D08Rik	-	RIKEN cDNA C230091D08 gene	ncRNA
Peaks_813	chr2	108743498	108743865	+	0	NA	Intergenic	MamTip2|DNA|hAT-Tip100	534609	NM_029790	76894	Mm.330451	NM_029790	ENSMUSG00000057234	Mettl15	0610027B03Rik|AI303697|AW049952|Mett5d1	methyltransferase like 15	protein-coding
Peaks_618	chr3	129754765	129755209	+	0	NA	non-coding (NR_040589, exon 2 of 5)	non-coding (NR_040589, exon 2 of 5)	335	NM_010113	13645	Mm.252481	NM_010113	ENSMUSG00000028017	Egf	AI790464	epidermal growth factor	protein-coding
Peaks_110	chr1	4562787	4562886	+	0	NA	Intergenic	L1Md_T|LINE|L1	-65482	NM_001289465	20671	Mm.279103	NM_011441	ENSMUSG00000025902	Sox17	-	SRY (sex determining region Y)-box 17	protein-coding
Peaks_785	chr2	38565481	38566241	+	0	NA	intron (NM_001159631, intron 5 of 9)	MTA_Mm-int|LTR|ERVL-MaLR	53985	NM_001159631	59126	Mm.143818	NM_021606	ENSMUSG00000026749	Nek6	1300007C09Rik	NIMA (never in mitosis gene a)-related expressed kinase 6	protein-coding
Peaks_180	chr1	115885866	115885996	+	0	NA	intron (NM_001077425, intron 1 of 23)	IAPEz-int|LTR|ERVK	200794	NM_001077425	636808	Mm.101576	NM_001077425	ENSMUSG00000070695	Cntnap5a	Caspr5-1|EG636808	contactin associated protein-like 5A	protein-coding
Peaks_201	chr1	12666092	12666174	+	0	NA	Intergenic	L1Md_T|LINE|L1	-1430	NR_045297	329096	Mm.417782	NR_045297	ENSMUSG00000097171	Gm17644	4932411L15	predicted gene, 17644	ncRNA
Peaks_914	chr1	127592630	127592931	+	0	NA	intron (NM_028135, intron 2 of 7)	RLTR10-int|LTR|ERVK	85241	NM_028135	72160	Mm.281287	NM_028135	ENSMUSG00000026347	Tmem163	2610024A01Rik|SV31	transmembrane protein 163	protein-coding
Peaks_769	chr1	170255222	170255859	+	0	NA	Intergenic	CpG	-21784	NM_012009	26904	Mm.57009	NM_012009	ENSMUSG00000102418	Sh2d1b1	EAT-2|EAT-2A|Eat2|Eat2a|Sh2d1b	SH2 domain containing 1B1	protein-coding
Peaks_650	chr1	133594436	133595116	+	0	NA	Intergenic	Intergenic	15504	NM_009227	20643	Mm.249110	NM_009227	ENSMUSG00000090553	Snrpe	AL022645|C76690|SME	small nuclear ribonucleoprotein E	protein-coding
Peaks_1802	chr1	7999592	7999830	+	0	NA	Intergenic	IAPEz-int|LTR|ERVK	910791	NM_183028	319263	Mm.21539	NM_183028	ENSMUSG00000051285	Pcmtd1	8430411F12Rik|A030012M09Rik	protein-L-isoaspartate (D-aspartate) O-methyltransferase domain containing 1	protein-coding
Peaks_1641	chr1	20393415	20394233	+	0	NA	intron (NM_153179, intron 37 of 66)	MTA_Mm-int|LTR|ERVL-MaLR	37370	NR_045734	75028	Mm.417820	NR_045734	ENSMUSG00000089914	4930486I03Rik	-	RIKEN cDNA 4930486I03 gene	ncRNA
Peaks_486	chr5	20068693	20068810	+	0	NA	intron (NM_001170746, intron 3 of 22)	intron (NM_001170746, intron 3 of 22)	161233	NM_015823	50791	Mm.332231	NM_015823	ENSMUSG00000040003	Magi2	AIP-1|Acvri1|Acvrinp1|Acvrip1|Magi-2|S-SCAM|mKIAA0705	membrane associated guanylate kinase, WW and PDZ domain containing 2	protein-coding
Peaks_1813	chr7	64073387	64074380	+	0	NA	Intergenic	Intergenic	-79952	NM_001039104	17364	Mm.38875	NM_018752	ENSMUSG00000030523	Trpm1	4732499L03Rik|AI606771|Ltrpc1|Mlsn1	transient receptor potential cation channel, subfamily M, member 1	protein-coding
Peaks_406	chr1	30265746	30266011	+	0	NA	Intergenic	MTA_Mm|LTR|ERVL-MaLR	597378	NM_001081080	213109	Mm.194486	NM_025871	ENSMUSG00000048874	Phf3	2310061N19Rik|mKIAA0244	PHD finger protein 3	protein-coding
Peaks_1607	chr11	6384893	6385049	+	0	NA	Intergenic	MERVL-int|LTR|ERVL	-10154	NM_001005867	52915	Mm.1144	NM_028601	ENSMUSG00000041164	Zmiz2	Zimp7	zinc finger, MIZ-type containing 2	protein-coding
Peaks_1243	chr1	44367176	44368115	+	0	NA	Intergenic	MMERVK10C-int|LTR|ERVK	-148714	NM_207281	403183	Mm.336176	NM_207281	ENSMUSG00000046828	Mettl21e	4832428D23Rik|Gm991	methyltransferase like 21E	protein-coding
Peaks_496	chr2	128313988	128314302	+	0	NA	intron (NR_028589, intron 2 of 2)	intron (NR_028589, intron 2 of 2)	115206	NR_028591	100043424	Mm.297222	NR_028589		Gm14005	OTTMUSG00000015351	predicted gene 14005	ncRNA
Peaks_368	chr1	27182669	27183239	+	0	NA	Intergenic	IAPEz-int|LTR|ERVK	-495494	NM_001033764	210940	Mm.297614	NM_001033764	ENSMUSG00000073722	4931408C20Rik	-	RIKEN cDNA 4931408C20 gene	protein-coding
Peaks_225	chr5	62765655	62766737	+	0	NA	promoter-TSS (NM_178407)	promoter-TSS (NM_178407)	-19	NM_178407	212285	Mm.244403	NM_178407	ENSMUSG00000037999	Arap2	Centd1|Gm148|mKIAA0580	ArfGAP with RhoGAP domain, ankyrin repeat and PH domain 2	protein-coding
Peaks_583	chr1	35081219	35081739	+	0	NA	Intergenic	L1Md_F2|LINE|L1	231520	NM_145516	226971	Mm.292751	NM_145516	ENSMUSG00000026123	Plekhb2	2310009M15Rik|AU018239|Evt2|Phdc|evt-2	pleckstrin homology domain containing, family B (evectins) member 2	protein-coding
Peaks_346	chr5	9421081	9421486	+	0	NA	intron (NM_172706, intron 6 of 21)	intron (NM_172706, intron 6 of 21)	45579	NR_030537	100124492		NR_030537	ENSMUSG00000077896	Mir879	Mirn879|mir-879|mmu-mir-879	microRNA 879	ncRNA
Peaks_1250	chr7	33956364	33956445	+	0	NA	Intergenic	RMER19B|LTR|ERVK	-11419	NM_178308	110187	Mm.155750	NM_178308	ENSMUSG00000066586	Scgb2b26	Abpbg26|Abpbg4|Abpg|C2d|Scgb2b4	secretoglobin, family 2B, member 26	protein-coding
Peaks_948	chr17	6476500	6477386	+	0	NA	Intergenic	CpG	-25949	NR_033520	547127	Mm.297552	NM_001045538		Tmem181b-ps	Tmem181b	transmembrane protein 181B, pseudogene	pseudo
Peaks_1155	chr1	5353183	5353307	+	0	NA	Intergenic	L1Md_T|LINE|L1	-235248	NM_011011	18387	Mm.7977	NM_011011	ENSMUSG00000025905	Oprk1	K-OR-1|KOR|KOR-1|MSL-1|Oprk2|R21	opioid receptor, kappa 1	protein-coding
Peaks_919	chr5	14910677	14911280	+	0	NA	intron (NM_198666, intron 4 of 4)	intron (NM_198666, intron 4 of 4)	3911	NM_198666	381714	Mm.368256	NM_198666	ENSMUSG00000033219	Gm9758	ENSMUSG00000033219	predicted gene 9758	protein-coding
Peaks_743	chr4	114650974	114651424	+	0	NA	Intergenic	Intergenic	-170521	NR_033617	433746	Mm.388908	NR_033617	ENSMUSG00000055198	Gm12830	OTTMUSG00000008584	predicted gene 12830	ncRNA
Peaks_126	chr2	75747880	75748190	+	0	NA	Intergenic	Intergenic	-43372	NM_010902	18024	Mm.1025	NM_010902	ENSMUSG00000015839	Nfe2l2	Nrf2	nuclear factor, erythroid derived 2, like 2	protein-coding
Peaks_736	chr7	131597690	131597895	+	0	NA	Intergenic	Intergenic	37298	NM_001317350	12237	Mm.927	NM_009774	ENSMUSG00000066979	Bub3	AU019800|AU021329|AU043350|AW146323|C78067	BUB3 mitotic checkpoint protein	protein-coding
Peaks_1504	chr18	66041191	66041357	+	0	NA	Intergenic	Intergenic	-38639	NM_001172062	70361	Mm.290857	NM_027400	ENSMUSG00000041891	Lman1	2610020P13Rik|AI326273|AU043785|C730041J05|ERGIC53|F5F8D|MCFD1|MR60|P58|gp58	lectin, mannose-binding, 1	protein-coding
Peaks_295	chr1	37774054	37774160	+	0	NA	intron (NM_001290720, intron 15 of 17)	IAPLTR1a_Mm|LTR|ERVK	-54296	NM_028096	72097	Mm.142607	NM_028096	ENSMUSG00000026090	2010300C02Rik	-	RIKEN cDNA 2010300C02 gene	protein-coding
Peaks_1768	chr1	30763796	30763884	+	0	NA	Intergenic	L1Md_T|LINE|L1	99416	NM_001081080	213109	Mm.194486	NM_025871	ENSMUSG00000048874	Phf3	2310061N19Rik|mKIAA0244	PHD finger protein 3	protein-coding
Peaks_695	chr1	161932827	161933407	+	0	NA	Intergenic	L1Md_T|LINE|L1	36031	NM_001204905	75368	Mm.108728	NM_001204904	ENSMUSG00000086277	4930558K02Rik	-	RIKEN cDNA 4930558K02 gene	protein-coding
Peaks_439	chrX	11299377	11299673	+	0	NA	exon (NM_001242949, exon 1 of 1).3	exon (NM_001242949, exon 1 of 1).3	204	NM_001242950	100042931	Mm.374311	NM_001242950	ENSMUSG00000094904	H2al1d	ENSMUSG00000073284|Gm14476|OTTMUSG00000016781	H2A histone family member L1D	protein-coding
Peaks_185	chr1	182261426	182261937	+	0	NA	Intergenic	RLTR4_MM-int|LTR|ERV1	21078	NM_007853	13244	Mm.29648	NM_007853	ENSMUSG00000038633	Degs1	AA536663|Degs|Des1|Mdes	delta(4)-desaturase, sphingolipid 1	protein-coding
Peaks_877	chr12	112542872	112543218	+	0	NA	Intergenic	Intergenic	-31885	NM_178915	104885	Mm.37751	NM_178915	ENSMUSG00000054013	Tmem179	AI839735	transmembrane protein 179	protein-coding
Peaks_276	chr2	115923231	115923687	+	0	NA	intron (NM_001346047, intron 9 of 13)	intron (NM_001346047, intron 9 of 13)	141160	NM_001346044	17536	Mm.247566	NM_010825	ENSMUSG00000027210	Meis2	A430109D20Rik|Mrg1|Stra10	Meis homeobox 2	protein-coding
Peaks_1601	chr1	139954339	139954927	+	0	NA	Intergenic	MERVL-int|LTR|ERVL	-95934	NM_001025575	545366	Mm.439660	NM_001025575	ENSMUSG00000033898	Cfhr2	Cfhrb_4/2	complement factor H-related 2	protein-coding
Peaks_1234	chr11	12464333	12465246	+	0	NA	5' UTR (NM_001282993, exon 1 of 14)	5' UTR (NM_001282993, exon 1 of 14)	171	NM_172496	12808	Mm.22847	NM_172496	ENSMUSG00000020173	Cobl	-	cordon-bleu WH2 repeat	protein-coding
Peaks_334	chr1	43118975	43119296	+	0	NA	Intergenic	RLTR10C|LTR|ERVK	20425	NM_133818	98404	Mm.28817	NM_133818	ENSMUSG00000010290	AI597479	-	expressed sequence AI597479	protein-coding
Peaks_1367	chr2	122819559	122819790	+	0	NA	Intergenic	Intergenic	37675	NM_021507	59010	Mm.28986	NM_021507	ENSMUSG00000005803	Sqrdl	0610039J17Rik|4930557M22Rik|SQOR	sulfide quinone reductase-like (yeast)	protein-coding
Peaks_962	chr1	164138679	164139054	+	0	NA	intron (NM_011347, intron 9 of 15)	intron (NM_011347, intron 9 of 15)	-12969	NM_007976	14067	Mm.12900	NM_007976	ENSMUSG00000026579	F5	AI173222|Cf-5|Cf5	coagulation factor V	protein-coding
Peaks_275	chr1	6431367	6432166	+	0	NA	Intergenic	IAPEz-int|LTR|ERVK	-55465	NM_001244693	240690	Mm.234612	NM_173868	ENSMUSG00000033740	St18	AV348974|Myt3|NZF-3|Nzf3|mKIAA0535	suppression of tumorigenicity 18	protein-coding
Peaks_1596	chr12	72664245	72664328	+	0	NA	intron (NM_025522, intron 1 of 6)	intron (NM_025522, intron 1 of 6)	542	NM_025522	66375	Mm.289653	NM_025522	ENSMUSG00000021094	Dhrs7	2310016E22Rik|5730564L20Rik|AW061210|Retdsr4|Retsdr4	dehydrogenase/reductase (SDR family) member 7	protein-coding
Peaks_500	chr12	119376924	119377320	+	0	NA	Intergenic	Intergenic	-66288	NM_001163136	238455	Mm.31376	NM_001163136	ENSMUSG00000041886	Macc1	4732474O15Rik|Gm267	metastasis associated in colon cancer 1	protein-coding
Peaks_38	chr1	12666702	12667018	+	0	NA	promoter-TSS (NR_045297)	promoter-TSS (NR_045297)	-703	NR_045297	329096	Mm.417782	NR_045297	ENSMUSG00000097171	Gm17644	4932411L15	predicted gene, 17644	ncRNA
Peaks_87	chr4	80002641	80003055	+	0	NA	Intergenic	Intergenic	-831365	NM_031202	22178	Mm.30438	NM_031202	ENSMUSG00000005994	Tyrp1	Oca3|TRP-1|TRP1|Tyrp|b|brown|isa	tyrosinase-related protein 1	protein-coding
Peaks_364	chr1	19974011	19974265	+	0	NA	Intergenic	Intergenic	-382316	NR_045734	75028	Mm.417820	NR_045734	ENSMUSG00000089914	4930486I03Rik	-	RIKEN cDNA 4930486I03 gene	ncRNA
Peaks_75	chr3	81835486	81836117	+	0	NA	Intergenic	RLTR26_Mus|LTR|ERVK	33776	NR_138586	320566	Mm.208417	NR_138586	ENSMUSG00000103695	A830029E22Rik	-	RIKEN cDNA A830029E22 gene	ncRNA
Peaks_90	chr4	78642923	78643160	+	0	NA	Intergenic	Intergenic	48994	NR_131142	623726		NR_131142		A430085M09Rik	EG623726	RIKEN cDNA A430085M09 gene	ncRNA
Peaks_1277	chr1	6172045	6172571	+	0	NA	Intergenic	IAPEz-int|LTR|ERVK	-42354	NM_009826	12421	Mm.293811	NM_009826	ENSMUSG00000025907	Rb1cc1	2900055E04Rik|5930404L04Rik|Cc1|FIP200|LaXp180	RB1-inducible coiled-coil 1	protein-coding
Peaks_1853	chr1	17466824	17467564	+	0	NA	Intergenic	L1Md_T|LINE|L1	-134707	NM_053191	94227	Mm.442452	NM_053191	ENSMUSG00000067780	Pi15	P24TI|P25TI|PI-15|SugarCrisp	peptidase inhibitor 15	protein-coding
Peaks_886	chr1	180242240	180242721	+	0	NA	intron (NM_001128605, intron 2 of 10)	intron (NM_001128605, intron 2 of 10)	3470	NM_011183	19165	Mm.330850	NM_011183	ENSMUSG00000010609	Psen2	ALG-3|Ad4h|Alg3|PS-2|PS2|Psnl2|STM2	presenilin 2	protein-coding
Peaks_306	chr16	35660036	35660659	+	0	NA	exon (NM_013661, exon 16 of 22)	exon (NM_013661, exon 16 of 22)	109009	NM_153550	224132	Mm.24094	NM_153550	ENSMUSG00000022848	Dirc2	RCC4	disrupted in renal carcinoma 2 (human)	protein-coding
Peaks_903	chr1	3136828	3137388	+	0	NA	Intergenic	L1Md_A|LINE|L1	534390	NM_001011874	497097	Mm.454496	NM_001011874	ENSMUSG00000051951	Xkr4	AY534250|Gm210|XRG4|mKIAA1889	X-linked Kx blood group related 4	protein-coding
Peaks_1793	chr1	84984337	84984684	+	0	NA	Intergenic	Intergenic	-49427	NM_027921	71781	Mm.158754	NM_027921	ENSMUSG00000026220	Slc16a14	1110004H10Rik	solute carrier family 16 (monocarboxylic acid transporters), member 14	protein-coding
Peaks_350	chr15	50607192	50607560	+	0	NA	Intergenic	Intergenic	281673	NM_001310481	83925	Mm.30466	NM_032000	ENSMUSG00000038679	Trps1	AI115454|AI447310|D15Ertd586e	trichorhinophalangeal syndrome I (human)	protein-coding
Peaks_1266	chr5	14940479	14941168	+	0	NA	Intergenic	Intergenic	-2348	NM_001122661	624245	Mm.368256	NM_001122661	ENSMUSG00000091255	Speer4e	-	spermatogenesis associated glutamate (E)-rich protein 4e	protein-coding
Peaks_356	chr5	105850623	105850995	+	0	NA	Intergenic	Intergenic	-25759	NR_030777	54367	Mm.248876	NM_018759	ENSMUSG00000029290	Zfp326	5730470H14Rik|ZAN75|Znf326	zinc finger protein 326	protein-coding
Peaks_774	chr6	129237654	129238520	+	0	NA	promoter-TSS (NR_040265)	promoter-TSS (NR_040265)	-42	NR_040265	76432	Mm.261738	NR_040265	ENSMUSG00000097354	2310001H17Rik	AI646108	RIKEN cDNA 2310001H17 gene	ncRNA
Peaks_656	chr8	55114736	55115218	+	0	NA	Intergenic	RLTR17B_Mm|LTR|ERVK	160249	NM_001253756	234267	Mm.241700	NM_153581	ENSMUSG00000031517	Gpm6a	Gpm6|M6A	glycoprotein m6a	protein-coding
Peaks_6	chr7	14771211	14771688	+	0	NA	Intergenic	MTC-int|LTR|ERVL-MaLR	111741	NM_001038676	194588	Mm.389816	NM_001038676	ENSMUSG00000055942	Obox7	EG194588|Gm4745	oocyte specific homeobox 7	protein-coding
Peaks_1354	chr6	82132849	82133352	+	0	NA	Intergenic	MTD|LTR|ERVL-MaLR	91472	NM_145570	232146	Mm.489683	NM_145570	ENSMUSG00000035104	Eva1a	BC014699|Fam176a|Tmem166	eva-1 homolog A (C. elegans)	protein-coding
Peaks_639	chr13	4608944	4609487	+	0	NA	promoter-TSS (NM_018859)	promoter-TSS (NM_018859)	-51	NM_018859	56043	Mm.251908	NM_018859	ENSMUSG00000045410	Akr1e1	1810061I10Rik|Akr1e2	aldo-keto reductase family 1, member E1	protein-coding
Peaks_1148	chr1	64385235	64385604	+	0	NA	Intergenic	IAPEz-int|LTR|ERVK	-147385	NM_133828	12912	Mm.422634	NM_009952	ENSMUSG00000025958	Creb1	2310001E10Rik|3526402H21Rik|AV083133|Creb|Creb-1	cAMP responsive element binding protein 1	protein-coding
Peaks_480	chr2	137165833	137166287	+	0	NA	Intergenic	Intergenic	-49540	NM_013822	16449	Mm.22398	NM_013822	ENSMUSG00000027276	Jag1	ABE2|Gsfabe2|Htu|Ozz|Ser-1	jagged 1	protein-coding
Peaks_1050	chr13	112430494	112430880	+	0	NA	Intergenic	Intergenic	-33383	NM_010560	16195	Mm.4364	NM_010560	ENSMUSG00000021756	Il6st	5133400A03Rik|AA389424|BB405851|CD130|D13Ertd699e|gp130	interleukin 6 signal transducer	protein-coding
Peaks_404	chr2	83865724	83866083	+	0	NA	intron (NM_175514, intron 5 of 7)	MT2_Mm|LTR|ERVL	53175	NM_175514	241520	Mm.330351	NM_175514	ENSMUSG00000048388	Fam171b	D430039N05Rik	family with sequence similarity 171, member B	protein-coding
Peaks_1022	chr1	26470607	26470702	+	0	NA	Intergenic	IAPLTR1a_Mm|LTR|ERVK	216806	NM_001033764	210940	Mm.297614	NM_001033764	ENSMUSG00000073722	4931408C20Rik	-	RIKEN cDNA 4931408C20 gene	protein-coding
Peaks_1104	chrX	75758980	75759238	+	0	NA	intron (NR_029443, intron 2 of 8)	intron (NR_029443, intron 2 of 8)	5590	NR_029443	74396	Mm.162493	NR_029443	ENSMUSG00000087396	4933407K13Rik	A130080L05Rik	RIKEN cDNA 4933407K13 gene	ncRNA
Peaks_64	chr1	10894293	10895671	+	0	NA	Intergenic	MERVL-int|LTR|ERVL	-29108	NR_030645	100124448		NR_030645	ENSMUSG00000076948	Mir467e	Mirn467e	microRNA 467e	ncRNA
Peaks_1837	chr1	13556951	13557356	+	0	NA	Intergenic	IAPEz-int|LTR|ERVK	32757	NM_028173	72265	Mm.28765	NM_028173	ENSMUSG00000025935	Tram1	1810049E02Rik|TRAMP	translocating chain-associating membrane protein 1	protein-coding
Peaks_1669	chr3	154653077	154653372	+	0	NA	Intergenic	Intergenic	-56126	NM_172474	209584	Mm.347513	NM_172474	ENSMUSG00000047583	Tyw3	5230400J09Rik	tRNA-yW synthesizing protein 3 homolog (S. cerevisiae)	protein-coding
Peaks_934	chr1	6919087	6919719	+	0	NA	Intergenic	L1Md_A|LINE|L1	-169517	NM_183028	319263	Mm.21539	NM_183028	ENSMUSG00000051285	Pcmtd1	8430411F12Rik|A030012M09Rik	protein-L-isoaspartate (D-aspartate) O-methyltransferase domain containing 1	protein-coding
Peaks_1847	chr4	106859534	106859912	+	0	NA	Intergenic	Intergenic	-51747	NM_198438	72475	Mm.195635	NM_023672	ENSMUSG00000061887	Ssbp3	2610021L12Rik|2610200M23Rik|5730488C10Rik|AI854733|AW551939|LAST|SSDP1	single-stranded DNA binding protein 3	protein-coding
Peaks_1682	chr3	151000295	151000573	+	0	NA	Intergenic	Intergenic	-437448	NM_133222	170757	Mm.317261	NM_133222	ENSMUSG00000039167	Adgrl4	1110033N21Rik|ETL1|Eltd1|Etl	adhesion G protein-coupled receptor L4	protein-coding
Peaks_817	chr2	107290107	107290833	+	0	NA	promoter-TSS (NM_021275)	promoter-TSS (NM_021275)	-119	NM_021275	16492	Mm.142718	NM_021275	ENSMUSG00000042604	Kcna4	Kv1.4	potassium voltage-gated channel, shaker-related subfamily, member 4	protein-coding
Peaks_382	chr1	6433219	6434674	+	0	NA	Intergenic	IAPEz-int|LTR|ERVK	-53285	NM_001244693	240690	Mm.234612	NM_173868	ENSMUSG00000033740	St18	AV348974|Myt3|NZF-3|Nzf3|mKIAA0535	suppression of tumorigenicity 18	protein-coding
Peaks_1289	chr1	75713756	75714872	+	0	NA	Intergenic	L1Md_T|LINE|L1	168048	NM_009208	20536	Mm.5053	NM_009208	ENSMUSG00000006576	Slc4a3	A930038D23Rik|Ae3	solute carrier family 4 (anion exchanger), member 3	protein-coding
Peaks_100	chr1	158331810	158331978	+	0	NA	intron (NM_207583, intron 1 of 7)	L1Md_T|LINE|L1	24366	NM_207583	240843	Mm.329579	NM_207583	ENSMUSG00000004031	Brinp2	6430517E21Rik|BB361039|Fam5b|mKIAA1747	bone morphogenic protein/retinoic acid inducible neural-specific 2	protein-coding
Peaks_1446	chr19	56308740	56309043	+	0	NA	exon (NM_001329936, exon 4 of 7)	exon (NM_001329936, exon 4 of 7)	20979	NM_146101	226243	Mm.25791	NM_146101	ENSMUSG00000025075	Habp2	AI035669|FSAP|HABP|HGFAL|PHBP	hyaluronic acid binding protein 2	protein-coding
Peaks_991	chr1	84121727	84122074	+	0	NA	intron (NM_001003948, intron 2 of 2)	L1Md_A|LINE|L1	97061	NR_105771	102465181		NR_105771	ENSMUSG00000098851	Mir6353	Gm27391|mmu-mir-6353	microRNA 6353	ncRNA
Peaks_475	chr9	89622525	89623596	+	0	NA	promoter-TSS (NM_153509)	promoter-TSS (NM_153509)	-74	NM_153509	209743	Mm.242899	NM_153509	ENSMUSG00000039313	AF529169	DD1|Kiaa1024	cDNA sequence AF529169	protein-coding
Peaks_59	chr1	5254370	5255143	+	0	NA	Intergenic	MERVL-int|LTR|ERVL	171670	NM_001310442	108664	Mm.27082	NM_133826	ENSMUSG00000033793	Atp6v1h	0710001F19Rik|AU022349|CGI-11|SFD|SFDalpha|SFDbeta|VMA13	ATPase, H+ transporting, lysosomal V1 subunit H	protein-coding
Peaks_841	chr7	51510708	51511550	+	0	NA	promoter-TSS (NM_177694)	promoter-TSS (NM_177694)	100	NM_001271879	233246	Mm.254431	NM_177694	ENSMUSG00000055489	Ano5	9330162L24|Gdd1|Tmem16e	anoctamin 5	protein-coding
Peaks_1574	chr6	142386773	142387814	+	0	NA	promoter-TSS (NM_001204907)	promoter-TSS (NM_001204907)	50	NM_025872	66964	Mm.3676	NM_025872	ENSMUSG00000030245	Golt1b	2310061A22Rik|AA407874|AU024291|CGI-141	golgi transport 1B	protein-coding
Peaks_1204	chr1	98602407	98602838	+	0	NA	Intergenic	IAPEz-int|LTR|ERVK	181498	NM_027584	70866	Mm.389164	NM_027584	ENSMUSG00000026336	Slco6d1	4921511I05Rik	solute carrier organic anion transporter family, member 6d1	protein-coding
Peaks_974	chr5	129500776	129500950	+	0	NA	promoter-TSS (NM_172276)	promoter-TSS (NM_172276)	-368	NM_172276	231769	Mm.288714	NM_172276	ENSMUSG00000029439	Sfswap	1190005N23Rik|6330437E22Rik|AI197402|AW212079|SWAP|Sfrs8|Srsf8	splicing factor, suppressor of white-apricot homolog (Drosophila)	protein-coding
Peaks_1822	chr2	148619261	148619498	+	0	NA	Intergenic	IAPEz-int|LTR|ERVK	-53236	NM_019761	56488	Mm.34663	NM_019761	ENSMUSG00000036992	Nxt1	1110001N02Rik	NTF2-related export protein 1	protein-coding
Peaks_143	chr3	16369517	16369721	+	0	NA	Intergenic	RLTR13A2|LTR|ERVK	186436	NM_001145919	229096	Mm.23834	NM_172677	ENSMUSG00000047213	Ythdf3	9130022A11Rik	YTH domain family 3	protein-coding
Peaks_1198	chr1	110329170	110329376	+	0	NA	Intergenic	IAPLTR1_Mm|LTR|ERVK	345550	NM_172853	241201	Mm.213407	NM_172853	ENSMUSG00000026312	Cdh7	9330156F07Rik|CDH7L1	cadherin 7, type 2	protein-coding
Peaks_648	chr5	14953160	14953626	+	0	NA	intron (NR_001584, intron 1 of 3)	Lx|LINE|L1	8099	NR_001584	74062	Mm.394766	NR_001584		Speer8-ps1	4933405L09Rik|SPEER-8|Speer8-ps	spermatogenesis associated glutamate (E)-rich protein 8, pseudogene 1	pseudo
Peaks_210	chr1	7993760	7993863	+	0	NA	Intergenic	IAPLTR1a_Mm|LTR|ERVK	904891	NM_183028	319263	Mm.21539	NM_183028	ENSMUSG00000051285	Pcmtd1	8430411F12Rik|A030012M09Rik	protein-L-isoaspartate (D-aspartate) O-methyltransferase domain containing 1	protein-coding
Peaks_242	chr1	40699482	40699828	+	0	NA	intron (NM_001033289, intron 1 of 11)	IAPEz-int|LTR|ERVK	17943	NM_001033289	226999	Mm.256414	NM_001033289	ENSMUSG00000026062	Slc9a2	2210416H12Rik|4932415O19Rik|AV333884|NHE2	solute carrier family 9 (sodium/hydrogen exchanger), member 2	protein-coding
Peaks_1753	chr1	71859981	71860137	+	0	NA	Intergenic	RLTR10|LTR|ERVK	-28053	NR_027658	667931	Mm.214128	NR_027658	ENSMUSG00000099707	Gm8883	EG667931|Gm554	predicted gene 8883	ncRNA
Peaks_1439	chr19	33761279	33761937	+	0	NA	5' UTR (NM_001322338, exon 1 of 11)	5' UTR (NM_001322338, exon 1 of 11)	343	NM_001322338	101055671		NM_001322338	ENSMUSG00000087303	Lipo2	EG668114|Gm8981	lipase, member O2	protein-coding
Peaks_1519	chr15	42676152	42676511	+	0	NA	exon (NM_001286062, exon 1 of 9)	exon (NM_001286062, exon 1 of 9)	646	NM_001286062	11600	Mm.309336	NM_009640	ENSMUSG00000022309	Angpt1	1110046O21Rik|Ang-1|Ang1	angiopoietin 1	protein-coding
Peaks_1466	chr1	103589639	103590571	+	0	NA	Intergenic	IAPEz-int|LTR|ERVK	-1178714	NM_011800	23836	Mm.103640	NM_011800	ENSMUSG00000050840	Cdh20	Cdh7	cadherin 20	protein-coding
Peaks_22	chr7	15157679	15157981	+	0	NA	Intergenic	L1_Mus3|LINE|L1	-231021	NM_145708	246792	Mm.26391	NM_145708	ENSMUSG00000074369	Obox2	-	oocyte specific homeobox 2	protein-coding
Peaks_954	chr11	96363925	96364230	+	0	NA	Intergenic	Intergenic	-1681	NM_008266	15407	Mm.890	NM_008266	ENSMUSG00000018973	Hoxb1	Hox-2.9	homeobox B1	protein-coding
Peaks_287	chr4	41810623	41811104	+	0	NA	Intergenic	Intergenic	-36687	NM_001347065	20301	Mm.335946	NM_011336	ENSMUSG00000073888	Ccl27a	ALP|AW558992|CTACK|CTAK|Ccl27|ESkine|ILC|PESKY|Scya27|Scya27a	chemokine (C-C motif) ligand 27A	protein-coding
Peaks_444	chr15	99552285	99552840	+	0	NA	Intergenic	Intergenic	-24397	NM_001038658	72393	Mm.39760	NM_028224	ENSMUSG00000023011	Faim2	2900002L20Rik|Lfg|Lfg2|NMP25|Nmp35|Tmbim2	Fas apoptotic inhibitory molecule 2	protein-coding
Peaks_823	chr12	59034921	59035237	+	0	NA	Intergenic	B2_Mm2|SINE|B2	21688	NM_025656	66603	Mm.35353	NM_025656	ENSMUSG00000060121	Gemin2	Sip1|gemin-2	gem (nuclear organelle) associated protein 2	protein-coding
Peaks_876	chr7	15142068	15142320	+	0	NA	Intergenic	RMER1C|Other|Other	-246657	NM_145708	246792	Mm.26391	NM_145708	ENSMUSG00000074369	Obox2	-	oocyte specific homeobox 2	protein-coding
Peaks_259	chr1	22154476	22155658	+	0	NA	Intergenic	MTA_Mm-int|LTR|ERVL-MaLR	-192417	NM_001310477	226922	Mm.336519	NM_023872	ENSMUSG00000028033	Kcnq5	7730402H11|9230107O05Rik|AA589396|D1Mgi1	potassium voltage-gated channel, subfamily Q, member 5	protein-coding
Peaks_454	chr14	67484518	67484890	+	0	NA	Intergenic	Intergenic	-86962	NR_045961	73977	Mm.414915	NR_045961	ENSMUSG00000093472	4930438E09Rik	-	RIKEN cDNA 4930438E09 gene	ncRNA
Peaks_1462	chr3	125403691	125404512	+	0	NA	promoter-TSS (NM_022565)	promoter-TSS (NM_022565)	10	NM_022565	64580	Mm.444289	NM_022565	ENSMUSG00000027971	Ndst4	4930439H17Rik	N-deacetylase/N-sulfotransferase (heparin glucosaminyl) 4	protein-coding
Peaks_1271	chr16	9163937	9164266	+	0	NA	Intergenic	Intergenic	334001	NM_001081400	69053	Mm.390868	NM_001081400	ENSMUSG00000022507	1810013L24Rik	1110017P05Rik|3010002C02Rik|AA792997|AW124177|Gm19906|R74903	RIKEN cDNA 1810013L24 gene	protein-coding
Peaks_620	chr14	118551521	118552056	+	0	NA	intron (NM_001033336, intron 20 of 30)	intron (NM_001033336, intron 20 of 30)	40684	NR_105815	102465208		NR_105815	ENSMUSG00000098433	Mir6391	Gm27914|mmu-mir-6391	microRNA 6391	ncRNA
Peaks_1388	chr1	7996334	7996721	+	0	NA	Intergenic	IAPEz-int|LTR|ERVK	907607	NM_183028	319263	Mm.21539	NM_183028	ENSMUSG00000051285	Pcmtd1	8430411F12Rik|A030012M09Rik	protein-L-isoaspartate (D-aspartate) O-methyltransferase domain containing 1	protein-coding
Peaks_115	chr1	18519234	18519543	+	0	NA	Intergenic	IAPEz-int|LTR|ERVK	-254250	NM_001040027	77673	Mm.99530	NM_183124	ENSMUSG00000067773	Defb41	9230102D03Rik|BD-17|Bd-41|Defb16|Defb17|Gm15386|OTTMUSG00000020946|OTTMUSG00000020948	defensin beta 41	protein-coding
Peaks_52	chr2	143641595	143641954	+	0	NA	intron (NM_008792, intron 2 of 11)	intron (NM_008792, intron 2 of 11)	-93937	NR_040354	378776	Mm.381216	NR_040354	ENSMUSG00000086171	Pcsk2os1	C630020P19Rik	proprotein convertase subtilisin/kexin type 2, opposite strand 1	ncRNA
Peaks_417	chr1	53132934	53133937	+	0	NA	Intergenic	IAPEz-int|LTR|ERVK	54182	NM_027070	69397	Mm.307084	NM_027070	ENSMUSG00000060715	1700019A02Rik	-	RIKEN cDNA 1700019A02 gene	protein-coding
Peaks_1459	chr3	123446729	123447839	+	0	NA	exon (NM_008939, exon 1 of 11)	exon (NM_008939, exon 1 of 11)	371	NM_008939	19142	Mm.9431	NM_008939	ENSMUSG00000027978	Prss12	Bssp-3|motopsin	protease, serine 12 neurotrypsin (motopsin)	protein-coding
Peaks_1625	chr1	110447791	110448055	+	0	NA	Intergenic	Intergenic	464200	NM_172853	241201	Mm.213407	NM_172853	ENSMUSG00000026312	Cdh7	9330156F07Rik|CDH7L1	cadherin 7, type 2	protein-coding
Peaks_315	chr5	95949825	95950219	+	0	NA	Intergenic	Intergenic	-6917	NM_018866	55985	Mm.10116	NM_018866	ENSMUSG00000023078	Cxcl13	4631412M08Rik|ANGIE2|Angie|BCA-1|BLC|BLR1L|Scyb13	chemokine (C-X-C motif) ligand 13	protein-coding
Peaks_70	chr2	78006723	78007138	+	0	NA	Intergenic	L1MEc|LINE|L1	-44247	NR_108098	78158	Mm.78473	NR_108098	ENSMUSG00000085431	4930440I19Rik	-	RIKEN cDNA 4930440I19 gene	ncRNA
Peaks_708	chr1	39796253	39796468	+	0	NA	Intergenic	RLTR10C|LTR|ERVK	8972	NM_001177348	100042065	Mm.209678	NM_001177348	ENSMUSG00000091937	Gm3646	-	predicted gene 3646	protein-coding
Peaks_14	chr4	156341999	156342342	+	0	NA	Intergenic	Intergenic	11044	NM_009485	22300	Mm.377117	NM_009485		Vmn2r123	V2r1	vomeronasal 2, receptor 123	protein-coding
Peaks_489	chr1	83988332	83988998	+	0	NA	Intergenic	MMERGLN-int|LTR|ERV1	230296	NR_105771	102465181		NR_105771	ENSMUSG00000098851	Mir6353	Gm27391|mmu-mir-6353	microRNA 6353	ncRNA
Peaks_1761	chr7	49265548	49265862	+	0	NA	intron (NM_175272, intron 1 of 37)	intron (NM_175272, intron 1 of 37)	19516	NM_175272	78286	Mm.333881	NM_175272	ENSMUSG00000052512	Nav2	5330421F07Rik|AU067780|BQ960892|HELAD1|POMFIL2|RAINB1|RAINB2|Unc53H2|mKIAA3015	neuron navigator 2	protein-coding
Peaks_1839	chr2	150451084	150451901	+	0	NA	promoter-TSS (NM_001310645)	promoter-TSS (NM_001310645)	9	NM_001310645	668923	Mm.393876	NM_001177550	ENSMUSG00000068130	Zfp442	OTTMUSG00000015730|ZIPO-II	zinc finger protein 442	protein-coding
Peaks_1772	chr14	88470762	88471206	+	0	NA	exon (NM_178685, exon 2 of 3)	exon (NM_178685, exon 2 of 3)	412	NM_178685	219257	Mm.128861	NM_178685	ENSMUSG00000050505	Pcdh20	C630015B17Rik|Pcdh13	protocadherin 20	protein-coding
Peaks_1059	chr1	64383803	64385178	+	0	NA	Intergenic	IAPEz-int|LTR|ERVK	-148314	NM_133828	12912	Mm.422634	NM_009952	ENSMUSG00000025958	Creb1	2310001E10Rik|3526402H21Rik|AV083133|Creb|Creb-1	cAMP responsive element binding protein 1	protein-coding
Peaks_1410	chr1	19285193	19285720	+	0	NA	Intergenic	RLTR10-int|LTR|ERVK	73402	NM_001025305	21419	Mm.137021	NM_009334	ENSMUSG00000025927	Tfap2b	AI606113|AP-2(beta)|E130018K07Rik|Tcfap2b	transcription factor AP-2 beta	protein-coding
Peaks_1591	chr19	45023929	45024383	+	0	NA	exon (NM_001130526, exon 3 of 5)	exon (NM_001130526, exon 3 of 5)	6021	NM_001130526	226154	Mm.28204	NM_145503	ENSMUSG00000035342	Lzts2	BC014695|LAPSER1|mKIAA1813	leucine zipper, putative tumor suppressor 2	protein-coding
Peaks_1567	chr1	10922805	10923632	+	0	NA	Intergenic	RLTR10-int|LTR|ERVK	-57344	NR_030645	100124448		NR_030645	ENSMUSG00000076948	Mir467e	Mirn467e	microRNA 467e	ncRNA
Peaks_196	chr1	146123402	146123673	+	0	NA	Intergenic	IAPEz-int|LTR|ERVK	-372129	NM_153539	215378	Mm.441817	NM_153539	ENSMUSG00000035131	Brinp3	B830045N13Rik|Fam5c	bone morphogenetic protein/retinoic acid inducible neural specific 3	protein-coding
Peaks_377	chr12	119028228	119028427	+	0	NA	Intergenic	Intergenic	-61906	NM_029961	77706	Mm.261496	NM_029961	ENSMUSG00000072791	Abcb5	9230106F14Rik	ATP-binding cassette, sub-family B (MDR/TAP), member 5	protein-coding
Peaks_1780	chr3	144506193	144506582	+	0	NA	intron (NM_011828, intron 1 of 6)	intron (NM_011828, intron 1 of 6)	63829	NM_011828	23908	Mm.12863	NM_011828	ENSMUSG00000040151	Hs2st1	AW214369|Hs2st|mKIAA0448	heparan sulfate 2-O-sulfotransferase 1	protein-coding
Peaks_1777	chr5	92843879	92844184	+	0	NA	intron (NM_001077595, intron 1 of 9)	intron (NM_001077595, intron 1 of 9)	34649	NM_001077595	27428	Mm.46014	NM_015756	ENSMUSG00000029381	Shroom3	AL022960|D5Ertd287e|Shrm|Shrm3	shroom family member 3	protein-coding
Peaks_425	chr15	93336043	93337530	+	0	NA	non-coding (NR_028315, exon 1 of 5)	non-coding (NR_028315, exon 1 of 5)	149	NR_028315	67057	Mm.4714	NM_024189	ENSMUSG00000022634	Yaf2	2810021M11Rik	YY1 associated factor 2	protein-coding
Peaks_1072	chr11	9481545	9481844	+	0	NA	intron (NM_178259, intron 41 of 61)	intron (NM_178259, intron 41 of 61)	289752	NM_178259	268379	Mm.39270	NM_178259	ENSMUSG00000004668	Abca13	9830132L24|A930002G16Rik|AI956815	ATP-binding cassette, sub-family A (ABC1), member 13	protein-coding
Peaks_576	chr1	16893637	16894131	+	0	NA	Intergenic	MERVL-int|LTR|ERVL	204005	NM_020604	57339	Mm.143761	NM_020604	ENSMUSG00000042686	Jph1	ENSMUSG00000054314|JP-1|Jp1	junctophilin 1	protein-coding
Peaks_981	chr1	66023243	66024048	+	0	NA	Intergenic	IAPEz-int|LTR|ERVK	97123	NM_027010	12969	Mm.275362	NM_027010	ENSMUSG00000025945	Crygf	3110001K11Rik|Cryg-2|DGcry-2|Len-2	crystallin, gamma F	protein-coding
Peaks_843	chr1	173793386	173793576	+	0	NA	Intergenic	L1Md_T|LINE|L1	-26562	NM_008329	15951	Mm.261270	NM_008329	ENSMUSG00000073489	Ifi204	Ifi16|p204	interferon activated gene 204	protein-coding
Peaks_1040	chr6	82402662	82403101	+	0	NA	5' UTR (NM_009313, exon 2 of 6)	5' UTR (NM_009313, exon 2 of 6)	406	NM_009313	21336	Mm.8055	NM_009313	ENSMUSG00000030043	Tacr1	Nk1r|Spr|Tac1r	tachykinin receptor 1	protein-coding
Peaks_528	chr13	14557577	14557961	+	0	NA	Intergenic	(CTGTG)n|Simple_repeat|Simple_repeat	-34543	NM_001081348	94253	Mm.125298	NM_153130	ENSMUSG00000021301	Hecw1	9330116H24Rik|AV273951|E130207I19Rik|Nedl1	HECT, C2 and WW domain containing E3 ubiquitin protein ligase 1	protein-coding
Peaks_1521	chr10	41071435	41072365	+	0	NA	promoter-TSS (NM_199058)	promoter-TSS (NM_199058)	-316	NM_199058	140741	Mm.290693	NM_199058	ENSMUSG00000046922	Gpr6	AI852874|Gm233	G protein-coupled receptor 6	protein-coding
Peaks_728	chr9	86981649	86981921	+	0	NA	Intergenic	Intergenic	-33752	NM_001037907	382089	Mm.92244	NM_001037907	ENSMUSG00000047897	Ripply2	C030002E08Rik|Gm1122	ripply transcriptional repressor 2	protein-coding
Peaks_569	chr3	159011145	159011613	+	0	NA	Intergenic	ORR1F|LTR|ERVL-MaLR	-64985	NR_040750	624759	Mm.491054	NR_040750	ENSMUSG00000106053	Gm20752	-	predicted gene, 20752	ncRNA
Peaks_241	chr10	105227632	105228093	+	0	NA	intron (NM_177368, intron 11 of 11)	intron (NM_177368, intron 11 of 11)	346617	NM_177368	278279	Mm.25225	NM_177368	ENSMUSG00000036019	Tmtc2	8430438D04Rik|D330034A10Rik	transmembrane and tetratricopeptide repeat containing 2	protein-coding
Peaks_1415	chr18	38765456	38765812	+	0	NA	Intergenic	Intergenic	-126822	NM_001033789	545253	Mm.244585	NM_001033789	ENSMUSG00000036452	Gm5820	EG545253	predicted gene 5820	protein-coding
Peaks_323	chr14	3144383	3144853	+	0	NA	Intergenic	RLTR45-int|LTR|ERVK	-43666	NM_001270806	544990	Mm.360540	NM_001270806	ENSMUSG00000079409	Gm5795	-	predicted gene 5795	protein-coding
Peaks_1628	chr4	121097699	121098335	+	0	NA	5' UTR (NM_172700, exon 1 of 10)	5' UTR (NM_172700, exon 1 of 10)	226	NM_172700	230709	Mm.34399	NM_172700	ENSMUSG00000043207	Zmpste24	A530043O15Rik|D030046F19|FACE1|Face-1|MADB|STE24|Ste24p	zinc metallopeptidase, STE24	protein-coding
Peaks_1299	chr1	8688231	8689954	+	0	NA	intron (NM_027671, intron 6 of 20)	L1Md_A|LINE|L1	610785	NM_001290390	71096	Mm.336395	NM_027671	ENSMUSG00000025909	Sntg1	4933426D16Rik|G1SYN|SYN4	syntrophin, gamma 1	protein-coding
Peaks_894	chr17	7315052	7315208	+	0	NA	Intergenic	Intergenic	-9530	NM_011553	21461	Mm.264651	NM_011553	ENSMUSG00000071322	Tcp10a	D17Leh66A|D17Leh66aa|Gm10326|T66A-a|Tcp-10a	t-complex protein 10a	protein-coding
Peaks_465	chr8	20083883	20084248	+	0	NA	Intergenic	Intergenic	213367	NR_030708	547150	Mm.359054	NR_030708	ENSMUSG00000071796	6820431F20Rik	-	cadherin 11 pseudogene	pseudo
Peaks_698	chr3	144519022	144519234	+	0	NA	intron (NM_011828, intron 1 of 6)	intron (NM_011828, intron 1 of 6)	51088	NM_011828	23908	Mm.12863	NM_011828	ENSMUSG00000040151	Hs2st1	AW214369|Hs2st|mKIAA0448	heparan sulfate 2-O-sulfotransferase 1	protein-coding
Peaks_1170	chr15	34837234	34837839	+	0	NA	promoter-TSS (NM_001271704)	promoter-TSS (NM_001271704)	181	NM_181317	16539	Mm.71045	NM_181317	ENSMUSG00000050963	Kcns2	E130006J24Rik|Kv9.2	K+ voltage-gated channel, subfamily S, 2	protein-coding
Peaks_1474	chr1	4220850	4220987	+	0	NA	Intergenic	L1Md_F2|LINE|L1	139396	NM_011283	19888	Mm.294263	NM_011283	ENSMUSG00000025900	Rp1	Dcdc3|Orp1|Rp1h|mG145	retinitis pigmentosa 1 (human)	protein-coding
Peaks_1380	chr5	14985317	14985534	+	0	NA	Intergenic	Lx2A1|LINE|L1	-6526	NM_001281514	100503549	Mm.491086	NM_001281514	ENSMUSG00000072188	Gm10354	ENSMUSG00000072188	predicted gene 10354	protein-coding
Peaks_77	chr1	37777592	37778332	+	0	NA	intron (NM_001290720, intron 15 of 17)	IAPEz-int|LTR|ERVK	-58151	NM_028096	72097	Mm.142607	NM_028096	ENSMUSG00000026090	2010300C02Rik	-	RIKEN cDNA 2010300C02 gene	protein-coding
Peaks_691	chr1	3031415	3031701	+	0	NA	Intergenic	IAPLTR1a_Mm|LTR|ERVK	639940	NM_001011874	497097	Mm.454496	NM_001011874	ENSMUSG00000051951	Xkr4	AY534250|Gm210|XRG4|mKIAA1889	X-linked Kx blood group related 4	protein-coding
Peaks_1313	chr1	146286981	146287678	+	0	NA	Intergenic	IAPEz-int|LTR|ERVK	-208337	NM_153539	215378	Mm.441817	NM_153539	ENSMUSG00000035131	Brinp3	B830045N13Rik|Fam5c	bone morphogenetic protein/retinoic acid inducible neural specific 3	protein-coding
Peaks_19	chr6	103810025	103810348	+	0	NA	Intergenic	Intergenic	154498	NR_144494	100846987		NR_144494		Pou5f1-rs5	Gm21054|Oct4P5|Otf3-rs5|Otf3e	POU domain, class 5, transcription factor 1, related sequence 5	pseudo
Peaks_1142	chr13	116443076	116443489	+	0	NA	Intergenic	Intergenic	-133594	NM_021459	16392	Mm.42242	NM_021459	ENSMUSG00000042258	Isl1	-	ISL1 transcription factor, LIM/homeodomain	protein-coding
Peaks_1127	chr10	22158252	22158907	+	0	NA	promoter-TSS (NM_009016)	promoter-TSS (NM_009016)	-30	NM_009016	19368	Mm.458004	NM_009016		Raet1a	RAE-1alpha|Rae1alpha|Raet1	retinoic acid early transcript 1, alpha	protein-coding
Peaks_884	chr15	93227581	93227963	+	0	NA	Intergenic	Intergenic	47312	NM_001033275	223827	Mm.22819	NM_001033275	ENSMUSG00000036197	Gxylt1	Glt8d3|Gm1228|Gm87	glucoside xylosyltransferase 1	protein-coding
Peaks_1611	chr1	7994909	7995348	+	0	NA	Intergenic	IAPEz-int|LTR|ERVK	906208	NM_183028	319263	Mm.21539	NM_183028	ENSMUSG00000051285	Pcmtd1	8430411F12Rik|A030012M09Rik	protein-L-isoaspartate (D-aspartate) O-methyltransferase domain containing 1	protein-coding
Peaks_1436	chr17	90454430	90456169	+	0	NA	5' UTR (NM_001346961, exon 1 of 6)	5' UTR (NM_001346961, exon 1 of 6)	581	NM_001346958	18189	Mm.478418	NM_020252	ENSMUSG00000024109	Nrxn1	1700062G21Rik|9330127H16Rik|A230068P09Rik|mKIAA0578	neurexin I	protein-coding
Peaks_1010	chr2	68553417	68553647	+	0	NA	Intergenic	RLTR6-int|LTR|ERV1	-28881	NM_177651	227998	Mm.67562	NM_177651	ENSMUSG00000053896	4933409G03Rik	-	RIKEN cDNA 4933409G03 gene	protein-coding
Peaks_1800	chr14	122427575	122427927	+	0	NA	intron (NR_033326, intron 1 of 3)	MIRb|SINE|MIR	23364	NR_033325	328479	Mm.86095	NR_033325	ENSMUSG00000064052	Gm5089	6530402A20|C030005G22Rik|EG328479	predicted gene 5089	ncRNA
Peaks_1740	chr19	17356237	17356840	+	0	NA	intron (NM_010265, intron 1 of 2)	CpG	129	NM_173442	14537	Mm.244825	NM_010265	ENSMUSG00000038843	Gcnt1	5630400D21Rik|B130048E03|C2 GlcNAcT|C2GNT|IGnT	glucosaminyl (N-acetyl) transferase 1, core 2	protein-coding
Peaks_47	chr1	5805839	5807356	+	0	NA	Intergenic	IAPEz-int|LTR|ERVK	110801	NM_010342	226304	Mm.291110	NM_010342	ENSMUSG00000033774	Npbwr1	Gpr7|Nbpwr1	neuropeptides B/W receptor 1	protein-coding
Peaks_429	chr10	95315772	95316095	+	0	NA	intron (NM_009950, intron 2 of 2)	intron (NM_009950, intron 2 of 2)	7776	NM_001330138	12905	Mm.473739	NM_009950	ENSMUSG00000045867	Cradd	RAIDD	CASP2 and RIPK1 domain containing adaptor with death domain	protein-coding
Peaks_1571	chr7	4119428	4119781	+	0	NA	promoter-TSS (NM_001109765)	promoter-TSS (NM_001109765)	74	NM_001001454	57776	Mm.29729	NM_021324	ENSMUSG00000030428	Ttyh1	4930459B04Rik|6330408P11Rik|TTY1|mTTY1|tty	tweety family member 1	protein-coding
Peaks_1421	chr1	164223890	164224516	+	0	NA	Intergenic	RLTR4_Mm|LTR|ERV1	-24843	NM_054087	116914	Mm.35444	NM_054087	ENSMUSG00000040918	Slc19a2	AV276020|AW322295|DDA1|THTR1|TRMA	solute carrier family 19 (thiamine transporter), member 2	protein-coding
Peaks_581	chr1	9176477	9176781	+	0	NA	intron (NM_027671, intron 2 of 20)	L1Md_A|LINE|L1	123248	NM_001290390	71096	Mm.336395	NM_027671	ENSMUSG00000025909	Sntg1	4933426D16Rik|G1SYN|SYN4	syntrophin, gamma 1	protein-coding
Peaks_459	chr9	32791671	32791986	+	0	NA	Intergenic	Intergenic	95786	NM_001038642	23871	Mm.292415	NM_011808	ENSMUSG00000032035	Ets1	AI196000|AI448617|D230050P06|Ets-1|Tpl1|vs	E26 avian leukemia oncogene 1, 5' domain	protein-coding
Peaks_1232	chr1	103211173	103211831	+	0	NA	Intergenic	IAPEz-int|LTR|ERVK	-1557317	NM_011800	23836	Mm.103640	NM_011800	ENSMUSG00000050840	Cdh20	Cdh7	cadherin 20	protein-coding
Peaks_72	chr2	175274804	175275510	+	0	NA	promoter-TSS (NM_001199308)	promoter-TSS (NM_001199308)	32	NM_001199308	100503353	Mm.455970	NM_001199308	ENSMUSG00000078901	Gm14440	OTTMUSG00000016618	predicted gene 14440	protein-coding
Peaks_1457	chr15	96185513	96185852	+	0	NA	intron (NR_028311, intron 1 of 1)	intron (NR_028311, intron 1 of 1)	2882	NR_028311	100043335	Mm.247464	NR_028311		Gm4371	EG667874|Gm8854	eukaryotic translation initiation factor 3, subunit I pseudogene	pseudo
Peaks_325	chr1	192745604	192746521	+	0	NA	intron (NM_144881, intron 3 of 11)	intron (NM_144881, intron 3 of 11)	25157	NM_144881	226861	Mm.145857	NM_144881	ENSMUSG00000037375	Hhat	2810432O22Rik|AI462858|AP-2CRE|Skn|Tg(TFAP2A-cre)1Will	hedgehog acyltransferase	protein-coding
Peaks_1506	chr1	7277257	7277456	+	0	NA	Intergenic	L1Md_F3|LINE|L1	188436	NM_183028	319263	Mm.21539	NM_183028	ENSMUSG00000051285	Pcmtd1	8430411F12Rik|A030012M09Rik	protein-L-isoaspartate (D-aspartate) O-methyltransferase domain containing 1	protein-coding
Peaks_935	chr1	98642621	98643391	+	0	NA	Intergenic	MTA_Mm-int|LTR|ERVL-MaLR	221882	NM_027584	70866	Mm.389164	NM_027584	ENSMUSG00000026336	Slco6d1	4921511I05Rik	solute carrier organic anion transporter family, member 6d1	protein-coding
Peaks_359	chr5	15061178	15061832	+	0	NA	Intergenic	MMERVK10C-int|LTR|ERVK	-28498	NM_182957	66773	Mm.368256	NM_182957	ENSMUSG00000091897	Gm17019	-	predicted gene 17019	protein-coding
Peaks_829	chr1	126861875	126862258	+	0	NA	Intergenic	Intergenic	-31434	NM_176957	210356	Mm.377234	NM_172484	ENSMUSG00000049690	Nckap5	8430408F21|D130011D22Rik|E030049G20Rik|Erih1|Erih2|Gm1548|Nap5	NCK-associated protein 5	protein-coding
Peaks_591	chr1	22157859	22158789	+	0	NA	Intergenic	RLTR10-int|LTR|ERVK	-195674	NM_001310477	226922	Mm.336519	NM_023872	ENSMUSG00000028033	Kcnq5	7730402H11|9230107O05Rik|AA589396|D1Mgi1	potassium voltage-gated channel, subfamily Q, member 5	protein-coding
Peaks_1374	chr7	78948683	78948907	+	0	NA	Intergenic	RMER1B|Other|Other	34560	NM_001113527	57444	Mm.322843	NM_020583	ENSMUSG00000039236	Isg20	1600023I01Rik|2010107M23Rik|20kDa|DnaQL|HEM45	interferon-stimulated protein	protein-coding
Peaks_1228	chr10	103368982	103369500	+	0	NA	intron (NM_001252330, intron 1 of 11)	intron (NM_001252330, intron 1 of 11)	1433	NM_175328	103098	Mm.458408	NM_175328	ENSMUSG00000019894	Slc6a15	AA536730|AI326450|AI326451|v7-3	solute carrier family 6 (neurotransmitter transporter), member 15	protein-coding
Peaks_864	chr11	68591705	68592020	+	0	NA	intron (NM_177779, intron 4 of 6)	intron (NM_177779, intron 4 of 6)	4825	NM_177779	276920	Mm.123046	NM_177779	ENSMUSG00000045915	Ccdc42	A530001H01Rik	coiled-coil domain containing 42	protein-coding
Peaks_239	chr1	9240687	9241302	+	0	NA	intron (NM_027671, intron 1 of 20)	L1Md_T|LINE|L1	58883	NM_001290390	71096	Mm.336395	NM_027671	ENSMUSG00000025909	Sntg1	4933426D16Rik|G1SYN|SYN4	syntrophin, gamma 1	protein-coding
Peaks_1795	chr15	94628808	94629447	+	0	NA	promoter-TSS (NM_178789)	promoter-TSS (NM_178789)	-58	NM_178789	320709	Mm.74873	NM_178789	ENSMUSG00000063296	Tmem117	B930062P21Rik	transmembrane protein 117	protein-coding
Peaks_738	chr3	144828415	144828888	+	0	NA	intron (NM_139148, intron 9 of 13)	L1Md_T|LINE|L1	-9157	NM_030601	80797	Mm.20897	NM_030601	ENSMUSG00000028262	Clca3a2	Clca2	chloride channel accessory 3A2	protein-coding
Peaks_299	chr7	59417179	59417387	+	0	NA	Intergenic	Intergenic	-93134	NR_015479	330544	Mm.9002	NR_015479	ENSMUSG00000100826	C230091D08Rik	-	RIKEN cDNA C230091D08 gene	ncRNA
Peaks_957	chr1	114182622	114183061	+	0	NA	Intergenic	L1Md_T|LINE|L1	-1502296	NM_001077425	636808	Mm.101576	NM_001077425	ENSMUSG00000070695	Cntnap5a	Caspr5-1|EG636808	contactin associated protein-like 5A	protein-coding
Peaks_1657	chr18	82162352	82162667	+	0	NA	Intergenic	Intergenic	-170429	NR_039589	100628596		NR_039589	ENSMUSG00000093036	Mir5127	mmu-mir-5127|mu-mir-5127	microRNA 5127	ncRNA
Peaks_281	chr12	101717986	101719104	+	0	NA	promoter-TSS (NM_001082976)	promoter-TSS (NM_001082976)	-22	NM_001082976	74413	Mm.275939	NM_028924	ENSMUSG00000021187	Tc2n	4933406D09Rik|Mtac2d1|Tac2-N	tandem C2 domains, nuclear	protein-coding
Peaks_92	chr14	86772347	86772911	+	0	NA	exon (NM_019670, exon 26 of 28)	exon (NM_019670, exon 26 of 28)	368485	NM_019670	56419	Mm.440585	NM_019670	ENSMUSG00000022021	Diaph3	4930417P13Rik|Dia2|Diap3|Drf3|mDia2|mKIAA4117|p134MDia2	diaphanous related formin 3	protein-coding
Peaks_107	chr1	29646670	29646992	+	0	NA	Intergenic	MERVL-int|LTR|ERVL	225343	NR_105760	102465174		NR_105760	ENSMUSG00000099257	Mir6342	Gm27268|mmu-mir-6342	microRNA 6342	ncRNA
Peaks_98	chr12	113424216	113425498	+	0	NA	Intergenic	(CAGCT)n|Simple_repeat|Simple_repeat	-64708	NM_001009545	238405	Mm.442216	NM_001009545	ENSMUSG00000051804	Adam6b	4930523C11Rik	a disintegrin and metallopeptidase domain 6B	protein-coding
Peaks_1807	chr2	168741166	168742279	+	0	NA	promoter-TSS (NM_015731)	promoter-TSS (NM_015731)	78	NM_015731	11981	Mm.330819	NM_015731	ENSMUSG00000027546	Atp9a	IIa	ATPase, class II, type 9A	protein-coding
Peaks_1716	chr2	181171299	181171455	+	0	NA	Intergenic	IAPEz-int|LTR|ERVK	-14362	NM_007906	13628	Mm.2645	NM_007906	ENSMUSG00000016349	Eef1a2	Eef1a|S1|wasted|wst	eukaryotic translation elongation factor 1 alpha 2	protein-coding
Peaks_1171	chr6	93672409	93672543	+	0	NA	Intergenic	Intergenic	240487	NR_104594	14924	Mm.217216	NM_010367	ENSMUSG00000045095	Magi1	AIP3|BAP1|Baiap1|Gukmi1|MAGI1c|Magi-1|TNRC19|WWP3|mKIAA4129	membrane associated guanylate kinase, WW and PDZ domain containing 1	protein-coding
Peaks_554	chr1	14083535	14084025	+	0	NA	Intergenic	MTA_Mm-int|LTR|ERVL-MaLR	226419	NM_001310459	14048	Mm.250185	NM_010164	ENSMUSG00000025932	Eya1	bor	EYA transcriptional coactivator and phosphatase 1	protein-coding
Peaks_775	chr1	131720965	131721306	+	0	NA	Intergenic	MTC|LTR|ERVL-MaLR	-22887	NM_177243	320718	Mm.482704	NM_177243	ENSMUSG00000042268	Slc26a9	E030002L01Rik	solute carrier family 26, member 9	protein-coding
Peaks_135	chr13	56785862	56786086	+	0	NA	intron (NM_001302373, intron 9 of 12)	intron (NM_001302373, intron 9 of 12)	82306	NM_001164042	17129	Mm.272920	NM_008541	ENSMUSG00000021540	Smad5	1110051M15Rik|AI451355|Dwf-C|Madh5|MusMLP	SMAD family member 5	protein-coding
Peaks_1062	chr1	11707194	11707850	+	0	NA	intron (NM_001310451, intron 7 of 12)	MTA_Mm-int|LTR|ERVL-MaLR	293417	NM_001160371	320492	Mm.52021	NM_177173	ENSMUSG00000057715	A830018L16Rik	-	RIKEN cDNA A830018L16 gene	protein-coding
Peaks_1634	chr2	57221461	57222124	+	0	NA	Intergenic	RLTR4_MM-int|LTR|ERV1	-15886	NM_001145820	14571	Mm.3711	NM_010274	ENSMUSG00000026827	Gpd2	AA408484|AI448216|AU021455|AW494132|GPDH|Gdm1|Gpd-m|Gpdh-m|TISP38	glycerol phosphate dehydrogenase 2, mitochondrial	protein-coding
Peaks_1422	chr4	43079339	43079585	+	0	NA	intron (NM_001310758, intron 1 of 38)	intron (NM_001310758, intron 1 of 38)	20509	NM_001310758	22249	Mm.128892	NM_021468	ENSMUSG00000028456	Unc13b	Munc13-1|Munc13-2|Unc13a|Unc13h1|Unc13h2	unc-13 homolog B (C. elegans)	protein-coding
Peaks_433	chr7	59726187	59726570	+	0	NA	promoter-TSS (NR_002895).9	promoter-TSS (NR_002895).9	-126	NR_033778	64244		NR_033778	ENSMUSG00000096475	Snord116l1	Pwcr1l1	small nucleolar RNA, C/D box 116-like 1	snoRNA
Peaks_808	chr1	108408921	108409408	+	0	NA	Intergenic	IAPLTR1_Mm|LTR|ERVK	491905	NR_102307	319596	Mm.136054	NR_102306	ENSMUSG00000100457	D830032E09Rik	-	RIKEN cDNA D830032E09 gene	ncRNA
Peaks_89	chr1	13207692	13209029	+	0	NA	intron (NM_001302702, intron 4 of 21)	MERVL-int|LTR|ERVL	-81197	NM_001081209	383491	Mm.309380	NM_001081209	ENSMUSG00000042414	Prdm14	-	PR domain containing 14	protein-coding
Peaks_1226	chr5	120445383	120445654	+	0	NA	Intergenic	Intergenic	13632	NM_008499	16873	Mm.5151	NM_008499	ENSMUSG00000029595	Lhx5	Lim2	LIM homeobox protein 5	protein-coding
Peaks_301	chr1	19626922	19627364	+	0	NA	Intergenic	IAPEz-int|LTR|ERVK	415089	NM_001025305	21419	Mm.137021	NM_009334	ENSMUSG00000025927	Tfap2b	AI606113|AP-2(beta)|E130018K07Rik|Tcfap2b	transcription factor AP-2 beta	protein-coding
Peaks_664	chr4	3230998	3231399	+	0	NA	Intergenic	CpG	-45893	NM_001167535	100312471	Mm.377218	NM_001167535	ENSMUSG00000095982	Vmn1r3	Gm11778|OTTMUSG00000004181	vomeronasal 1 receptor 3	protein-coding
Peaks_308	chr1	6432224	6432466	+	0	NA	Intergenic	IAPEz-int|LTR|ERVK	-54886	NM_001244693	240690	Mm.234612	NM_173868	ENSMUSG00000033740	St18	AV348974|Myt3|NZF-3|Nzf3|mKIAA0535	suppression of tumorigenicity 18	protein-coding
Peaks_202	chr17	29102911	29103155	+	0	NA	Intergenic	Intergenic	9264	NM_007669	12575	Mm.195663	NM_007669	ENSMUSG00000023067	Cdkn1a	CAP20|CDKI|CIP1|Cdkn1|P21|SDI1|Waf1|mda6|p21Cip1|p21WAF	cyclin-dependent kinase inhibitor 1A (P21)	protein-coding
Peaks_84	chr1	4444751	4445651	+	0	NA	Intergenic	L1Md_F2|LINE|L1	-35960	NM_001195662	19888	Mm.294263	NM_011283	ENSMUSG00000025900	Rp1	Dcdc3|Orp1|Rp1h|mG145	retinitis pigmentosa 1 (human)	protein-coding
Peaks_805	chr6	107713134	107713355	+	0	NA	Intergenic	Intergenic	183518	NM_008516	16979	Mm.428543	NM_008516	ENSMUSG00000034648	Lrrn1	2810047E21Rik|NLRR-1	leucine rich repeat protein 1, neuronal	protein-coding
Peaks_430	chr6	3307930	3308285	+	0	NA	intron (NR_036696, intron 1 of 2)	intron (NR_036696, intron 1 of 2)	19588	NR_036696	667335	Mm.380219	NR_036696	ENSMUSG00000106779	Gm8579	EG667335	spermatogenesis associated glutamate (E)-rich protein 4a pseudogene	pseudo
Peaks_856	chr1	5810350	5810465	+	0	NA	Intergenic	IAPEz-int|LTR|ERVK	106991	NM_010342	226304	Mm.291110	NM_010342	ENSMUSG00000033774	Npbwr1	Gpr7|Nbpwr1	neuropeptides B/W receptor 1	protein-coding
Peaks_662	chr1	9791610	9791893	+	0	NA	Intergenic	LTRIS_Mm|LTR|ERV1	-6379	NM_133220	170755	Mm.336410	NM_133220	ENSMUSG00000025915	Sgk3	2510015P22Rik|A330005P07Rik|Cisk|fy|fz	serum/glucocorticoid regulated kinase 3	protein-coding
Peaks_1651	chr7	38183004	38184259	+	0	NA	promoter-TSS (NM_028166)	promoter-TSS (NM_028166)	-156	NM_028166	72244	Mm.187554	NM_028166		1600014C10Rik	AI428873	RIKEN cDNA 1600014C10 gene	protein-coding
Peaks_1087	chr1	84543586	84543965	+	0	NA	intron (NM_152915, intron 4 of 12)	MERVL-int|LTR|ERVL	-152064	NR_039588	100628595		NR_039588	ENSMUSG00000093254	Mir5126	mir-5126|mmu-mir-5126|mu-mir-5126	microRNA 5126	ncRNA
Peaks_815	chr8	69382505	69382622	+	0	NA	intron (NR_038043, intron 1 of 5)	RLTR10-int|LTR|ERVK	12981	NR_038044	378466	Mm.37846	NM_194351	ENSMUSG00000110444	Gm10033	9330175B10Rik|ENSMUSG00000057924|Gm10311	predicted gene 10033	ncRNA
Peaks_1479	chrX	170009072	170009428	+	0	NA	Intergenic	(CCG)n|Simple_repeat|Simple_repeat	-30333	NR_029457	654820	Mm.34441	NM_001039559	ENSMUSG00000072844	G530011O06Rik	-	RIKEN cDNA G530011O06 gene	ncRNA
Peaks_178	chr1	194662983	194663273	+	0	NA	intron (NM_008882, intron 3 of 31)	intron (NM_008882, intron 3 of 31)	43299	NM_008882	18845	Mm.2251	NM_008882	ENSMUSG00000026640	Plxna2	2810428A13Rik|AA589422|AW457381|OCT|PlexA2|Plxn2|mKIAA0463	plexin A2	protein-coding
Peaks_1429	chr14	59950038	59950452	+	0	NA	intron (NM_015803, intron 23 of 35)	intron (NM_015803, intron 23 of 35)	136589	NM_015803	50769	Mm.319599	NM_015803	ENSMUSG00000021983	Atp8a2	AI415030|Atpc1b|agil|wl	ATPase, aminophospholipid transporter-like, class I, type 8A, member 2	protein-coding
Peaks_820	chr1	85571952	85572084	+	0	NA	Intergenic	L1Md_F2|LINE|L1	26792	NM_030194	109032	Mm.335802	NM_030194	ENSMUSG00000070034	Sp110	5031415C07Rik|52kDa|5830484A20Rik|ENSMUSG00000075603|Ifi75|Ipr1	Sp110 nuclear body protein	protein-coding
Peaks_61	chr1	29645121	29645388	+	0	NA	Intergenic	MERVL-int|LTR|ERVL	223766	NR_105760	102465174		NR_105760	ENSMUSG00000099257	Mir6342	Gm27268|mmu-mir-6342	microRNA 6342	ncRNA
Peaks_1605	chr10	78752366	78753165	+	0	NA	exon (NM_027630, exon 1 of 7)	exon (NM_027630, exon 1 of 7)	302	NM_027630	70976	Mm.188505	NM_027630	ENSMUSG00000078442	Ccdc105	4931413A09Rik	coiled-coil domain containing 105	protein-coding
Peaks_673	chr1	16743262	16743351	+	0	NA	Intergenic	IAPEz-int|LTR|ERVK	54850	NM_016923	17087	Mm.116844	NM_016923	ENSMUSG00000025779	Ly96	ESOP-1|MD-2|MD2	lymphocyte antigen 96	protein-coding
Peaks_267	chr12	116202588	116202884	+	0	NA	Intergenic	Intergenic	60289	NM_146039	217935	Mm.31382	NM_146039	ENSMUSG00000042050	Wdr60	D430033N04Rik	WD repeat domain 60	protein-coding
Peaks_117	chrX	137107017	137107572	+	0	NA	Intergenic	Intergenic	13032	NM_007957	13984	Mm.8017	NM_007957	ENSMUSG00000023443	Esx1	Spx1	extraembryonic, spermatogenesis, homeobox 1	protein-coding
Peaks_1558	chr2	179292613	179293199	+	0	NA	Intergenic	Intergenic	-122030	NM_026596	68175	Mm.158187	NM_026596		4930591A17Rik	-	RIKEN cDNA 4930591A17 gene	protein-coding
Peaks_36	chr1	10384857	10385015	+	0	NA	intron (NM_177834, intron 8 of 10)	L1Md_T|LINE|L1	-152266	NM_001102430	211673	Mm.229141	NM_001102430	ENSMUSG00000067851	Arfgef1	ARFGEP1|BIG1|D130059B05Rik|D730028O18Rik|P200	ADP-ribosylation factor guanine nucleotide-exchange factor 1(brefeldin A-inhibited)	protein-coding
Peaks_1862	chr10	62208487	62208940	+	0	NA	intron (NM_197996, intron 1 of 7)	intron (NM_197996, intron 1 of 7)	-14486	NR_106122	102465767		NR_106122	ENSMUSG00000099185	Mir7662	Gm27876|mmu-mir-7662	microRNA 7662	ncRNA
Peaks_1500	chr18	58048458	58048684	+	0	NA	exon (NM_010181, exon 44 of 65)	exon (NM_010181, exon 44 of 65)	161355	NM_010181	14119	Mm.20271	NM_010181	ENSMUSG00000024598	Fbn2	BC063774|Fib-2|mKIAA4226|sne|sy	fibrillin 2	protein-coding
Peaks_1298	chr1	21583535	21583960	+	0	NA	intron (NM_001310477, intron 2 of 12)	IAPEz-int|LTR|ERVK	200191	NM_001113187	98582	Mm.326336	NM_001113187	ENSMUSG00000085079	Khdc1b	AU014713|AU015226|AU024076|AY238603|C85331|C86372|C88118|Khdc1|Khdc1c	KH domain containing 1B	protein-coding
Peaks_1784	chr7	34759607	34759725	+	0	NA	intron (NM_175140, intron 1 of 3)	intron (NM_175140, intron 1 of 3)	53045	NM_175140	68947	Mm.29380	NM_175140	ENSMUSG00000060402	Chst8	1500011J21Rik|AI426009	carbohydrate (N-acetylgalactosamine 4-0) sulfotransferase 8	protein-coding
Peaks_495	chr9	63615212	63615422	+	0	NA	intron (NM_025857, intron 1 of 9)	intron (NM_025857, intron 1 of 9)	12662	NM_025857	66939	Mm.34338	NM_025857	ENSMUSG00000037257	Aagab	2310007F21Rik|p34	alpha- and gamma-adaptin binding protein	protein-coding
Peaks_250	chr1	4082819	4083120	+	0	NA	Intergenic	L1Md_A|LINE|L1	277345	NM_011283	19888	Mm.294263	NM_011283	ENSMUSG00000025900	Rp1	Dcdc3|Orp1|Rp1h|mG145	retinitis pigmentosa 1 (human)	protein-coding
Peaks_133	chr1	6566869	6567066	+	0	NA	intron (NM_001244693, intron 2 of 22)	L1Md_T|LINE|L1	79736	NM_001244692	240690	Mm.234612	NM_173868	ENSMUSG00000033740	St18	AV348974|Myt3|NZF-3|Nzf3|mKIAA0535	suppression of tumorigenicity 18	protein-coding
Peaks_1738	chr1	170868544	170868859	+	0	NA	promoter-TSS (NM_001081304)	promoter-TSS (NM_001081304)	-930	NM_001081304	226641	Mm.377046	NM_001081304	ENSMUSG00000026663	Atf6	9130025P16Rik|9630036G24|AA789574|Atf6alpha|ESTM49	activating transcription factor 6	protein-coding
Peaks_1724	chr18	81096147	81096622	+	0	NA	Intergenic	Intergenic	-109806	NM_178280	20689	Mm.215917	NM_178280	ENSMUSG00000024565	Sall3	B130022O04Rik|Msal|Msal-1|Sal|Salt|Spalt	sal-like 3 (Drosophila)	protein-coding
Peaks_701	chr1	5677184	5677633	+	0	NA	Intergenic	MMETn-int|LTR|ERVK	88915	NM_001204371	18387	Mm.7977	NM_011011	ENSMUSG00000025905	Oprk1	K-OR-1|KOR|KOR-1|MSL-1|Oprk2|R21	opioid receptor, kappa 1	protein-coding
Peaks_145	chrX	75744389	75745139	+	0	NA	intron (NR_029443, intron 5 of 8)	intron (NR_029443, intron 5 of 8)	19935	NR_029443	74396	Mm.162493	NR_029443	ENSMUSG00000087396	4933407K13Rik	A130080L05Rik	RIKEN cDNA 4933407K13 gene	ncRNA
Peaks_1825	chr3	87150646	87151078	+	0	NA	intron (NM_001170985, intron 1 of 15)	intron (NM_001170985, intron 1 of 15)	23885	NM_001170985	170643	Mm.89552	NM_130867	ENSMUSG00000041734	Kirrel	6720469N11Rik|Kirrel1|Neph1	kin of IRRE like (Drosophila)	protein-coding
Peaks_1094	chr1	11718537	11719140	+	0	NA	intron (NM_001310451, intron 7 of 12)	L1Md_T|LINE|L1	304733	NM_001160371	320492	Mm.52021	NM_177173	ENSMUSG00000057715	A830018L16Rik	-	RIKEN cDNA A830018L16 gene	protein-coding
Peaks_627	chr9	6168295	6168971	+	0	NA	promoter-TSS (NM_027924)	promoter-TSS (NM_027924)	21	NM_027924	71785	Mm.390122	NM_027924	ENSMUSG00000032006	Pdgfd	1110003I09Rik	platelet-derived growth factor, D polypeptide	protein-coding
Peaks_979	chr6	107012910	107013749	+	0	NA	Intergenic	Intergenic	-213242	NM_175357	58799	Mm.290085	NM_021449	ENSMUSG00000005362	Crbn	2610203G15Rik|2900045O07Rik|AF229032|AW108261|piL	cereblon	protein-coding
Peaks_484	chr8	56189585	56189803	+	0	NA	Intergenic	ORR1A2|LTR|ERVL-MaLR	-104858	NM_008278	15446	Mm.18832	NM_008278	ENSMUSG00000031613	Hpgd	15-PGDH|AV026552	hydroxyprostaglandin dehydrogenase 15 (NAD)	protein-coding
Peaks_1764	chr5	130448399	130449620	+	0	NA	5' UTR (NM_021371, exon 1 of 6)	5' UTR (NM_021371, exon 1 of 6)	217	NM_021371	140904	Mm.40875	NM_021371	ENSMUSG00000060371	Caln1	9630012C17Rik|Cabp8|MNCb-0849	calneuron 1	protein-coding
Peaks_414	chr1	16947274	16948055	+	0	NA	Intergenic	L1Md_T|LINE|L1	150225	NM_020604	57339	Mm.143761	NM_020604	ENSMUSG00000042686	Jph1	ENSMUSG00000054314|JP-1|Jp1	junctophilin 1	protein-coding
Peaks_1305	chr1	27194939	27195062	+	0	NA	Intergenic	L1Md_A|LINE|L1	-507540	NM_001033764	210940	Mm.297614	NM_001033764	ENSMUSG00000073722	4931408C20Rik	-	RIKEN cDNA 4931408C20 gene	protein-coding
Peaks_1178	chr10	24835969	24836242	+	0	NA	promoter-TSS (NM_134005)	promoter-TSS (NM_134005)	90	NM_134005	209558	Mm.338425	NM_134005	ENSMUSG00000019989	Enpp3	AI876438|CD203c	ectonucleotide pyrophosphatase/phosphodiesterase 3	protein-coding
Peaks_153	chr6	61179895	61181045	+	0	NA	5' UTR (NM_183310, exon 1 of 11)	5' UTR (NM_183310, exon 1 of 11)	145	NM_183310	232035	Mm.150324	NM_183310	ENSMUSG00000039578	Ccser1	6230405M12Rik|C130092O11Rik|Fam190a	coiled-coil serine rich 1	protein-coding
Peaks_721	chr13	117958968	117959407	+	0	NA	intron (NM_010408, intron 6 of 7)	RMER17B|LTR|ERVK	-239176	NR_045508	71100	Mm.414841	NR_045508	ENSMUSG00000079048	4933413L06Rik	-	RIKEN cDNA 4933413L06 gene	ncRNA
Peaks_1454	chr4	41808595	41809255	+	0	NA	Intergenic	Intergenic	-34749	NM_001347065	20301	Mm.335946	NM_011336	ENSMUSG00000073888	Ccl27a	ALP|AW558992|CTACK|CTAK|Ccl27|ESkine|ILC|PESKY|Scya27|Scya27a	chemokine (C-C motif) ligand 27A	protein-coding
Peaks_1789	chr6	56652040	56652723	+	0	NA	Intergenic	CpG	52318	NM_025520	66373	Mm.25642	NM_025520	ENSMUSG00000091625	Lsm5	2010208O10Rik|2310034K10Rik	LSM5 homolog, U6 small nuclear RNA and mRNA degradation associated	protein-coding
Peaks_1347	chr5	20512831	20513123	+	0	NA	intron (NM_001170746, intron 10 of 22)	intron (NM_001170746, intron 10 of 22)	369147	NM_172992	68770	Mm.86410	NM_172992	ENSMUSG00000039987	Phtf2	1110054G21Rik|9530062N20Rik|AI447096|C77923	putative homeodomain transcription factor 2	protein-coding
Peaks_993	chr19	48090459	48090729	+	0	NA	Intergenic	Intergenic	-115431	NM_025696	66673	Mm.70980	NM_025696	ENSMUSG00000063434	Sorcs3	6330404A12Rik|AW045579	sortilin-related VPS10 domain containing receptor 3	protein-coding
Peaks_1594	chr6	128651301	128651443	+	0	NA	Intergenic	ERVB4_2-LTR_MM|LTR|ERVK	-11013	NM_053165	94071	Mm.197689	NM_053165	ENSMUSG00000030364	Clec2h	Clrf|clr-f	C-type lectin domain family 2, member h	protein-coding
Peaks_1275	chr6	47749166	47749327	+	0	NA	Intergenic	CpG	3679	NR_002841	19799		NR_002841		Rn4.5s	-	4.5S RNA	rRNA
Peaks_1230	chr4	69195648	69195956	+	0	NA	Intergenic	Intergenic	-241405	NM_019967	56710	Mm.248788	NM_019967	ENSMUSG00000028351	Brinp1	BRINP|Dbc1|Dbccr1|Fam5a	bone morphogenic protein/retinoic acid inducible neural specific 1	protein-coding
Peaks_984	chr2	181670358	181671090	+	0	NA	exon (NM_009236, exon 2 of 2)	exon (NM_009236, exon 2 of 2)	916	NM_009236	20672	Mm.264904	NM_009236	ENSMUSG00000046470	Sox18	AI385749|Ra|Ragl	SRY (sex determining region Y)-box 18	protein-coding
Peaks_654	chr1	36750441	36751257	+	0	NA	intron (NR_040290, intron 8 of 8)	MTA_Mm-int|LTR|ERVL-MaLR	-10949	NM_009539	22637	Mm.8038	NM_009539	ENSMUSG00000026117	Zap70	Srk|ZAP-70|mrtle|mur	zeta-chain (TCR) associated protein kinase	protein-coding
Peaks_441	chr1	119965743	119966199	+	0	NA	intron (NM_001115074, intron 5 of 22)	intron (NM_001115074, intron 5 of 22)	29239	NM_001115074	226356	Mm.297290	NM_001115074	ENSMUSG00000036962	Cfap221	Gm101|Pcdp1	cilia and flagella associated protein 221	protein-coding
Peaks_825	chr1	26352191	26352482	+	0	NA	Intergenic	IAPEz-int|LTR|ERVK	335124	NM_001033764	210940	Mm.297614	NM_001033764	ENSMUSG00000073722	4931408C20Rik	-	RIKEN cDNA 4931408C20 gene	protein-coding
Peaks_967	chr16	50732324	50733037	+	0	NA	promoter-TSS (NR_028300)	promoter-TSS (NR_028300)	93	NR_028300	68190	Mm.139089	NR_028300		Dubr	5330426P16Rik|Dum	Dppa2 upstream binding RNA	ncRNA
Peaks_838	chr9	124281877	124282618	+	0	NA	Intergenic	Intergenic	30447	NM_001243118	630836	Mm.458553	NM_001243117	ENSMUSG00000074829	2010315B03Rik	BC029716	RIKEN cDNA 2010315B03 gene	protein-coding
Peaks_1016	chr7	59476441	59476645	+	0	NA	Intergenic	Intergenic	-152394	NR_015479	330544	Mm.9002	NR_015479	ENSMUSG00000100826	C230091D08Rik	-	RIKEN cDNA C230091D08 gene	ncRNA
Peaks_395	chr1	28284821	28285109	+	0	NA	Intergenic	L1Md_F2|LINE|L1	495287	NM_001013750	210962	Mm.214178	NM_001013750	ENSMUSG00000048411	Gm597	-	predicted gene 597	protein-coding
Peaks_1413	chr1	4440734	4441273	+	0	NA	Intergenic	L1Md_F2|LINE|L1	-31762	NM_001195662	19888	Mm.294263	NM_011283	ENSMUSG00000025900	Rp1	Dcdc3|Orp1|Rp1h|mG145	retinitis pigmentosa 1 (human)	protein-coding
Peaks_717	chr1	27180211	27180453	+	0	NA	Intergenic	IAPLTR1_Mm|LTR|ERVK	-492872	NM_001033764	210940	Mm.297614	NM_001033764	ENSMUSG00000073722	4931408C20Rik	-	RIKEN cDNA 4931408C20 gene	protein-coding
Peaks_679	chr6	137528832	137529056	+	0	NA	intron (NM_001271595, intron 3 of 20)	intron (NM_001271595, intron 3 of 20)	-9049	NM_001271589	13860	Mm.235346	NM_007945	ENSMUSG00000015766	Eps8	AW261790	epidermal growth factor receptor pathway substrate 8	protein-coding
Peaks_1532	chr1	118147588	118148220	+	0	NA	Intergenic	RLTR6-int|LTR|ERV1	163228	NM_011650	22099	Mm.426637	NM_011650	ENSMUSG00000026374	Tsn	2610034C24Rik|AU040286|C3PO|TB-RBP	translin	protein-coding
Peaks_253	chrX	3199644	3199852	+	0	NA	Intergenic	L1_Mur3|LINE|L1	122828	NM_001270667	100861966	Mm.443264	NM_001270667	ENSMUSG00000100249	Btbd35f23	Gm21950|Mgclh	BTB domain containing 35, family member 23	protein-coding
Peaks_1746	chr2	46578426	46578639	+	0	NA	Intergenic	IAPEz-int|LTR|ERVK	881927	NR_040497	69405	Mm.396184	NR_040497	ENSMUSG00000086202	1700019E08Rik	-	RIKEN cDNA 1700019E08 gene	ncRNA
Peaks_50	chr1	6149129	6149247	+	0	NA	Intergenic	L1Md_T|LINE|L1	-65474	NM_009826	12421	Mm.293811	NM_009826	ENSMUSG00000025907	Rb1cc1	2900055E04Rik|5930404L04Rik|Cc1|FIP200|LaXp180	RB1-inducible coiled-coil 1	protein-coding
Peaks_781	chr7	35156719	35157111	+	0	NA	Intergenic	Intergenic	-29470	NM_017394	53896	Mm.35567	NM_017394	ENSMUSG00000030495	Slc7a10	AL024237|Asc-1|D7Bwg0847e	solute carrier family 7 (cationic amino acid transporter, y+ system), member 10	protein-coding
Peaks_1664	chr2	139989621	139989866	+	0	NA	intron (NR_110351, intron 6 of 13)	intron (NR_110351, intron 6 of 13)	77062	NM_001159640	75812	Mm.293449	NM_175225	ENSMUSG00000039033	Tasp1	4930485D02Rik|AW986064	taspase, threonine aspartase 1	protein-coding
Peaks_559	chr1	7995418	7996260	+	0	NA	Intergenic	IAPEz-int|LTR|ERVK	906919	NM_183028	319263	Mm.21539	NM_183028	ENSMUSG00000051285	Pcmtd1	8430411F12Rik|A030012M09Rik	protein-L-isoaspartate (D-aspartate) O-methyltransferase domain containing 1	protein-coding
Peaks_710	chr18	81647594	81647935	+	0	NA	Intergenic	Intergenic	344316	NR_039589	100628596		NR_039589	ENSMUSG00000093036	Mir5127	mmu-mir-5127|mu-mir-5127	microRNA 5127	ncRNA
Peaks_1399	chr2	64626879	64627127	+	0	NA	Intergenic	MMERVK10C-int|LTR|ERVK	395763	NM_016719	50915	Mm.214554	NM_016719	ENSMUSG00000026888	Grb14	AI505286	growth factor receptor bound protein 14	protein-coding
Peaks_897	chr5	118336858	118337425	+	0	NA	Intergenic	(TCCA)n|Simple_repeat|Simple_repeat	91914	NM_001081236	76792	Mm.103428	NM_001081236	ENSMUSG00000032840	2410131K14Rik	-	RIKEN cDNA 2410131K14 gene	protein-coding
Peaks_827	chr1	175936381	175936814	+	0	NA	Intergenic	Intergenic	16268	NM_001290692	226720	Mm.11282	NM_001290692	ENSMUSG00000104158	Becn2	Beclin-2|Gm104	beclin 2	protein-coding
Peaks_507	chr16	72412849	72413165	+	0	NA	Intergenic	Intergenic	-178680	NR_131115	319533	Mm.373754	NR_131115		8030451O07Rik	-	RIKEN cDNA 8030451O07 gene	ncRNA
Peaks_20	chr18	42975721	42976095	+	0	NA	intron (NM_028392, intron 1 of 8)	T-rich|Low_complexity|Low_complexity	-76402	NR_073583	72930	Mm.26134	NM_027531	ENSMUSG00000024500	Ppp2r2b	2900026H06Rik|6330404L05Rik|E130009M08Rik|PP2A-PR55B|PR55-BETA|SCA12	protein phosphatase 2, regulatory subunit B, beta	protein-coding
Peaks_1770	chr12	57197189	57197430	+	0	NA	5' UTR (NM_172577, exon 1 of 10)	5' UTR (NM_172577, exon 1 of 10)	163	NM_172577	217593	Mm.32835	NM_172577	ENSMUSG00000035472	Slc25a21	9930033G19Rik|A630030I10|BB158148	solute carrier family 25 (mitochondrial oxodicarboxylate carrier), member 21	protein-coding
Peaks_244	chr8	112156706	112157062	+	0	NA	Intergenic	Intergenic	145525	NM_020584	57321	Mm.213064	NM_020584	ENSMUSG00000033430	Terf2ip	Rap1	telomeric repeat binding factor 2, interacting protein	protein-coding
Peaks_373	chr3	127161309	127161732	+	0	NA	intron (NR_105030, intron 1 of 2)	intron (NR_105030, intron 1 of 2)	215	NR_105029	100862268	Mm.444603	NR_105029	ENSMUSG00000097456	LOC100862268	-	uncharacterized LOC100862268	ncRNA
Peaks_42	chr1	111227703	111227797	+	0	NA	Intergenic	L1Md_F2|LINE|L1	-250378	NM_001081386	227485	Mm.322070	NM_001081386	ENSMUSG00000047216	Cdh19	-	cadherin 19, type 2	protein-coding
Peaks_1488	chr2	115513726	115514229	+	0	NA	Intergenic	Intergenic	-1776	NR_030712	100043232	Mm.240112	NR_030712	ENSMUSG00000085582	3110099E03Rik	-	RIKEN cDNA 3110099E03 gene	ncRNA
Peaks_1545	chr1	12217350	12217679	+	0	NA	Intergenic	L1Md_A|LINE|L1	-208472	NR_105759	102465961		NR_105759	ENSMUSG00000098555	Mir6341	Gm27262|mmu-mir-6341	microRNA 6341	ncRNA
Peaks_1386	chr4	114405728	114407142	+	0	NA	promoter-TSS (NM_001085549)	promoter-TSS (NM_001085549)	-289	NM_001085549	666048	Mm.331779	NM_001085549	ENSMUSG00000070867	Trabd2b	Gm12824|Hkat|OTTMUSG00000008561	TraB domain containing 2B	protein-coding
Peaks_452	chr1	34917076	34917348	+	0	NA	Intergenic	IAPEz-int|LTR|ERVK	67253	NM_145516	226971	Mm.292751	NM_145516	ENSMUSG00000026123	Plekhb2	2310009M15Rik|AU018239|Evt2|Phdc|evt-2	pleckstrin homology domain containing, family B (evectins) member 2	protein-coding
Peaks_567	chr1	23537007	23537167	+	0	NA	Intergenic	ORR1A3|LTR|ERVL-MaLR	-153912	NM_001081079	70155	Mm.28013	NM_001081079	ENSMUSG00000026158	Ogfrl1	2210417C17Rik	opioid growth factor receptor-like 1	protein-coding
Peaks_1280	chr9	114822387	114822634	+	0	NA	intron (NM_027294, intron 1 of 3)	B4A|SINE|B4	21642	NM_027294	70031	Mm.150064	NM_027294	ENSMUSG00000041012	Cmtm8	2700018N07Rik|AA408515|Cklfsf8	CKLF-like MARVEL transmembrane domain containing 8	protein-coding
Peaks_1257	chr13	86014679	86014814	+	0	NA	Intergenic	Lx5|LINE|L1	32049	NM_007749	12867	Mm.378898	NM_007749	ENSMUSG00000017778	Cox7c	COXVIIc|Cox7c1	cytochrome c oxidase subunit VIIc	protein-coding
Peaks_1362	chr1	152480822	152481108	+	0	NA	intron (NM_177756, intron 4 of 11)	MERVL-int|LTR|ERVL	81098	NM_177756	269132	Mm.23782	NM_177756	ENSMUSG00000032649	Colgalt2	AI427652|D730024P12|Glt25d2	collagen beta(1-O)galactosyltransferase 2	protein-coding
Peaks_874	chr1	4084298	4085806	+	0	NA	Intergenic	L1Md_A|LINE|L1	275262	NM_011283	19888	Mm.294263	NM_011283	ENSMUSG00000025900	Rp1	Dcdc3|Orp1|Rp1h|mG145	retinitis pigmentosa 1 (human)	protein-coding
Peaks_1075	chr1	19625119	19625347	+	0	NA	Intergenic	IAPEz-int|LTR|ERVK	413179	NM_001025305	21419	Mm.137021	NM_009334	ENSMUSG00000025927	Tfap2b	AI606113|AP-2(beta)|E130018K07Rik|Tcfap2b	transcription factor AP-2 beta	protein-coding
Peaks_112	chr1	35867492	35867711	+	0	NA	Intergenic	MTA_Mm|LTR|ERVL-MaLR	-200799	NM_015818	50785	Mm.213566	NM_015818	ENSMUSG00000045216	Hs6st1	6Ost1	heparan sulfate 6-O-sulfotransferase 1	protein-coding
Peaks_1078	chr2	138837178	138837560	+	0	NA	Intergenic	IAPEz-int|LTR|ERVK	17440	NR_035477	100316816		NR_035477	ENSMUSG00000088983	Mir1952	mmu-mir-1952	microRNA 1952	ncRNA
Peaks_1161	chr1	21582942	21583452	+	0	NA	intron (NM_001310477, intron 2 of 12)	IAPEz-int|LTR|ERVK	199641	NM_001113187	98582	Mm.326336	NM_001113187	ENSMUSG00000085079	Khdc1b	AU014713|AU015226|AU024076|AY238603|C85331|C86372|C88118|Khdc1|Khdc1c	KH domain containing 1B	protein-coding
Peaks_124	chr1	21999593	22000072	+	0	NA	Intergenic	IAPEz-int|LTR|ERVK	-37182	NM_001310477	226922	Mm.336519	NM_023872	ENSMUSG00000028033	Kcnq5	7730402H11|9230107O05Rik|AA589396|D1Mgi1	potassium voltage-gated channel, subfamily Q, member 5	protein-coding
Peaks_1572	chr16	73117410	73117634	+	0	NA	Intergenic	Intergenic	454373	NM_019413	19876	Mm.310772	NM_019413	ENSMUSG00000022883	Robo1	AW494633|AW742721|DUTT1|Gm310	roundabout guidance receptor 1	protein-coding
Peaks_861	chr14	5461359	5461447	+	0	NA	Intergenic	Intergenic	-5955	NM_001291094	100041515	Mm.443041	NM_001205306	ENSMUSG00000096629	Gm3383	ENSMUSG00000079376	predicted gene 3383	protein-coding
Peaks_1539	chr1	103210981	103211120	+	0	NA	Intergenic	IAPEz-int|LTR|ERVK	-1557769	NM_011800	23836	Mm.103640	NM_011800	ENSMUSG00000050840	Cdh20	Cdh7	cadherin 20	protein-coding
Peaks_601	chr18	14918003	14918203	+	0	NA	Intergenic	Intergenic	-70892	NR_045372	74456	Mm.391075	NR_045372		4933424G05Rik	-	RIKEN cDNA 4933424G05 gene	ncRNA
Peaks_1106	chr1	194629305	194629770	+	0	NA	intron (NM_008882, intron 1 of 31)	intron (NM_008882, intron 1 of 31)	9708	NM_008882	18845	Mm.2251	NM_008882	ENSMUSG00000026640	Plxna2	2810428A13Rik|AA589422|AW457381|OCT|PlexA2|Plxn2|mKIAA0463	plexin A2	protein-coding
Peaks_1587	chr9	71230179	71230309	+	0	NA	intron (NM_009022, intron 1 of 13)	intron (NM_009022, intron 1 of 13)	14455	NM_009022	19378	Mm.42016	NM_009022	ENSMUSG00000013584	Aldh1a2	AV116159|Aldh1a7|Raldh1|Raldh2	aldehyde dehydrogenase family 1, subfamily A2	protein-coding
Peaks_206	chr1	7285930	7286087	+	0	NA	Intergenic	L1Md_T|LINE|L1	197088	NM_183028	319263	Mm.21539	NM_183028	ENSMUSG00000051285	Pcmtd1	8430411F12Rik|A030012M09Rik	protein-L-isoaspartate (D-aspartate) O-methyltransferase domain containing 1	protein-coding
Peaks_998	chr4	135573537	135573832	+	0	NA	promoter-TSS (NM_001013756)	promoter-TSS (NM_001013756)	-64	NM_001013756	230824	Mm.331972	NM_001013756	ENSMUSG00000037188	Grhl3	AI561912|Get1|Som|Tfcp2l4|ct	grainyhead-like 3 (Drosophila)	protein-coding
Peaks_770	chr1	76588995	76589194	+	0	NA	Intergenic	IAPEz-int|LTR|ERVK	79534	NR_105761	102465175		NR_105761	ENSMUSG00000098611	Mir6343	Gm27304|mmu-mir-6343	microRNA 6343	ncRNA
Peaks_1563	chr1	18537893	18538635	+	0	NA	Intergenic	L1Md_T|LINE|L1	-273126	NM_001040027	77673	Mm.99530	NM_183124	ENSMUSG00000067773	Defb41	9230102D03Rik|BD-17|Bd-41|Defb16|Defb17|Gm15386|OTTMUSG00000020946|OTTMUSG00000020948	defensin beta 41	protein-coding
Peaks_937	chr4	19296029	19296141	+	0	NA	intron (NM_013927, intron 2 of 17)	IAPEz-int|LTR|ERVK	15235	NM_013927	30952	Mm.445778	NM_013927	ENSMUSG00000056494	Cngb3	CCNC2|CNG6|Cngbeta2	cyclic nucleotide gated channel beta 3	protein-coding
Peaks_1028	chr7	44335626	44336251	+	0	NA	intron (NM_001034115, intron 15 of 24)	GC_rich|Low_complexity|Low_complexity	25674	NM_001034115	243961	Mm.360368	NM_001034115	ENSMUSG00000038738	Shank1	-	SH3/ankyrin domain gene 1	protein-coding
Peaks_163	chr1	15228503	15228765	+	0	NA	Intergenic	L1Md_A|LINE|L1	-83818	NM_001098528	98741	Mm.156081	NM_001033195	ENSMUSG00000092083	Kcnb2	9630047L19Rik|BB130875|Kv2.2	potassium voltage gated channel, Shab-related subfamily, member 2	protein-coding
Peaks_29	chr2	34935077	34935309	+	0	NA	Intergenic	ORR1A3-int|LTR|ERVL-MaLR	-21217	NM_028716	74016	Mm.65691	NM_028716	ENSMUSG00000026873	Phf19	3110009G19Rik|3321402G02Rik	PHD finger protein 19	protein-coding
Peaks_313	chr1	93844991	93845643	+	0	NA	intron (NM_178882, intron 8 of 9)	L1Md_T|LINE|L1	-16027	NM_199366	381334	Mm.482878	NM_199366	ENSMUSG00000094651	Gal3st2	GP3ST|Gm988	galactose-3-O-sulfotransferase 2	protein-coding
Peaks_510	chr14	105499608	105499897	+	0	NA	intron (NR_045921, intron 1 of 2)	intron (NR_045921, intron 1 of 2)	964	NR_045921	74864	Mm.159344	NR_045921	ENSMUSG00000022116	4930449E01Rik	-	RIKEN cDNA 4930449E01 gene	ncRNA
Peaks_792	chr1	111703466	111703573	+	0	NA	Intergenic	IAPLTR1a_Mm|LTR|ERVK	161399	NM_001081316	319901	Mm.103468	NM_001081316	ENSMUSG00000038702	Dsel	9330132E09Rik|DS-epi2	dermatan sulfate epimerase-like	protein-coding
Peaks_1129	chr12	100996585	100996886	+	0	NA	intron (NM_026681, intron 3 of 29)	intron (NM_026681, intron 3 of 29)	25033	NR_035421	100316805		NR_035421	ENSMUSG00000080575	Mir1190	Mirn1190|mmu-mir-1190	microRNA 1190	ncRNA
Peaks_1845	chr17	29107905	29108341	+	0	NA	Intergenic	Intergenic	14354	NM_007669	12575	Mm.195663	NM_007669	ENSMUSG00000023067	Cdkn1a	CAP20|CDKI|CIP1|Cdkn1|P21|SDI1|Waf1|mda6|p21Cip1|p21WAF	cyclin-dependent kinase inhibitor 1A (P21)	protein-coding
Peaks_393	chr14	6407898	6408098	+	0	NA	Intergenic	Intergenic	-120748	NM_001270812	100861615	Mm.488431	NM_001270812	ENSMUSG00000079396	LOC100861615	-	alpha takusan-like	protein-coding
Peaks_343	chr1	14992708	14992897	+	0	NA	Intergenic	L1Md_A|LINE|L1	-73940	NM_177781	277328	Mm.186329	NM_177781	ENSMUSG00000032769	Trpa1	Anktm1|TRPA1b	transient receptor potential cation channel, subfamily A, member 1	protein-coding
Peaks_1112	chr8	104509117	104510278	+	0	NA	intron (NM_180958, intron 1 of 19)	CpG-14407	190	NM_180958	320022	Mm.249775	NM_180958	ENSMUSG00000052616	Terb1	4930532D21Rik|BB085179|Ccdc79	telomere repeat binding bouquet formation protein 1	protein-coding
Peaks_1350	chrX	165810532	165810620	+	0	NA	Intergenic	RLTR6-int|LTR|ERV1	-359878	NM_146238	237221	Mm.209490	NM_146238	ENSMUSG00000040621	Gemin8	B130034M20Rik|B930082C09Rik|BC023488|gemin-8	gem (nuclear organelle) associated protein 8	protein-coding
Peaks_1093	chr1	16828764	16828904	+	0	NA	Intergenic	RLTR45-int|LTR|ERVK	140378	NM_016923	17087	Mm.116844	NM_016923	ENSMUSG00000025779	Ly96	ESOP-1|MD-2|MD2	lymphocyte antigen 96	protein-coding
Peaks_154	chr1	13209718	13211471	+	0	NA	intron (NM_001302702, intron 4 of 21)	MERVL-int|LTR|ERVL	-83431	NM_001081209	383491	Mm.309380	NM_001081209	ENSMUSG00000042414	Prdm14	-	PR domain containing 14	protein-coding
Peaks_514	chr1	29700187	29700625	+	0	NA	Intergenic	RLTR10-int|LTR|ERVK	278918	NR_105760	102465174		NR_105760	ENSMUSG00000099257	Mir6342	Gm27268|mmu-mir-6342	microRNA 6342	ncRNA
Peaks_643	chr7	107661198	107661766	+	0	NA	intron (NM_001163557, intron 3 of 25)	intron (NM_001163557, intron 3 of 25)	54638	NM_001163557	19024	Mm.2817	NM_008905	ENSMUSG00000036528	Ppfibp2	Cclp1	PTPRF interacting protein, binding protein 2 (liprin beta 2)	protein-coding
Peaks_716	chr3	51102049	51102650	+	0	NA	Intergenic	IAPEy-int|LTR|ERVK	-122098	NM_009834	12457	Mm.86541	NM_009834	ENSMUSG00000023087	Noct	AU043840|Ccr4|Ccrn4l	nocturnin	protein-coding
Peaks_35	chr1	194631547	194631945	+	0	NA	intron (NM_008882, intron 1 of 31)	intron (NM_008882, intron 1 of 31)	11917	NM_008882	18845	Mm.2251	NM_008882	ENSMUSG00000026640	Plxna2	2810428A13Rik|AA589422|AW457381|OCT|PlexA2|Plxn2|mKIAA0463	plexin A2	protein-coding
Peaks_218	chr17	89463669	89463760	+	0	NA	Intergenic	MT2_Mm|LTR|ERVL	84473	NR_045952	100043904	Mm.396198	NR_045952		Gm4719	-	predicted gene 4719	ncRNA
Peaks_917	chr1	17473610	17474192	+	0	NA	Intergenic	L1Md_A|LINE|L1	-128000	NM_053191	94227	Mm.442452	NM_053191	ENSMUSG00000067780	Pi15	P24TI|P25TI|PI-15|SugarCrisp	peptidase inhibitor 15	protein-coding
Peaks_1239	chr8	80315366	80315788	+	0	NA	Intergenic	Intergenic	-178468	NM_010369	14934	Mm.13123	NM_010369	ENSMUSG00000051839	Gypa	AI853584|CD235a|GPA	glycophorin A	protein-coding
Peaks_1742	chr1	85164207	85164587	+	0	NA	Intergenic	Intergenic	-35214	NM_001081746	665378	Mm.440912	NM_001081746		Gm7609	EG665378	predicted pseudogene 7609	protein-coding
Peaks_747	chr1	170457685	170458029	+	0	NA	intron (NM_027528, intron 2 of 7)	intron (NM_027528, intron 2 of 7)	99253	NM_027528	70729	Mm.487078	NM_027528	ENSMUSG00000038473	Nos1ap	6330408P19Rik|Capon	nitric oxide synthase 1 (neuronal) adaptor protein	protein-coding
Peaks_1285	chr3	98427356	98428436	+	0	NA	exon (NM_172863, exon 3 of 3)	exon (NM_172863, exon 3 of 3)	29135	NM_001111336	15495	Mm.14309	NM_008294	ENSMUSG00000095143	Hsd3b4	-	hydroxy-delta-5-steroid dehydrogenase, 3 beta- and steroid delta-isomerase 4	protein-coding
Peaks_1550	chr9	87443947	87444216	+	0	NA	Intergenic	Intergenic	-188549	NM_199316	382090	Mm.335338	NM_199316	ENSMUSG00000056919	Cep162	4922501C03Rik|mKIAA1009	centrosomal protein 162	protein-coding
Peaks_1098	chr1	84544068	84544481	+	0	NA	intron (NM_152915, intron 4 of 12)	MERVL-int|LTR|ERVL	-151565	NR_039588	100628595		NR_039588	ENSMUSG00000093254	Mir5126	mir-5126|mmu-mir-5126|mu-mir-5126	microRNA 5126	ncRNA
Peaks_327	chr8	27994221	27994338	+	0	NA	Intergenic	RLTR44E|LTR|ERVK	90574	NR_033590	666422	Mm.484413	NR_033590	ENSMUSG00000110372	Gm8096	EG666422	3-phosphoglycerate dehydrogenase pseudogene	pseudo
Peaks_443	chr1	3175560	3175977	+	0	NA	Intergenic	MT2_Mm|LTR|ERVL	495730	NM_001011874	497097	Mm.454496	NM_001011874	ENSMUSG00000051951	Xkr4	AY534250|Gm210|XRG4|mKIAA1889	X-linked Kx blood group related 4	protein-coding
Peaks_641	chr3	152998213	152998398	+	0	NA	Intergenic	Intergenic	-16098	NM_012028	26938	Mm.40915	NM_012028	ENSMUSG00000039037	St6galnac5	AI851940|Siat7e	ST6 (alpha-N-acetyl-neuraminyl-2,3-beta-galactosyl-1,3)-N-acetylgalactosaminide alpha-2,6-sialyltransferase 5	protein-coding
Peaks_1419	chrX	154102880	154102998	+	0	NA	Intergenic	L1Md_A|LINE|L1	17746	NM_001201358	667256	Mm.46855	NM_001201358	ENSMUSG00000094577	4921511M17Rik	-	RIKEN cDNA 4921511M17 gene	protein-coding
Peaks_503	chr1	91801449	91802130	+	0	NA	exon (NM_007855, exon 1 of 2)	exon (NM_007855, exon 1 of 2)	328	NM_007855	13345	Mm.9474	NM_007855	ENSMUSG00000007805	Twist2	Dermo1|bHLHa39	twist basic helix-loop-helix transcription factor 2	protein-coding
Peaks_1593	chr4	138411037	138411382	+	0	NA	Intergenic	Intergenic	-14751	NM_001081672	625638	Mm.379091	NM_001081672	ENSMUSG00000078235	Fam43b	OTTMUSG00000009974	family with sequence similarity 43, member B	protein-coding
Peaks_1381	chr1	57587213	57587411	+	0	NA	Intergenic	IAPEz-int|LTR|ERVK	-180638	NM_001302963	68736	Mm.288490	NM_001037742	ENSMUSG00000048495	Tyw5	1110034B05Rik	tRNA-yW synthesizing protein 5	protein-coding
Peaks_1733	chr10	124794518	124794783	+	0	NA	Intergenic	Intergenic	325576	NR_028310	75030	Mm.159403	NR_028310		4930503E24Rik	-	eukaryotic translation initiation factor 3, subunit I pseudogene	pseudo
Peaks_1175	chr1	37604216	37605523	+	0	NA	Intergenic	MTA_Mm-int|LTR|ERVL-MaLR	-63853	NM_173870	269181	Mm.25861	NM_173870	ENSMUSG00000026110	Mgat4a	9530018I07Rik|GnT-IVa|glcNAc-T-IVa	mannoside acetylglucosaminyltransferase 4, isoenzyme A	protein-coding
Peaks_1867	chr12	40133479	40134267	+	0	NA	intron (NM_009132, intron 1 of 13)	intron (NM_009132, intron 1 of 13)	355	NM_009132	20259	Mm.2416	NM_009132	ENSMUSG00000002565	Scin	AW545522|adseverin	scinderin	protein-coding
Peaks_176	chr8	39152764	39153526	+	0	NA	Intergenic	(CACAG)n|Simple_repeat|Simple_repeat	-144835	NR_044988	621335	Mm.208080	NR_044988	ENSMUSG00000109827	Gm6213	EG621335	predicted gene 6213	ncRNA
Peaks_1490	chr7	75983053	75983787	+	0	NA	Intergenic	Intergenic	135082	NM_029652	207952	Mm.206223	NM_029652	ENSMUSG00000055652	Klhl25	2810402K13Rik|BC027373|Enc-1	kelch-like 25	protein-coding
Peaks_1267	chr16	78930629	78931601	+	0	NA	5' UTR (NM_139134, exon 1 of 6)	5' UTR (NM_139134, exon 1 of 6)	167	NM_139134	246048	Mm.77895	NM_139134	ENSMUSG00000022860	Chodl	3110074E07Rik|MT75|PRED12	chondrolectin	protein-coding
Peaks_1776	chr1	17958341	17958888	+	0	NA	Intergenic	IAPEz-int|LTR|ERVK	178437	NM_030033	78081	Mm.319913	NM_030033	ENSMUSG00000025774	Crisp4	9230112K08Rik	cysteine-rich secretory protein 4	protein-coding
Peaks_1070	chr7	15129229	15129605	+	0	NA	Intergenic	Intergenic	-259434	NM_145708	246792	Mm.26391	NM_145708	ENSMUSG00000074369	Obox2	-	oocyte specific homeobox 2	protein-coding
Peaks_1398	chr1	82421246	82421403	+	0	NA	intron (NM_029777, intron 6 of 6)	MT2_Mm|LTR|ERVL	82275	NM_001122685	76867	Mm.226994	NM_029777	ENSMUSG00000026142	Rhbdd1	4930418P06Rik|RRP4|mRHBDD1	rhomboid domain containing 1	protein-coding
Peaks_9	chr7	15182489	15182852	+	0	NA	Intergenic	Intergenic	-206181	NM_145708	246792	Mm.26391	NM_145708	ENSMUSG00000074369	Obox2	-	oocyte specific homeobox 2	protein-coding
Peaks_74	chr1	9714881	9715129	+	0	NA	Intergenic	L1Md_F2|LINE|L1	-14796	NM_008651	17864	Mm.479	NM_008651	ENSMUSG00000025912	Mybl1	A-myb|G1-419-6|repro9	myeloblastosis oncogene-like 1	protein-coding
Peaks_254	chr1	10980996	10981434	+	0	NA	Intergenic	MERVL-int|LTR|ERVL	-12250	NM_029525	109294	Mm.123247	NM_029525	ENSMUSG00000048960	Prex2	6230420N16Rik|AI316880|AI553603|C030045D06Rik|D430013K02|Depdc2|P-Rex2	phosphatidylinositol-3,4,5-trisphosphate-dependent Rac exchange factor 2	protein-coding
Peaks_79	chr1	5552590	5552673	+	0	NA	Intergenic	L1Md_A|LINE|L1	-35862	NM_011011	18387	Mm.7977	NM_011011	ENSMUSG00000025905	Oprk1	K-OR-1|KOR|KOR-1|MSL-1|Oprk2|R21	opioid receptor, kappa 1	protein-coding
Peaks_910	chr1	8157206	8157421	+	0	NA	Intergenic	IAPEz-int|LTR|ERVK	1068393	NM_183028	319263	Mm.21539	NM_183028	ENSMUSG00000051285	Pcmtd1	8430411F12Rik|A030012M09Rik	protein-L-isoaspartate (D-aspartate) O-methyltransferase domain containing 1	protein-coding
Peaks_140	chr1	30266079	30266925	+	0	NA	Intergenic	MTA_Mm-int|LTR|ERVL-MaLR	596754	NM_001081080	213109	Mm.194486	NM_025871	ENSMUSG00000048874	Phf3	2310061N19Rik|mKIAA0244	PHD finger protein 3	protein-coding
Peaks_943	chr3	134114528	134114758	+	0	NA	Intergenic	Intergenic	-121852	NM_001004367	319478	Mm.224814	NM_001004367	ENSMUSG00000044365	Cxxc4	9330210J02Rik|C030003J12Rik|Idax	CXXC finger 4	protein-coding
Peaks_296	chr14	34975584	34975896	+	0	NA	intron (NM_008166, intron 3 of 15)	(TGG)n|Simple_repeat|Simple_repeat	81131	NR_029774	723847		NR_029774	ENSMUSG00000065481	Mir346	Mirn346|mir-346|mmu-mir-346	microRNA 346	ncRNA
Peaks_435	chr8	41133236	41134295	+	0	NA	promoter-TSS (NM_001005863)	promoter-TSS (NM_001005863)	-39	NM_001005863	102103	Mm.149438	NM_001005863	ENSMUSG00000045636	Mtus1	AI481402|ATBP135|Atip1|B430010I23Rik|B430305I03Rik|C85752|Cctsg1-440|MD44|MTSG1|mKIAA1288	mitochondrial tumor suppressor 1	protein-coding
Peaks_111	chr2	36015244	36016023	+	0	NA	Intergenic	IAPEz-int|LTR|ERVK	33659	NM_026703	68375	Mm.19834	NM_026703	ENSMUSG00000026895	Ndufa8	0610033L03Rik|AW261656	NADH dehydrogenase (ubiquinone) 1 alpha subcomplex, 8	protein-coding
Peaks_1714	chrY	5627126	5627288	+	0	NA	Intergenic	Intergenic	1540570	NM_001101623	100040160	Mm.482062	NM_001101623	ENSMUSG00000094081	Gm20826	-	predicted gene, 20826	protein-coding
Peaks_291	chr1	11029990	11030976	+	0	NA	intron (NM_029525, intron 1 of 39)	IAPEz-int|LTR|ERVK	37018	NM_029525	109294	Mm.123247	NM_029525	ENSMUSG00000048960	Prex2	6230420N16Rik|AI316880|AI553603|C030045D06Rik|D430013K02|Depdc2|P-Rex2	phosphatidylinositol-3,4,5-trisphosphate-dependent Rac exchange factor 2	protein-coding
Peaks_777	chr2	19356577	19357141	+	0	NA	Intergenic	IAPEz-int|LTR|ERVK	12542	NR_126563	108871	Mm.107666	NR_126563		4930447M23Rik	-	RIKEN cDNA 4930447M23 gene	ncRNA
Peaks_782	chr1	10285418	10285935	+	0	NA	Intergenic	Intergenic	-53006	NM_001102430	211673	Mm.229141	NM_001102430	ENSMUSG00000067851	Arfgef1	ARFGEP1|BIG1|D130059B05Rik|D730028O18Rik|P200	ADP-ribosylation factor guanine nucleotide-exchange factor 1(brefeldin A-inhibited)	protein-coding
Peaks_1499	chr18	89768796	89770131	+	0	NA	promoter-TSS (NM_001039173)	promoter-TSS (NM_001039173)	-327	NM_001039173	623279	Mm.447164	NM_001039173	ENSMUSG00000073514	Dok6	Dok-6	docking protein 6	protein-coding
Peaks_1237	chr1	26416513	26417115	+	0	NA	Intergenic	IAPEz-int|LTR|ERVK	270646	NM_001033764	210940	Mm.297614	NM_001033764	ENSMUSG00000073722	4931408C20Rik	-	RIKEN cDNA 4931408C20 gene	protein-coding
Peaks_544	chr13	81424095	81424355	+	0	NA	exon (NM_054053, exon 72 of 90)	exon (NM_054053, exon 72 of 90)	208919	NM_054053	110789	Mm.288694	NM_054053	ENSMUSG00000069170	Adgrv1	Frings|Gpr98|Mass1|Mgr1|VLGR1	adhesion G protein-coupled receptor V1	protein-coding
Peaks_457	chr1	53694078	53694646	+	0	NA	intron (NM_001252070, intron 3 of 65)	MMVL30-int|LTR|ERV1	12422	NM_001252070	627872	Mm.184692	NM_001252070	ENSMUSG00000096141	Dnah7a	Dnahc7|Dnahc7a|Gm992	dynein, axonemal, heavy chain 7A	protein-coding
Peaks_737	chr2	148752070	148752843	+	0	NA	intron (NM_177655, intron 2 of 3)	intron (NM_177655, intron 2 of 3)	2095	NM_177655	228756	Mm.189390	NM_177655	ENSMUSG00000055177	Cstl1	RCET1|RCET2|RCET3	cystatin-like 1	protein-coding
Peaks_1452	chr2	135140594	135140967	+	0	NA	intron (NM_019677, intron 3 of 32)	intron (NM_019677, intron 3 of 32)	74836	NR_040517	78805	Mm.78702	NR_040517	ENSMUSG00000085247	4930545L23Rik	-	RIKEN cDNA 4930545L23 gene	ncRNA
Peaks_265	chr1	65622737	65623013	+	0	NA	Intergenic	MMERVK10C-int|LTR|ERVK	-303647	NM_027010	12969	Mm.275362	NM_027010	ENSMUSG00000025945	Crygf	3110001K11Rik|Cryg-2|DGcry-2|Len-2	crystallin, gamma F	protein-coding
Peaks_665	chr9	13534239	13534708	+	0	NA	Intergenic	Intergenic	-85516	NM_001013813	270118	Mm.116898	NM_173776	ENSMUSG00000031925	Maml2	5930431H10|BC032967	mastermind like 2 (Drosophila)	protein-coding
Peaks_730	chr1	3922000	3922935	+	0	NA	Intergenic	L1Md_F2|LINE|L1	-250969	NM_001011874	497097	Mm.454496	NM_001011874	ENSMUSG00000051951	Xkr4	AY534250|Gm210|XRG4|mKIAA1889	X-linked Kx blood group related 4	protein-coding
Peaks_622	chr3	141465926	141465999	+	0	NA	intron (NM_001293561, intron 1 of 16)	intron (NM_001293561, intron 1 of 16)	398	NM_001293561	22253	Mm.24430	NM_009472	ENSMUSG00000059921	Unc5c	B130051O18Rik|Unc5h3|rcm	unc-5 netrin receptor C	protein-coding
Peaks_1860	chr1	137275180	137275452	+	0	NA	Intergenic	IAPEz-int|LTR|ERVK	-314868	NM_030676	26424	Mm.16794	NM_030676	ENSMUSG00000026398	Nr5a2	AU020803|D1Ertd308e|Ftf|LRH-1|UF2-H3B	nuclear receptor subfamily 5, group A, member 2	protein-coding
Peaks_105	chr1	84162169	84162933	+	0	NA	intron (NM_001003948, intron 1 of 2)	MERVL-int|LTR|ERVL	56410	NR_105771	102465181		NR_105771	ENSMUSG00000098851	Mir6353	Gm27391|mmu-mir-6353	microRNA 6353	ncRNA
Peaks_1357	chr19	4586901	4587018	+	0	NA	intron (NM_001162946, intron 2 of 20)	intron (NM_001162946, intron 2 of 20)	-7360	NM_008797	18563	Mm.1845	NM_008797	ENSMUSG00000024892	Pcx	Pc|Pcb	pyruvate carboxylase	protein-coding
Peaks_941	chr1	9778434	9778836	+	0	NA	Intergenic	LTRIS_Mm|LTR|ERV1	-19495	NM_133220	170755	Mm.336410	NM_133220	ENSMUSG00000025915	Sgk3	2510015P22Rik|A330005P07Rik|Cisk|fy|fz	serum/glucocorticoid regulated kinase 3	protein-coding
Peaks_1027	chr1	84166625	84167114	+	0	NA	intron (NM_001003948, intron 1 of 2)	MERVL-int|LTR|ERVL	52092	NR_105771	102465181		NR_105771	ENSMUSG00000098851	Mir6353	Gm27391|mmu-mir-6353	microRNA 6353	ncRNA
Peaks_270	chr1	58933394	58933533	+	0	NA	intron (NM_172406, intron 3 of 15)	IAPEz-int|LTR|ERVK	40019	NM_172406	70827	Mm.222887	NM_172406	ENSMUSG00000026028	Trak2	2900022D04Rik|4733401O11Rik|AI480836|AW046271|Als2cr3|CALS-C|GRIF-1|GRIF1|OIP98|mKIAA0549	trafficking protein, kinesin binding 2	protein-coding
Peaks_859	chr1	8254006	8254332	+	0	NA	Intergenic	RLTR6B_Mm|LTR|ERV1	1045708	NM_001290390	71096	Mm.336395	NM_027671	ENSMUSG00000025909	Sntg1	4933426D16Rik|G1SYN|SYN4	syntrophin, gamma 1	protein-coding
Peaks_922	chr4	42025476	42027284	+	0	NA	intron (NR_033506, intron 1 of 3)	intron (NR_033506, intron 1 of 3)	28750	NR_033123	108816	Mm.440578	NM_178649		4933409K07Rik	AV071682|b1402	RIKEN cDNA 4933409K07 gene	pseudo
Peaks_214	chr1	166353563	166354073	+	0	NA	Intergenic	IAPEz-int|LTR|ERVK	-25349	NM_030245	27878	Mm.100665	NM_030245	ENSMUSG00000026563	Tada1	2900026B15Rik|D1Ertd251e|Staf42|Tada1l	transcriptional adaptor 1	protein-coding
Peaks_629	chr5	105365475	105365822	+	0	NA	Intergenic	ETnERV3-int|LTR|ERVK	-19172	NR_132129	634650	Mm.458435	NM_001039647	ENSMUSG00000092021	Gbp11	EG634650|Gm7141	guanylate binding protein 11	protein-coding
Peaks_1054	chr2	106436147	106436451	+	0	NA	Intergenic	Intergenic	86804	NR_040637	329483	Mm.246777	NR_040637	ENSMUSG00000087226	Gm14015	9330126M15|OTTMUSG00000015366	predicted gene 14015	ncRNA
Peaks_303	chr1	13554726	13555355	+	0	NA	Intergenic	IAPEz-int|LTR|ERVK	34870	NM_028173	72265	Mm.28765	NM_028173	ENSMUSG00000025935	Tram1	1810049E02Rik|TRAMP	translocating chain-associating membrane protein 1	protein-coding
Peaks_94	chr14	43089021	43089951	+	0	NA	Intergenic	Intergenic	-73910	NM_001244671	100042055	Mm.429109	NM_001244671	ENSMUSG00000095226	Gm10377	ENSMUSG00000072606	predicted gene 10377	protein-coding
Peaks_67	chr1	69434060	69434310	+	0	NA	Intergenic	Intergenic	251775	NM_011770	22779	Mm.106343	NM_011770	ENSMUSG00000025997	Ikzf2	A730095J18Rik|Helios|Zfpn1a2|Znfn1a2	IKAROS family zinc finger 2	protein-coding
Peaks_1201	chr11	67379622	67379973	+	0	NA	Intergenic	MLT1K|LTR|ERVL-MaLR	52694	NM_001081250	544791	Mm.461064	NM_001081250	ENSMUSG00000060180	Myh13	MyHC-eo	myosin, heavy polypeptide 13, skeletal muscle	protein-coding
Peaks_793	chr1	3347676	3347872	+	0	NA	intron (NM_001011874, intron 2 of 2)	L1Md_T|LINE|L1	323724	NM_001011874	497097	Mm.454496	NM_001011874	ENSMUSG00000051951	Xkr4	AY534250|Gm210|XRG4|mKIAA1889	X-linked Kx blood group related 4	protein-coding
Peaks_1514	chr15	78842351	78843186	+	0	NA	intron (NM_027219, intron 1 of 2)	CpG	121	NM_027219	104445	Mm.307488	NM_027219	ENSMUSG00000049521	Cdc42ep1	1810058K22Rik|AA980734|Borg5|CEP1|MSE55	CDC42 effector protein (Rho GTPase binding) 1	protein-coding
Peaks_289	chr1	139924526	139924905	+	0	NA	Intergenic	MT2_Mm|LTR|ERVL	-66016	NM_001025575	545366	Mm.439660	NM_001025575	ENSMUSG00000033898	Cfhr2	Cfhrb_4/2	complement factor H-related 2	protein-coding
Peaks_1211	chr1	58323743	58323826	+	0	NA	intron (NM_001008419, intron 20 of 35)	IAPEz-int|LTR|ERVK	45458	NM_001008419	213043	Mm.414292	NM_001008419	ENSMUSG00000079554	Aox2	Aoh3|Aox3l1	aldehyde oxidase 2	protein-coding
Peaks_752	chr1	6664057	6664426	+	0	NA	intron (NM_001244693, intron 2 of 22)	MTA_Mm-int|LTR|ERVL-MaLR	-65810	NR_045189	240690	Mm.234612	NM_173868	ENSMUSG00000033740	St18	AV348974|Myt3|NZF-3|Nzf3|mKIAA0535	suppression of tumorigenicity 18	protein-coding
Peaks_1128	chr8	26443098	26443306	+	0	NA	Intergenic	Intergenic	285033	NM_199042	73754	Mm.383241	NM_199042	ENSMUSG00000037214	Thap1	4833431A01Rik|AW490810	THAP domain containing, apoptosis associated protein 1	protein-coding
Peaks_69	chr1	14959940	14960317	+	0	NA	Intergenic	L1Md_A|LINE|L1	-41266	NM_177781	277328	Mm.186329	NM_177781	ENSMUSG00000032769	Trpa1	Anktm1|TRPA1b	transient receptor potential cation channel, subfamily A, member 1	protein-coding
Peaks_1731	chr1	83516446	83517560	+	0	NA	Intergenic	RLTR45|LTR|ERVK	-108803	NM_172430	77629	Mm.154303	NM_172430	ENSMUSG00000026163	Sphkap	4930544G21Rik|A930009L15Rik|AI852220|SKIP|mKIAA1678	SPHK1 interactor, AKAP domain containing	protein-coding
Peaks_799	chr14	121445203	121445544	+	0	NA	Intergenic	Intergenic	59881	NM_053079	56643	Mm.155618	NM_053079	ENSMUSG00000025557	Slc15a1	D630032F02|PECT1|PEPT1	solute carrier family 15 (oligopeptide transporter), member 1	protein-coding
Peaks_1666	chr2	140395001	140396276	+	0	NA	5' UTR (NM_028387, exon 1 of 4)	5' UTR (NM_028387, exon 1 of 4)	203	NM_028387	72899	Mm.229466	NM_028387	ENSMUSG00000068205	Macrod2	1110033L15Rik|2610107G07Rik|2900006F19Rik	MACRO domain containing 2	protein-coding
Peaks_1579	chr8	110726997	110727204	+	0	NA	intron (NM_001310591, intron 3 of 13)	intron (NM_001310591, intron 3 of 13)	1374	NM_001310591	244654	Mm.490385	NM_198625	ENSMUSG00000033763	Mtss1l	ABBA	metastasis suppressor 1-like	protein-coding
Peaks_422	chr1	21996524	21997081	+	0	NA	Intergenic	IAPEz-int|LTR|ERVK	-34152	NM_001310477	226922	Mm.336519	NM_023872	ENSMUSG00000028033	Kcnq5	7730402H11|9230107O05Rik|AA589396|D1Mgi1	potassium voltage-gated channel, subfamily Q, member 5	protein-coding
Peaks_766	chr1	8157617	8159066	+	0	NA	Intergenic	IAPEz-int|LTR|ERVK	1069421	NM_183028	319263	Mm.21539	NM_183028	ENSMUSG00000051285	Pcmtd1	8430411F12Rik|A030012M09Rik	protein-L-isoaspartate (D-aspartate) O-methyltransferase domain containing 1	protein-coding
Peaks_1162	chr2	57218582	57219042	+	0	NA	Intergenic	RLTR4_MM-int|LTR|ERV1	-18866	NM_001145820	14571	Mm.3711	NM_010274	ENSMUSG00000026827	Gpd2	AA408484|AI448216|AU021455|AW494132|GPDH|Gdm1|Gpd-m|Gpdh-m|TISP38	glycerol phosphate dehydrogenase 2, mitochondrial	protein-coding
Peaks_1473	chr2	27129462	27129812	+	0	NA	intron (NM_175427, intron 1 of 2)	intron (NM_175427, intron 1 of 2)	12840	NM_175427	109349	Mm.314080	NM_175427	ENSMUSG00000009216	Fam163b	C630035N08Rik	family with sequence similarity 163, member B	protein-coding
Peaks_482	chr1	186435186	186435809	+	0	NA	Intergenic	Intergenic	123184	NR_131124	320449	Mm.404477	NR_131124	ENSMUSG00000103690	A730004F24Rik	-	RIKEN cDNA A730004F24 gene	ncRNA
Peaks_340	chr15	53338503	53338700	+	0	NA	intron (NM_010162, intron 1 of 10)	intron (NM_010162, intron 1 of 10)	7582	NM_010162	14042	Mm.309395	NM_010162	ENSMUSG00000061731	Ext1	AA409028	exostoses (multiple) 1	protein-coding
Peaks_312	chr1	17957351	17958129	+	0	NA	Intergenic	IAPEz-int|LTR|ERVK	179311	NM_030033	78081	Mm.319913	NM_030033	ENSMUSG00000025774	Crisp4	9230112K08Rik	cysteine-rich secretory protein 4	protein-coding
Peaks_1621	chr1	5255455	5255701	+	0	NA	Intergenic	MERVL-int|LTR|ERVL	172492	NM_001310442	108664	Mm.27082	NM_133826	ENSMUSG00000033793	Atp6v1h	0710001F19Rik|AU022349|CGI-11|SFD|SFDalpha|SFDbeta|VMA13	ATPase, H+ transporting, lysosomal V1 subunit H	protein-coding
Peaks_505	chr8	112569542	112570149	+	0	NA	promoter-TSS (NM_130457)	promoter-TSS (NM_130457)	-198	NM_130457	170571	Mm.209232	NM_130457	ENSMUSG00000031772	Cntnap4	Caspr4|E130114F09Rik	contactin associated protein-like 4	protein-coding
Peaks_1073	chr1	5627808	5628314	+	0	NA	Intergenic	L1Md_T|LINE|L1	39568	NM_001204371	18387	Mm.7977	NM_011011	ENSMUSG00000025905	Oprk1	K-OR-1|KOR|KOR-1|MSL-1|Oprk2|R21	opioid receptor, kappa 1	protein-coding
Peaks_651	chr14	79140349	79140750	+	0	NA	intron (NM_027906, intron 37 of 44)	intron (NM_027906, intron 37 of 44)	106818	NM_001033215	105590	Mm.486536	NM_001033215	ENSMUSG00000071262	Zfp957	AU017455	zinc finger protein 957	protein-coding
Peaks_1291	chr14	5291029	5291423	+	0	NA	Intergenic	Intergenic	97848	NM_001256886	100041678	Mm.443041	NM_001256886	ENSMUSG00000096003	Gm3500	100041758|Gm3401	predicted gene 3500	protein-coding
Peaks_208	chr6	103719496	103719836	+	0	NA	intron (NM_007697, intron 26 of 26)	L1Md_T|LINE|L1	208790	NM_007697	12661	Mm.251288	NM_007697	ENSMUSG00000030077	Chl1	A530023M13Rik|AI465420|CALL|LICAM2	cell adhesion molecule L1-like	protein-coding
Peaks_1559	chr4	136424457	136425217	+	0	NA	intron (NM_001285484, intron 1 of 1)	CpG	225	NM_001285484	15552	Mm.40573	NM_008309	ENSMUSG00000070687	Htr1d	5-HT-1D|5-HT1D|AI853647|Gpcr14|Htr1db	5-hydroxytryptamine (serotonin) receptor 1D	protein-coding
Peaks_1159	chr10	121740547	121740649	+	0	NA	intron (NM_173022, intron 1 of 2)	intron (NM_173022, intron 1 of 2)	661	NM_173022	270802	Mm.209172	NM_173022	ENSMUSG00000053684	BC048403	E030027L10	cDNA sequence BC048403	protein-coding
Peaks_848	chr1	182264002	182264505	+	0	NA	Intergenic	RLTR4_MM-int|LTR|ERV1	18506	NM_007853	13244	Mm.29648	NM_007853	ENSMUSG00000038633	Degs1	AA536663|Degs|Des1|Mdes	delta(4)-desaturase, sphingolipid 1	protein-coding
Peaks_1527	chr1	102644063	102644253	+	0	NA	Intergenic	L1Md_A|LINE|L1	1488390	NR_037989	100504525	Mm.87065	NR_037989	ENSMUSG00000100684	Gm20268	-	predicted gene, 20268	ncRNA
Peaks_883	chr4	60182440	60182933	+	0	NA	Intergenic	IAP-d-int|LTR|ERVK	39854	NM_001347131	100041687	Mm.457982	NM_001134676	ENSMUSG00000078687	Mup8	Gm12809|Mup5|OTTMUSG00000008509	major urinary protein 8	protein-coding
Peaks_222	chr14	103948099	103948332	+	0	NA	Intergenic	Intergenic	78927	NR_045953	73877	Mm.399172	NR_045953		4930432J09Rik	-	RIKEN cDNA 4930432J09 gene	ncRNA
Peaks_1006	chr2	16027057	16027522	+	0	NA	intron (NM_001310455, intron 29 of 38)	RLTR4_MM-int|LTR|ERV1	-329015	NM_026162	67448	Mm.313938	NM_026162	ENSMUSG00000026748	Plxdc2	1200007L24Rik|5430431D22Rik|AI646728|AU022916|AV231634|Tem7r	plexin domain containing 2	protein-coding
Peaks_671	chr10	100335857	100336072	+	0	NA	exon (NM_001166636, exon 1 of 1)	exon (NM_001166636, exon 1 of 1)	288	NM_001166637	100043224	Mm.478257	NM_001166637	ENSMUSG00000094314	Gm4301	-	predicted gene 4301	protein-coding
Peaks_964	chr1	172617466	172617661	+	0	NA	Intergenic	Intergenic	-15012	NM_001164725	677296	Mm.439612	NM_001164725	ENSMUSG00000070504	Fcrl6	ENSMUSG00000070504|FcRH6|mIFGP6|moFcRH6	Fc receptor-like 6	protein-coding
Peaks_485	chr9	76322778	76323832	+	0	NA	exon (NM_198962, exon 1 of 8)	exon (NM_198962, exon 1 of 8)	273	NM_198962	387285	Mm.335300	NM_198962	ENSMUSG00000032360	Hcrtr2	OX2R|mOX2aR|mOX2bR|mOXR2	hypocretin (orexin) receptor 2	protein-coding
Peaks_1034	chr10	93539756	93540263	+	0	NA	promoter-TSS (NM_027908)	promoter-TSS (NM_027908)	24	NM_027908	71761	Mm.244518	NM_027908	ENSMUSG00000015890	Amdhd1	1300019J08Rik	amidohydrolase domain containing 1	protein-coding
Peaks_1827	chr2	23320968	23321798	+	0	NA	5' UTR (NM_008752, exon 1 of 2)	5' UTR (NM_008752, exon 1 of 2)	137	NM_008752	18232	Mm.131616	NM_008752	ENSMUSG00000069132	Nxph2	-	neurexophilin 2	protein-coding
Peaks_1483	chr4	156343446	156343896	+	0	NA	Intergenic	Intergenic	12545	NM_009485	22300	Mm.377117	NM_009485		Vmn2r123	V2r1	vomeronasal 2, receptor 123	protein-coding
Peaks_555	chr1	79864045	79864376	+	0	NA	Intergenic	MT-int|LTR|ERVL-MaLR	-5545	NM_009255	20720	Mm.3093	NM_009255	ENSMUSG00000026249	Serpine2	B230326M24Rik|PAI-1|PI-7|PI7|PN-1|Spi4	serine (or cysteine) peptidase inhibitor, clade E, member 2	protein-coding
Peaks_236	chr1	25526315	25526536	+	0	NA	intron (NM_175642, intron 7 of 30)	L1Md_T|LINE|L1	-248471	NM_001204913	100504323	Mm.484176	NM_001204913		Gm20172	-	predicted gene, 20172	protein-coding
Peaks_1184	chr1	34917566	34917891	+	0	NA	Intergenic	IAPEz-int|LTR|ERVK	67769	NM_145516	226971	Mm.292751	NM_145516	ENSMUSG00000026123	Plekhb2	2310009M15Rik|AU018239|Evt2|Phdc|evt-2	pleckstrin homology domain containing, family B (evectins) member 2	protein-coding
Peaks_362	chr1	169543207	169543601	+	0	NA	Intergenic	IAPEz-int|LTR|ERVK	-11940	NM_023284	66977	Mm.151315	NM_023284	ENSMUSG00000026683	Nuf2	2410003C07Rik|AU044112|C85691|Cdca1|NUF2R	NUF2, NDC80 kinetochore complex component	protein-coding
Peaks_1646	chr2	70883416	70883770	+	0	NA	Intergenic	IAPEz-int|LTR|ERVK	-58113	NM_172664	228012	Mm.136511	NM_172664	ENSMUSG00000041997	Tlk1	4930545J15Rik	tousled-like kinase 1	protein-coding
Peaks_1696	chr16	41551957	41552320	+	0	NA	intron (NM_001347236, intron 1 of 6)	intron (NM_001347236, intron 1 of 6)	18796	NM_175548	268890	Mm.310524	NM_175548	ENSMUSG00000061080	Lsamp	5430428I19|AW046674|B130007O04Rik|D930023J12Rik|Lam|Lamp	limbic system-associated membrane protein	protein-coding
Peaks_282	chr9	86266607	86267134	+	0	NA	Intergenic	Intergenic	198046	NM_027394	70348	Mm.53469	NM_027394	ENSMUSG00000032415	Ube2cbp	2610018I03Rik|Ube3d	ubiquitin-conjugating enzyme E2C binding protein	protein-coding
Peaks_1014	chr7	59728744	59729364	+	0	NA	Intergenic	Intergenic	-2802	NR_033778	64244		NR_033778	ENSMUSG00000096475	Snord116l1	Pwcr1l1	small nucleolar RNA, C/D box 116-like 1	snoRNA
Peaks_1851	chr1	189127576	189127902	+	0	NA	Intergenic	RMER17A|LTR|ERVK	-119899	NM_172650	226823	Mm.209880	NM_172650	ENSMUSG00000026608	Kctd3	4930438A20Rik|9330185B06|E330032J19Rik|NY-REN-45	potassium channel tetramerisation domain containing 3	protein-coding
Peaks_360	chr1	87140035	87140556	+	0	NA	Intergenic	IAPEz-int|LTR|ERVK	15287	NM_007432	11648	Mm.377076	NM_007432	ENSMUSG00000036500	Akp3	Akp-3|IAP|dIAP	alkaline phosphatase 3, intestine, not Mn requiring	protein-coding
Peaks_397	chr12	104719099	104719349	+	0	NA	intron (NM_148948, intron 8 of 26)	intron (NM_148948, intron 8 of 26)	32728	NM_148948	192119	Mm.21135	NM_148948	ENSMUSG00000041415	Dicer1	1110006F08Rik|D12Ertd7e|mKIAA0928	dicer 1, ribonuclease type III	protein-coding
Peaks_1756	chr11	87710032	87710388	+	0	NA	intron (NM_172448, intron 2 of 9)	intron (NM_172448, intron 2 of 9)	10686	NR_045139	68690	Mm.342009	NR_045139		1110028F11Rik	-	RIKEN cDNA 1110028F11 gene	ncRNA
Peaks_1252	chr5	15690098	15690251	+	0	NA	intron (NR_001585, intron 1 of 4)	intron (NR_001585, intron 1 of 4)	9464	NR_001585	75858	Mm.359463	NR_001585	ENSMUSG00000089871	Speer4cos	4930568L21Rik|SPEER-7|Speer7-ps|Speer7-ps1	spermatogenesis associated glutamate (E)-rich protein 4C, opposite strand transcript	pseudo
Peaks_1568	chr1	3345008	3345278	+	0	NA	intron (NM_001011874, intron 2 of 2)	L1Md_T|LINE|L1	326355	NM_001011874	497097	Mm.454496	NM_001011874	ENSMUSG00000051951	Xkr4	AY534250|Gm210|XRG4|mKIAA1889	X-linked Kx blood group related 4	protein-coding
Peaks_324	chr12	41485857	41486083	+	0	NA	promoter-TSS (NM_001271709)	promoter-TSS (NM_001271709)	87	NM_001271708	16981	Mm.404786	NM_010733	ENSMUSG00000036295	Lrrn3	NLRR-3	leucine rich repeat protein 3, neuronal	protein-coding
Peaks_1	Chr	1	End	+	0	NA	NA	NA	NA	NA
Peaks_588	chr5	96702857	96703476	+	0	NA	intron (NM_175473, intron 41 of 73)	intron (NM_175473, intron 41 of 73)	-90219	NM_013470	11745	Mm.7214	NM_013470	ENSMUSG00000029484	Anxa3	Anx3	annexin A3	protein-coding
Peaks_868	chr1	117091220	117091694	+	0	NA	Intergenic	Lx4A|LINE|L1	1219675	NM_011650	22099	Mm.426637	NM_011650	ENSMUSG00000026374	Tsn	2610034C24Rik|AU040286|C3PO|TB-RBP	translin	protein-coding
Peaks_833	chr10	78221317	78221504	+	0	NA	intron (NM_001081055, intron 4 of 22)	intron (NM_001081055, intron 4 of 22)	23232	NM_001081055	216131	Mm.27539	NM_001081055	ENSMUSG00000000374	Trappc10	B230307C21Rik|Gm870|Tmem1	trafficking protein particle complex 10	protein-coding
Peaks_1561	chr17	33780997	33781515	+	0	NA	exon (NM_020581, exon 1 of 7)	exon (NM_020581, exon 1 of 7)	319	NM_020581	57875	Mm.196189	NM_020581	ENSMUSG00000002289	Angptl4	Arp4|Bk89|Fiaf|Hfarp|Ng27|Pgar|Pgarg|Pp1158	angiopoietin-like 4	protein-coding
Peaks_1540	chr1	8161633	8162112	+	0	NA	Intergenic	IAPEz-int|LTR|ERVK	1072952	NM_183028	319263	Mm.21539	NM_183028	ENSMUSG00000051285	Pcmtd1	8430411F12Rik|A030012M09Rik	protein-L-isoaspartate (D-aspartate) O-methyltransferase domain containing 1	protein-coding
Peaks_1614	chr6	78353047	78353456	+	0	NA	Intergenic	L1Md_T|LINE|L1	-17634	NM_011036	18489	Mm.2553	NM_011036	ENSMUSG00000071356	Reg3b	HIP|PAP1|Pap|REG-III	regenerating islet-derived 3 beta	protein-coding
Peaks_1123	chr1	65815748	65816083	+	0	NA	Intergenic	IAPEz-int|LTR|ERVK	-110607	NM_027010	12969	Mm.275362	NM_027010	ENSMUSG00000025945	Crygf	3110001K11Rik|Cryg-2|DGcry-2|Len-2	crystallin, gamma F	protein-coding
Peaks_448	chrX	101696134	101696375	+	0	NA	Intergenic	CpG	37893	NM_009910	12766	Mm.12876	NM_009910	ENSMUSG00000050232	Cxcr3	Cd183|Cmkar3	chemokine (C-X-C motif) receptor 3	protein-coding
Peaks_931	chr1	58112912	58113118	+	0	NA	promoter-TSS (NM_023617)	promoter-TSS (NM_023617)	-121	NM_023617	71724	Mm.20108	NM_023617	ENSMUSG00000064294	Aox3	1200011D03Rik|AI326299|Aoh1|Aoh2	aldehyde oxidase 3	protein-coding
Peaks_1223	chr1	144678976	144679266	+	0	NA	Intergenic	MERVL-int|LTR|ERVL	96300	NM_022881	64214	Mm.253927	NM_022881	ENSMUSG00000026357	Rgs18	-	regulator of G-protein signaling 18	protein-coding
Peaks_1061	chr8	19979882	19980601	+	0	NA	intron (NM_001270553, intron 6 of 9)	CpG	250665	NM_001039553	626415	Mm.425517	NM_001039553	ENSMUSG00000096265	4930467E23Rik	ENSMUSG00000074453|OTTMUSG00000018948|TSAP	RIKEN cDNA 4930467E23 gene	protein-coding
Peaks_550	chr1	38707316	38707539	+	0	NA	Intergenic	IAPEz-int|LTR|ERVK	-80183	NM_001290814	16764	Mm.336679	NM_010678	ENSMUSG00000037138	Aff3	3222402O04Rik|A730046J16|LAF-4|Laf4	AF4/FMR2 family, member 3	protein-coding
Peaks_228	chr1	34917406	34917508	+	0	NA	Intergenic	IAPEz-int|LTR|ERVK	67498	NM_145516	226971	Mm.292751	NM_145516	ENSMUSG00000026123	Plekhb2	2310009M15Rik|AU018239|Evt2|Phdc|evt-2	pleckstrin homology domain containing, family B (evectins) member 2	protein-coding
Peaks_1810	chr2	166830691	166830988	+	0	NA	intron (NM_001085495, intron 3 of 38)	intron (NM_001085495, intron 3 of 38)	25258	NM_001085495	99371	Mm.297192	NM_001085495	ENSMUSG00000074582	Arfgef2	AI463430|AW493672|BIG2|E230011G24Rik	ADP-ribosylation factor guanine nucleotide-exchange factor 2 (brefeldin A-inhibited)	protein-coding
Peaks_1486	chr3	73251951	73252062	+	0	NA	intron (NR_040557, intron 2 of 4)	MT2_Mm|LTR|ERVL	185655	NR_040557	626082	Mm.428099	NR_040557	ENSMUSG00000103428	Gm20754	-	predicted gene, 20754	ncRNA
Peaks_412	chr3	92211426	92212149	+	0	NA	Intergenic	RLTR1F_Mm|LTR|ERVK	-4048	NM_001164787	100303744	Mm.429851	NM_001164787	ENSMUSG00000068893	Sprr2a2	-	small proline-rich protein 2A2	protein-coding
Peaks_1172	chr4	156059811	156060041	+	0	NA	promoter-TSS (NR_132444)	promoter-TSS (NR_132444)	-124	NR_132444	100415901	Mm.437006	NR_132444	ENSMUSG00000086549	Gm13648	OTTMUSG00000013217	predicted gene 13648	ncRNA
Peaks_1588	chr1	141040187	141040797	+	0	NA	Intergenic	IAPEz-int|LTR|ERVK	-384090	NR_040604	75910	Mm.483845	NR_040604	ENSMUSG00000102368	4930590L20Rik	-	RIKEN cDNA 4930590L20 gene	ncRNA
Peaks_719	chr1	6009050	6009469	+	0	NA	Intergenic	RLTRETN_Mm|LTR|ERVK	-91861	NM_010342	226304	Mm.291110	NM_010342	ENSMUSG00000033774	Npbwr1	Gpr7|Nbpwr1	neuropeptides B/W receptor 1	protein-coding
Peaks_1553	chr1	105389206	105390323	+	0	NA	Intergenic	MTA_Mm-int|LTR|ERVL-MaLR	-33054	NM_001160368	320311	Mm.389162	NM_178779	ENSMUSG00000047496	Rnf152	A930029B02Rik	ring finger protein 152	protein-coding
Peaks_1581	chr16	33829385	33830339	+	0	NA	5' UTR (NM_001145884, exon 1 of 15)	5' UTR (NM_001145884, exon 1 of 15)	197	NM_001145884	16419	Mm.6424	NM_010580	ENSMUSG00000022817	Itgb5	AA475909|AI874634|ESTM23|[b]-5|[b]5|[b]5A|[b]5B|beta-5|beta5	integrin beta 5	protein-coding
Peaks_742	chr1	5552726	5552961	+	0	NA	Intergenic	L1Md_A|LINE|L1	-35650	NM_011011	18387	Mm.7977	NM_011011	ENSMUSG00000025905	Oprk1	K-OR-1|KOR|KOR-1|MSL-1|Oprk2|R21	opioid receptor, kappa 1	protein-coding
Peaks_279	chr14	5444674	5444972	+	0	NA	intron (NM_001291094, intron 1 of 4).2	intron (NM_001291094, intron 1 of 4).2	4216	NM_001291093	100041515	Mm.443041	NM_001205306	ENSMUSG00000096629	Gm3383	ENSMUSG00000079376	predicted gene 3383	protein-coding
Peaks_1729	chr16	32489785	32490098	+	0	NA	Intergenic	(TAGTG)n|Simple_repeat|Simple_repeat	-2062	NM_145932	106407	Mm.476915	NM_145932	ENSMUSG00000035699	Slc51a	AV001382|AW261577|D630035O19Rik|OSTalpha|Osta	solute carrier family 51, alpha subunit	protein-coding
Peaks_1814	chr12	102134807	102135218	+	0	NA	intron (NM_172152, intron 2 of 16)	intron (NM_172152, intron 2 of 16)	5593	NM_172152	238384	Mm.312448	NM_172152	ENSMUSG00000041771	Slc24a4	A930002M03Rik|AW492432|NCKX4	solute carrier family 24 (sodium/potassium/calcium exchanger), member 4	protein-coding
Peaks_1508	chr3	28262543	28263622	+	0	NA	promoter-TSS (NM_001163009)	promoter-TSS (NM_001163009)	-132	NM_001163007	665113	Mm.126193	NM_026910	ENSMUSG00000027692	Tnik	1500031A17Rik|4831440I19Rik|AI451411|C530008O15Rik|C630040K21Rik	TRAF2 and NCK interacting kinase	protein-coding
Peaks_272	chr1	26009540	26009675	+	0	NA	Intergenic	L1Md_F2|LINE|L1	-179900	NM_175642	210933	Mm.336569	NM_175642	ENSMUSG00000033569	Adgrb3	A830096D10Rik|Bai3	adhesion G protein-coupled receptor B3	protein-coding
Peaks_678	chr13	107858240	107858490	+	0	NA	intron (NM_145456, intron 2 of 14)	intron (NM_145456, intron 2 of 14)	31699	NM_145456	67263	Mm.490418	NM_145456	ENSMUSG00000032846	Zswim6	2900036G02Rik|mKIAA1577	zinc finger SWIM-type containing 6	protein-coding
Peaks_787	chr15	11836016	11836312	+	0	NA	Intergenic	Intergenic	69510	NM_008728	18162	Mm.25259	NM_008728	ENSMUSG00000022206	Npr3	ANP-C|ANPR-C|EF-2|NPR-C|lgj|stri	natriuretic peptide receptor 3	protein-coding
Peaks_62	chr1	5252011	5252769	+	0	NA	Intergenic	MERVL-int|LTR|ERVL	169304	NM_001310442	108664	Mm.27082	NM_133826	ENSMUSG00000033793	Atp6v1h	0710001F19Rik|AU022349|CGI-11|SFD|SFDalpha|SFDbeta|VMA13	ATPase, H+ transporting, lysosomal V1 subunit H	protein-coding
Peaks_1526	chr14	103550597	103550859	+	0	NA	intron (NM_022886, intron 8 of 30)	LTR55|LTR|ERVL?	37387	NM_022886	64929	Mm.244003	NM_022886	ENSMUSG00000022123	Scel	9230114I02Rik	sciellin	protein-coding
Peaks_533	chr1	10976584	10977194	+	0	NA	Intergenic	MERVL-int|LTR|ERVL	-16576	NM_029525	109294	Mm.123247	NM_029525	ENSMUSG00000048960	Prex2	6230420N16Rik|AI316880|AI553603|C030045D06Rik|D430013K02|Depdc2|P-Rex2	phosphatidylinositol-3,4,5-trisphosphate-dependent Rac exchange factor 2	protein-coding
Peaks_1255	chr3	116507664	116508357	+	0	NA	5' UTR (NM_025517, exon 1 of 11)	5' UTR (NM_025517, exon 1 of 11)	165	NM_025517	66368	Mm.251228	NM_025517	ENSMUSG00000000339	Rtca	2310009A18Rik|AI450277|RPC|Rtcd1	RNA 3'-terminal phosphate cyclase	protein-coding
Peaks_693	chr14	11046191	11046895	+	0	NA	intron (NM_001308285, intron 2 of 9)	intron (NM_001308285, intron 2 of 9)	115492	NM_010210	14198	Mm.397619	NM_010210	ENSMUSG00000060579	Fhit	AW045638|Fra14A2	fragile histidine triad gene	protein-coding
Peaks_1332	chr12	116248164	116248710	+	0	NA	intron (NM_146039, intron 4 of 21)	intron (NM_146039, intron 4 of 21)	14588	NM_146039	217935	Mm.31382	NM_146039	ENSMUSG00000042050	Wdr60	D430033N04Rik	WD repeat domain 60	protein-coding
Peaks_1501	chr1	35792300	35792479	+	0	NA	Intergenic	IAPEz-int|LTR|ERVK	-276011	NM_015818	50785	Mm.213566	NM_015818	ENSMUSG00000045216	Hs6st1	6Ost1	heparan sulfate 6-O-sulfotransferase 1	protein-coding
Peaks_1360	chr6	98949918	98950156	+	0	NA	intron (NM_001347345, intron 13 of 19)	intron (NM_001347345, intron 13 of 19)	78261	NM_001197322	108655	Mm.234965	NM_053202	ENSMUSG00000030067	Foxp1	3110052D19Rik|4932443N09Rik|AI461938|AW494214	forkhead box P1	protein-coding
Peaks_1441	chr1	151326906	151327548	+	0	NA	Intergenic	RLTR4_Mm|LTR|ERV1	-17271	NM_001039512	117198	Mm.33764	NM_028582	ENSMUSG00000023150	Ivns1abp	1190004M08Rik|1700126I16Rik|AA960440|HSPC068|ND1|NS-1|NS1-BP|Nd1-L|Nd1-S|mKIAA0850	influenza virus NS1A binding protein	protein-coding
Peaks_1408	chr2	156968056	156968364	+	0	NA	intron (NM_013865, intron 2 of 15)	MTE2a|LTR|ERVL-MaLR	23901	NM_013865	29812	Mm.279256	NM_013865	ENSMUSG00000027634	Ndrg3	4833415O14Rik|AI747193|Ndr3	N-myc downstream regulated gene 3	protein-coding
Peaks_1426	chr14	76010487	76011170	+	0	NA	promoter-TSS (NM_026816)	promoter-TSS (NM_026816)	37	NM_026816	68705	Mm.20415	NM_026816	ENSMUSG00000067995	Gtf2f2	1110031C13Rik|AI326315	general transcription factor IIF, polypeptide 2	protein-coding
Peaks_173	chr1	58329225	58329521	+	0	NA	intron (NM_001008419, intron 20 of 35)	IAPEz-int|LTR|ERVK	51047	NM_001008419	213043	Mm.414292	NM_001008419	ENSMUSG00000079554	Aox2	Aoh3|Aox3l1	aldehyde oxidase 2	protein-coding
Peaks_611	chr1	21114933	21116167	+	0	NA	Intergenic	MMERVK10C-int|LTR|ERVK	-36325	NM_177409	170829	Mm.185680	NM_177409	ENSMUSG00000041779	Tram2	C330003D03Rik	translocating chain-associating membrane protein 2	protein-coding
Peaks_40	chr13	116025986	116026164	+	0	NA	Intergenic	L3|LINE|CR1	283613	NM_021459	16392	Mm.42242	NM_021459	ENSMUSG00000042258	Isl1	-	ISL1 transcription factor, LIM/homeodomain	protein-coding
Peaks_632	chr16	96074313	96074585	+	0	NA	intron (NM_001103179, intron 4 of 40)	B1_Mus1|SINE|Alu	7979	NM_001103179	93871	Mm.240871	NM_145125	ENSMUSG00000022914	Brwd1	5330419I02Rik|D530019K20Rik|G1-403-16|Wdr9|repro5	bromodomain and WD repeat domain containing 1	protein-coding
Peaks_130	chr7	95688473	95689015	+	0	NA	Intergenic	(GAAA)n|Simple_repeat|Simple_repeat	-482500	NM_001310762	23966	Mm.254610	NM_011858	ENSMUSG00000048078	Tenm4	Doc4|ELM2|Odz4|R75022|Ten-m4|l(7)-3Rn|l7Rn3|mKIAA1302	teneurin transmembrane protein 4	protein-coding
Peaks_128	chr9	37092992	37093605	+	0	NA	intron (NM_148950, intron 1 of 11)	intron (NM_148950, intron 1 of 11)	54024	NM_148950	208076	Mm.260335	NM_148950	ENSMUSG00000035934	Pknox2	D230005H23Rik|Prep2	Pbx/knotted 1 homeobox 2	protein-coding
Peaks_445	chr1	45735065	45735723	+	0	NA	Intergenic	IAPEz-int|LTR|ERVK	-60107	NM_028599	73674	Mm.270376	NM_028599	ENSMUSG00000025995	Wdr75	1300003A18Rik|2410118I19Rik|C77608	WD repeat domain 75	protein-coding
Peaks_1816	chr5	108427231	108427512	+	0	NA	intron (NM_008806, intron 15 of 21)	intron (NM_008806, intron 15 of 21)	7007	NM_007507	11958	Mm.136093	NM_007507	ENSMUSG00000050856	Atp5k	2610008D24Rik|Atp5i|Lfm1	ATP synthase, H+ transporting, mitochondrial F1F0 complex, subunit E	protein-coding
Peaks_33	chr1	11618660	11619300	+	0	NA	intron (NM_001310451, intron 7 of 12)	L1Md_T|LINE|L1	204875	NM_001160371	320492	Mm.52021	NM_177173	ENSMUSG00000057715	A830018L16Rik	-	RIKEN cDNA A830018L16 gene	protein-coding
Peaks_4	chr1	24612864	24616108	+	0	NA	Intergenic	Intergenic	-27049	NM_007733	12823	Mm.329196	NM_007733	ENSMUSG00000026141	Col19a1	-	collagen, type XIX, alpha 1	protein-coding
Peaks_1199	chr1	7949037	7949391	+	0	NA	Intergenic	ETnERV-int|LTR|ERVK	860294	NM_183028	319263	Mm.21539	NM_183028	ENSMUSG00000051285	Pcmtd1	8430411F12Rik|A030012M09Rik	protein-L-isoaspartate (D-aspartate) O-methyltransferase domain containing 1	protein-coding
Peaks_293	chr1	6430791	6431020	+	0	NA	Intergenic	IAPEz-int|LTR|ERVK	-56326	NM_001244693	240690	Mm.234612	NM_173868	ENSMUSG00000033740	St18	AV348974|Myt3|NZF-3|Nzf3|mKIAA0535	suppression of tumorigenicity 18	protein-coding
Peaks_331	chr1	4562260	4562708	+	0	NA	Intergenic	L1Md_T|LINE|L1	-65130	NM_001289465	20671	Mm.279103	NM_011441	ENSMUSG00000025902	Sox17	-	SRY (sex determining region Y)-box 17	protein-coding
Peaks_512	chr14	103354624	103355171	+	0	NA	Intergenic	LTR33|LTR|ERVL	-8097	NM_207215	105689	Mm.6478	NM_207215	ENSMUSG00000033004	Mycbp2	AU023734|AW107953|AW546647|C130061D10Rik|Pam|Phr1|R75243	MYC binding protein 2	protein-coding
Peaks_906	chr1	58324650	58325334	+	0	NA	intron (NM_001008419, intron 20 of 35)	IAPEz-int|LTR|ERVK	46666	NM_001008419	213043	Mm.414292	NM_001008419	ENSMUSG00000079554	Aox2	Aoh3|Aox3l1	aldehyde oxidase 2	protein-coding
Peaks_997	chr1	65541697	65542153	+	0	NA	Intergenic	RLTR10-int|LTR|ERVK	230668	NM_139270	213527	Mm.294225	NM_139270	ENSMUSG00000025946	Pth2r	Pthr2	parathyroid hormone 2 receptor	protein-coding
Peaks_1103	chr1	9048699	9049103	+	0	NA	intron (NM_027671, intron 2 of 20)	L1Md_A|LINE|L1	250976	NM_001290390	71096	Mm.336395	NM_027671	ENSMUSG00000025909	Sntg1	4933426D16Rik|G1SYN|SYN4	syntrophin, gamma 1	protein-coding
Peaks_1272	chr18	39178663	39179060	+	0	NA	intron (NM_175164, intron 11 of 22)	intron (NM_175164, intron 11 of 22)	185716	NM_175164	71302	Mm.329396	NM_175164	ENSMUSG00000036452	Arhgap26	1810044B20Rik|2610010G17Rik|4933432P15Rik|AI853435|mKIAA0621	Rho GTPase activating protein 26	protein-coding
Peaks_1082	chr1	136808353	136808872	+	0	NA	Intergenic	IAPEz-int|LTR|ERVK	112401	NR_037986	100503474	Mm.428276	NR_037986		Platr22	Gm16880	pluripotency associated transcript 22	ncRNA
Peaks_971	chr7	107691536	107692026	+	0	NA	intron (NM_001163557, intron 5 of 25)	intron (NM_001163557, intron 5 of 25)	66251	NM_001205227	320635	Mm.132828	NM_177216	ENSMUSG00000048065	Cyb5r2	D630003K02Rik|b5R.2	cytochrome b5 reductase 2	protein-coding
Peaks_499	chr10	130279988	130280500	+	0	NA	promoter-TSS (NM_001329490)	promoter-TSS (NM_001329490)	10	NM_001329490	11923	Mm.10695	NM_007501	ENSMUSG00000048015	Neurod4	AI846749|ATH-3|Atoh3|MATH-3|Math3|bHLHa4	neurogenic differentiation 4	protein-coding
Peaks_348	chr7	36658403	36658669	+	0	NA	Intergenic	Intergenic	-39582	NM_172298	243931	Mm.44141	NM_172298	ENSMUSG00000021217	Tshz3	A630038G13Rik|Tsh3|Zfp537|mKIAA1474|teashirt3	teashirt zinc finger family member 3	protein-coding
Peaks_470	chr1	16738710	16738900	+	0	NA	Intergenic	IAPEz-int|LTR|ERVK	50349	NM_016923	17087	Mm.116844	NM_016923	ENSMUSG00000025779	Ly96	ESOP-1|MD-2|MD2	lymphocyte antigen 96	protein-coding
Peaks_1352	chr1	36034148	36034313	+	0	NA	Intergenic	MERVL-int|LTR|ERVL	-34170	NM_015818	50785	Mm.213566	NM_015818	ENSMUSG00000045216	Hs6st1	6Ost1	heparan sulfate 6-O-sulfotransferase 1	protein-coding
Peaks_809	chr1	38654137	38654382	+	0	NA	Intergenic	RLTR10|LTR|ERVK	-27015	NM_001290814	16764	Mm.336679	NM_010678	ENSMUSG00000037138	Aff3	3222402O04Rik|A730046J16|LAF-4|Laf4	AF4/FMR2 family, member 3	protein-coding
Peaks_277	chr1	13211568	13211991	+	0	NA	intron (NM_001302702, intron 4 of 21)	MERVL-int|LTR|ERVL	-84616	NM_001081209	383491	Mm.309380	NM_001081209	ENSMUSG00000042414	Prdm14	-	PR domain containing 14	protein-coding
Peaks_158	chr1	54893669	54894555	+	0	NA	intron (NM_001081433, intron 1 of 27)	MERVL-int|LTR|ERVL	32275	NM_001081433	329154	Mm.397910	NM_001081433	ENSMUSG00000052331	Ankrd44	4930444A19Rik|A130096K20|E130014H08Rik|PP6-ARS-B	ankyrin repeat domain 44	protein-coding
Peaks_374	chr6	121299951	121300424	+	0	NA	promoter-TSS (NM_144512)	promoter-TSS (NM_144512)	-109	NM_144512	14412	Mm.258596	NM_144512	ENSMUSG00000030108	Slc6a13	GAT3|Gabt3|Gat2	solute carrier family 6 (neurotransmitter transporter, GABA), member 13	protein-coding
Peaks_1858	chr7	105952493	105952715	+	0	NA	intron (NM_029000, intron 1 of 3)	RSINE1|SINE|B4	1363	NM_001243040	100042856	Mm.425473	NM_001243039	ENSMUSG00000078606	Gm4070	VLIG-1	predicted gene 4070	protein-coding
Peaks_469	chr14	58029249	58029826	+	0	NA	Intergenic	Intergenic	-30275	NM_028643	68514	Mm.26834	NM_028643	ENSMUSG00000021973	Micu2	1110008L20Rik|4833427E09Rik|AU041871|Efha1|Smhs2	mitochondrial calcium uptake 2	protein-coding
Peaks_248	chr1	85139883	85140289	+	0	NA	Intergenic	RLTR6-int|LTR|ERV1	-30233	NM_213615	381287	Mm.487565	NM_213615	ENSMUSG00000089844	A530032D15Rik	Gm1888	RIKEN cDNA A530032D15Rik gene	protein-coding
Peaks_645	chr16	50380203	50380591	+	0	NA	intron (NM_001347240, intron 2 of 16)	intron (NM_001347240, intron 2 of 16)	51992	NM_027444	70508	Mm.28940	NM_027444	ENSMUSG00000022641	Bbx	5530401J07Rik|5730403O13Rik	bobby sox HMG box containing	protein-coding
Peaks_539	chr1	41090678	41090779	+	0	NA	Intergenic	IAPLTR2_Mm|LTR|ERVK	90524	NR_040475	74897	Mm.243822	NR_040475	ENSMUSG00000104072	4930448I06Rik	-	RIKEN cDNA 4930448I06 gene	ncRNA
Peaks_317	chr1	11259883	11260088	+	0	NA	intron (NM_029525, intron 35 of 39)	MERVL-int|LTR|ERVL	-3978	NM_001033636	109294	Mm.123247	NM_029525	ENSMUSG00000048960	Prex2	6230420N16Rik|AI316880|AI553603|C030045D06Rik|D430013K02|Depdc2|P-Rex2	phosphatidylinositol-3,4,5-trisphosphate-dependent Rac exchange factor 2	protein-coding
Peaks_811	chr7	141040871	141041298	+	0	NA	Intergenic	Intergenic	-20190	NM_177897	330671	Mm.133741	NM_177897	ENSMUSG00000055629	B4galnt4	BC038881|Gm1095|beta4GalNAcT4	beta-1,4-N-acetyl-galactosaminyl transferase 4	protein-coding
Peaks_928	chr15	88575944	88576196	+	0	NA	Intergenic	Intergenic	-24232	NM_027306	70073	Mm.45306	NM_027306	ENSMUSG00000054117	Zdhhc25	1700030J15Rik	zinc finger, DHHC domain containing 25	protein-coding
Peaks_1510	chr1	6326113	6326283	+	0	NA	Intergenic	MTA_Mm-int|LTR|ERVL-MaLR	-33133	NM_001195732	620393	Mm.388992	NM_001195732	ENSMUSG00000087247	Fam150a	EG620393	family with sequence similarity 150, member A	protein-coding
Peaks_1443	chr15	100165077	100165503	+	0	NA	intron (NM_001159361, intron 12 of 37)	intron (NM_001159361, intron 12 of 37)	10894	NM_172819	239667	Mm.243658	NM_172819	ENSMUSG00000023026	Dip2b	4932422C22|AI317237|AI854602|mKIAA1463	disco interacting protein 2 homolog B	protein-coding
Peaks_953	chr3	78966864	78967219	+	0	NA	Intergenic	CpG	177846	NM_001310536	76089	Mm.31220	NM_001099624	ENSMUSG00000062232	Rapgef2	5830453M24Rik|CNRasGEF|Pdzgef1|RA-GEF-1|mKIAA0313|nRapGEP	Rap guanine nucleotide exchange factor (GEF) 2	protein-coding
Peaks_1774	chr1	52590165	52590477	+	0	NA	Intergenic	IAPLTR2_Mm|LTR|ERVK	-40384	NR_024590	227094	Mm.83541	NM_172654	ENSMUSG00000043015	Nemp2	5330401P04Rik|9830163O08|Tmem194b	nuclear envelope integral membrane protein 2	protein-coding
Peaks_1602	chr5	14918693	14919241	+	0	NA	Intergenic	ORR1A1-int|LTR|ERVL-MaLR	-4078	NM_198666	381714	Mm.368256	NM_198666	ENSMUSG00000033219	Gm9758	ENSMUSG00000033219	predicted gene 9758	protein-coding
Peaks_1647	chr1	105610897	105611086	+	0	NA	intron (NM_013784, intron 14 of 30)	MERVL-int|LTR|ERVL	52685	NM_013784	27392	Mm.268911	NM_013784	ENSMUSG00000056536	Pign	Gm20308|PIG-N	phosphatidylinositol glycan anchor biosynthesis, class N	protein-coding
Peaks_1378	chr1	14395542	14396014	+	0	NA	Intergenic	L1Md_T|LINE|L1	-85579	NM_010164	14048	Mm.250185	NM_010164	ENSMUSG00000025932	Eya1	bor	EYA transcriptional coactivator and phosphatase 1	protein-coding
Peaks_1475	chr1	23663459	23663574	+	0	NA	Intergenic	L1Md_A|LINE|L1	-98410	NM_172124	280645	Mm.471661	NM_172124	ENSMUSG00000026156	B3gat2	GlcAT-S|Glcats	beta-1,3-glucuronyltransferase 2 (glucuronosyltransferase S)	protein-coding
Peaks_235	chr16	91334331	91334853	+	0	NA	Intergenic	Intergenic	-38191	NM_010509	15976	Mm.6834	NM_010509	ENSMUSG00000022971	Ifnar2	AI747302|Ifnar-2	interferon (alpha and beta) receptor 2	protein-coding
Peaks_945	chr8	47003170	47003431	+	0	NA	intron (NM_177304, intron 1 of 7)	intron (NM_177304, intron 1 of 7)	16413	NM_177304	320981	Mm.211429	NM_177304	ENSMUSG00000038173	Enpp6	4833421B01Rik|B830047L21Rik|D8Ertd514e|E-NPP 6|GPC-Cpde|Npp6	ectonucleotide pyrophosphatase/phosphodiesterase 6	protein-coding
Peaks_1044	chr8	20275833	20276195	+	0	NA	intron (NR_030708, intron 3 of 4)	L1_Mus2|LINE|L1	21418	NR_030708	547150	Mm.359054	NR_030708	ENSMUSG00000071796	6820431F20Rik	-	cadherin 11 pseudogene	pseudo
Peaks_1412	chr1	29948079	29948263	+	0	NA	Intergenic	IAPEz-int|LTR|ERVK	526683	NR_105760	102465174		NR_105760	ENSMUSG00000099257	Mir6342	Gm27268|mmu-mir-6342	microRNA 6342	ncRNA
Peaks_609	chr13	21396111	21396442	+	0	NA	TTS (NR_105907)	TTS (NR_105907)	362	NR_105907	102465568		NR_105907	ENSMUSG00000098790	Mir6942	Gm27287|mmu-mir-6942	microRNA 6942	ncRNA
Peaks_336	chr8	20267586	20267842	+	0	NA	TTS (NR_030708)	TTS (NR_030708)	29718	NR_030708	547150	Mm.359054	NR_030708	ENSMUSG00000071796	6820431F20Rik	-	cadherin 11 pseudogene	pseudo
Peaks_623	chr1	13552520	13553920	+	0	NA	Intergenic	IAPEz-int|LTR|ERVK	36690	NM_028173	72265	Mm.28765	NM_028173	ENSMUSG00000025935	Tram1	1810049E02Rik|TRAMP	translocating chain-associating membrane protein 1	protein-coding
Peaks_1235	chr1	64961472	64961938	+	0	NA	Intergenic	IAPEz-int|LTR|ERVK	-4881	NM_001039493	241075	Mm.239534	NM_175509	ENSMUSG00000051344	Plekhm3	9430067K14Rik|A230102O09Rik|AI449570|DAPR|Plekhm1l	pleckstrin homology domain containing, family M, member 3	protein-coding
Peaks_1467	chr1	115510653	115510882	+	0	NA	Intergenic	MT-int|LTR|ERVL-MaLR	-174370	NM_001077425	636808	Mm.101576	NM_001077425	ENSMUSG00000070695	Cntnap5a	Caspr5-1|EG636808	contactin associated protein-like 5A	protein-coding
Peaks_1095	chr8	24359054	24359606	+	0	NA	Intergenic	Intergenic	79616	NM_026931	69068	Mm.25775	NM_026931	ENSMUSG00000056313	1810011O10Rik	1110065B09Rik|AW121743|AW321058	RIKEN cDNA 1810011O10 gene	protein-coding
Peaks_1463	chr8	27073516	27073845	+	0	NA	Intergenic	(TG)n|Simple_repeat|Simple_repeat	-12161	NM_054044	78560	Mm.87046	NM_054044	ENSMUSG00000031486	Adgra2	8430414O08Rik|9530074E10Rik|Gpr124|Tem5|mKIAA1531	adhesion G protein-coupled receptor A2	protein-coding
Peaks_1791	chr11	107954670	107955023	+	0	NA	intron (NM_011101, intron 14 of 16)	intron (NM_011101, intron 14 of 16)	-39791	NM_001199301	140723	Mm.87663	NM_080644	ENSMUSG00000040373	Cacng5	-	calcium channel, voltage-dependent, gamma subunit 5	protein-coding
Peaks_1598	chr2	68550246	68550491	+	0	NA	Intergenic	RLTR6-int|LTR|ERV1	-32045	NM_177651	227998	Mm.67562	NM_177651	ENSMUSG00000053896	4933409G03Rik	-	RIKEN cDNA 4933409G03 gene	protein-coding
Peaks_212	chr1	20126679	20127304	+	0	NA	intron (NM_153179, intron 60 of 66)	MT-int|LTR|ERVL-MaLR	-229463	NR_045734	75028	Mm.417820	NR_045734	ENSMUSG00000089914	4930486I03Rik	-	RIKEN cDNA 4930486I03 gene	ncRNA
Peaks_54	chr7	14868092	14868261	+	0	NA	Intergenic	Intergenic	208468	NM_001038676	194588	Mm.389816	NM_001038676	ENSMUSG00000055942	Obox7	EG194588|Gm4745	oocyte specific homeobox 7	protein-coding
Peaks_740	chr9	117379971	117380402	+	0	NA	intron (NM_001172121, intron 1 of 14)	intron (NM_001172121, intron 1 of 14)	-127703	NM_001172126	207181	Mm.326411	NM_178660	ENSMUSG00000039607	Rbms3	6720477E09Rik|8430436O14Rik	RNA binding motif, single stranded interacting protein	protein-coding
Peaks_455	chr10	96077446	96077941	+	0	NA	Intergenic	Intergenic	137030	NM_001001932	216238	Mm.210035	NM_001001932	ENSMUSG00000036499	Eea1	A430109M19Rik|B230358H09Rik|ZFYVE2	early endosome antigen 1	protein-coding
Peaks_161	chr6	8755873	8756102	+	0	NA	intron (NM_001252266, intron 1 of 11)	intron (NM_001252266, intron 1 of 11)	2471	NM_001252266	15893	Mm.275683	NM_010492	ENSMUSG00000062995	Ica1	69kDa|ICA69	islet cell autoantigen 1	protein-coding
Peaks_338	chr1	5078569	5078741	+	0	NA	Intergenic	L1Md_F2|LINE|L1	-4431	NM_133826	108664	Mm.27082	NM_133826	ENSMUSG00000033793	Atp6v1h	0710001F19Rik|AU022349|CGI-11|SFD|SFDalpha|SFDbeta|VMA13	ATPase, H+ transporting, lysosomal V1 subunit H	protein-coding
Peaks_1037	chr1	14091368	14091556	+	0	NA	Intergenic	L1Md_T|LINE|L1	218737	NM_001310459	14048	Mm.250185	NM_010164	ENSMUSG00000025932	Eya1	bor	EYA transcriptional coactivator and phosphatase 1	protein-coding
Peaks_1566	chr1	52593310	52593913	+	0	NA	Intergenic	IAPEz-int|LTR|ERVK	-37094	NR_024590	227094	Mm.83541	NM_172654	ENSMUSG00000043015	Nemp2	5330401P04Rik|9830163O08|Tmem194b	nuclear envelope integral membrane protein 2	protein-coding
Peaks_1025	chr4	41877183	41877391	+	0	NA	Intergenic	LTRIS2|LTR|ERV1	-12508	NR_033506	100042539	Mm.418556	NR_033506		Gm3893	-	predicted gene 3893	ncRNA
Peaks_1828	chr11	59531152	59531548	+	0	NA	Intergenic	RMER1A|Other|Other	-11336	NM_145827	216799	Mm.54174	NM_145827	ENSMUSG00000032691	Nlrp3	AGTAVPRL|AII/AVP|Cias1|FCAS|FCU|MWS|Mmig1|NALP3|Pypaf1	NLR family, pyrin domain containing 3	protein-coding
Peaks_10	chr7	15158357	15159254	+	0	NA	Intergenic	L1_Mus3|LINE|L1	-230046	NM_145708	246792	Mm.26391	NM_145708	ENSMUSG00000074369	Obox2	-	oocyte specific homeobox 2	protein-coding
Peaks_1245	chr4	150136873	150137206	+	0	NA	intron (NM_019741, intron 7 of 13)	intron (NM_019741, intron 7 of 13)	-11933	NM_001085529	435818	Mm.359648	NM_001085529	ENSMUSG00000062064	Slc2a7	OTTMUSG00000010396	solute carrier family 2 (facilitated glucose transporter), member 7	protein-coding
Peaks_803	chr1	7931847	7932089	+	0	NA	Intergenic	L1Md_F2|LINE|L1	843048	NM_183028	319263	Mm.21539	NM_183028	ENSMUSG00000051285	Pcmtd1	8430411F12Rik|A030012M09Rik	protein-L-isoaspartate (D-aspartate) O-methyltransferase domain containing 1	protein-coding
Peaks_261	chr1	11887184	11888167	+	0	NA	intron (NM_001310451, intron 10 of 12)	IAPEz-int|LTR|ERVK	473570	NM_001160371	320492	Mm.52021	NM_177173	ENSMUSG00000057715	A830018L16Rik	-	RIKEN cDNA A830018L16 gene	protein-coding
Peaks_915	chr16	93995592	93995820	+	0	NA	intron (NM_019500, intron 1 of 2)	(TG)n|Simple_repeat|Simple_repeat	13131	NM_019500	56173	Mm.328716	NM_019500	ENSMUSG00000047109	Cldn14	AI851731	claudin 14	protein-coding
Peaks_1395	chr2	66123946	66125360	+	0	NA	5' UTR (NM_015736, exon 1 of 11)	5' UTR (NM_015736, exon 1 of 11)	140	NM_015736	14425	Mm.439760	NM_015736	ENSMUSG00000026994	Galnt3	-	UDP-N-acetyl-alpha-D-galactosamine:polypeptide N-acetylgalactosaminyltransferase 3	protein-coding
Peaks_1402	chr7	95489823	95489990	+	0	NA	Intergenic	Intergenic	-681338	NM_001310762	23966	Mm.254610	NM_011858	ENSMUSG00000048078	Tenm4	Doc4|ELM2|Odz4|R75022|Ten-m4|l(7)-3Rn|l7Rn3|mKIAA1302	teneurin transmembrane protein 4	protein-coding
Peaks_142	chr1	6012791	6013175	+	0	NA	Intergenic	MMETn-int|LTR|ERVK	-95585	NM_010342	226304	Mm.291110	NM_010342	ENSMUSG00000033774	Npbwr1	Gpr7|Nbpwr1	neuropeptides B/W receptor 1	protein-coding
Peaks_634	chr1	10889737	10889934	+	0	NA	Intergenic	MT2_Mm|LTR|ERVL	-23961	NR_030645	100124448		NR_030645	ENSMUSG00000076948	Mir467e	Mirn467e	microRNA 467e	ncRNA
Peaks_552	chr13	78936116	78936719	+	0	NA	Intergenic	Intergenic	-737544	NM_010151	13865	Mm.439653	NM_010151	ENSMUSG00000069171	Nr2f1	COUP-TF1|COUP-TFI|COUPTFA|EAR-3|EAR3|Erbal3|SVP44|Tcfcoup1	nuclear receptor subfamily 2, group F, member 1	protein-coding
Peaks_605	chr15	63052434	63053287	+	0	NA	Intergenic	Intergenic	426748	NR_045279	432958	Mm.255105	NR_045279		Gm20740	-	predicted gene, 20740	ncRNA
Peaks_167	chr9	116919723	116920107	+	0	NA	intron (NM_001172122, intron 4 of 13)	intron (NM_001172122, intron 4 of 13)	332568	NM_001172123	207181	Mm.326411	NM_178660	ENSMUSG00000039607	Rbms3	6720477E09Rik|8430436O14Rik	RNA binding motif, single stranded interacting protein	protein-coding
Peaks_96	chr8	61247259	61248020	+	0	NA	intron (NM_021506, intron 2 of 11)	intron (NM_021506, intron 2 of 11)	23468	NM_021506	59009	Mm.27949	NM_021506	ENSMUSG00000031642	Sh3rf1	2200003J05Rik|Posh|R75531|Sh3md2	SH3 domain containing ring finger 1	protein-coding
Peaks_900	chr7	133708704	133709590	+	0	NA	promoter-TSS (NM_025392)	promoter-TSS (NM_025392)	148	NM_009479	22276	Mm.3160	NM_009479	ENSMUSG00000030979	Uros	AI415298|UROIIIS|Uros3	uroporphyrinogen III synthase	protein-coding
Peaks_899	chr1	186871123	186871310	+	0	NA	Intergenic	MERVL-int|LTR|ERVL	-96200	NM_033077	110957	Mm.108054	NM_033077	ENSMUSG00000039224	D1Pas1	Pl10	DNA segment, Chr 1, Pasteur Institute 1	protein-coding
Peaks_1047	chr1	16739392	16740457	+	0	NA	Intergenic	IAPEz-int|LTR|ERVK	51468	NM_016923	17087	Mm.116844	NM_016923	ENSMUSG00000025779	Ly96	ESOP-1|MD-2|MD2	lymphocyte antigen 96	protein-coding
Peaks_560	chr16	93992281	93993466	+	0	NA	intron (NM_019500, intron 1 of 2)	intron (NM_019500, intron 1 of 2)	15964	NM_019500	56173	Mm.328716	NM_019500	ENSMUSG00000047109	Cldn14	AI851731	claudin 14	protein-coding
Peaks_575	chr1	34078516	34079776	+	0	NA	intron (NM_133833, intron 1 of 92)	MERVL-int|LTR|ERVL	-38213	NR_105861	102466987		NR_105861	ENSMUSG00000105982	Mir6896	mmu-mir-6896	microRNA 6896	ncRNA
Peaks_700	chr11	97957143	97957371	+	0	NA	intron (NM_001163608, intron 2 of 13)	intron (NM_001163608, intron 2 of 13)	29189	NM_028199	72324	Mm.39617	NM_028199	ENSMUSG00000017417	Plxdc1	2410003I07Rik|AI848450|Tem7	plexin domain containing 1	protein-coding
Peaks_705	chr2	60809391	60809608	+	0	NA	intron (NM_020296, intron 2 of 13)	intron (NM_020296, intron 2 of 13)	71939	NM_001141932	56878	Mm.259667	NM_020296	ENSMUSG00000026970	Rbms1	2600014B10Rik|AI255215|MSSP-1|MSSP-2|MSSP-3|YC1	RNA binding motif, single stranded interacting protein 1	protein-coding
Peaks_493	chr19	37298712	37298971	+	0	NA	intron (NM_031156, intron 11 of 23)	intron (NM_031156, intron 11 of 23)	31772	NM_031156	15925	Mm.28366	NM_031156	ENSMUSG00000056999	Ide	1300012G03Rik|4833415K22Rik|AA675336|AI507533	insulin degrading enzyme	protein-coding
Peaks_1702	chr1	21997651	21998143	+	0	NA	Intergenic	IAPEz-int|LTR|ERVK	-35247	NM_001310477	226922	Mm.336519	NM_023872	ENSMUSG00000028033	Kcnq5	7730402H11|9230107O05Rik|AA589396|D1Mgi1	potassium voltage-gated channel, subfamily Q, member 5	protein-coding
Peaks_1653	chr2	58282439	58282832	+	0	NA	intron (NM_001033369, intron 5 of 7)	intron (NM_001033369, intron 5 of 7)	5856	NR_040365	100502932	Mm.417207	NR_040365	ENSMUSG00000086995	Gm13544	OTTMUSG00000012672	predicted gene 13544	ncRNA
Peaks_1542	chr1	69699847	69699954	+	0	NA	Intergenic	IAPEz-int|LTR|ERVK	-13940	NM_011770	22779	Mm.106343	NM_011770	ENSMUSG00000025997	Ikzf2	A730095J18Rik|Helios|Zfpn1a2|Znfn1a2	IKAROS family zinc finger 2	protein-coding
Peaks_384	chr1	7997519	7997801	+	0	NA	Intergenic	IAPEz-int|LTR|ERVK	908740	NM_183028	319263	Mm.21539	NM_183028	ENSMUSG00000051285	Pcmtd1	8430411F12Rik|A030012M09Rik	protein-L-isoaspartate (D-aspartate) O-methyltransferase domain containing 1	protein-coding
Peaks_524	chr14	108911180	108912104	+	0	NA	exon (NM_199065, exon 1 of 1)	exon (NM_199065, exon 1 of 1)	2597	NM_199065	76965	Mm.257268	NM_199065	ENSMUSG00000075478	Slitrk1	3200001I04Rik	SLIT and NTRK-like family, member 1	protein-coding
Peaks_889	chr1	76776333	76776926	+	0	NA	Intergenic	IAPEz-int|LTR|ERVK	267069	NR_105761	102465175		NR_105761	ENSMUSG00000098611	Mir6343	Gm27304|mmu-mir-6343	microRNA 6343	ncRNA
Peaks_121	chr14	5461522	5461785	+	0	NA	Intergenic	Intergenic	-6205	NM_001291094	100041515	Mm.443041	NM_001205306	ENSMUSG00000096629	Gm3383	ENSMUSG00000079376	predicted gene 3383	protein-coding
Peaks_224	chr12	119945606	119946770	+	0	NA	5' UTR (NM_001160385, exon 1 of 4)	5' UTR (NM_001160385, exon 1 of 4)	226	NM_001160385	217951	Mm.387395	NM_001160385	ENSMUSG00000048004	Tmem196	Gm528	transmembrane protein 196	protein-coding
Peaks_982	chr5	60231324	60231583	+	0	NA	Intergenic	Intergenic	-245451	NR_040682	71057	Mm.50817	NR_040682	ENSMUSG00000106013	4933402J10Rik	-	RIKEN cDNA 4933402J10 gene	ncRNA
Peaks_1240	chr3	153501588	153501749	+	0	NA	intron (NM_011372, intron 2 of 4)	intron (NM_011372, intron 2 of 4)	-203019	NR_126464	75489	Mm.443252	NR_126464	ENSMUSG00000105023	1700012D16Rik	-	RIKEN cDNA 1700012D16 gene	ncRNA
Peaks_1583	chr10	85413290	85413577	+	0	NA	intron (NM_028709, intron 1 of 16)	intron (NM_028709, intron 1 of 16)	26619	NM_028709	74007	Mm.36544	NM_028709	ENSMUSG00000020042	Btbd11	6330404E16Rik	BTB (POZ) domain containing 11	protein-coding
Peaks_1391	chr7	28139596	28140004	+	0	NA	exon (NM_001164655, exon 5 of 20)	exon (NM_001164655, exon 5 of 20)	10334	NM_001164655	319482	Mm.483194	NM_176924	ENSMUSG00000078776	9530053A07Rik	FCGBP	RIKEN cDNA 9530053A07 gene	protein-coding
Peaks_1865	chrX	74804003	74804226	+	0	NA	Intergenic	Intergenic	-33082	NM_001081670	546325	Mm.436644	NM_001081670	ENSMUSG00000079531	Gm5936	EG546325	predicted gene 5936	protein-coding
Peaks_284	chr10	97479493	97479825	+	0	NA	5' UTR (NM_001190451, exon 1 of 8)	5' UTR (NM_001190451, exon 1 of 8)	159	NM_001190451	13179	Mm.56769	NM_007833	ENSMUSG00000019929	Dcn	DC|DSPG2|PG40|PGII|PGS2|SLRR1B	decorin	protein-coding
Peaks_857	chr1	70237672	70238229	+	0	NA	intron (NM_029160, intron 11 of 16)	IAPEz-int|LTR|ERVK	286335	NM_025728	66722	Mm.440554	NM_025728	ENSMUSG00000053153	Spag16	4921511D23Rik|4930524F24Rik|4930585K05Rik|AV261009|Pf20|Wdr29	sperm associated antigen 16	protein-coding
Peaks_1264	chr7	82771113	82772053	+	0	NA	intron (NM_175317, intron 18 of 19)	intron (NM_175317, intron 18 of 19)	-15939	NR_046004	77800	Mm.444811	NR_046004	ENSMUSG00000086690	4933406J10Rik	A930009F24Rik	RIKEN cDNA 4933406J10 gene	ncRNA
Peaks_1334	chr1	164226139	164226727	+	0	NA	Intergenic	RLTR4_MM-int|LTR|ERV1	-22613	NM_054087	116914	Mm.35444	NM_054087	ENSMUSG00000040918	Slc19a2	AV276020|AW322295|DDA1|THTR1|TRMA	solute carrier family 19 (thiamine transporter), member 2	protein-coding
Peaks_1164	chr5	109690359	109691320	+	0	NA	Intergenic	Intergenic	-131846	NM_001310694	57914	Mm.35771	NM_016715	ENSMUSG00000033467	Crlf2	CRLM2|Ly114|Tpte2|Tslpr	cytokine receptor-like factor 2	protein-coding
Peaks_850	chr1	79943631	79943905	+	0	NA	Intergenic	IAPEz-int|LTR|ERVK	-85103	NM_009255	20720	Mm.3093	NM_009255	ENSMUSG00000026249	Serpine2	B230326M24Rik|PAI-1|PI-7|PI7|PN-1|Spi4	serine (or cysteine) peptidase inhibitor, clade E, member 2	protein-coding
Peaks_257	chr1	10980116	10980647	+	0	NA	Intergenic	MERVL-int|LTR|ERVL	-13084	NM_029525	109294	Mm.123247	NM_029525	ENSMUSG00000048960	Prex2	6230420N16Rik|AI316880|AI553603|C030045D06Rik|D430013K02|Depdc2|P-Rex2	phosphatidylinositol-3,4,5-trisphosphate-dependent Rac exchange factor 2	protein-coding
Peaks_1640	chr17	13550654	13551690	+	0	NA	intron (NR_045436, intron 1 of 4)	(CTGTG)n|Simple_repeat|Simple_repeat	2922	NR_045436	72578	Mm.46549	NR_045436	ENSMUSG00000038347	2700054A10Rik	-	RIKEN cDNA 2700054A10 gene	ncRNA
Peaks_109	chr1	103589176	103589565	+	0	NA	Intergenic	IAPEz-int|LTR|ERVK	-1179449	NM_011800	23836	Mm.103640	NM_011800	ENSMUSG00000050840	Cdh20	Cdh7	cadherin 20	protein-coding
Peaks_1018	chr1	87134564	87134779	+	0	NA	Intergenic	IAPEz-int|LTR|ERVK	9663	NM_007432	11648	Mm.377076	NM_007432	ENSMUSG00000036500	Akp3	Akp-3|IAP|dIAP	alkaline phosphatase 3, intestine, not Mn requiring	protein-coding
Peaks_352	chr1	35317754	35318210	+	0	NA	Intergenic	RLTR10-int|LTR|ERVK	468023	NM_145516	226971	Mm.292751	NM_145516	ENSMUSG00000026123	Plekhb2	2310009M15Rik|AU018239|Evt2|Phdc|evt-2	pleckstrin homology domain containing, family B (evectins) member 2	protein-coding
Peaks_1673	chr13	52980307	52981459	+	0	NA	5' UTR (NM_017373, exon 1 of 2)	5' UTR (NM_017373, exon 1 of 2)	156	NM_017373	18030	Mm.136604	NM_017373	ENSMUSG00000056749	Nfil3	AV225605|E4BP4	nuclear factor, interleukin 3, regulated	protein-coding
Peaks_531	chr1	74659493	74659612	+	0	NA	Intergenic	IAPEz-int|LTR|ERVK	-2202	NM_001014974	67534	Mm.260714	NM_001014974	ENSMUSG00000033257	Ttll4	4632407P03Rik|AI451681|mKIAA0173	tubulin tyrosine ligase-like family, member 4	protein-coding
Peaks_1032	chr1	114039493	114039739	+	0	NA	Intergenic	MTEb|LTR|ERVL-MaLR	-1645521	NM_001077425	636808	Mm.101576	NM_001077425	ENSMUSG00000070695	Cntnap5a	Caspr5-1|EG636808	contactin associated protein-like 5A	protein-coding
Peaks_390	chr1	7196254	7196688	+	0	NA	Intergenic	L1Md_T|LINE|L1	107551	NM_183028	319263	Mm.21539	NM_183028	ENSMUSG00000051285	Pcmtd1	8430411F12Rik|A030012M09Rik	protein-L-isoaspartate (D-aspartate) O-methyltransferase domain containing 1	protein-coding
Peaks_537	chr12	72664000	72664099	+	0	NA	intron (NM_025522, intron 1 of 6)	intron (NM_025522, intron 1 of 6)	779	NM_025522	66375	Mm.289653	NM_025522	ENSMUSG00000021094	Dhrs7	2310016E22Rik|5730564L20Rik|AW061210|Retdsr4|Retsdr4	dehydrogenase/reductase (SDR family) member 7	protein-coding
Peaks_268	chr11	116745628	116746031	+	0	NA	Intergenic	(TG)n|Simple_repeat|Simple_repeat	-6338	NR_003364	193217	Mm.100084	NR_003364		BC018473	-	cDNA sequence BC018473	ncRNA
Peaks_400	chr3	158560976	158562429	+	0	NA	5' UTR (NM_001291453, exon 1 of 26)	5' UTR (NM_001291453, exon 1 of 26)	519	NM_001291453	242274	Mm.132162	NM_001081358	ENSMUSG00000028176	Lrrc7	AK122498|densin|mKIAA1365	leucine rich repeat containing 7	protein-coding
Peaks_231	chr7	46387595	46387982	+	0	NA	Intergenic	RLTR17B_Mm|LTR|ERVK	-8680	NM_008421	16502	Mm.249386	NM_008421	ENSMUSG00000058975	Kcnc1	C230009H10Rik|KShIIIB|KV4|Kcr2-1|Kv3.1|NGK2|Shaw	potassium voltage gated channel, Shaw-related subfamily, member 1	protein-coding
Peaks_389	chr1	6692556	6693500	+	0	NA	intron (NM_001244693, intron 2 of 22)	RLTR10-int|LTR|ERVK	-37023	NR_045189	240690	Mm.234612	NM_173868	ENSMUSG00000033740	St18	AV348974|Myt3|NZF-3|Nzf3|mKIAA0535	suppression of tumorigenicity 18	protein-coding
Peaks_613	chr1	26349260	26351274	+	0	NA	Intergenic	IAPEz-int|LTR|ERVK	337193	NM_001033764	210940	Mm.297614	NM_001033764	ENSMUSG00000073722	4931408C20Rik	-	RIKEN cDNA 4931408C20 gene	protein-coding
Peaks_1182	chr14	29267533	29267878	+	0	NA	intron (NM_009785, intron 11 of 37)	intron (NM_009785, intron 11 of 37)	249497	NM_176920	319476	Mm.95780	NM_176920	ENSMUSG00000045776	Lrtm1	A930016D02Rik	leucine-rich repeats and transmembrane domains 1	protein-coding
Peaks_1293	chr12	116404968	116406054	+	0	NA	promoter-TSS (NR_028421)	promoter-TSS (NR_028421)	109	NM_133762	76044	Mm.491196	NM_133762	ENSMUSG00000042029	Ncapg2	5830426I05Rik|Luzp5|Mtb|mCAP-G2	non-SMC condensin II complex, subunit G2	protein-coding
Peaks_1296	chr1	166138026	166138294	+	0	NA	intron (NM_021610, intron 1 of 6)	intron (NM_021610, intron 1 of 6)	7700	NM_021610	59290	Mm.46357	NM_021610	ENSMUSG00000000544	Gpa33	2010310L10Rik|2210401D16Rik|BB116197	glycoprotein A33 (transmembrane)	protein-coding
Peaks_1798	chr8	78899890	78900261	+	0	NA	Intergenic	Intergenic	-78923	NM_030145	78651	Mm.28694	NM_030145	ENSMUSG00000031683	Lsm6	1500031N17Rik|2410088K19Rik|AI747288	LSM6 homolog, U6 small nuclear RNA and mRNA degradation associated	protein-coding
Peaks_1109	chr1	13736230	13736310	+	0	NA	Intergenic	L1Md_T|LINE|L1	50659	NR_004447	433273	Mm.304088	NR_004447	ENSMUSG00000097711	Gm5523	EG433273	glyceraldehyde-3-phosphate dehydrogenase pseudogene	pseudo
Peaks_1840	chr6	47652743	47652957	+	0	NA	Intergenic	RMER12B|LTR|ERVK	2244	NR_002841	19799		NR_002841		Rn4.5s	-	4.5S RNA	rRNA
Peaks_675	chr1	5921509	5921595	+	0	NA	Intergenic	L1Md_F2|LINE|L1	-4154	NM_010342	226304	Mm.291110	NM_010342	ENSMUSG00000033774	Npbwr1	Gpr7|Nbpwr1	neuropeptides B/W receptor 1	protein-coding
Peaks_144	chr1	7191971	7192147	+	0	NA	Intergenic	L1Md_T|LINE|L1	103139	NM_183028	319263	Mm.21539	NM_183028	ENSMUSG00000051285	Pcmtd1	8430411F12Rik|A030012M09Rik	protein-L-isoaspartate (D-aspartate) O-methyltransferase domain containing 1	protein-coding
Peaks_1189	chr4	119138292	119138572	+	0	NA	Intergenic	Intergenic	29687	NM_011400	20525	Mm.21002	NM_011400	ENSMUSG00000028645	Slc2a1	Glut-1|Glut1	solute carrier family 2 (facilitated glucose transporter), member 1	protein-coding
Peaks_1481	chr6	36387976	36389502	+	0	NA	promoter-TSS (NR_015589)	promoter-TSS (NR_015589)	-505	NR_015589	319472	Mm.226434	NR_015589	ENSMUSG00000073154	9330158H04Rik	-	RIKEN cDNA 9330158H04 gene	ncRNA
Peaks_959	chr1	36031904	36032236	+	0	NA	Intergenic	MERVL-int|LTR|ERVL	-36330	NM_015818	50785	Mm.213566	NM_015818	ENSMUSG00000045216	Hs6st1	6Ost1	heparan sulfate 6-O-sulfotransferase 1	protein-coding
Peaks_1719	chr3	107420219	107420470	+	0	NA	Intergenic	Intergenic	38554	NM_145922	99738	Mm.101976	NM_145922	ENSMUSG00000027895	Kcnc4	AI850292|KSHIIIC|Kcr2-4|Kv3.4	potassium voltage gated channel, Shaw-related subfamily, member 4	protein-coding
Peaks_908	chr8	19929961	19930072	+	0	NA	intron (NM_001270553, intron 6 of 9)	ORR1D1|LTR|ERVL-MaLR	200440	NM_001039553	626415	Mm.425517	NM_001039553	ENSMUSG00000096265	4930467E23Rik	ENSMUSG00000074453|OTTMUSG00000018948|TSAP	RIKEN cDNA 4930467E23 gene	protein-coding
Peaks_17	chr4	156341378	156341951	+	0	NA	Intergenic	Intergenic	10538	NM_009485	22300	Mm.377117	NM_009485		Vmn2r123	V2r1	vomeronasal 2, receptor 123	protein-coding
Peaks_46	chr10	3109356	3110146	+	0	NA	Intergenic	Intergenic	23442	NR_045946	619314	Mm.145928	NR_045946	ENSMUSG00000110909	B020014A21Rik	-	RIKEN cDNA B020014A21 gene	ncRNA
Peaks_320	chr1	10978566	10978829	+	0	NA	Intergenic	MERVL-int|LTR|ERVL	-14768	NM_029525	109294	Mm.123247	NM_029525	ENSMUSG00000048960	Prex2	6230420N16Rik|AI316880|AI553603|C030045D06Rik|D430013K02|Depdc2|P-Rex2	phosphatidylinositol-3,4,5-trisphosphate-dependent Rac exchange factor 2	protein-coding
Peaks_1125	chr1	117702013	117702130	+	0	NA	Intergenic	IAPLTR1a_Mm|LTR|ERVK	609061	NM_011650	22099	Mm.426637	NM_011650	ENSMUSG00000026374	Tsn	2610034C24Rik|AU040286|C3PO|TB-RBP	translin	protein-coding
Peaks_1056	chr1	74653989	74654357	+	0	NA	Intergenic	IAPEz-int|LTR|ERVK	-7581	NM_001014974	67534	Mm.260714	NM_001014974	ENSMUSG00000033257	Ttll4	4632407P03Rik|AI451681|mKIAA0173	tubulin tyrosine ligase-like family, member 4	protein-coding
Peaks_1329	chr7	140967843	140968181	+	0	NA	promoter-TSS (NM_001112715)	promoter-TSS (NM_001112715)	-64	NM_001112715	68713	Mm.175661	NM_026820	ENSMUSG00000025491	Ifitm1	1110036C17Rik|DSPA2a|Mil-2|Mil2	interferon induced transmembrane protein 1	protein-coding
Peaks_60	chr1	29643349	29643582	+	0	NA	Intergenic	MT2_Mm|LTR|ERVL	221977	NR_105760	102465174		NR_105760	ENSMUSG00000099257	Mir6342	Gm27268|mmu-mir-6342	microRNA 6342	ncRNA
Peaks_1785	chr17	62777925	62778376	+	0	NA	intron (NM_010109, intron 1 of 3)	intron (NM_010109, intron 1 of 3)	103167	NM_207654	13640	Mm.7978	NM_010109	ENSMUSG00000048915	Efna5	AL-1|AV158822|EFL-5|Ephrin-A5|Epl7|LERK-7|RAGS	ephrin A5	protein-coding
Peaks_310	chr13	107371708	107372221	+	0	NA	Intergenic	Intergenic	-97858	NR_045083	105120	Mm.417700	NR_045083		AI197445	-	expressed sequence AI197445	ncRNA
Peaks_746	chr1	10730138	10731276	+	0	NA	intron (NR_030645, intron 2 of 3)	IAPEz-int|LTR|ERVK	-10762	NM_177834	329093	Mm.336423	NM_177834	ENSMUSG00000042501	Cpa6	9030616D13Rik	carboxypeptidase A6	protein-coding
Peaks_870	chr1	182257498	182257794	+	0	NA	Intergenic	RLTR4_Mm|LTR|ERV1	25113	NM_007853	13244	Mm.29648	NM_007853	ENSMUSG00000038633	Degs1	AA536663|Degs|Des1|Mdes	delta(4)-desaturase, sphingolipid 1	protein-coding
Peaks_226	chr17	13654559	13654930	+	0	NA	Intergenic	Intergenic	-100650	NR_045437	72578	Mm.46549	NR_045436	ENSMUSG00000038347	2700054A10Rik	-	RIKEN cDNA 2700054A10 gene	ncRNA
Peaks_1217	chr5	38240724	38241105	+	0	NA	Intergenic	Intergenic	-19461	NM_025480	66309	Mm.256185	NM_025480	ENSMUSG00000067365	Tmem128	2810021O14Rik	transmembrane protein 128	protein-coding
Peaks_1288	chr1	7999036	7999377	+	0	NA	Intergenic	IAPEz-int|LTR|ERVK	910286	NM_183028	319263	Mm.21539	NM_183028	ENSMUSG00000051285	Pcmtd1	8430411F12Rik|A030012M09Rik	protein-L-isoaspartate (D-aspartate) O-methyltransferase domain containing 1	protein-coding
Peaks_571	chr10	85413716	85414090	+	0	NA	intron (NM_028709, intron 1 of 16)	intron (NM_028709, intron 1 of 16)	27089	NM_028709	74007	Mm.36544	NM_028709	ENSMUSG00000020042	Btbd11	6330404E16Rik	BTB (POZ) domain containing 11	protein-coding
Peaks_1066	chr17	23535576	23535872	+	0	NA	Intergenic	Intergenic	-15075	NR_126485	320020	Mm.445111	NR_126484		6330415G19Rik	-	RIKEN cDNA 6330415G19 gene	ncRNA
Peaks_1389	chr2	64325556	64325776	+	0	NA	Intergenic	Intergenic	-227628	NM_001267847	60344	Mm.130769	NM_021716	ENSMUSG00000075324	Fign	fi|fidget	fidgetin	protein-coding
Peaks_462	chr1	70240466	70240934	+	0	NA	intron (NM_029160, intron 11 of 16)	IAPEz-int|LTR|ERVK	289085	NM_025728	66722	Mm.440554	NM_025728	ENSMUSG00000053153	Spag16	4921511D23Rik|4930524F24Rik|4930585K05Rik|AV261009|Pf20|Wdr29	sperm associated antigen 16	protein-coding
Peaks_1616	chr17	90696396	90696885	+	0	NA	intron (NM_001346957, intron 6 of 18)	intron (NM_001346957, intron 6 of 18)	96836	NR_136930	102634634		NR_136930		Gm20491	-	enolase 1, alpha non-neuron pseudogene	pseudo
Peaks_796	chr7	59733219	59733696	+	0	NA	Intergenic	Intergenic	-7205	NR_033778	64244		NR_033778	ENSMUSG00000096475	Snord116l1	Pwcr1l1	small nucleolar RNA, C/D box 116-like 1	snoRNA
Peaks_1689	chr1	26353117	26353552	+	0	NA	Intergenic	IAPEz-int|LTR|ERVK	334126	NM_001033764	210940	Mm.297614	NM_001033764	ENSMUSG00000073722	4931408C20Rik	-	RIKEN cDNA 4931408C20 gene	protein-coding
Peaks_1536	chr1	180011939	180012118	+	0	NA	intron (NM_001346805, intron 2 of 34)	MERVL-int|LTR|ERVL	50939	NM_001033285	226751	Mm.259655	NM_001033285	ENSMUSG00000026490	Cdc42bpa	A930014J19Rik|DMPK-like	CDC42 binding protein kinase alpha	protein-coding
Peaks_713	chr1	37279791	37280880	+	0	NA	Intergenic	IAPEz-int|LTR|ERVK	-19503	NM_030266	269180	Mm.5294	NM_030266	ENSMUSG00000026113	Inpp4a	107kDa|9630012D15|D130048C09Rik|R74740	inositol polyphosphate-4-phosphatase, type I	protein-coding
Peaks_113	chr3	150615540	150615810	+	0	NA	Intergenic	RLTR41A2|LTR|ERV1	-822207	NM_133222	170757	Mm.317261	NM_133222	ENSMUSG00000039167	Adgrl4	1110033N21Rik|ETL1|Eltd1|Etl	adhesion G protein-coupled receptor L4	protein-coding
Peaks_896	chr6	123475555	123475724	+	0	NA	Intergenic	Intergenic	-57578	NM_001104634	667180	Mm.469877	NM_001104634	ENSMUSG00000094145	Vmn2r20	EG667180	vomeronasal 2, receptor 20	protein-coding
Peaks_379	chr1	121777333	121777426	+	0	NA	Intergenic	IAPLTR2_Mm|LTR|ERVK	-209399	NM_025860	66942	Mm.44219	NM_025860	ENSMUSG00000001674	Ddx18	2310005B10Rik	DEAD (Asp-Glu-Ala-Asp) box polypeptide 18	protein-coding
Peaks_1524	chr5	141240823	141242068	+	0	NA	promoter-TSS (NM_177879)	promoter-TSS (NM_177879)	-89	NM_177879	330222	Mm.151931	NM_177879	ENSMUSG00000039683	Sdk1	5330440E10|6720466O15Rik	sidekick cell adhesion molecule 1	protein-coding
Peaks_181	chr1	185731028	185731441	+	0	NA	intron (NR_030555, intron 4 of 6)	intron (NR_030555, intron 4 of 6)	193898	NR_030555	100124483		NR_030555	ENSMUSG00000076976	Mir297c	Mirn297c	microRNA 297c	ncRNA
Peaks_1577	chr1	9181452	9181550	+	0	NA	intron (NM_027671, intron 2 of 20)	L1Md_A|LINE|L1	118376	NM_001290390	71096	Mm.336395	NM_027671	ENSMUSG00000025909	Sntg1	4933426D16Rik|G1SYN|SYN4	syntrophin, gamma 1	protein-coding
Peaks_274	chrX	137107648	137108087	+	0	NA	Intergenic	Intergenic	12459	NM_007957	13984	Mm.8017	NM_007957	ENSMUSG00000023443	Esx1	Spx1	extraembryonic, spermatogenesis, homeobox 1	protein-coding
Peaks_1406	chr10	81960960	81961089	+	0	NA	Intergenic	RLTR10-int|LTR|ERVK	-30512	NM_001346707	100040944		NM_001346707		Gm3055	-	predicted gene 3055	protein-coding
Peaks_821	chr1	5488118	5488483	+	0	NA	Intergenic	MERVL_2A-int|LTR|ERVL	-100193	NM_011011	18387	Mm.7977	NM_011011	ENSMUSG00000025905	Oprk1	K-OR-1|KOR|KOR-1|MSL-1|Oprk2|R21	opioid receptor, kappa 1	protein-coding
Peaks_187	chr2	46386807	46387532	+	0	NA	Intergenic	IAPEz-int|LTR|ERVK	690564	NR_040497	69405	Mm.396184	NR_040497	ENSMUSG00000086202	1700019E08Rik	-	RIKEN cDNA 1700019E08 gene	ncRNA
Peaks_771	chr1	8640158	8641295	+	0	NA	intron (NM_027671, intron 10 of 20)	L1Md_T|LINE|L1	659151	NM_001290390	71096	Mm.336395	NM_027671	ENSMUSG00000025909	Sntg1	4933426D16Rik|G1SYN|SYN4	syntrophin, gamma 1	protein-coding
Peaks_1417	chr1	8218131	8219071	+	0	NA	Intergenic	L1Md_A|LINE|L1	1081276	NM_001290390	71096	Mm.336395	NM_027671	ENSMUSG00000025909	Sntg1	4933426D16Rik|G1SYN|SYN4	syntrophin, gamma 1	protein-coding
Peaks_24	chr7	14767851	14768131	+	0	NA	Intergenic	Intergenic	108283	NM_001038676	194588	Mm.389816	NM_001038676	ENSMUSG00000055942	Obox7	EG194588|Gm4745	oocyte specific homeobox 7	protein-coding
Peaks_519	chr1	7190421	7191274	+	0	NA	Intergenic	L1Md_T|LINE|L1	101927	NM_183028	319263	Mm.21539	NM_183028	ENSMUSG00000051285	Pcmtd1	8430411F12Rik|A030012M09Rik	protein-L-isoaspartate (D-aspartate) O-methyltransferase domain containing 1	protein-coding
Peaks_329	chr1	10979256	10979487	+	0	NA	Intergenic	MERVL-int|LTR|ERVL	-14094	NM_029525	109294	Mm.123247	NM_029525	ENSMUSG00000048960	Prex2	6230420N16Rik|AI316880|AI553603|C030045D06Rik|D430013K02|Depdc2|P-Rex2	phosphatidylinositol-3,4,5-trisphosphate-dependent Rac exchange factor 2	protein-coding
Peaks_577	chr1	3347525	3347609	+	0	NA	intron (NM_001011874, intron 2 of 2)	L1Md_T|LINE|L1	323931	NM_001011874	497097	Mm.454496	NM_001011874	ENSMUSG00000051951	Xkr4	AY534250|Gm210|XRG4|mKIAA1889	X-linked Kx blood group related 4	protein-coding
Peaks_286	chr1	112567876	112568816	+	0	NA	Intergenic	IAPEz-int|LTR|ERVK	-703428	NM_001081316	319901	Mm.103468	NM_001081316	ENSMUSG00000038702	Dsel	9330132E09Rik|DS-epi2	dermatan sulfate epimerase-like	protein-coding
Peaks_1836	chr13	48662467	48663430	+	0	NA	promoter-TSS (NM_007526)	promoter-TSS (NM_007526)	-88	NM_007526	12022	Mm.42241	NM_007526	ENSMUSG00000021381	Barx1	-	BarH-like homeobox 1	protein-coding
Peaks_595	chr5	99643280	99643470	+	0	NA	intron (NR_030692, intron 1 of 3)	intron (NR_030692, intron 1 of 3)	85685	NR_030692	319818	Mm.295233	NR_030692	ENSMUSG00000089809	A930011G23Rik	-	RIKEN cDNA A930011G23 gene	ncRNA
Peaks_256	chr10	112072824	112073041	+	0	NA	intron (NM_027018, intron 3 of 4)	RLTR18B|LTR|ERVK	-10422	NM_001347157	67537	Mm.292351	NM_026223	ENSMUSG00000020214	Glipr1l2	4921508O11Rik	GLI pathogenesis-related 1 like 2	protein-coding
Peaks_975	chr1	4132230	4132513	+	0	NA	Intergenic	IAPLTR1a_Mm|LTR|ERVK	227943	NM_011283	19888	Mm.294263	NM_011283	ENSMUSG00000025900	Rp1	Dcdc3|Orp1|Rp1h|mG145	retinitis pigmentosa 1 (human)	protein-coding
Peaks_1063	chr1	83511559	83511728	+	0	NA	Intergenic	L1Md_T|LINE|L1	-103443	NM_172430	77629	Mm.154303	NM_172430	ENSMUSG00000026163	Sphkap	4930544G21Rik|A930009L15Rik|AI852220|SKIP|mKIAA1678	SPHK1 interactor, AKAP domain containing	protein-coding
Peaks_712	chr1	4080275	4080501	+	0	NA	Intergenic	L1Md_A|LINE|L1	279926	NM_011283	19888	Mm.294263	NM_011283	ENSMUSG00000025900	Rp1	Dcdc3|Orp1|Rp1h|mG145	retinitis pigmentosa 1 (human)	protein-coding
Peaks_529	chr11	60575009	60575292	+	0	NA	Intergenic	Intergenic	37467	NM_172943	268420	Mm.262056	NM_172943	ENSMUSG00000042650	Alkbh5	AW050020|AW215868|Abh5|E130207K11|Ofoxd	alkB homolog 5, RNA demethylase	protein-coding
Peaks_1461	chr3	152165269	152166350	+	0	NA	promoter-TSS (NM_016867)	promoter-TSS (NM_016867)	91	NM_016867	54120	Mm.97	NM_016867	ENSMUSG00000039131	Gipc2	2200002N01Rik|AU021850|Semcap2	GIPC PDZ domain containing family, member 2	protein-coding
Peaks_804	chr11	24513926	24514300	+	0	NA	intron (NR_045857, intron 1 of 3)	RMER1B|Other|Other	32204	NR_045857	71316	Mm.79162	NR_045857	ENSMUSG00000086892	4933430M04Rik	-	RIKEN cDNA 4933430M04 gene	ncRNA
Peaks_472	chr1	110333781	110333896	+	0	NA	Intergenic	IAPEz-int|LTR|ERVK	350115	NM_172853	241201	Mm.213407	NM_172853	ENSMUSG00000026312	Cdh7	9330156F07Rik|CDH7L1	cadherin 7, type 2	protein-coding
Peaks_702	chr1	20321048	20321692	+	0	NA	intron (NM_153179, intron 48 of 66)	L1Md_A|LINE|L1	-35084	NR_045734	75028	Mm.417820	NR_045734	ENSMUSG00000089914	4930486I03Rik	-	RIKEN cDNA 4930486I03 gene	ncRNA
Peaks_1749	chr6	59208650	59209527	+	0	NA	5' UTR (NM_001081145, exon 1 of 2)	5' UTR (NM_001081145, exon 1 of 2)	218	NM_001081145	68140	Mm.25843	NM_001081145	ENSMUSG00000049232	Tigd2	3632410O17Rik	tigger transposable element derived 2	protein-coding
Peaks_132	chr1	16896207	16896737	+	0	NA	Intergenic	MERVL-int|LTR|ERVL	201417	NM_020604	57339	Mm.143761	NM_020604	ENSMUSG00000042686	Jph1	ENSMUSG00000054314|JP-1|Jp1	junctophilin 1	protein-coding
Peaks_63	chrX	37254058	37254313	+	0	NA	promoter-TSS (NM_001184969)	promoter-TSS (NM_001184969)	-693	NM_001184969	100135657	Mm.379498	NM_001184969	ENSMUSG00000059626	Rhox3e	ENSMUSG00000071772|OTTMUSG00000017148|Rhox3.5|Rhox3d	reproductive homeobox 3E	protein-coding
Peaks_243	chr15	100898452	100899002	+	0	NA	intron (NM_001077499, intron 1 of 26)	intron (NM_001077499, intron 1 of 26)	28082	NM_001077499	20273	Mm.385012	NM_011323	ENSMUSG00000023033	Scn8a	AI853486|C630029C19Rik|NaCh6|Nav1.6|dmu|med|mnd-2|mnd2|nmf2|nmf335|nmf58|nur14|seal	sodium channel, voltage-gated, type VIII, alpha	protein-coding
Peaks_1649	chr8	27319356	27320118	+	0	NA	Intergenic	L1Md_T|LINE|L1	23692	NR_003107	732482	Mm.463248	NR_003107		Gm9731	-	Fam58a pseudogene	pseudo
Peaks_337	chr1	82425560	82426114	+	0	NA	intron (NM_029777, intron 6 of 6)	MERVL-int|LTR|ERVL	86788	NM_001122685	76867	Mm.226994	NM_029777	ENSMUSG00000026142	Rhbdd1	4930418P06Rik|RRP4|mRHBDD1	rhomboid domain containing 1	protein-coding
Peaks_1658	chrX	157677192	157677348	+	0	NA	Intergenic	L1Md_F3|LINE|L1	-21703	NR_045569	66106	Mm.140340	NM_025357	ENSMUSG00000041476	Smpx	1010001C09Rik|Csl	small muscle protein, X-linked	protein-coding
Peaks_1449	chr12	55124288	55125135	+	0	NA	exon (NM_028527, exon 1 of 5)	exon (NM_028527, exon 1 of 5)	183	NM_028527	73385	Mm.439875	NM_028527	ENSMUSG00000095595	Fam177a	1700047I17Rik|1700047I17Rik1|C14orf24|D730001C10Rik|Fam177a1	family with sequence similarity 177, member A	protein-coding
Peaks_415	chr1	114213507	114214057	+	0	NA	Intergenic	IAPEy-int|LTR|ERVK	-1471355	NM_001077425	636808	Mm.101576	NM_001077425	ENSMUSG00000070695	Cntnap5a	Caspr5-1|EG636808	contactin associated protein-like 5A	protein-coding
Peaks_1278	chr6	74181532	74181642	+	0	NA	Intergenic	L1_Mus1|LINE|L1	-710566	NR_108032	73408	Mm.233629	NR_108032	ENSMUSG00000107408	1700065L07Rik	-	RIKEN cDNA 1700065L07 gene	ncRNA
Peaks_1445	chr3	53114573	53114714	+	0	NA	intron (NM_175386, intron 2 of 3)	MMETn-int|LTR|ERVK	73096	NM_175386	108927	Mm.118617	NM_175386	ENSMUSG00000048332	Lhfp	2810489O06Rik|AI194968	lipoma HMGIC fusion partner	protein-coding
Peaks_849	chr13	66062397	66062469	+	0	NA	Intergenic	Intergenic	-51020	NM_001177832	628709	Mm.390595	NM_001177832	ENSMUSG00000095909	Gm10324	ENSMUSG00000071302	predicted gene 10324	protein-coding
Peaks_1105	chr1	69701869	69702510	+	0	NA	Intergenic	IAPEz-int|LTR|ERVK	-16229	NM_011770	22779	Mm.106343	NM_011770	ENSMUSG00000025997	Ikzf2	A730095J18Rik|Helios|Zfpn1a2|Znfn1a2	IKAROS family zinc finger 2	protein-coding
Peaks_102	chr13	85126656	85127457	+	0	NA	Intergenic	Intergenic	-62329	NM_001347587	66671	Mm.18474	NM_023243	ENSMUSG00000021548	Ccnh	6330408H09Rik|AI661354|AV102684|AW538719	cyclin H	protein-coding
Peaks_1297	chr3	80913129	80913870	+	0	NA	intron (NM_001345959, intron 1 of 10)	CpG	161	NM_001345956	14658	Mm.275639	NM_010298	ENSMUSG00000028020	Glrb	AI853901|Glyrb|spa|spastic	glycine receptor, beta subunit	protein-coding
Peaks_23	chr4	156342481	156343367	+	0	NA	Intergenic	Intergenic	11798	NM_009485	22300	Mm.377117	NM_009485		Vmn2r123	V2r1	vomeronasal 2, receptor 123	protein-coding
Peaks_447	chr11	80518469	80518779	+	0	NA	intron (NM_177390, intron 21 of 21)	intron (NM_177390, intron 21 of 21)	-9518	NR_126552	77417	Mm.437510	NR_126552	ENSMUSG00000085078	C030013C21Rik	-	RIKEN cDNA C030013C21 gene	ncRNA
Peaks_51	chr7	15138734	15139052	+	0	NA	Intergenic	B1_Mur3|SINE|Alu	-249958	NM_145708	246792	Mm.26391	NM_145708	ENSMUSG00000074369	Obox2	-	oocyte specific homeobox 2	protein-coding
Peaks_490	chrX	157547055	157547382	+	0	NA	TTS (NM_172307)	TTS (NM_172307)	6414	NR_040420	625253	Mm.463485	NR_040420		Gm6568	EG625253	DnaJ (Hsp40) homolog, subfamily B, member 9 pseudogene	pseudo
Peaks_381	chr3	98485634	98486250	+	0	NA	Intergenic	ORR1A0-int|LTR|ERVL-MaLR	24530	NM_001111336	15495	Mm.14309	NM_008294	ENSMUSG00000095143	Hsd3b4	-	hydroxy-delta-5-steroid dehydrogenase, 3 beta- and steroid delta-isomerase 4	protein-coding
Peaks_357	chr2	17633947	17634181	+	0	NA	intron (NM_028757, intron 2 of 6)	MTA_Mm-int|LTR|ERVL-MaLR	70550	NR_105847	102465964		NR_105847	ENSMUSG00000099161	Mir6419	Gm27713|mmu-mir-6419	microRNA 6419	ncRNA
Peaks_1562	chr2	172201613	172201825	+	0	NA	Intergenic	Intergenic	-46773	NM_008561	17201	Mm.57183	NM_008561	ENSMUSG00000038537	Mc3r	MC3-R	melanocortin 3 receptor	protein-coding
Peaks_960	chr1	10792562	10792662	+	0	NA	intron (NR_030645, intron 2 of 3)	L1Md_A|LINE|L1	-72667	NM_177834	329093	Mm.336423	NM_177834	ENSMUSG00000042501	Cpa6	9030616D13Rik	carboxypeptidase A6	protein-coding
Peaks_125	chr1	129394530	129395455	+	0	NA	intron (NM_172485, intron 1 of 27)	MERVL-int|LTR|ERVL	121688	NM_172485	210417	Mm.380518	NM_172485	ENSMUSG00000042581	Thsd7b	1700074E13Rik|B930082A18|D130067I03Rik	thrombospondin, type I, domain containing 7B	protein-coding
Peaks_1233	chr3	21564156	21564462	+	0	NA	Intergenic	Intergenic	-512343	NM_030732	81004	Mm.202966	NM_030732	ENSMUSG00000027630	Tbl1xr1	8030499H02Rik|A630076E03Rik|AW539987|C21|C230089I12Rik|DC42|Ira1|TBLR1	transducin (beta)-like 1X-linked receptor 1	protein-coding
Peaks_258	chr10	107123232	107124313	+	0	NA	promoter-TSS (NM_001142804)	promoter-TSS (NM_001142804)	-108	NM_198636	380660	Mm.336072	NM_198636	ENSMUSG00000035948	Acss3	8430416H19Rik|Gm874	acyl-CoA synthetase short-chain family member 3	protein-coding
Peaks_709	chr1	17921750	17922648	+	0	NA	Intergenic	L1Md_T|LINE|L1	-194553	NR_130314	102634913	Mm.319094	NR_130314	ENSMUSG00000085125	Gm16070	OTTMUSG00000029756	predicted gene 16070	ncRNA
Peaks_314	chr14	42134619	42135182	+	0	NA	Intergenic	Intergenic	-39623	NR_073362	73553	Mm.243777	NM_028570	ENSMUSG00000090462	1700091H14Rik	100041930|Gm3578	RIKEN cDNA 1700091H14 gene	ncRNA
Peaks_1366	chr13	110018453	110018872	+	0	NA	Intergenic	Intergenic	114853	NR_035442	100316683		NR_035442	ENSMUSG00000084651	Mir1904	Mirn1904|mmu-mir-1904	microRNA 1904	ncRNA
Peaks_557	chr1	8441944	8442603	+	0	NA	intron (NM_027671, intron 19 of 20)	L1Md_F2|LINE|L1	857604	NM_001290390	71096	Mm.336395	NM_027671	ENSMUSG00000025909	Sntg1	4933426D16Rik|G1SYN|SYN4	syntrophin, gamma 1	protein-coding
Peaks_424	chr6	9889877	9890218	+	0	NA	Intergenic	Intergenic	940028	NM_008751	18231	Mm.46954	NM_008751	ENSMUSG00000046178	Nxph1	C130005L03Rik	neurexophilin 1	protein-coding
Peaks_1639	chr17	43801570	43802358	+	0	NA	5' UTR (NM_207649, exon 1 of 5)	5' UTR (NM_207649, exon 1 of 5)	113	NM_207649	53901	Mm.251242	NM_030598	ENSMUSG00000039601	Rcan2	Csp2|Dscr1l1|MCIP2|ZAKI-4	regulator of calcineurin 2	protein-coding
Peaks_891	chr1	8845644	8845852	+	0	NA	intron (NM_001290392, intron 3 of 17)	RLTR6B_Mm|LTR|ERV1	454129	NM_001290390	71096	Mm.336395	NM_027671	ENSMUSG00000025909	Sntg1	4933426D16Rik|G1SYN|SYN4	syntrophin, gamma 1	protein-coding
Peaks_116	chr1	6946772	6947490	+	0	NA	Intergenic	L1Md_F2|LINE|L1	-141789	NM_183028	319263	Mm.21539	NM_183028	ENSMUSG00000051285	Pcmtd1	8430411F12Rik|A030012M09Rik	protein-L-isoaspartate (D-aspartate) O-methyltransferase domain containing 1	protein-coding
Peaks_392	chr1	44380082	44380463	+	0	NA	Intergenic	MMERVK10C-int|LTR|ERVK	-161341	NM_207281	403183	Mm.336176	NM_207281	ENSMUSG00000046828	Mettl21e	4832428D23Rik|Gm991	methyltransferase like 21E	protein-coding
Peaks_15	chr1	152663627	152663879	+	0	NA	intron (NM_001346118, intron 2 of 18)	IAPEz-int|LTR|ERVK	-38536	NM_016846	19731	Mm.245270	NM_016846	ENSMUSG00000026482	Rgl1	Rgl|mKIAA0959	ral guanine nucleotide dissociation stimulator,-like 1	protein-coding
Peaks_200	chr1	57586922	57587142	+	0	NA	Intergenic	IAPEz-int|LTR|ERVK	-180358	NM_001302963	68736	Mm.288490	NM_001037742	ENSMUSG00000048495	Tyw5	1110034B05Rik	tRNA-yW synthesizing protein 5	protein-coding
Peaks_328	chr19	47414356	47414645	+	0	NA	intron (NM_001164717, intron 2 of 13)	intron (NM_001164717, intron 2 of 13)	49911	NM_001164717	14218	Mm.127560	NM_008018	ENSMUSG00000053617	Sh3pxd2a	2310014D11Rik|AA589508|AI256723|AI413738|C230050L11|EG329070|Fish|Gm5098|Sh3md1|TSK5|Tks5	SH3 and PX domains 2A	protein-coding
Peaks_1042	chr4	78211452	78212399	+	0	NA	promoter-TSS (NM_011211)	promoter-TSS (NM_011211)	-30	NM_011211	19266	Mm.184021	NM_011211	ENSMUSG00000028399	Ptprd	1110002J03Rik|3000002J10Rik|B230219D21Rik|R-PTP-delta	protein tyrosine phosphatase, receptor type, D	protein-coding
Peaks_1140	chr1	3155882	3156123	+	0	NA	Intergenic	RLTRETN_Mm|LTR|ERVK	515496	NM_001011874	497097	Mm.454496	NM_001011874	ENSMUSG00000051951	Xkr4	AY534250|Gm210|XRG4|mKIAA1889	X-linked Kx blood group related 4	protein-coding
Peaks_927	chr1	16896890	16897157	+	0	NA	Intergenic	MERVL-int|LTR|ERVL	200866	NM_020604	57339	Mm.143761	NM_020604	ENSMUSG00000042686	Jph1	ENSMUSG00000054314|JP-1|Jp1	junctophilin 1	protein-coding
Peaks_828	chr9	106393373	106393679	+	0	NA	Intergenic	Intergenic	24894	NM_153459	235584	Mm.275584	NM_153459	ENSMUSG00000053716	Dusp7	AU015694|Mkpx|Pyst2	dual specificity phosphatase 7	protein-coding
Peaks_1281	chr16	5132318	5132664	+	0	NA	promoter-TSS (NM_008909)	promoter-TSS (NM_008909)	-10	NM_008909	19041	Mm.266875	NM_008909	ENSMUSG00000039457	Ppl	AW553870	periplakin	protein-coding
Peaks_162	chr7	59722805	59723015	+	0	NA	Intergenic	Intergenic	3342	NR_002895	64243	Mm.423722	NR_002895	ENSMUSG00000096019	Snord116	MBII-85|Pwcr1	small nucleolar RNA, C/D box 116	snoRNA
Peaks_837	chr1	5808438	5809991	+	0	NA	Intergenic	IAPEz-int|LTR|ERVK	108184	NM_010342	226304	Mm.291110	NM_010342	ENSMUSG00000033774	Npbwr1	Gpr7|Nbpwr1	neuropeptides B/W receptor 1	protein-coding
Peaks_566	chr2	132144580	132145456	+	0	NA	promoter-TSS (NM_018824)	promoter-TSS (NM_018824)	90	NM_018824	54338	Mm.103581	NM_018824	ENSMUSG00000027340	Slc23a2	AI844736|NBTL1|SVCT2|Slc23a1|YSPL2|YSPL3|mKIAA0238	solute carrier family 23 (nucleobase transporters), member 2	protein-coding
Peaks_1023	chr2	20385721	20385899	+	0	NA	intron (NM_001081006, intron 2 of 21)	MMERGLN-int|LTR|ERV1	95897	NM_001081006	208618	Mm.237935	NM_029895	ENSMUSG00000036617	Etl4	6620402G01Rik|9430077C05Rik|BC026657|E330027G05Rik|Etl-4|Skt	enhancer trap locus 4	protein-coding
Peaks_195	chr1	60729376	60729700	+	0	NA	Intergenic	IAPEz-int|LTR|ERVK	-16850	NM_007642	12487	Mm.255003	NM_007642	ENSMUSG00000026012	Cd28	-	CD28 antigen	protein-coding
Peaks_797	chr11	108995197	108995599	+	0	NA	Intergenic	Intergenic	75049	NM_015732	12006	Mm.71710	NM_015732	ENSMUSG00000000142	Axin2	Axi1|Axil|Conductin	axin 2	protein-coding
Peaks_826	chr1	4560277	4561718	+	0	NA	Intergenic	L1Md_T|LINE|L1	-63643	NM_001289465	20671	Mm.279103	NM_011441	ENSMUSG00000025902	Sox17	-	SRY (sex determining region Y)-box 17	protein-coding
Peaks_1035	chr2	79038727	79039117	+	0	NA	Intergenic	Intergenic	169875	NM_009454	22193	Mm.1485	NM_009454	ENSMUSG00000027011	Ube2e3	Ubce4|ubcM2	ubiquitin-conjugating enzyme E2E 3	protein-coding
Peaks_41	chr16	54156974	54157312	+	0	NA	Intergenic	RMER1A|Other|Other	1126094	NM_178720	239852	Mm.245045	NM_178720	ENSMUSG00000064310	Zpld1	9430016A21Rik	zona pellucida like domain containing 1	protein-coding
Peaks_875	chr13	7196102	7196319	+	0	NA	Intergenic	Intergenic	-547439	NM_001291071	56421	Mm.273874	NM_019703	ENSMUSG00000021196	Pfkp	1200015H23Rik|9330125N24Rik|ATP-PFK|PFK-C|PFK-P	phosphofructokinase, platelet	protein-coding
Peaks_625	chr1	19628363	19629303	+	0	NA	Intergenic	IAPEz-int|LTR|ERVK	416779	NM_001025305	21419	Mm.137021	NM_009334	ENSMUSG00000025927	Tfap2b	AI606113|AP-2(beta)|E130018K07Rik|Tcfap2b	transcription factor AP-2 beta	protein-coding
Peaks_726	chr7	20194106	20194301	+	0	NA	exon (NM_001166750, exon 1 of 1)	exon (NM_001166750, exon 1 of 1)	493	NM_001166750	667469	Mm.484971	NM_001166750	ENSMUSG00000096071	Vmn1r143	EG667469|Gm8650	vomeronasal 1 receptor 143	protein-coding
Peaks_1576	chr1	23305430	23305870	+	0	NA	Intergenic	IAPEz-int|LTR|ERVK	13949	NR_029717	723964		NR_029717	ENSMUSG00000065567	Mir30c-2	Mirn30c-2|mir-30c-2	microRNA 30c-2	ncRNA
Peaks_453	chr7	88430020	88430689	+	0	NA	promoter-TSS (NM_028238)	promoter-TSS (NM_028238)	81	NM_028238	72433	Mm.276669	NM_028238	ENSMUSG00000030559	Rab38	2310011F14Rik|AU043391|cht	RAB38, member RAS oncogene family	protein-coding
Peaks_980	chr7	15133608	15133912	+	0	NA	Intergenic	MTA_Mm|LTR|ERVL-MaLR	-255091	NM_145708	246792	Mm.26391	NM_145708	ENSMUSG00000074369	Obox2	-	oocyte specific homeobox 2	protein-coding
Peaks_1517	chr1	171063786	171066197	+	0	NA	promoter-TSS (NR_106103)	promoter-TSS (NR_106103)	-339	NR_106103	102466998		NR_106103	ENSMUSG00000099119	Mir6546	Gm27408|mmu-mir-6546	microRNA 6546	ncRNA
Peaks_1838	chr1	5553023	5553692	+	0	NA	Intergenic	L1Md_A|LINE|L1	-35136	NM_011011	18387	Mm.7977	NM_011011	ENSMUSG00000025905	Oprk1	K-OR-1|KOR|KOR-1|MSL-1|Oprk2|R21	opioid receptor, kappa 1	protein-coding
Peaks_727	chr7	116268164	116268366	+	0	NA	intron (NM_001305185, intron 3 of 26)	intron (NM_001305185, intron 3 of 26)	-30489	NM_001305186	233765	Mm.3741	NM_172743	ENSMUSG00000045659	Plekha7	A430081P20Rik|AI414265	pleckstrin homology domain containing, family A member 7	protein-coding
Peaks_1071	chr1	15496677	15497409	+	0	NA	intron (NM_001098528, intron 1 of 1)	L1Md_T|LINE|L1	184591	NM_001098528	98741	Mm.156081	NM_001033195	ENSMUSG00000092083	Kcnb2	9630047L19Rik|BB130875|Kv2.2	potassium voltage gated channel, Shab-related subfamily, member 2	protein-coding
Peaks_603	chr5	36630317	36630812	+	0	NA	intron (NM_001081232, intron 2 of 8)	intron (NM_001081232, intron 2 of 8)	-44338	NM_001113362	100855	Mm.486203	NM_133910	ENSMUSG00000029192	Tbc1d14	2810413P16Rik|AU043625|C86258|D5Ertd110e|mKIAA1322	TBC1 domain family, member 14	protein-coding
Peaks_1387	chr17	45886539	45886892	+	0	NA	Intergenic	Intergenic	138448	NM_001110267	22339	Mm.282184	NM_009505	ENSMUSG00000023951	Vegfa	Vegf|Vpf	vascular endothelial growth factor A	protein-coding
Peaks_416	chr1	88835457	88835558	+	0	NA	Intergenic	MERVL-int|LTR|ERVL	80617	NR_040493	78650	Mm.243767	NR_040493	ENSMUSG00000097398	Platr5	2410088K16Rik	pluripotency associated transcript 5	ncRNA
Peaks_28	chr12	97061396	97061755	+	0	NA	Intergenic	Intergenic	-1014353	NR_103800	69423	Mm.46121	NM_027076		1700019M22Rik	-	NFX-like protein	pseudo
Peaks_376	chr6	114572549	114572986	+	0	NA	Intergenic	IMPB_01|Satellite|Satellite	-70330	NM_028835	74244	Mm.275332	NM_028835	ENSMUSG00000030314	Atg7	1810013K23Rik|Agp7|Apg7l|Atg7l|Gm21553	autophagy related 7	protein-coding
Peaks_755	chr2	80962204	80963680	+	0	NA	Intergenic	L1Md_T|LINE|L1	323678	NM_001190179	69482	Mm.29200	NM_027091	ENSMUSG00000026999	Nup35	2310006I24Rik|35kDa|5330402E05Rik|MP44|NO44	nucleoporin 35	protein-coding
Peaks_1418	chr1	48899697	48899898	+	0	NA	Intergenic	L1Md_F2|LINE|L1	-1432672	NR_105768	102466969		NR_105768	ENSMUSG00000098876	Mir6350	Gm27958|mmu-mir-6350	microRNA 6350	ncRNA
Peaks_1771	chr2	71852427	71852645	+	0	NA	intron (NM_001277970, intron 24 of 24)	IAPEY4_LTR|LTR|ERVK	-20688	NM_172665	228026	Mm.34411	NM_172665	ENSMUSG00000006494	Pdk1	B830012B01|D530020C15Rik	pyruvate dehydrogenase kinase, isoenzyme 1	protein-coding
Peaks_1079	chr7	59674646	59675077	+	0	NA	intron (NR_015351, intron 2 of 5)	intron (NR_015351, intron 2 of 5)	1218	NR_002895	64243	Mm.423722	NR_002895	ENSMUSG00000096019	Snord116	MBII-85|Pwcr1	small nucleolar RNA, C/D box 116	snoRNA
Peaks_853	chr8	80119331	80119790	+	0	NA	Intergenic	Intergenic	-61552	NM_020259	15245	Mm.254493	NM_020259	ENSMUSG00000064325	Hhip	Hhip1	Hedgehog-interacting protein	protein-coding
Peaks_612	chr1	5807537	5808257	+	0	NA	Intergenic	IAPEz-int|LTR|ERVK	109501	NM_010342	226304	Mm.291110	NM_010342	ENSMUSG00000033774	Npbwr1	Gpr7|Nbpwr1	neuropeptides B/W receptor 1	protein-coding
Peaks_305	chr2	30192228	30192671	+	0	NA	intron (NM_172404, intron 3 of 13)	intron (NM_172404, intron 3 of 13)	13250	NM_172404	70266	Mm.216089	NM_172404	ENSMUSG00000039648	Kyat1	2010009K05Rik|AI182306|Ccbl1|Gtk|Kat1|KatI	kynurenine aminotransferase 1	protein-coding
Peaks_526	chr1	10892500	10893998	+	0	NA	Intergenic	MERVL-int|LTR|ERVL	-27375	NR_030645	100124448		NR_030645	ENSMUSG00000076948	Mir467e	Mirn467e	microRNA 467e	ncRNA
Peaks_1152	chr1	70237252	70237518	+	0	NA	intron (NM_029160, intron 11 of 16)	IAPLTR1a_Mm|LTR|ERVK	285770	NM_025728	66722	Mm.440554	NM_025728	ENSMUSG00000053153	Spag16	4921511D23Rik|4930524F24Rik|4930585K05Rik|AV261009|Pf20|Wdr29	sperm associated antigen 16	protein-coding
Peaks_584	chr5	83239081	83239399	+	0	NA	Intergenic	Lx8|LINE|L1	115955	NM_153801	243078	Mm.126783	NM_153801	ENSMUSG00000049537	Tecrl	D330017N19Rik|Srd5a2l2	trans-2,3-enoyl-CoA reductase-like	protein-coding
Peaks_127	chr1	7332445	7333516	+	0	NA	Intergenic	L1Md_T|LINE|L1	244060	NM_183028	319263	Mm.21539	NM_183028	ENSMUSG00000051285	Pcmtd1	8430411F12Rik|A030012M09Rik	protein-L-isoaspartate (D-aspartate) O-methyltransferase domain containing 1	protein-coding
Peaks_513	chr1	12038774	12040386	+	0	NA	Intergenic	RLTR10-int|LTR|ERVK	-386406	NR_105759	102465961		NR_105759	ENSMUSG00000098555	Mir6341	Gm27262|mmu-mir-6341	microRNA 6341	ncRNA
Peaks_298	chr1	45734532	45735014	+	0	NA	Intergenic	IAPEz-int|LTR|ERVK	-60728	NM_028599	73674	Mm.270376	NM_028599	ENSMUSG00000025995	Wdr75	1300003A18Rik|2410118I19Rik|C77608	WD repeat domain 75	protein-coding
Peaks_1712	chr1	22533097	22534134	+	0	NA	intron (NM_001012623, intron 7 of 14).2	CpG-67	-100772	NM_183018	116837	Mm.60061	NM_053270	ENSMUSG00000041670	Rims1	C030033M19Rik|RIM1|RIM1a|RIM1alpha|Rab3ip1|Rim|Serg1|mKIAA0340	regulating synaptic membrane exocytosis 1	protein-coding
Peaks_497	chr14	118511772	118511922	+	0	NA	intron (NM_001033336, intron 26 of 30)	intron (NM_001033336, intron 26 of 30)	80625	NR_105815	102465208		NR_105815	ENSMUSG00000098433	Mir6391	Gm27914|mmu-mir-6391	microRNA 6391	ncRNA
Peaks_5	chr2	22589142	22590158	+	0	NA	Intergenic	Intergenic	-32677	NM_008078	14417	Mm.4784	NM_008078	ENSMUSG00000026787	Gad2	6330404F12Rik|GAD(65)|GAD65|Gad-2	glutamic acid decarboxylase 2	protein-coding
Peaks_1338	chr1	8798305	8799149	+	0	NA	intron (NM_027671, intron 5 of 20)	MTA_Mm-int|LTR|ERVL-MaLR	501150	NM_001290390	71096	Mm.336395	NM_027671	ENSMUSG00000025909	Sntg1	4933426D16Rik|G1SYN|SYN4	syntrophin, gamma 1	protein-coding
Peaks_344	chr10	104144394	104145165	+	0	NA	exon (NM_001270642, exon 2 of 2)	exon (NM_001270642, exon 2 of 2)	1792	NM_001270644	637578	Mm.441727	NM_001270644	ENSMUSG00000095022	Gm20765	-	predicted gene, 20765	protein-coding
Peaks_773	chr4	80864502	80865023	+	0	NA	Intergenic	Intergenic	30549	NM_001282015	22178	Mm.30438	NM_031202	ENSMUSG00000005994	Tyrp1	Oca3|TRP-1|TRP1|Tyrp|b|brown|isa	tyrosinase-related protein 1	protein-coding
Peaks_786	chr8	10977852	10978276	+	0	NA	Intergenic	Intergenic	-29786	NR_046017	619321	Mm.403007	NR_046017	ENSMUSG00000096938	9530052E02Rik	-	RIKEN cDNA 9530052E02 gene	ncRNA
Peaks_744	chr3	17489685	17490028	+	0	NA	Intergenic	Intergenic	-300065	NR_033490	70441	Mm.458192	NR_033490	ENSMUSG00000100252	Mir124-2hg	100040120|2610100L16Rik|6430547I21Rik|A930005K07Rik|AW125202|Gm2612	Mir124-2 host gene (non-protein coding)	ncRNA
Peaks_240	chr3	149462187	149462549	+	0	NA	Intergenic	Intergenic	187631	NR_040591	381482	Mm.393866	NR_040591		Gm1653	-	predicted gene 1653	ncRNA
Peaks_1316	chr1	29947460	29947685	+	0	NA	Intergenic	IAPEz-int|LTR|ERVK	526084	NR_105760	102465174		NR_105760	ENSMUSG00000099257	Mir6342	Gm27268|mmu-mir-6342	microRNA 6342	ncRNA
Peaks_1215	chr3	116251463	116252925	+	0	NA	exon (NM_022427, exon 2 of 2)	exon (NM_022427, exon 2 of 2)	1290	NM_022427	64378	Mm.40025	NM_022427	ENSMUSG00000068696	Gpr88	AW061286|Strg	G-protein coupled receptor 88	protein-coding
Peaks_1081	chr2	66256097	66257149	+	0	NA	promoter-TSS (NM_001290669)	promoter-TSS (NM_001290669)	-6	NM_001290669	73668	Mm.250868	NM_001047604	ENSMUSG00000034848	Ttc21b	2410066K11Rik|Thm1|aln|mKIAA1992	tetratricopeptide repeat domain 21B	protein-coding
Peaks_232	chr1	4081187	4081267	+	0	NA	Intergenic	L1Md_A|LINE|L1	279087	NM_011283	19888	Mm.294263	NM_011283	ENSMUSG00000025900	Rp1	Dcdc3|Orp1|Rp1h|mG145	retinitis pigmentosa 1 (human)	protein-coding
Peaks_193	chr6	24384077	24384472	+	0	NA	Intergenic	RMER1C|Other|Other	130793	NM_172535	214704	Mm.61131	NM_172535	ENSMUSG00000046192	Iqub	4932408B21Rik|Trs4	IQ motif and ubiquitin domain containing	protein-coding
Peaks_1854	chr9	65264718	65264926	+	0	NA	promoter-TSS (NM_173385)	promoter-TSS (NM_173385)	-358	NM_173385	214425	Mm.138455	NM_173385	ENSMUSG00000042254	Cilp	9830114D16|C130036G17Rik	cartilage intermediate layer protein, nucleotide pyrophosphohydrolase	protein-coding
Peaks_409	chr1	21996016	21996196	+	0	NA	Intergenic	IAPEz-int|LTR|ERVK	-33456	NM_001310477	226922	Mm.336519	NM_023872	ENSMUSG00000028033	Kcnq5	7730402H11|9230107O05Rik|AA589396|D1Mgi1	potassium voltage-gated channel, subfamily Q, member 5	protein-coding
Peaks_83	chr1	11889195	11890127	+	0	NA	intron (NM_001310451, intron 10 of 12)	IAPEz-int|LTR|ERVK	475556	NM_001160371	320492	Mm.52021	NM_177173	ENSMUSG00000057715	A830018L16Rik	-	RIKEN cDNA A830018L16 gene	protein-coding
Peaks_1090	chr7	100012558	100012745	+	0	NA	intron (NM_001291320, intron 1 of 10)	intron (NM_001291320, intron 1 of 10)	2733	NM_001291320	69121	Mm.285295	NM_133709	ENSMUSG00000030732	Chrdl2	1810022C01Rik|Chl2	chordin-like 2	protein-coding
Peaks_1279	chr1	16741165	16741544	+	0	NA	Intergenic	IAPEz-int|LTR|ERVK	52898	NM_016923	17087	Mm.116844	NM_016923	ENSMUSG00000025779	Ly96	ESOP-1|MD-2|MD2	lymphocyte antigen 96	protein-coding
Peaks_1478	chr1	4561918	4562016	+	0	NA	Intergenic	L1Md_T|LINE|L1	-64613	NM_001289465	20671	Mm.279103	NM_011441	ENSMUSG00000025902	Sox17	-	SRY (sex determining region Y)-box 17	protein-coding
Peaks_461	chr1	8658422	8659226	+	0	NA	intron (NM_027671, intron 10 of 20)	IAPEz-int|LTR|ERVK	641053	NM_001290390	71096	Mm.336395	NM_027671	ENSMUSG00000025909	Sntg1	4933426D16Rik|G1SYN|SYN4	syntrophin, gamma 1	protein-coding
Peaks_1586	chr1	11782443	11783726	+	0	NA	intron (NM_001160369, intron 8 of 13)	L1Md_T|LINE|L1	368979	NM_001160371	320492	Mm.52021	NM_177173	ENSMUSG00000057715	A830018L16Rik	-	RIKEN cDNA A830018L16 gene	protein-coding
Peaks_547	chr7	59740514	59740924	+	0	NA	Intergenic	Intergenic	10861	NR_002895	64243	Mm.423722	NR_002895	ENSMUSG00000096019	Snord116	MBII-85|Pwcr1	small nucleolar RNA, C/D box 116	snoRNA
Peaks_1409	chr8	54509166	54509620	+	0	NA	Intergenic	Intergenic	20605	NM_029701	76687	Mm.86437	NM_029701	ENSMUSG00000054408	Spcs3	1810011E08Rik|SPC22/23	signal peptidase complex subunit 3 homolog (S. cerevisiae)	protein-coding
Peaks_436	chr10	29143524	29143823	+	0	NA	promoter-TSS (NM_026138)	promoter-TSS (NM_026138)	-323	NM_026138	67412	Mm.390264	NM_026138	ENSMUSG00000038916	Soga3	6330407J23Rik	SOGA family member 3	protein-coding
Peaks_1440	chr1	27186787	27187045	+	0	NA	Intergenic	IAPLTR1_Mm|LTR|ERVK	-499456	NM_001033764	210940	Mm.297614	NM_001033764	ENSMUSG00000073722	4931408C20Rik	-	RIKEN cDNA 4931408C20 gene	protein-coding
Peaks_506	chr1	40916567	40916854	+	0	NA	Intergenic	MTA_Mm|LTR|ERVL-MaLR	111109	NM_001081198	381339	Mm.334678	NM_001081198	ENSMUSG00000079588	Tmem182	2310079P10Rik|AI414494	transmembrane protein 182	protein-coding
Peaks_1180	chr4	40910260	40910768	+	0	NA	Intergenic	Intergenic	-9542	NM_011463	20731	Mm.25246	NM_011463	ENSMUSG00000028415	Spink4	MPGC60	serine peptidase inhibitor, Kazal type 4	protein-coding
Peaks_1863	chr1	74854598	74855240	+	0	NA	promoter-TSS (NM_009872)	promoter-TSS (NM_009872)	-110	NM_009872	12570	Mm.153833	NM_009872	ENSMUSG00000090071	Cdk5r2	B230310J22Rik|p39	cyclin-dependent kinase 5, regulatory subunit 2 (p39)	protein-coding
Peaks_76	chr2	46383551	46383809	+	0	NA	Intergenic	IAPEz-int|LTR|ERVK	687075	NR_040497	69405	Mm.396184	NR_040497	ENSMUSG00000086202	1700019E08Rik	-	RIKEN cDNA 1700019E08 gene	ncRNA
Peaks_1455	chr1	27505691	27506084	+	0	NA	Intergenic	RLTR6B_Mm|LTR|ERV1	-818427	NM_001033764	210940	Mm.297614	NM_001033764	ENSMUSG00000073722	4931408C20Rik	-	RIKEN cDNA 4931408C20 gene	protein-coding
Peaks_150	chr3	77602826	77602985	+	0	NA	Intergenic	IAPEz-int|LTR|ERVK	1527322	NM_001253719	213262	Mm.379337	NM_178673	ENSMUSG00000034098	Fstl5	9130207J01Rik	follistatin-like 5	protein-coding
Peaks_990	chr5	131306324	131306606	+	0	NA	exon (NM_145218, exon 1 of 11)	exon (NM_145218, exon 1 of 11)	1057	NM_145218	212996	Mm.299204	NM_145218	ENSMUSG00000034040	Wbscr17	AA388321|E330012B09Rik	Williams-Beuren syndrome chromosome region 17 homolog (human)	protein-coding
Peaks_402	chr1	48360125	48360789	+	0	NA	Intergenic	IAPEz-int|LTR|ERVK	-893332	NR_105768	102466969		NR_105768	ENSMUSG00000098876	Mir6350	Gm27958|mmu-mir-6350	microRNA 6350	ncRNA
Peaks_655	chr13	109278591	109278830	+	0	NA	intron (NM_011056, intron 3 of 16)	intron (NM_011056, intron 3 of 16)	-46034	NR_030644	100124489		NR_030644	ENSMUSG00000076946	Mir582	Mirn582|mir-582|mmu-mir-582	microRNA 582	ncRNA
Peaks_1187	chr1	3158557	3158763	+	0	NA	Intergenic	L1Md_A|LINE|L1	512838	NM_001011874	497097	Mm.454496	NM_001011874	ENSMUSG00000051951	Xkr4	AY534250|Gm210|XRG4|mKIAA1889	X-linked Kx blood group related 4	protein-coding
Peaks_1229	chr1	179386379	179386887	+	0	NA	intron (NM_027188, intron 5 of 11)	intron (NM_027188, intron 5 of 11)	131370	NM_027188	69726	Mm.222338	NM_027188	ENSMUSG00000055067	Smyd3	2410008A19Rik|Zmynd1	SET and MYND domain containing 3	protein-coding
Peaks_674	chr1	3137434	3137689	+	0	NA	Intergenic	L1Md_A|LINE|L1	533937	NM_001011874	497097	Mm.454496	NM_001011874	ENSMUSG00000051951	Xkr4	AY534250|Gm210|XRG4|mKIAA1889	X-linked Kx blood group related 4	protein-coding
Peaks_1179	chr5	15933985	15935606	+	0	NA	5' UTR (NM_001110843, exon 1 of 39)	5' UTR (NM_001110843, exon 1 of 39)	104	NM_001110844	12293	Mm.159842	NM_009784	ENSMUSG00000040118	Cacna2d1	Ca(v)alpha2delta1|Cacna2|Cchl2a	calcium channel, voltage-dependent, alpha2/delta subunit 1	protein-coding
Peaks_1428	chr1	9715241	9716157	+	0	NA	Intergenic	L1Md_F2|LINE|L1	-15490	NM_008651	17864	Mm.479	NM_008651	ENSMUSG00000025912	Mybl1	A-myb|G1-419-6|repro9	myeloblastosis oncogene-like 1	protein-coding
Peaks_872	chr2	174833645	174833874	+	0	NA	Intergenic	Intergenic	73140	NM_007903	13616	Mm.9478	NM_007903	ENSMUSG00000027524	Edn3	ET-3|PPET3|ls|tmgc48	endothelin 3	protein-coding
Peaks_1300	chr10	109664914	109665214	+	0	NA	Intergenic	Intergenic	335155	NM_001081035	260315	Mm.225050	NM_177797	ENSMUSG00000020181	Nav3	4732483H20Rik|9630020C08Rik|POMFIL1|Pomfil1p|mKIAA0938|unc53H3	neuron navigator 3	protein-coding
Peaks_1599	chr14	48120621	48121862	+	0	NA	intron (NM_033602, intron 1 of 5)	CpG	372	NM_033602	93834	Mm.296457	NM_033602	ENSMUSG00000021846	Peli2	AW047589|BB129927	pellino 2	protein-coding
Peaks_858	chr14	68391957	68392203	+	0	NA	Intergenic	Intergenic	141609	NM_007402	11500	Mm.261495	NM_007402	ENSMUSG00000022056	Adam7	ADAM 7|EAP1|EAPI	a disintegrin and metallopeptidase domain 7	protein-coding
Peaks_1353	chr3	116861214	116861387	+	0	NA	promoter-TSS (NM_009146)	promoter-TSS (NM_009146)	-380	NM_009146	20321	Mm.66293	NM_009146	ENSMUSG00000033386	Frrs1	AI131732|Sdfr2	ferric-chelate reductase 1	protein-coding
Peaks_1077	chr2	180641688	180642881	+	0	NA	exon (NM_178254, exon 1 of 6)	exon (NM_178254, exon 1 of 6)	407	NM_178254	277353	Mm.473700	NM_178254	ENSMUSG00000038932	Tcfl5	AV260129|Figlb|Sosf1	transcription factor-like 5 (basic helix-loop-helix)	protein-coding
Peaks_564	chr6	128134168	128134649	+	0	NA	intron (NM_175414, intron 1 of 8)	intron (NM_175414, intron 1 of 8)	9170	NM_175414	109246	Mm.21814	NM_175414	ENSMUSG00000030352	Tspan9	6720474K14Rik|9430079M16Rik|AU018597	tetraspanin 9	protein-coding
Peaks_1676	chr4	140270041	140270290	+	0	NA	Intergenic	Intergenic	-23354	NM_198610	230868	Mm.298731	NM_198610	ENSMUSG00000040972	Igsf21	BC055811|Gm141	immunoglobulin superfamily, member 21	protein-coding
Peaks_481	chr9	81254511	81254653	+	0	NA	Intergenic	IAPEz-int|LTR|ERVK	-377348	NR_040394	319405	Mm.246494	NR_040393	ENSMUSG00000097466	D430036J16Rik	-	RIKEN cDNA D430036J16 gene	ncRNA
Peaks_118	chr4	60149009	60149554	+	0	NA	Intergenic	Intergenic	-9423	NM_001200004	100039150	Mm.237772	NM_001200004	ENSMUSG00000096674	Mup15	Gm2068|Mup13	major urinary protein 15	protein-coding
Peaks_1021	chrX	162643248	162643879	+	0	NA	promoter-TSS (NM_001290633)	promoter-TSS (NM_001290633)	95	NM_001290633	194590	Mm.442441	NM_178256	ENSMUSG00000040855	Reps2	POB1	RALBP1 associated Eps domain containing protein 2	protein-coding
Peaks_904	chr9	42438308	42438558	+	0	NA	intron (NM_173038, intron 6 of 7)	intron (NM_173038, intron 6 of 7)	33793	NM_173038	272589	Mm.34483	NM_173038	ENSMUSG00000037287	Tbcel	D330014K23|E130107N23Rik|Lrrc35	tubulin folding cofactor E-like	protein-coding
Peaks_1030	chr6	127945786	127946041	+	0	NA	intron (NM_026743, intron 7 of 7)	intron (NM_026743, intron 7 of 7)	58291	NM_026743	68498	Mm.174368	NM_026743	ENSMUSG00000030351	Tspan11	1110014F12Rik|AU067806	tetraspanin 11	protein-coding
Peaks_1324	chr2	145161120	145161430	+	0	NA	Intergenic	Intergenic	-81336	NM_053195	94249	Mm.217171	NM_053195	ENSMUSG00000063873	Slc24a3	NCKX3	solute carrier family 24 (sodium/potassium/calcium exchanger), member 3	protein-coding
Peaks_1806	chr13	76018025	76018963	+	0	NA	promoter-TSS (NM_178916)	promoter-TSS (NM_178916)	68	NM_178916	218341	Mm.266515	NM_178916	ENSMUSG00000043190	Rfesd	AI256775|D030068K09	Rieske (Fe-S) domain containing	protein-coding
Peaks_367	chr1	35898452	35898932	+	0	NA	Intergenic	RLTR10-int|LTR|ERVK	-169708	NM_015818	50785	Mm.213566	NM_015818	ENSMUSG00000045216	Hs6st1	6Ost1	heparan sulfate 6-O-sulfotransferase 1	protein-coding
Peaks_816	chr1	19801610	19801762	+	0	NA	Intergenic	L1Md_T|LINE|L1	-554768	NR_045734	75028	Mm.417820	NR_045734	ENSMUSG00000089914	4930486I03Rik	-	RIKEN cDNA 4930486I03 gene	ncRNA
Peaks_1683	chr1	7997236	7997320	+	0	NA	Intergenic	IAPEz-int|LTR|ERVK	908358	NM_183028	319263	Mm.21539	NM_183028	ENSMUSG00000051285	Pcmtd1	8430411F12Rik|A030012M09Rik	protein-L-isoaspartate (D-aspartate) O-methyltransferase domain containing 1	protein-coding
Peaks_689	chr11	32725480	32725782	+	0	NA	intron (NM_001271349, intron 4 of 11)	intron (NM_001271349, intron 4 of 11)	83076	NM_001271347	103583	Mm.28017	NM_134015	ENSMUSG00000020271	Fbxw11	2310065A07Rik|AA536858|BTRC2|BTRCP2|Fbxw1b|HOS	F-box and WD-40 domain protein 11	protein-coding
Peaks_1650	chr4	145463622	145464374	+	0	NA	promoter-TSS (NR_002888)	promoter-TSS (NR_002888)	-212	NR_002888	545700	Mm.389595	NR_002888	ENSMUSG00000052912	Smarca5-ps	9230115A19Rik|OTTMUSG00000011029	SWI/SNF related, matrix associated, actin depenent ragulator of chromatin, subfamily a, member 5, pseudogene	pseudo
Peaks_881	chr1	40700916	40701296	+	0	NA	intron (NM_001033289, intron 1 of 11)	IAPEz-int|LTR|ERVK	19394	NM_001033289	226999	Mm.256414	NM_001033289	ENSMUSG00000026062	Slc9a2	2210416H12Rik|4932415O19Rik|AV333884|NHE2	solute carrier family 9 (sodium/hydrogen exchanger), member 2	protein-coding
Peaks_1147	chr1	18537106	18537758	+	0	NA	Intergenic	L1Md_T|LINE|L1	-272294	NM_001040027	77673	Mm.99530	NM_183124	ENSMUSG00000067773	Defb41	9230102D03Rik|BD-17|Bd-41|Defb16|Defb17|Gm15386|OTTMUSG00000020946|OTTMUSG00000020948	defensin beta 41	protein-coding
Peaks_1792	chr11	33623700	33623895	+	0	NA	Intergenic	Intergenic	-44840	NM_146017	216643	Mm.99989	NM_146017	ENSMUSG00000020159	Gabrp	-	gamma-aminobutyric acid (GABA) A receptor, pi	protein-coding
Peaks_628	chr1	150488244	150488424	+	0	NA	Intergenic	Intergenic	-22169	NM_001110146	96875	Mm.174256	NM_021400	ENSMUSG00000006014	Prg4	CACP|DOL54|JCAP|MSF|SZP|lubricin	proteoglycan 4 (megakaryocyte stimulating factor, articular superficial zone protein)	protein-coding
Peaks_865	chr15	7263923	7264280	+	0	NA	intron (NM_001289496, intron 6 of 22)	intron (NM_001289496, intron 6 of 22)	123559	NM_013584	16880	Mm.149720	NM_013584	ENSMUSG00000054263	Lifr	A230075M04Rik|AW061234|LIF	leukemia inhibitory factor receptor	protein-coding
Peaks_1169	chr1	4566017	4566459	+	0	NA	Intergenic	L1Md_T|LINE|L1	-68884	NM_001289465	20671	Mm.279103	NM_011441	ENSMUSG00000025902	Sox17	-	SRY (sex determining region Y)-box 17	protein-coding
Peaks_1606	chr1	39081283	39081561	+	0	NA	Intergenic	RLTR10C|LTR|ERVK	93608	NM_026850	68833	Mm.28121	NM_026850	ENSMUSG00000026078	Pdcl3	1110061A19Rik|C80025|Viaf1	phosducin-like 3	protein-coding
Peaks_888	chr1	80007703	80008182	+	0	NA	Intergenic	L1Md_A|LINE|L1	-149277	NM_009255	20720	Mm.3093	NM_009255	ENSMUSG00000026249	Serpine2	B230326M24Rik|PAI-1|PI-7|PI7|PN-1|Spi4	serine (or cysteine) peptidase inhibitor, clade E, member 2	protein-coding
Peaks_1730	chr1	98287578	98288189	+	0	NA	Intergenic	RLTR6-int|LTR|ERV1	-133241	NM_001164233	70866	Mm.389164	NM_027584	ENSMUSG00000026336	Slco6d1	4921511I05Rik	solute carrier organic anion transporter family, member 6d1	protein-coding
Peaks_399	chr8	124588915	124589281	+	0	NA	exon (NM_023709, exon 2 of 20)	exon (NM_023709, exon 2 of 20)	12987	NM_023709	73647	Mm.6209	NM_023709	ENSMUSG00000031981	Capn9	2200003B16Rik|GC36|nCL-4|nCL4	calpain 9	protein-coding
Peaks_188	chr1	7843557	7844032	+	0	NA	Intergenic	L1Md_T|LINE|L1	754874	NM_183028	319263	Mm.21539	NM_183028	ENSMUSG00000051285	Pcmtd1	8430411F12Rik|A030012M09Rik	protein-L-isoaspartate (D-aspartate) O-methyltransferase domain containing 1	protein-coding
Peaks_501	chr12	117533544	117534778	+	0	NA	intron (NM_175930, intron 3 of 27)	CpG	17682	NM_175930	217944	Mm.227642	NM_175930	ENSMUSG00000041992	Rapgef5	4932413M22|C86120|D030051B22Rik|GFR|Mrgef|mKIAA0277|mmr-gef	Rap guanine nucleotide exchange factor (GEF) 5	protein-coding
Peaks_638	chr11	59727657	59728036	+	0	NA	intron (NM_012027, intron 4 of 23)	intron (NM_012027, intron 4 of 23)	12308	NR_045476	69320	Mm.443242	NR_045476	ENSMUSG00000086330	1700007J10Rik	4930573L17Rik	RIKEN cDNA 1700007J10 gene	ncRNA
Peaks_661	chr1	12666350	12666649	+	0	NA	Intergenic	L1Md_T|LINE|L1	-1064	NR_045297	329096	Mm.417782	NR_045297	ENSMUSG00000097171	Gm17644	4932411L15	predicted gene, 17644	ncRNA
Peaks_44	chr13	78871790	78872256	+	0	NA	Intergenic	Intergenic	-673150	NM_010151	13865	Mm.439653	NM_010151	ENSMUSG00000069171	Nr2f1	COUP-TF1|COUP-TFI|COUPTFA|EAR-3|EAR3|Erbal3|SVP44|Tcfcoup1	nuclear receptor subfamily 2, group F, member 1	protein-coding
Peaks_921	chr1	127868524	127869215	+	0	NA	promoter-TSS (NM_178690)	promoter-TSS (NM_178690)	96	NM_178690	226407	Mm.489713	NM_178690	ENSMUSG00000036104	Rab3gap1	1700003B17Rik|4732493F09Rik|AL117896|Rab3gap|p130	RAB3 GTPase activating protein subunit 1	protein-coding
Peaks_146	chr12	113310442	113311065	+	0	NA	Intergenic	Intergenic	124850	NM_153776	69195	Mm.313244	NM_153776	ENSMUSG00000049036	Tmem121	2410008J05Rik|Hole	transmembrane protein 121	protein-coding
Peaks_355	chr1	12264950	12265191	+	0	NA	Intergenic	L1Md_F2|LINE|L1	-160916	NR_105759	102465961		NR_105759	ENSMUSG00000098555	Mir6341	Gm27262|mmu-mir-6341	microRNA 6341	ncRNA
Peaks_800	chr7	59498045	59498215	+	0	NA	Intergenic	Intergenic	-173981	NR_015479	330544	Mm.9002	NR_015479	ENSMUSG00000100826	C230091D08Rik	-	RIKEN cDNA C230091D08 gene	ncRNA
Peaks_474	chr1	18252829	18253460	+	0	NA	intron (NM_183124, intron 1 of 1)	IAPEz-int|LTR|ERVK	11994	NM_183124	77673	Mm.99530	NM_183124	ENSMUSG00000067773	Defb41	9230102D03Rik|BD-17|Bd-41|Defb16|Defb17|Gm15386|OTTMUSG00000020946|OTTMUSG00000020948	defensin beta 41	protein-coding
Peaks_558	chr1	8661739	8662252	+	0	NA	intron (NM_027671, intron 10 of 20)	IAPEz-int|LTR|ERVK	637882	NM_001290390	71096	Mm.336395	NM_027671	ENSMUSG00000025909	Sntg1	4933426D16Rik|G1SYN|SYN4	syntrophin, gamma 1	protein-coding
Peaks_1826	chr1	192155564	192155909	+	0	NA	Intergenic	IAPLTR1_Mm|LTR|ERVK	-17696	NM_001290282	214742	Mm.207457	NM_144814	ENSMUSG00000037395	Rcor3	4921514E24Rik|C730034D20Rik|E130101E15Rik	REST corepressor 3	protein-coding
Peaks_1538	chr3	119958793	119959269	+	0	NA	Intergenic	Intergenic	-175643	NM_019550	56195	Mm.29966	NM_019550	ENSMUSG00000028134	Ptbp2	Ptb2|brPTB|nPTB	polypyrimidine tract binding protein 2	protein-coding
Peaks_1487	chr8	114205136	114206110	+	0	NA	promoter-TSS (NM_173016)	promoter-TSS (NM_173016)	-17	NM_173016	270097	Mm.334825	NM_173016	ENSMUSG00000046844	Vat1l	9430073I07|AI427515|mKIAA1576	vesicle amine transport protein 1 like	protein-coding
Peaks_1762	chr1	158332031	158332387	+	0	NA	intron (NM_207583, intron 1 of 7)	L1Md_T|LINE|L1	24051	NM_207583	240843	Mm.329579	NM_207583	ENSMUSG00000004031	Brinp2	6430517E21Rik|BB361039|Fam5b|mKIAA1747	bone morphogenic protein/retinoic acid inducible neural-specific 2	protein-coding
Peaks_1114	chr1	52317941	52318298	+	0	NA	Intergenic	MMERGLN-int|LTR|ERV1	-84887	NM_001113383	14660	Mm.398608	NM_001081081	ENSMUSG00000026103	Gls	6330442B14|AI314027|B230365M23Rik	glutaminase	protein-coding
Peaks_720	chr7	84749515	84750232	+	0	NA	intron (NR_038175, intron 2 of 4)	L2b|LINE|L2	60233	NR_038175	72495	Mm.382914	NR_038175	ENSMUSG00000085236	2610206C17Rik	-	RIKEN cDNA 2610206C17 gene	ncRNA
Peaks_1092	chr1	112264566	112265113	+	0	NA	Intergenic	IAPEz-int|LTR|ERVK	-399921	NM_001081316	319901	Mm.103468	NM_001081316	ENSMUSG00000038702	Dsel	9330132E09Rik|DS-epi2	dermatan sulfate epimerase-like	protein-coding
Peaks_1163	chr9	78615385	78616089	+	0	NA	5' UTR (NM_153098, exon 1 of 33)	5' UTR (NM_153098, exon 1 of 33)	191	NM_153098	235505	Mm.32955	NM_153098	ENSMUSG00000046186	Cd109	9930012E15Rik|AI480638|GARP	CD109 antigen	protein-coding
Peaks_1209	chr4	108406230	108406942	+	0	NA	exon (NM_024198, exon 1 of 3)	exon (NM_024198, exon 1 of 3)	127	NM_024198	67305	Mm.20164	NM_024198	ENSMUSG00000028597	Gpx7	3110050F08Rik|AI327032|GPX6	glutathione peroxidase 7	protein-coding
Peaks_1560	chr1	6676983	6677623	+	0	NA	intron (NM_001244693, intron 2 of 22)	L1Md_T|LINE|L1	-52748	NR_045189	240690	Mm.234612	NM_173868	ENSMUSG00000033740	St18	AV348974|Myt3|NZF-3|Nzf3|mKIAA0535	suppression of tumorigenicity 18	protein-coding
Peaks_1595	chr1	73007695	73007889	+	0	NA	Intergenic	RLTR10C|LTR|ERVK	8107	NM_009407	21958	Mm.425024	NM_009407	ENSMUSG00000026182	Tnp1	Stp-1|TP1|Tp-1	transition protein 1	protein-coding
Peaks_211	chr1	19627425	19627737	+	0	NA	Intergenic	IAPEz-int|LTR|ERVK	415527	NM_001025305	21419	Mm.137021	NM_009334	ENSMUSG00000025927	Tfap2b	AI606113|AP-2(beta)|E130018K07Rik|Tcfap2b	transcription factor AP-2 beta	protein-coding
Peaks_288	chr18	86710597	86710883	+	0	NA	promoter-TSS (NM_001302356)	promoter-TSS (NM_001302356)	-370	NM_001302356	12405	Mm.70775	NM_172633	ENSMUSG00000024647	Cbln2	6330593N19Rik|A730004O05	cerebellin 2 precursor protein	protein-coding
Peaks_615	chr11	93450552	93451004	+	0	NA	intron (NM_028296, intron 3 of 8)	MamRep1527|LTR|LTR	351488	NM_028296	72605	Mm.342160	NM_028296	ENSMUSG00000056158	Car10	2700029L05Rik|BB085816|Ca10	carbonic anhydrase 10	protein-coding
Peaks_763	chr9	107935658	107936287	+	0	NA	promoter-TSS (NM_145621)	promoter-TSS (NM_145621)	52	NM_145621	235604	Mm.274540	NM_145621	ENSMUSG00000032936	Camkv	1G5|BB074618|BC017634	CaM kinase-like vesicle-associated	protein-coding
Peaks_704	chrX	111894519	111895576	+	0	NA	Intergenic	CpG	-197968	NM_001290459	245596	Mm.246623	NM_001080549	ENSMUSG00000034551	Hdx	D030011N01Rik|Gm380	highly divergent homeobox	protein-coding
Peaks_1346	chr12	116576679	116577395	+	0	NA	intron (NM_011215, intron 1 of 22)	intron (NM_011215, intron 1 of 22)	91317	NM_011215	19276	Mm.206054	NM_011215	ENSMUSG00000056553	Ptprn2	4930425H11Rik|IA2beta|PTP-NP|Phol|mKIAA0387|phogrin	protein tyrosine phosphatase, receptor type, N polypeptide 2	protein-coding
Peaks_1620	chr1	5820472	5821607	+	0	NA	Intergenic	L1Md_A|LINE|L1	96359	NM_010342	226304	Mm.291110	NM_010342	ENSMUSG00000033774	Npbwr1	Gpr7|Nbpwr1	neuropeptides B/W receptor 1	protein-coding
Peaks_968	chr8	20558414	20558505	+	0	NA	Intergenic	Intergenic	-56468	NM_001270553	100861668	Mm.491087	NM_001270553	ENSMUSG00000095294	Gm21119	-	predicted gene, 21119	protein-coding
Peaks_451	chr1	111704370	111705270	+	0	NA	Intergenic	IAPEz-int|LTR|ERVK	160098	NM_001081316	319901	Mm.103468	NM_001081316	ENSMUSG00000038702	Dsel	9330132E09Rik|DS-epi2	dermatan sulfate epimerase-like	protein-coding
Peaks_134	chr1	55926436	55926637	+	0	NA	Intergenic	MERVL-int|LTR|ERVL	-4705	NR_045837	329159	Mm.98697	NR_045837	ENSMUSG00000099950	9130227L01Rik	-	RIKEN cDNA 9130227L01 gene	ncRNA
Peaks_840	chr1	30688939	30689741	+	0	NA	Intergenic	IAPEz-int|LTR|ERVK	173916	NM_001081080	213109	Mm.194486	NM_025871	ENSMUSG00000048874	Phf3	2310061N19Rik|mKIAA0244	PHD finger protein 3	protein-coding
Peaks_335	chr1	34648976	34649892	+	0	NA	Intergenic	MERVL-int|LTR|ERVL	-13224	NR_033627	241051	Mm.282827	NR_033627		AA619741	-	PHD finger protein 19 pseudogene	pseudo
Peaks_26	chr2	22588599	22589087	+	0	NA	Intergenic	Intergenic	-33484	NM_008078	14417	Mm.4784	NM_008078	ENSMUSG00000026787	Gad2	6330404F12Rik|GAD(65)|GAD65|Gad-2	glutamic acid decarboxylase 2	protein-coding
Peaks_1844	chr1	28891076	28891496	+	0	NA	Intergenic	IAPEz-int|LTR|ERVK	-111034	NM_001013750	210962	Mm.214178	NM_001013750	ENSMUSG00000048411	Gm597	-	predicted gene 597	protein-coding
Peaks_1447	chr5	25815718	25816989	+	0	NA	intron (NM_001310504, intron 3 of 10)	(CTGTG)n|Simple_repeat|Simple_repeat	56380	NM_001004365	242894	Mm.150319	NM_001004365	ENSMUSG00000056367	Actr3b	9630005C02|ARP11|AW047569|Arp3b|Arp3beta	ARP3 actin-related protein 3B	protein-coding
Peaks_21	chr13	114406533	114406791	+	0	NA	Intergenic	Intergenic	-18568	NM_010887	17993	Mm.253142	NM_010887	ENSMUSG00000021764	Ndufs4	6720411N02Rik|C1-18k	NADH dehydrogenase (ubiquinone) Fe-S protein 4	protein-coding
Peaks_1007	chr1	44292175	44292448	+	0	NA	Intergenic	IAPEY4_I-int|LTR|ERVK	-73380	NM_207281	403183	Mm.336176	NM_207281	ENSMUSG00000046828	Mettl21e	4832428D23Rik|Gm991	methyltransferase like 21E	protein-coding
Peaks_1361	chr3	138743018	138743513	+	0	NA	intron (NM_019571, intron 1 of 7)	intron (NM_019571, intron 1 of 7)	1057	NM_019571	56224	Mm.31927	NM_019571	ENSMUSG00000028152	Tspan5	2810455A09Rik|4930505M03Rik|NET-4|Tm4sf9	tetraspanin 5	protein-coding
Peaks_589	chr1	29647350	29647590	+	0	NA	Intergenic	MERVL-int|LTR|ERVL	225982	NR_105760	102465174		NR_105760	ENSMUSG00000099257	Mir6342	Gm27268|mmu-mir-6342	microRNA 6342	ncRNA
Peaks_413	chr10	110878550	110878933	+	0	NA	intron (NR_045979, intron 2 of 2)	intron (NR_045979, intron 2 of 2)	17766	NR_045979	75630	Mm.392786	NR_045979	ENSMUSG00000101801	1700020G17Rik	4930480D05Rik	RIKEN cDNA 1700020G17 gene	ncRNA
Peaks_1290	chr9	15627746	15628230	+	0	NA	promoter-TSS (NM_181816)	promoter-TSS (NM_181816)	-55	NM_181816	234964	Mm.32237	NM_181816	ENSMUSG00000039977	Ccdc67	4933401K09Rik|Deup1	coiled-coil domain containing 67	protein-coding
Peaks_108	chr1	121621922	121622182	+	0	NA	Intergenic	MT2_Mm|LTR|ERVL	-54072	NM_025860	66942	Mm.44219	NM_025860	ENSMUSG00000001674	Ddx18	2310005B10Rik	DEAD (Asp-Glu-Ala-Asp) box polypeptide 18	protein-coding
Peaks_207	chr14	12354266	12354387	+	0	NA	Intergenic	Lx2B2|LINE|L1	-8461	NM_080433	54713	Mm.34644	NM_080433	ENSMUSG00000021743	Fezf2	AI451466|AI852056|Fez|Fezl|Zfp312	Fez family zinc finger 2	protein-coding
Peaks_839	chr1	66019811	66019928	+	0	NA	Intergenic	IAPEz-int|LTR|ERVK	93347	NM_027010	12969	Mm.275362	NM_027010	ENSMUSG00000025945	Crygf	3110001K11Rik|Cryg-2|DGcry-2|Len-2	crystallin, gamma F	protein-coding
Peaks_599	chr1	8660008	8660527	+	0	NA	intron (NM_027671, intron 10 of 20)	IAPEz-int|LTR|ERVK	639610	NM_001290390	71096	Mm.336395	NM_027671	ENSMUSG00000025909	Sntg1	4933426D16Rik|G1SYN|SYN4	syntrophin, gamma 1	protein-coding
Peaks_1336	chr2	128313045	128313153	+	0	NA	intron (NR_028589, intron 2 of 2)	intron (NR_028589, intron 2 of 2)	116252	NR_028591	100043424	Mm.297222	NR_028589		Gm14005	OTTMUSG00000015351	predicted gene 14005	ncRNA
Peaks_791	chr3	151437586	151438241	+	0	NA	promoter-TSS (NM_133222)	promoter-TSS (NM_133222)	31	NM_133222	170757	Mm.317261	NM_133222	ENSMUSG00000039167	Adgrl4	1110033N21Rik|ETL1|Eltd1|Etl	adhesion G protein-coupled receptor L4	protein-coding
Peaks_1531	chr1	131644455	131645378	+	0	NA	intron (NM_007799, intron 1 of 9)	RLTR4_MM-int|LTR|ERV1	6602	NM_007799	13034	Mm.230249	NM_007799	ENSMUSG00000004552	Ctse	A430072O03Rik|C920004C08Rik|CE|CatE	cathepsin E	protein-coding
Peaks_663	chr2	145621107	145621464	+	0	NA	intron (NM_053195, intron 15 of 16)	intron (NM_053195, intron 15 of 16)	-66303	NM_001037929	627302	Mm.445953	NM_001037929		Gm14092	OTTMUSG00000015643	predicted gene 14092	protein-coding
Peaks_1107	chr1	8700668	8700768	+	0	NA	intron (NM_027671, intron 6 of 20)	L1Md_A|LINE|L1	599159	NM_001290390	71096	Mm.336395	NM_027671	ENSMUSG00000025909	Sntg1	4933426D16Rik|G1SYN|SYN4	syntrophin, gamma 1	protein-coding
Peaks_551	chr3	82903579	82904236	+	0	NA	promoter-TSS (NR_040381)	promoter-TSS (NR_040381)	67	NM_023624	79235	Mm.33921	NM_023624	ENSMUSG00000028003	Lrat	1300010A18Rik|AI449251	lecithin-retinol acyltransferase (phosphatidylcholine-retinol-O-acyltransferase)	protein-coding
Peaks_394	chrX	75758827	75758900	+	0	NA	intron (NR_029443, intron 2 of 8)	intron (NR_029443, intron 2 of 8)	5836	NR_029443	74396	Mm.162493	NR_029443	ENSMUSG00000087396	4933407K13Rik	A130080L05Rik	RIKEN cDNA 4933407K13 gene	ncRNA
Peaks_1725	chr1	193699016	193699257	+	0	NA	Intergenic	Intergenic	-191606	NR_029592	387201		NR_029592	ENSMUSG00000065533	Mir205	Mirn205|mir-205|mmu-mir-205	microRNA 205	ncRNA
Peaks_1555	chr1	7236100	7236375	+	0	NA	Intergenic	L1Md_F2|LINE|L1	147317	NM_183028	319263	Mm.21539	NM_183028	ENSMUSG00000051285	Pcmtd1	8430411F12Rik|A030012M09Rik	protein-L-isoaspartate (D-aspartate) O-methyltransferase domain containing 1	protein-coding
Peaks_1385	chr1	47635847	47636309	+	0	NA	Intergenic	L1Md_T|LINE|L1	-168953	NR_105768	102466969		NR_105768	ENSMUSG00000098876	Mir6350	Gm27958|mmu-mir-6350	microRNA 6350	ncRNA
Peaks_370	chr4	118546997	118548405	+	0	NA	Intergenic	G-rich|Low_complexity|Low_complexity	-3975	NM_172383	230678	Mm.23639	NM_172383	ENSMUSG00000050854	Tmem125	6330530A05Rik|AV223516	transmembrane protein 125	protein-coding
Peaks_718	chr15	62470617	62471368	+	0	NA	Intergenic	Intergenic	-251541	NR_003523	67552	Mm.484027	NM_026230		H2afy3	4933432H23Rik	H2A histone family, member Y3	pseudo
Peaks_541	chr8	63951789	63952407	+	0	NA	promoter-TSS (NM_001195687)	promoter-TSS (NM_001195687)	72	NM_001195687	244495	Mm.485331	NM_001195687	ENSMUSG00000094443	Sgol2b	EG244495|Gm4975|Sgo2B	shugoshin like 2b (S. pombe)	protein-coding
Peaks_1083	chr1	166085010	166085695	+	0	NA	Intergenic	MMERVK10C-int|LTR|ERVK	42546	NM_001033344	240892	Mm.35315	NM_001033344	ENSMUSG00000026564	Dusp27	C130085G02Rik|Gm209	dual specificity phosphatase 27 (putative)	protein-coding
Peaks_1319	chr10	89685663	89686821	+	0	NA	promoter-TSS (NM_001310704)	promoter-TSS (NM_001310704)	43	NM_198021	213326	Mm.27651	NM_198021	ENSMUSG00000069539	Scyl2	AU015688|AW536445|BC030932|CVAK104|D10Ertd802e	SCY1-like 2 (S. cerevisiae)	protein-coding
Peaks_602	chr1	6434774	6435974	+	0	NA	Intergenic	IAPEz-int|LTR|ERVK	-51857	NM_001244693	240690	Mm.234612	NM_173868	ENSMUSG00000033740	St18	AV348974|Myt3|NZF-3|Nzf3|mKIAA0535	suppression of tumorigenicity 18	protein-coding
Peaks_245	chr1	115888985	115889385	+	0	NA	intron (NM_001077425, intron 1 of 23)	IAPEz-int|LTR|ERVK	204048	NM_001077425	636808	Mm.101576	NM_001077425	ENSMUSG00000070695	Cntnap5a	Caspr5-1|EG636808	contactin associated protein-like 5A	protein-coding
Peaks_1573	chr1	153202209	153202548	+	0	NA	Intergenic	Intergenic	-15931	NM_008485	16782	Mm.329272	NM_008485	ENSMUSG00000026479	Lamc2	AA589349	laminin, gamma 2	protein-coding
Peaks_873	chr2	155027581	155028014	+	0	NA	intron (NM_015770, intron 1 of 3)	intron (NM_015770, intron 1 of 3)	14227	NM_015770	50518	Mm.315593	NM_015770	ENSMUSG00000027596	a	A<y>|ASIP|ASP|As	nonagouti	protein-coding
Peaks_220	chr14	106313547	106314357	+	0	NA	Intergenic	Intergenic	172568	NR_045938	73631	Mm.48862	NR_045938	ENSMUSG00000099794	1700128A07Rik	-	RIKEN cDNA 1700128A07 gene	ncRNA
Peaks_1190	chr1	37556408	37556529	+	0	NA	Intergenic	L1Md_F2|LINE|L1	-15452	NM_173870	269181	Mm.25861	NM_173870	ENSMUSG00000026110	Mgat4a	9530018I07Rik|GnT-IVa|glcNAc-T-IVa	mannoside acetylglucosaminyltransferase 4, isoenzyme A	protein-coding
Peaks_520	chr1	35509009	35509411	+	0	NA	Intergenic	RLTR10C|LTR|ERVK	-559190	NM_015818	50785	Mm.213566	NM_015818	ENSMUSG00000045216	Hs6st1	6Ost1	heparan sulfate 6-O-sulfotransferase 1	protein-coding
Peaks_851	chr8	41217917	41218205	+	0	NA	Intergenic	RLTR20B3A_MM|LTR|ERVK	-2905	NM_145594	234199	Mm.277955	NM_145594	ENSMUSG00000031594	Fgl1	Mfire1	fibrinogen-like protein 1	protein-coding
Peaks_30	chr1	148364934	148365570	+	0	NA	Intergenic	MERVL-int|LTR|ERVL	1557187	NM_001305632	18783	Mm.4186	NM_008869	ENSMUSG00000056220	Pla2g4a	Pla2g4|cPLA2|cPLA2-alpha|cPLA2alpha	phospholipase A2, group IVA (cytosolic, calcium-dependent)	protein-coding
Peaks_1242	chr1	167826350	167826543	+	0	NA	intron (NM_033652, intron 3 of 7)	MERVL-int|LTR|ERVL	136888	NM_033652	110648	Mm.330081	NM_033652	ENSMUSG00000026686	Lmx1a	Lmx1.1|dr|dreher|sst	LIM homeobox transcription factor 1 alpha	protein-coding
Peaks_123	chr1	8027178	8027872	+	0	NA	Intergenic	RLTR10-int|LTR|ERVK	938605	NM_183028	319263	Mm.21539	NM_183028	ENSMUSG00000051285	Pcmtd1	8430411F12Rik|A030012M09Rik	protein-L-isoaspartate (D-aspartate) O-methyltransferase domain containing 1	protein-coding
Peaks_1546	chr17	94834091	94835086	+	0	NA	intron (NR_045963, intron 1 of 4)	intron (NR_045963, intron 1 of 4)	211	NR_045964	100038746	Mm.456686	NR_045963	ENSMUSG00000066057	Gm1976	100038868	predicted gene 1976	ncRNA
Peaks_1763	chr1	177322513	177323225	+	0	NA	Intergenic	CpG	-74102	NM_011785	23797	Mm.235194	NM_011785	ENSMUSG00000019699	Akt3	AI851531|D930002M15Rik|Nmf350	thymoma viral proto-oncogene 3	protein-coding
Peaks_925	chr1	44379448	44379912	+	0	NA	Intergenic	MMERVK10C-int|LTR|ERVK	-160749	NM_207281	403183	Mm.336176	NM_207281	ENSMUSG00000046828	Mettl21e	4832428D23Rik|Gm991	methyltransferase like 21E	protein-coding
Peaks_1416	chr7	20654409	20654721	+	0	NA	Intergenic	L1_Mus1|LINE|L1	-14353	NM_001166753	667530	Mm.484970	NM_001166753	ENSMUSG00000094905	Vmn1r155	EG667530|Gm8687	vomeronasal 1 receptor 155	protein-coding
Peaks_1100	chr17	36060879	36061084	+	0	NA	Intergenic	Intergenic	-2610	NM_001199967	100529082	Mm.484641	NM_001199967	ENSMUSG00000079492	Gm11127	ENSMUSG00000079492	predicted gene 11127	protein-coding
Peaks_342	chr1	10384364	10384658	+	0	NA	intron (NM_177834, intron 8 of 10)	L1Md_T|LINE|L1	-151841	NM_001102430	211673	Mm.229141	NM_001102430	ENSMUSG00000067851	Arfgef1	ARFGEP1|BIG1|D130059B05Rik|D730028O18Rik|P200	ADP-ribosylation factor guanine nucleotide-exchange factor 1(brefeldin A-inhibited)	protein-coding
Peaks_1794	chr1	188923533	188923729	+	0	NA	intron (NM_021408, intron 63 of 70)	MT2_Mm|LTR|ERVL	84209	NM_172650	226823	Mm.209880	NM_172650	ENSMUSG00000026608	Kctd3	4930438A20Rik|9330185B06|E330032J19Rik|NY-REN-45	potassium channel tetramerisation domain containing 3	protein-coding
Peaks_753	chr18	62323611	62324470	+	0	NA	promoter-TSS (NM_008313)	promoter-TSS (NM_008313)	-164	NM_008313	15562	Mm.20440	NM_008313	ENSMUSG00000026322	Htr4	5-HT-4|5-HT4|5-HT<4L>|5HTR4	5 hydroxytryptamine (serotonin) receptor 4	protein-coding
Peaks_1033	chr9	9673263	9674020	+	0	NA	intron (NM_001033359, intron 18 of 20)	intron (NM_001033359, intron 18 of 20)	-220790	NR_105745	102466147		NR_105745	ENSMUSG00000098408	Mir6237	Gm27411|mmu-mir-6237	microRNA 6237	ncRNA
Peaks_266	chr1	40701579	40701993	+	0	NA	intron (NM_001033289, intron 1 of 11)	IAPEz-int|LTR|ERVK	20074	NM_001033289	226999	Mm.256414	NM_001033289	ENSMUSG00000026062	Slc9a2	2210416H12Rik|4932415O19Rik|AV333884|NHE2	solute carrier family 9 (sodium/hydrogen exchanger), member 2	protein-coding
Peaks_779	chr15	64921738	64922651	+	0	NA	5' UTR (NM_009623, exon 1 of 18)	5' UTR (NM_009623, exon 1 of 18)	102	NM_001331075	11514	Mm.1425	NM_009623	ENSMUSG00000022376	Adcy8	AC8|AW060868	adenylate cyclase 8	protein-coding
Peaks_617	chr1	10979556	10979993	+	0	NA	Intergenic	MERVL-int|LTR|ERVL	-13691	NM_029525	109294	Mm.123247	NM_029525	ENSMUSG00000048960	Prex2	6230420N16Rik|AI316880|AI553603|C030045D06Rik|D430013K02|Depdc2|P-Rex2	phosphatidylinositol-3,4,5-trisphosphate-dependent Rac exchange factor 2	protein-coding
Peaks_1355	chr10	112876782	112877033	+	0	NA	Intergenic	Intergenic	52119	NM_001033474	382423	Mm.431239	NM_001033474	ENSMUSG00000074748	Atxn7l3b	4921506J03Rik|6230409E21Rik|AI315132|ENSMUSG00000074747	ataxin 7-like 3B	protein-coding
Peaks_1373	chr9	68935672	68935954	+	0	NA	intron (NM_013646, intron 1 of 10)	intron (NM_013646, intron 1 of 10)	170467	NR_033299	320440	Mm.483129	NM_177159		9530091C08Rik	-	RIKEN cDNA 9530091C08 gene	ncRNA
Peaks_238	chr1	10733963	10734583	+	0	NA	intron (NR_030645, intron 2 of 3)	IAPEz-int|LTR|ERVK	-14328	NM_177834	329093	Mm.336423	NM_177834	ENSMUSG00000042501	Cpa6	9030616D13Rik	carboxypeptidase A6	protein-coding
Peaks_165	chr2	175800607	175801374	+	0	NA	promoter-TSS (NM_001199308).2	promoter-TSS (NM_001199308).2	47	NM_001199308	100503353	Mm.455970	NM_001199308	ENSMUSG00000078901	Gm14440	OTTMUSG00000016618	predicted gene 14440	protein-coding
Peaks_78	chr9	3199245	3200376	+	0	NA	promoter-TSS (NR_027988)	promoter-TSS (NR_027988)	3	NR_027988	114673	Mm.422774	NM_053265	ENSMUSG00000042360	4930433N12Rik	-	RIKEN cDNA 4930433N12 gene	ncRNA
Peaks_1861	chr1	116653328	116653710	+	0	NA	Intergenic	IAPEz-int|LTR|ERVK	968382	NM_001077425	636808	Mm.101576	NM_001077425	ENSMUSG00000070695	Cntnap5a	Caspr5-1|EG636808	contactin associated protein-like 5A	protein-coding
Peaks_1804	chr3	59497172	59497482	+	0	NA	Intergenic	L1Md_A|LINE|L1	-153071	NM_001162884	242050	Mm.228086	NM_001162884	ENSMUSG00000036334	Igsf10	6530405F15Rik|9030224D03|AA409708|AA536958|AI414626|Adlican2|CMF608	immunoglobulin superfamily, member 10	protein-coding
Peaks_487	chr3	96840585	96841218	+	0	NA	intron (NM_001146001, intron 1 of 8)	(TG)n|Simple_repeat|Simple_repeat	8227	NM_001146001	59020	Mm.489677	NM_021517	ENSMUSG00000038298	Pdzk1	1700023D20Rik|2610507N21Rik|4921513F16Rik|AI267131|AI314638|AL022680|D3Ertd537e|Pdzd1|mPDZK1	PDZ domain containing 1	protein-coding
Peaks_1619	chr1	11777141	11777524	+	0	NA	intron (NM_001160369, intron 8 of 13)	L1Md_T|LINE|L1	363227	NM_001160371	320492	Mm.52021	NM_177173	ENSMUSG00000057715	A830018L16Rik	-	RIKEN cDNA A830018L16 gene	protein-coding
Peaks_958	chr5	17574407	17575090	+	0	NA	promoter-TSS (NM_013657)	promoter-TSS (NM_013657)	-68	NM_013657	20348	Mm.5071	NM_013657	ENSMUSG00000028780	Sema3c	1110036B02Rik|SemE|Semae	sema domain, immunoglobulin domain (Ig), short basic domain, secreted, (semaphorin) 3C	protein-coding
Peaks_1438	chr1	8178519	8178635	+	0	NA	Intergenic	IAPLTR2b|LTR|ERVK	1089657	NM_183028	319263	Mm.21539	NM_183028	ENSMUSG00000051285	Pcmtd1	8430411F12Rik|A030012M09Rik	protein-L-isoaspartate (D-aspartate) O-methyltransferase domain containing 1	protein-coding
Peaks_692	chrX	3356683	3357103	+	0	NA	Intergenic	RMER17C|LTR|ERVK	86797	NM_001085551	668958	Mm.443264	NM_001085551	ENSMUSG00000094558	Btbd35f11	Gm14346|OTTMUSG00000016406	BTB domain containing 35, family member 11	protein-coding
Peaks_1312	chr8	125104598	125104708	+	0	NA	intron (NM_174853, intron 3 of 11)	MTEa|LTR|ERVL-MaLR	50458	NM_174854	244667	Mm.233504	NM_170596	ENSMUSG00000043051	Disc1	-	disrupted in schizophrenia 1	protein-coding
Peaks_1420	chr1	8788923	8790148	+	0	NA	intron (NM_027671, intron 5 of 20)	IAPEz-int|LTR|ERVK	510342	NM_001290390	71096	Mm.336395	NM_027671	ENSMUSG00000025909	Sntg1	4933426D16Rik|G1SYN|SYN4	syntrophin, gamma 1	protein-coding
Peaks_1678	chr6	71227155	71227571	+	0	NA	intron (NM_009762, intron 4 of 8)	intron (NM_009762, intron 4 of 8)	27475	NM_017399	14080	Mm.22126	NM_017399	ENSMUSG00000054422	Fabp1	Fabpl|L-FABP	fatty acid binding protein 1, liver	protein-coding
Peaks_139	chr5	14905368	14905845	+	0	NA	Intergenic	Lx5c|LINE|L1	9283	NM_198666	381714	Mm.368256	NM_198666	ENSMUSG00000033219	Gm9758	ENSMUSG00000033219	predicted gene 9758	protein-coding
Peaks_636	chr10	71218276	71218509	+	0	NA	Intergenic	Intergenic	16647	NR_131003	78638	Mm.71171	NR_131003		1700113B09Rik	-	RIKEN cDNA 1700113B09 gene	ncRNA
Peaks_1775	chr1	14119535	14119956	+	0	NA	Intergenic	L1Md_T|LINE|L1	190454	NM_001310459	14048	Mm.250185	NM_010164	ENSMUSG00000025932	Eya1	bor	EYA transcriptional coactivator and phosphatase 1	protein-coding
Peaks_789	chr1	34230130	34230527	+	0	NA	intron (NM_001276764, intron 60 of 102)	intron (NM_001276764, intron 60 of 102)	69998	NM_010081	13518	Mm.336625	NM_010081	ENSMUSG00000026131	Dst	2310001O04Rik|A830042E19Rik|AW554249|BP230|BPAG1-n|Bpag|Bpag1|Macf2|ah|athetoid|dt|mKIAA0728|nmf203|nmf339	dystonin	protein-coding
Peaks_13	chr7	15159334	15160251	+	0	NA	Intergenic	Intergenic	-229059	NM_145708	246792	Mm.26391	NM_145708	ENSMUSG00000074369	Obox2	-	oocyte specific homeobox 2	protein-coding
Peaks_1325	chr1	4083790	4083932	+	0	NA	Intergenic	L1Md_A|LINE|L1	276453	NM_011283	19888	Mm.294263	NM_011283	ENSMUSG00000025900	Rp1	Dcdc3|Orp1|Rp1h|mG145	retinitis pigmentosa 1 (human)	protein-coding
Peaks_869	chr1	37279340	37279707	+	0	NA	Intergenic	IAPEz-int|LTR|ERVK	-20315	NM_030266	269180	Mm.5294	NM_030266	ENSMUSG00000026113	Inpp4a	107kDa|9630012D15|D130048C09Rik|R74740	inositol polyphosphate-4-phosphatase, type I	protein-coding
Peaks_1227	chr1	40452546	40453051	+	0	NA	intron (NM_001025602, intron 10 of 10)	L1Md_F3|LINE|L1	-12754	NM_001161842	16182	Mm.253664	NM_008365	ENSMUSG00000026070	Il18r1	Il18ralpha|Il1rrp	interleukin 18 receptor 1	protein-coding
Peaks_582	chr1	27201817	27202137	+	0	NA	Intergenic	L1Md_F2|LINE|L1	-514517	NM_001033764	210940	Mm.297614	NM_001033764	ENSMUSG00000073722	4931408C20Rik	-	RIKEN cDNA 4931408C20 gene	protein-coding
Peaks_300	chr6	77743047	77743305	+	0	NA	intron (NM_001109764, intron 4 of 19)	intron (NM_001109764, intron 4 of 19)	236491	NM_145732	12386	Mm.34637	NM_009819	ENSMUSG00000063063	Ctnna2	AI481747|Catna|Catna2|cdf|chp	catenin (cadherin associated protein), alpha 2	protein-coding
Peaks_1507	chr1	116650818	116650923	+	0	NA	Intergenic	IAPEz-int|LTR|ERVK	965733	NM_001077425	636808	Mm.101576	NM_001077425	ENSMUSG00000070695	Cntnap5a	Caspr5-1|EG636808	contactin associated protein-like 5A	protein-coding
Peaks_1645	chr1	107822834	107823501	+	0	NA	Intergenic	L1Md_T|LINE|L1	-94092	NR_102306	319596	Mm.136054	NR_102306	ENSMUSG00000100457	D830032E09Rik	-	RIKEN cDNA D830032E09 gene	ncRNA
Peaks_203	chr3	20366704	20367344	+	0	NA	intron (NM_175086, intron 1 of 1)	intron (NM_175086, intron 1 of 1)	153	NM_175086	11608	Mm.134863	NM_175086	ENSMUSG00000054988	Agtr1b	AT1B|AT2R1B|Agtr-1b|Angtr-1b	angiotensin II receptor, type 1b	protein-coding
Peaks_913	chr5	70842255	70842551	+	0	NA	5' UTR (NM_010252, exon 1 of 9)	5' UTR (NM_010252, exon 1 of 9)	214	NM_010252	14405	Mm.255292	NM_010252	ENSMUSG00000001260	Gabrg1	GabaA|GabaA/BZ	gamma-aminobutyric acid (GABA) A receptor, subunit gamma 1	protein-coding
Peaks_1046	chr2	7610161	7610410	+	0	NA	Intergenic	RLTR6B_Mm|LTR|ERV1	-214087	NM_001110231	14007	Mm.398543	NM_010160	ENSMUSG00000002107	Celf2	B230218O03|B230345P09Rik|C88023|CELF-2|CUG-BP2|Cugbp2|D230046B21Rik|Etr-3|Napor|Napor-2|mETR-3	CUGBP, Elav-like family member 2	protein-coding
Peaks_186	chr1	15080252	15080342	+	0	NA	Intergenic	RLTR10|LTR|ERVK	-161435	NM_177781	277328	Mm.186329	NM_177781	ENSMUSG00000032769	Trpa1	Anktm1|TRPA1b	transient receptor potential cation channel, subfamily A, member 1	protein-coding
Peaks_252	chr1	11888241	11888866	+	0	NA	intron (NM_001310451, intron 10 of 12)	IAPEz-int|LTR|ERVK	474448	NM_001160371	320492	Mm.52021	NM_177173	ENSMUSG00000057715	A830018L16Rik	-	RIKEN cDNA A830018L16 gene	protein-coding
Peaks_699	chr1	7608628	7609332	+	0	NA	Intergenic	IAPEz-int|LTR|ERVK	520060	NM_183028	319263	Mm.21539	NM_183028	ENSMUSG00000051285	Pcmtd1	8430411F12Rik|A030012M09Rik	protein-L-isoaspartate (D-aspartate) O-methyltransferase domain containing 1	protein-coding
Peaks_944	chr3	132949266	132950666	+	0	NA	promoter-TSS (NM_001287103)	promoter-TSS (NM_001287103)	-152	NM_001287103	114249	Mm.279310	NM_033525	ENSMUSG00000040998	Npnt	1110009H02Rik|AA682063|AI314031|Nctn|POEM	nephronectin	protein-coding
Peaks_1118	chr1	88829750	88830271	+	0	NA	Intergenic	MT2_Mm|LTR|ERVL	75120	NR_040493	78650	Mm.243767	NR_040493	ENSMUSG00000097398	Platr5	2410088K16Rik	pluripotency associated transcript 5	ncRNA
Peaks_1707	chr2	20428196	20428712	+	0	NA	intron (NM_001081006, intron 2 of 21)	MERVL-int|LTR|ERVL	-81593	NM_029895	208618	Mm.237935	NM_029895	ENSMUSG00000036617	Etl4	6620402G01Rik|9430077C05Rik|BC026657|E330027G05Rik|Etl-4|Skt	enhancer trap locus 4	protein-coding
Peaks_863	chr9	117079386	117079813	+	0	NA	intron (NM_001172122, intron 2 of 13)	intron (NM_001172122, intron 2 of 13)	172884	NM_001172123	207181	Mm.326411	NM_178660	ENSMUSG00000039607	Rbms3	6720477E09Rik|8430436O14Rik	RNA binding motif, single stranded interacting protein	protein-coding
Peaks_761	chr1	11625933	11626943	+	0	NA	intron (NM_001310451, intron 7 of 12)	L1Md_Gf|LINE|L1	212333	NM_001160371	320492	Mm.52021	NM_177173	ENSMUSG00000057715	A830018L16Rik	-	RIKEN cDNA A830018L16 gene	protein-coding
Peaks_778	chr7	125146132	125146364	+	0	NA	Intergenic	Intergenic	203538	NR_045804	71208	Mm.159465	NM_172408	ENSMUSG00000045928	4933440M02Rik	-	RIKEN cDNA 4933440M02 gene	ncRNA
Peaks_1633	chr1	64183789	64184204	+	0	NA	Intergenic	IAPEz-int|LTR|ERVK	-62607	NM_033563	93691	Mm.29466	NM_033563	ENSMUSG00000025959	Klf7	9830124P08Rik	Kruppel-like factor 7 (ubiquitous)	protein-coding
Peaks_85	chr4	147359471	147359730	+	0	NA	intron (NM_001039209, intron 1 of 2)	RLTR1D2_MM|LTR|ERV1	183734	NM_001039209	195531	Mm.270762	NM_001039209	ENSMUSG00000078496	Zfp982	Gm13152|OTTMUSG00000010671	zinc finger protein 982	protein-coding
Peaks_431	chr1	29699451	29700117	+	0	NA	Intergenic	RLTR10-int|LTR|ERVK	278296	NR_105760	102465174		NR_105760	ENSMUSG00000099257	Mir6342	Gm27268|mmu-mir-6342	microRNA 6342	ncRNA
Peaks_319	chr1	30893635	30895022	+	0	NA	Intergenic	MTA_Mm-int|LTR|ERVL-MaLR	-31072	NM_001081080	213109	Mm.194486	NM_025871	ENSMUSG00000048874	Phf3	2310061N19Rik|mKIAA0244	PHD finger protein 3	protein-coding
Peaks_280	chr1	6436101	6436521	+	0	NA	Intergenic	IAPEz-int|LTR|ERVK	-50920	NM_001244693	240690	Mm.234612	NM_173868	ENSMUSG00000033740	St18	AV348974|Myt3|NZF-3|Nzf3|mKIAA0535	suppression of tumorigenicity 18	protein-coding
Peaks_1284	chr1	49093267	49093514	+	0	NA	Intergenic	L1Md_F2|LINE|L1	-1626265	NR_105768	102466969		NR_105768	ENSMUSG00000098876	Mir6350	Gm27958|mmu-mir-6350	microRNA 6350	ncRNA
Peaks_1529	chr6	108064873	108065846	+	0	NA	intron (NM_178391, intron 1 of 1)	intron (NM_178391, intron 1 of 1)	314	NM_178391	74729	Mm.56539	NM_178391	ENSMUSG00000034639	Setmar	5830404F24Rik|Etet2	SET domain without mariner transposase fusion	protein-coding
Peaks_1745	chr11	109297877	109298343	+	0	NA	promoter-TSS (NM_011268)	promoter-TSS (NM_011268)	71	NM_001165934	19739	Mm.38548	NM_011268	ENSMUSG00000020599	Rgs9	RGS9-1|Rgs9-2	regulator of G-protein signaling 9	protein-coding
Peaks_177	chr4	61446245	61446452	+	0	NA	Intergenic	Intergenic	-6644	NM_001200004	100039150	Mm.237772	NM_001200004	ENSMUSG00000096674	Mup15	Gm2068|Mup13	major urinary protein 15	protein-coding
Peaks_1400	chr6	83530214	83530522	+	0	NA	intron (NM_009610, intron 1 of 8)	(CA)n|Simple_repeat|Simple_repeat	5883	NM_009610	11468	Mm.292865	NM_009610	ENSMUSG00000059430	Actg2	ACTA3|Act-4|Act4|SMGA	actin, gamma 2, smooth muscle, enteric	protein-coding
Peaks_99	chr1	24808555	24808738	+	0	NA	Intergenic	L1Md_F|LINE|L1	129728	NM_001310483	68421	Mm.336563	NM_026719	ENSMUSG00000073725	Lmbrd1	0910001K20Rik|AV347960	LMBR1 domain containing 1	protein-coding
Peaks_739	chr2	169617601	169618072	+	0	NA	Intergenic	(CATAC)n|Simple_repeat|Simple_repeat	-15810	NM_080455	228911	Mm.315789	NM_080455	ENSMUSG00000047907	Tshz2	2900073F20Rik|B830045G17|Mtsh2|Sdccag33l|Tsh2|Zfp218|mKIAA4248|teashirt2	teashirt zinc finger family member 2	protein-coding
Peaks_48	chr1	5431969	5432631	+	0	NA	Intergenic	L1Md_A|LINE|L1	-156193	NM_011011	18387	Mm.7977	NM_011011	ENSMUSG00000025905	Oprk1	K-OR-1|KOR|KOR-1|MSL-1|Oprk2|R21	opioid receptor, kappa 1	protein-coding
Peaks_1511	chr7	105603278	105603523	+	0	NA	Intergenic	Intergenic	-3284	NM_017371	15458	Mm.3485	NM_017371	ENSMUSG00000030895	Hpx	Hpxn|hx	hemopexin	protein-coding
Peaks_640	chr1	32066758	32068594	+	0	NA	Intergenic	Intergenic	-105130	NM_133235	170771	Mm.336594	NM_133235	ENSMUSG00000026058	Khdrbs2	6330586C16Rik|Slim1|Slm-1|Slm1|mSLM-1	KH domain containing, RNA binding, signal transduction associated 2	protein-coding
Peaks_1465	chr11	7063236	7064275	+	0	NA	exon (NM_009622, exon 1 of 20)	exon (NM_009622, exon 1 of 20)	266	NM_009622	432530	Mm.259733	NM_009622	ENSMUSG00000020431	Adcy1	AC1|D11Bwg1392e|I-AC|brl|mKIAA4070	adenylate cyclase 1	protein-coding
Peaks_428	chr6	67683490	67683834	+	0	NA	Intergenic	Intergenic	-117963	NR_003100	75070	Mm.463364	NR_003100		4930515G16Rik	-	myc induced nuclear antigen pseudogene	pseudo
Peaks_39	chr15	89841223	89842097	+	0	NA	exon (NM_018803, exon 1 of 7)	exon (NM_018803, exon 1 of 7)	200	NM_018803	54526	Mm.261601	NM_018803	ENSMUSG00000063260	Syt10	-	synaptotagmin X	protein-coding
Peaks_1225	chr1	94394223	94394569	+	0	NA	Intergenic	L1Md_A|LINE|L1	-341843	NM_008798	18566	Mm.5024	NM_008798	ENSMUSG00000026285	Pdcd1	Ly101|PD-1|Pdc1	programmed cell death 1	protein-coding
Peaks_197	chr2	87770790	87771241	+	0	NA	Intergenic	IAPEz-int|LTR|ERVK	-11521	NM_146646	258640	Mm.377607	NM_146646	ENSMUSG00000068816	Olfr152	MOR181-1|Olfr4-1|V1	olfactory receptor 152	protein-coding
Peaks_1020	chr1	158806024	158806337	+	0	NA	intron (NM_001085376, intron 13 of 21)	MTA_Mm-int|LTR|ERVL-MaLR	151258	NM_001085376	23850	Mm.458621	NM_001085376	ENSMUSG00000073530	Pappa2	PAPP-A2|PLAC3|Pappe	pappalysin 2	protein-coding
Peaks_427	chr1	5253770	5254180	+	0	NA	Intergenic	MERVL-int|LTR|ERVL	170889	NM_001310442	108664	Mm.27082	NM_133826	ENSMUSG00000033793	Atp6v1h	0710001F19Rik|AU022349|CGI-11|SFD|SFDalpha|SFDbeta|VMA13	ATPase, H+ transporting, lysosomal V1 subunit H	protein-coding
Peaks_1149	chr1	4559568	4560219	+	0	NA	Intergenic	L1Md_T|LINE|L1	-62539	NM_001289465	20671	Mm.279103	NM_011441	ENSMUSG00000025902	Sox17	-	SRY (sex determining region Y)-box 17	protein-coding
Peaks_307	chr3	145827642	145828102	+	0	NA	intron (NM_026993, intron 1 of 5)	intron (NM_026993, intron 1 of 5)	69180	NM_026993	69219	Mm.234247	NM_026993	ENSMUSG00000028194	Ddah1	2410006N07Rik|2510015N06Rik|AI987801|AW050362	dimethylarginine dimethylaminohydrolase 1	protein-coding
Peaks_807	chr1	22667392	22668601	+	0	NA	intron (NM_001012623, intron 2 of 14).2	L1Md_T|LINE|L1	137728	NM_001012625	116837	Mm.60061	NM_053270	ENSMUSG00000041670	Rims1	C030033M19Rik|RIM1|RIM1a|RIM1alpha|Rab3ip1|Rim|Serg1|mKIAA0340	regulating synaptic membrane exocytosis 1	protein-coding
Peaks_1661	chr7	15006867	15007157	+	0	NA	Intergenic	Intergenic	347304	NM_001038676	194588	Mm.389816	NM_001038676	ENSMUSG00000055942	Obox7	EG194588|Gm4745	oocyte specific homeobox 7	protein-coding

## Sheet: GFP_5k
Peaks_1	Chr	1	End	+	0	NA	NA	NA	NA	NA
Peaks_1014	chr7	59728744	59729364	+	0	NA	Intergenic	Intergenic	-2802	NR_033778	64244		NR_033778	ENSMUSG00000096475	Snord116l1	Pwcr1l1	small nucleolar RNA, C/D box 116-like 1	snoRNA
Peaks_1017	chrX	49797429	49798131	+	0	NA	promoter-TSS (NM_177591)	promoter-TSS (NM_177591)	-35	NM_177591	209268	Mm.110505	NM_177591	ENSMUSG00000031111	Igsf1	5330413N23|5530402E03|AI747649|InhBP/p120|mKIAA0364	immunoglobulin superfamily, member 1	protein-coding
Peaks_1021	chrX	162643248	162643879	+	0	NA	promoter-TSS (NM_001290633)	promoter-TSS (NM_001290633)	95	NM_001290633	194590	Mm.442441	NM_178256	ENSMUSG00000040855	Reps2	POB1	RALBP1 associated Eps domain containing protein 2	protein-coding
Peaks_1029	chr5	14978388	14978838	+	0	NA	TTS (NR_001584)	TTS (NR_001584)	286	NM_001281514	100503549	Mm.491086	NM_001281514	ENSMUSG00000072188	Gm10354	ENSMUSG00000072188	predicted gene 10354	protein-coding
Peaks_1034	chr10	93539756	93540263	+	0	NA	promoter-TSS (NM_027908)	promoter-TSS (NM_027908)	24	NM_027908	71761	Mm.244518	NM_027908	ENSMUSG00000015890	Amdhd1	1300019J08Rik	amidohydrolase domain containing 1	protein-coding
Peaks_1040	chr6	82402662	82403101	+	0	NA	5' UTR (NM_009313, exon 2 of 6)	5' UTR (NM_009313, exon 2 of 6)	406	NM_009313	21336	Mm.8055	NM_009313	ENSMUSG00000030043	Tacr1	Nk1r|Spr|Tac1r	tachykinin receptor 1	protein-coding
Peaks_1041	chrX	169036344	169037146	+	0	NA	non-coding (NR_109847, exon 1 of 15)	non-coding (NR_109847, exon 1 of 15)	134	NR_109847	11856	Mm.441810	NM_009707	ENSMUSG00000031355	Arhgap6	AI504284|RhoGAPX-1	Rho GTPase activating protein 6	protein-coding
Peaks_1042	chr4	78211452	78212399	+	0	NA	promoter-TSS (NM_011211)	promoter-TSS (NM_011211)	-30	NM_011211	19266	Mm.184021	NM_011211	ENSMUSG00000028399	Ptprd	1110002J03Rik|3000002J10Rik|B230219D21Rik|R-PTP-delta	protein tyrosine phosphatase, receptor type, D	protein-coding
Peaks_1069	chr10	29143971	29144226	+	0	NA	5' UTR (NM_026138, exon 1 of 7)	5' UTR (NM_026138, exon 1 of 7)	102	NM_026138	67412	Mm.390264	NM_026138	ENSMUSG00000038916	Soga3	6330407J23Rik	SOGA family member 3	protein-coding
Peaks_1077	chr2	180641688	180642881	+	0	NA	exon (NM_178254, exon 1 of 6)	exon (NM_178254, exon 1 of 6)	407	NM_178254	277353	Mm.473700	NM_178254	ENSMUSG00000038932	Tcfl5	AV260129|Figlb|Sosf1	transcription factor-like 5 (basic helix-loop-helix)	protein-coding
Peaks_1079	chr7	59674646	59675077	+	0	NA	intron (NR_015351, intron 2 of 5)	intron (NR_015351, intron 2 of 5)	1218	NR_002895	64243	Mm.423722	NR_002895	ENSMUSG00000096019	Snord116	MBII-85|Pwcr1	small nucleolar RNA, C/D box 116	snoRNA
Peaks_1081	chr2	66256097	66257149	+	0	NA	promoter-TSS (NM_001290669)	promoter-TSS (NM_001290669)	-6	NM_001290669	73668	Mm.250868	NM_001047604	ENSMUSG00000034848	Ttc21b	2410066K11Rik|Thm1|aln|mKIAA1992	tetratricopeptide repeat domain 21B	protein-coding
Peaks_1090	chr7	100012558	100012745	+	0	NA	intron (NM_001291320, intron 1 of 10)	intron (NM_001291320, intron 1 of 10)	2733	NM_001291320	69121	Mm.285295	NM_133709	ENSMUSG00000030732	Chrdl2	1810022C01Rik|Chl2	chordin-like 2	protein-coding
Peaks_1096	chrX	29976099	29976754	+	0	NA	intron (NM_001099347, intron 1 of 8).12	intron (NM_001099347, intron 1 of 8).12	112	NM_001109969	100039240	Mm.483167	NM_001109969	ENSMUSG00000095293	Gm10058	ENSMUSG00000059047	predicted gene 10058	protein-coding
Peaks_1100	chr17	36060879	36061084	+	0	NA	Intergenic	Intergenic	-2610	NM_001199967	100529082	Mm.484641	NM_001199967	ENSMUSG00000079492	Gm11127	ENSMUSG00000079492	predicted gene 11127	protein-coding
Peaks_1111	chr1	16622144	16622464	+	0	NA	Intergenic	MT2_Mm|LTR|ERVL	-2966	NM_001271017	66799	Mm.122430	NM_025773	ENSMUSG00000025939	Ube2w	6130401J04Rik	ubiquitin-conjugating enzyme E2W (putative)	protein-coding
Peaks_1112	chr8	104509117	104510278	+	0	NA	intron (NM_180958, intron 1 of 19)	CpG-14407	190	NM_180958	320022	Mm.249775	NM_180958	ENSMUSG00000052616	Terb1	4930532D21Rik|BB085179|Ccdc79	telomere repeat binding bouquet formation protein 1	protein-coding
Peaks_1122	chr4	53439894	53441107	+	0	NA	promoter-TSS (NM_001159633)	promoter-TSS (NM_001159633)	87	NM_133891	100434	Mm.482207	NM_133891	ENSMUSG00000028412	Slc44a1	2210409B22Rik|4833416H08Rik|AW547365|CHTL1|CTL1|Cdw92	solute carrier family 44, member 1	protein-coding
Peaks_1127	chr10	22158252	22158907	+	0	NA	promoter-TSS (NM_009016)	promoter-TSS (NM_009016)	-30	NM_009016	19368	Mm.458004	NM_009016		Raet1a	RAE-1alpha|Rae1alpha|Raet1	retinoic acid early transcript 1, alpha	protein-coding
Peaks_1137	chr1	87466165	87466446	+	0	NA	Intergenic	IAPEz-int|LTR|ERVK	-3959	NM_028473	73234	Mm.7310	NM_028473	ENSMUSG00000026258	3110079O15Rik	Snorc	RIKEN cDNA 3110079O15 gene	protein-coding
Peaks_1159	chr10	121740547	121740649	+	0	NA	intron (NM_173022, intron 1 of 2)	intron (NM_173022, intron 1 of 2)	661	NM_173022	270802	Mm.209172	NM_173022	ENSMUSG00000053684	BC048403	E030027L10	cDNA sequence BC048403	protein-coding
Peaks_1163	chr9	78615385	78616089	+	0	NA	5' UTR (NM_153098, exon 1 of 33)	5' UTR (NM_153098, exon 1 of 33)	191	NM_153098	235505	Mm.32955	NM_153098	ENSMUSG00000046186	Cd109	9930012E15Rik|AI480638|GARP	CD109 antigen	protein-coding
Peaks_1170	chr15	34837234	34837839	+	0	NA	promoter-TSS (NM_001271704)	promoter-TSS (NM_001271704)	181	NM_181317	16539	Mm.71045	NM_181317	ENSMUSG00000050963	Kcns2	E130006J24Rik|Kv9.2	K+ voltage-gated channel, subfamily S, 2	protein-coding
Peaks_1172	chr4	156059811	156060041	+	0	NA	promoter-TSS (NR_132444)	promoter-TSS (NR_132444)	-124	NR_132444	100415901	Mm.437006	NR_132444	ENSMUSG00000086549	Gm13648	OTTMUSG00000013217	predicted gene 13648	ncRNA
Peaks_1178	chr10	24835969	24836242	+	0	NA	promoter-TSS (NM_134005)	promoter-TSS (NM_134005)	90	NM_134005	209558	Mm.338425	NM_134005	ENSMUSG00000019989	Enpp3	AI876438|CD203c	ectonucleotide pyrophosphatase/phosphodiesterase 3	protein-coding
Peaks_1179	chr5	15933985	15935606	+	0	NA	5' UTR (NM_001110843, exon 1 of 39)	5' UTR (NM_001110843, exon 1 of 39)	104	NM_001110844	12293	Mm.159842	NM_009784	ENSMUSG00000040118	Cacna2d1	Ca(v)alpha2delta1|Cacna2|Cchl2a	calcium channel, voltage-dependent, alpha2/delta subunit 1	protein-coding
Peaks_1194	chr5	7344056	7345405	+	0	NA	promoter-TSS (NM_001163223)	promoter-TSS (NM_001163223)	-352	NM_001163223	207618	Mm.478808	NM_001163223	ENSMUSG00000092094	Zfp804b	Gm441	zinc finger protein 804B	protein-coding
Peaks_1209	chr4	108406230	108406942	+	0	NA	exon (NM_024198, exon 1 of 3)	exon (NM_024198, exon 1 of 3)	127	NM_024198	67305	Mm.20164	NM_024198	ENSMUSG00000028597	Gpx7	3110050F08Rik|AI327032|GPX6	glutathione peroxidase 7	protein-coding
Peaks_1215	chr3	116251463	116252925	+	0	NA	exon (NM_022427, exon 2 of 2)	exon (NM_022427, exon 2 of 2)	1290	NM_022427	64378	Mm.40025	NM_022427	ENSMUSG00000068696	Gpr88	AW061286|Strg	G-protein coupled receptor 88	protein-coding
Peaks_1228	chr10	103368982	103369500	+	0	NA	intron (NM_001252330, intron 1 of 11)	intron (NM_001252330, intron 1 of 11)	1433	NM_175328	103098	Mm.458408	NM_175328	ENSMUSG00000019894	Slc6a15	AA536730|AI326450|AI326451|v7-3	solute carrier family 6 (neurotransmitter transporter), member 15	protein-coding
Peaks_1231	chr8	66696771	66697456	+	0	NA	promoter-TSS (NM_010934)	promoter-TSS (NM_010934)	-309	NM_010934	18166	Mm.5112	NM_010934	ENSMUSG00000036437	Npy1r	Npyr|Y1-R	neuropeptide Y receptor Y1	protein-coding
Peaks_1234	chr11	12464333	12465246	+	0	NA	5' UTR (NM_001282993, exon 1 of 14)	5' UTR (NM_001282993, exon 1 of 14)	171	NM_172496	12808	Mm.22847	NM_172496	ENSMUSG00000020173	Cobl	-	cordon-bleu WH2 repeat	protein-coding
Peaks_1235	chr1	64961472	64961938	+	0	NA	Intergenic	IAPEz-int|LTR|ERVK	-4881	NM_001039493	241075	Mm.239534	NM_175509	ENSMUSG00000051344	Plekhm3	9430067K14Rik|A230102O09Rik|AI449570|DAPR|Plekhm1l	pleckstrin homology domain containing, family M, member 3	protein-coding
Peaks_1244	chr14	104467311	104468250	+	0	NA	5' UTR (NM_011143, exon 1 of 3)	5' UTR (NM_011143, exon 1 of 3)	219	NM_011143	18996	Mm.246550	NM_011143	ENSMUSG00000048349	Pou4f1	Brn-3|Brn-3.0|Brn3|Brn3.0|Brn3a|E130119J07Rik	POU domain, class 4, transcription factor 1	protein-coding
Peaks_1253	chr7	102222275	102222604	+	0	NA	promoter-TSS (NM_145583)	promoter-TSS (NM_145583)	-589	NR_111938	233575	Mm.302013	NM_145583	ENSMUSG00000030990	Pgap2	1810006G21Rik|C76649|Frag1	post-GPI attachment to proteins 2	protein-coding
Peaks_1255	chr3	116507664	116508357	+	0	NA	5' UTR (NM_025517, exon 1 of 11)	5' UTR (NM_025517, exon 1 of 11)	165	NM_025517	66368	Mm.251228	NM_025517	ENSMUSG00000000339	Rtca	2310009A18Rik|AI450277|RPC|Rtcd1	RNA 3'-terminal phosphate cyclase	protein-coding
Peaks_1256	chr15	40654602	40655747	+	0	NA	5' UTR (NM_011766, exon 1 of 8)	5' UTR (NM_011766, exon 1 of 8)	132	NM_011766	22762	Mm.39496	NM_011766	ENSMUSG00000022306	Zfpm2	B330005D23Rik|FOG-2|FOG2	zinc finger protein, multitype 2	protein-coding
Peaks_1266	chr5	14940479	14941168	+	0	NA	Intergenic	Intergenic	-2348	NM_001122661	624245	Mm.368256	NM_001122661	ENSMUSG00000091255	Speer4e	-	spermatogenesis associated glutamate (E)-rich protein 4e	protein-coding
Peaks_1267	chr16	78930629	78931601	+	0	NA	5' UTR (NM_139134, exon 1 of 6)	5' UTR (NM_139134, exon 1 of 6)	167	NM_139134	246048	Mm.77895	NM_139134	ENSMUSG00000022860	Chodl	3110074E07Rik|MT75|PRED12	chondrolectin	protein-coding
Peaks_1275	chr6	47749166	47749327	+	0	NA	Intergenic	CpG	3679	NR_002841	19799		NR_002841		Rn4.5s	-	4.5S RNA	rRNA
Peaks_1281	chr16	5132318	5132664	+	0	NA	promoter-TSS (NM_008909)	promoter-TSS (NM_008909)	-10	NM_008909	19041	Mm.266875	NM_008909	ENSMUSG00000039457	Ppl	AW553870	periplakin	protein-coding
Peaks_1290	chr9	15627746	15628230	+	0	NA	promoter-TSS (NM_181816)	promoter-TSS (NM_181816)	-55	NM_181816	234964	Mm.32237	NM_181816	ENSMUSG00000039977	Ccdc67	4933401K09Rik|Deup1	coiled-coil domain containing 67	protein-coding
Peaks_1293	chr12	116404968	116406054	+	0	NA	promoter-TSS (NR_028421)	promoter-TSS (NR_028421)	109	NM_133762	76044	Mm.491196	NM_133762	ENSMUSG00000042029	Ncapg2	5830426I05Rik|Luzp5|Mtb|mCAP-G2	non-SMC condensin II complex, subunit G2	protein-coding
Peaks_1295	chr1	16621988	16622090	+	0	NA	Intergenic	MT2_Mm|LTR|ERVL	-2701	NM_001271017	66799	Mm.122430	NM_025773	ENSMUSG00000025939	Ube2w	6130401J04Rik	ubiquitin-conjugating enzyme E2W (putative)	protein-coding
Peaks_1297	chr3	80913129	80913870	+	0	NA	intron (NM_001345959, intron 1 of 10)	CpG	161	NM_001345956	14658	Mm.275639	NM_010298	ENSMUSG00000028020	Glrb	AI853901|Glyrb|spa|spastic	glycine receptor, beta subunit	protein-coding
Peaks_1308	chr1	121327193	121327539	+	0	NA	intron (NM_178082, intron 1 of 5)	intron (NM_178082, intron 1 of 5)	312	NM_001271531	72999	Mm.27136	NM_133748	ENSMUSG00000003721	Insig2	2900053I11Rik|C730043J18Rik|Insig-2	insulin induced gene 2	protein-coding
Peaks_1309	chr8	20367376	20367740	+	0	NA	Intergenic	Intergenic	-4356	NM_001177408	100040599	Mm.491087	NM_001177408	ENSMUSG00000074449	Gm15319	OTTMUSG00000020118	predicted gene 15319	protein-coding
Peaks_1319	chr10	89685663	89686821	+	0	NA	promoter-TSS (NM_001310704)	promoter-TSS (NM_001310704)	43	NM_198021	213326	Mm.27651	NM_198021	ENSMUSG00000069539	Scyl2	AU015688|AW536445|BC030932|CVAK104|D10Ertd802e	SCY1-like 2 (S. cerevisiae)	protein-coding
Peaks_1329	chr7	140967843	140968181	+	0	NA	promoter-TSS (NM_001112715)	promoter-TSS (NM_001112715)	-64	NM_001112715	68713	Mm.175661	NM_026820	ENSMUSG00000025491	Ifitm1	1110036C17Rik|DSPA2a|Mil-2|Mil2	interferon induced transmembrane protein 1	protein-coding
Peaks_1339	chr11	101278746	101279152	+	0	NA	promoter-TSS (NM_026618)	promoter-TSS (NM_026618)	-1	NM_026618	52469	Mm.52	NM_026618	ENSMUSG00000017188	Coa3	1810033A19Rik|Ccdc56|D11Ertd99e|HSPC009	cytochrome C oxidase assembly factor 3	protein-coding
Peaks_134	chr1	55926436	55926637	+	0	NA	Intergenic	MERVL-int|LTR|ERVL	-4705	NR_045837	329159	Mm.98697	NR_045837	ENSMUSG00000099950	9130227L01Rik	-	RIKEN cDNA 9130227L01 gene	ncRNA
Peaks_1340	chrX	16618187	16619245	+	0	NA	promoter-TSS (NM_173740)	promoter-TSS (NM_173740)	-982	NM_173740	17161	Mm.21108	NM_173740	ENSMUSG00000025037	Maoa	1110061B18Rik|AA407771	monoamine oxidase A	protein-coding
Peaks_1353	chr3	116861214	116861387	+	0	NA	promoter-TSS (NM_009146)	promoter-TSS (NM_009146)	-380	NM_009146	20321	Mm.66293	NM_009146	ENSMUSG00000033386	Frrs1	AI131732|Sdfr2	ferric-chelate reductase 1	protein-coding
Peaks_1361	chr3	138743018	138743513	+	0	NA	intron (NM_019571, intron 1 of 7)	intron (NM_019571, intron 1 of 7)	1057	NM_019571	56224	Mm.31927	NM_019571	ENSMUSG00000028152	Tspan5	2810455A09Rik|4930505M03Rik|NET-4|Tm4sf9	tetraspanin 5	protein-coding
Peaks_1375	chr4	115000441	115000752	+	0	NA	intron (NM_001304559, intron 1 of 15)	intron (NM_001304559, intron 1 of 15)	478	NM_001304555	20460	Mm.3988	NM_009185	ENSMUSG00000028718	Stil	Sil	Scl/Tal1 interrupting locus	protein-coding
Peaks_1376	chr8	12915421	12915863	+	0	NA	promoter-TSS (NM_178076)	promoter-TSS (NM_178076)	-251	NM_178076	17207	Mm.334413	NM_178076	ENSMUSG00000031442	Mcf2l	C130040G20Rik|Dbs|Ost|mKIAA0362	mcf.2 transforming sequence-like	protein-coding
Peaks_1382	chr1	160351757	160352332	+	0	NA	promoter-TSS (NM_001038621)	promoter-TSS (NM_001038621)	-473	NM_001038621	29809	Mm.25833	NM_013862	ENSMUSG00000026721	Rabgap1l	5830411O09Rik|8430421H08Rik|9630005B12Rik|AW049894|HHL|Hh1|mKIAA0471	RAB GTPase activating protein 1-like	protein-coding
Peaks_1386	chr4	114405728	114407142	+	0	NA	promoter-TSS (NM_001085549)	promoter-TSS (NM_001085549)	-289	NM_001085549	666048	Mm.331779	NM_001085549	ENSMUSG00000070867	Trabd2b	Gm12824|Hkat|OTTMUSG00000008561	TraB domain containing 2B	protein-coding
Peaks_1395	chr2	66123946	66125360	+	0	NA	5' UTR (NM_015736, exon 1 of 11)	5' UTR (NM_015736, exon 1 of 11)	140	NM_015736	14425	Mm.439760	NM_015736	ENSMUSG00000026994	Galnt3	-	UDP-N-acetyl-alpha-D-galactosamine:polypeptide N-acetylgalactosaminyltransferase 3	protein-coding
Peaks_1411	chr2	133554290	133554981	+	0	NA	exon (NM_007553, exon 2 of 3)	exon (NM_007553, exon 2 of 3)	2476	NM_007553	12156	Mm.103205	NM_007553	ENSMUSG00000027358	Bmp2	AI467020|Bmp2a	bone morphogenetic protein 2	protein-coding
Peaks_1426	chr14	76010487	76011170	+	0	NA	promoter-TSS (NM_026816)	promoter-TSS (NM_026816)	37	NM_026816	68705	Mm.20415	NM_026816	ENSMUSG00000067995	Gtf2f2	1110031C13Rik|AI326315	general transcription factor IIF, polypeptide 2	protein-coding
Peaks_1436	chr17	90454430	90456169	+	0	NA	5' UTR (NM_001346961, exon 1 of 6)	5' UTR (NM_001346961, exon 1 of 6)	581	NM_001346958	18189	Mm.478418	NM_020252	ENSMUSG00000024109	Nrxn1	1700062G21Rik|9330127H16Rik|A230068P09Rik|mKIAA0578	neurexin I	protein-coding
Peaks_1439	chr19	33761279	33761937	+	0	NA	5' UTR (NM_001322338, exon 1 of 11)	5' UTR (NM_001322338, exon 1 of 11)	343	NM_001322338	101055671		NM_001322338	ENSMUSG00000087303	Lipo2	EG668114|Gm8981	lipase, member O2	protein-coding
Peaks_1449	chr12	55124288	55125135	+	0	NA	exon (NM_028527, exon 1 of 5)	exon (NM_028527, exon 1 of 5)	183	NM_028527	73385	Mm.439875	NM_028527	ENSMUSG00000095595	Fam177a	1700047I17Rik|1700047I17Rik1|C14orf24|D730001C10Rik|Fam177a1	family with sequence similarity 177, member A	protein-coding
Peaks_1457	chr15	96185513	96185852	+	0	NA	intron (NR_028311, intron 1 of 1)	intron (NR_028311, intron 1 of 1)	2882	NR_028311	100043335	Mm.247464	NR_028311		Gm4371	EG667874|Gm8854	eukaryotic translation initiation factor 3, subunit I pseudogene	pseudo
Peaks_1459	chr3	123446729	123447839	+	0	NA	exon (NM_008939, exon 1 of 11)	exon (NM_008939, exon 1 of 11)	371	NM_008939	19142	Mm.9431	NM_008939	ENSMUSG00000027978	Prss12	Bssp-3|motopsin	protease, serine 12 neurotrypsin (motopsin)	protein-coding
Peaks_1461	chr3	152165269	152166350	+	0	NA	promoter-TSS (NM_016867)	promoter-TSS (NM_016867)	91	NM_016867	54120	Mm.97	NM_016867	ENSMUSG00000039131	Gipc2	2200002N01Rik|AU021850|Semcap2	GIPC PDZ domain containing family, member 2	protein-coding
Peaks_1462	chr3	125403691	125404512	+	0	NA	promoter-TSS (NM_022565)	promoter-TSS (NM_022565)	10	NM_022565	64580	Mm.444289	NM_022565	ENSMUSG00000027971	Ndst4	4930439H17Rik	N-deacetylase/N-sulfotransferase (heparin glucosaminyl) 4	protein-coding
Peaks_1465	chr11	7063236	7064275	+	0	NA	exon (NM_009622, exon 1 of 20)	exon (NM_009622, exon 1 of 20)	266	NM_009622	432530	Mm.259733	NM_009622	ENSMUSG00000020431	Adcy1	AC1|D11Bwg1392e|I-AC|brl|mKIAA4070	adenylate cyclase 1	protein-coding
Peaks_1480	chr6	148354509	148355024	+	0	NA	non-coding (NR_003634, exon 1 of 1)	non-coding (NR_003634, exon 1 of 1)	110	NR_003634	66184	Mm.391542	NM_025405	ENSMUSG00000063171	Rps4l	1110033J19Rik|AA407494|Rps4y2	ribosomal protein S4-like	pseudo
Peaks_1481	chr6	36387976	36389502	+	0	NA	promoter-TSS (NR_015589)	promoter-TSS (NR_015589)	-505	NR_015589	319472	Mm.226434	NR_015589	ENSMUSG00000073154	9330158H04Rik	-	RIKEN cDNA 9330158H04 gene	ncRNA
Peaks_1487	chr8	114205136	114206110	+	0	NA	promoter-TSS (NM_173016)	promoter-TSS (NM_173016)	-17	NM_173016	270097	Mm.334825	NM_173016	ENSMUSG00000046844	Vat1l	9430073I07|AI427515|mKIAA1576	vesicle amine transport protein 1 like	protein-coding
Peaks_1488	chr2	115513726	115514229	+	0	NA	Intergenic	Intergenic	-1776	NR_030712	100043232	Mm.240112	NR_030712	ENSMUSG00000085582	3110099E03Rik	-	RIKEN cDNA 3110099E03 gene	ncRNA
Peaks_1491	chr4	45184371	45185606	+	0	NA	promoter-TSS (NM_001081172)	promoter-TSS (NM_001081172)	82	NM_001081172	666060	Mm.24783	NM_001081172	ENSMUSG00000035615	Frmpd1	BC031840|mKIAA0967	FERM and PDZ domain containing 1	protein-coding
Peaks_1499	chr18	89768796	89770131	+	0	NA	promoter-TSS (NM_001039173)	promoter-TSS (NM_001039173)	-327	NM_001039173	623279	Mm.447164	NM_001039173	ENSMUSG00000073514	Dok6	Dok-6	docking protein 6	protein-coding
Peaks_1508	chr3	28262543	28263622	+	0	NA	promoter-TSS (NM_001163009)	promoter-TSS (NM_001163009)	-132	NM_001163007	665113	Mm.126193	NM_026910	ENSMUSG00000027692	Tnik	1500031A17Rik|4831440I19Rik|AI451411|C530008O15Rik|C630040K21Rik	TRAF2 and NCK interacting kinase	protein-coding
Peaks_1511	chr7	105603278	105603523	+	0	NA	Intergenic	Intergenic	-3284	NM_017371	15458	Mm.3485	NM_017371	ENSMUSG00000030895	Hpx	Hpxn|hx	hemopexin	protein-coding
Peaks_1514	chr15	78842351	78843186	+	0	NA	intron (NM_027219, intron 1 of 2)	CpG	121	NM_027219	104445	Mm.307488	NM_027219	ENSMUSG00000049521	Cdc42ep1	1810058K22Rik|AA980734|Borg5|CEP1|MSE55	CDC42 effector protein (Rho GTPase binding) 1	protein-coding
Peaks_1516	chr12	38780027	38780565	+	0	NA	5' UTR (NM_007960, exon 1 of 13)	5' UTR (NM_007960, exon 1 of 13)	214	NM_007960	14009	Mm.4866	NM_007960	ENSMUSG00000004151	Etv1	ER81|Etsrp81	ets variant 1	protein-coding
Peaks_1517	chr1	171063786	171066197	+	0	NA	promoter-TSS (NR_106103)	promoter-TSS (NR_106103)	-339	NR_106103	102466998		NR_106103	ENSMUSG00000099119	Mir6546	Gm27408|mmu-mir-6546	microRNA 6546	ncRNA
Peaks_1519	chr15	42676152	42676511	+	0	NA	exon (NM_001286062, exon 1 of 9)	exon (NM_001286062, exon 1 of 9)	646	NM_001286062	11600	Mm.309336	NM_009640	ENSMUSG00000022309	Angpt1	1110046O21Rik|Ang-1|Ang1	angiopoietin 1	protein-coding
Peaks_1521	chr10	41071435	41072365	+	0	NA	promoter-TSS (NM_199058)	promoter-TSS (NM_199058)	-316	NM_199058	140741	Mm.290693	NM_199058	ENSMUSG00000046922	Gpr6	AI852874|Gm233	G protein-coupled receptor 6	protein-coding
Peaks_1524	chr5	141240823	141242068	+	0	NA	promoter-TSS (NM_177879)	promoter-TSS (NM_177879)	-89	NM_177879	330222	Mm.151931	NM_177879	ENSMUSG00000039683	Sdk1	5330440E10|6720466O15Rik	sidekick cell adhesion molecule 1	protein-coding
Peaks_1529	chr6	108064873	108065846	+	0	NA	intron (NM_178391, intron 1 of 1)	intron (NM_178391, intron 1 of 1)	314	NM_178391	74729	Mm.56539	NM_178391	ENSMUSG00000034639	Setmar	5830404F24Rik|Etet2	SET domain without mariner transposase fusion	protein-coding
Peaks_153	chr6	61179895	61181045	+	0	NA	5' UTR (NM_183310, exon 1 of 11)	5' UTR (NM_183310, exon 1 of 11)	145	NM_183310	232035	Mm.150324	NM_183310	ENSMUSG00000039578	Ccser1	6230405M12Rik|C130092O11Rik|Fam190a	coiled-coil serine rich 1	protein-coding
Peaks_1546	chr17	94834091	94835086	+	0	NA	intron (NR_045963, intron 1 of 4)	intron (NR_045963, intron 1 of 4)	211	NR_045964	100038746	Mm.456686	NR_045963	ENSMUSG00000066057	Gm1976	100038868	predicted gene 1976	ncRNA
Peaks_1559	chr4	136424457	136425217	+	0	NA	intron (NM_001285484, intron 1 of 1)	CpG	225	NM_001285484	15552	Mm.40573	NM_008309	ENSMUSG00000070687	Htr1d	5-HT-1D|5-HT1D|AI853647|Gpcr14|Htr1db	5-hydroxytryptamine (serotonin) receptor 1D	protein-coding
Peaks_1561	chr17	33780997	33781515	+	0	NA	exon (NM_020581, exon 1 of 7)	exon (NM_020581, exon 1 of 7)	319	NM_020581	57875	Mm.196189	NM_020581	ENSMUSG00000002289	Angptl4	Arp4|Bk89|Fiaf|Hfarp|Ng27|Pgar|Pgarg|Pp1158	angiopoietin-like 4	protein-coding
Peaks_1571	chr7	4119428	4119781	+	0	NA	promoter-TSS (NM_001109765)	promoter-TSS (NM_001109765)	74	NM_001001454	57776	Mm.29729	NM_021324	ENSMUSG00000030428	Ttyh1	4930459B04Rik|6330408P11Rik|TTY1|mTTY1|tty	tweety family member 1	protein-coding
Peaks_1574	chr6	142386773	142387814	+	0	NA	promoter-TSS (NM_001204907)	promoter-TSS (NM_001204907)	50	NM_025872	66964	Mm.3676	NM_025872	ENSMUSG00000030245	Golt1b	2310061A22Rik|AA407874|AU024291|CGI-141	golgi transport 1B	protein-coding
Peaks_1578	chr17	40880004	40880742	+	0	NA	exon (NM_027834, exon 1 of 2)	exon (NM_027834, exon 1 of 2)	185	NM_027834	71583	Mm.158733	NM_027834	ENSMUSG00000054951	9130008F23Rik	-	RIKEN cDNA 9130008F23 gene	protein-coding
Peaks_1579	chr8	110726997	110727204	+	0	NA	intron (NM_001310591, intron 3 of 13)	intron (NM_001310591, intron 3 of 13)	1374	NM_001310591	244654	Mm.490385	NM_198625	ENSMUSG00000033763	Mtss1l	ABBA	metastasis suppressor 1-like	protein-coding
Peaks_1581	chr16	33829385	33830339	+	0	NA	5' UTR (NM_001145884, exon 1 of 15)	5' UTR (NM_001145884, exon 1 of 15)	197	NM_001145884	16419	Mm.6424	NM_010580	ENSMUSG00000022817	Itgb5	AA475909|AI874634|ESTM23|[b]-5|[b]5|[b]5A|[b]5B|beta-5|beta5	integrin beta 5	protein-coding
Peaks_1585	chr14	6756301	6757581	+	0	NA	intron (NM_001309401, intron 1 of 4)	CpG	116	NM_001309401	100041151	Mm.396155	NM_001309401	ENSMUSG00000091754	Gm3636	100042043	predicted gene 3636	protein-coding
Peaks_1596	chr12	72664245	72664328	+	0	NA	intron (NM_025522, intron 1 of 6)	intron (NM_025522, intron 1 of 6)	542	NM_025522	66375	Mm.289653	NM_025522	ENSMUSG00000021094	Dhrs7	2310016E22Rik|5730564L20Rik|AW061210|Retdsr4|Retsdr4	dehydrogenase/reductase (SDR family) member 7	protein-coding
Peaks_1599	chr14	48120621	48121862	+	0	NA	intron (NM_033602, intron 1 of 5)	CpG	372	NM_033602	93834	Mm.296457	NM_033602	ENSMUSG00000021846	Peli2	AW047589|BB129927	pellino 2	protein-coding
Peaks_1602	chr5	14918693	14919241	+	0	NA	Intergenic	ORR1A1-int|LTR|ERVL-MaLR	-4078	NM_198666	381714	Mm.368256	NM_198666	ENSMUSG00000033219	Gm9758	ENSMUSG00000033219	predicted gene 9758	protein-coding
Peaks_1605	chr10	78752366	78753165	+	0	NA	exon (NM_027630, exon 1 of 7)	exon (NM_027630, exon 1 of 7)	302	NM_027630	70976	Mm.188505	NM_027630	ENSMUSG00000078442	Ccdc105	4931413A09Rik	coiled-coil domain containing 105	protein-coding
Peaks_161	chr6	8755873	8756102	+	0	NA	intron (NM_001252266, intron 1 of 11)	intron (NM_001252266, intron 1 of 11)	2471	NM_001252266	15893	Mm.275683	NM_010492	ENSMUSG00000062995	Ica1	69kDa|ICA69	islet cell autoantigen 1	protein-coding
Peaks_1613	chr5	12383071	12384090	+	0	NA	5' UTR (NM_028882, exon 1 of 18)	5' UTR (NM_028882, exon 1 of 18)	414	NM_028882	108151	Mm.89313	NM_028882	ENSMUSG00000040254	Sema3d	4631426B19Rik	sema domain, immunoglobulin domain (Ig), short basic domain, secreted, (semaphorin) 3D	protein-coding
Peaks_162	chr7	59722805	59723015	+	0	NA	Intergenic	Intergenic	3342	NR_002895	64243	Mm.423722	NR_002895	ENSMUSG00000096019	Snord116	MBII-85|Pwcr1	small nucleolar RNA, C/D box 116	snoRNA
Peaks_1622	chr8	64205247	64206061	+	0	NA	5' UTR (NM_009390, exon 1 of 21)	5' UTR (NM_009390, exon 1 of 21)	339	NM_009390	21892	Mm.418367	NM_009390	ENSMUSG00000053626	Tll1	Tll|Tll-1	tolloid-like	protein-coding
Peaks_1628	chr4	121097699	121098335	+	0	NA	5' UTR (NM_172700, exon 1 of 10)	5' UTR (NM_172700, exon 1 of 10)	226	NM_172700	230709	Mm.34399	NM_172700	ENSMUSG00000043207	Zmpste24	A530043O15Rik|D030046F19|FACE1|Face-1|MADB|STE24|Ste24p	zinc metallopeptidase, STE24	protein-coding
Peaks_1639	chr17	43801570	43802358	+	0	NA	5' UTR (NM_207649, exon 1 of 5)	5' UTR (NM_207649, exon 1 of 5)	113	NM_207649	53901	Mm.251242	NM_030598	ENSMUSG00000039601	Rcan2	Csp2|Dscr1l1|MCIP2|ZAKI-4	regulator of calcineurin 2	protein-coding
Peaks_1640	chr17	13550654	13551690	+	0	NA	intron (NR_045436, intron 1 of 4)	(CTGTG)n|Simple_repeat|Simple_repeat	2922	NR_045436	72578	Mm.46549	NR_045436	ENSMUSG00000038347	2700054A10Rik	-	RIKEN cDNA 2700054A10 gene	ncRNA
Peaks_165	chr2	175800607	175801374	+	0	NA	promoter-TSS (NM_001199308).2	promoter-TSS (NM_001199308).2	47	NM_001199308	100503353	Mm.455970	NM_001199308	ENSMUSG00000078901	Gm14440	OTTMUSG00000016618	predicted gene 14440	protein-coding
Peaks_1650	chr4	145463622	145464374	+	0	NA	promoter-TSS (NR_002888)	promoter-TSS (NR_002888)	-212	NR_002888	545700	Mm.389595	NR_002888	ENSMUSG00000052912	Smarca5-ps	9230115A19Rik|OTTMUSG00000011029	SWI/SNF related, matrix associated, actin depenent ragulator of chromatin, subfamily a, member 5, pseudogene	pseudo
Peaks_1651	chr7	38183004	38184259	+	0	NA	promoter-TSS (NM_028166)	promoter-TSS (NM_028166)	-156	NM_028166	72244	Mm.187554	NM_028166		1600014C10Rik	AI428873	RIKEN cDNA 1600014C10 gene	protein-coding
Peaks_1666	chr2	140395001	140396276	+	0	NA	5' UTR (NM_028387, exon 1 of 4)	5' UTR (NM_028387, exon 1 of 4)	203	NM_028387	72899	Mm.229466	NM_028387	ENSMUSG00000068205	Macrod2	1110033L15Rik|2610107G07Rik|2900006F19Rik	MACRO domain containing 2	protein-coding
Peaks_1673	chr13	52980307	52981459	+	0	NA	5' UTR (NM_017373, exon 1 of 2)	5' UTR (NM_017373, exon 1 of 2)	156	NM_017373	18030	Mm.136604	NM_017373	ENSMUSG00000056749	Nfil3	AV225605|E4BP4	nuclear factor, interleukin 3, regulated	protein-coding
Peaks_1686	chr1	171066600	171066845	+	0	NA	Intergenic	Intergenic	-2070	NR_106103	102466998		NR_106103	ENSMUSG00000099119	Mir6546	Gm27408|mmu-mir-6546	microRNA 6546	ncRNA
Peaks_1688	chr8	3567711	3568148	+	0	NA	promoter-TSS (NM_001024728)	promoter-TSS (NM_001024728)	-69	NM_001024728	546049	Mm.358733	NM_001024728	ENSMUSG00000065952	C330021F23Rik	2610027C06Rik|Rps23r1|Rps23rg1	RIKEN cDNA C330021F23 gene	protein-coding
Peaks_1690	chr11	111065665	111066614	+	0	NA	promoter-TSS (NM_008425)	promoter-TSS (NM_008425)	-25	NM_008425	16518	Mm.4951	NM_008425	ENSMUSG00000041695	Kcnj2	IRK1|Kcnf1|Kir2.1	potassium inwardly-rectifying channel, subfamily J, member 2	protein-coding
Peaks_1721	chr9	94537096	94539025	+	0	NA	promoter-TSS (NM_001033145)	promoter-TSS (NM_001033145)	21	NM_001033145	68861	Mm.258746	NM_001033145	ENSMUSG00000045414	1190002N15Rik	GoPro49|HASF	RIKEN cDNA 1190002N15 gene	protein-coding
Peaks_1729	chr16	32489785	32490098	+	0	NA	Intergenic	(TAGTG)n|Simple_repeat|Simple_repeat	-2062	NM_145932	106407	Mm.476915	NM_145932	ENSMUSG00000035699	Slc51a	AV001382|AW261577|D630035O19Rik|OSTalpha|Osta	solute carrier family 51, alpha subunit	protein-coding
Peaks_1738	chr1	170868544	170868859	+	0	NA	promoter-TSS (NM_001081304)	promoter-TSS (NM_001081304)	-930	NM_001081304	226641	Mm.377046	NM_001081304	ENSMUSG00000026663	Atf6	9130025P16Rik|9630036G24|AA789574|Atf6alpha|ESTM49	activating transcription factor 6	protein-coding
Peaks_1740	chr19	17356237	17356840	+	0	NA	intron (NM_010265, intron 1 of 2)	CpG	129	NM_173442	14537	Mm.244825	NM_010265	ENSMUSG00000038843	Gcnt1	5630400D21Rik|B130048E03|C2 GlcNAcT|C2GNT|IGnT	glucosaminyl (N-acetyl) transferase 1, core 2	protein-coding
Peaks_1745	chr11	109297877	109298343	+	0	NA	promoter-TSS (NM_011268)	promoter-TSS (NM_011268)	71	NM_001165934	19739	Mm.38548	NM_011268	ENSMUSG00000020599	Rgs9	RGS9-1|Rgs9-2	regulator of G-protein signaling 9	protein-coding
Peaks_1748	chr3	134828834	134829778	+	0	NA	exon (NM_021382, exon 1 of 5)	exon (NM_021382, exon 1 of 5)	299	NM_021382	21338	Mm.103810	NM_021382	ENSMUSG00000028172	Tacr3	Nk3r|Nkr|Tac3r	tachykinin receptor 3	protein-coding
Peaks_1749	chr6	59208650	59209527	+	0	NA	5' UTR (NM_001081145, exon 1 of 2)	5' UTR (NM_001081145, exon 1 of 2)	218	NM_001081145	68140	Mm.25843	NM_001081145	ENSMUSG00000049232	Tigd2	3632410O17Rik	tigger transposable element derived 2	protein-coding
Peaks_1764	chr5	130448399	130449620	+	0	NA	5' UTR (NM_021371, exon 1 of 6)	5' UTR (NM_021371, exon 1 of 6)	217	NM_021371	140904	Mm.40875	NM_021371	ENSMUSG00000060371	Caln1	9630012C17Rik|Cabp8|MNCb-0849	calneuron 1	protein-coding
Peaks_1770	chr12	57197189	57197430	+	0	NA	5' UTR (NM_172577, exon 1 of 10)	5' UTR (NM_172577, exon 1 of 10)	163	NM_172577	217593	Mm.32835	NM_172577	ENSMUSG00000035472	Slc25a21	9930033G19Rik|A630030I10|BB158148	solute carrier family 25 (mitochondrial oxodicarboxylate carrier), member 21	protein-coding
Peaks_1772	chr14	88470762	88471206	+	0	NA	exon (NM_178685, exon 2 of 3)	exon (NM_178685, exon 2 of 3)	412	NM_178685	219257	Mm.128861	NM_178685	ENSMUSG00000050505	Pcdh20	C630015B17Rik|Pcdh13	protocadherin 20	protein-coding
Peaks_1795	chr15	94628808	94629447	+	0	NA	promoter-TSS (NM_178789)	promoter-TSS (NM_178789)	-58	NM_178789	320709	Mm.74873	NM_178789	ENSMUSG00000063296	Tmem117	B930062P21Rik	transmembrane protein 117	protein-coding
Peaks_1806	chr13	76018025	76018963	+	0	NA	promoter-TSS (NM_178916)	promoter-TSS (NM_178916)	68	NM_178916	218341	Mm.266515	NM_178916	ENSMUSG00000043190	Rfesd	AI256775|D030068K09	Rieske (Fe-S) domain containing	protein-coding
Peaks_1807	chr2	168741166	168742279	+	0	NA	promoter-TSS (NM_015731)	promoter-TSS (NM_015731)	78	NM_015731	11981	Mm.330819	NM_015731	ENSMUSG00000027546	Atp9a	IIa	ATPase, class II, type 9A	protein-coding
Peaks_1815	chrX	51206086	51206158	+	0	NA	promoter-TSS (NM_134163)	promoter-TSS (NM_134163)	-132	NM_134163	171170	Mm.295324	NM_134163	ENSMUSG00000036109	Mbnl3	A530038J18Rik|AI661274|CHCR|E430034C16Rik|MBLX|MBLX39|MBXL	muscleblind-like 3 (Drosophila)	protein-coding
Peaks_1827	chr2	23320968	23321798	+	0	NA	5' UTR (NM_008752, exon 1 of 2)	5' UTR (NM_008752, exon 1 of 2)	137	NM_008752	18232	Mm.131616	NM_008752	ENSMUSG00000069132	Nxph2	-	neurexophilin 2	protein-coding
Peaks_1836	chr13	48662467	48663430	+	0	NA	promoter-TSS (NM_007526)	promoter-TSS (NM_007526)	-88	NM_007526	12022	Mm.42241	NM_007526	ENSMUSG00000021381	Barx1	-	BarH-like homeobox 1	protein-coding
Peaks_1839	chr2	150451084	150451901	+	0	NA	promoter-TSS (NM_001310645)	promoter-TSS (NM_001310645)	9	NM_001310645	668923	Mm.393876	NM_001177550	ENSMUSG00000068130	Zfp442	OTTMUSG00000015730|ZIPO-II	zinc finger protein 442	protein-coding
Peaks_1840	chr6	47652743	47652957	+	0	NA	Intergenic	RMER12B|LTR|ERVK	2244	NR_002841	19799		NR_002841		Rn4.5s	-	4.5S RNA	rRNA
Peaks_1849	chrX	139684639	139685684	+	0	NA	5' UTR (NM_001081499, exon 1 of 21)	5' UTR (NM_001081499, exon 1 of 21)	165	NM_001081499	245638	Mm.275869	NM_001081499	ENSMUSG00000042473	Tbc1d8b	4921505D17Rik|9030605E16Rik	TBC1 domain family, member 8B	protein-coding
Peaks_1854	chr9	65264718	65264926	+	0	NA	promoter-TSS (NM_173385)	promoter-TSS (NM_173385)	-358	NM_173385	214425	Mm.138455	NM_173385	ENSMUSG00000042254	Cilp	9830114D16|C130036G17Rik	cartilage intermediate layer protein, nucleotide pyrophosphohydrolase	protein-coding
Peaks_1858	chr7	105952493	105952715	+	0	NA	intron (NM_029000, intron 1 of 3)	RSINE1|SINE|B4	1363	NM_001243040	100042856	Mm.425473	NM_001243039	ENSMUSG00000078606	Gm4070	VLIG-1	predicted gene 4070	protein-coding
Peaks_1863	chr1	74854598	74855240	+	0	NA	promoter-TSS (NM_009872)	promoter-TSS (NM_009872)	-110	NM_009872	12570	Mm.153833	NM_009872	ENSMUSG00000090071	Cdk5r2	B230310J22Rik|p39	cyclin-dependent kinase 5, regulatory subunit 2 (p39)	protein-coding
Peaks_1867	chr12	40133479	40134267	+	0	NA	intron (NM_009132, intron 1 of 13)	intron (NM_009132, intron 1 of 13)	355	NM_009132	20259	Mm.2416	NM_009132	ENSMUSG00000002565	Scin	AW545522|adseverin	scinderin	protein-coding
Peaks_189	chr1	11260300	11262441	+	0	NA	intron (NM_029525, intron 35 of 39)	MERVL-int|LTR|ERVL	-2593	NM_001033636	109294	Mm.123247	NM_029525	ENSMUSG00000048960	Prex2	6230420N16Rik|AI316880|AI553603|C030045D06Rik|D430013K02|Depdc2|P-Rex2	phosphatidylinositol-3,4,5-trisphosphate-dependent Rac exchange factor 2	protein-coding
Peaks_201	chr1	12666092	12666174	+	0	NA	Intergenic	L1Md_T|LINE|L1	-1430	NR_045297	329096	Mm.417782	NR_045297	ENSMUSG00000097171	Gm17644	4932411L15	predicted gene, 17644	ncRNA
Peaks_203	chr3	20366704	20367344	+	0	NA	intron (NM_175086, intron 1 of 1)	intron (NM_175086, intron 1 of 1)	153	NM_175086	11608	Mm.134863	NM_175086	ENSMUSG00000054988	Agtr1b	AT1B|AT2R1B|Agtr-1b|Angtr-1b	angiotensin II receptor, type 1b	protein-coding
Peaks_205	chr2	175703480	175703734	+	0	NA	promoter-TSS (NM_001177404)	promoter-TSS (NM_001177404)	91	NM_001177406	100303732	Mm.484983	NM_001177404	ENSMUSG00000095199	Zfp967	Gm14431|OTTMUSG00000016608	zinc finger protein 967	protein-coding
Peaks_224	chr12	119945606	119946770	+	0	NA	5' UTR (NM_001160385, exon 1 of 4)	5' UTR (NM_001160385, exon 1 of 4)	226	NM_001160385	217951	Mm.387395	NM_001160385	ENSMUSG00000048004	Tmem196	Gm528	transmembrane protein 196	protein-coding
Peaks_225	chr5	62765655	62766737	+	0	NA	promoter-TSS (NM_178407)	promoter-TSS (NM_178407)	-19	NM_178407	212285	Mm.244403	NM_178407	ENSMUSG00000037999	Arap2	Centd1|Gm148|mKIAA0580	ArfGAP with RhoGAP domain, ankyrin repeat and PH domain 2	protein-coding
Peaks_258	chr10	107123232	107124313	+	0	NA	promoter-TSS (NM_001142804)	promoter-TSS (NM_001142804)	-108	NM_198636	380660	Mm.336072	NM_198636	ENSMUSG00000035948	Acss3	8430416H19Rik|Gm874	acyl-CoA synthetase short-chain family member 3	protein-coding
Peaks_271	chr1	16623611	16624270	+	0	NA	Intergenic	MERVL-int|LTR|ERVL	-4602	NM_001271017	66799	Mm.122430	NM_025773	ENSMUSG00000025939	Ube2w	6130401J04Rik	ubiquitin-conjugating enzyme E2W (putative)	protein-coding
Peaks_279	chr14	5444674	5444972	+	0	NA	intron (NM_001291094, intron 1 of 4).2	intron (NM_001291094, intron 1 of 4).2	4216	NM_001291093	100041515	Mm.443041	NM_001205306	ENSMUSG00000096629	Gm3383	ENSMUSG00000079376	predicted gene 3383	protein-coding
Peaks_281	chr12	101717986	101719104	+	0	NA	promoter-TSS (NM_001082976)	promoter-TSS (NM_001082976)	-22	NM_001082976	74413	Mm.275939	NM_028924	ENSMUSG00000021187	Tc2n	4933406D09Rik|Mtac2d1|Tac2-N	tandem C2 domains, nuclear	protein-coding
Peaks_284	chr10	97479493	97479825	+	0	NA	5' UTR (NM_001190451, exon 1 of 8)	5' UTR (NM_001190451, exon 1 of 8)	159	NM_001190451	13179	Mm.56769	NM_007833	ENSMUSG00000019929	Dcn	DC|DSPG2|PG40|PGII|PGS2|SLRR1B	decorin	protein-coding
Peaks_288	chr18	86710597	86710883	+	0	NA	promoter-TSS (NM_001302356)	promoter-TSS (NM_001302356)	-370	NM_001302356	12405	Mm.70775	NM_172633	ENSMUSG00000024647	Cbln2	6330593N19Rik|A730004O05	cerebellin 2 precursor protein	protein-coding
Peaks_297	chr15	68927811	68928760	+	0	NA	promoter-TSS (NM_010158)	promoter-TSS (NM_010158)	-135	NM_010158	13992	Mm.17964	NM_010158	ENSMUSG00000022332	Khdrbs3	Etle|SLM-2|Salp|Slm2|T-STAR	KH domain containing, RNA binding, signal transduction associated 3	protein-coding
Peaks_304	chrX	141473642	141474096	+	0	NA	5' UTR (NM_053185, exon 1 of 45)	5' UTR (NM_053185, exon 1 of 45)	207	NM_053185	94216	Mm.155586	NM_053185	ENSMUSG00000031273	Col4a6	BB116301	collagen, type IV, alpha 6	protein-coding
Peaks_317	chr1	11259883	11260088	+	0	NA	intron (NM_029525, intron 35 of 39)	MERVL-int|LTR|ERVL	-3978	NM_001033636	109294	Mm.123247	NM_029525	ENSMUSG00000048960	Prex2	6230420N16Rik|AI316880|AI553603|C030045D06Rik|D430013K02|Depdc2|P-Rex2	phosphatidylinositol-3,4,5-trisphosphate-dependent Rac exchange factor 2	protein-coding
Peaks_324	chr12	41485857	41486083	+	0	NA	promoter-TSS (NM_001271709)	promoter-TSS (NM_001271709)	87	NM_001271708	16981	Mm.404786	NM_010733	ENSMUSG00000036295	Lrrn3	NLRR-3	leucine rich repeat protein 3, neuronal	protein-coding
Peaks_338	chr1	5078569	5078741	+	0	NA	Intergenic	L1Md_F2|LINE|L1	-4431	NM_133826	108664	Mm.27082	NM_133826	ENSMUSG00000033793	Atp6v1h	0710001F19Rik|AU022349|CGI-11|SFD|SFDalpha|SFDbeta|VMA13	ATPase, H+ transporting, lysosomal V1 subunit H	protein-coding
Peaks_344	chr10	104144394	104145165	+	0	NA	exon (NM_001270642, exon 2 of 2)	exon (NM_001270642, exon 2 of 2)	1792	NM_001270644	637578	Mm.441727	NM_001270644	ENSMUSG00000095022	Gm20765	-	predicted gene, 20765	protein-coding
Peaks_370	chr4	118546997	118548405	+	0	NA	Intergenic	G-rich|Low_complexity|Low_complexity	-3975	NM_172383	230678	Mm.23639	NM_172383	ENSMUSG00000050854	Tmem125	6330530A05Rik|AV223516	transmembrane protein 125	protein-coding
Peaks_372	chr7	59717127	59717603	+	0	NA	Intergenic	Intergenic	-1215	NR_033778	64244		NR_033778	ENSMUSG00000096475	Snord116l1	Pwcr1l1	small nucleolar RNA, C/D box 116-like 1	snoRNA
Peaks_373	chr3	127161309	127161732	+	0	NA	intron (NR_105030, intron 1 of 2)	intron (NR_105030, intron 1 of 2)	215	NR_105029	100862268	Mm.444603	NR_105029	ENSMUSG00000097456	LOC100862268	-	uncharacterized LOC100862268	ncRNA
Peaks_374	chr6	121299951	121300424	+	0	NA	promoter-TSS (NM_144512)	promoter-TSS (NM_144512)	-109	NM_144512	14412	Mm.258596	NM_144512	ENSMUSG00000030108	Slc6a13	GAT3|Gabt3|Gat2	solute carrier family 6 (neurotransmitter transporter, GABA), member 13	protein-coding
Peaks_38	chr1	12666702	12667018	+	0	NA	promoter-TSS (NR_045297)	promoter-TSS (NR_045297)	-703	NR_045297	329096	Mm.417782	NR_045297	ENSMUSG00000097171	Gm17644	4932411L15	predicted gene, 17644	ncRNA
Peaks_39	chr15	89841223	89842097	+	0	NA	exon (NM_018803, exon 1 of 7)	exon (NM_018803, exon 1 of 7)	200	NM_018803	54526	Mm.261601	NM_018803	ENSMUSG00000063260	Syt10	-	synaptotagmin X	protein-coding
Peaks_400	chr3	158560976	158562429	+	0	NA	5' UTR (NM_001291453, exon 1 of 26)	5' UTR (NM_001291453, exon 1 of 26)	519	NM_001291453	242274	Mm.132162	NM_001081358	ENSMUSG00000028176	Lrrc7	AK122498|densin|mKIAA1365	leucine rich repeat containing 7	protein-coding
Peaks_412	chr3	92211426	92212149	+	0	NA	Intergenic	RLTR1F_Mm|LTR|ERVK	-4048	NM_001164787	100303744	Mm.429851	NM_001164787	ENSMUSG00000068893	Sprr2a2	-	small proline-rich protein 2A2	protein-coding
Peaks_419	chr1	104768391	104769790	+	0	NA	intron (NM_011800, intron 1 of 11)	intron (NM_011800, intron 1 of 11)	271	NM_011800	23836	Mm.103640	NM_011800	ENSMUSG00000050840	Cdh20	Cdh7	cadherin 20	protein-coding
Peaks_423	chr8	94330796	94331075	+	0	NA	intron (NM_019415, intron 2 of 24)	intron (NM_019415, intron 2 of 24)	1727	NM_001205311	20497	Mm.25804	NM_019415	ENSMUSG00000031766	Slc12a3	AI035291|NCC|NCCT|TSC	solute carrier family 12, member 3	protein-coding
Peaks_425	chr15	93336043	93337530	+	0	NA	non-coding (NR_028315, exon 1 of 5)	non-coding (NR_028315, exon 1 of 5)	149	NR_028315	67057	Mm.4714	NM_024189	ENSMUSG00000022634	Yaf2	2810021M11Rik	YY1 associated factor 2	protein-coding
Peaks_433	chr7	59726187	59726570	+	0	NA	promoter-TSS (NR_002895).9	promoter-TSS (NR_002895).9	-126	NR_033778	64244		NR_033778	ENSMUSG00000096475	Snord116l1	Pwcr1l1	small nucleolar RNA, C/D box 116-like 1	snoRNA
Peaks_435	chr8	41133236	41134295	+	0	NA	promoter-TSS (NM_001005863)	promoter-TSS (NM_001005863)	-39	NM_001005863	102103	Mm.149438	NM_001005863	ENSMUSG00000045636	Mtus1	AI481402|ATBP135|Atip1|B430010I23Rik|B430305I03Rik|C85752|Cctsg1-440|MD44|MTSG1|mKIAA1288	mitochondrial tumor suppressor 1	protein-coding
Peaks_436	chr10	29143524	29143823	+	0	NA	promoter-TSS (NM_026138)	promoter-TSS (NM_026138)	-323	NM_026138	67412	Mm.390264	NM_026138	ENSMUSG00000038916	Soga3	6330407J23Rik	SOGA family member 3	protein-coding
Peaks_439	chrX	11299377	11299673	+	0	NA	exon (NM_001242949, exon 1 of 1).3	exon (NM_001242949, exon 1 of 1).3	204	NM_001242950	100042931	Mm.374311	NM_001242950	ENSMUSG00000094904	H2al1d	ENSMUSG00000073284|Gm14476|OTTMUSG00000016781	H2A histone family member L1D	protein-coding
Peaks_440	chr3	63295271	63296240	+	0	NA	promoter-TSS (NM_008604)	promoter-TSS (NM_008604)	-117	NM_008604	17380	Mm.296022	NM_008604	ENSMUSG00000027820	Mme	6030454K05Rik|C85356|CALLA|CD10|NEP|SFE	membrane metallo endopeptidase	protein-coding
Peaks_453	chr7	88430020	88430689	+	0	NA	promoter-TSS (NM_028238)	promoter-TSS (NM_028238)	81	NM_028238	72433	Mm.276669	NM_028238	ENSMUSG00000030559	Rab38	2310011F14Rik|AU043391|cht	RAB38, member RAS oncogene family	protein-coding
Peaks_475	chr9	89622525	89623596	+	0	NA	promoter-TSS (NM_153509)	promoter-TSS (NM_153509)	-74	NM_153509	209743	Mm.242899	NM_153509	ENSMUSG00000039313	AF529169	DD1|Kiaa1024	cDNA sequence AF529169	protein-coding
Peaks_485	chr9	76322778	76323832	+	0	NA	exon (NM_198962, exon 1 of 8)	exon (NM_198962, exon 1 of 8)	273	NM_198962	387285	Mm.335300	NM_198962	ENSMUSG00000032360	Hcrtr2	OX2R|mOX2aR|mOX2bR|mOXR2	hypocretin (orexin) receptor 2	protein-coding
Peaks_499	chr10	130279988	130280500	+	0	NA	promoter-TSS (NM_001329490)	promoter-TSS (NM_001329490)	10	NM_001329490	11923	Mm.10695	NM_007501	ENSMUSG00000048015	Neurod4	AI846749|ATH-3|Atoh3|MATH-3|Math3|bHLHa4	neurogenic differentiation 4	protein-coding
Peaks_503	chr1	91801449	91802130	+	0	NA	exon (NM_007855, exon 1 of 2)	exon (NM_007855, exon 1 of 2)	328	NM_007855	13345	Mm.9474	NM_007855	ENSMUSG00000007805	Twist2	Dermo1|bHLHa39	twist basic helix-loop-helix transcription factor 2	protein-coding
Peaks_505	chr8	112569542	112570149	+	0	NA	promoter-TSS (NM_130457)	promoter-TSS (NM_130457)	-198	NM_130457	170571	Mm.209232	NM_130457	ENSMUSG00000031772	Cntnap4	Caspr4|E130114F09Rik	contactin associated protein-like 4	protein-coding
Peaks_510	chr14	105499608	105499897	+	0	NA	intron (NR_045921, intron 1 of 2)	intron (NR_045921, intron 1 of 2)	964	NR_045921	74864	Mm.159344	NR_045921	ENSMUSG00000022116	4930449E01Rik	-	RIKEN cDNA 4930449E01 gene	ncRNA
Peaks_524	chr14	108911180	108912104	+	0	NA	exon (NM_199065, exon 1 of 1)	exon (NM_199065, exon 1 of 1)	2597	NM_199065	76965	Mm.257268	NM_199065	ENSMUSG00000075478	Slitrk1	3200001I04Rik	SLIT and NTRK-like family, member 1	protein-coding
Peaks_531	chr1	74659493	74659612	+	0	NA	Intergenic	IAPEz-int|LTR|ERVK	-2202	NM_001014974	67534	Mm.260714	NM_001014974	ENSMUSG00000033257	Ttll4	4632407P03Rik|AI451681|mKIAA0173	tubulin tyrosine ligase-like family, member 4	protein-coding
Peaks_537	chr12	72664000	72664099	+	0	NA	intron (NM_025522, intron 1 of 6)	intron (NM_025522, intron 1 of 6)	779	NM_025522	66375	Mm.289653	NM_025522	ENSMUSG00000021094	Dhrs7	2310016E22Rik|5730564L20Rik|AW061210|Retdsr4|Retsdr4	dehydrogenase/reductase (SDR family) member 7	protein-coding
Peaks_541	chr8	63951789	63952407	+	0	NA	promoter-TSS (NM_001195687)	promoter-TSS (NM_001195687)	72	NM_001195687	244495	Mm.485331	NM_001195687	ENSMUSG00000094443	Sgol2b	EG244495|Gm4975|Sgo2B	shugoshin like 2b (S. pombe)	protein-coding
Peaks_551	chr3	82903579	82904236	+	0	NA	promoter-TSS (NR_040381)	promoter-TSS (NR_040381)	67	NM_023624	79235	Mm.33921	NM_023624	ENSMUSG00000028003	Lrat	1300010A18Rik|AI449251	lecithin-retinol acyltransferase (phosphatidylcholine-retinol-O-acyltransferase)	protein-coding
Peaks_566	chr2	132144580	132145456	+	0	NA	promoter-TSS (NM_018824)	promoter-TSS (NM_018824)	90	NM_018824	54338	Mm.103581	NM_018824	ENSMUSG00000027340	Slc23a2	AI844736|NBTL1|SVCT2|Slc23a1|YSPL2|YSPL3|mKIAA0238	solute carrier family 23 (nucleobase transporters), member 2	protein-coding
Peaks_574	chr6	13224576	13225136	+	0	NA	exon (NM_001013757, exon 1 of 12)	exon (NM_001013757, exon 1 of 12)	109	NM_001013757	232585	Mm.389082	NM_001013757	ENSMUSG00000079679	Vwde	Gm467	von Willebrand factor D and EGF domains	protein-coding
Peaks_608	chrX	37241676	37241838	+	0	NA	Intergenic	Intergenic	-3235	NM_001310503	75199	Mm.391240	NM_029203	ENSMUSG00000051827	Rhox2a	4930539I12Rik|Rhox2|Rhox2.1	reproductive homeobox 2A	protein-coding
Peaks_609	chr13	21396111	21396442	+	0	NA	TTS (NR_105907)	TTS (NR_105907)	362	NR_105907	102465568		NR_105907	ENSMUSG00000098790	Mir6942	Gm27287|mmu-mir-6942	microRNA 6942	ncRNA
Peaks_618	chr3	129754765	129755209	+	0	NA	non-coding (NR_040589, exon 2 of 5)	non-coding (NR_040589, exon 2 of 5)	335	NM_010113	13645	Mm.252481	NM_010113	ENSMUSG00000028017	Egf	AI790464	epidermal growth factor	protein-coding
Peaks_622	chr3	141465926	141465999	+	0	NA	intron (NM_001293561, intron 1 of 16)	intron (NM_001293561, intron 1 of 16)	398	NM_001293561	22253	Mm.24430	NM_009472	ENSMUSG00000059921	Unc5c	B130051O18Rik|Unc5h3|rcm	unc-5 netrin receptor C	protein-coding
Peaks_627	chr9	6168295	6168971	+	0	NA	promoter-TSS (NM_027924)	promoter-TSS (NM_027924)	21	NM_027924	71785	Mm.390122	NM_027924	ENSMUSG00000032006	Pdgfd	1110003I09Rik	platelet-derived growth factor, D polypeptide	protein-coding
Peaks_63	chrX	37254058	37254313	+	0	NA	promoter-TSS (NM_001184969)	promoter-TSS (NM_001184969)	-693	NM_001184969	100135657	Mm.379498	NM_001184969	ENSMUSG00000059626	Rhox3e	ENSMUSG00000071772|OTTMUSG00000017148|Rhox3.5|Rhox3d	reproductive homeobox 3E	protein-coding
Peaks_639	chr13	4608944	4609487	+	0	NA	promoter-TSS (NM_018859)	promoter-TSS (NM_018859)	-51	NM_018859	56043	Mm.251908	NM_018859	ENSMUSG00000045410	Akr1e1	1810061I10Rik|Akr1e2	aldo-keto reductase family 1, member E1	protein-coding
Peaks_657	chr5	139324995	139325778	+	0	NA	promoter-TSS (NM_172723)	promoter-TSS (NM_172723)	78	NM_172723	231821	Mm.297819	NM_172723	ENSMUSG00000056413	Adap1	4930431P11Rik|Centa1|GC1L|p42IP4	ArfGAP with dual PH domains 1	protein-coding
Peaks_661	chr1	12666350	12666649	+	0	NA	Intergenic	L1Md_T|LINE|L1	-1064	NR_045297	329096	Mm.417782	NR_045297	ENSMUSG00000097171	Gm17644	4932411L15	predicted gene, 17644	ncRNA
Peaks_671	chr10	100335857	100336072	+	0	NA	exon (NM_001166636, exon 1 of 1)	exon (NM_001166636, exon 1 of 1)	288	NM_001166637	100043224	Mm.478257	NM_001166637	ENSMUSG00000094314	Gm4301	-	predicted gene 4301	protein-coding
Peaks_675	chr1	5921509	5921595	+	0	NA	Intergenic	L1Md_F2|LINE|L1	-4154	NM_010342	226304	Mm.291110	NM_010342	ENSMUSG00000033774	Npbwr1	Gpr7|Nbpwr1	neuropeptides B/W receptor 1	protein-coding
Peaks_72	chr2	175274804	175275510	+	0	NA	promoter-TSS (NM_001199308)	promoter-TSS (NM_001199308)	32	NM_001199308	100503353	Mm.455970	NM_001199308	ENSMUSG00000078901	Gm14440	OTTMUSG00000016618	predicted gene 14440	protein-coding
Peaks_726	chr7	20194106	20194301	+	0	NA	exon (NM_001166750, exon 1 of 1)	exon (NM_001166750, exon 1 of 1)	493	NM_001166750	667469	Mm.484971	NM_001166750	ENSMUSG00000096071	Vmn1r143	EG667469|Gm8650	vomeronasal 1 receptor 143	protein-coding
Peaks_737	chr2	148752070	148752843	+	0	NA	intron (NM_177655, intron 2 of 3)	intron (NM_177655, intron 2 of 3)	2095	NM_177655	228756	Mm.189390	NM_177655	ENSMUSG00000055177	Cstl1	RCET1|RCET2|RCET3	cystatin-like 1	protein-coding
Peaks_753	chr18	62323611	62324470	+	0	NA	promoter-TSS (NM_008313)	promoter-TSS (NM_008313)	-164	NM_008313	15562	Mm.20440	NM_008313	ENSMUSG00000026322	Htr4	5-HT-4|5-HT4|5-HT<4L>|5HTR4	5 hydroxytryptamine (serotonin) receptor 4	protein-coding
Peaks_763	chr9	107935658	107936287	+	0	NA	promoter-TSS (NM_145621)	promoter-TSS (NM_145621)	52	NM_145621	235604	Mm.274540	NM_145621	ENSMUSG00000032936	Camkv	1G5|BB074618|BC017634	CaM kinase-like vesicle-associated	protein-coding
Peaks_774	chr6	129237654	129238520	+	0	NA	promoter-TSS (NR_040265)	promoter-TSS (NR_040265)	-42	NR_040265	76432	Mm.261738	NR_040265	ENSMUSG00000097354	2310001H17Rik	AI646108	RIKEN cDNA 2310001H17 gene	ncRNA
Peaks_779	chr15	64921738	64922651	+	0	NA	5' UTR (NM_009623, exon 1 of 18)	5' UTR (NM_009623, exon 1 of 18)	102	NM_001331075	11514	Mm.1425	NM_009623	ENSMUSG00000022376	Adcy8	AC8|AW060868	adenylate cyclase 8	protein-coding
Peaks_78	chr9	3199245	3200376	+	0	NA	promoter-TSS (NR_027988)	promoter-TSS (NR_027988)	3	NR_027988	114673	Mm.422774	NM_053265	ENSMUSG00000042360	4930433N12Rik	-	RIKEN cDNA 4930433N12 gene	ncRNA
Peaks_791	chr3	151437586	151438241	+	0	NA	promoter-TSS (NM_133222)	promoter-TSS (NM_133222)	31	NM_133222	170757	Mm.317261	NM_133222	ENSMUSG00000039167	Adgrl4	1110033N21Rik|ETL1|Eltd1|Etl	adhesion G protein-coupled receptor L4	protein-coding
Peaks_794	chr1	140245394	140246404	+	0	NA	promoter-TSS (NM_001081027)	promoter-TSS (NM_001081027)	-358	NM_001081027	240776	Mm.483845	NM_001081027	ENSMUSG00000052726	Kcnt2	E330038N15Rik|Slick	potassium channel, subfamily T, member 2	protein-coding
Peaks_817	chr2	107290107	107290833	+	0	NA	promoter-TSS (NM_021275)	promoter-TSS (NM_021275)	-119	NM_021275	16492	Mm.142718	NM_021275	ENSMUSG00000042604	Kcna4	Kv1.4	potassium voltage-gated channel, shaker-related subfamily, member 4	protein-coding
Peaks_841	chr7	51510708	51511550	+	0	NA	promoter-TSS (NM_177694)	promoter-TSS (NM_177694)	100	NM_001271879	233246	Mm.254431	NM_177694	ENSMUSG00000055489	Ano5	9330162L24|Gdd1|Tmem16e	anoctamin 5	protein-coding
Peaks_851	chr8	41217917	41218205	+	0	NA	Intergenic	RLTR20B3A_MM|LTR|ERVK	-2905	NM_145594	234199	Mm.277955	NM_145594	ENSMUSG00000031594	Fgl1	Mfire1	fibrinogen-like protein 1	protein-coding
Peaks_864	chr11	68591705	68592020	+	0	NA	intron (NM_177779, intron 4 of 6)	intron (NM_177779, intron 4 of 6)	4825	NM_177779	276920	Mm.123046	NM_177779	ENSMUSG00000045915	Ccdc42	A530001H01Rik	coiled-coil domain containing 42	protein-coding
Peaks_886	chr1	180242240	180242721	+	0	NA	intron (NM_001128605, intron 2 of 10)	intron (NM_001128605, intron 2 of 10)	3470	NM_011183	19165	Mm.330850	NM_011183	ENSMUSG00000010609	Psen2	ALG-3|Ad4h|Alg3|PS-2|PS2|Psnl2|STM2	presenilin 2	protein-coding
Peaks_900	chr7	133708704	133709590	+	0	NA	promoter-TSS (NM_025392)	promoter-TSS (NM_025392)	148	NM_009479	22276	Mm.3160	NM_009479	ENSMUSG00000030979	Uros	AI415298|UROIIIS|Uros3	uroporphyrinogen III synthase	protein-coding
Peaks_913	chr5	70842255	70842551	+	0	NA	5' UTR (NM_010252, exon 1 of 9)	5' UTR (NM_010252, exon 1 of 9)	214	NM_010252	14405	Mm.255292	NM_010252	ENSMUSG00000001260	Gabrg1	GabaA|GabaA/BZ	gamma-aminobutyric acid (GABA) A receptor, subunit gamma 1	protein-coding
Peaks_919	chr5	14910677	14911280	+	0	NA	intron (NM_198666, intron 4 of 4)	intron (NM_198666, intron 4 of 4)	3911	NM_198666	381714	Mm.368256	NM_198666	ENSMUSG00000033219	Gm9758	ENSMUSG00000033219	predicted gene 9758	protein-coding
Peaks_921	chr1	127868524	127869215	+	0	NA	promoter-TSS (NM_178690)	promoter-TSS (NM_178690)	96	NM_178690	226407	Mm.489713	NM_178690	ENSMUSG00000036104	Rab3gap1	1700003B17Rik|4732493F09Rik|AL117896|Rab3gap|p130	RAB3 GTPase activating protein subunit 1	protein-coding
Peaks_931	chr1	58112912	58113118	+	0	NA	promoter-TSS (NM_023617)	promoter-TSS (NM_023617)	-121	NM_023617	71724	Mm.20108	NM_023617	ENSMUSG00000064294	Aox3	1200011D03Rik|AI326299|Aoh1|Aoh2	aldehyde oxidase 3	protein-coding
Peaks_944	chr3	132949266	132950666	+	0	NA	promoter-TSS (NM_001287103)	promoter-TSS (NM_001287103)	-152	NM_001287103	114249	Mm.279310	NM_033525	ENSMUSG00000040998	Npnt	1110009H02Rik|AA682063|AI314031|Nctn|POEM	nephronectin	protein-coding
Peaks_954	chr11	96363925	96364230	+	0	NA	Intergenic	Intergenic	-1681	NM_008266	15407	Mm.890	NM_008266	ENSMUSG00000018973	Hoxb1	Hox-2.9	homeobox B1	protein-coding
Peaks_958	chr5	17574407	17575090	+	0	NA	promoter-TSS (NM_013657)	promoter-TSS (NM_013657)	-68	NM_013657	20348	Mm.5071	NM_013657	ENSMUSG00000028780	Sema3c	1110036B02Rik|SemE|Semae	sema domain, immunoglobulin domain (Ig), short basic domain, secreted, (semaphorin) 3C	protein-coding
Peaks_967	chr16	50732324	50733037	+	0	NA	promoter-TSS (NR_028300)	promoter-TSS (NR_028300)	93	NR_028300	68190	Mm.139089	NR_028300		Dubr	5330426P16Rik|Dum	Dppa2 upstream binding RNA	ncRNA
Peaks_974	chr5	129500776	129500950	+	0	NA	promoter-TSS (NM_172276)	promoter-TSS (NM_172276)	-368	NM_172276	231769	Mm.288714	NM_172276	ENSMUSG00000029439	Sfswap	1190005N23Rik|6330437E22Rik|AI197402|AW212079|SWAP|Sfrs8|Srsf8	splicing factor, suppressor of white-apricot homolog (Drosophila)	protein-coding
Peaks_984	chr2	181670358	181671090	+	0	NA	exon (NM_009236, exon 2 of 2)	exon (NM_009236, exon 2 of 2)	916	NM_009236	20672	Mm.264904	NM_009236	ENSMUSG00000046470	Sox18	AI385749|Ra|Ragl	SRY (sex determining region Y)-box 18	protein-coding
Peaks_990	chr5	131306324	131306606	+	0	NA	exon (NM_145218, exon 1 of 11)	exon (NM_145218, exon 1 of 11)	1057	NM_145218	212996	Mm.299204	NM_145218	ENSMUSG00000034040	Wbscr17	AA388321|E330012B09Rik	Williams-Beuren syndrome chromosome region 17 homolog (human)	protein-coding
Peaks_998	chr4	135573537	135573832	+	0	NA	promoter-TSS (NM_001013756)	promoter-TSS (NM_001013756)	-64	NM_001013756	230824	Mm.331972	NM_001013756	ENSMUSG00000037188	Grhl3	AI561912|Get1|Som|Tfcp2l4|ct	grainyhead-like 3 (Drosophila)	protein-coding

## Sheet: GFP_50k
Peaks_1	Chr	1	End	+	0	NA	NA	NA	NA	NA
Peaks_100	chr1	158331810	158331978	+	0	NA	intron (NM_207583, intron 1 of 7)	L1Md_T|LINE|L1	24366	NM_207583	240843	Mm.329579	NM_207583	ENSMUSG00000004031	Brinp2	6430517E21Rik|BB361039|Fam5b|mKIAA1747	bone morphogenic protein/retinoic acid inducible neural-specific 2	protein-coding
Peaks_1003	chr1	24727527	24727722	+	0	NA	intron (NM_001310483, intron 7 of 15)	L1Md_T|LINE|L1	48706	NM_001310483	68421	Mm.336563	NM_026719	ENSMUSG00000073725	Lmbrd1	0910001K20Rik|AV347960	LMBR1 domain containing 1	protein-coding
Peaks_1004	chr1	85141793	85142533	+	0	NA	Intergenic	RLTR6-int|LTR|ERV1	-32310	NM_213615	381287	Mm.487565	NM_213615	ENSMUSG00000089844	A530032D15Rik	Gm1888	RIKEN cDNA A530032D15Rik gene	protein-coding
Peaks_101	chr1	10890677	10892387	+	0	NA	Intergenic	MERVL-int|LTR|ERVL	-25658	NR_030645	100124448		NR_030645	ENSMUSG00000076948	Mir467e	Mirn467e	microRNA 467e	ncRNA
Peaks_1010	chr2	68553417	68553647	+	0	NA	Intergenic	RLTR6-int|LTR|ERV1	-28881	NM_177651	227998	Mm.67562	NM_177651	ENSMUSG00000053896	4933409G03Rik	-	RIKEN cDNA 4933409G03 gene	protein-coding
Peaks_1014	chr7	59728744	59729364	+	0	NA	Intergenic	Intergenic	-2802	NR_033778	64244		NR_033778	ENSMUSG00000096475	Snord116l1	Pwcr1l1	small nucleolar RNA, C/D box 116-like 1	snoRNA
Peaks_1017	chrX	49797429	49798131	+	0	NA	promoter-TSS (NM_177591)	promoter-TSS (NM_177591)	-35	NM_177591	209268	Mm.110505	NM_177591	ENSMUSG00000031111	Igsf1	5330413N23|5530402E03|AI747649|InhBP/p120|mKIAA0364	immunoglobulin superfamily, member 1	protein-coding
Peaks_1018	chr1	87134564	87134779	+	0	NA	Intergenic	IAPEz-int|LTR|ERVK	9663	NM_007432	11648	Mm.377076	NM_007432	ENSMUSG00000036500	Akp3	Akp-3|IAP|dIAP	alkaline phosphatase 3, intestine, not Mn requiring	protein-coding
Peaks_1019	chr3	92106638	92106918	+	0	NA	Intergenic	MIR|SINE|MIR	17169	NM_175424	109314	Mm.440617	NM_175424	ENSMUSG00000056270	Prr9	A030004J04Rik	proline rich 9	protein-coding
Peaks_1021	chrX	162643248	162643879	+	0	NA	promoter-TSS (NM_001290633)	promoter-TSS (NM_001290633)	95	NM_001290633	194590	Mm.442441	NM_178256	ENSMUSG00000040855	Reps2	POB1	RALBP1 associated Eps domain containing protein 2	protein-coding
Peaks_1025	chr4	41877183	41877391	+	0	NA	Intergenic	LTRIS2|LTR|ERV1	-12508	NR_033506	100042539	Mm.418556	NR_033506		Gm3893	-	predicted gene 3893	ncRNA
Peaks_1028	chr7	44335626	44336251	+	0	NA	intron (NM_001034115, intron 15 of 24)	GC_rich|Low_complexity|Low_complexity	25674	NM_001034115	243961	Mm.360368	NM_001034115	ENSMUSG00000038738	Shank1	-	SH3/ankyrin domain gene 1	protein-coding
Peaks_1029	chr5	14978388	14978838	+	0	NA	TTS (NR_001584)	TTS (NR_001584)	286	NM_001281514	100503549	Mm.491086	NM_001281514	ENSMUSG00000072188	Gm10354	ENSMUSG00000072188	predicted gene 10354	protein-coding
Peaks_1034	chr10	93539756	93540263	+	0	NA	promoter-TSS (NM_027908)	promoter-TSS (NM_027908)	24	NM_027908	71761	Mm.244518	NM_027908	ENSMUSG00000015890	Amdhd1	1300019J08Rik	amidohydrolase domain containing 1	protein-coding
Peaks_1040	chr6	82402662	82403101	+	0	NA	5' UTR (NM_009313, exon 2 of 6)	5' UTR (NM_009313, exon 2 of 6)	406	NM_009313	21336	Mm.8055	NM_009313	ENSMUSG00000030043	Tacr1	Nk1r|Spr|Tac1r	tachykinin receptor 1	protein-coding
Peaks_1041	chrX	169036344	169037146	+	0	NA	non-coding (NR_109847, exon 1 of 15)	non-coding (NR_109847, exon 1 of 15)	134	NR_109847	11856	Mm.441810	NM_009707	ENSMUSG00000031355	Arhgap6	AI504284|RhoGAPX-1	Rho GTPase activating protein 6	protein-coding
Peaks_1042	chr4	78211452	78212399	+	0	NA	promoter-TSS (NM_011211)	promoter-TSS (NM_011211)	-30	NM_011211	19266	Mm.184021	NM_011211	ENSMUSG00000028399	Ptprd	1110002J03Rik|3000002J10Rik|B230219D21Rik|R-PTP-delta	protein tyrosine phosphatase, receptor type, D	protein-coding
Peaks_1044	chr8	20275833	20276195	+	0	NA	intron (NR_030708, intron 3 of 4)	L1_Mus2|LINE|L1	21418	NR_030708	547150	Mm.359054	NR_030708	ENSMUSG00000071796	6820431F20Rik	-	cadherin 11 pseudogene	pseudo
Peaks_1050	chr13	112430494	112430880	+	0	NA	Intergenic	Intergenic	-33383	NM_010560	16195	Mm.4364	NM_010560	ENSMUSG00000021756	Il6st	5133400A03Rik|AA389424|BB405851|CD130|D13Ertd699e|gp130	interleukin 6 signal transducer	protein-coding
Peaks_1055	chr1	87742388	87743187	+	0	NA	Intergenic	MERVL-int|LTR|ERVL	-13224	NM_029846	77040	Mm.272972	NM_029846	ENSMUSG00000026289	Atg16l1	1500009K01Rik|Apg16l|Atg16l|WDR30	autophagy related 16-like 1 (S. cerevisiae)	protein-coding
Peaks_1056	chr1	74653989	74654357	+	0	NA	Intergenic	IAPEz-int|LTR|ERVK	-7581	NM_001014974	67534	Mm.260714	NM_001014974	ENSMUSG00000033257	Ttll4	4632407P03Rik|AI451681|mKIAA0173	tubulin tyrosine ligase-like family, member 4	protein-coding
Peaks_106	chr13	107698961	107699126	+	0	NA	Intergenic	Intergenic	11646	NR_045900	72257	Mm.234155	NR_045900	ENSMUSG00000102000	1700006H21Rik	-	RIKEN cDNA 1700006H21 gene	ncRNA
Peaks_1060	chr8	117021810	117021951	+	0	NA	exon (NM_029686, exon 32 of 43)	exon (NM_029686, exon 32 of 43)	-28431	NM_026572	68133	Mm.258462	NM_026572	ENSMUSG00000034424	Gcsh	1100001L02Rik|5730591C18Rik	glycine cleavage system protein H (aminomethyl carrier)	protein-coding
Peaks_1066	chr17	23535576	23535872	+	0	NA	Intergenic	Intergenic	-15075	NR_126485	320020	Mm.445111	NR_126484		6330415G19Rik	-	RIKEN cDNA 6330415G19 gene	ncRNA
Peaks_1067	chr17	13309579	13309781	+	0	NA	Intergenic	Intergenic	-44892	NM_001167578	100041352	Mm.490251	NM_001167578	ENSMUSG00000052469	Tcp10c	D17Leh66C|D17Leh66ca|Gm9880|T66C-a|Tcp-10c	t-complex protein 10c	protein-coding
Peaks_1069	chr10	29143971	29144226	+	0	NA	5' UTR (NM_026138, exon 1 of 7)	5' UTR (NM_026138, exon 1 of 7)	102	NM_026138	67412	Mm.390264	NM_026138	ENSMUSG00000038916	Soga3	6330407J23Rik	SOGA family member 3	protein-coding
Peaks_1073	chr1	5627808	5628314	+	0	NA	Intergenic	L1Md_T|LINE|L1	39568	NM_001204371	18387	Mm.7977	NM_011011	ENSMUSG00000025905	Oprk1	K-OR-1|KOR|KOR-1|MSL-1|Oprk2|R21	opioid receptor, kappa 1	protein-coding
Peaks_1077	chr2	180641688	180642881	+	0	NA	exon (NM_178254, exon 1 of 6)	exon (NM_178254, exon 1 of 6)	407	NM_178254	277353	Mm.473700	NM_178254	ENSMUSG00000038932	Tcfl5	AV260129|Figlb|Sosf1	transcription factor-like 5 (basic helix-loop-helix)	protein-coding
Peaks_1078	chr2	138837178	138837560	+	0	NA	Intergenic	IAPEz-int|LTR|ERVK	17440	NR_035477	100316816		NR_035477	ENSMUSG00000088983	Mir1952	mmu-mir-1952	microRNA 1952	ncRNA
Peaks_1079	chr7	59674646	59675077	+	0	NA	intron (NR_015351, intron 2 of 5)	intron (NR_015351, intron 2 of 5)	1218	NR_002895	64243	Mm.423722	NR_002895	ENSMUSG00000096019	Snord116	MBII-85|Pwcr1	small nucleolar RNA, C/D box 116	snoRNA
Peaks_1080	chr13	119597433	119597587	+	0	NA	intron (NM_001039244, intron 2 of 2)	intron (NM_001039244, intron 2 of 2)	-26309	NM_020279	56838	Mm.143745	NM_020279	ENSMUSG00000074715	Ccl28	CCK1|MEC|Scya28	chemokine (C-C motif) ligand 28	protein-coding
Peaks_1081	chr2	66256097	66257149	+	0	NA	promoter-TSS (NM_001290669)	promoter-TSS (NM_001290669)	-6	NM_001290669	73668	Mm.250868	NM_001047604	ENSMUSG00000034848	Ttc21b	2410066K11Rik|Thm1|aln|mKIAA1992	tetratricopeptide repeat domain 21B	protein-coding
Peaks_1083	chr1	166085010	166085695	+	0	NA	Intergenic	MMERVK10C-int|LTR|ERVK	42546	NM_001033344	240892	Mm.35315	NM_001033344	ENSMUSG00000026564	Dusp27	C130085G02Rik|Gm209	dual specificity phosphatase 27 (putative)	protein-coding
Peaks_1090	chr7	100012558	100012745	+	0	NA	intron (NM_001291320, intron 1 of 10)	intron (NM_001291320, intron 1 of 10)	2733	NM_001291320	69121	Mm.285295	NM_133709	ENSMUSG00000030732	Chrdl2	1810022C01Rik|Chl2	chordin-like 2	protein-coding
Peaks_1096	chrX	29976099	29976754	+	0	NA	intron (NM_001099347, intron 1 of 8).12	intron (NM_001099347, intron 1 of 8).12	112	NM_001109969	100039240	Mm.483167	NM_001109969	ENSMUSG00000095293	Gm10058	ENSMUSG00000059047	predicted gene 10058	protein-coding
Peaks_1097	chr1	69702588	69703101	+	0	NA	Intergenic	IAPA_MM-int|LTR|ERVK	-16884	NM_011770	22779	Mm.106343	NM_011770	ENSMUSG00000025997	Ikzf2	A730095J18Rik|Helios|Zfpn1a2|Znfn1a2	IKAROS family zinc finger 2	protein-coding
Peaks_1100	chr17	36060879	36061084	+	0	NA	Intergenic	Intergenic	-2610	NM_001199967	100529082	Mm.484641	NM_001199967	ENSMUSG00000079492	Gm11127	ENSMUSG00000079492	predicted gene 11127	protein-coding
Peaks_1104	chrX	75758980	75759238	+	0	NA	intron (NR_029443, intron 2 of 8)	intron (NR_029443, intron 2 of 8)	5590	NR_029443	74396	Mm.162493	NR_029443	ENSMUSG00000087396	4933407K13Rik	A130080L05Rik	RIKEN cDNA 4933407K13 gene	ncRNA
Peaks_1105	chr1	69701869	69702510	+	0	NA	Intergenic	IAPEz-int|LTR|ERVK	-16229	NM_011770	22779	Mm.106343	NM_011770	ENSMUSG00000025997	Ikzf2	A730095J18Rik|Helios|Zfpn1a2|Znfn1a2	IKAROS family zinc finger 2	protein-coding
Peaks_1106	chr1	194629305	194629770	+	0	NA	intron (NM_008882, intron 1 of 31)	intron (NM_008882, intron 1 of 31)	9708	NM_008882	18845	Mm.2251	NM_008882	ENSMUSG00000026640	Plxna2	2810428A13Rik|AA589422|AW457381|OCT|PlexA2|Plxn2|mKIAA0463	plexin A2	protein-coding
Peaks_1108	chr7	104501978	104502373	+	0	NA	intron (NM_199146, intron 1 of 7)	CpG	5674	NM_199146	209387	Mm.277377	NM_199146	ENSMUSG00000057596	Trim30d	AI451617|TRIM30-3|Trim79	tripartite motif-containing 30D	protein-coding
Peaks_111	chr2	36015244	36016023	+	0	NA	Intergenic	IAPEz-int|LTR|ERVK	33659	NM_026703	68375	Mm.19834	NM_026703	ENSMUSG00000026895	Ndufa8	0610033L03Rik|AW261656	NADH dehydrogenase (ubiquinone) 1 alpha subcomplex, 8	protein-coding
Peaks_1111	chr1	16622144	16622464	+	0	NA	Intergenic	MT2_Mm|LTR|ERVL	-2966	NM_001271017	66799	Mm.122430	NM_025773	ENSMUSG00000025939	Ube2w	6130401J04Rik	ubiquitin-conjugating enzyme E2W (putative)	protein-coding
Peaks_1112	chr8	104509117	104510278	+	0	NA	intron (NM_180958, intron 1 of 19)	CpG-14407	190	NM_180958	320022	Mm.249775	NM_180958	ENSMUSG00000052616	Terb1	4930532D21Rik|BB085179|Ccdc79	telomere repeat binding bouquet formation protein 1	protein-coding
Peaks_1113	chr1	77481891	77482801	+	0	NA	intron (NM_007936, intron 3 of 17)	MERVL-int|LTR|ERVL	14422	NR_105770	102465180		NR_105770	ENSMUSG00000099141	Mir6352	Gm27481|mmu-mir-6352	microRNA 6352	ncRNA
Peaks_1122	chr4	53439894	53441107	+	0	NA	promoter-TSS (NM_001159633)	promoter-TSS (NM_001159633)	87	NM_133891	100434	Mm.482207	NM_133891	ENSMUSG00000028412	Slc44a1	2210409B22Rik|4833416H08Rik|AW547365|CHTL1|CTL1|Cdw92	solute carrier family 44, member 1	protein-coding
Peaks_1127	chr10	22158252	22158907	+	0	NA	promoter-TSS (NM_009016)	promoter-TSS (NM_009016)	-30	NM_009016	19368	Mm.458004	NM_009016		Raet1a	RAE-1alpha|Rae1alpha|Raet1	retinoic acid early transcript 1, alpha	protein-coding
Peaks_1129	chr12	100996585	100996886	+	0	NA	intron (NM_026681, intron 3 of 29)	intron (NM_026681, intron 3 of 29)	25033	NR_035421	100316805		NR_035421	ENSMUSG00000080575	Mir1190	Mirn1190|mmu-mir-1190	microRNA 1190	ncRNA
Peaks_1137	chr1	87466165	87466446	+	0	NA	Intergenic	IAPEz-int|LTR|ERVK	-3959	NM_028473	73234	Mm.7310	NM_028473	ENSMUSG00000026258	3110079O15Rik	Snorc	RIKEN cDNA 3110079O15 gene	protein-coding
Peaks_1151	chr17	15722657	15722974	+	0	NA	intron (NM_007690, intron 2 of 35)	(TGGA)n|Simple_repeat|Simple_repeat	17848	NM_007690	12648	Mm.8137	NM_007690	ENSMUSG00000023852	Chd1	4930525N21Rik|AI851787|AW555109	chromodomain helicase DNA binding protein 1	protein-coding
Peaks_1156	chr1	91475505	91475767	+	0	NA	Intergenic	IAPEz-int|LTR|ERVK	-16308	NM_011066	18627	Mm.482463	NM_011066	ENSMUSG00000055866	Per2	mKIAA0347|mPer2	period circadian clock 2	protein-coding
Peaks_1159	chr10	121740547	121740649	+	0	NA	intron (NM_173022, intron 1 of 2)	intron (NM_173022, intron 1 of 2)	661	NM_173022	270802	Mm.209172	NM_173022	ENSMUSG00000053684	BC048403	E030027L10	cDNA sequence BC048403	protein-coding
Peaks_1162	chr2	57218582	57219042	+	0	NA	Intergenic	RLTR4_MM-int|LTR|ERV1	-18866	NM_001145820	14571	Mm.3711	NM_010274	ENSMUSG00000026827	Gpd2	AA408484|AI448216|AU021455|AW494132|GPDH|Gdm1|Gpd-m|Gpdh-m|TISP38	glycerol phosphate dehydrogenase 2, mitochondrial	protein-coding
Peaks_1163	chr9	78615385	78616089	+	0	NA	5' UTR (NM_153098, exon 1 of 33)	5' UTR (NM_153098, exon 1 of 33)	191	NM_153098	235505	Mm.32955	NM_153098	ENSMUSG00000046186	Cd109	9930012E15Rik|AI480638|GARP	CD109 antigen	protein-coding
Peaks_117	chrX	137107017	137107572	+	0	NA	Intergenic	Intergenic	13032	NM_007957	13984	Mm.8017	NM_007957	ENSMUSG00000023443	Esx1	Spx1	extraembryonic, spermatogenesis, homeobox 1	protein-coding
Peaks_1170	chr15	34837234	34837839	+	0	NA	promoter-TSS (NM_001271704)	promoter-TSS (NM_001271704)	181	NM_181317	16539	Mm.71045	NM_181317	ENSMUSG00000050963	Kcns2	E130006J24Rik|Kv9.2	K+ voltage-gated channel, subfamily S, 2	protein-coding
Peaks_1172	chr4	156059811	156060041	+	0	NA	promoter-TSS (NR_132444)	promoter-TSS (NR_132444)	-124	NR_132444	100415901	Mm.437006	NR_132444	ENSMUSG00000086549	Gm13648	OTTMUSG00000013217	predicted gene 13648	ncRNA
Peaks_1174	chr10	86334547	86334935	+	0	NA	intron (NM_011595, intron 1 of 4)	intron (NM_011595, intron 1 of 4)	34329	NM_011595	21859	Mm.4871	NM_011595	ENSMUSG00000020044	Timp3	Timp-3	tissue inhibitor of metalloproteinase 3	protein-coding
Peaks_1178	chr10	24835969	24836242	+	0	NA	promoter-TSS (NM_134005)	promoter-TSS (NM_134005)	90	NM_134005	209558	Mm.338425	NM_134005	ENSMUSG00000019989	Enpp3	AI876438|CD203c	ectonucleotide pyrophosphatase/phosphodiesterase 3	protein-coding
Peaks_1179	chr5	15933985	15935606	+	0	NA	5' UTR (NM_001110843, exon 1 of 39)	5' UTR (NM_001110843, exon 1 of 39)	104	NM_001110844	12293	Mm.159842	NM_009784	ENSMUSG00000040118	Cacna2d1	Ca(v)alpha2delta1|Cacna2|Cchl2a	calcium channel, voltage-dependent, alpha2/delta subunit 1	protein-coding
Peaks_118	chr4	60149009	60149554	+	0	NA	Intergenic	Intergenic	-9423	NM_001200004	100039150	Mm.237772	NM_001200004	ENSMUSG00000096674	Mup15	Gm2068|Mup13	major urinary protein 15	protein-coding
Peaks_1180	chr4	40910260	40910768	+	0	NA	Intergenic	Intergenic	-9542	NM_011463	20731	Mm.25246	NM_011463	ENSMUSG00000028415	Spink4	MPGC60	serine peptidase inhibitor, Kazal type 4	protein-coding
Peaks_1181	chr9	86925835	86926055	+	0	NA	Intergenic	Intergenic	-45496	NM_001277983	20616	Mm.281651	NM_013669	ENSMUSG00000033419	Snap91	91kDa|AP180|F1-20|mKIAA0656	synaptosomal-associated protein 91	protein-coding
Peaks_1189	chr4	119138292	119138572	+	0	NA	Intergenic	Intergenic	29687	NM_011400	20525	Mm.21002	NM_011400	ENSMUSG00000028645	Slc2a1	Glut-1|Glut1	solute carrier family 2 (facilitated glucose transporter), member 1	protein-coding
Peaks_119	chr4	41809308	41810497	+	0	NA	Intergenic	Intergenic	-35726	NM_001347065	20301	Mm.335946	NM_011336	ENSMUSG00000073888	Ccl27a	ALP|AW558992|CTACK|CTAK|Ccl27|ESkine|ILC|PESKY|Scya27|Scya27a	chemokine (C-C motif) ligand 27A	protein-coding
Peaks_1190	chr1	37556408	37556529	+	0	NA	Intergenic	L1Md_F2|LINE|L1	-15452	NM_173870	269181	Mm.25861	NM_173870	ENSMUSG00000026110	Mgat4a	9530018I07Rik|GnT-IVa|glcNAc-T-IVa	mannoside acetylglucosaminyltransferase 4, isoenzyme A	protein-coding
Peaks_1194	chr5	7344056	7345405	+	0	NA	promoter-TSS (NM_001163223)	promoter-TSS (NM_001163223)	-352	NM_001163223	207618	Mm.478808	NM_001163223	ENSMUSG00000092094	Zfp804b	Gm441	zinc finger protein 804B	protein-coding
Peaks_1200	chr1	87134050	87134343	+	0	NA	Intergenic	IAPLTR1_Mm|LTR|ERVK	9188	NM_007432	11648	Mm.377076	NM_007432	ENSMUSG00000036500	Akp3	Akp-3|IAP|dIAP	alkaline phosphatase 3, intestine, not Mn requiring	protein-coding
Peaks_1202	chr8	25090099	25090476	+	0	NA	intron (NM_031257, intron 1 of 11)	(CA)n|Simple_repeat|Simple_repeat	11524	NM_031257	83436	Mm.261122	NM_031257	ENSMUSG00000031557	Plekha2	6430512N22Rik|AI851530|AU041791|TAPP2|W91773	pleckstrin homology domain-containing, family A (phosphoinositide binding specific) member 2	protein-coding
Peaks_1209	chr4	108406230	108406942	+	0	NA	exon (NM_024198, exon 1 of 3)	exon (NM_024198, exon 1 of 3)	127	NM_024198	67305	Mm.20164	NM_024198	ENSMUSG00000028597	Gpx7	3110050F08Rik|AI327032|GPX6	glutathione peroxidase 7	protein-coding
Peaks_121	chr14	5461522	5461785	+	0	NA	Intergenic	Intergenic	-6205	NM_001291094	100041515	Mm.443041	NM_001205306	ENSMUSG00000096629	Gm3383	ENSMUSG00000079376	predicted gene 3383	protein-coding
Peaks_1211	chr1	58323743	58323826	+	0	NA	intron (NM_001008419, intron 20 of 35)	IAPEz-int|LTR|ERVK	45458	NM_001008419	213043	Mm.414292	NM_001008419	ENSMUSG00000079554	Aox2	Aoh3|Aox3l1	aldehyde oxidase 2	protein-coding
Peaks_1215	chr3	116251463	116252925	+	0	NA	exon (NM_022427, exon 2 of 2)	exon (NM_022427, exon 2 of 2)	1290	NM_022427	64378	Mm.40025	NM_022427	ENSMUSG00000068696	Gpr88	AW061286|Strg	G-protein coupled receptor 88	protein-coding
Peaks_1217	chr5	38240724	38241105	+	0	NA	Intergenic	Intergenic	-19461	NM_025480	66309	Mm.256185	NM_025480	ENSMUSG00000067365	Tmem128	2810021O14Rik	transmembrane protein 128	protein-coding
Peaks_1226	chr5	120445383	120445654	+	0	NA	Intergenic	Intergenic	13632	NM_008499	16873	Mm.5151	NM_008499	ENSMUSG00000029595	Lhx5	Lim2	LIM homeobox protein 5	protein-coding
Peaks_1227	chr1	40452546	40453051	+	0	NA	intron (NM_001025602, intron 10 of 10)	L1Md_F3|LINE|L1	-12754	NM_001161842	16182	Mm.253664	NM_008365	ENSMUSG00000026070	Il18r1	Il18ralpha|Il1rrp	interleukin 18 receptor 1	protein-coding
Peaks_1228	chr10	103368982	103369500	+	0	NA	intron (NM_001252330, intron 1 of 11)	intron (NM_001252330, intron 1 of 11)	1433	NM_175328	103098	Mm.458408	NM_175328	ENSMUSG00000019894	Slc6a15	AA536730|AI326450|AI326451|v7-3	solute carrier family 6 (neurotransmitter transporter), member 15	protein-coding
Peaks_1231	chr8	66696771	66697456	+	0	NA	promoter-TSS (NM_010934)	promoter-TSS (NM_010934)	-309	NM_010934	18166	Mm.5112	NM_010934	ENSMUSG00000036437	Npy1r	Npyr|Y1-R	neuropeptide Y receptor Y1	protein-coding
Peaks_1234	chr11	12464333	12465246	+	0	NA	5' UTR (NM_001282993, exon 1 of 14)	5' UTR (NM_001282993, exon 1 of 14)	171	NM_172496	12808	Mm.22847	NM_172496	ENSMUSG00000020173	Cobl	-	cordon-bleu WH2 repeat	protein-coding
Peaks_1235	chr1	64961472	64961938	+	0	NA	Intergenic	IAPEz-int|LTR|ERVK	-4881	NM_001039493	241075	Mm.239534	NM_175509	ENSMUSG00000051344	Plekhm3	9430067K14Rik|A230102O09Rik|AI449570|DAPR|Plekhm1l	pleckstrin homology domain containing, family M, member 3	protein-coding
Peaks_124	chr1	21999593	22000072	+	0	NA	Intergenic	IAPEz-int|LTR|ERVK	-37182	NM_001310477	226922	Mm.336519	NM_023872	ENSMUSG00000028033	Kcnq5	7730402H11|9230107O05Rik|AA589396|D1Mgi1	potassium voltage-gated channel, subfamily Q, member 5	protein-coding
Peaks_1244	chr14	104467311	104468250	+	0	NA	5' UTR (NM_011143, exon 1 of 3)	5' UTR (NM_011143, exon 1 of 3)	219	NM_011143	18996	Mm.246550	NM_011143	ENSMUSG00000048349	Pou4f1	Brn-3|Brn-3.0|Brn3|Brn3.0|Brn3a|E130119J07Rik	POU domain, class 4, transcription factor 1	protein-coding
Peaks_1245	chr4	150136873	150137206	+	0	NA	intron (NM_019741, intron 7 of 13)	intron (NM_019741, intron 7 of 13)	-11933	NM_001085529	435818	Mm.359648	NM_001085529	ENSMUSG00000062064	Slc2a7	OTTMUSG00000010396	solute carrier family 2 (facilitated glucose transporter), member 7	protein-coding
Peaks_1246	chr6	127349602	127349808	+	0	NA	Intergenic	Intergenic	-41738	NR_073373	232386	Mm.257367	NR_073373	ENSMUSG00000107153	Gm38404	D130058E03	predicted gene, 38404	ncRNA
Peaks_1250	chr7	33956364	33956445	+	0	NA	Intergenic	RMER19B|LTR|ERVK	-11419	NM_178308	110187	Mm.155750	NM_178308	ENSMUSG00000066586	Scgb2b26	Abpbg26|Abpbg4|Abpg|C2d|Scgb2b4	secretoglobin, family 2B, member 26	protein-coding
Peaks_1252	chr5	15690098	15690251	+	0	NA	intron (NR_001585, intron 1 of 4)	intron (NR_001585, intron 1 of 4)	9464	NR_001585	75858	Mm.359463	NR_001585	ENSMUSG00000089871	Speer4cos	4930568L21Rik|SPEER-7|Speer7-ps|Speer7-ps1	spermatogenesis associated glutamate (E)-rich protein 4C, opposite strand transcript	pseudo
Peaks_1253	chr7	102222275	102222604	+	0	NA	promoter-TSS (NM_145583)	promoter-TSS (NM_145583)	-589	NR_111938	233575	Mm.302013	NM_145583	ENSMUSG00000030990	Pgap2	1810006G21Rik|C76649|Frag1	post-GPI attachment to proteins 2	protein-coding
Peaks_1255	chr3	116507664	116508357	+	0	NA	5' UTR (NM_025517, exon 1 of 11)	5' UTR (NM_025517, exon 1 of 11)	165	NM_025517	66368	Mm.251228	NM_025517	ENSMUSG00000000339	Rtca	2310009A18Rik|AI450277|RPC|Rtcd1	RNA 3'-terminal phosphate cyclase	protein-coding
Peaks_1256	chr15	40654602	40655747	+	0	NA	5' UTR (NM_011766, exon 1 of 8)	5' UTR (NM_011766, exon 1 of 8)	132	NM_011766	22762	Mm.39496	NM_011766	ENSMUSG00000022306	Zfpm2	B330005D23Rik|FOG-2|FOG2	zinc finger protein, multitype 2	protein-coding
Peaks_1257	chr13	86014679	86014814	+	0	NA	Intergenic	Lx5|LINE|L1	32049	NM_007749	12867	Mm.378898	NM_007749	ENSMUSG00000017778	Cox7c	COXVIIc|Cox7c1	cytochrome c oxidase subunit VIIc	protein-coding
Peaks_126	chr2	75747880	75748190	+	0	NA	Intergenic	Intergenic	-43372	NM_010902	18024	Mm.1025	NM_010902	ENSMUSG00000015839	Nfe2l2	Nrf2	nuclear factor, erythroid derived 2, like 2	protein-coding
Peaks_1264	chr7	82771113	82772053	+	0	NA	intron (NM_175317, intron 18 of 19)	intron (NM_175317, intron 18 of 19)	-15939	NR_046004	77800	Mm.444811	NR_046004	ENSMUSG00000086690	4933406J10Rik	A930009F24Rik	RIKEN cDNA 4933406J10 gene	ncRNA
Peaks_1266	chr5	14940479	14941168	+	0	NA	Intergenic	Intergenic	-2348	NM_001122661	624245	Mm.368256	NM_001122661	ENSMUSG00000091255	Speer4e	-	spermatogenesis associated glutamate (E)-rich protein 4e	protein-coding
Peaks_1267	chr16	78930629	78931601	+	0	NA	5' UTR (NM_139134, exon 1 of 6)	5' UTR (NM_139134, exon 1 of 6)	167	NM_139134	246048	Mm.77895	NM_139134	ENSMUSG00000022860	Chodl	3110074E07Rik|MT75|PRED12	chondrolectin	protein-coding
Peaks_1275	chr6	47749166	47749327	+	0	NA	Intergenic	CpG	3679	NR_002841	19799		NR_002841		Rn4.5s	-	4.5S RNA	rRNA
Peaks_1277	chr1	6172045	6172571	+	0	NA	Intergenic	IAPEz-int|LTR|ERVK	-42354	NM_009826	12421	Mm.293811	NM_009826	ENSMUSG00000025907	Rb1cc1	2900055E04Rik|5930404L04Rik|Cc1|FIP200|LaXp180	RB1-inducible coiled-coil 1	protein-coding
Peaks_1280	chr9	114822387	114822634	+	0	NA	intron (NM_027294, intron 1 of 3)	B4A|SINE|B4	21642	NM_027294	70031	Mm.150064	NM_027294	ENSMUSG00000041012	Cmtm8	2700018N07Rik|AA408515|Cklfsf8	CKLF-like MARVEL transmembrane domain containing 8	protein-coding
Peaks_1281	chr16	5132318	5132664	+	0	NA	promoter-TSS (NM_008909)	promoter-TSS (NM_008909)	-10	NM_008909	19041	Mm.266875	NM_008909	ENSMUSG00000039457	Ppl	AW553870	periplakin	protein-coding
Peaks_1285	chr3	98427356	98428436	+	0	NA	exon (NM_172863, exon 3 of 3)	exon (NM_172863, exon 3 of 3)	29135	NM_001111336	15495	Mm.14309	NM_008294	ENSMUSG00000095143	Hsd3b4	-	hydroxy-delta-5-steroid dehydrogenase, 3 beta- and steroid delta-isomerase 4	protein-coding
Peaks_1287	chr12	119273693	119274024	+	0	NA	Intergenic	Intergenic	-35582	NM_177290	320910	Mm.217000	NM_177290	ENSMUSG00000025321	Itgb8	4832412O06Rik	integrin beta 8	protein-coding
Peaks_1290	chr9	15627746	15628230	+	0	NA	promoter-TSS (NM_181816)	promoter-TSS (NM_181816)	-55	NM_181816	234964	Mm.32237	NM_181816	ENSMUSG00000039977	Ccdc67	4933401K09Rik|Deup1	coiled-coil domain containing 67	protein-coding
Peaks_1293	chr12	116404968	116406054	+	0	NA	promoter-TSS (NR_028421)	promoter-TSS (NR_028421)	109	NM_133762	76044	Mm.491196	NM_133762	ENSMUSG00000042029	Ncapg2	5830426I05Rik|Luzp5|Mtb|mCAP-G2	non-SMC condensin II complex, subunit G2	protein-coding
Peaks_1295	chr1	16621988	16622090	+	0	NA	Intergenic	MT2_Mm|LTR|ERVL	-2701	NM_001271017	66799	Mm.122430	NM_025773	ENSMUSG00000025939	Ube2w	6130401J04Rik	ubiquitin-conjugating enzyme E2W (putative)	protein-coding
Peaks_1296	chr1	166138026	166138294	+	0	NA	intron (NM_021610, intron 1 of 6)	intron (NM_021610, intron 1 of 6)	7700	NM_021610	59290	Mm.46357	NM_021610	ENSMUSG00000000544	Gpa33	2010310L10Rik|2210401D16Rik|BB116197	glycoprotein A33 (transmembrane)	protein-coding
Peaks_1297	chr3	80913129	80913870	+	0	NA	intron (NM_001345959, intron 1 of 10)	CpG	161	NM_001345956	14658	Mm.275639	NM_010298	ENSMUSG00000028020	Glrb	AI853901|Glyrb|spa|spastic	glycine receptor, beta subunit	protein-coding
Peaks_1308	chr1	121327193	121327539	+	0	NA	intron (NM_178082, intron 1 of 5)	intron (NM_178082, intron 1 of 5)	312	NM_001271531	72999	Mm.27136	NM_133748	ENSMUSG00000003721	Insig2	2900053I11Rik|C730043J18Rik|Insig-2	insulin induced gene 2	protein-coding
Peaks_1309	chr8	20367376	20367740	+	0	NA	Intergenic	Intergenic	-4356	NM_001177408	100040599	Mm.491087	NM_001177408	ENSMUSG00000074449	Gm15319	OTTMUSG00000020118	predicted gene 15319	protein-coding
Peaks_1310	chr1	164224669	164225761	+	0	NA	Intergenic	RLTR4_MM-int|LTR|ERV1	-23831	NM_054087	116914	Mm.35444	NM_054087	ENSMUSG00000040918	Slc19a2	AV276020|AW322295|DDA1|THTR1|TRMA	solute carrier family 19 (thiamine transporter), member 2	protein-coding
Peaks_1319	chr10	89685663	89686821	+	0	NA	promoter-TSS (NM_001310704)	promoter-TSS (NM_001310704)	43	NM_198021	213326	Mm.27651	NM_198021	ENSMUSG00000069539	Scyl2	AU015688|AW536445|BC030932|CVAK104|D10Ertd802e	SCY1-like 2 (S. cerevisiae)	protein-coding
Peaks_1327	chr5	36661452	36661631	+	0	NA	intron (NM_001081232, intron 2 of 8)	intron (NM_001081232, intron 2 of 8)	34480	NM_001081232	320661	Mm.26480	NM_177221	ENSMUSG00000029190	D5Ertd579e	9030221A05Rik|A930018H20Rik|Kiaa0232	DNA segment, Chr 5, ERATO Doi 579, expressed	protein-coding
Peaks_1329	chr7	140967843	140968181	+	0	NA	promoter-TSS (NM_001112715)	promoter-TSS (NM_001112715)	-64	NM_001112715	68713	Mm.175661	NM_026820	ENSMUSG00000025491	Ifitm1	1110036C17Rik|DSPA2a|Mil-2|Mil2	interferon induced transmembrane protein 1	protein-coding
Peaks_1332	chr12	116248164	116248710	+	0	NA	intron (NM_146039, intron 4 of 21)	intron (NM_146039, intron 4 of 21)	14588	NM_146039	217935	Mm.31382	NM_146039	ENSMUSG00000042050	Wdr60	D430033N04Rik	WD repeat domain 60	protein-coding
Peaks_1334	chr1	164226139	164226727	+	0	NA	Intergenic	RLTR4_MM-int|LTR|ERV1	-22613	NM_054087	116914	Mm.35444	NM_054087	ENSMUSG00000040918	Slc19a2	AV276020|AW322295|DDA1|THTR1|TRMA	solute carrier family 19 (thiamine transporter), member 2	protein-coding
Peaks_1339	chr11	101278746	101279152	+	0	NA	promoter-TSS (NM_026618)	promoter-TSS (NM_026618)	-1	NM_026618	52469	Mm.52	NM_026618	ENSMUSG00000017188	Coa3	1810033A19Rik|Ccdc56|D11Ertd99e|HSPC009	cytochrome C oxidase assembly factor 3	protein-coding
Peaks_134	chr1	55926436	55926637	+	0	NA	Intergenic	MERVL-int|LTR|ERVL	-4705	NR_045837	329159	Mm.98697	NR_045837	ENSMUSG00000099950	9130227L01Rik	-	RIKEN cDNA 9130227L01 gene	ncRNA
Peaks_1340	chrX	16618187	16619245	+	0	NA	promoter-TSS (NM_173740)	promoter-TSS (NM_173740)	-982	NM_173740	17161	Mm.21108	NM_173740	ENSMUSG00000025037	Maoa	1110061B18Rik|AA407771	monoamine oxidase A	protein-coding
Peaks_1352	chr1	36034148	36034313	+	0	NA	Intergenic	MERVL-int|LTR|ERVL	-34170	NM_015818	50785	Mm.213566	NM_015818	ENSMUSG00000045216	Hs6st1	6Ost1	heparan sulfate 6-O-sulfotransferase 1	protein-coding
Peaks_1353	chr3	116861214	116861387	+	0	NA	promoter-TSS (NM_009146)	promoter-TSS (NM_009146)	-380	NM_009146	20321	Mm.66293	NM_009146	ENSMUSG00000033386	Frrs1	AI131732|Sdfr2	ferric-chelate reductase 1	protein-coding
Peaks_1357	chr19	4586901	4587018	+	0	NA	intron (NM_001162946, intron 2 of 20)	intron (NM_001162946, intron 2 of 20)	-7360	NM_008797	18563	Mm.1845	NM_008797	ENSMUSG00000024892	Pcx	Pc|Pcb	pyruvate carboxylase	protein-coding
Peaks_136	chr1	16624671	16625593	+	0	NA	Intergenic	MERVL-int|LTR|ERVL	-5794	NM_001271017	66799	Mm.122430	NM_025773	ENSMUSG00000025939	Ube2w	6130401J04Rik	ubiquitin-conjugating enzyme E2W (putative)	protein-coding
Peaks_1361	chr3	138743018	138743513	+	0	NA	intron (NM_019571, intron 1 of 7)	intron (NM_019571, intron 1 of 7)	1057	NM_019571	56224	Mm.31927	NM_019571	ENSMUSG00000028152	Tspan5	2810455A09Rik|4930505M03Rik|NET-4|Tm4sf9	tetraspanin 5	protein-coding
Peaks_1367	chr2	122819559	122819790	+	0	NA	Intergenic	Intergenic	37675	NM_021507	59010	Mm.28986	NM_021507	ENSMUSG00000005803	Sqrdl	0610039J17Rik|4930557M22Rik|SQOR	sulfide quinone reductase-like (yeast)	protein-coding
Peaks_1372	chr9	70622847	70623659	+	0	NA	intron (NM_172772, intron 5 of 8)	(CTGTG)n|Simple_repeat|Simple_repeat	33921	NM_172772	235461	Mm.170855	NM_172772	ENSMUSG00000042444	Fam63b	AI465301|B230380D07Rik|mKIAA1164	family with sequence similarity 63, member B	protein-coding
Peaks_1374	chr7	78948683	78948907	+	0	NA	Intergenic	RMER1B|Other|Other	34560	NM_001113527	57444	Mm.322843	NM_020583	ENSMUSG00000039236	Isg20	1600023I01Rik|2010107M23Rik|20kDa|DnaQL|HEM45	interferon-stimulated protein	protein-coding
Peaks_1375	chr4	115000441	115000752	+	0	NA	intron (NM_001304559, intron 1 of 15)	intron (NM_001304559, intron 1 of 15)	478	NM_001304555	20460	Mm.3988	NM_009185	ENSMUSG00000028718	Stil	Sil	Scl/Tal1 interrupting locus	protein-coding
Peaks_1376	chr8	12915421	12915863	+	0	NA	promoter-TSS (NM_178076)	promoter-TSS (NM_178076)	-251	NM_178076	17207	Mm.334413	NM_178076	ENSMUSG00000031442	Mcf2l	C130040G20Rik|Dbs|Ost|mKIAA0362	mcf.2 transforming sequence-like	protein-coding
Peaks_1380	chr5	14985317	14985534	+	0	NA	Intergenic	Lx2A1|LINE|L1	-6526	NM_001281514	100503549	Mm.491086	NM_001281514	ENSMUSG00000072188	Gm10354	ENSMUSG00000072188	predicted gene 10354	protein-coding
Peaks_1382	chr1	160351757	160352332	+	0	NA	promoter-TSS (NM_001038621)	promoter-TSS (NM_001038621)	-473	NM_001038621	29809	Mm.25833	NM_013862	ENSMUSG00000026721	Rabgap1l	5830411O09Rik|8430421H08Rik|9630005B12Rik|AW049894|HHL|Hh1|mKIAA0471	RAB GTPase activating protein 1-like	protein-coding
Peaks_1384	chr6	114497932	114498219	+	0	NA	Intergenic	IMPB_01|Satellite|Satellite	39553	NM_001317124	15465	Mm.333327	NM_008285	ENSMUSG00000053004	Hrh1	Bphs|H1R|HH1R|Hir	histamine receptor H1	protein-coding
Peaks_1386	chr4	114405728	114407142	+	0	NA	promoter-TSS (NM_001085549)	promoter-TSS (NM_001085549)	-289	NM_001085549	666048	Mm.331779	NM_001085549	ENSMUSG00000070867	Trabd2b	Gm12824|Hkat|OTTMUSG00000008561	TraB domain containing 2B	protein-coding
Peaks_139	chr5	14905368	14905845	+	0	NA	Intergenic	Lx5c|LINE|L1	9283	NM_198666	381714	Mm.368256	NM_198666	ENSMUSG00000033219	Gm9758	ENSMUSG00000033219	predicted gene 9758	protein-coding
Peaks_1391	chr7	28139596	28140004	+	0	NA	exon (NM_001164655, exon 5 of 20)	exon (NM_001164655, exon 5 of 20)	10334	NM_001164655	319482	Mm.483194	NM_176924	ENSMUSG00000078776	9530053A07Rik	FCGBP	RIKEN cDNA 9530053A07 gene	protein-coding
Peaks_1395	chr2	66123946	66125360	+	0	NA	5' UTR (NM_015736, exon 1 of 11)	5' UTR (NM_015736, exon 1 of 11)	140	NM_015736	14425	Mm.439760	NM_015736	ENSMUSG00000026994	Galnt3	-	UDP-N-acetyl-alpha-D-galactosamine:polypeptide N-acetylgalactosaminyltransferase 3	protein-coding
Peaks_14	chr4	156341999	156342342	+	0	NA	Intergenic	Intergenic	11044	NM_009485	22300	Mm.377117	NM_009485		Vmn2r123	V2r1	vomeronasal 2, receptor 123	protein-coding
Peaks_1400	chr6	83530214	83530522	+	0	NA	intron (NM_009610, intron 1 of 8)	(CA)n|Simple_repeat|Simple_repeat	5883	NM_009610	11468	Mm.292865	NM_009610	ENSMUSG00000059430	Actg2	ACTA3|Act-4|Act4|SMGA	actin, gamma 2, smooth muscle, enteric	protein-coding
Peaks_1405	chr8	109595898	109596223	+	0	NA	exon (NM_020046, exon 5 of 9)	exon (NM_020046, exon 5 of 9)	12613	NM_020046	56749	Mm.23894	NM_020046	ENSMUSG00000031730	Dhodh	2810417D19Rik|AI834883	dihydroorotate dehydrogenase	protein-coding
Peaks_1406	chr10	81960960	81961089	+	0	NA	Intergenic	RLTR10-int|LTR|ERVK	-30512	NM_001346707	100040944		NM_001346707		Gm3055	-	predicted gene 3055	protein-coding
Peaks_1408	chr2	156968056	156968364	+	0	NA	intron (NM_013865, intron 2 of 15)	MTE2a|LTR|ERVL-MaLR	23901	NM_013865	29812	Mm.279256	NM_013865	ENSMUSG00000027634	Ndrg3	4833415O14Rik|AI747193|Ndr3	N-myc downstream regulated gene 3	protein-coding
Peaks_1409	chr8	54509166	54509620	+	0	NA	Intergenic	Intergenic	20605	NM_029701	76687	Mm.86437	NM_029701	ENSMUSG00000054408	Spcs3	1810011E08Rik|SPC22/23	signal peptidase complex subunit 3 homolog (S. cerevisiae)	protein-coding
Peaks_1411	chr2	133554290	133554981	+	0	NA	exon (NM_007553, exon 2 of 3)	exon (NM_007553, exon 2 of 3)	2476	NM_007553	12156	Mm.103205	NM_007553	ENSMUSG00000027358	Bmp2	AI467020|Bmp2a	bone morphogenetic protein 2	protein-coding
Peaks_1413	chr1	4440734	4441273	+	0	NA	Intergenic	L1Md_F2|LINE|L1	-31762	NM_001195662	19888	Mm.294263	NM_011283	ENSMUSG00000025900	Rp1	Dcdc3|Orp1|Rp1h|mG145	retinitis pigmentosa 1 (human)	protein-coding
Peaks_1416	chr7	20654409	20654721	+	0	NA	Intergenic	L1_Mus1|LINE|L1	-14353	NM_001166753	667530	Mm.484970	NM_001166753	ENSMUSG00000094905	Vmn1r155	EG667530|Gm8687	vomeronasal 1 receptor 155	protein-coding
Peaks_1419	chrX	154102880	154102998	+	0	NA	Intergenic	L1Md_A|LINE|L1	17746	NM_001201358	667256	Mm.46855	NM_001201358	ENSMUSG00000094577	4921511M17Rik	-	RIKEN cDNA 4921511M17 gene	protein-coding
Peaks_1421	chr1	164223890	164224516	+	0	NA	Intergenic	RLTR4_Mm|LTR|ERV1	-24843	NM_054087	116914	Mm.35444	NM_054087	ENSMUSG00000040918	Slc19a2	AV276020|AW322295|DDA1|THTR1|TRMA	solute carrier family 19 (thiamine transporter), member 2	protein-coding
Peaks_1422	chr4	43079339	43079585	+	0	NA	intron (NM_001310758, intron 1 of 38)	intron (NM_001310758, intron 1 of 38)	20509	NM_001310758	22249	Mm.128892	NM_021468	ENSMUSG00000028456	Unc13b	Munc13-1|Munc13-2|Unc13a|Unc13h1|Unc13h2	unc-13 homolog B (C. elegans)	protein-coding
Peaks_1426	chr14	76010487	76011170	+	0	NA	promoter-TSS (NM_026816)	promoter-TSS (NM_026816)	37	NM_026816	68705	Mm.20415	NM_026816	ENSMUSG00000067995	Gtf2f2	1110031C13Rik|AI326315	general transcription factor IIF, polypeptide 2	protein-coding
Peaks_1428	chr1	9715241	9716157	+	0	NA	Intergenic	L1Md_F2|LINE|L1	-15490	NM_008651	17864	Mm.479	NM_008651	ENSMUSG00000025912	Mybl1	A-myb|G1-419-6|repro9	myeloblastosis oncogene-like 1	protein-coding
Peaks_1434	chr9	72969883	72970150	+	0	NA	intron (NM_026314, intron 7 of 8)	intron (NM_026314, intron 7 of 8)	11231	NM_001163725	67685	Mm.31817	NM_026314	ENSMUSG00000089865	Dyx1c1	1700010I24Rik|Dnaaf4|EKN1|b2b811.1Clo|b2b811Clo	dyslexia susceptibility 1 candidate 1	protein-coding
Peaks_1436	chr17	90454430	90456169	+	0	NA	5' UTR (NM_001346961, exon 1 of 6)	5' UTR (NM_001346961, exon 1 of 6)	581	NM_001346958	18189	Mm.478418	NM_020252	ENSMUSG00000024109	Nrxn1	1700062G21Rik|9330127H16Rik|A230068P09Rik|mKIAA0578	neurexin I	protein-coding
Peaks_1439	chr19	33761279	33761937	+	0	NA	5' UTR (NM_001322338, exon 1 of 11)	5' UTR (NM_001322338, exon 1 of 11)	343	NM_001322338	101055671		NM_001322338	ENSMUSG00000087303	Lipo2	EG668114|Gm8981	lipase, member O2	protein-coding
Peaks_1441	chr1	151326906	151327548	+	0	NA	Intergenic	RLTR4_Mm|LTR|ERV1	-17271	NM_001039512	117198	Mm.33764	NM_028582	ENSMUSG00000023150	Ivns1abp	1190004M08Rik|1700126I16Rik|AA960440|HSPC068|ND1|NS-1|NS1-BP|Nd1-L|Nd1-S|mKIAA0850	influenza virus NS1A binding protein	protein-coding
Peaks_1443	chr15	100165077	100165503	+	0	NA	intron (NM_001159361, intron 12 of 37)	intron (NM_001159361, intron 12 of 37)	10894	NM_172819	239667	Mm.243658	NM_172819	ENSMUSG00000023026	Dip2b	4932422C22|AI317237|AI854602|mKIAA1463	disco interacting protein 2 homolog B	protein-coding
Peaks_1446	chr19	56308740	56309043	+	0	NA	exon (NM_001329936, exon 4 of 7)	exon (NM_001329936, exon 4 of 7)	20979	NM_146101	226243	Mm.25791	NM_146101	ENSMUSG00000025075	Habp2	AI035669|FSAP|HABP|HGFAL|PHBP	hyaluronic acid binding protein 2	protein-coding
Peaks_1449	chr12	55124288	55125135	+	0	NA	exon (NM_028527, exon 1 of 5)	exon (NM_028527, exon 1 of 5)	183	NM_028527	73385	Mm.439875	NM_028527	ENSMUSG00000095595	Fam177a	1700047I17Rik|1700047I17Rik1|C14orf24|D730001C10Rik|Fam177a1	family with sequence similarity 177, member A	protein-coding
Peaks_145	chrX	75744389	75745139	+	0	NA	intron (NR_029443, intron 5 of 8)	intron (NR_029443, intron 5 of 8)	19935	NR_029443	74396	Mm.162493	NR_029443	ENSMUSG00000087396	4933407K13Rik	A130080L05Rik	RIKEN cDNA 4933407K13 gene	ncRNA
Peaks_1454	chr4	41808595	41809255	+	0	NA	Intergenic	Intergenic	-34749	NM_001347065	20301	Mm.335946	NM_011336	ENSMUSG00000073888	Ccl27a	ALP|AW558992|CTACK|CTAK|Ccl27|ESkine|ILC|PESKY|Scya27|Scya27a	chemokine (C-C motif) ligand 27A	protein-coding
Peaks_1457	chr15	96185513	96185852	+	0	NA	intron (NR_028311, intron 1 of 1)	intron (NR_028311, intron 1 of 1)	2882	NR_028311	100043335	Mm.247464	NR_028311		Gm4371	EG667874|Gm8854	eukaryotic translation initiation factor 3, subunit I pseudogene	pseudo
Peaks_1459	chr3	123446729	123447839	+	0	NA	exon (NM_008939, exon 1 of 11)	exon (NM_008939, exon 1 of 11)	371	NM_008939	19142	Mm.9431	NM_008939	ENSMUSG00000027978	Prss12	Bssp-3|motopsin	protease, serine 12 neurotrypsin (motopsin)	protein-coding
Peaks_1461	chr3	152165269	152166350	+	0	NA	promoter-TSS (NM_016867)	promoter-TSS (NM_016867)	91	NM_016867	54120	Mm.97	NM_016867	ENSMUSG00000039131	Gipc2	2200002N01Rik|AU021850|Semcap2	GIPC PDZ domain containing family, member 2	protein-coding
Peaks_1462	chr3	125403691	125404512	+	0	NA	promoter-TSS (NM_022565)	promoter-TSS (NM_022565)	10	NM_022565	64580	Mm.444289	NM_022565	ENSMUSG00000027971	Ndst4	4930439H17Rik	N-deacetylase/N-sulfotransferase (heparin glucosaminyl) 4	protein-coding
Peaks_1463	chr8	27073516	27073845	+	0	NA	Intergenic	(TG)n|Simple_repeat|Simple_repeat	-12161	NM_054044	78560	Mm.87046	NM_054044	ENSMUSG00000031486	Adgra2	8430414O08Rik|9530074E10Rik|Gpr124|Tem5|mKIAA1531	adhesion G protein-coupled receptor A2	protein-coding
Peaks_1465	chr11	7063236	7064275	+	0	NA	exon (NM_009622, exon 1 of 20)	exon (NM_009622, exon 1 of 20)	266	NM_009622	432530	Mm.259733	NM_009622	ENSMUSG00000020431	Adcy1	AC1|D11Bwg1392e|I-AC|brl|mKIAA4070	adenylate cyclase 1	protein-coding
Peaks_1473	chr2	27129462	27129812	+	0	NA	intron (NM_175427, intron 1 of 2)	intron (NM_175427, intron 1 of 2)	12840	NM_175427	109349	Mm.314080	NM_175427	ENSMUSG00000009216	Fam163b	C630035N08Rik	family with sequence similarity 163, member B	protein-coding
Peaks_1479	chrX	170009072	170009428	+	0	NA	Intergenic	(CCG)n|Simple_repeat|Simple_repeat	-30333	NR_029457	654820	Mm.34441	NM_001039559	ENSMUSG00000072844	G530011O06Rik	-	RIKEN cDNA G530011O06 gene	ncRNA
Peaks_1480	chr6	148354509	148355024	+	0	NA	non-coding (NR_003634, exon 1 of 1)	non-coding (NR_003634, exon 1 of 1)	110	NR_003634	66184	Mm.391542	NM_025405	ENSMUSG00000063171	Rps4l	1110033J19Rik|AA407494|Rps4y2	ribosomal protein S4-like	pseudo
Peaks_1481	chr6	36387976	36389502	+	0	NA	promoter-TSS (NR_015589)	promoter-TSS (NR_015589)	-505	NR_015589	319472	Mm.226434	NR_015589	ENSMUSG00000073154	9330158H04Rik	-	RIKEN cDNA 9330158H04 gene	ncRNA
Peaks_1483	chr4	156343446	156343896	+	0	NA	Intergenic	Intergenic	12545	NM_009485	22300	Mm.377117	NM_009485		Vmn2r123	V2r1	vomeronasal 2, receptor 123	protein-coding
Peaks_1484	chr10	112315248	112315534	+	0	NA	intron (NM_001025581, intron 2 of 4)	MIR3|SINE|MIR	44268	NM_001025581	268345	Mm.336242	NM_001025581	ENSMUSG00000035681	Kcnc2	AW047325|B230117I07|KShIIIA|Kv3.2	potassium voltage gated channel, Shaw-related subfamily, member 2	protein-coding
Peaks_1487	chr8	114205136	114206110	+	0	NA	promoter-TSS (NM_173016)	promoter-TSS (NM_173016)	-17	NM_173016	270097	Mm.334825	NM_173016	ENSMUSG00000046844	Vat1l	9430073I07|AI427515|mKIAA1576	vesicle amine transport protein 1 like	protein-coding
Peaks_1488	chr2	115513726	115514229	+	0	NA	Intergenic	Intergenic	-1776	NR_030712	100043232	Mm.240112	NR_030712	ENSMUSG00000085582	3110099E03Rik	-	RIKEN cDNA 3110099E03 gene	ncRNA
Peaks_1491	chr4	45184371	45185606	+	0	NA	promoter-TSS (NM_001081172)	promoter-TSS (NM_001081172)	82	NM_001081172	666060	Mm.24783	NM_001081172	ENSMUSG00000035615	Frmpd1	BC031840|mKIAA0967	FERM and PDZ domain containing 1	protein-coding
Peaks_1496	chr4	156077438	156078416	+	0	NA	Intergenic	CpG	-18125	NR_132444	100415901	Mm.437006	NR_132444	ENSMUSG00000086549	Gm13648	OTTMUSG00000013217	predicted gene 13648	ncRNA
Peaks_1499	chr18	89768796	89770131	+	0	NA	promoter-TSS (NM_001039173)	promoter-TSS (NM_001039173)	-327	NM_001039173	623279	Mm.447164	NM_001039173	ENSMUSG00000073514	Dok6	Dok-6	docking protein 6	protein-coding
Peaks_15	chr1	152663627	152663879	+	0	NA	intron (NM_001346118, intron 2 of 18)	IAPEz-int|LTR|ERVK	-38536	NM_016846	19731	Mm.245270	NM_016846	ENSMUSG00000026482	Rgl1	Rgl|mKIAA0959	ral guanine nucleotide dissociation stimulator,-like 1	protein-coding
Peaks_1504	chr18	66041191	66041357	+	0	NA	Intergenic	Intergenic	-38639	NM_001172062	70361	Mm.290857	NM_027400	ENSMUSG00000041891	Lman1	2610020P13Rik|AI326273|AU043785|C730041J05|ERGIC53|F5F8D|MCFD1|MR60|P58|gp58	lectin, mannose-binding, 1	protein-coding
Peaks_1508	chr3	28262543	28263622	+	0	NA	promoter-TSS (NM_001163009)	promoter-TSS (NM_001163009)	-132	NM_001163007	665113	Mm.126193	NM_026910	ENSMUSG00000027692	Tnik	1500031A17Rik|4831440I19Rik|AI451411|C530008O15Rik|C630040K21Rik	TRAF2 and NCK interacting kinase	protein-coding
Peaks_1510	chr1	6326113	6326283	+	0	NA	Intergenic	MTA_Mm-int|LTR|ERVL-MaLR	-33133	NM_001195732	620393	Mm.388992	NM_001195732	ENSMUSG00000087247	Fam150a	EG620393	family with sequence similarity 150, member A	protein-coding
Peaks_1511	chr7	105603278	105603523	+	0	NA	Intergenic	Intergenic	-3284	NM_017371	15458	Mm.3485	NM_017371	ENSMUSG00000030895	Hpx	Hpxn|hx	hemopexin	protein-coding
Peaks_1514	chr15	78842351	78843186	+	0	NA	intron (NM_027219, intron 1 of 2)	CpG	121	NM_027219	104445	Mm.307488	NM_027219	ENSMUSG00000049521	Cdc42ep1	1810058K22Rik|AA980734|Borg5|CEP1|MSE55	CDC42 effector protein (Rho GTPase binding) 1	protein-coding
Peaks_1516	chr12	38780027	38780565	+	0	NA	5' UTR (NM_007960, exon 1 of 13)	5' UTR (NM_007960, exon 1 of 13)	214	NM_007960	14009	Mm.4866	NM_007960	ENSMUSG00000004151	Etv1	ER81|Etsrp81	ets variant 1	protein-coding
Peaks_1517	chr1	171063786	171066197	+	0	NA	promoter-TSS (NR_106103)	promoter-TSS (NR_106103)	-339	NR_106103	102466998		NR_106103	ENSMUSG00000099119	Mir6546	Gm27408|mmu-mir-6546	microRNA 6546	ncRNA
Peaks_1519	chr15	42676152	42676511	+	0	NA	exon (NM_001286062, exon 1 of 9)	exon (NM_001286062, exon 1 of 9)	646	NM_001286062	11600	Mm.309336	NM_009640	ENSMUSG00000022309	Angpt1	1110046O21Rik|Ang-1|Ang1	angiopoietin 1	protein-coding
Peaks_1521	chr10	41071435	41072365	+	0	NA	promoter-TSS (NM_199058)	promoter-TSS (NM_199058)	-316	NM_199058	140741	Mm.290693	NM_199058	ENSMUSG00000046922	Gpr6	AI852874|Gm233	G protein-coupled receptor 6	protein-coding
Peaks_1524	chr5	141240823	141242068	+	0	NA	promoter-TSS (NM_177879)	promoter-TSS (NM_177879)	-89	NM_177879	330222	Mm.151931	NM_177879	ENSMUSG00000039683	Sdk1	5330440E10|6720466O15Rik	sidekick cell adhesion molecule 1	protein-coding
Peaks_1526	chr14	103550597	103550859	+	0	NA	intron (NM_022886, intron 8 of 30)	LTR55|LTR|ERVL?	37387	NM_022886	64929	Mm.244003	NM_022886	ENSMUSG00000022123	Scel	9230114I02Rik	sciellin	protein-coding
Peaks_1529	chr6	108064873	108065846	+	0	NA	intron (NM_178391, intron 1 of 1)	intron (NM_178391, intron 1 of 1)	314	NM_178391	74729	Mm.56539	NM_178391	ENSMUSG00000034639	Setmar	5830404F24Rik|Etet2	SET domain without mariner transposase fusion	protein-coding
Peaks_153	chr6	61179895	61181045	+	0	NA	5' UTR (NM_183310, exon 1 of 11)	5' UTR (NM_183310, exon 1 of 11)	145	NM_183310	232035	Mm.150324	NM_183310	ENSMUSG00000039578	Ccser1	6230405M12Rik|C130092O11Rik|Fam190a	coiled-coil serine rich 1	protein-coding
Peaks_1531	chr1	131644455	131645378	+	0	NA	intron (NM_007799, intron 1 of 9)	RLTR4_MM-int|LTR|ERV1	6602	NM_007799	13034	Mm.230249	NM_007799	ENSMUSG00000004552	Ctse	A430072O03Rik|C920004C08Rik|CE|CatE	cathepsin E	protein-coding
Peaks_1542	chr1	69699847	69699954	+	0	NA	Intergenic	IAPEz-int|LTR|ERVK	-13940	NM_011770	22779	Mm.106343	NM_011770	ENSMUSG00000025997	Ikzf2	A730095J18Rik|Helios|Zfpn1a2|Znfn1a2	IKAROS family zinc finger 2	protein-coding
Peaks_1546	chr17	94834091	94835086	+	0	NA	intron (NR_045963, intron 1 of 4)	intron (NR_045963, intron 1 of 4)	211	NR_045964	100038746	Mm.456686	NR_045963	ENSMUSG00000066057	Gm1976	100038868	predicted gene 1976	ncRNA
Peaks_1553	chr1	105389206	105390323	+	0	NA	Intergenic	MTA_Mm-int|LTR|ERVL-MaLR	-33054	NM_001160368	320311	Mm.389162	NM_178779	ENSMUSG00000047496	Rnf152	A930029B02Rik	ring finger protein 152	protein-coding
Peaks_1559	chr4	136424457	136425217	+	0	NA	intron (NM_001285484, intron 1 of 1)	CpG	225	NM_001285484	15552	Mm.40573	NM_008309	ENSMUSG00000070687	Htr1d	5-HT-1D|5-HT1D|AI853647|Gpcr14|Htr1db	5-hydroxytryptamine (serotonin) receptor 1D	protein-coding
Peaks_1561	chr17	33780997	33781515	+	0	NA	exon (NM_020581, exon 1 of 7)	exon (NM_020581, exon 1 of 7)	319	NM_020581	57875	Mm.196189	NM_020581	ENSMUSG00000002289	Angptl4	Arp4|Bk89|Fiaf|Hfarp|Ng27|Pgar|Pgarg|Pp1158	angiopoietin-like 4	protein-coding
Peaks_1562	chr2	172201613	172201825	+	0	NA	Intergenic	Intergenic	-46773	NM_008561	17201	Mm.57183	NM_008561	ENSMUSG00000038537	Mc3r	MC3-R	melanocortin 3 receptor	protein-coding
Peaks_1566	chr1	52593310	52593913	+	0	NA	Intergenic	IAPEz-int|LTR|ERVK	-37094	NR_024590	227094	Mm.83541	NM_172654	ENSMUSG00000043015	Nemp2	5330401P04Rik|9830163O08|Tmem194b	nuclear envelope integral membrane protein 2	protein-coding
Peaks_1571	chr7	4119428	4119781	+	0	NA	promoter-TSS (NM_001109765)	promoter-TSS (NM_001109765)	74	NM_001001454	57776	Mm.29729	NM_021324	ENSMUSG00000030428	Ttyh1	4930459B04Rik|6330408P11Rik|TTY1|mTTY1|tty	tweety family member 1	protein-coding
Peaks_1573	chr1	153202209	153202548	+	0	NA	Intergenic	Intergenic	-15931	NM_008485	16782	Mm.329272	NM_008485	ENSMUSG00000026479	Lamc2	AA589349	laminin, gamma 2	protein-coding
Peaks_1574	chr6	142386773	142387814	+	0	NA	promoter-TSS (NM_001204907)	promoter-TSS (NM_001204907)	50	NM_025872	66964	Mm.3676	NM_025872	ENSMUSG00000030245	Golt1b	2310061A22Rik|AA407874|AU024291|CGI-141	golgi transport 1B	protein-coding
Peaks_1576	chr1	23305430	23305870	+	0	NA	Intergenic	IAPEz-int|LTR|ERVK	13949	NR_029717	723964		NR_029717	ENSMUSG00000065567	Mir30c-2	Mirn30c-2|mir-30c-2	microRNA 30c-2	ncRNA
Peaks_1578	chr17	40880004	40880742	+	0	NA	exon (NM_027834, exon 1 of 2)	exon (NM_027834, exon 1 of 2)	185	NM_027834	71583	Mm.158733	NM_027834	ENSMUSG00000054951	9130008F23Rik	-	RIKEN cDNA 9130008F23 gene	protein-coding
Peaks_1579	chr8	110726997	110727204	+	0	NA	intron (NM_001310591, intron 3 of 13)	intron (NM_001310591, intron 3 of 13)	1374	NM_001310591	244654	Mm.490385	NM_198625	ENSMUSG00000033763	Mtss1l	ABBA	metastasis suppressor 1-like	protein-coding
Peaks_158	chr1	54893669	54894555	+	0	NA	intron (NM_001081433, intron 1 of 27)	MERVL-int|LTR|ERVL	32275	NM_001081433	329154	Mm.397910	NM_001081433	ENSMUSG00000052331	Ankrd44	4930444A19Rik|A130096K20|E130014H08Rik|PP6-ARS-B	ankyrin repeat domain 44	protein-coding
Peaks_1581	chr16	33829385	33830339	+	0	NA	5' UTR (NM_001145884, exon 1 of 15)	5' UTR (NM_001145884, exon 1 of 15)	197	NM_001145884	16419	Mm.6424	NM_010580	ENSMUSG00000022817	Itgb5	AA475909|AI874634|ESTM23|[b]-5|[b]5|[b]5A|[b]5B|beta-5|beta5	integrin beta 5	protein-coding
Peaks_1583	chr10	85413290	85413577	+	0	NA	intron (NM_028709, intron 1 of 16)	intron (NM_028709, intron 1 of 16)	26619	NM_028709	74007	Mm.36544	NM_028709	ENSMUSG00000020042	Btbd11	6330404E16Rik	BTB (POZ) domain containing 11	protein-coding
Peaks_1585	chr14	6756301	6757581	+	0	NA	intron (NM_001309401, intron 1 of 4)	CpG	116	NM_001309401	100041151	Mm.396155	NM_001309401	ENSMUSG00000091754	Gm3636	100042043	predicted gene 3636	protein-coding
Peaks_1587	chr9	71230179	71230309	+	0	NA	intron (NM_009022, intron 1 of 13)	intron (NM_009022, intron 1 of 13)	14455	NM_009022	19378	Mm.42016	NM_009022	ENSMUSG00000013584	Aldh1a2	AV116159|Aldh1a7|Raldh1|Raldh2	aldehyde dehydrogenase family 1, subfamily A2	protein-coding
Peaks_1589	chr1	184771441	184771883	+	0	NA	Intergenic	Intergenic	-39169	NM_008250	15284	Mm.1347	NM_008250	ENSMUSG00000039377	Hlx	Hlx1	H2.0-like homeobox	protein-coding
Peaks_1591	chr19	45023929	45024383	+	0	NA	exon (NM_001130526, exon 3 of 5)	exon (NM_001130526, exon 3 of 5)	6021	NM_001130526	226154	Mm.28204	NM_145503	ENSMUSG00000035342	Lzts2	BC014695|LAPSER1|mKIAA1813	leucine zipper, putative tumor suppressor 2	protein-coding
Peaks_1592	chr14	74764273	74764551	+	0	NA	intron (NM_001252132, intron 18 of 18)	intron (NM_001252132, intron 18 of 18)	32115	NM_016903	13885	Mm.38055	NM_016903	ENSMUSG00000021996	Esd	Es-10|Es10|FGH|sid478	esterase D/formylglutathione hydrolase	protein-coding
Peaks_1593	chr4	138411037	138411382	+	0	NA	Intergenic	Intergenic	-14751	NM_001081672	625638	Mm.379091	NM_001081672	ENSMUSG00000078235	Fam43b	OTTMUSG00000009974	family with sequence similarity 43, member B	protein-coding
Peaks_1594	chr6	128651301	128651443	+	0	NA	Intergenic	ERVB4_2-LTR_MM|LTR|ERVK	-11013	NM_053165	94071	Mm.197689	NM_053165	ENSMUSG00000030364	Clec2h	Clrf|clr-f	C-type lectin domain family 2, member h	protein-coding
Peaks_1595	chr1	73007695	73007889	+	0	NA	Intergenic	RLTR10C|LTR|ERVK	8107	NM_009407	21958	Mm.425024	NM_009407	ENSMUSG00000026182	Tnp1	Stp-1|TP1|Tp-1	transition protein 1	protein-coding
Peaks_1596	chr12	72664245	72664328	+	0	NA	intron (NM_025522, intron 1 of 6)	intron (NM_025522, intron 1 of 6)	542	NM_025522	66375	Mm.289653	NM_025522	ENSMUSG00000021094	Dhrs7	2310016E22Rik|5730564L20Rik|AW061210|Retdsr4|Retsdr4	dehydrogenase/reductase (SDR family) member 7	protein-coding
Peaks_1598	chr2	68550246	68550491	+	0	NA	Intergenic	RLTR6-int|LTR|ERV1	-32045	NM_177651	227998	Mm.67562	NM_177651	ENSMUSG00000053896	4933409G03Rik	-	RIKEN cDNA 4933409G03 gene	protein-coding
Peaks_1599	chr14	48120621	48121862	+	0	NA	intron (NM_033602, intron 1 of 5)	CpG	372	NM_033602	93834	Mm.296457	NM_033602	ENSMUSG00000021846	Peli2	AW047589|BB129927	pellino 2	protein-coding
Peaks_160	chr11	5777503	5777729	+	0	NA	intron (NR_015577, intron 4 of 6)	intron (NR_015577, intron 4 of 6)	-10867	NM_001146309	13169	Mm.256925	NM_013810	ENSMUSG00000020476	Dbnl	Abp1|SH3P7|mAbp1	drebrin-like	protein-coding
Peaks_1600	chr1	90989698	90990218	+	0	NA	Intergenic	MMERVK10C-int|LTR|ERVK	-8769	NM_001111312	16978	Mm.45039	NM_008515	ENSMUSG00000026305	Lrrfip1	AU024550|Fliiap1	leucine rich repeat (in FLII) interacting protein 1	protein-coding
Peaks_1602	chr5	14918693	14919241	+	0	NA	Intergenic	ORR1A1-int|LTR|ERVL-MaLR	-4078	NM_198666	381714	Mm.368256	NM_198666	ENSMUSG00000033219	Gm9758	ENSMUSG00000033219	predicted gene 9758	protein-coding
Peaks_1605	chr10	78752366	78753165	+	0	NA	exon (NM_027630, exon 1 of 7)	exon (NM_027630, exon 1 of 7)	302	NM_027630	70976	Mm.188505	NM_027630	ENSMUSG00000078442	Ccdc105	4931413A09Rik	coiled-coil domain containing 105	protein-coding
Peaks_1607	chr11	6384893	6385049	+	0	NA	Intergenic	MERVL-int|LTR|ERVL	-10154	NM_001005867	52915	Mm.1144	NM_028601	ENSMUSG00000041164	Zmiz2	Zimp7	zinc finger, MIZ-type containing 2	protein-coding
Peaks_161	chr6	8755873	8756102	+	0	NA	intron (NM_001252266, intron 1 of 11)	intron (NM_001252266, intron 1 of 11)	2471	NM_001252266	15893	Mm.275683	NM_010492	ENSMUSG00000062995	Ica1	69kDa|ICA69	islet cell autoantigen 1	protein-coding
Peaks_1613	chr5	12383071	12384090	+	0	NA	5' UTR (NM_028882, exon 1 of 18)	5' UTR (NM_028882, exon 1 of 18)	414	NM_028882	108151	Mm.89313	NM_028882	ENSMUSG00000040254	Sema3d	4631426B19Rik	sema domain, immunoglobulin domain (Ig), short basic domain, secreted, (semaphorin) 3D	protein-coding
Peaks_1614	chr6	78353047	78353456	+	0	NA	Intergenic	L1Md_T|LINE|L1	-17634	NM_011036	18489	Mm.2553	NM_011036	ENSMUSG00000071356	Reg3b	HIP|PAP1|Pap|REG-III	regenerating islet-derived 3 beta	protein-coding
Peaks_162	chr7	59722805	59723015	+	0	NA	Intergenic	Intergenic	3342	NR_002895	64243	Mm.423722	NR_002895	ENSMUSG00000096019	Snord116	MBII-85|Pwcr1	small nucleolar RNA, C/D box 116	snoRNA
Peaks_1622	chr8	64205247	64206061	+	0	NA	5' UTR (NM_009390, exon 1 of 21)	5' UTR (NM_009390, exon 1 of 21)	339	NM_009390	21892	Mm.418367	NM_009390	ENSMUSG00000053626	Tll1	Tll|Tll-1	tolloid-like	protein-coding
Peaks_1628	chr4	121097699	121098335	+	0	NA	5' UTR (NM_172700, exon 1 of 10)	5' UTR (NM_172700, exon 1 of 10)	226	NM_172700	230709	Mm.34399	NM_172700	ENSMUSG00000043207	Zmpste24	A530043O15Rik|D030046F19|FACE1|Face-1|MADB|STE24|Ste24p	zinc metallopeptidase, STE24	protein-coding
Peaks_1629	chr11	33607735	33608277	+	0	NA	Intergenic	Intergenic	-29049	NM_146017	216643	Mm.99989	NM_146017	ENSMUSG00000020159	Gabrp	-	gamma-aminobutyric acid (GABA) A receptor, pi	protein-coding
Peaks_1634	chr2	57221461	57222124	+	0	NA	Intergenic	RLTR4_MM-int|LTR|ERV1	-15886	NM_001145820	14571	Mm.3711	NM_010274	ENSMUSG00000026827	Gpd2	AA408484|AI448216|AU021455|AW494132|GPDH|Gdm1|Gpd-m|Gpdh-m|TISP38	glycerol phosphate dehydrogenase 2, mitochondrial	protein-coding
Peaks_1636	chr1	74653466	74653697	+	0	NA	Intergenic	IAPLTR1_Mm|LTR|ERVK	-8173	NM_001014974	67534	Mm.260714	NM_001014974	ENSMUSG00000033257	Ttll4	4632407P03Rik|AI451681|mKIAA0173	tubulin tyrosine ligase-like family, member 4	protein-coding
Peaks_1639	chr17	43801570	43802358	+	0	NA	5' UTR (NM_207649, exon 1 of 5)	5' UTR (NM_207649, exon 1 of 5)	113	NM_207649	53901	Mm.251242	NM_030598	ENSMUSG00000039601	Rcan2	Csp2|Dscr1l1|MCIP2|ZAKI-4	regulator of calcineurin 2	protein-coding
Peaks_1640	chr17	13550654	13551690	+	0	NA	intron (NR_045436, intron 1 of 4)	(CTGTG)n|Simple_repeat|Simple_repeat	2922	NR_045436	72578	Mm.46549	NR_045436	ENSMUSG00000038347	2700054A10Rik	-	RIKEN cDNA 2700054A10 gene	ncRNA
Peaks_1641	chr1	20393415	20394233	+	0	NA	intron (NM_153179, intron 37 of 66)	MTA_Mm-int|LTR|ERVL-MaLR	37370	NR_045734	75028	Mm.417820	NR_045734	ENSMUSG00000089914	4930486I03Rik	-	RIKEN cDNA 4930486I03 gene	ncRNA
Peaks_1649	chr8	27319356	27320118	+	0	NA	Intergenic	L1Md_T|LINE|L1	23692	NR_003107	732482	Mm.463248	NR_003107		Gm9731	-	Fam58a pseudogene	pseudo
Peaks_165	chr2	175800607	175801374	+	0	NA	promoter-TSS (NM_001199308).2	promoter-TSS (NM_001199308).2	47	NM_001199308	100503353	Mm.455970	NM_001199308	ENSMUSG00000078901	Gm14440	OTTMUSG00000016618	predicted gene 14440	protein-coding
Peaks_1650	chr4	145463622	145464374	+	0	NA	promoter-TSS (NR_002888)	promoter-TSS (NR_002888)	-212	NR_002888	545700	Mm.389595	NR_002888	ENSMUSG00000052912	Smarca5-ps	9230115A19Rik|OTTMUSG00000011029	SWI/SNF related, matrix associated, actin depenent ragulator of chromatin, subfamily a, member 5, pseudogene	pseudo
Peaks_1651	chr7	38183004	38184259	+	0	NA	promoter-TSS (NM_028166)	promoter-TSS (NM_028166)	-156	NM_028166	72244	Mm.187554	NM_028166		1600014C10Rik	AI428873	RIKEN cDNA 1600014C10 gene	protein-coding
Peaks_1653	chr2	58282439	58282832	+	0	NA	intron (NM_001033369, intron 5 of 7)	intron (NM_001033369, intron 5 of 7)	5856	NR_040365	100502932	Mm.417207	NR_040365	ENSMUSG00000086995	Gm13544	OTTMUSG00000012672	predicted gene 13544	ncRNA
Peaks_1658	chrX	157677192	157677348	+	0	NA	Intergenic	L1Md_F3|LINE|L1	-21703	NR_045569	66106	Mm.140340	NM_025357	ENSMUSG00000041476	Smpx	1010001C09Rik|Csl	small muscle protein, X-linked	protein-coding
Peaks_1659	chr6	128838838	128839797	+	0	NA	Intergenic	Intergenic	-13002	NM_030599	80782	Mm.6180	NM_030599	ENSMUSG00000079298	Klrb1b	Klrb1d|Ly55b|Ly55d|NKR-P1B|NKR-P1D|Nkrp1-b|Nkrp1d|ly-55b|ly-55d	killer cell lectin-like receptor subfamily B member 1B	protein-coding
Peaks_1666	chr2	140395001	140396276	+	0	NA	5' UTR (NM_028387, exon 1 of 4)	5' UTR (NM_028387, exon 1 of 4)	203	NM_028387	72899	Mm.229466	NM_028387	ENSMUSG00000068205	Macrod2	1110033L15Rik|2610107G07Rik|2900006F19Rik	MACRO domain containing 2	protein-coding
Peaks_1667	chr8	91104126	91104367	+	0	NA	intron (NM_011250, intron 14 of 21)	intron (NM_011250, intron 14 of 21)	29781	NM_001302337	14339	Mm.324588	NM_010241	ENSMUSG00000031667	Aktip	AL023020|Fif|Ft|Ft1|Fts	thymoma viral proto-oncogene 1 interacting protein	protein-coding
Peaks_1673	chr13	52980307	52981459	+	0	NA	5' UTR (NM_017373, exon 1 of 2)	5' UTR (NM_017373, exon 1 of 2)	156	NM_017373	18030	Mm.136604	NM_017373	ENSMUSG00000056749	Nfil3	AV225605|E4BP4	nuclear factor, interleukin 3, regulated	protein-coding
Peaks_1676	chr4	140270041	140270290	+	0	NA	Intergenic	Intergenic	-23354	NM_198610	230868	Mm.298731	NM_198610	ENSMUSG00000040972	Igsf21	BC055811|Gm141	immunoglobulin superfamily, member 21	protein-coding
Peaks_1678	chr6	71227155	71227571	+	0	NA	intron (NM_009762, intron 4 of 8)	intron (NM_009762, intron 4 of 8)	27475	NM_017399	14080	Mm.22126	NM_017399	ENSMUSG00000054422	Fabp1	Fabpl|L-FABP	fatty acid binding protein 1, liver	protein-coding
Peaks_168	chr1	182257188	182257370	+	0	NA	Intergenic	RLTR4_Mm|LTR|ERV1	25480	NM_007853	13244	Mm.29648	NM_007853	ENSMUSG00000038633	Degs1	AA536663|Degs|Des1|Mdes	delta(4)-desaturase, sphingolipid 1	protein-coding
Peaks_1686	chr1	171066600	171066845	+	0	NA	Intergenic	Intergenic	-2070	NR_106103	102466998		NR_106103	ENSMUSG00000099119	Mir6546	Gm27408|mmu-mir-6546	microRNA 6546	ncRNA
Peaks_1688	chr8	3567711	3568148	+	0	NA	promoter-TSS (NM_001024728)	promoter-TSS (NM_001024728)	-69	NM_001024728	546049	Mm.358733	NM_001024728	ENSMUSG00000065952	C330021F23Rik	2610027C06Rik|Rps23r1|Rps23rg1	RIKEN cDNA C330021F23 gene	protein-coding
Peaks_1690	chr11	111065665	111066614	+	0	NA	promoter-TSS (NM_008425)	promoter-TSS (NM_008425)	-25	NM_008425	16518	Mm.4951	NM_008425	ENSMUSG00000041695	Kcnj2	IRK1|Kcnf1|Kir2.1	potassium inwardly-rectifying channel, subfamily J, member 2	protein-coding
[truncated: 366 more rows]

## Sheet: TOMATO_annotated
PeakID (cmd=annotatePeaks.pl Diff_AtacSeq_Analysis_POS.txt mm10 -annStats Diff_AtacSeq_Analysis_TOMATO.stats)	Chr	Start	End	Strand	Peak Score	Focus Ratio/Region Size	Annotation	Detailed Annotation	Distance to TSS	Nearest PromoterID	Entrez ID	Nearest Unigene	Nearest Refseq	Nearest Ensembl	Gene Name	Gene Alias	Gene Description	Gene Type
[truncated: 581 more rows]

[truncated: 2 more sheets: TOMATO_5kb, TOMATO_50kb]
